# Supplementary material for: Absence of Intermediates in the BINOL-Derived Mg(II)/Phosphate-Catalyzed Desymmetrizative Ring Expansion of 1-Vinylcyclobutanols
Source: PubMed Central journal article supplement (PMC8749959; doi:10.1021/acs.joc.1c02699), 2021-12-20
Supplement: jo1c02699_si_001.pdf [file jo1c02699_si_001.pdf]

# Absence of Intermediates in the BINOL-derived Mg(II)/Phosphate-Catalyzed Desymmetrizable Ring Expansion of 1-Vinylcyclobutanols

Estefania Capel,<sup>a</sup> Marta Rodríguez-Rodríguez,<sup>a</sup> Uxue Uria,<sup>\*a</sup> Manuel  
Pedron,<sup>b</sup> Tomas Tejero,<sup>c</sup> Jose L. Vicario<sup>\*a</sup> and Pedro Merino<sup>\*b</sup>

<sup>a</sup> University of the Basque Country (UPV/EHU), P.O. Box 644, 48080 Bilbao (Spain).

E-mail: [uxue.uria@ehu.eus](mailto:uxue.uria@ehu.eus), [jose Luis.vicario@ehu.eus](mailto:jose Luis.vicario@ehu.eus)

<sup>b</sup> Instituto de Biocomputación y Física de Sistemas Complejos (BIFI). Universidad de Zaragoza,  
50009 Zaragoza, Spain.

E-mail: [pmerino@unizar.es](mailto:pmerino@unizar.es)

<sup>c</sup> Instituto de Síntesis y Catalisis Homogénea (ISQCH). Universidad de Zaragoza-CSIC, 50009  
Zaragoza, Spain.

## Supporting Information

## Table of Contents

|                                                                                                                                                                                                      |      |
|------------------------------------------------------------------------------------------------------------------------------------------------------------------------------------------------------|------|
| Table of Contents .....                                                                                                                                                                              | S2   |
| General Information .....                                                                                                                                                                            | S4   |
| Screening of reaction conditions .....                                                                                                                                                               | S6   |
| Synthesis and characterization of starting materials 1a-n. ....                                                                                                                                      | S9   |
| - Synthesis of $\alpha$ -vinylarenes i-v. ....                                                                                                                                                       | S9   |
| - Synthesis of 3,3-substitutedcyclobutanones I-V. ....                                                                                                                                               | S10  |
| - Synthesis of 1-bromovinylarenes VI-XIV.....                                                                                                                                                        | S12  |
| - Synthesis of 3,3-disubstituted-1-(1-arylvinyl)cyclobutan-1-ols, 1a-1n.....                                                                                                                         | S14  |
| Synthesis and characterization of products 3a-3n. ....                                                                                                                                               | S25  |
| Synthesis and characterization of products 4a and 3a.....                                                                                                                                            | S38  |
| Synthesis and characterization of catalysts 2b and 2k-2m.....                                                                                                                                        | S40  |
| Non linear effect study. ....                                                                                                                                                                        | S43  |
| Hammett study .....                                                                                                                                                                                  | S44  |
| X-Ray analysis of product 3j.....                                                                                                                                                                    | S46  |
| $^1\text{H}$ , $^{13}\text{C}\{^1\text{H}\}$ (75.5 MHz), $^{19}\text{F}$ and $^{31}\text{P}$ NMR spectra of cyclobutanones, 1a-n, 3a-n, 4a, 4i and catalysts 2a-b and 2k-m in $\text{CDCl}_3$ )..... | S50  |
| $^{31}\text{P}$ NMR (122 MHz, $\text{CDCl}_3$ ) spectra of catalyst mixtures for non linear effect study....                                                                                         | S95  |
| HPLC analysis.....                                                                                                                                                                                   | S98  |
| Computational Studies .....                                                                                                                                                                          | S112 |
| The Catalyst .....                                                                                                                                                                                   | S112 |
| Unsubstituted Model .....                                                                                                                                                                            | S113 |
| Real model with Achiral Catalyst .....                                                                                                                                                               | S119 |
| Optimized geometries.....                                                                                                                                                                            | S120 |
| Intrinsic reaction coordinates .....                                                                                                                                                                 | S122 |
| Energies .....                                                                                                                                                                                       | S124 |
| Benchmarking.....                                                                                                                                                                                    | S125 |

|                                        |      |
|----------------------------------------|------|
| Energy profiles .....                  | S128 |
| NCI Analysis .....                     | S130 |
| ELF Analysis .....                     | S133 |
| Stabilization of the intermediate..... | S150 |
| Real Model with Real Catalyst .....    | S153 |
| Molecular Dynamic Simulations.....     | S157 |
| Cartesian Coordinates .....            | S162 |

## General Information

*Analytical grade solvents and commercially available reagents* were used without further purification. *Anhydrous solvents* were purified and dried with activated molecular sieves prior to use.<sup>1</sup> For reactions carried out under inert conditions, the argon was previously dried through a column of P<sub>2</sub>O<sub>5</sub> and CaCl<sub>2</sub>. All the glassware was dried for 12 hours prior to use in an oven at 140°C, and allowed to cool under a dehumidified atmosphere. Reactions were monitored using analytical thin layer chromatography (TLC), in pre-coated silica-backed plates (Merck Kiesegel 60 F254). *Flash column chromatography* was performed on standard silica gel (Silicycle 40-63, 230-400 mesh) using standard visualizing agents: UV fluorescence (254 and 366 nm), potassium permanganate/Δ and phosphomolybdic acid stains (PMA)/Δ. For the removal of the solvents under reduced pressure Büchi R series rotatory evaporators were used. For precision weighting Sartorius Analytical Balance Practum 224-1S was used (±0.1 mg). *NMR spectra* were recorded at 25°C on a Bruker AC-300 spectrometer (300 MHz for <sup>1</sup>H and 75.5 MHz for <sup>13</sup>C). <sup>1</sup>H NMR and <sup>13</sup>C{<sup>1</sup>H} NMR chemical shifts (δ) are reported in ppm with the solvent (or TMS) resonance as the internal standard (CHCl<sub>3</sub>: 7.26 ppm (<sup>1</sup>H)) and (CDCl<sub>3</sub>: 77.16 ppm (<sup>13</sup>C)). Data are reported as follows: chemical shift, multiplicity (d = doublet, t = triplet, q = quartet, br = broad, m = multiplet), coupling constants (Hz) and integration. *High resolution mass spectra (HRMS)* were recorded using an Aquity UPLC coupled to a QTOF mass spectrometer (SYNAPT G2 HDMS) using electrospray ionization (ESI+). *GC-MS analyses* were performed on an Agilent 7890A gas chromatograph coupled to an Agilent 5975 quadrupole mass spectrometer under electronic impact ionization (EI) 70 eV. *Melting points (M.p.)* were measured in a Stuart SMP30 apparatus in open capillary tubes and are uncorrected. The enantiomeric excess (e.e.) of the products was determined by *High Performance Liquid Chromatography* on a chiral stationary phase in a Waters chromatograph coupled to a Waters photodiode array detector. Daicel Chiralpak AS-H and Chiralcel IA and OD-3 columns (0.46 x 25 cm) were used; specific conditions are indicated for each case. *Specific optical rotations* ([α]<sub>D</sub><sup>20</sup>) were measured at 20°C on a Jasco P-2000 polarimeter with sodium lamp at 589 nm and a path of length of 1 dm. Solvent and concentration are specified in each case. *Infrared spectra (IR)* were measured

---

<sup>1</sup>(a) W. L. F. Armarego, C. L. L. Chai. Purification of Laboratory Chemicals, 7th ed.; Elsevier: Oxford, 2012. (b) D. B. G. Williams, M. Lawton, *J. Org. Chem.* **2010**, *75*, 8351.

in a Jasco FT/IR 4100 (ATR) in the interval between 4000 and 600  $\text{cm}^{-1}$  with a 4  $\text{cm}^{-1}$  resolution. *X-ray* data collections were performed in an Agilent Supernova diffractometer equipped with an Atlas CCD area detector, and a  $\text{CuK}\alpha$  micro-focus source with multilayer optics ( $\lambda = 1.54184 \text{ \AA}$ , 250  $\mu\text{m}$  FWHM beam size). The sample was kept at 150 K with an Oxford Cryosystems Cryostream 700 cooler. The quality of the crystals was checked under a polarizing microscope, and a suitable crystal or fragment was mounted on a Mitegen Micromount<sup>TM</sup> using Paratone N inert oil and transferred to the diffractometer.

## Screening of reaction conditions

Table S 1. Screening of brominating agents.<sup>a</sup>

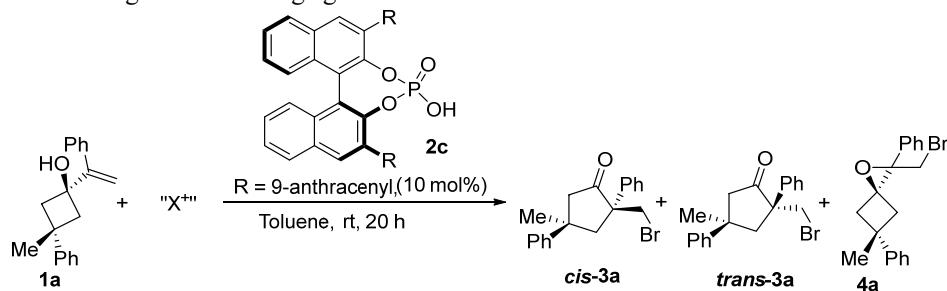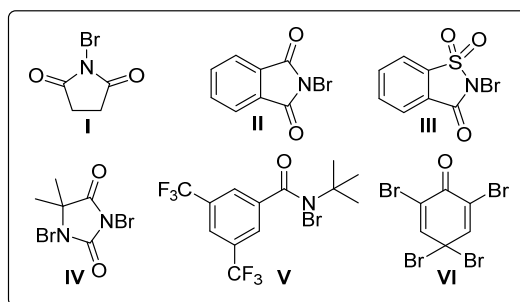

| Entry | "X <sup>+</sup> " | Conversion | Global Yield (%) <sup>b</sup> | Ratio (3a:4a) <sup>c</sup> | dr 3a ( <i>cis</i> : <i>trans</i> ) <sup>c</sup> | ee (%) ( <i>cis</i> -3a/ <i>trans</i> -3a/4a) <sup>d</sup> |
|-------|-------------------|------------|-------------------------------|----------------------------|--------------------------------------------------|------------------------------------------------------------|
| 1     | I                 | Complete   | 81                            | 1.2:1                      | 6:1                                              | 50/5/50                                                    |
| 2     | II                | 31         | n.d.                          | 1:1.5                      | 1:-                                              | 50/-/50                                                    |
| 3     | III               | 66         | 61                            | 6:1                        | 2:1                                              | 33/40/25                                                   |
| 4     | IV                | 95         | 70                            | 1.3:1                      | 3:1                                              | 40/74/22                                                   |
| 6     | V                 | 83         | 74                            | 5:1                        | 4:1                                              | 30/40/25                                                   |
| 7     | VI                | 78         | 49                            | 1:1                        | 1:-                                              | 22/-/30                                                    |

<sup>a</sup> Reactions were carried out with 0.10 mmol of cyclobutanol **1a** and 0.11 mmol of NBS in toluene (0.2 M) at room temperature. <sup>b</sup> Yields refer to the mixture of isolated products by column chromatography. <sup>c</sup> Ratio calculated in reaction crude by <sup>1</sup>H-RMN <sup>d</sup> Calculated by HPLC on chiral stationary phase.

**Table S 2.** Screening of metal phosphates.<sup>a</sup>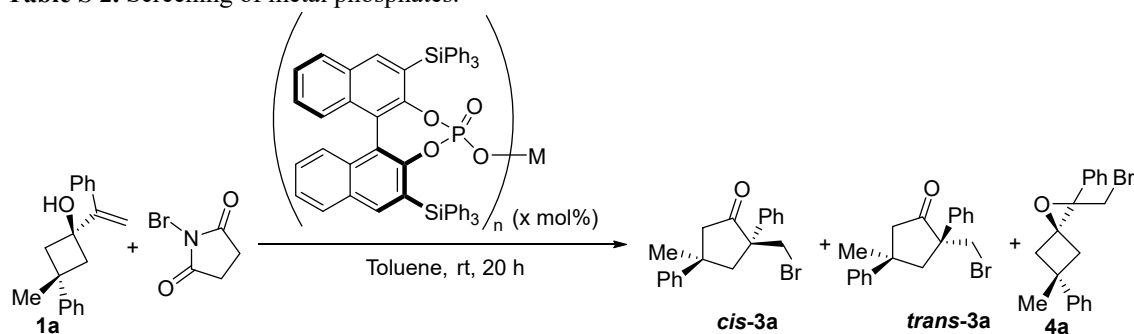

| Entr<br>y      | x mol<br>% | Cat. | M <sup>n+</sup>  | Global<br>Yield (%) <sup>b</sup> | Ratio<br>(3a:4a <sub>trans</sub> ) <sup>c</sup> | dr 3a<br>(cis:trans) <sup>c</sup> | ee cis-3a (%) <sup>d</sup> |
|----------------|------------|------|------------------|----------------------------------|-------------------------------------------------|-----------------------------------|----------------------------|
| 1 <sup>e</sup> | 5          | 2b   | Mg <sup>2+</sup> | 89                               | >20:1                                           | 16:1                              | 87                         |
| 2 <sup>e</sup> | 5          | 2k   | Ca <sup>2+</sup> | 87                               | 19.5:1                                          | 7:1                               | 60                         |
| 3 <sup>f</sup> | 10         | 2l   | Na <sup>+</sup>  | 60                               | 7:1                                             | 10:1                              | 35                         |
| 4 <sup>f</sup> | 10         | 2m   | K <sup>+</sup>   | 81                               | 13:1                                            | 5.5:1                             | 66                         |

<sup>a</sup> Reactions were carried out with 0.10 mmol of cyclobutanol **1a** and 0.11 mmol of NBS in toluene (0.2 M) at room temperature. <sup>b</sup> Yields refer to the mixture of isolated products by column chromatography. <sup>c</sup> Ratio calculated in reaction crude by <sup>1</sup>H-RMN. <sup>d</sup> Calculated by HPLC on chiral stationary phase. <sup>e</sup> Reactions carried out with 5 mol % of chiral phosphate. <sup>f</sup> Reactions carried out with 10 mol % of chiral phosphate.

**Table S 3.** Solvent screening.<sup>a</sup>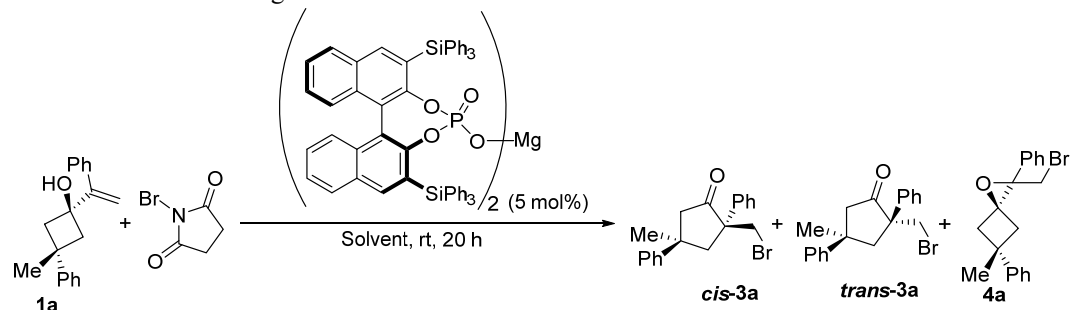

| Entry | Solvent          | Global Yield<br>(%) <sup>b</sup> | Ratio (3a:4a) <sup>c</sup> | dr 3a (cis:trans) <sup>c</sup> | ee cis-3a (%) <sup>d</sup> |
|-------|------------------|----------------------------------|----------------------------|--------------------------------|----------------------------|
| 1     | Toluene          | 89                               | >20:1                      | 16:1                           | 87                         |
| 2     | DCM              | 84                               | 3.7:1                      | 10:1                           | Racemic                    |
| 3     | AcOEt            | 73                               | 2.7:1                      | 7:1                            | 32                         |
| 4     | THF              | 73                               | 3.5:1                      | 6:1                            | 6                          |
| 5     | <i>o</i> -xylene | 83                               | >20:1                      | 14:1                           | 79                         |
| 6     | <i>m</i> -xylene | 84                               | >20:1                      | 13:1                           | 87                         |
| 7     | Mesitylene       | 81                               | >20:1                      | 11:1                           | 88                         |

<sup>a</sup> Reactions were carried out with 0.10 mmol of cyclobutanol **1a** and 0.11 mmol of NBS in toluene (0.2 M) at room temperature. <sup>b</sup> Yields refer to the mixture of isolated products by column chromatography. <sup>c</sup> Ratio calculated in reaction crude by <sup>1</sup>H-RMN. <sup>d</sup> Calculated by HPLC on chiral stationary phase.

**Table S 4.** Effect of temperature.<sup>a</sup>

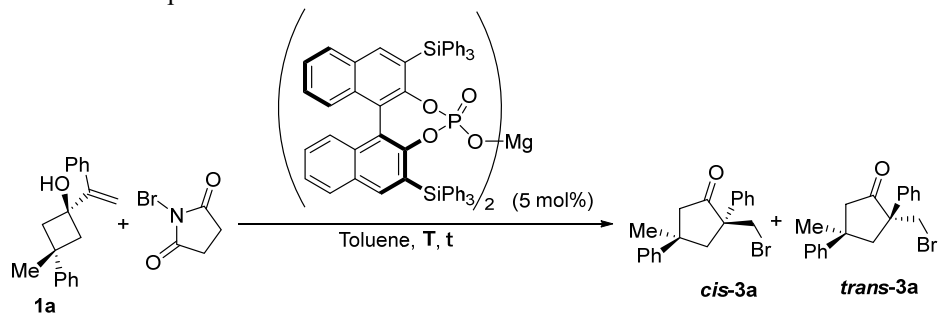

| Entry                 | T (°C)     | t (h) | Yield. <b>3a</b> (%) <sup>b</sup> | Ratio <b>3a</b> ( <i>cis:trans</i> ) <sup>c</sup> | ee <i>cis</i> - <b>3a</b> (%) <sup>d</sup> |
|-----------------------|------------|-------|-----------------------------------|---------------------------------------------------|--------------------------------------------|
| <b>1</b>              | rt         | 20    | 89                                | 16:1                                              | 87                                         |
| <b>7</b>              | <b>50</b>  | 8     | 88                                | 9.5:1                                             | 87                                         |
| <b>8</b>              | <b>0</b>   | 20    | 90                                | >20:1                                             | 91                                         |
| <b>9</b>              | <b>-20</b> | 48    | 89                                | >20:1                                             | 92                                         |
| <b>10<sup>e</sup></b> | <b>0</b>   | 72    | 95                                | >20:1                                             | 92                                         |

<sup>a</sup> Reactions were carried out with 0.10 mmol of cyclobutanol **1a** and 0.11 mmol of NBS in toluene (0.2 M). In all cases the ketone:epoxide ratio was > 20:1. <sup>b</sup> Yields refer to the mixture of isolated products by column chromatography. <sup>c</sup> Ratio calculated in reaction crude by <sup>1</sup>H-RMN. <sup>d</sup> Calculated by HPLC on chiral stationary phase. <sup>e</sup> Reaction carried out with 2.5 mol % of chiral phosphate **2b**.



## Synthesis and characterization of starting materials 1a-n.

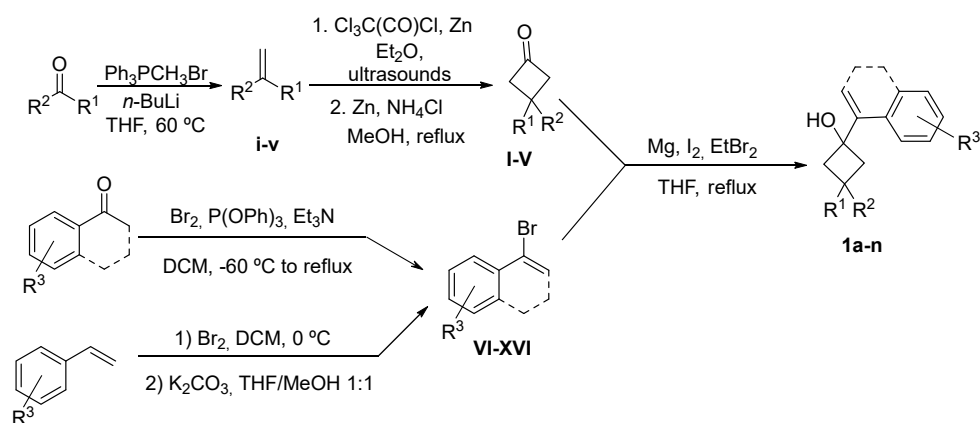

**Scheme S 1.** General overview of the synthesis of starting materials **1a-n**.

### - Synthesis of $\alpha$ -vinylarenes i-v.

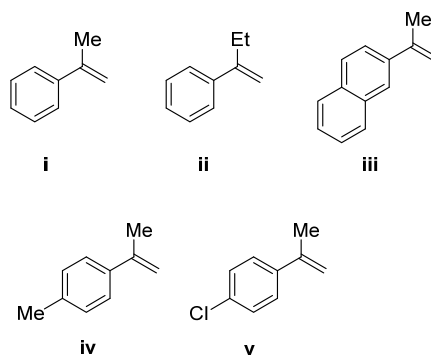

**Figure S 1.**  $\alpha$ -vinylarenes employed for the synthesis of cyclobutanones.

Compound **i** was purchased from commercial sources and used without further purification. **ii-v**<sup>2</sup> are reported compounds and were prepared by Wittig olefination of the corresponding ketones following the procedures described in the literature<sup>3</sup>.

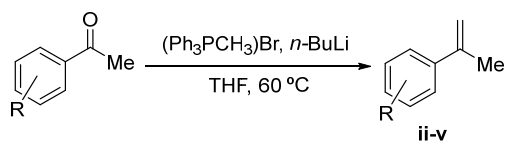

**Scheme S 2.** Synthesis of  $\alpha$ -vinylarenes from carbonyl compounds **ii-v**.

<sup>2</sup>J. Huang, G. Hu, S. An, D. Chen, M. Li, P. Li, *J. Org. Chem.* **2019**, *84*, 9758–9769.

<sup>3</sup>L. Zhang, W. R. Dolbier, B. Sheeller, K. U. Ingold, *J. Am. Chem. Soc.* **2002**, *124*, 6362–6366.

- **Synthesis of 3,3-disubstitutedcyclobutanones I-V.**

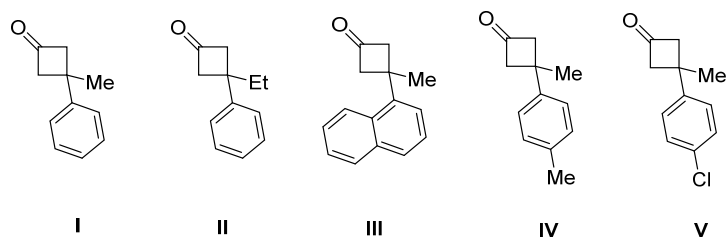

**Figure S 2.** 3,3-disubstitutedcyclobutanones employed for the synthesis of cyclobutanols.

**I**<sup>4</sup>, **II**<sup>5</sup> and **IV-V**<sup>6</sup> are reported compounds. Compounds **I-V** were prepared following the general procedure A<sup>7</sup> previously described.

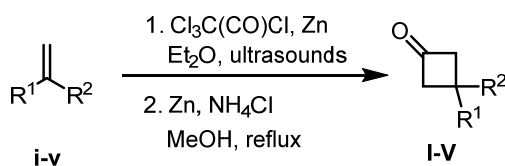

**Scheme S 3.** General procedure A for the synthesis of cyclobutanones.

General procedure A for the synthesis of cyclobutanones.

In a two necked flask provided with a condenser with dry Et<sub>2</sub>O (250 mL) and Zn (4 equiv., 7.8 g, 120 mmol) under Ar atmosphere,  $\alpha$ -methylstyrene (3.90 mL, 30 mmol) was added followed by the dropwise addition of trichloroacetyl chloride (2 equiv., 6.80 mL, 60 mmol) under sonication. The mixture was kept under sonication for 5 h until a brown solution was obtained. Then, the solids were filtrated off through a plug of Celita® and washed with Et<sub>2</sub>O (100 mL). The filtrate was washed with H<sub>2</sub>O (2 x 50 mL), saturated aq. NaHCO<sub>3</sub> (4 x 50 mL) and brine, dried with Na<sub>2</sub>SO<sub>4</sub> and concentrated under vacuum. The crude was passed through a short pad of silica gel with PE:EtOAc 9:1 to obtain 2,2-dichloro-3-methyl-3-phenylcyclobutan-1-one (6.051g, 26.5 mmol) pure enough for the next reaction.

MeOH (70 mL) was added into a flask containing the crude of the previous reaction followed by the addition of ammonium chloride (2.5 equiv., 3.4 g, 63 mmol). The mixture

<sup>4</sup> K. S. Petersen, B. M. Stoltz, *Tetrahedron*, **2011**, *67*, 4352-4357.

<sup>5</sup> (a) W.T. Brady, T. C. Cheng, *J. Organomet. Chem.*, **1977**, *137*, 287-292. (b) T. Seiser, N. Cramer, *Angew. Chem. Int. Ed.* **2008**, *47*, 9294.

<sup>6</sup> T. Matsuda, I. Yuihara, *Chem. Commun.*, **2015**, *51*, 7393-7396.

<sup>7</sup> F. Le Vaillant, M. Garreau, S. Nicolai, G. Gryn'ova, C. Corminboeuf, J. Waser, *Chem. Sci.*, **2018**, *9*, 5883-5889.

was cooled to 0 °C and Zn (5 equiv., 8.2 g, 126 mmol) was added portion wise under stirring. The flask was provided with a condenser and let stirring at 70 °C employing a heating mantle overnight. The solids were filtered off through a plug of Celite®. The filtrate was concentrated under vacuum and diluted with Et<sub>2</sub>O (20 mL) and aq. 1M HCl (20 mL). The layers were separated, and the aqueous layer was extracted with Et<sub>2</sub>O (3 x 20 mL). The crude was purified with PE:EtOAc 9:1 to obtain 3-methyl-3-phenylcyclobutan-1-one (2.6 g, 16.25 mmol) as a colorless oil.

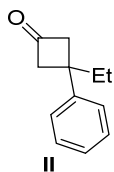

### 3-ethyl-3-phenylcyclobutan-1-one **II**<sup>4</sup>

Following the general procedure A, **II** was purified by flash chromatography (PE:EtOAc 9:1) and obtained as an oil (650 mg; 3.73 mmol; 40 %) starting from  $\alpha$ -ethylstyrene (1.2 g, 9.14 mmol), trichloroacetyl chloride (2.0 mL, 18.3 mmol), Zn (2.4 g; 36.6 mmol) in Et<sub>2</sub>O (15.0 mL). R<sub>f</sub> = 0.48 (PE:EtOAc = 9:1). <sup>1</sup>H NMR (300 MHz, CDCl<sub>3</sub>)  $\delta$  7.41–7.34 (m, 3H, C<sub>Arom</sub>-H), 7.31–7.21 (m, 2H, C<sub>Arom</sub>-H), 3.46–3.35 (m, 2H, C<sup>1</sup>H<sub>2</sub>), 3.19–3.08 (m, 1H, C<sup>2</sup>H<sub>2</sub>), 1.88 (q, *J* = 7.3 Hz, 1H, CH<sub>2</sub>CH<sub>3</sub>), 0.78 (t, *J* = 7.3 Hz, 3H, CH<sub>2</sub>CH<sub>3</sub>). <sup>13</sup>C{<sup>1</sup>H} NMR (75.5 MHz, CDCl<sub>3</sub>)  $\delta$  206.6 (CO), 145.9 (C<sub>Arom</sub>-C), 128.3 (2xC<sub>Arom</sub>-H), 126.8 (2xC<sub>Arom</sub>-C), 126.2 (C<sub>Arom</sub>-H), 57.2 (2xCH<sub>2</sub>), 38.4 (CCH<sub>2</sub>), 36.0 (CH<sub>2</sub>CH<sub>3</sub>), 9.8 (CH<sub>2</sub>CH<sub>3</sub>). IR (ATR) cm<sup>-1</sup>: 1716.34 (C=O). MS (EI) m/z (%): 173.1 (M<sup>+</sup>, 1), 132.1 (71), 117.1 (100).

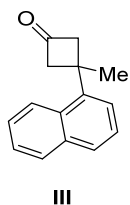

### 3-methyl-3-(naphthalen-1-yl)cyclobutan-1-one **III**

Following the general procedure A, **III** was purified by flash chromatography (PE:EtOAc 9:1) obtained as a white solid (1.0 g; 4.76 mmol; 45 %) starting from 2-(prop-1-en-2-yl)naphthalene (1.8 g, 10.57 mmol), trichloroacetyl chloride (2.4 mL, 21.14 mmol), Zn (2.8 g; 42.3 mmol) in Et<sub>2</sub>O (42.0 mL). R<sub>f</sub> = 0.52 (PE:EtOAc = 9:1). M.p. = 42–43 °C. <sup>1</sup>H

**NMR** (300 MHz, CDCl<sub>3</sub>)  $\delta$  7.92–7.80 (m, 3H, C<sub>Arom</sub>-H), 7.74 (d,  $J$  = 1.8 Hz, 1H, C<sub>Arom</sub>-H), 7.57–7.41 (m, 3H, C<sub>Arom</sub>-H), 3.67–3.53 (m, 2H, C<sup>1</sup>H<sub>2</sub>), 3.29–3.13 (m, 2H, C<sup>2</sup>H<sub>2</sub>), 1.71 (s, 3H, CH<sub>3</sub>). **<sup>13</sup>C{<sup>1</sup>H}** **NMR** (75.5 MHz, CDCl<sub>3</sub>)  $\delta$  206.5 (C=O), 145.5 (C<sub>Arom</sub>-C), 133.3 (C<sub>Arom</sub>-C), 131.9 (C<sub>Arom</sub>-C), 128.6 (C<sub>Arom</sub>-H), 127.7 (C<sub>Arom</sub>-H), 127.6 (C<sub>Arom</sub>-H), 126.4 (C<sub>Arom</sub>-H), 125.8 (C<sub>Arom</sub>-H), 124.4 (C<sub>Arom</sub>-H), 123.7 (C<sub>Arom</sub>-H), 59.3 (2xCH<sub>2</sub>), 34.1 (CCH<sub>2</sub>), 30.9 (CH<sub>3</sub>). **IR** (ATR) cm<sup>-1</sup>: 1781.9. **MS** (EI)  $m/z$  (%): 210.2 (M<sup>+</sup>, 98), 168.2 (100), 153.1 (99), 128.1 (62). **HRMS** (ESI<sup>+</sup>):  $m/z$  calculated for [C<sub>15</sub>H<sub>14</sub>ONa]<sup>+</sup> 233.0942; found 233.0940 [M+Na]<sup>+</sup>

- **Synthesis of 1-bromovinylarenes VI-XIV.**

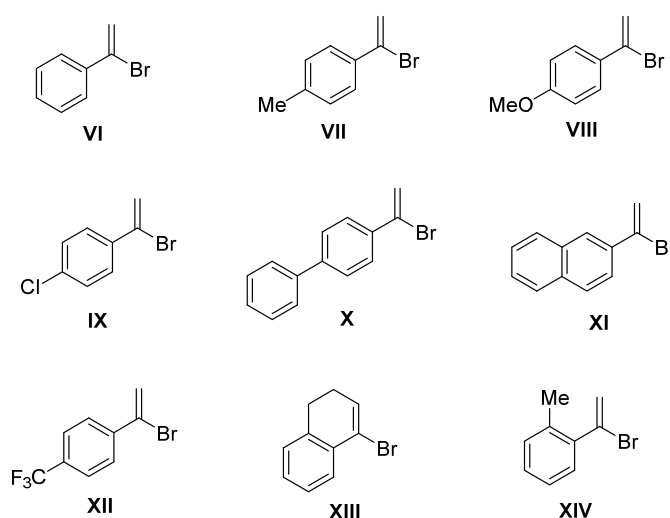

**Figure S 3.** 1-Bromovinylarenes employed for the formation of organomagnesium compounds.

**VI** was obtained from commercial sources and used without previous purification. Compounds **VII-XII**<sup>8</sup>, **XIII**<sup>9</sup> and **XIV**<sup>8</sup> are reported compounds. **VII-XI** and **XIII-XIV** were prepared following the general procedure B<sup>10</sup> and **XII** following the general procedure C<sup>11</sup> described in the literature.

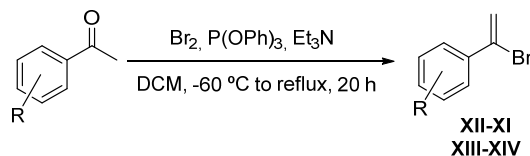

**Scheme S 4.** General procedure B for the synthesis of 1-bromovinylarenes.

<sup>8</sup> S. Alazet, J. Preindl, R. Simonet-Davin, S. Nicolai, A. Nanchen, T. Meyer, J. Waser, *J. Org. Chem.* **2018**, 83, 12334-12356.

<sup>9</sup> E. Napolitano, R. Fiaschi, E. Mastrorilli. *Synthesis*, **1986**, 2, 122-125.

<sup>10</sup> A. Spaggiari, D. Vaccari, P. Davoli, G. Torre, F. Prati, *J. Org. Chem.* **2007**, 72, 2216-2219.

<sup>11</sup> A. V. Chernykh, D. S. Radchenko, A. V. Chernykh, I. S. Kondratov, N. A. Tolmachova, O. P. Datsenko, M. A. Kurkunov, S. X. Zozulya, Y. P. Kheylik, K. Bartels, C. G. Daniliuc, G. Haufe. *Eur. J. Org. Chem.* **2015**, 29, 6466-6471.

### General procedure B for the synthesis of 1-bromovinylarenes.

To an oven dry two necked flask provided with a stir bar and a condenser, bromine (1.25 equiv., 0.64 mL, 12.5 mmol) was added to a stirring solution of triphenylphosphite (1.1 equiv., 3 mL, 11 mmol) in anhydrous dichloromethane (33 mL) at -60 °C under Ar atmosphere. A pail orange solution was formed. Anhydrous triethylamine (1.35 equiv., 1.90 mL, 13.5 mmol) and 1-(p-tolyl)ethan-1-one (1.34 mL, 10 mmol) were also added. The resulting reaction mixture was stirred 18 h while warming to rt and then was refluxed employing an aluminium heating block for 2h. The reaction was cooled to rt, the solvent was removed under vacuum and the crude was purified by silica gel column chromatography with PE:EtOAc 95:5 to obtain 1-(1-bromovinyl)-4-methylbenzene as a pale yellow oil (928 mg, 4.71 mmol, 47 %).

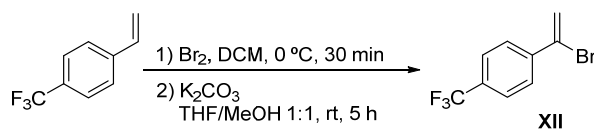

**Scheme S 5.** General procedure C for the synthesis of 1-bromovinylarene **XII**.

### General procedure C for the synthesis of 1-bromovinylarenes.

Bromine (1.2 equiv, 14 mmol, 0.72 mL) was slowly added, over a period of 5 minutes, to a solution of 1-(trifluoromethyl)-4-vinylbenzene (11.7 mmol, 2.1 g) in anhydrous dichloromethane (23.4 mL) at 0 °C. The reaction mixture was stirred at this temperature for 30 minutes, controlling by TLC that the starting material was totally consumed. The reaction was quenched with a saturated solution of Na<sub>2</sub>S<sub>2</sub>O<sub>3</sub> (15 mL) and the product was extracted with dichloromethane (3x 30mL). The combined organic layers were washed with brine and dried over Na<sub>2</sub>SO<sub>4</sub>. After filtering the drying agent, the solvent was evaporated and the crude mixture was directly dissolved in THF/MeOH (1:1) (15 mL: 15 mL), followed by the addition of K<sub>2</sub>CO<sub>3</sub> (2 equiv, 23.4 mmol, 3.2 g). The reaction mixture was stirred at room temperature for 5 h. The solvent was evaporated, and water was added (15 mL). The product was extracted with pentane (3 x 20 mL), those extracts were washed with brine and dried over Na<sub>2</sub>SO<sub>4</sub>. The drying agents was removed by filtration and the solvent was evaporated. The desired product was purified by silica gel column chromatography using petroleum ether as eluent to obtain 1-(1-bromovinyl)-4-(trifluoromethyl)benzene (8.3 mmol, 2.09 g) in a 72% isolated yield.

- Synthesis of 3,3-disubstituted-1-(1-arylvinyl)cyclobutan-1-ols, **1a-1n**.

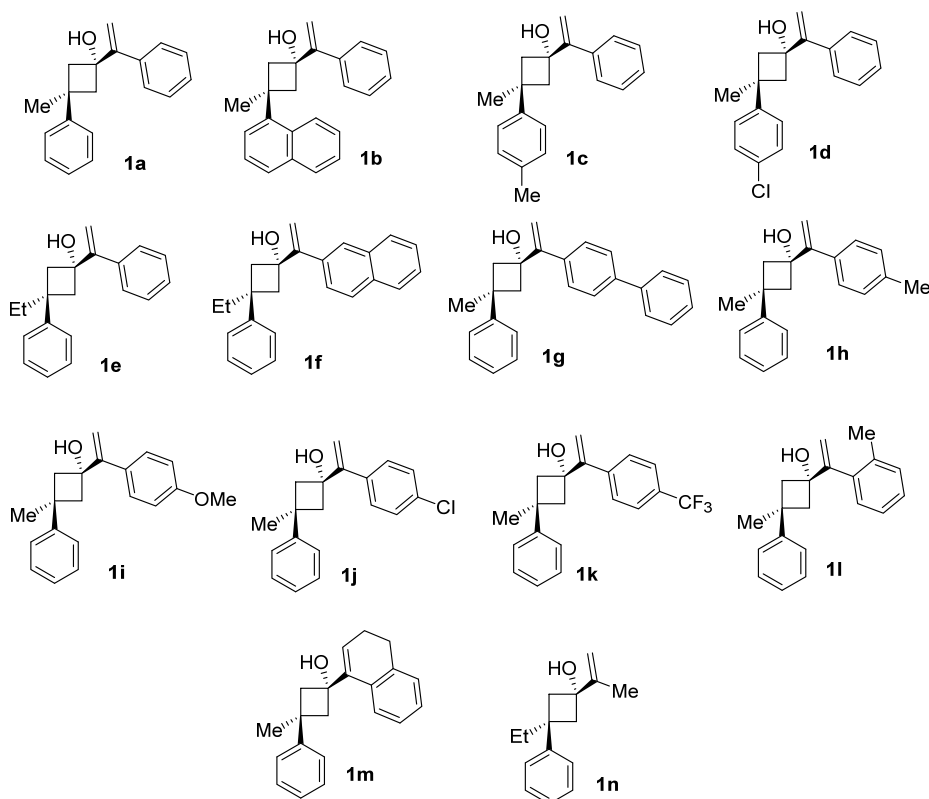

**Figure S 4.** Synthesized 3,3-disubstituted-1-(1-arylvinyl)cyclobutan-1-ol **1a**<sub>trans</sub>-**1n**<sub>trans</sub>.

Compounds **1a-1m** were prepared according to the general procedure D. Compound **1n** was prepared according to the described procedure E.<sup>12</sup>

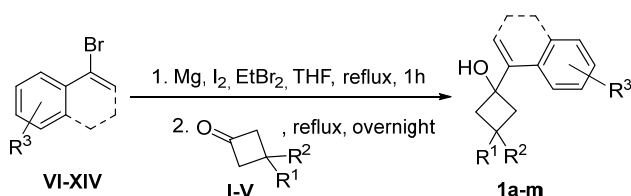

**Scheme S 6.** General procedure D for the synthesis of 3,3-disubstituted-1-(1-arylvinyl)cyclobutan-1-ol **1a-1m**.

General procedure D for the synthesis of 3,3-disubstituted-1-(1-arylvinyl)cyclobutan-1-ols **1a-1m**.

To an oven dried two necked flask provided with a condenser and stir bar, one crystal of iodine and 1,2-dibromoethane (0.4 equiv., 0.21 mL, 2.50 mmol) were added to a suspension of Mg (3 equiv., 450 mg, 18.75 mmol) in THF (20 mL) under Ar atmosphere and was heated to reflux employing an aluminium heating block for at least 10 mins.

<sup>12</sup> R. J. Phipps, L. McMurray, S. Ritter, H. A. Duong, M. J. Gaunt, *J. Am. Chem. Soc.* **2012**, *134*, 10773–10776.

Thereafter, a drop of the corresponding bromoalkene was added to the refluxing mixture in order to start the formation of organomagnesium compound. Once the bubbling starts, the rest of bromoalkene **VI-XIV** (1.3 equiv., 8.13 mmol) in THF (5 mL) was added dropwise keeping the bubbling and the reaction was refluxed employing an aluminium heating block for 1 h. Then a solution of ketone **I-V** (6.25 mmol) in THF (5 mL) was added dropwise and the reaction mixture was refluxed overnight. After being cooled to room temperature it was quenched with saturated aq.  $\text{NH}_4\text{Cl}$  and extracted with  $\text{Et}_2\text{O}$  (3 x 20 mL), the combined organic layers were washed with brine, dried with  $\text{Na}_2\text{SO}_4$ , filtered and concentrate under vacuum. The crude was purified by silica gel column chromatography using PE:EtOAc (95:5 to 9:1) as eluent. Further purification with PE:DCM (1:1 to 3:7) was necessary to separate the diastereoisomers.

Procedure E for the synthesis of 3-ethyl-3-phenyl-1-(prop-1-en-2-yl)cyclobutan-1-ol **1n**

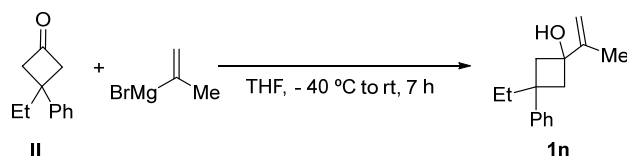

**Scheme S 7.** Synthesis of 3,3-disubstituted-1-(prop-1-en-2-yl)cyclobutan-1-ol **1n**.

3-Ethyl-3-phenylcyclobutanone (300 mg, 1.72 mmol) was dissolved in 1.25 mL of anhydrous THF under Ar atmosphere. The solution was cooled to  $-40^\circ\text{C}$  and isopropenylmagnesium bromide (5.16 mL, 0.5 M in THF) was added to the solution drop by drop over 20 minutes. The reaction was allowed to stir at room temperature for 7 h. After this time, it was quenched with 2 mL of a saturated solution of  $\text{NH}_4\text{Cl}$ . The product was extracted from the aqueous phase with  $\text{Et}_2\text{O}$  (3 x 5 mL) and the combined organic phases were washed with brine, dried over  $\text{Na}_2\text{SO}_4$  and concentrated *in vacuo*. The crude was purified by silica gel column chromatography using PE:DCM (70:30) as eluent to obtain *trans* diastereoisomer as a transparent oil (126 mg; 0.58 mmol; 34%) used in the next reaction and the *cis* one (78 mg; 0.36 mmol; 21 %).

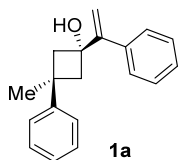

### 3-methyl-3-phenyl-1-(1-phenylvinyl)cyclobutan-1-ol **1a**

The product was prepared following the general procedure D, obtaining a mixture of *cis* and *trans* diastereoisomers (1.510 g, 5.69 mmol, 83%) with a  $dr_{trans:cis} = 1.4:1$ . The *trans* isomer **1a** was isolated as a transparent oil (780 mg; 2.95 mmol; 43 %) by flash chromatography (PE:DCM = 1:1 to 3:7) starting from 1-bromovinylstyrene **VI** (1.06 mL; 8.13 mmol), Mg (450 mg; 18.75 mmol), THF (30.00 mL) and 3-methyl-3-phenylcyclobutanone **I** (1.000 g; 6.25 mmol).  $R_f = 0.4$  (PE:DCM = 4:6).  $^1\text{H NMR}$  (500 MHz,  $\text{CDCl}_3$ )  $\delta$  7.37 (d,  $J = 7.1$  Hz, 2H,  $\text{C}_{\text{Arom-H}}$ ), 7.30 – 7.15 (m, 5H,  $\text{C}_{\text{Arom-H}}$ ), 7.06 (t,  $J = 6.3$  Hz, 3H,  $\text{C}_{\text{Arom-H}}$ ), 5.21 – 5.17 (s, 1H,  $\text{C}=\text{CH}_a\text{H}_b$ ), 5.13 (s, 1H,  $\text{C}=\text{CH}_a\text{H}_b$ ), 2.79 (d,  $J = 13.3$  Hz, 2H,  $\text{C}^1\text{H}_2$ ), 2.42 (d,  $J = 13.4$  Hz, 2H,  $\text{C}^2\text{H}_2$ ), 1.59 (s, 3H,  $\text{CH}_3$ ).  $^{13}\text{C}\{^1\text{H}\}$  NMR (75.5 MHz,  $\text{CDCl}_3$ )  $\delta$  153.7 ( $\text{C}=\text{CH}_2$ ), 151.9 ( $\text{C}_{\text{Arom-C}}$ ), 138.8 ( $\text{C}_{\text{Arom-C}}$ ), 128.2 ( $2\times\text{C}_{\text{Arom-H}}$ ), 128.2 ( $2\times\text{C}_{\text{Arom-H}}$ ), 127.6 ( $\text{C}_{\text{Arom-H}}$ ), 127.5 ( $2\times\text{C}_{\text{Arom-H}}$ ), 125.3 ( $\text{C}_{\text{Arom-H}}$ ), 125.2 ( $2\times\text{C}_{\text{Arom-H}}$ ), 113.0 ( $\text{C}=\text{CH}_2$ ), 74.0 ( $\text{C-OH}$ ), 47.1 ( $2\times\text{CH}_2$ ), 35.8 ( $\text{C-CH}_2$ ), 32.4 ( $\text{CH}_3$ ). IR (ATR)  $\text{cm}^{-1}$ : 3648 (O-H), 3024 (=C-H), 2961 (C-H), 1625 (C=C), 1450 ( $\text{CH}_3$ ). MS (EI)  $m/z$  (%): 263.2 ( $\text{M}^+$ , 34). HRMS (ESI $^+$ ):  $m/z$  calculated for  $[\text{C}_{19}\text{H}_{20}\text{O} - \text{H}_2\text{O} + \text{H}]^+$  247.1488; found 247.1487  $[\text{M} - \text{H}_2\text{O} + \text{H}]^+$ .

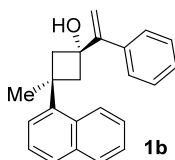

### 3-methyl-3-(naphthalen-2-yl)-1-(1-phenylvinyl)cyclobutan-1-ol **1b**

The product was prepared following the general procedure D, obtaining a mixture of *cis* and *trans* diastereoisomers (396 mg, 1.26 mmol, 88 %) with a  $dr_{trans:cis} = 1.2:1$ . The *trans* isomer **1b** was isolated as a white solid (198 mg; 0.63 mmol; 44 %) by flash chromatography (PE:DCM = 4:6) starting from 1-bromovinylstyrene **VI** (0.24 mL; 1.86 mmol), Mg (103 mg; 4.29 mmol), THF (7 mL), and 3-methyl-3-(naphthalen-1-yl)cyclobutan-1-one **III** (300 mg; 1.43 mmol).  $R_f = 0.4$  (PE:DCM = 4:6).  $\text{M.p.} = 115\text{--}118$  °C.  $^1\text{H NMR}$  (300 MHz,  $\text{CDCl}_3$ )  $\delta$  7.87 – 7.77 (m, 3H,  $\text{C}_{\text{Arom-H}}$ ), 7.58 (d,  $J = 1.7$  Hz, 1H,  $\text{C}_{\text{Arom-H}}$ ), 7.55 – 7.44 (m, 4H,  $\text{C}_{\text{Arom-H}}$ ), 7.36 (m, 4H,  $\text{C}_{\text{Arom-H}}$ ), 5.29 (d,  $J = 0.7$  Hz,



1H, C=CH<sub>a</sub>H<sub>b</sub>), 5.27 (d, *J* = 0.7 Hz, 1H, C=CH<sub>a</sub>H<sub>b</sub>), 3.03 (d, *J* = 13.4 Hz, 2H, C<sup>1</sup>H<sub>2</sub>), 2.63 (d, *J* = 13.3 Hz, 2H, C<sup>2</sup>H<sub>2</sub>), 2.10 (s, 1H, OH), 1.80 (s, 3H, CH<sub>3</sub>). <sup>13</sup>C{<sup>1</sup>H} NMR (75.5 MHz, CDCl<sub>3</sub>) δ 153.7 (C=CH<sub>2</sub>), 149.0 (C<sub>Arom</sub>-C), 138.9 (C<sub>Arom</sub>-C), 133.3 (C<sub>Arom</sub>-C), 131.6 (C<sub>Arom</sub>-C), 128.3 (2xC<sub>Arom</sub>-H), 128.0 (C<sub>Arom</sub>-H), 127.7 (2xC<sub>Arom</sub>-H), 127.5 (3xC<sub>Arom</sub>-H), 126.0 (C<sub>Arom</sub>-H), 125.3 (C<sub>Arom</sub>-H), 124.5 (C<sub>Arom</sub>-H), 122.9 (C<sub>Arom</sub>-H), 113.1 (C=CH<sub>2</sub>), 73.9 (C-OH), 47.2 (2xCH<sub>2</sub>), 35.9 (CCH<sub>2</sub>), 32.3 (CH<sub>3</sub>). IR (ATR) cm<sup>-1</sup>: 3547 (O-H), 3022 (=C-H), 2961 (C-H), 1625 (C=C), 1442 (CH<sub>3</sub>). MS (EI) m/z (%): 168.1 (100), 153.1 (29), 128.1 (26), 103.1 (21). HRMS (ESI<sup>+</sup>): m/z calculated for [C<sub>23</sub>H<sub>22</sub>O + Na]<sup>+</sup> 337.1568; found 337.1563 [M+Na]<sup>+</sup>.

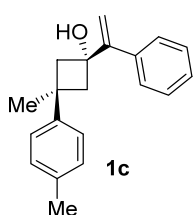

### 3-methyl-1-(1-phenylvinyl)-3-(p-tolyl)cyclobutan-1-ol **1c**.

The product was prepared following the general procedure D, obtaining a mixture of *cis* and *trans* diastereoisomers (416 mg, 1.49 mmol, 82%) with a *dr*<sub>*trans*:*cis*</sub> = 1.3:1. The *trans* isomer **1c** was isolated as a transparent oil (0.67 mmol; 188 mg; 39 %) by flash chromatography (PE:DCM = 6:4) starting from 1-bromovinylstyrene **VI** (0.29 mL; 2.24 mmol), Mg (125 mg; 5.16 mmol), THF (8.3 mL), and 3-methyl-3-(p-tolyl)cyclobutan-1-one **IV** (300 mg; 1.72 mmol). R<sub>f</sub> = 0.20 (PE:DCM = 60:40). <sup>1</sup>H NMR (300 MHz, CDCl<sub>3</sub>) δ 7.49–7.42 (m, 2H, C<sub>Arom</sub>-H), 7.36–7.27 (m, 3H, C<sub>Arom</sub>-H), 7.10 (d, *J* = 8.2 Hz, 2H, C<sub>Arom</sub>-H), 7.04 (d, *J* = 8.2 Hz, 2H, C<sub>Arom</sub>-H), 5.25 (s, 1H, C=CH<sub>a</sub>H<sub>b</sub>), 5.21 (s, 1H, C=CH<sub>a</sub>H<sub>b</sub>), 2.85 (d, *J* = 13.5 Hz, 2H, C<sup>1</sup>H<sub>2</sub>), 2.48 (d, *J* = 13.5 Hz, 2H, C<sup>2</sup>H<sub>2</sub>), 2.31 (s, 3H, C<sub>Arom</sub>-CH<sub>3</sub>), 1.93 (s, 1H, OH), 1.66 (s, 3H, CH<sub>3</sub>). <sup>13</sup>C{<sup>1</sup>H} NMR (75.5 MHz, CDCl<sub>3</sub>) δ 153.7 (C=CH<sub>2</sub>), 148.9 (C<sub>Arom</sub>-C), 138.8 (C<sub>Arom</sub>-C), 134.7 (C<sub>Arom</sub>-CH<sub>3</sub>), 128.8 (2xC<sub>Arom</sub>-H), 128.2 (2xC<sub>Arom</sub>-H), 127.6 (C<sub>Arom</sub>-H), 127.4 (2xC<sub>Arom</sub>-H), 125.0 (2xC<sub>Arom</sub>-H), 112.9 (C=CH<sub>2</sub>), 73.9 (C-OH), 47.2 (2xCH<sub>2</sub>), 35.4 (C-CH<sub>3</sub>), 32.4 (CH<sub>3</sub>), 20.9 (C<sub>Arom</sub>-CH<sub>3</sub>). IR (ATR) cm<sup>-1</sup>: 3427 (O-H), 2974 (C-H), 1626 (C=C). MS (EI) m/z (%): 132.1 (100), 165.0 (15), 245.1 (15), 277.9 (M<sup>+</sup>, 2). HRMS (ESI<sup>+</sup>): m/z calculated for [C<sub>20</sub>H<sub>22</sub>O-H<sub>2</sub>O+H]<sup>+</sup> 261.1643; found 261.1635 [M-H<sub>2</sub>O+H]<sup>+</sup>.

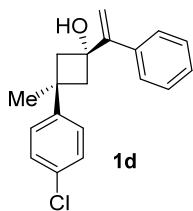

### 3-(4-chlorophenyl)-3-methyl-1-(1-phenylvinyl)cyclobutan-1-ol **1d**

The product was prepared following the general procedure D, obtaining a mixture of *cis* and *trans* diastereoisomers (377 mg, 1.26 mmol, 35%) with a  $dr_{trans:cis} = 1.7:1$ . The *trans* isomer **1d** was isolated as a transparent oil (0.16 mmol; 47.6 mg; 10 %) by flash chromatography (PE:DCM = 7:3) starting from 1-bromovinylstyrene **VI** (0.26 mL; 2.03 mmol), Mg (114 mg; 4.68 mmol), THF (7.5 mL), and 3-(4-chlorophenyl)-3-methylcyclobutan-1-one **V** (300 mg; 1.56 mmol).  $R_f = 0.19$  (PE:DCM = 6:4).  $^1\text{H NMR}$  (300 MHz,  $\text{CDCl}_3$ )  $\delta$  7.39–7.33 (m, 2H,  $\text{C}_{\text{Arom-H}}$ ), 7.27–7.19 (m, 3H,  $\text{C}_{\text{Arom-H}}$ ), 7.18–7.12 (m, 2H,  $\text{C}_{\text{Arom-H}}$ ), 7.01–6.94 (m, 2H,  $\text{C}_{\text{Arom-H}}$ ), 5.18 (s, 1H,  $\text{C}=\text{CH}_a\text{H}_b$ ), 5.13 (s, 1H,  $\text{C}=\text{CH}_a\text{H}_b$ ), 2.74 (dd,  $J = 13.4, 2.6$  Hz, 2H,  $\text{C}^1\text{H}_2$ ), 2.41 (dd,  $J = 13.4, 2.6$  Hz, 2H,  $\text{C}^2\text{H}_2$ ), 1.80 (bs, 1H, OH), 1.56 (s, 3H,  $\text{CH}_3$ ).  $^{13}\text{C}\{^1\text{H}\}$  NMR (75.5 MHz,  $\text{CDCl}_3$ )  $\delta$  153.5 ( $\text{C}=\text{CH}_2$ ), 150.2 ( $\text{C}_{\text{Arom-C}}$ ), 138.7 ( $\text{C}_{\text{Arom-C}}$ ), 131.0 ( $\text{C}_{\text{Arom-Cl}}$ ), 128.2 ( $4\times\text{C}_{\text{Arom-H}}$ ), 127.7 ( $\text{C}_{\text{Arom-H}}$ ), 127.4 ( $2\times\text{C}_{\text{Arom-H}}$ ), 126.7 ( $2\times\text{C}_{\text{Arom-H}}$ ), 113.1 ( $\text{C}=\text{CH}_2$ ), 73.7 ( $\text{C-OH}$ ), 47.2 ( $2\times\text{CH}_2$ ), 35.5 ( $\text{C-CH}_3$ ), 32.2 ( $\text{CH}_3$ ). IR (ATR)  $\text{cm}^{-1}$ : 3423 (O-H), 2972 (C-H), 2926 (C-H), 1626 (C=C). MS (EI)  $m/z$  (%): 264.8 (6), 215 (13), 151.9 (93), 115.1 (96), 77 (100). HRMS (ESI<sup>+</sup>):  $m/z$  calculated for  $[\text{C}_{19}\text{H}_{19}\text{ClO-H}_2\text{O+H}]^+$  281.1097; found 281.1094  $[\text{M-H}_2\text{O+H}]^+$ .

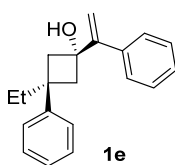

### 3-ethyl-3-phenyl-1-(1-phenylvinyl)cyclobutan-1-ol **1e**

The product was prepared following the general procedure D, obtaining a mixture of *cis* and *trans* diastereoisomers (288.8 mg, 1.03 mmol, 91 %) with a  $dr_{trans:cis} = 1:1$ . The *trans* isomer **1e** was isolated as a white solid (146 mg; 0.52 mmol; 46 %) by flash chromatography (PE:DCM = 4:6) starting from 1-bromovinylstyrene **VI** (0.20 mL; 1.49 mmol), Mg (83 mg; 3.45 mmol), THF (6 mL), and 3-ethyl-3-phenylcyclobutanone **II** (200 mg; 1.15 mmol).  $R_f = 0.4$  (PE:DCM = 4:6).  $\text{M.p.} = 48 - 50$  °C.  $^1\text{H NMR}$  (300 MHz,  $\text{CDCl}_3$ )  $\delta$  7.46 (m, 2H,  $\text{C}_{\text{Arom-H}}$ ), 7.32 (m, 5H,  $\text{C}_{\text{Arom-H}}$ ), 7.18 (m, 1H,  $\text{C}_{\text{Arom-H}}$ ), 7.09 (m, 1H,  $\text{C}_{\text{Arom-H}}$ ), 5.25 (d,  $J = 0.7$  Hz, 1H,  $\text{C}=\text{CH}_a\text{H}_b$ ), 5.23 (d,  $J = 0.7$  Hz, 1H,  $\text{C}=\text{CH}_a\text{H}_b$ ),

2.85 (dd,  $J = 11.0, 2.3$  Hz, 2H, C<sup>1</sup>H<sub>2</sub>), 2.54 (dd,  $J = 11.0, 2.3$  Hz, 2H, C<sup>2</sup>H<sub>2</sub>), 2.07 (q,  $J = 7.3$  Hz, 2H, CH<sub>2</sub>CH<sub>3</sub>), 1.96 (s, 1H, OH), 0.68 (td,  $J = 7.3, 0.8$  Hz, 2H, CH<sub>2</sub>CH<sub>3</sub>). <sup>13</sup>C{<sup>1</sup>H} NMR (75.5 MHz, CDCl<sub>3</sub>) δ 153.7 (C=CH<sub>2</sub>), 148.9 (C<sub>Arom</sub>-C), 138.9 (C<sub>Arom</sub>-C), 128.2 (2xC<sub>Arom</sub>-H), 127.7 (2xC<sub>Arom</sub>-H), 127.6 (C<sub>Arom</sub>-H), 127.5 (2xC<sub>Arom</sub>-H), 126.3 (2xC<sub>Arom</sub>-H), 125.2 (C<sub>Arom</sub>-H), 113.1 (C=CH<sub>2</sub>), 74.1 (C-OH), 45.7 (2xCH<sub>2</sub>), 39.6 (C-CH<sub>2</sub>), 36.7 (CH<sub>2</sub>CH<sub>3</sub>), 8.8 (CH<sub>2</sub>CH<sub>3</sub>). IR (ATR) cm<sup>-1</sup>: 3553 (O-H), 3028 (=C-H), 2945 (C-H), 1620 (C=C), 1442 (CH<sub>3</sub>). MS (EI) m/z (%): 146.1 (30), 132.1 (72), 117.1 (100). HRMS (ESI<sup>+</sup>): m/z calculated for [C<sub>20</sub>H<sub>22</sub>O-H<sub>2</sub>O+H]<sup>+</sup> 261.1643; found 261.1642 [M-H<sub>2</sub>O+H]<sup>+</sup>.

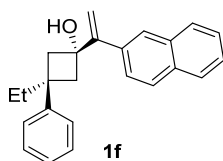

### 3-ethyl-1-(1-(naphthalen-2-yl)vinyl)-3-phenylcyclobutan-1-ol **1f**

The product was prepared following the general procedure D, obtaining a mixture of *cis* and *trans* diastereoisomers (333 mg, 1.01 mmol, 59%) with a  $dr_{trans:cis} = 1.2:1$ . The *trans* isomer **1f** was isolated as a white solid (0.53 mmol; 173 mg; 31 %) by flash chromatography (PE:DCM = 7:3 to 1:1) starting from 2-(1-bromovinyl)naphthalene **XI** (522 mg; 2.24 mmol), Mg (125 mg; 5.16 mmol), THF (11.2 mL), and 3-ethyl-3-phenylcyclobutanone **II** (300 mg; 1.72 mmol). R<sub>f</sub> = 0.19 (PE:DCM = 6:4). M.p. = 75.3–76.1 °C. <sup>1</sup>H NMR (300 MHz, CDCl<sub>3</sub>) δ 7.91–7.88 (m, 1H, C<sub>Arom</sub>-H), 7.84–7.77 (m, 2H, C<sub>Arom</sub>-H), 7.76 (s, 1H, C<sub>Arom</sub>-H), 7.56 (dd,  $J = 8.5, 1.8$  Hz, 1H, C<sub>Arom</sub>-H), 7.50–7.42 (m, 2H, C<sub>Arom</sub>-H), 7.29–7.20 (m, 3H, C<sub>Arom</sub>-H), 7.17–7.10 (m, 1H, C<sub>Arom</sub>-H), 7.08–7.02 (m, 2H, C<sub>Arom</sub>-H), 5.36 (s, 1H, C=CH<sub>a</sub>H<sub>b</sub>), 5.30 (s, 1H, C=CH<sub>a</sub>H<sub>b</sub>), 2.86 (d,  $J = 13.5$  Hz, 2H, C<sup>1</sup>H<sub>2</sub>), 2.57 (d,  $J = 13.4$  Hz, 2H, C<sup>2</sup>H<sub>2</sub>), 2.06 (q,  $J = 7.4$  Hz, 2H, CH<sub>2</sub>CH<sub>3</sub>) 2.01 (s, 1H, OH), 0.66 (t, 3H,  $J = 7.4$  Hz, 3H, CH<sub>3</sub>). <sup>13</sup>C{<sup>1</sup>H} NMR (75.5 MHz, CDCl<sub>3</sub>) δ 153.9 (C=CH<sub>2</sub>), 149.0 (C<sub>Arom</sub>-C), 136.5 (C<sub>Arom</sub>-C), 133.5 (C<sub>Arom</sub>-C), 133.0 (C<sub>Arom</sub>-C), 128.5 (C<sub>Arom</sub>-H), 128.0 (2xC<sub>Arom</sub>-H), 127.9 (C<sub>Arom</sub>-H), 127.8 (C<sub>Arom</sub>-H), 126.6 (2xC<sub>Arom</sub>-H), 126.3 (C<sub>Arom</sub>-H), 126.2 (C<sub>Arom</sub>-H), 126.1 (C<sub>Arom</sub>-H), 125.5 (C<sub>Arom</sub>-H), 113.9 (C=CH<sub>2</sub>), 74.3 (C-OH), 46.0 (2xCH<sub>2</sub>), 39.9 (CCH<sub>2</sub>), 37.0 (C<sub>Arom</sub>-CH<sub>2</sub>-CH<sub>3</sub>), 9.1 (C<sub>Arom</sub>-CH<sub>2</sub>-CH<sub>3</sub>). IR (ATR) cm<sup>-1</sup>: 3438 (O-H), 2964 (C-H), 2929 (C-H), 1598 (C=C). MS (EI) m/z (%): 328.2 (M, 12), 178.0 (43), 152 (100). HRMS (ESI<sup>+</sup>): m/z calculated for [C<sub>23</sub>H<sub>22</sub>O+Na]<sup>+</sup> 337.1541; found 337.1553 [M+Na-14]<sup>+</sup>.

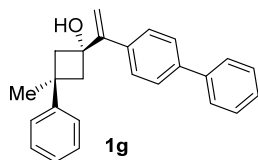

### 1-(1-([1,1'-biphenyl]-4-yl)vinyl)-3-methyl-3-phenylcyclobutan-1-ol **1g**

The product was prepared following the general procedure D, obtaining a mixture of *cis* and *trans* diastereoisomers (301 mg, 0.88 mmol, 47%) with a  $dr_{trans:cis} = 1.6:1$ . The *trans* isomer **1g** was isolated as a white solid (0.41 mmol; 141 mg; 22 %) by flash chromatography (PE:DCM = 6:4 to 1:1) starting from 4-(1-bromovinyl)-1,1'-biphenyl **X** (630 mg; 2.43 mmol), Mg (136 mg; 5.61 mmol), THF (8.9 mL), and 3-methyl-3-phenylcyclobutanone **I** (300 mg; 1.87 mmol).  $R_f = 0.28$  (PE:DCM = 1:1). **M.p.** = 97.5–98.3 °C.  $^1\text{H NMR}$  (300 MHz,  $\text{CDCl}_3$ )  $\delta$  7.55–7.49 (m, 2H,  $\text{C}_{\text{Arom-H}}$ ), 7.46 (s, 4H,  $\text{C}_{\text{Arom-H}}$ ), 7.40–7.32 (m, 2H,  $\text{C}_{\text{Arom-H}}$ ), 7.30–7.16 (m, 3H,  $\text{C}_{\text{Arom-H}}$ ), 7.11–7.03 (m, 3H,  $\text{C}_{\text{Arom-H}}$ ), 5.24 (s, 1H,  $\text{C}=\text{CH}_a\text{H}_b$ ), 5.16 (s, 1H,  $\text{C}=\text{CH}_a\text{H}_b$ ), 2.82 (d,  $J = 13.4, 2.6$  Hz, 2H,  $\text{C}^1\text{H}_2$ ), 2.46 (d,  $J = 13.4, 2.6$  Hz, 2H,  $\text{C}^2\text{H}_2$ ), 1.90 (bs, 1H, OH), 1.61 (s, 3H,  $\text{CH}_3$ ).  $^{13}\text{C}\{^1\text{H}\}$  NMR (75.5 MHz,  $\text{CDCl}_3$ )  $\delta$  153.2 ( $\text{C}=\text{CH}_2$ ), 151.8 ( $\text{C}_{\text{Arom-C}}$ ), 140.7 ( $\text{C}_{\text{Arom-C}}$ ), 140.4 ( $\text{C}_{\text{Arom-C}}$ ), 137.7 ( $\text{C}_{\text{Arom-C}}$ ), 128.8 ( $2\times\text{C}_{\text{Arom-H}}$ ), 128.2 ( $2\times\text{C}_{\text{Arom-H}}$ ), 127.8 ( $2\times\text{C}_{\text{Arom-H}}$ ), 127.3 ( $\text{C}_{\text{Arom-H}}$ ), 127.0 ( $2\times\text{C}_{\text{Arom-H}}$ ), 126.9 ( $2\times\text{C}_{\text{Arom-H}}$ ), 125.3 ( $\text{C}_{\text{Arom-H}}$ ), 125.1 ( $2\times\text{C}_{\text{Arom-H}}$ ), 112.9 ( $\text{C}=\text{CH}_2$ ), 74.0 (C-OH), 47.2 ( $2\times\text{CH}_2$ ), 35.9 ( $\text{CCH}_3$ ), 32.4 ( $\text{C}_{\text{Arom-CH}_3}$ ). **IR** (ATR)  $\text{cm}^{-1}$ : 3438 (O-H), 2971 (C-H), 2925 (C-H), 1601 (C=C). **MS** (EI)  $m/z$  (%): 340.1 (M, 18), 222.1 (48), 178.0 (100). **HRMS** (ESI $^+$ ):  $m/z$  calculated for  $[\text{C}_{25}\text{H}_{24}\text{O}-\text{H}_2\text{O}+\text{H}]^+$  323.1800; found 323.1790  $[\text{M}-\text{H}_2\text{O}+\text{H}]^+$ .

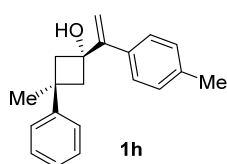

### 3-methyl-3-phenyl-1-(1-(p-tolyl)vinyl)cyclobutan-1-ol **1h**

The product was prepared following the general procedure D, obtaining a mixture of *cis* and *trans* diastereoisomers (467.4 mg, 1.674 mmol, 75 %) with a  $dr_{trans:cis} = 1.5:1$ . The *trans* isomer **1h** was isolated as a yellow oil (0.96 mmol; 268 mg; 43 %) by flash chromatography (PE:DCM = 1:1 to 3:7) starting from 1-(1-bromovinyl)-4-methylbenzene **VII** (424 mg; 2.154 mmol), Mg (163 mg; 6.81 mmol), THF (11.00 mL), and 3-methyl-3-phenylcyclobutanone **I** (363 mg; 2.27 mmol).  $R_f = 0.4$  (PE:DCM = 4:6).  $^1\text{H NMR}$  (300 MHz,  $\text{CDCl}_3$ )  $\delta$  7.42 (d,  $J = 8.2$  Hz, 2H,  $\text{C}_{\text{Arom-H}}$ ), 7.32 (q,  $J = 7.8$  Hz, 2H,  $\text{C}_{\text{Arom-H}}$ ), 7.23 – 7.15 (m, 5H,  $\text{C}_{\text{Arom-H}}$ ), 5.29 (d,  $J = 0.5$  Hz, 1H,  $\text{C}=\text{CH}_a\text{H}_b$ ), 5.22 (d,  $J =$

0.5 Hz, 1H, C=CH<sub>a</sub>H<sub>b</sub>), 2.92 (dd,  $J = 10.8, 2.6$  Hz, 2H, C<sup>1</sup>H<sub>2</sub>), 2.58 (dd,  $J = 10.8, 2.6$  Hz, 2H, C<sup>2</sup>H<sub>2</sub>), 2.40 (s, 3H, C<sub>Arom</sub>-CH<sub>3</sub>), 2.04 (s, 1H, OH), 1.73 (s, 3H, CH<sub>3</sub>). <sup>13</sup>C{<sup>1</sup>H} NMR (75.5 MHz, CDCl<sub>3</sub>) δ 153.5 (C=CH<sub>2</sub>), 151.9 (C<sub>Arom</sub>-C), 137.4 (C<sub>Arom</sub>-C), 135.9 (C<sub>Arom</sub>-C), 128.9 (2xC<sub>Arom</sub>-H), 128.2 (2xC<sub>Arom</sub>-H), 127.4 (2xC<sub>Arom</sub>-H), 125.3 (C<sub>Arom</sub>-H), 125.2 (2xC<sub>Arom</sub>-H), 112.3 (C=CH<sub>2</sub>), 74.0 (C-OH), 47.2 (2xCH<sub>2</sub>), 35.8 (C-CH<sub>3</sub>), 32.4 (C<sub>Arom</sub>-CH<sub>3</sub>), 21.2 (C-CH<sub>3</sub>). IR (ATR) cm<sup>-1</sup>: 3482 (O-H), 3022 (=C-H), 2951 (C-H), 1630 (C=C), 1452 (CH<sub>3</sub>). MS (EI) m/z (%): 278.2 (M<sup>+</sup>, 23), 160.1 (57), 145 (100), 132 (44). HRMS (ESI<sup>+</sup>): m/z calculated for [C<sub>20</sub>H<sub>22</sub>O-H<sub>2</sub>O+H]<sup>+</sup> 261.1643; found 261.1642 [M-H<sub>2</sub>O+H]<sup>+</sup>.

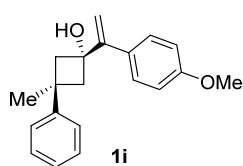

1-(1-(4-methoxyphenyl)vinyl)-3-methyl-3-phenylcyclobutan-1-ol **1i**.

The product was prepared following the general procedure D, obtaining a mixture of *cis* and *trans* diastereoisomers (809 mg, 2.735 mmol, 88 %) with a  $dr_{trans:cis} = 1.2:1$ . The *trans* isomer **1i** was isolated as a yellow solid (340 mg; 1.15 mmol; 37%) by flash chromatography (PE:DCM = 4:6) starting from 1-(1-bromovinyl)-4-methoxybenzene **VIII** (633 mg; 2.97 mmol), Mg (225 mg; 9.38 mmol), THF (15.00 mL), and 3-methyl-3-phenylcyclobutanone **I** (500 mg; 3.13 mmol). R<sub>f</sub> = 0.4 (PE:DCM = 4:6). M.p. = 44-46 °C. <sup>1</sup>H NMR (300 MHz, CDCl<sub>3</sub>) δ 7.33 (d,  $J = 8.9$  Hz, 2H, 2xC<sub>Arom</sub>-H), 7.18 (dd,  $J = 6.4, 1.0$  Hz, 2H, 2xC<sub>Arom</sub>-H), 7.10 – 7.02 (m, 3H, 3xC<sub>Arom</sub>-H), 6.77 (d,  $J = 8.9$  Hz, 2H, 2xC<sub>Arom</sub>-H), 5.12 (d,  $J = 0.6$  Hz, 1H, C=CH<sub>a</sub>H<sub>b</sub>), 5.05 (d,  $J = 0.4$  Hz, 1H, C=CH<sub>a</sub>H<sub>b</sub>), 3.73 (s, 3H, OCH<sub>3</sub>), 2.83 – 2.73 (m, 2H, C<sup>1</sup>H<sub>2</sub>), 2.47 – 2.36 (m, 2H, C<sup>2</sup>H<sub>2</sub>), 1.80 (bs, 1H, OH), 1.59 (s, 3H, CH<sub>3</sub>). <sup>13</sup>C{<sup>1</sup>H} NMR (75.5 MHz, CDCl<sub>3</sub>) δ 159.2 (C=CH<sub>2</sub>), 153.0 (C<sub>Arom</sub>-C), 152.0 (C<sub>Arom</sub>-C), 131.1 (C<sub>Arom</sub>-C), 128.6 (2xC<sub>Arom</sub>-H), 128.2 (2xC<sub>Arom</sub>-H), 125.2 (C<sub>Arom</sub>-H), 125.1 (2xC<sub>Arom</sub>-H), 113.6 (2xC<sub>Arom</sub>-H), 111.6 (C=CH<sub>2</sub>), 74.0 (C-OH), 55.3 (OCH<sub>3</sub>), 47.2 (2xCH<sub>2</sub>), 35.8 (C-CH<sub>3</sub>), 32.4 (CH<sub>3</sub>). IR (ATR) cm<sup>-1</sup>: 3518 (O-H), 3021 (=C-H), 2949 (C-H), 1640 (C=C), 1448 (CH<sub>3</sub>). MS (EI) m/z (%): 294.2 [M<sup>+</sup>, 11], 295.2 [M<sup>+</sup>, 3], 176.1 (98), 161.1 (24), 133.1 (100), 117.1 (63). HRMS (ESI<sup>+</sup>): m/z calculated for [C<sub>20</sub>H<sub>22</sub>O<sub>2</sub>-H<sub>2</sub>O+H]<sup>+</sup> 277.1592; found 277.1594 [M-H<sub>2</sub>O+H]<sup>+</sup>.

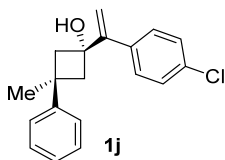

### 1-(1-(4-chlorophenyl)vinyl)-3-methyl-3-phenylcyclobutan-1-ol **1j**

The product was prepared following the general procedure D, obtaining a mixture of *cis* and *trans* diastereoisomers (308 mg, 1.034 mmol, 33 %) with a  $dr_{trans:cis} = 1.1:1$ . The *trans* isomer **1j** was isolated as a transparent oil (140 mg; 0.47 mmol; 15 %) by flash chromatography (PE:DCM = 4:6) starting from 1-(1-bromovinyl)-4-chlorobenzene **IX** (646 mg; 2.97 mmol), Mg (225 mg; 9.38 mmol), THF (15.00 mL), and 3-methyl-3-phenylcyclobutanone **I** (570 mg; 3.125 mmol).  $R_f = 0.4$  (PE:DCM = 4:6).  $^1\text{H NMR}$  (300 MHz,  $\text{CDCl}_3$ )  $\delta$  7.44 (d,  $J = 8.7$  Hz, 2H,  $\text{C}_{\text{Arom-H}}$ ), 7.37 – 7.27 (m, 4H,  $\text{C}_{\text{Arom-H}}$ ), 7.24 – 7.14 (m, 3H,  $\text{C}_{\text{Arom-H}}$ ), 5.28 (s, 1H,  $\text{C}=\text{CH}_a\text{H}_b$ ), 5.26 (s, 1H,  $\text{C}=\text{CH}_a\text{H}_b$ ), 2.92 – 2.80 (m, 2H,  $\text{C}^1\text{H}_2$ ), 2.60 – 2.44 (m, 2H,  $\text{C}^2\text{H}_2$ ), 1.99 (s, 1H, OH), 1.70 (s, 3H,  $\text{CH}_3$ ).  $^{13}\text{C}\{^1\text{H}\}$  NMR (75.5 MHz,  $\text{CDCl}_3$ )  $\delta$  152.7 ( $\text{C}=\text{CH}_2$ ), 151.6 ( $\text{C}_{\text{Arom-C}}$ ), 137.3 ( $\text{C}_{\text{Arom-C}}$ ), 133.5 ( $\text{C}_{\text{Arom-C}}$ ), 128.8 (2x $\text{C}_{\text{Arom-H}}$ ), 128.3 (2x $\text{C}_{\text{Arom-H}}$ ), 128.2 (2x $\text{C}_{\text{Arom-H}}$ ), 125.4 ( $\text{C}_{\text{Arom-H}}$ ), 125.1 (2x $\text{C}_{\text{Arom-H}}$ ), 113.5 ( $\text{C}=\text{CH}_2$ ), 73.8 ( $\text{C-OH}$ ), 47.0 (2x $\text{CH}_2$ ), 35.8 ( $\text{CCH}_3$ ), 32.5 ( $\text{CH}_3$ ). IR (ATR)  $\text{cm}^{-1}$ : 3567 (O-H), 3030 (=C-H), 2952 (C-H), 1643 (C=C), 1439 ( $\text{CH}_3$ ). MS (EI)  $m/z$  (%): 145.1 (65), 137 (14), 118 (100). HRMS (ESI $^+$ ):  $m/z$  calculated for  $[\text{C}_{19}\text{H}_{19}\text{ClO}-\text{H}_2\text{O}+\text{H}]^+$  281.1097; found 281.1089  $[\text{M}-\text{H}_2\text{O}+\text{H}]^+$ .

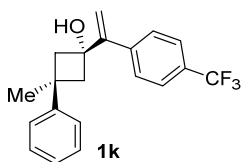

### 3-methyl-3-phenyl-1-(1-(4-(trifluoromethyl)phenyl)vinyl)cyclobutan-1-ol **1k**

The product was prepared following the general procedure D, obtaining a mixture of *cis* and *trans* diastereoisomers (221 mg; 0.67 mmol; 36%) with a  $dr_{trans:cis} = 3.3:1$ . The *trans* isomer **1k** was isolated as a yellow oil (156 mg; 0.47 mmol; 25 %) by flash chromatography (PE:DCM = 8:2 to 7:3 to 1:1) starting from 1-(1-bromovinyl)-4-(trifluoromethyl)benzene **XII** (610 mg; 2.43 mmol), Mg (136 mg; 5.61 mmol), THF (9 mL), and 3-methyl-3-phenylcyclobutan-1-one **I** (300 mg; 1.87 mmol).  $R_f = 0.25$  (PE:DCM = 70:30).  $^1\text{H NMR}$  (300 MHz,  $\text{CDCl}_3$ )  $\delta$  7.48 (s, 4H,  $\text{C}_{\text{Arom-H}}$ ), 7.24–7.15 (m, 2H,  $\text{C}_{\text{Arom-H}}$ ), 7.10–7.00 (m, 3H,  $\text{C}_{\text{Arom-H}}$ ), 5.22 (d,  $J = 1.4$  Hz, 2H,  $\text{C}=\text{CH}_2$ ), 2.75 (d,  $J = 13.4$  Hz, 2H,  $\text{C}^1\text{H}_2$ ), 2.41 (d,  $J = 13.4$  Hz, 2H,  $\text{C}^2\text{H}_2$ ), 1.87 (s, 1H, OH), 1.58 (s, 3H,  $\text{CH}_3$ ).  $^{19}\text{F NMR}$  (282 MHz,  $\text{CDCl}_3$ )  $\delta$  –62.5.  $^{13}\text{C}\{^1\text{H}\}$  NMR (75.5 MHz,  $\text{CDCl}_3$ )  $\delta$  152.7

(C=CH<sub>2</sub>), 151.4 (C<sub>Arom</sub>-C), 142.5 (C<sub>Arom</sub>-C), 129.5 (q,  $J_{C-F}$  = 32.3 Hz, C<sub>Arom</sub>-CF<sub>3</sub>), 128.2 (2xC<sub>Arom</sub>-H), 127.7 (2xC<sub>Arom</sub>-H), 125.4 (C<sub>Arom</sub>-H), 125.1 (2xC<sub>Arom</sub>-H), 125.0 (q,  $J_{C-F}$  = 3.8 Hz, 2xC<sub>Arom</sub>-H), 124.0 (q,  $J_{C-F}$  = 272.0 Hz, CF<sub>3</sub>), 114.6 (C=CH<sub>2</sub>), 73.7 (C-OH), 47.0 (2xCH<sub>2</sub>), 35.8 (CCH<sub>3</sub>), 32.5 (CH<sub>3</sub>). **IR** (ATR) cm<sup>-1</sup>: 3416 (O-H), 2953 (C-H), 2927 (C-H), 1616 (C=C). **MS** (EI) m/z (%): 314.1 (M-H<sub>2</sub>O, 100). **HRMS** (ESI<sup>+</sup>): m/z calculated for [C<sub>20</sub>H<sub>19</sub>OF<sub>3</sub>-H<sub>2</sub>O+H]<sup>+</sup> 315.1361; found 315.1353 [M-H<sub>2</sub>O+H]<sup>+</sup>.

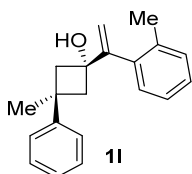

### 3-methyl-3-phenyl-1-(1-(o-tolyl)vinyl)cyclobutan-1-ol **11**

The product was prepared following the general procedure D, obtaining a mixture of *cis* and *trans* diastereoisomers (364 mg; 1.31 mmol; 70%) with a  $dr_{trans:cis}$  = 1.7:1. The *trans* isomer **11** was isolated as a transparent oil (0.46 mmol; 129 mg; 25 %) by flash chromatography (PE:DCM = 6:4 to 1:1) starting from 1-(1-bromovinyl)-2-methylbenzene **XIV** (479 mg; 2.43 mmol), Mg (136 mg; 5.61 mmol), THF (10 mL), and 3-methyl-3-phenylcyclobutanone **I** (300 mg; 1.87 mmol).  $R_f$  = 0.36 (PE:DCM = 60:40). **<sup>1</sup>H NMR** (300 MHz, CDCl<sub>3</sub>)  $\delta$  7.32–7.24 (m, 2H, C<sub>Arom</sub>-H), 7.21–7.09 (m, 7H, C<sub>Arom</sub>-H), 5.37 (d,  $J$  = 1.0 Hz, 1H, C=CH<sub>a</sub>H<sub>b</sub>), 4.92 (d,  $J$  = 1.0 Hz, 1H, C=CH<sub>a</sub>H<sub>b</sub>), 2.87 (dd,  $J$  = 13.4, 2.6 Hz, 2H, C<sup>1</sup>H<sub>2</sub>), 2.34 (dd,  $J$  = 13.4, 2.6 Hz, 2H, C<sup>2</sup>H<sub>2</sub>), 2.20 (s, 3H, C<sub>Arom</sub>-CH<sub>3</sub>), 1.82 (s, 1H, OH), 1.63 (s, 3H, CH<sub>3</sub>). **<sup>13</sup>C{<sup>1</sup>H} NMR** (75.5 MHz, CDCl<sub>3</sub>)  $\delta$  153.5 (C=CH<sub>2</sub>), 151.7 (C<sub>Arom</sub>-C), 139.4 (C<sub>Arom</sub>-C), 136.2 (C<sub>Arom</sub>-C), 130.3 (C<sub>Arom</sub>-H), 128.8 (C<sub>Arom</sub>-H), 128.2 (2xC<sub>Arom</sub>-H), 127.3 (C<sub>Arom</sub>-H), 125.3 (C<sub>Arom</sub>-H), 125.2 (C<sub>Arom</sub>-H), 125.1 (2xC<sub>Arom</sub>-H), 113.8 (C=CH<sub>2</sub>), 74.2 (C-OH), 47.2 (2xCH<sub>2</sub>), 35.6 (C-CH<sub>3</sub>), 32.2 (C<sub>Arom</sub>-CH<sub>3</sub>), 20.5 (CH<sub>3</sub>). **IR** (ATR) cm<sup>-1</sup>: 3416 (O-H), 2951 (C-H), 2924 (C-H), 1600 (C=C). **MS** (EI) m/z (%): 260 (M-H<sub>2</sub>O, 6), 145 (23), 117 (100). **HRMS** (ESI<sup>+</sup>): m/z calculated for [C<sub>20</sub>H<sub>22</sub>O-H<sub>2</sub>O+H]<sup>+</sup> 261.1643; found 261.1635 [M-H<sub>2</sub>O+H]<sup>+</sup>.

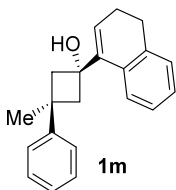

### 1-(3,4-dihydronaphthalen-1-yl)-3-methyl-3-phenylcyclobutan-1-ol **1m**

The product was prepared following the general procedure D, obtaining a mixture of *cis* and *trans* diastereoisomers (364 mg, 1.245 mmol, 81 %) with a  $dr_{trans:cis} = 1.4:1$ . The *trans* isomer **1m** was isolated as a transparent oil (184 mg; 0.63 mmol; 41 %) by flash chromatography (PE:DCM = 4:6) starting from 4-bromo-1,2-dihydronaphthalene **XIII** (306 mg; 1.47 mmol), Mg (111 mg; 4.64 mmol), THF (7.70 mL), and 3-methyl-3-phenylcyclobutanone **I** (250 mg; 1.55 mmol).  $R_f = 0.3$  (PE:DCM = 1:1). **<sup>1</sup>H NMR** (300 MHz, CDCl<sub>3</sub>)  $\delta$  7.71 (d,  $J = 7.3$  Hz, 1H, C<sub>Arom</sub>-H), 7.48 – 7.34 (m, 2H, C<sub>Arom</sub>-H), 7.32 – 7.19 (m, 6H, C<sub>Arom</sub>-H), 6.10 (t,  $J = 4.7$  Hz, 1H, C=CH), 3.15 – 3.04 (app dd,  $J = 13.3, 2.4$  Hz, 2H, C<sup>1</sup>H<sub>2</sub>), 2.85 – 2.66 (m, 4H, C<sup>2</sup>H<sub>2</sub> and C<sub>Arom</sub>CH<sub>2</sub>), 2.38 – 2.15 (m, 2H, C<sub>Arom</sub>-CH<sub>2</sub>CH<sub>2</sub> and -OH), 1.83 (s, 3H, CH<sub>3</sub>). **<sup>13</sup>C{<sup>1</sup>H} NMR** (75.5 MHz, CDCl<sub>3</sub>)  $\delta$  152.0 (C<sub>Arom</sub>-C), 141.5 (C=CH), 137.4 (C<sub>Arom</sub>-C), 132.3 (C<sub>Arom</sub>-C), 128.2 (2xC<sub>Arom</sub>-H), 127.9 (C<sub>Arom</sub>-H), 126.9 (C<sub>Arom</sub>-H), 126.2 (C<sub>Arom</sub>-H), 125.6 (C<sub>Arom</sub>-H), 125.3 (2xC<sub>Arom</sub>-H), 125.2 (C<sub>Arom</sub>-H), 73.4 (C-OH), 47.6 (2xCH<sub>2</sub>), 36.4 (C-CH<sub>2</sub>), 32.7 (CH<sub>3</sub>), 28.2 (C<sub>Arom</sub>-CH<sub>2</sub>), 23.0 (C<sub>Arom</sub>-CH<sub>2</sub>CH<sub>2</sub>). **IR** (ATR) cm<sup>-1</sup>: 3562 (O-H), 3022 (=C-H), 2954 (C-H), 1635 (C=C), 1437 (CH<sub>3</sub>). **MS** (EI)  $m/z$  (%): 172.1 (90), 154.1 (41), 128 (100). **HRMS** (ESI<sup>+</sup>):  $m/z$  calculated for [C<sub>21</sub>H<sub>22</sub>O-H<sub>2</sub>O+H]<sup>+</sup> 273.1643; found 273.1644 [M-H<sub>2</sub>O+H]<sup>+</sup>.

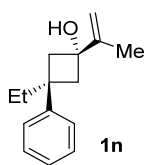

### 3-ethyl-3-phenyl-1-(prop-1-en-2-yl)cyclobutan-1-ol **1n**

The product was prepared following the procedure E, obtaining a mixture of *cis* and *trans* diastereoisomers (242 mg; 1.12 mmol; 65%) with a  $dr_{trans:cis} = 1.1:1$ . The *trans* isomer **1n** was obtained as a transparent oil (126 mg; 0.58 mmol; 34%) by flash chromatography (PE:DCM 7:3) starting from isopropenylmagnesium bromide (5.2 mL, 0.5 M in THF), THF (1.25 mL) and 3-ethyl-3-phenylcyclobutanone **II** (300 mg, 1.72 mmol).  $R_f = 0.29$  (PE:DCM = 6:4). **<sup>1</sup>H NMR** (300 MHz, CDCl<sub>3</sub>)  $\delta$  7.33–7.24 (m, 2H, C<sub>Arom</sub>-H), 7.19–7.09 (m, 3H, C<sub>Arom</sub>-H), 4.84 (s, 1H, C=CH<sub>a</sub>H<sub>b</sub>), 4.73 (t,  $J = 1.4$  Hz, 1H, C=CH<sub>a</sub>H<sub>b</sub>), 2.74 (d,  $J = 13.5$  Hz, 2H, C<sup>1</sup>H<sub>2</sub>), 2.32 (d,  $J = 13.5$  Hz, 2H, C<sup>2</sup>H<sub>2</sub>), 2.01 (q,  $J = 7.3$  Hz, 2H, CH<sub>2</sub>-CH<sub>3</sub>), 1.70 (s, 3H, CH<sub>3</sub>), 0.65 (t,  $J = 7.3$  Hz, 3H, CH<sub>2</sub>-CH<sub>3</sub>). **<sup>13</sup>C{<sup>1</sup>H} NMR** (75.5 MHz, CDCl<sub>3</sub>)  $\delta$  149.2 (C<sub>Arom</sub>-C), 148.9 (C=CH<sub>2</sub>), 127.7 (2xC<sub>Arom</sub>-H), 126.3 (2xC<sub>Arom</sub>-H), 125.2 (C<sub>Arom</sub>-H), 109.7 (C=CH<sub>2</sub>), 74.1 (C-OH), 44.2 (2xCH<sub>2</sub>), 39.2 (CCH<sub>2</sub>CH<sub>3</sub>), 36.9 (CH<sub>2</sub>-CH<sub>3</sub>), 17.4 (CH<sub>3</sub>), 8.7 (CH<sub>2</sub>-CH<sub>3</sub>). **IR** (ATR) cm<sup>-1</sup>: 3364 (O-H), 2967 (C-H), 2929 (C-H),



1600 (C=C). MS (EI) m/z (%): 198 (M-H<sub>2</sub>O, 10), 169 (30), 117 (100). HRMS (ESI<sup>+</sup>): m/z calculated for [C<sub>15</sub>H<sub>20</sub>O-H<sub>2</sub>O+H]<sup>+</sup> 199.1487; found 199.1485 [M-H<sub>2</sub>O+H]<sup>+</sup>.

### Synthesis and characterization of products 3a-3n.

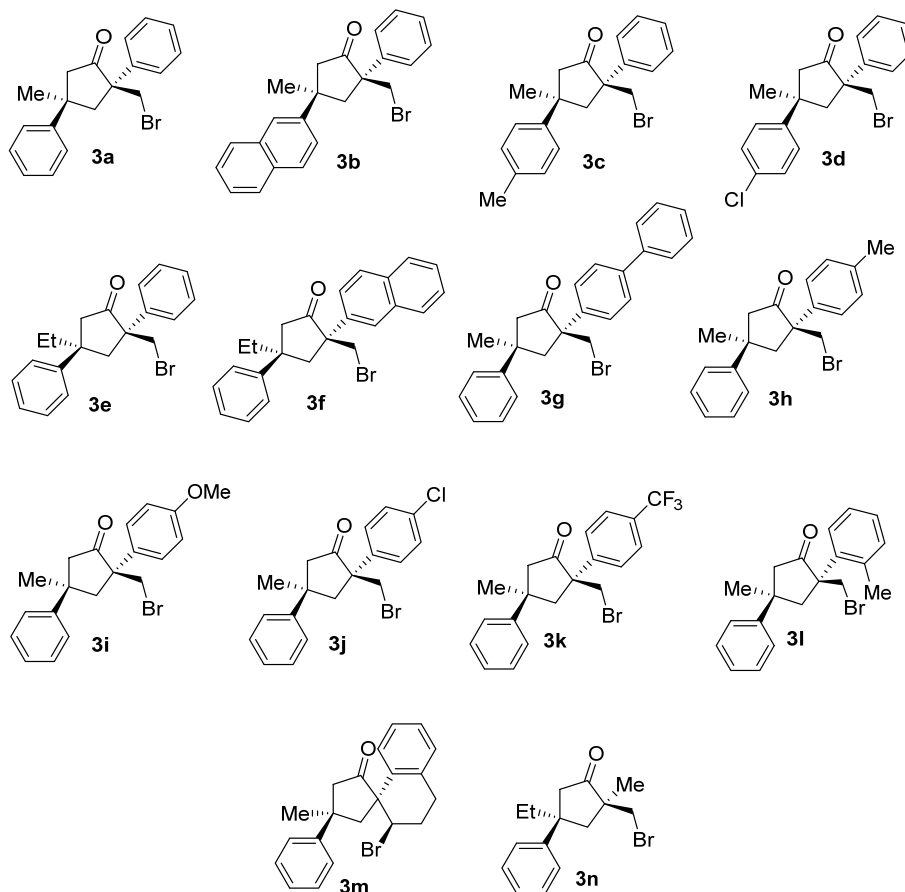

**Figure S 5.** Synthesized d 2,2,3,3-tetrasubstitutedcyclopentanones **3a-3n**.

All compounds were prepared according to the general procedure F.

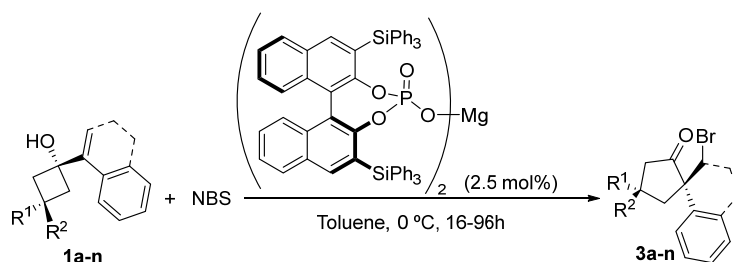

**Scheme S 8.** General procedure for the synthesis of 2,2,3,3-tetrasubstitutedcyclopentanones **3a-3n**.

#### General procedure F for the synthesis of 2,2,3,3-tetrasubstitutedcyclopentanones.

To a cold solution, 0 °C, of (1*r*,3*r*)-3-methyl-3-phenyl-1-(1-phenylvinyl)cyclobutan-1-ol **1a** (26.4 mg, 0.1 mmol) and magnesium 2,6-bis(triphenylsilyl)dinaphtho[2,1-d:1',2'-f][1,3,2]dioxaphosphin-4-olate 4-oxide **2b** (4.3 mg; 0.0025 mmol) in toluene (0.50 mL)

under Ar atmosphere, *N*-bromosuccinimide (1.1 equiv., 19.6 mg, 0.11 mmol) was added in one portion. The mixture was let stirring at 0 °C for 16-96 h until full conversion by TLC. Once the reaction was finished, aq. std. Na<sub>2</sub>S<sub>2</sub>O<sub>3</sub> (1 mL) was added, the layers were separated and the aqueous layer was extracted with Et<sub>2</sub>O (3 x 2 mL), dried with Na<sub>2</sub>SO<sub>4</sub>, filtered and concentrated under vacuum. The crude was purified by a short plug of silica gel column using PE:EtOAc 9:1.

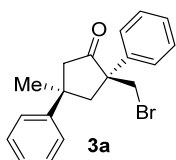

(2*R*-4*R*)-2-(bromomethyl)-4-methyl-2,4-diphenylcyclopentan-1-one **3a**

Following the general procedure F, **3a** was isolated as a colorless oil (32.7 mg; 0.095 mmol; 95 %; dr>20:1; 92 %ee) by flash chromatography (PE:EtOAc 9:1), starting from 3-methyl-3-phenyl-1-(1-phenylvinyl)cyclobutan-1-ol (26.4 mg; 0.10 mmol) and **2b** (4.3 mg; 0.0025 mmol) in toluene (0.05 mmol) and NBS (19.6 mg; 0.11 mmol). The enantiomeric excess of product was determined by HPLC using Chiralpack OD-3 column [Hexane: *i*PrOH 99:1; flow = 1 mL/min; *t*<sub>major</sub> = 13.1 min.; *t*<sub>minor</sub> = 20.4 min.]. [ $\alpha$ ]<sub>D</sub><sup>25</sup> = +21.1 (*c* = 0.5, CHCl<sub>3</sub>). **Rf** = 0.36 (PE:EtOAc = 95:5) **<sup>1</sup>H NMR** (300 MHz, CDCl<sub>3</sub>)  $\delta$  7.61–7.55 (m, 2H, C<sub>Arom</sub>-H), 7.46–7.22 (m, 8H, C<sub>Arom</sub>-H), 3.64 (d, *J* = 10.1 Hz, 1H, CH<sub>a</sub>H<sub>b</sub>Br), 3.47 (d, *J* = 10.1 Hz, 1H, CH<sub>a</sub>H<sub>b</sub>Br), 3.09 (d, *J* = 13.6 Hz, 1H, C<sup>1</sup>H<sub>a</sub>H<sub>b</sub>), 3.03 (dd, *J* = 13.6, 1.7 Hz, 1H, C<sup>1</sup>H<sub>a</sub>H<sub>b</sub>), 2.90 (d, *J* = 18.3 Hz, 1H, C<sup>2</sup>H<sub>a</sub>H<sub>b</sub>), 2.73 (dd, *J* = 18.3, 1.7 Hz, 1H, C<sup>2</sup>H<sub>a</sub>H<sub>b</sub>), 1.12 (s, 3H, CH<sub>3</sub>). **<sup>13</sup>C{<sup>1</sup>H} NMR** (75.5 MHz, CDCl<sub>3</sub>)  $\delta$  216.2 (C=O), 149.0 (C<sub>Arom</sub>-C), 140.1 (C<sub>Arom</sub>-C), 128.9 (2xC<sub>Arom</sub>-H), 128.7 (2xC<sub>Arom</sub>-H), 127.8 (C<sub>Arom</sub>-H), 126.6 (2xC<sub>Arom</sub>-H), 126.4 (C<sub>Arom</sub>-H), 125.3 (2xC<sub>Arom</sub>-H), 57.9 (C-CH<sub>2</sub>Br), 52.9 (C<sup>1</sup>H<sub>2</sub>), 45.6 (C<sup>2</sup>H<sub>2</sub>), 41.1 (CCH<sub>2</sub>), 40.9 (CH<sub>2</sub>Br), 31.2 (CH<sub>3</sub>). **IR** (ATR) cm<sup>-1</sup>: 3020 (=C-H), 2958 (C-H), 1739 (C=O), 1643 (C=C). **MS** (EI) *e/z* (%): 263.2 (34), 205.1 (25), 145.1 (39), 117.1 (100). **HRMS** (ESI<sup>+</sup>): *m/z* calculated for [C<sub>19</sub>H<sub>19</sub>OBr+Na]<sup>+</sup> 365.0517; found 365.0507 [M+Na]<sup>+</sup>.

**Bigger scale:** Following the general procedure F, **3a** was isolated as a colorless oil (336.2 mg; 0.98 mmol; 98 %; dr>20:1; 92 %ee) starting from 3-methyl-3-phenyl-1-(1-phenylvinyl)cyclobutan-1-ol (264 mg; 1.00 mmol) and **2b** (43 mg; 0.025 mmol) in toluene (0.5 mmol) and NBS (196 mg; 1.10 mmol).

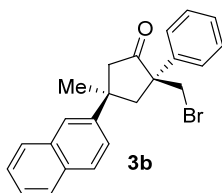

(2*R*,4*R*)-2-(bromomethyl)-4-methyl-4-(naphthalen-1-yl)-2-phenylcyclopentan-1-one **3b**

Following the general procedure F, **3b** was isolated as a white solid (35.4 mg; 0.090 mmol; 90 %; dr>20:1; 92 %ee) by flash chromatography (PE:EtOAc 95:5), starting from 3-methyl-3-(naphthalen-1-yl)-1-(1-phenylvinyl)cyclobutan-1-ol **1b** (31.4 mg; 0.10 mmol) and **2b** (4.3 mg; 0.0025 mmol) in toluene (0.50 mL) and NBS (19.6 mg; .011 mmol). The enantiomeric excess of product was determined by HPLC using Chiralpack OD-3 column [Hexane: *i*PrOH 99:1; flow = 1 mL/min.;  $t_{r\text{major}}$  = 12.1 min.;  $t_{r\text{minor}}$  = 14.4 min.].  $[\alpha]_{\text{D}}^{24}$  = +27.6 ( $c$  = 0.4, CHCl<sub>3</sub>). **Rf** = 0.43 (PE:EtOAc = 95:5). **M.p.** = 115-118 °C. **<sup>1</sup>H NMR** (300 MHz, CDCl<sub>3</sub>)  $\delta$  7.92 – 7.81 (m, 3H, C<sub>Arom</sub>-H), 7.76 (d,  $J$  = 1.8 Hz, 1H, C<sub>Arom</sub>-H), 7.65 – 7.58 (m, 2H, C<sub>Arom</sub>-H), 7.58 – 7.47 (m, 3H, C<sub>Arom</sub>-H), 7.46 – 7.37 (m, 2H, C<sub>Arom</sub>-H), 7.34 (dt,  $J$  = 5.0, 2.0 Hz, 1H, C<sub>Arom</sub>-H), 3.65 (d,  $J$  = 10.1 Hz, 1H, CH<sub>a</sub>H<sub>b</sub>Br), 3.49 (d,  $J$  = 10.1 Hz, 1H, CH<sub>a</sub>H<sub>b</sub>Br), 3.21 (d,  $J$  = 13.7 Hz, 1H, C<sup>1</sup>H<sub>a</sub>H<sub>b</sub>), 3.12 (dd,  $J$  = 13.7, 1.9 Hz, 1H, C<sup>1</sup>H<sub>a</sub>H<sub>b</sub>), 3.02 (d,  $J$  = 18.3 Hz, 1H, C<sup>2</sup>H<sub>a</sub>H<sub>b</sub>), 2.83 (dd,  $J$  = 18.3, 1.9 Hz, 1H, C<sup>2</sup>H<sub>a</sub>H<sub>b</sub>), 1.22 (s, 3H, CH<sub>3</sub>). **<sup>13</sup>C{<sup>1</sup>H} NMR** (75.5 MHz, CDCl<sub>3</sub>)  $\delta$  216.07 (C=O), 146.18 (C<sub>Arom</sub>-C), 140.13 (C<sub>Arom</sub>-C), 133.30 (C<sub>Arom</sub>-C), 132.05 (C<sub>Arom</sub>-C), 128.94 (2xC<sub>Arom</sub>-H), 128.56 (C<sub>Arom</sub>-H), 127.92 (C<sub>Arom</sub>-H), 127.78 (C<sub>Arom</sub>-H), 127.51 (C<sub>Arom</sub>-H), 126.66 (2x C<sub>Arom</sub>-H), 126.33 (C<sub>Arom</sub>-H), 125.84 (C<sub>Arom</sub>-H), 124.31 (C<sub>Arom</sub>-H), 123.30 (C<sub>Arom</sub>-H), 58.03 (CCH<sub>2</sub>Br), 52.96 (C<sup>1</sup>H<sub>2</sub>), 45.52 (C<sup>2</sup>H<sub>2</sub>), 41.20 (CH<sub>2</sub>), 40.90 (CH<sub>2</sub>Br), 31.07 (CH<sub>3</sub>). **IR** (ATR) cm<sup>-1</sup>: 3022 (=C-H), 2956 (C-H), 1739 (C=O), 1456 (CH<sub>2</sub>), 1446 (CH<sub>3</sub>). **MS** (EI)  $m/z$  (%): 392.1 (M<sup>+</sup>, 4), 195.1 (55), 168.1 (88), 152.1 (75), 128.1 (59), 117.1 (100). **HRMS** (ESI<sup>+</sup>):  $m/z$  calculated for [C<sub>23</sub>H<sub>21</sub>OBr+Na]<sup>+</sup> 415.0673; found 415.0669 [M+Na]<sup>+</sup>.

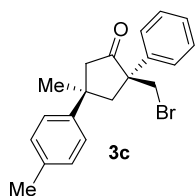

(2*R*,4*R*)-2-(bromomethyl)-4-methyl-2-phenyl-4-(p-tolyl)cyclopentan-1-one **3c**

Following the general procedure F, **3c** was isolated as a yellowish oil (31 mg; 0.09 mmol; 87 %; dr>20:1; 92 %ee) by flash chromatography (PE:EtOAc = 95:5), starting from 3-methyl-1-(1-phenylvinyl)-3-(p-tolyl)cyclobutan-1-ol **1c** (27.8 mg; 0.10 mmol) and **2b**

(4.3 mg; 0.0025 mmol) in toluene (0.5 mL) and NBS (19.6 mg; 0.11 mmol). The enantiomeric excess of product was determined by HPLC using Chiralpack OD3 column [Hexane: *i*PrOH 99:1; flow = 1 mL/min;  $t_{r\text{minor}}$  = 9.9 min.;  $t_{r\text{major}}$  = 11.6 min.].  $[\alpha]_{\text{D}}^{20} = +30.2$  ( $c=1$ ,  $\text{CHCl}_3$ ). **Rf** = 0.59 (PE:EtAcO = 95:5).  $^1\text{H NMR}$  (300 MHz,  $\text{CDCl}_3$ )  $\delta$  7.52–7.46 (m, 2H,  $\text{C}_{\text{Arom-H}}$ ), 7.34–7.26 (m, 2H,  $\text{C}_{\text{Arom-H}}$ ), 7.26–7.21 (m, 1H,  $\text{C}_{\text{Arom-H}}$ ), 7.21–7.14 (m, 2H,  $\text{C}_{\text{Arom-H}}$ ), 7.14–7.07 (m, 2H,  $\text{C}_{\text{Arom-H}}$ ), 3.54 (d,  $J = 10.1$  Hz, 1H,  $\text{CH}_a\text{H}_b\text{Br}$ ), 3.37 (d,  $J = 10.1$  Hz, 1H,  $\text{CH}_a\text{H}_b\text{Br}$ ), 2.98 (d,  $J = 13.6$  Hz, 1H,  $\text{C}^1\text{H}_a\text{H}_b$ ), 2.91 (dd,  $J = 13.6$ , 1.7 Hz, 1H,  $\text{C}^1\text{H}_a\text{H}_b$ ), 2.79 (d,  $J = 18.2$  Hz, 1H,  $\text{C}^2\text{H}_a\text{H}_b$ ), 2.62 (dd,  $J = 18.2$  Hz, 1H,  $\text{C}^2\text{H}_a\text{H}_b$ ), 2.27 (s, 3H,  $\text{CH}_3\text{-C}_{\text{Ar}}$ ), 1.03 (s, 3H,  $\text{CH}_3$ ).  $^{13}\text{C}\{^1\text{H}\}$  NMR (75.5 MHz,  $\text{CDCl}_3$ )  $\delta$  216.3 (C=O), 146.0 ( $\text{C}_{\text{Arom}}$ ), 140.2 ( $\text{C}_{\text{Arom}}$ ), 136.0 ( $\text{C}_{\text{Arom}}$ ), 129.3 ( $2\times\text{C}_{\text{Arom-H}}$ ), 128.9 ( $2\times\text{C}_{\text{Arom-H}}$ ), 127.7 ( $\text{C}_{\text{Arom-H}}$ ), 126.6 ( $2\times\text{C}_{\text{Arom-H}}$ ), 125.2 ( $2\times\text{C}_{\text{Arom-H}}$ ), 58.0 (C- $\text{CH}_2\text{Br}$ ), 53.1 ( $\text{C}^1\text{H}_2$ ), 45.6 ( $\text{C}^2\text{H}_2$ ), 40.9 ( $\text{CH}_2\text{Br}$ ), 40.7 (C $\text{CH}_3$ ), 31.3 (C $\text{CH}_3$ ), 20.9 ( $\text{CH}_3$ ). **IR** (ATR)  $\text{cm}^{-1}$ : 1739 (C=O). **MS** (EI)  $e/z$  (%): 277.1 (12), 132 (43), 115 (100). **HRMS** (ESI $^+$ ):  $m/z$  calculated for  $[\text{C}_{20}\text{H}_{21}\text{OBr}+\text{Na}]^+$  379.0673; found 379.0672  $[\text{M}+\text{Na}]^+$ .

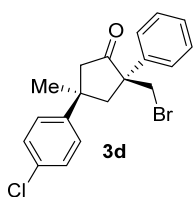

(2*R*,4*R*)-2-(bromomethyl)-4-(4-chlorophenyl)-4-methyl-2-phenylcyclopentan-1-one **3d**  
 Following the general procedure F, **3d** was isolated as a yellowish solid (35 mg; 0.09 mmol; 92 %;  $dr > 20:1$ ; 94 %ee) by FC (PE:EtOAc = 95:5), starting from (1*r*,3*r*)-3-(4-chlorophenyl)-3-methyl-1-(1-phenylvinyl)cyclobutan-1-ol **3d** (29.9 mg; 0.10 mmol) and **2b** (4.3 mg; 0.0025 mmol) in toluene (0.5 mL) and NBS (19.6 mg; 0.11 mmol). The enantiomeric excess of product was determined by HPLC using Chiralpack OD3 column [Hexane: *i*PrOH 99:1; flow = 1 mL/min;  $t_{r\text{minor}}$  = 14.9 min.;  $t_{r\text{major}}$  = 15.9 min.].  $[\alpha]_{\text{D}}^{20} = +23.2$  ( $c=1$ ,  $\text{CHCl}_3$ ). **Rf** = 0.56 (PE:EtAcO = 95:5). **M.p.** = 97.3–98.6.  $^1\text{H NMR}$  (300 MHz,  $\text{CDCl}_3$ )  $\delta$  7.59–7.52 (m, 2H,  $\text{C}_{\text{Arom-H}}$ ), 7.43–7.25 (m, 7H,  $\text{C}_{\text{Arom-H}}$ ), 3.65 (d,  $J = 10.1$  Hz, 1H,  $\text{CH}_a\text{H}_b\text{Br}$ ), 3.45 (d,  $J = 10.1$  Hz, 1H,  $\text{CH}_a\text{H}_b\text{Br}$ ), 3.05 (d,  $J = 13.6$  Hz, 1H,  $\text{C}^1\text{H}_a\text{H}_b$ ), 2.99 (d,  $J = 13.6$  Hz, 1H,  $\text{C}^1\text{H}_a\text{H}_b$ ), 2.83 (d,  $J = 18.2$  Hz, 1H,  $\text{C}^2\text{H}_a\text{H}_b$ ), 2.70 (dd,  $J = 18.2$ , 1.4 Hz, 1H,  $\text{C}^2\text{H}_a\text{H}_b$ ), 1.09 (s, 3H,  $\text{CH}_3$ ).  $^{13}\text{C}\{^1\text{H}\}$  NMR (75.5 MHz,  $\text{CDCl}_3$ )  $\delta$  215.7 (C=O), 147.6 ( $\text{C}_{\text{Arom-C}}$ ), 139.9 ( $\text{C}_{\text{Arom-C}}$ ), 132.2 ( $\text{C}_{\text{Arom-C}}$ ), 129.0 ( $2\times\text{C}_{\text{Arom-H}}$ ), 128.8 ( $2\times\text{C}_{\text{Arom-H}}$ ), 127.9 ( $\text{C}_{\text{Arom-H}}$ ), 126.8 ( $2\times\text{C}_{\text{Arom-H}}$ ), 126.6 ( $2\times\text{C}_{\text{Arom-H}}$ ), 58.0 (C- $\text{CH}_2\text{Br}$ ), 52.9 ( $\text{C}^1\text{H}_2$ ), 45.5 ( $\text{C}^2\text{H}_2$ ), 40.8 (C- $\text{CH}_3$ ), 40.7 ( $\text{CH}_2\text{Br}$ ), 31.1 ( $\text{CH}_3$ ). **IR** (ATR)

cm<sup>-1</sup>: 1741 (C=O), 1096 (C<sub>Arom</sub>-Cl). **MS** (EI) *m/z* (%): 297.1 (6), 152 (41), 115 (100). **HRMS** (ESI<sup>+</sup>): *m/z* calculated for [C<sub>19</sub>H<sub>18</sub>OClBr+Na]<sup>+</sup> 399.0127; found 399.0116 [M+Na]<sup>+</sup>.

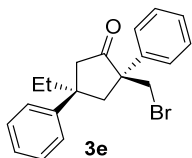

(2*R*,4*R*)-2-(bromomethyl)-4-ethyl-2,4-diphenylcyclopentan-1-one **3e**

Following the general procedure F, **3e** was isolated as a colorless oil (30 mg; 0.084 mmol; 84 %; *dr*>20:1; 93 %*ee*) starting from 3-ethyl-3-phenyl-1-(1-phenylvinyl)cyclobutan-1-ol **1e** (27.8 mg; 0.10 mmol) and **2b** (4.3 mg; 0.0025 mmol) in toluene (0.50 mL) and NBS (19.6 mg; 0.11 mmol). The enantiomeric excess of product was determined by HPLC using Chiralpack OD-3 column [Hexane: *i*PrOH 99:1; flow = 1 mL/min.; *t*<sub>minor</sub> = 11.7 min.; *t*<sub>major</sub> = 18.0 min.]. [α]<sub>D</sub><sup>24</sup> = +5.2 (*c* = 0.5, CHCl<sub>3</sub>). **Rf** = 0.48 (PE:EtOAc = 95:5). **<sup>1</sup>H NMR** (300 MHz, CDCl<sub>3</sub>) δ 7.61 – 7.54 (m, 2H, C<sub>Arom</sub>-H), 7.37 (m, 5H, C<sub>Arom</sub>-H), 7.27 (m, 3H, C<sub>Arom</sub>-H), 3.50 (d, *J* = 10.2 Hz, 1H, CH<sub>a</sub>H<sub>b</sub>Br), 3.44 (d, *J* = 10.2 Hz, 1H, CH<sub>a</sub>H<sub>b</sub>Br) 3.10 (dd, *J* = 13.7, 1.7 Hz, 1H, C<sup>1</sup>H<sub>a</sub>H<sub>b</sub>), 3.00 (d, *J* = 13.7 Hz, 1H, C<sup>1</sup>H<sub>a</sub>H<sub>b</sub>), 2.90 (d, *J* = 18.1 Hz, 1H, C<sup>2</sup>H<sub>a</sub>H<sub>b</sub>), 2.78 (dd, *J* = 18.0, 1.7 Hz, 1H, C<sup>2</sup>H<sub>a</sub>H<sub>b</sub>), 1.54 – 1.35 (m, 2H, CH<sub>2</sub>CH<sub>3</sub>), 0.46 (t, *J* = 7.3 Hz, 3H, CH<sub>2</sub>CH<sub>3</sub>). **<sup>13</sup>C {<sup>1</sup>H} NMR** (75.5 MHz, CDCl<sub>3</sub>) δ 215.9 (C=O), 146.1 (C<sub>Arom</sub>-C), 140.0 (C<sub>Arom</sub>-C), 128.8 (2xC<sub>Arom</sub>-H), 128.4 (2xC<sub>Arom</sub>-H), 127.7 (C<sub>Arom</sub>-H), 126.6 (2xC<sub>Arom</sub>-H), 126.4 (C<sub>Arom</sub>-H), 126.4 (2xC<sub>Arom</sub>), 57.3 (CCH<sub>2</sub>Br), 51.1 (C<sup>1</sup>H<sub>2</sub>), 45.1 (CCH<sub>3</sub>), 42.9 (C<sup>2</sup>H<sub>2</sub>), 41.1 (CH<sub>2</sub>Br), 35.4 (CH<sub>2</sub>CH<sub>3</sub>), 8.9 (CH<sub>2</sub>CH<sub>3</sub>). **IR** (ATR) cm<sup>-1</sup>: 3022 (=C-H), 2962 (C-H), 1738 (C=O), 1636 (C=C), 1465 (CH<sub>2</sub>), 1446 (CH<sub>3</sub>). **MS** (EI) *m/z* (%): 277.2 (22), 235.2 (16), 159.1 (20), 131.1 (42), 117.1 (100). **HRMS** (ESI<sup>+</sup>): *m/z* calculated for [C<sub>20</sub>H<sub>21</sub>OBrNa]<sup>+</sup> 379.0673; found 379.0670 [M+Na]<sup>+</sup>.

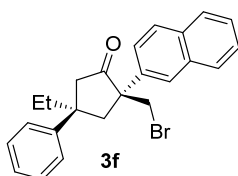

(2*R*,4*R*)-2-(bromomethyl)-4-ethyl-2-(naphthalen-2-yl)-4-phenylcyclopentan-1-one **3f**

Following the general procedure F, **3f** was isolated as a yellowish oil (31 mg; 0.08 mmol; 76 %; *dr*>20:1; 92 %*ee*) by FC (PE:EtOAc = 95:5), starting from 3-ethyl-1-(1-(naphthalen-2-yl)vinyl)-3-phenylcyclobutan-1-ol **1f** (32.8 mg; 0.10 mmol) and **2b** (4.3 mg; 0.0025 mmol) in toluene (0.5 mL) and NBS (19.6 mg; 0.11 mmol). The enantiomeric

excess of product was determined by HPLC using Chiralpack IA column [Hexane: *i*PrOH 99:1; flow = 1 mL/min;  $t_{r\text{minor}}$  = 11.4 min.;  $t_{r\text{major}}$  = 14.4 min.].  $[\alpha]_{\text{D}}^{20}$  = +35.1 ( $c=1$ , CHCl<sub>3</sub>). **Rf** = 0.47 (PE:EtOAc = 95:5). <sup>1</sup>H NMR (300 MHz, CDCl<sub>3</sub>)  $\delta$  7.94 (d,  $J$  = 1.8 Hz, 1H, C<sub>Arom</sub>-H), 7.83–7.72 (m, 3H, C<sub>Arom</sub>-H), 7.61 (dd,  $J$  = 8.7, 2.0 Hz, 1H, C<sub>Arom</sub>-H), 7.46–7.38 (m, 2H, C<sub>Arom</sub>-H), 7.34–7.26 (m, 2H, C<sub>Arom</sub>-H), 7.24–7.14 (m, 3H, C<sub>Arom</sub>-H), 3.50 (d,  $J$  = 10.2 Hz, 1H, CH<sub>a</sub>H<sub>b</sub>Br), 3.45 (d,  $J$  = 10.2 Hz, 1H, CH<sub>a</sub>H<sub>b</sub>Br), 3.16 (dd,  $J$  = 13.7, 1.7 Hz, 1H, C<sup>1</sup>H<sub>a</sub>H<sub>b</sub>), 2.99 (d,  $J$  = 13.7 Hz, 1H, C<sup>1</sup>H<sub>a</sub>H<sub>b</sub>), 2.85 (d,  $J$  = 18.1 Hz, 1H, C<sup>2</sup>H<sub>a</sub>H<sub>b</sub>), 2.75 (dd,  $J$  = 18.1, 1.7 Hz, 1H, C<sup>2</sup>H<sub>a</sub>H<sub>b</sub>), 1.40 (dq,  $J$  = 13.9, 7.3 Hz, 1H, CH<sub>a</sub>H<sub>b</sub>CH<sub>3</sub>), 1.30 (dq,  $J$  = 13.9, 7.3 Hz, 1H, CH<sub>a</sub>H<sub>b</sub>CH<sub>3</sub>), 0.35 (t,  $J$  = 7.3 Hz, 3H, CH<sub>3</sub>). <sup>13</sup>C{<sup>1</sup>H} NMR (75.5 MHz, CDCl<sub>3</sub>)  $\delta$  216.0 (C=O), 146.2 (C<sub>Arom</sub>-C), 137.3 (C<sub>Arom</sub>-C), 133.2 (C<sub>Arom</sub>-C), 132.5 (C<sub>Arom</sub>-C), 128.6 (C<sub>Arom</sub>-H), 128.4 (2xC<sub>Arom</sub>-H), 128.3 (C<sub>Arom</sub>-H), 127.5 (C<sub>Arom</sub>-H), 126.5 (C<sub>Arom</sub>-H), 126.4 (2xC<sub>Arom</sub>-H), 126.4 (2xC<sub>Arom</sub>-H), 125.8 (C<sub>Arom</sub>-H), 124.3 (C<sub>Arom</sub>-H), 57.4 (C-CH<sub>2</sub>Br), 51.1 (C<sup>1</sup>H<sub>2</sub>), 45.2 (C-CH<sub>2</sub>CH<sub>3</sub>), 43.0 (C<sup>2</sup>H<sub>2</sub>), 40.9 (CH<sub>2</sub>Br), 35.4 (CH<sub>2</sub>CH<sub>3</sub>), 8.9 (CH<sub>2</sub>CH<sub>3</sub>). IR (ATR) cm<sup>-1</sup>: 1736 (C=O). MS (EI)  $e/z$  (%): 408.1 (M+H, 7), 195.1 (45), 165 (100). HRMS (ESI<sup>+</sup>):  $m/z$  calculated for [C<sub>24</sub>H<sub>23</sub>OBr+Na]<sup>+</sup> 429.0830; found 429.0825 [M+Na]<sup>+</sup>.

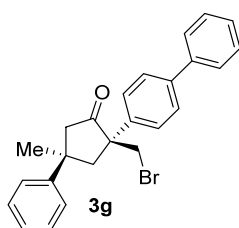

(2*R*,4*R*)-2-([1,1'-biphenyl]-4-yl)-2-(bromomethyl)-4-methyl-4-phenylcyclopentan-1-one  
**3g**

Following the general procedure F, **3g** was isolated as a amorphous white solid (41 mg; 0.10 mmol; 98 %;  $dr > 20:1$ ; 92% ee) by FC (PE:EtOAc = 95:5), starting from 1-(1-([1,1'-biphenyl]-4-yl)vinyl)-3-methyl-3-phenylcyclobutan-1-ol **1g** (34 mg; 0.10 mmol) and **2b** (4.3 mg; 0.0025 mmol) in toluene (0.5 mL) and NBS (19.6 mg; 0.11 mmol). The enantiomeric excess of product was determined by HPLC using Chiralpack IA column [Hexane: *i*PrOH 99:1; flow = 1 mL/min;  $t_{r\text{minor}}$  = 17.7 min.;  $t_{r\text{major}}$  = 35.4 min.].  $[\alpha]_{\text{D}}^{20}$  = +44.9 ( $c=1$ , CHCl<sub>3</sub>). **Rf** = 0.37 (PE:EtAcO = 95:5). <sup>1</sup>H NMR (300 MHz, CDCl<sub>3</sub>)  $\delta$  7.71–7.58 (m, 6H, C<sub>Arom</sub>-H), 7.52–7.30 (m, 8H, C<sub>Arom</sub>-H), 3.68 (d,  $J$  = 10.2 Hz, 1H, CH<sub>a</sub>H<sub>b</sub>Br), 3.51 (d,  $J$  = 10.2 Hz, 1H, CH<sub>a</sub>H<sub>b</sub>Br), 3.13 (d,  $J$  = 13.8 Hz, 1H, C<sup>1</sup>H<sub>a</sub>H<sub>b</sub>), 3.07 (dd,  $J$  = 13.8 Hz, 1H, C<sup>1</sup>H<sub>a</sub>H<sub>b</sub>), 2.93 (d,  $J$  = 18.2 Hz, 1H, C<sup>2</sup>H<sub>a</sub>H<sub>b</sub>), 2.76 (dd,  $J$  = 18.2 Hz, 1H, C<sup>2</sup>H<sub>a</sub>H<sub>b</sub>), 1.18 (s, 3H, CH<sub>3</sub>). <sup>13</sup>C{<sup>1</sup>H} NMR (75.5 MHz, CDCl<sub>3</sub>)  $\delta$  216.2 (C=O), 149.0

(C<sub>Arom</sub>-C), 140.5 (C<sub>Arom</sub>-C), 140.2 (C<sub>Arom</sub>-C), 139.1 (C<sub>Arom</sub>-C), 128.8 (2xC<sub>Arom</sub>-H), 128.7 (2xC<sub>Arom</sub>-H), 127.6 (C<sub>Arom</sub>-H), 127.5 (2xC<sub>Arom</sub>-H), 127.1 (2xC<sub>Arom</sub>-H), 127.0 (2xC<sub>Arom</sub>-H), 126.5 (C<sub>Arom</sub>-H), 125.4 (2xC<sub>Arom</sub>-H), 57.7 (C-CH<sub>2</sub>Br), 53.0 (C<sup>1</sup>H<sub>2</sub>), 45.5 (C<sup>2</sup>H<sub>2</sub>), 41.1 (CCH<sub>3</sub>), 40.9 (CH<sub>2</sub>Br), 31.4 (CH<sub>3</sub>) **IR** (ATR) cm<sup>-1</sup>: 1738 (C=O). **MS** (EI) e/z (%): 418.1 (M, 3), 338.1 (5), 221 (11), 178 (100). **HRMS** (ESI<sup>+</sup>): m/z calculated for [C<sub>25</sub>H<sub>23</sub>OBr+Na]<sup>+</sup> 441.0830; found 441.0830 [M+Na]<sup>+</sup>.

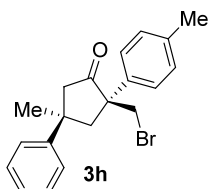

(2*R*,4*R*)-2-(bromomethyl)-4-methyl-4-phenyl-2-(*p*-tolyl)cyclopentan-1-one **3h**

Following the general procedure F, **3h** was isolated as a colorless oil (28.2 mg; 0.079 mmol; 79 %; dr>20:1; 93 %ee) starting from 3-methyl-3-phenyl-1-(1-(*p*-tolyl)vinyl)cyclobutan-1-ol **1h** (27.8 mg; 0.10 mmol) and **2b** (4.3 mg; 0.0025 mmol) in Toluene (0.50 mL) and NBS (19.6 mg; 0.11 mmol). The enantiomeric excess of product was determined by HPLC using Chiralpack OD-3 column [Hexane: *i*PrOH 99:1; flow = 1 mL/min.; tr<sub>major</sub> = 12.0 min.; tr<sub>minor</sub> = 16.8 min.]. [α]<sub>D</sub><sup>25</sup> = +11.9 (c = 0.7, CHCl<sub>3</sub>). **Rf** = 0.39 (PE:EtOAc = 95:5). **<sup>1</sup>H NMR** (300 MHz, CDCl<sub>3</sub>) δ 7.45 (d, *J* = 8.3 Hz, 2H, C<sub>Arom</sub>-H), 7.43–7.33 (m, 4H, C<sub>Arom</sub>-H), 7.31–7.23 (m, 1H, C<sub>Arom</sub>-H), 7.20 (d, *J* = 8.0 Hz, 2H, C<sub>Arom</sub>-H), 3.63 (d, *J* = 10.1 Hz, 1H, CH<sub>a</sub>H<sub>b</sub>Br), 3.45 (d, *J* = 10.1 Hz, 1H, CH<sub>a</sub>H<sub>b</sub>Br), 3.07 (d, *J* = 13.6 Hz, 1H, C<sup>1</sup>H<sub>a</sub>H<sub>b</sub>), 3.01 (dd, *J* = 13.6, 1.7 Hz, 1H, C<sup>1</sup>H<sub>a</sub>H<sub>b</sub>), 2.88 (d, *J* = 18.3 Hz, 1H, C<sup>2</sup>H<sub>a</sub>H<sub>b</sub>), 2.72 (dd, *J* = 18.3, 1.7 Hz, 1H, C<sup>2</sup>H<sub>a</sub>H<sub>b</sub>), 2.36 (s, 3H, C<sub>Arom</sub>-CH<sub>3</sub>), 1.13 (s, 3H, CH<sub>3</sub>). **<sup>13</sup>C{<sup>1</sup>H} NMR** (75.5 MHz, CDCl<sub>3</sub>) δ 215.4 (C=O), 148.1 (C<sub>Arom</sub>-CH<sub>3</sub>), 136.5 (C<sub>Arom</sub>-C), 136.0 (C<sub>Arom</sub>-C), 128.6 (2xC<sub>Arom</sub>-H), 127.6 (2xC<sub>Arom</sub>-H), 125.5 (C<sub>Arom</sub>-H), 125.4 (2xC<sub>Arom</sub>-H), 124.3 (2xC<sub>Arom</sub>-H), 56.7 (CCH<sub>2</sub>Br), 51.9 (C<sup>1</sup>H<sub>2</sub>), 44.4 (C<sup>2</sup>H<sub>2</sub>), 40.0 (CCH<sub>2</sub>), 39.9 (CH<sub>2</sub>Br), 30.2 (C<sub>Arom</sub>-CH<sub>3</sub>), 19.9 (CH<sub>3</sub>). **IR** (ATR) cm<sup>-1</sup>: 3018 (=C-H), 2970 (C-H), 1738 (C=O), 1642 (C=C). **MS** (EI) e/z (%): 277.2 (26), 159.1 (22), 145.2 (22), 131.1 (100). **HRMS** (ESI<sup>+</sup>): m/z calculated for [C<sub>20</sub>H<sub>21</sub>OBr+Na]<sup>+</sup> 379.0673; found 379.0673 [M+Na]<sup>+</sup>.

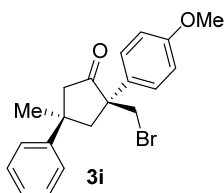

(2*R*,4*R*)-2-(bromomethyl)-2-(4-methoxyphenyl)-4-methyl-4-phenylcyclopentan-1-one  
**3i**

Following the general procedure F, **3i** was isolated as a white solid (18.3 mg; 0.049 mmol; 49 %; dr>20:1; 80 %ee) starting from 1-(1-(4-methoxyphenyl)vinyl)-3-methyl-3-phenylcyclobutan-1-ol **1i** (29.4 mg; 0.1 mmol) and **2b** (4.3 mg; 0.0025 mmol) in toluene (0.50 mL) and NBS (19.6 mg; 0.11 mmol). The enantiomeric excess of product was determined by HPLC using Chiralpack OD-3 column [Hexane: *i*PrOH 99:1; flow = 1 mL/min.;  $t_{r\text{major}}$  = 24.5 min.;  $t_{r\text{minor}}$  = 30.8 min.].  $[\alpha]_{\text{D}}^{25}$  = +13.2 ( $c$  = 0.7, CHCl<sub>3</sub>).  $R_f$  = 0.37 (PE:EtOAc = 95:5). **M.p.** = 86-88 °C. **<sup>1</sup>H NMR** (300 MHz, CDCl<sub>3</sub>)  $\delta$  7.52 – 7.46 (m, 2H, C<sub>Arom</sub>-H), 7.41 – 7.34 (m, 4H, C<sub>Arom</sub>-H), 7.30 – 7.23 (m, 1H, C<sub>Arom</sub>-H), 6.96 – 6.87 (m, 2H, C<sub>Arom</sub>-H), 3.82 (s, 3H, OCH<sub>3</sub>), 3.62 (d,  $J$  = 10.1 Hz, 1H, CH<sub>a</sub>H<sub>b</sub>Br), 3.43 (d,  $J$  = 10.1 Hz, 1H, CH<sub>a</sub>H<sub>b</sub>Br), 3.06 (d,  $J$  = 13.6 Hz, 1H, C<sup>1</sup>H<sub>a</sub>H<sub>b</sub>), 2.99 (dd,  $J$  = 13.6, 1.9 Hz, 1H, C<sup>1</sup>H<sub>a</sub>H<sub>b</sub>), 2.88 (d,  $J$  = 18.3 Hz, 1H, C<sup>2</sup>H<sub>a</sub>H<sub>b</sub>), 2.72 (dd,  $J$  = 18.3, 1.9 Hz, 1H, C<sup>2</sup>H<sub>a</sub>H<sub>b</sub>), 1.13 (s, 3H, CH<sub>3</sub>). **<sup>13</sup>C{<sup>1</sup>H} NMR** (75.5 MHz, CDCl<sub>3</sub>)  $\delta$  216.5 (C=O), 159.0 (C<sub>Arom</sub>-OCH<sub>3</sub>), 149.1 (C<sub>Arom</sub>-C), 131.9 (C<sub>Arom</sub>-C), 128.6 (2xC<sub>Arom</sub>-H), 127.8 (2xC<sub>Arom</sub>-H), 126.4 (C<sub>Arom</sub>-H), 125.3 (2xC<sub>Arom</sub>-H), 114.2 (2xC<sub>Arom</sub>-H), 57.3 (CCH<sub>2</sub>Br), 55.3 (OCH<sub>3</sub>), 53.0 (C<sup>1</sup>H<sub>2</sub>), 45.5 (C<sup>2</sup>H<sub>2</sub>), 41.0 (C-CH<sub>3</sub>), 40.9 (CH<sub>2</sub>Br), 31.2 (CH<sub>3</sub>). **IR** (ATR) cm<sup>-1</sup>: 3020 (=C-H), 2961 (C-H), 1737 (C=O), 1641 (C=C), 1472 (CH<sub>2</sub>), 1456 (CH<sub>3</sub>), 1253 (C-O). **MS** (EI)  $e/z$  (%): 147.1 (69), 133.1 (56.0), 121.1 (90), 91.1 (100). **HRMS** (ESI<sup>+</sup>):  $m/z$  calculated for [C<sub>20</sub>H<sub>21</sub>O<sub>2</sub>Br+Na]<sup>+</sup> 395.0623; found 395.0616 [M+Na]<sup>+</sup>.

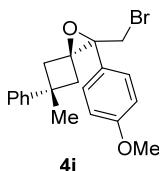

2-(bromomethyl)-2-(4-methoxyphenyl)-5-methyl-5-phenyl-1-oxaspiro[2.3]hexane **4i**

Following the general procedure F, **4i** was isolated as a colorless oil (17.5 mg; 0.047 mmol; 47 %; 81 %ee) starting from 1-(1-(4-methoxyphenyl)vinyl)-3-methyl-3-phenylcyclobutan-1-ol **1i** (29.4 mg; 0.1 mmol) and **2b** (4.3 mg; 0.0025 mmol) in toluene (0.50 mL) and NBS (19.6 mg; 0.11 mmol).  $R_f$  = 0.38 (PE:EtOAc = 95:5). **<sup>1</sup>H NMR** (300



MHz, CDCl<sub>3</sub>)  $\delta$  7.32 (dd,  $J$  = 16.0, 8.6 Hz, 3H, C<sub>Arom</sub>-H), 7.26 – 7.13 (m, 5H), 6.88 (d,  $J$  = 8.8 Hz, 2H, C<sub>Arom</sub>-H), 3.85 – 3.78 (m, 3H, OMe + 1H, CH<sub>a</sub>H<sub>b</sub>Br), 3.43 (d,  $J$  = 10.8 Hz, 1H, CH<sub>a</sub>H<sub>b</sub>Br), 3.03 (d,  $J$  = 13.1 Hz, 1H, C<sup>1</sup>H<sub>a</sub>H<sub>b</sub>), 2.60 (dt,  $J$  = 13.1, 1.9 Hz, 1H, C<sup>1</sup>H<sub>a</sub>H<sub>b</sub>), 2.55 – 2.46 (m, 1H, C<sup>2</sup>H<sub>a</sub>H<sub>b</sub>), 2.30 (d,  $J$  = 13.6 Hz, 1H, C<sup>2</sup>H<sub>a</sub>H<sub>b</sub>), 1.63 (s, 3H, CH<sub>3</sub>). <sup>13</sup>C{<sup>1</sup>H} NMR (75.5 MHz, CDCl<sub>3</sub>)  $\delta$  159.21 (C<sub>Arom</sub>-C), 149.04 (C<sub>Arom</sub>-C), 128.36 (2xC<sub>Arom</sub>-H), 127.84 (2xC<sub>Arom</sub>-H), 127.80 (C<sub>Arom</sub>-C), 125.90 (C<sub>Arom</sub>-H), 125.42 (2xC<sub>Arom</sub>-H), 113.61 (C<sub>Arom</sub>-H), 69.76 (C-CH<sub>2</sub>Br), 63.96 (C-O), 55.23 (OCH<sub>3</sub>), 42.70 (C<sup>1</sup>H<sub>2</sub>), 42.45 (C<sup>2</sup>H<sub>2</sub>), 36.83 (C-CH<sub>3</sub>), 36.12 (CH<sub>2</sub>Br), 32.14 (CH<sub>3</sub>). IR (ATR) cm<sup>-1</sup>: 3022 (=C-H), 2961 (C-H), 1612 (C=C). HRMS (ESI<sup>+</sup>):  $m/z$  calculated for [C<sub>20</sub>H<sub>21</sub>O<sub>2</sub>Br+Na]<sup>+</sup> 395.0623; found 395.0627 [M+Na]<sup>+</sup>.

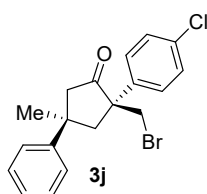

(2*R*,4*R*)-2-(bromomethyl)-2-(4-chlorophenyl)-4-methyl-4-phenylcyclopentan-1-one **3j**

Following the general procedure F, **3j** was isolated as a white solid (28.4 mg; 0.075 mmol; 75 %; dr>20:1; 95 %ee) starting from 1-(1-(4-chlorophenyl)vinyl)-3-methyl-3-phenylcyclobutan-1-ol (29.9 mg; 0.10 mmol) **1j** and **2b** (4.3 mg; 0.0025 mmol) in Toluene (0.5 L) and NBS (19.6 mg; 0.11 mmol). The enantiomeric excess of product was determined by HPLC using Chiralpack OD-3 column [Hexane: *i*PrOH 99:1; flow = 1 mL/min.;  $t_{r\text{minor}}$  = 19.0 min.;  $t_{r\text{major}}$  = 30.7 min.].  $[\alpha]_D^{26}$  = +391.2 ( $c$  = 0.1, CHCl<sub>3</sub>).  $R_f$  = 0.38 (PE:EtOAc = 95:5). **M.p.** = 124-125 °C. <sup>1</sup>H NMR (300 MHz, CDCl<sub>3</sub>)  $\delta$  7.58 – 7.51 (m, 2H, C<sub>Arom</sub>-H), 7.44 – 7.33 (m, 6H, C<sub>Arom</sub>-H), 7.31 – 7.23 (m, 1H, C<sub>Arom</sub>-H), 3.55 (d,  $J$  = 10.2 Hz, 1H, CH<sub>a</sub>H<sub>b</sub>Br), 3.42 (d,  $J$  = 10.2 Hz, 1H, CH<sub>a</sub>H<sub>b</sub>Br), 3.06 (d,  $J$  = 13.7 Hz, 1H, C<sup>1</sup>H<sub>a</sub>H<sub>b</sub>), 3.02 – 2.86 (m, 2H, C<sup>1</sup>H<sub>a</sub>H<sub>b</sub> and C<sup>2</sup>H<sub>a</sub>H<sub>b</sub>), 2.72 (dd,  $J$  = 18.1, 1.9 Hz, 1H, C<sup>2</sup>H<sub>a</sub>H<sub>b</sub>), 1.14 (s, 3H, CH<sub>3</sub>). <sup>13</sup>C{<sup>1</sup>H} NMR (75.5 MHz, CDCl<sub>3</sub>)  $\delta$  215.8 (C=O), 148.5 (C<sub>Arom</sub>-Cl), 138.6 (C<sub>Arom</sub>-C), 133.4 (C<sub>Arom</sub>-C), 129.0 (2xC<sub>Arom</sub>-H), 128.7 (2xC<sub>Arom</sub>-H), 128.1 (2xC<sub>Arom</sub>-H), 126.6 (C<sub>Arom</sub>-H), 125.3 (2xC<sub>Arom</sub>-H), 57.3 (CCH<sub>2</sub>Br), 52.8 (C<sup>1</sup>H<sub>2</sub>), 45.6 (C<sup>2</sup>H<sub>2</sub>), 41.1 (C-CH<sub>3</sub>), 40.9 (CH<sub>2</sub>Br), 31.3 (CH<sub>3</sub>). IR (ATR) cm<sup>-1</sup>: 3029 (=C-H), 2968 (C-H), 1736 (C=O), 1641 (C=C). MS (EI)  $m/z$  (%): 297.2 (44), 159.1 (30), 153.0 (34), 152.0 (15), 151.0 (100). HRMS (ESI<sup>+</sup>):  $m/z$  calculated for [C<sub>19</sub>H<sub>18</sub>OBrCl+Na]<sup>+</sup> 399.0127; found 399.0136 [M+Na]<sup>+</sup>.

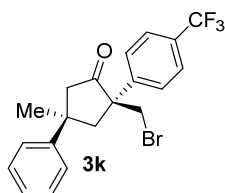

(2*R*,4*R*)-2-(bromomethyl)-4-methyl-4-phenyl-2-(4-(trifluoromethyl)phenyl)cyclopentan-1-one **3k**

Following the general procedure F, **3k** was isolated as a yellowish oil (11.4 mg; 0.03 mmol; 62 %; dr:9:1; 86 %ee) by FC (PE:EtOAc = 95:5), starting from (1*r*,3*r*)-3-methyl-3-phenyl-1-(1-(4-(trifluoromethyl)phenyl)vinyl)cyclobutan-1-ol **1k** (14.9 mg; 0.045 mmol) and **2b** (4.0 mg; 0.0022 mmol) in toluene (0.22 mL) and NBS (8.72 mg; 0.049 mmol). The enantiomeric excess of product was determined by HPLC using Chiralpack OD3 column [Hexane: *i*PrOH 99:1; flow = 1 mL/min;  $t_{\text{rminor}}$  = 22.5 min.;  $t_{\text{rmajor}}$  = 33.7 min.].  $[\alpha]_{\text{D}}^{20}$  = +20.8 ( $c=1$ , CHCl<sub>3</sub>).  $R_f$  = 0.51 (PE:EtAcO = 95:5). <sup>1</sup>H NMR (300 MHz, CDCl<sub>3</sub>)  $\delta$  7.74 (d,  $J$  = 8.6 Hz, 2H, C<sub>Arom</sub>-H), 7.64 (d,  $J$  = 8.6 Hz, 2H, C<sub>Arom</sub>-H), 7.43–7.34 (m, 4H, C<sub>Arom</sub>-H), 7.34–7.29 (m, 1H, C<sub>Arom</sub>-H), 3.53 (d,  $J$  = 10.2 Hz, 1H, CH<sub>a</sub>H<sub>b</sub>Br), 3.44 (d,  $J$  = 10.2 Hz, 1H, CH<sub>a</sub>H<sub>b</sub>Br), 3.09 (d,  $J$  = 13.8 Hz, 1H, C<sup>1</sup>H<sub>a</sub>H<sub>b</sub>), 3.02 (d,  $J$  = 13.8 Hz, 1H, C<sup>1</sup>H<sub>a</sub>H<sub>b</sub>), 2.96 (d,  $J$  = 18.2 Hz, 1H, C<sup>2</sup>H<sub>a</sub>H<sub>b</sub>), 2.72 (dd,  $J$  = 18.2, 1.7 Hz, 1H, C<sup>2</sup>H<sub>a</sub>H<sub>b</sub>), 1.14 (s, 3H, CH<sub>3</sub>). <sup>19</sup>F NMR (282 MHz, CDCl<sub>3</sub>)  $\delta$  -62.7. <sup>13</sup>C{<sup>1</sup>H} NMR (75.5 MHz, CDCl<sub>3</sub>)  $\delta$  215.4 (C=O), 148.2 (C<sub>Arom</sub>-C), 144.1 (C<sub>Arom</sub>-C), 130.0 (q,  $J_{\text{C-F}}$  = 32.5 Hz, C<sub>Arom</sub>-CF<sub>3</sub>), 128.8 (2x C<sub>Arom</sub>-H), 127.2 (2x C<sub>Arom</sub>-H), 126.7 (C<sub>Arom</sub>-H), 125.7 (q,  $J_{\text{C-F}}$  = 3.8 Hz, 2x C<sub>Arom</sub>-H), 125.3 (2x C<sub>Arom</sub>-H), 123.8 (q,  $J_{\text{C-F}}$  = 265.5 Hz, CF<sub>3</sub>), 57.6 (C-CH<sub>2</sub>Br), 52.8 (C<sup>1</sup>H<sub>2</sub>), 45.7 (C<sup>2</sup>H<sub>2</sub>), 41.1 (CCH<sub>3</sub>), 40.8 (CH<sub>2</sub>Br), 31.3 (CH<sub>3</sub>). IR (ATR) cm<sup>-1</sup>: 1740 (C=O). MS (EI)  $e/z$  (%): 331.1 (5), 289.1 (19), 185 (77), 117. (100). HRMS (ESI<sup>+</sup>):  $m/z$  calculated for [C<sub>20</sub>H<sub>18</sub>OF<sub>3</sub>Br+Na]<sup>+</sup> 433.0391; found 433.0390 [M+Na]<sup>+</sup>.

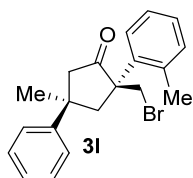

(2*R*,4*R*)-2-(bromomethyl)-4-methyl-4-phenyl-2-(*o*-tolyl)cyclopentan-1-one **3l**

Following the general procedure F, **3l** was isolated as a yellowish oil (32 mg; 0.09 mmol; 89 %; dr>20:1; 45 %ee) by FC (PE:EtOAc = 95:5), starting from 3-methyl-3-phenyl-1-(1-(*o*-tolyl)vinyl)cyclobutan-1-ol **1l** (27.8 mg; 0.10 mmol) and **2b** (4.3 mg; 0.0025 mmol) in toluene (0.5 mL) and NBS (19.6 mg; 0.11 mmol). The enantiomeric excess of product was determined by HPLC using Chiralpack OD3 column [Hexane: *i*PrOH 99.5:0.5; flow

= 0.5 mL/min;  $t_{r\text{major}} = 19.3$  min.;  $t_{r\text{minor}} = 20.5$  min.].  $[\alpha]_{\text{D}}^{20} = +20.3$  ( $c=1$ ,  $\text{CHCl}_3$ ). **Rf** = 0.56 (PE:EtAcO = 95:5).  **$^1\text{H}$  NMR** (300 MHz,  $\text{CDCl}_3$ )  $\delta$  7.14–6.95 (m, 7H,  $\text{C}_{\text{Arom-H}}$ ), 6.90–6.81 (m, 2H,  $\text{C}_{\text{Arom-H}}$ ), 3.85 (d,  $J = 10.6$  Hz, 1H,  $\text{CH}_a\text{H}_b\text{Br}$ ), 3.66 (d,  $J = 10.6$  Hz, 1H,  $\text{CH}_a\text{H}_b\text{Br}$ ), 3.08 (d,  $J = 16.4$  Hz, 1H,  $\text{C}^1\text{H}_a\text{H}_b$ ), 2.98 (s, 2H,  $\text{C}^2\text{H}_2$ ), 2.49 (d,  $J = 16.4$  Hz, 1H,  $\text{C}^1\text{H}_a\text{H}_b$ ), 2.31 (s, 3H,  $\text{C}_{\text{Arom-CH}_3}$ ), 1.43 (s, 3H,  $\text{CH}_3$ ).  **$^{13}\text{C}\{^1\text{H}\}$  NMR** (75.5 MHz,  $\text{CDCl}_3$ )  $\delta$  215.3 (C=O), 149.1 ( $\text{C}_{\text{Arom-C}}$ ), 139.5 ( $\text{C}_{\text{Arom-C}}$ ), 135.5 ( $\text{C}_{\text{Arom-C}}$ ), 133.1 ( $\text{C}_{\text{Arom-H}}$ ), 128.3 (2x $\text{C}_{\text{Arom-H}}$ ), 127.6 ( $\text{C}_{\text{Arom-H}}$ ), 126.9 ( $\text{C}_{\text{Arom-H}}$ ), 126.1 ( $\text{C}_{\text{Arom-H}}$ ), 126.0 ( $\text{C}_{\text{Arom-H}}$ ), 125.2 (2x $\text{C}_{\text{Arom-H}}$ ), 58.8 (C- $\text{CH}_2\text{Br}$ ), 51.5 ( $\text{C}^1\text{H}_2$ ), 47.7 ( $\text{C}^2\text{H}_2$ ), 40.0 (C $\text{CH}_3$ ), 36.1 ( $\text{CH}_2\text{Br}$ ), 32.0 ( $\text{C}_{\text{Arom-CH}_3}$ ), 21.7 ( $\text{CH}_3$ ). **IR** (ATR)  $\text{cm}^{-1}$ : 1741 (C=O). **MS** (EI)  $e/z$  (%): 277.1 (2), 159.1 (16), 131.0 (48), 115 (100). **HRMS** (ESI<sup>+</sup>):  $m/z$  calculated for  $[\text{C}_{20}\text{H}_{21}\text{OBr}+\text{Na}]^+$  379.0673; found 379.0671  $[\text{M}+\text{Na}]^+$ .

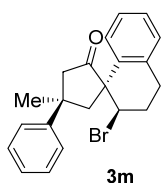

(1*R*,2'*R*,4*R*)-2'-bromo-4-methyl-4-phenyl-3',4'-dihydro-2'H-spiro[cyclopentane-1,1'-naphthalen]-2-one **3m**

Following the general procedure F, **3m** was isolated as a colorless oil (28.0 mg; 0.076 mmol; 76 %;  $dr > 20:1$ ; 90 %ee) starting from 1-(3,4-dihydronaphthalen-1-yl)-3-methyl-3-phenylcyclobutan-1-ol **1m** (29.0 mg; 0.10 mmol) and **2b** (4.3 mg; 0.0025 mmol) in toluene (0.50 mL) and NBS (19.6 mg; 0.11 mmol). The enantiomeric excess of product was determined by HPLC using Chiralpack OD-3 column [Hexane: *i*PrOH 99:1; flow = 1 mL/min.;  $t_{r\text{major}} = 16.6$  min.;  $t_{r\text{minor}} = 24.2$  min.].  $[\alpha]_{\text{D}}^{20} = +20.0$  ( $c = 0.3$ ,  $\text{CHCl}_3$ ). **Rf** = 0.38 (PE:EtOAc = 95:5).  **$^1\text{H}$  NMR** (300 MHz,  $\text{CDCl}_3$ )  $\delta$  7.47 – 7.33 (m, 4H,  $\text{C}_{\text{Arom-H}}$ ), 7.33 – 7.16 (m, 3H,  $\text{C}_{\text{Arom-H}}$ ), 7.16 – 7.06 (m, 2H,  $\text{C}_{\text{Arom-H}}$ ), 4.22 (dd,  $J = 5.6, 3.0$  Hz, 1H,  $\text{CHBr}$ ), 3.52 (d,  $J = 17.0$  Hz, 1H;  $\text{C}^1\text{H}_a\text{H}_b$ ), 3.24 (ddd,  $J = 17.1, 9.6, 6.9$  Hz, 1H,  $\text{C}_{\text{Arom-CH}_a\text{H}_b}$ ), 3.02 (d,  $J = 14.6$  Hz, 1H,  $\text{C}^2\text{H}_a\text{H}_b$ ), 2.82 (ddd,  $J = 17.1, 5.7, 4.4$  Hz, 1H,  $\text{C}_{\text{Arom-CH}_a\text{H}_b}$ ), 2.71 (d,  $J = 17.1$  Hz, 1H,  $\text{C}^1\text{H}_a\text{H}_b$ ), 2.63 (d,  $J = 14.5$  Hz, 1H,  $\text{C}^2\text{H}_a\text{H}_b$ ), 2.45 – 2.15 (m, 2H,  $\text{C}_{\text{Arom-CH}_2\text{CH}_2}$ ), 1.53 (s, 3H,  $\text{CH}_3$ ).  **$^{13}\text{C}\{^1\text{H}\}$  NMR** (75.5 MHz,  $\text{CDCl}_3$ )  $\delta$  213.5 (C=O), 149.4 ( $\text{C}_{\text{Arom-C}}$ ), 135.6 ( $\text{C}_{\text{Arom-C}}$ ), 135.5 ( $\text{C}_{\text{Arom-C}}$ ), 129.1 ( $\text{C}_{\text{Arom-H}}$ ), 128.9 ( $\text{C}_{\text{Arom-H}}$ ), 128.9 (2x $\text{C}_{\text{Arom-H}}$ ), 127.0 ( $\text{C}_{\text{Arom-H}}$ ), 126.6 ( $\text{C}_{\text{Arom-H}}$ ), 126.6 ( $\text{C}_{\text{Arom-H}}$ ), 125.2 (2x $\text{C}_{\text{Arom-H}}$ ), 59.1 (C- $\text{CHBr}$ ), 55.3 ( $\text{C}^1\text{H}_2$ ), 54.9 ( $\text{CHBr}$ ), 51.2 ( $\text{C}^2\text{H}_2$ ), 39.2 (C- $\text{CH}_3$ ), 34.2 ( $\text{CH}_3$ ), 27.8 ( $\text{C}_{\text{Arom-CH}_2}$ ), 26.1 ( $\text{C}_{\text{Arom-CH}_2\text{CH}_2}$ ). **IR** (ATR)  $\text{cm}^{-1}$ : 3022 (=C-

H), 2957 (C-H), 1744 (C=O), 1636 (C=C). **MS** (EI)  $m/z$  (%): 288.2 (44), 170.1 (44), 141.1 (100). **HRMS** (ESI<sup>+</sup>):  $m/z$  calculated for [C<sub>21</sub>H<sub>22</sub>OBr]<sup>+</sup> 369.0854; found 369.0848 [M+H]<sup>+</sup>.

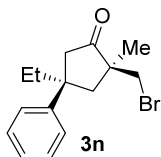

(2*S*,4*R*)-2-(bromomethyl)-4-ethyl-2-methyl-4-phenylcyclopentan-1-one **3n**

Following the general procedure F, **3n** was isolated as a yellowish oil (25.2 mg; 0.08 mmol; 85 %; dr: 1.2:1; 1<sup>st</sup> diastereomer 70 %ee and 2<sup>nd</sup> diastereomer 72 %ee) by FC (PE:EtOAc = 95:5), starting from 3-ethyl-3-phenyl-1-(prop-1-en-2-yl)cyclobutan-1-ol (21.6 mg; 0.10 mmol) **1n** and **2b** (4.3 mg; 0.0025 mmol) in toluene (0.5 mL) and NBS (19.6 mg; 0.11 mmol). The enantiomeric excess of product was determined by HPLC using Chiralpack OD3 column [Hexane: *i*PrOH 99:1; flow = 0.5 mL/min. 1<sup>st</sup> diastereomer:  $t_{r\text{major}} = 14.8$  min.;  $t_{r\text{major}} = 18.8$  min. 2<sup>nd</sup> diastereomer:  $t_{r\text{minor}} = 18.2$  min.;  $t_{r\text{major}} = 25.7$  min.].  $[\alpha]_D^{20} = -36.7$  ( $c=1$ , CHCl<sub>3</sub>). **Rf** = 0.48 (PE:EtAcO = 95:5). The spectral data is given for a mixture 1.2:1 of both diastereomers: **<sup>1</sup>H NMR** (300 MHz, CDCl<sub>3</sub>)  $\delta$  7.32—7.12 (m, 5H, C<sub>Arom</sub>-H of each diastereomers), 3.39 (d,  $J = 10.0$  Hz, 1H, CH<sub>a</sub>H<sub>b</sub>Br minor), 3.22 (d,  $J = 10.0$  Hz, 1H, CH<sub>a</sub>H<sub>b</sub>Br minor), 3.11 (d,  $J = 10.0$  Hz, 1H, CH<sub>a</sub>H<sub>b</sub>Br major), 3.05 (dd,  $J = 17.5, 1.8$  Hz, 1H, C<sup>1</sup>H<sub>a</sub>H<sub>b</sub> minor), 2.96 (d,  $J = 10.0$  Hz, 1H, CH<sub>a</sub>H<sub>b</sub>Br major), 2.89 (d,  $J = 17.4$  Hz, 1H, C<sup>1</sup>H<sub>a</sub>H<sub>b</sub> major), 2.64 (d,  $J = 13.8$  Hz, 1H, C<sup>2</sup>H<sub>a</sub>H<sub>b</sub> major), 2.59 (d,  $J = 17.4$  Hz, 1H, C<sup>1</sup>H<sub>a</sub>H<sub>b</sub> major), 2.50 (d,  $J = 13.4$  Hz, 1H, C<sup>2</sup>H<sub>a</sub>H<sub>b</sub> minor), 2.40 (d,  $J = 17.5$  Hz, 1H, C<sup>1</sup>H<sub>a</sub>H<sub>b</sub> minor), 2.22 (dd,  $J = 13.4, 1.8$  Hz, 1H, C<sup>2</sup>H<sub>a</sub>H<sub>b</sub> minor), 2.11 (d,  $J = 13.8$  Hz, 1H, C<sup>2</sup>H<sub>a</sub>H<sub>b</sub> major), 1.89 (dq,  $J = 13.8, 7.4$  Hz, 1H, CH<sub>a</sub>H<sub>b</sub>CH<sub>3</sub> minor), 1.81—1.53 (m, 3H, CH<sub>a</sub>H<sub>b</sub>CH<sub>3</sub> minor, CH<sub>a</sub>H<sub>b</sub>CH<sub>3</sub> major, CH<sub>a</sub>H<sub>b</sub>CH<sub>3</sub> major), 1.24 (s, 3H, CH<sub>3</sub> major), 0.72 (s, 3H, CH<sub>3</sub> minor), 0.58 (t,  $J = 7.4$  Hz, 3H, CH<sub>2</sub>CH<sub>3</sub> minor), 0.57 (t,  $J = 7.4$  Hz, 3H, CH<sub>2</sub>CH<sub>3</sub> major). **<sup>13</sup>C{<sup>1</sup>H} NMR** (75.5 MHz, CDCl<sub>3</sub>)  $\delta$  218.3 (C=O, minor), 218.2 (C=O, major), 145.8 (C<sub>Arom</sub>-C, major), 145.6 (C<sub>Arom</sub>-C, minor), 128.5 (2x C<sub>Arom</sub>-H of each diastereomer), 126.5 (C<sub>Arom</sub>-H major), 126.5 (C<sub>Arom</sub>-H minor), 126.4 (2x C<sub>Arom</sub>-H of each diastereomer), 50.0 (CH<sub>2</sub>Br, major), 49.6 (C-CH<sub>2</sub>Br, major), 49.5 (C-CH<sub>2</sub>Br, minor), 49.4 (CH<sub>2</sub>Br, minor), 47.8 (C<sup>1</sup>H<sub>2</sub> minor), 46.1 (C<sup>1</sup>H<sub>2</sub> major), 45.0 (C-CH<sub>2</sub> minor), 44.9 (C-CH<sub>2</sub> major), 41.4 (C<sup>2</sup>H<sub>2</sub> major), 40.9 (C<sup>2</sup>H<sub>2</sub> minor), 37.5 (CH<sub>2</sub>CH<sub>3</sub> minor), 36.5 (CH<sub>2</sub>CH<sub>3</sub> major), 24.6 (CH<sub>3</sub> major), 24.2 (CH<sub>3</sub> minor), 9.5

(CH<sub>2</sub>CH<sub>3</sub>, minor), 9.1 (CH<sub>2</sub>CH<sub>3</sub>, major). **IR** (ATR) cm<sup>-1</sup>: 1738 (C=O). **MS** (EI) e/z (%): 296.9 (M+H, 2), 264.9 (20), 157 (95), 55 (100). **HRMS** (ESI<sup>+</sup>): decomposition.

## Synthesis and characterization of products **4a** and **3a**

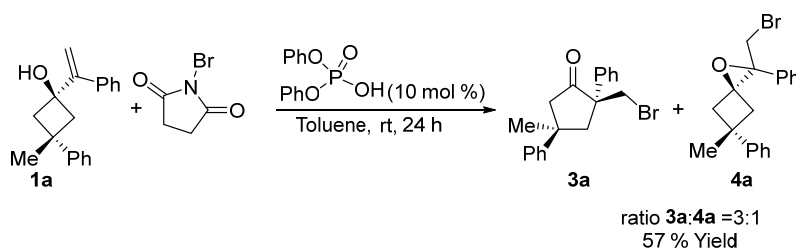

**Scheme S 9.** Synthesis of epoxide **4a**.

Compound **4a** was prepared by treating 3-methyl-3-phenyl-1-(1-phenylvinyl)cyclobutan-1-ol **1a** (79.2 mg; 0.3 mmol) and diphenylphosphoric acid (7.5 mg; 0.01 mmol) in toluene (1.5 mL) with NBS (64.2 mg; 0.36 mmol) at room temperature. The reaction was let stirring for 24 hours, then it was concentrated under vacuum and directly purified by column chromatography (PE:EtOAc = 95:5) to obtain 58.8 mg as a mixture of 2-(bromomethyl)-4-methyl-2,4-diphenylcyclopentan-1-one **3a** and 2-(bromomethyl)-5-methyl-2,5-diphenyl-1-oxaspiro[2.3]hexane **4a** in a 3:1 ratio. The epoxide **4a** was separated by preparative TLC employing PE:EtOAc 95:1.  $R_f = 0.36$  (PE:EtOAc = 95:5).  $^1\text{H NMR}$  (300 MHz,  $\text{CDCl}_3$ )  $\delta$  7.41 – 7.30 (m, 5H,  $\text{C}_{\text{Arom-H}}$ ), 7.29 – 7.17 (m, 5H,  $\text{C}_{\text{Arom-H}}$ ), 3.88 (d,  $J = 10.9$  Hz, 1H,  $\text{CH}_a\text{H}_b\text{Br}$ ), 3.44 (d,  $J = 10.9$  Hz, 1H,  $\text{CH}_a\text{H}_b\text{Br}$ ), 3.13 – 2.94 (dt,  $J = 13.1, 1.6$  Hz, 1H,  $\text{C}^1\text{H}_a\text{H}_b$ ), 2.62 (ddd,  $J = 13.1, 2.5, 1.3$  Hz, 1H,  $\text{C}^1\text{H}_a\text{H}_b$ ), 2.49 (app dt,  $J = 13.4, 1.6$  Hz, 1H,  $\text{C}^2\text{H}_a\text{H}_b$ ), 2.31 (ddd,  $J = 13.4, 2.5, 1.3$  Hz, 1H,  $\text{C}^2\text{H}_a\text{H}_b$ ), 1.63 (s, 1H,  $\text{CH}_3$ ).  $^{13}\text{C}\{^1\text{H}\}$  NMR (75.5 MHz,  $\text{CDCl}_3$ )  $\delta$  148.98 ( $\text{C}_{\text{Arom-C}}$ ), 135.80 ( $\text{C}_{\text{Arom-C}}$ ), 128.36 (2x $\text{C}_{\text{Arom-H}}$ ), 128.18 (2x $\text{C}_{\text{Arom-H}}$ ), 127.89 ( $\text{C}_{\text{Arom-H}}$ ), 126.57 (2x $\text{C}_{\text{Arom-H}}$ ), 125.92 ( $\text{C}_{\text{Arom-H}}$ ), 125.39 (2x $\text{C}_{\text{Arom-H}}$ ), 69.88 ( $\text{C-CH}_2\text{Br}$ ), 64.20 ( $\text{C-O}$ ), 42.67 ( $\text{C}^1\text{H}_2$ ), 42.44 ( $\text{C}^2\text{H}_2$ ), 36.90 ( $\text{C-CH}_3$ ), 35.77 ( $\text{CH}_2\text{Br}$ ), 32.13 ( $\text{CH}_3$ ). IR (ATR)  $\text{cm}^{-1}$ : 3020 (=C-H), 2958 (C-H). HRMS (ESI<sup>+</sup>):  $m/z$  calculated for  $[\text{C}_{19}\text{H}_{19}\text{OBr}+\text{Na}]^+$  365.0517; found 365.0507  $[\text{M}+\text{Na}]^+$ .

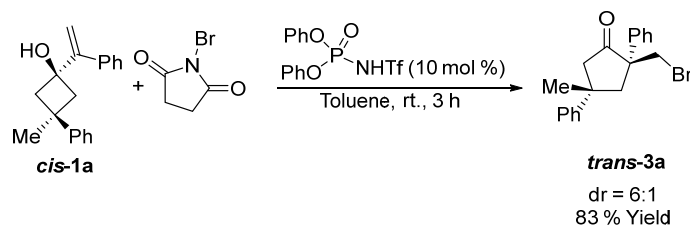

**Scheme S 10.** Synthesis of ketone **3a<sub>trans</sub>**.

Compound **trans-3a** was prepared by treating 3-methyl-3-phenyl-1-(1-phenylvinyl)cyclobutan-1-ol **cis-1a** (26.4 mg; 0.1 mmol) and diphenyl

((trifluoromethyl)sulfonyl)phosphoramidate (3.8 mg; 0.01 mmol) in toluene (0.5 mL) with NBS (21.4 mg; 0.12 mmol) at room temperature. The reaction was let stirring for 3 h and then it was concentrated under vacuum and directly purified by column chromatography (PE:EtOAc = 95:5) to obtain 2-(bromomethyl)-4-methyl-2,4-diphenylcyclopentan-1-one **trans-3a** (28.5 mg; 0.083 mmol; 83 % yield). **Rf** = 0.36 (PE:EtOAc = 95:5). **IR** (ATR)  $\text{cm}^{-1}$ : 3020 (=C-H), 2958 (C-H), 1739 (C=O), 1643 (C=C), 1465 ( $\text{CH}_2$ ), 1439 ( $\text{CH}_3$ ). **MS** (EI)  $e/z$  (%): 263.2 (34), 205.1 (25), 145.1 (39), 117.1 (100). **HRMS** (ESI<sup>+</sup>):  $m/z$  calculated for  $[\text{C}_{19}\text{H}_{19}\text{OBr}+\text{Na}]^+$  365.0517; found 365.0507  $[\text{M}+\text{Na}]^+$ . **<sup>1</sup>H NMR** (300 MHz,  $\text{CDCl}_3$ )  $\delta$  7.35 – 7.27 (m, 1H,  $\text{C}_{\text{Arom-H}}$ ), 7.15 – 6.95 (m, 9H,  $\text{C}_{\text{Arom-H}}$ ), 3.68 (d,  $J = 10.3$  Hz, 1H,  $\text{CH}_a\text{H}_b\text{Br}$ ), 3.53 (d,  $J = 10.3$  Hz, 1H,  $\text{CH}_a\text{H}_b\text{Br}$ ), 3.02 (dd,  $J = 13.9, 12.1$  Hz, 2H,  $\text{C}^1\text{H}_a\text{H}_b + \text{C}^2\text{H}_a\text{H}_b$ ), 2.81 (d,  $J = 13.8$  Hz, 1H,  $\text{C}^1\text{H}_a\text{H}_b$ ), 2.47 (d,  $J = 17.3$  Hz, 1H,  $\text{C}^2\text{H}_a\text{H}_b$ ), 1.47 (s, 3H,  $\text{CH}_3$ ). **<sup>13</sup>C{<sup>1</sup>H} NMR** (75.5 MHz,  $\text{CDCl}_3$ )  $\delta$  215.01 (C=O), 147.73 ( $\text{C}_{\text{Arom-C}}$ ), 139.13 ( $\text{C}_{\text{Arom-C}}$ ), 128.38 ( $2\times\text{C}_{\text{Arom-H}}$ ), 128.27 ( $2\times\text{C}_{\text{Arom-H}}$ ), 127.28 ( $\text{C}_{\text{Arom-H}}$ ), 126.53 ( $2\times\text{C}_{\text{Arom-H}}$ ), 126.15 ( $\text{C}_{\text{Arom-H}}$ ), 125.53 ( $2\times\text{C}_{\text{Arom-H}}$ ), 57.87 (C- $\text{CH}_2\text{Br}$ ), 51.74 ( $\text{C}^1\text{H}_2$ ), 46.79 ( $\text{CH}_2\text{Br}$ ), 40.99 ( $\text{C}^2\text{H}_2$ ), 40.32 (C- $\text{CH}_3$ ), 31.74 ( $\text{CH}_3$ ).

## Synthesis and characterization of catalysts **2b** and **2k-2m**.

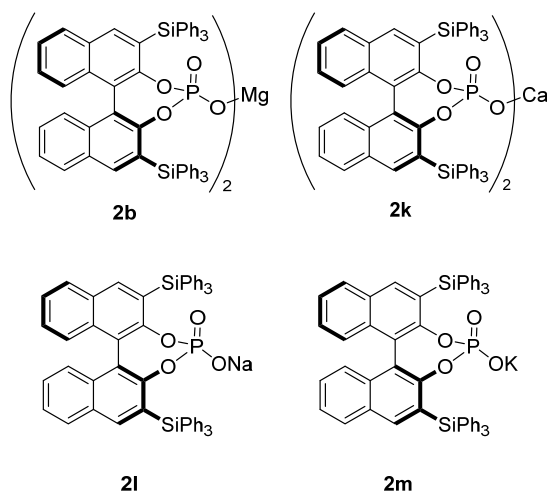

Figure S 6. Chiral phosphates salts **2b**, **2k-2m**.

All compounds were prepared according to the reported general procedure G<sup>13</sup>

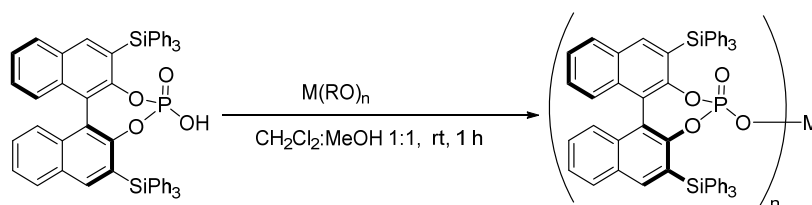

Scheme S 11. Synthesis of catalyst **2d**.

### General procedure G for the synthesis of catalysts **2b**, **2k-2m**.

To a flame dry test tube **2a** and  $Mg(OtBu)_2$ ,  $Ca(OMe)_2$ ,  $NaOMe$  or  $KOtBu$  were added followed by the addition of 0.3 mL each of dry  $CH_2Cl_2$  and dry  $MeOH$  and reaction mixture was stirred for 1 h. Solvents were removed under reduced pressure to obtain catalysts **2b**, **2k-2m** quantitatively as a white solid.

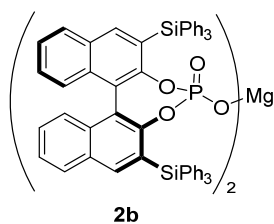

Catalyst **2a** (500 mg; 0.579 mmol) was dissolved in dry mixture of  $CH_2Cl_2:MeOH$  1:1 (11.6 mL) in a dry reaction tube and  $Mg(OtBu)_2$  (53 mg, 0.289 mmol) was added. The reaction mixture was let stir at room temperature for 1h, then solvents were evaporated in

<sup>13</sup> G K. Ingle, Y. Liang, M. G. Mormino, G. Li, F. R. Fronczek, J. C. Antilla, *Org. Lett.* **2011**, *13*, 2054–2057. M. Klussmann, L. Ratjen, S. Hoffmann, V. Wakchaure, R. Goddard, B. List, *Synlett*, **2010**, *14*, 2189–2192.



vacuum to obtain the catalyst **2b** (507 mg, 0.289 mmol; quant.) without purification.  $[\alpha]_D^{20} = -167$  ( $c=0.31$ ,  $\text{CHCl}_3$ ).  $^1\text{H NMR}$  (300 MHz,  $\text{CDCl}_3$ )  $\delta$  7.84 (s, 4H), 7.62 (d,  $J = 8.0$  Hz, 4H), 7.58 – 7.48 (m, 24H), 7.31 – 7.10 (m, 44H), 7.03 (d,  $J = 8.4$  Hz, 4H).  $^{13}\text{C}\{^1\text{H}\}$  NMR (75.5 MHz,  $\text{CDCl}_3$ )  $\delta$  152.85 ( $2\times\text{C}_{\text{Arom-C}}$ ), 152.73 ( $2\times\text{C}_{\text{Arom-C}}$ ), 141.99 ( $4\times\text{C}_{\text{Arom-H}}$ ), 136.75 ( $24\times\text{C}_{\text{Arom-H}}$ ), 134.77 ( $2\times\text{C}_{\text{Arom-C}}$ ), 134.76 ( $2\times\text{C}_{\text{Arom-C}}$ ), 134.56 ( $12\times\text{C}_{\text{Arom-C}}$ ), 130.35 ( $2\times\text{C}_{\text{Arom-C}}$ ), 130.34 ( $2\times\text{C}_{\text{Arom-C}}$ ), 129.60 ( $12\times\text{C}_{\text{Arom-H}}$ ), 128.54 ( $4\times\text{C}_{\text{Arom-H}}$ ), 127.85 ( $24\times\text{C}_{\text{Arom-H}}$ ), 127.23 ( $4\times\text{C}_{\text{Arom-H}}$ ), 126.76 ( $4\times\text{C}_{\text{Arom-H}}$ ), 125.71 ( $2\times\text{C}_{\text{Arom-C}}$ ), 125.66 ( $2\times\text{C}_{\text{Arom-C}}$ ), 124.86 ( $4\times\text{C}_{\text{Arom-H}}$ ), 121.75 ( $2\times\text{C}_{\text{Arom-C}}$ ), 121.72 ( $2\times\text{C}_{\text{Arom-C}}$ ).  $^{31}\text{P NMR}$  (122 MHz,  $\text{CDCl}_3$ )  $\delta$  1.27 ppm. **MALDI-LTQ-ORBITRAP**:  $m/z$  calculated for  $\text{C}_{112}\text{H}_{80}\text{O}_8\text{P}_2\text{Si}_4\text{MgNa}$ : 1774.4182;  $m/z$  found for  $\text{C}_{112}\text{H}_{80}\text{O}_8\text{P}_2\text{Si}_4\text{MgNa}$ : 1774.4166.

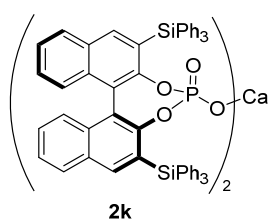

Catalyst **2a** (30 mg; 0.0347 mmol) was dissolved in dry mixture of  $\text{CH}_2\text{Cl}_2$ :MeOH 1:1 (0.6 mL) in a dry reaction tube and  $\text{Ca}(\text{OMe})_2$  (1.8 mg; 0.0174 mmol) was added. The reaction mixture was let stir at room temperature for 1h, then solvents were evaporated in vacuum to obtain catalyst **2k** (30.8 mg, 0.0174 mmol; quant.) without purification.  $[\alpha]_D^{20} = -105.15$  ( $c = 0.96$ ,  $\text{CHCl}_3$ ).  $^1\text{H NMR}$  (300 MHz,  $\text{CDCl}_3$ )  $\delta$  7.84 (s, 4H), 7.62 (d,  $J = 8.0$  Hz, 4H), 7.58 – 7.48 (m, 24H), 7.31 – 7.10 (m, 44H), 7.03 (d,  $J = 8.4$  Hz, 4H).  $^{13}\text{C}\{^1\text{H}\}$  NMR (75.5 MHz,  $\text{CDCl}_3$ )  $\delta$  152.85 ( $2\times\text{C}_{\text{Arom-C}}$ ), 152.73 ( $2\times\text{C}_{\text{Arom-C}}$ ), 142.13 ( $4\times\text{C}_{\text{Arom-H}}$ ), 136.84 ( $24\times\text{C}_{\text{Arom-H}}$ ), 134.93 ( $12\times\text{C}_{\text{Arom-C}}$ ), 134.67 ( $4\times\text{C}_{\text{Arom-C}}$ ), 130.35 ( $4\times\text{C}_{\text{Arom-C}}$ ), 129.42 ( $12\times\text{C}_{\text{Arom-H}}$ ), 128.60 ( $4\times\text{C}_{\text{Arom-H}}$ ), 127.73 ( $24\times\text{C}_{\text{Arom-H}}$ ), 127.22 ( $4\times\text{C}_{\text{Arom-H}}$ ), 126.80 ( $4\times\text{C}_{\text{Arom-H}}$ ), 125.74 ( $2\times\text{C}_{\text{Arom-C}}$ ), 125.70 ( $2\times\text{C}_{\text{Arom-C}}$ ), 124.81 ( $4\times\text{C}_{\text{Arom-H}}$ ), 121.93 ( $2\times\text{C}_{\text{Arom-C}}$ ), 121.91 ( $2\times\text{C}_{\text{Arom-C}}$ ).  $^{31}\text{P NMR}$  (122 MHz,  $\text{CDCl}_3$ )  $\delta$  1.83 ppm.

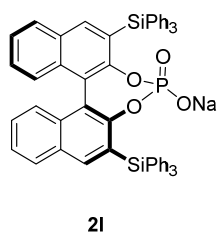

Catalyst **2a** (30 mg; 0.0347 mmol) was dissolved in dry mixture of  $\text{CH}_2\text{Cl}_2$ :MeOH 1:1 (0.6 mL) in a dry reaction tube and NaOMe (1.9 mg, 0.0347mmol) was added. The

reaction mixture was let stir at room temperature for 1h, then solvents were evaporated in vacuum to obtain catalyst **2l** (30.8 mg, 0.0347 mmol; quant.) without purification.  $[\alpha]_{\text{D}}^{20} = -159.23$  ( $c=0.07$ ,  $\text{CHCl}_3$ ).  $^1\text{H NMR}$  (300 MHz,  $\text{CDCl}_3$ )  $\delta$  7.84 (s, 4H), 7.62 (d,  $J = 8.0$  Hz, 4H), 7.58 – 7.48 (m, 24H), 7.31 – 7.10 (m, 44H), 7.03 (d,  $J = 8.4$  Hz, 4H).  $^{13}\text{C}\{^1\text{H}\}$  NMR (75.5 MHz,  $\text{CDCl}_3$ )  $\delta$  153.20 ( $1\times\text{C}_{\text{Arom-C}}$ ), 153.08 ( $1\times\text{C}_{\text{Arom-C}}$ ), 141.83 ( $2\times\text{C}_{\text{Arom-H}}$ ), 136.75 ( $12\times\text{C}_{\text{Arom-H}}$ ), 135.00 ( $2\times\text{C}_{\text{Arom-C}}$ ), 134.88 ( $6\times\text{C}_{\text{Arom-C}}$ ), 130.37 ( $\text{C}_{\text{Arom-C}}$ ), 129.14 ( $6\times\text{C}_{\text{Arom-H}}$ ), 128.59 ( $2\times\text{C}_{\text{Arom-H}}$ ), 127.58 ( $12\times\text{C}_{\text{Arom-H}}$ ), 127.13 ( $2\times\text{C}_{\text{Arom-H}}$ ), 127.03 ( $2\times\text{C}_{\text{Arom-H}}$ ), 126.17 ( $2\times\text{C}_{\text{Arom-C}}$ ), 126.13 ( $\text{C}_{\text{Arom-C}}$ ), 124.66 ( $2\times\text{C}_{\text{Arom-H}}$ ), 121.78 ( $\text{C}_{\text{Arom-C}}$ ), 121.76 ( $\text{C}_{\text{Arom-C}}$ ).  $^{31}\text{P NMR}$  (122 MHz,  $\text{CDCl}_3$ )  $\delta$  1.49 ppm.

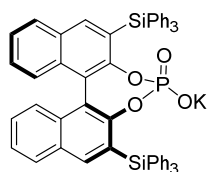

**2m**

Catalyst **2a** (30 mg; 0.0347 mmol) was dissolved in dry mixture of  $\text{CH}_2\text{Cl}_2:\text{MeOH}$  1:1 (0.6 mL) in a dry reaction tube and  $\text{KO}t\text{Bu}$  (3.9 mg, 0.0347 mmol) was added. The reaction mixture was let stir at room temperature for 1h, then solvents were evaporated in vacuum to obtain catalyst **2m** (31 mg, 0.035 mmol; quant.) without purification.  $[\alpha]_{\text{D}}^{20} = -146.86$  ( $c=0.17$ ,  $\text{CHCl}_3$ ).  $^1\text{H NMR}$  (300 MHz,  $\text{CDCl}_3$ )  $\delta$  7.84 (s, 4H), 7.62 (d,  $J = 8.0$  Hz, 4H), 7.58 – 7.48 (m, 24H), 7.31 – 7.10 (m, 44H), 7.03 (d,  $J = 8.4$  Hz, 4H).  $^{13}\text{C}\{^1\text{H}\}$  NMR (75.5 MHz,  $\text{CDCl}_3$ )  $\delta$  152.28 ( $\text{C}_{\text{Arom-C}}$ ), 152.16 ( $\text{C}_{\text{Arom-C}}$ ), 140.78 ( $2\times\text{C}_{\text{Arom-H}}$ ), 135.76 ( $12\times\text{C}_{\text{Arom-H}}$ ), 133.79 ( $2\times\text{C}_{\text{Arom-C}}$ ), 133.57 ( $6\times\text{C}_{\text{Arom-C}}$ ), 129.20 ( $2\times\text{C}_{\text{Arom-C}}$ ), 128.27 ( $6\times\text{C}_{\text{Arom-H}}$ ), 127.61 ( $2\times\text{C}_{\text{Arom-H}}$ ), 126.61 ( $12\times\text{C}_{\text{Arom-H}}$ ), 126.23 ( $2\times\text{C}_{\text{Arom-H}}$ ), 125.53 ( $2\times\text{C}_{\text{Arom-H}}$ ), 125.12 ( $\text{C}_{\text{Arom-C}}$ ), 125.08 ( $\text{C}_{\text{Arom-C}}$ ), 123.75 ( $2\times\text{C}_{\text{Arom-H}}$ ), 120.99 ( $\text{C}_{\text{Arom-C}}$ ), 120.96. ( $\text{C}_{\text{Arom-C}}$ ).  $^{31}\text{P NMR}$  (122 MHz,  $\text{CDCl}_3$ )  $\delta$  1.81 ppm.

## Non linear effect study.

Following the general procedure G, catalysts with different enantiomeric ratios were prepared using different ratios of *R* and *S* enantiomers of the corresponding chiral phosphoric acids (Scheme S 12).

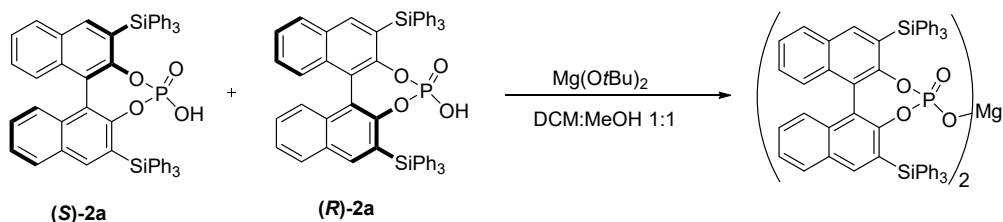

**Scheme S 12.** Synthesis of catalyst using different ratios of chiral phosphoric acid enantiomers.

In order to verify the formation of catalysts,  $^{31}\text{P}$ -NMR spectra in  $\text{CDCl}_3$  were recorded, observing two signals that have a similar proportion to the ratio of phosphoric acid enantiomers used in each case.

With these catalysts in hand, the model reaction was carried out under the conditions established in general procedure F, the final product was purified, and the enantiomeric excess was measured by HPLC (Table S 6).

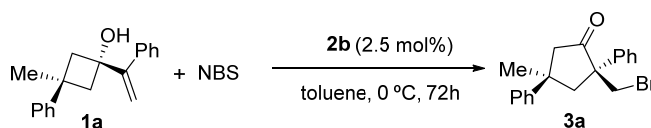

**Table S 5.** Non linear effect results.<sup>a</sup>

| Entry | er catalyst<br>( <i>R</i> ):( <i>S</i> ) | $^{31}\text{P}$ -NMR signals (ppm) | ee product % <sup>b</sup> |
|-------|------------------------------------------|------------------------------------|---------------------------|
| 1     | 50:50 (0)                                | 1.84, 1.28                         | 6                         |
| 2     | 60:40 (20)                               | 1.76, 1.26                         | 30                        |
| 3     | 70:30 (40)                               | 1.94, 1.46                         | 46                        |
| 4     | 80:20 (60)                               | 1.66, 1.09                         | 56                        |
| 5     | 90:10 (80)                               | 1.65, 1.21                         | 72                        |
| 6     | 100:0 (100)                              | 1.27                               | 92                        |

<sup>a</sup> Reactions carried out with 0.10 mmol of **1a**, 0.11 mmol of NBS and 2.5 mol% of **2b** with different ee ratios in toluene (0.2 M) at 0 °C for 72h. The numbers between parenthesis indicate the enantiomeric excess of catalyst **2b**.<sup>b</sup> Product **3a** was isolated and ee was determined by HPLC on a chiral stationary phase.

## Hammett study

Hammett study was carried out to analyze the effect of the substitution in *para*-position of the aromatic ring. The analysis was performed based on competition experiments between the unsubstituted cyclobutanol **1a** and its *para*-substituted equivalent **1h-k**. These competition experiments were carried out with 0.05 mmol of **1a**, 0.05 mmol of **1h-k**, 0.055 mmol of NBS and 2.5 mol% (0.00125 mmol) of catalyst **2b** in toluene (0.25 mL) at 0 °C for 45 h. The experiments were quenched with aq. std. Na<sub>2</sub>S<sub>2</sub>O<sub>3</sub> (1 mL) and the products were extracted with Et<sub>2</sub>O (3 x 2 mL). At this point, 0.05 mmol of 1,3,5-trimethoxybenzene was added as standard for subsequent NMR analysis. The mixture was dried with Na<sub>2</sub>SO<sub>4</sub>, filtered, and concentrated under vacuum.

These experiments were stopped at 45 h and the product ratio [p<sub>X</sub>]/[p<sub>H</sub>] was calculated by <sup>1</sup>H-NMR using 1,3,5-trimethoxybenzene as standard. This experimental ratio was approximated to rate constants ratio k<sub>X</sub>/k<sub>H</sub>.<sup>14</sup>

**Table S 6.** Data obtained from competition experiments in Hammett study.

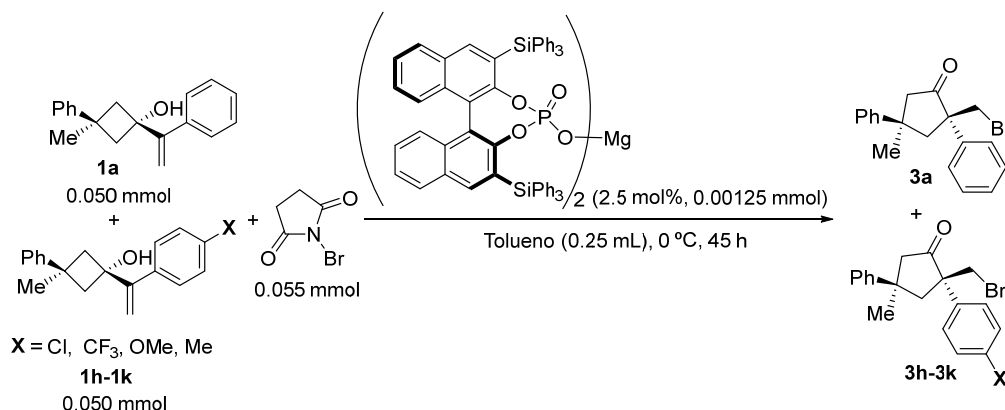

| Entry            | 1  | Substituent (X) | $\sigma_p^{[a]}$ | $\sigma_p^{+[b]}$ | $k_{[X]}/k_{[H]}$ | $\log [k_X]/[k_H]$ |
|------------------|----|-----------------|------------------|-------------------|-------------------|--------------------|
| 1                | 1h | Me              | -0,17            | -0,31             | 5,25              | 0,72               |
| 2 <sup>[c]</sup> | 1i | OMe             | -0,27            | -0,78             | 9,71              | 0,99               |
| 3                | 1j | Cl              | 0,23             | 0,11              | 0,6               | -0,22              |
| 4                | 1k | CF <sub>3</sub> | 0,54             | 0,61              | 0,08              | -1,08              |

<sup>a</sup> Hammett constants for *para* substituents with inductive effect.<sup>15</sup> <sup>b</sup> Hammett constants for *para* substituents with resonance effect.<sup>15</sup> <sup>c</sup> Epoxide **4i** was also considered in [p<sub>X</sub>] in this case.

<sup>14</sup> F. Romanov-Michailidis, M. Romanova-Michaelides, M. Pupier and A. Alexakis, *Chem. Eur. J.* **2015**, *21*, 5561-5583.

<sup>15</sup> Hammett, L. P. *J. Am. Chem. Soc.* **1937**, *59*, 96-103.

The logarithms of the rate constants ratios were plotted out with the Hammett substituent constants ( $\sigma$  and  $\sigma^+$ ) for each substituent,<sup>16</sup> according to the known Hammett relationship [Eq. (1)].

$$\log \left( \frac{k_X}{k_H} \right) = \rho \sigma \quad (1)$$

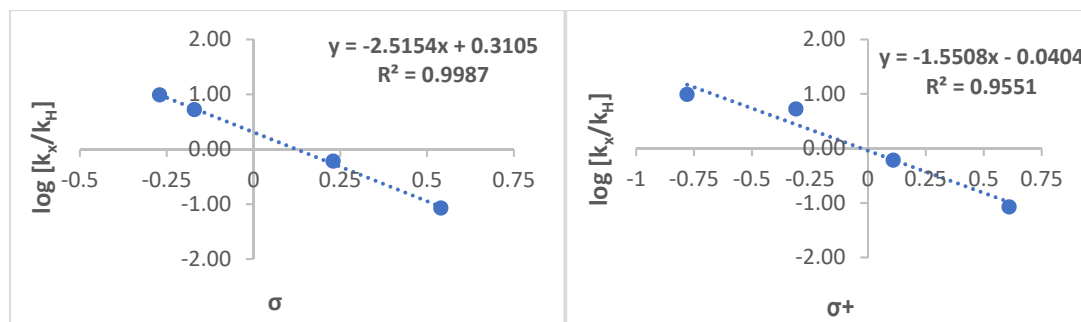

**Figure S 7.** Hammett plots for  $\sigma$  and  $\sigma^+$ .

<sup>16</sup> C. Hansch, A. Leo, R. W. Taft, *Chem. Rev.* **1991**, *91*, 165-195.

## X-Ray analysis of product **3j**.

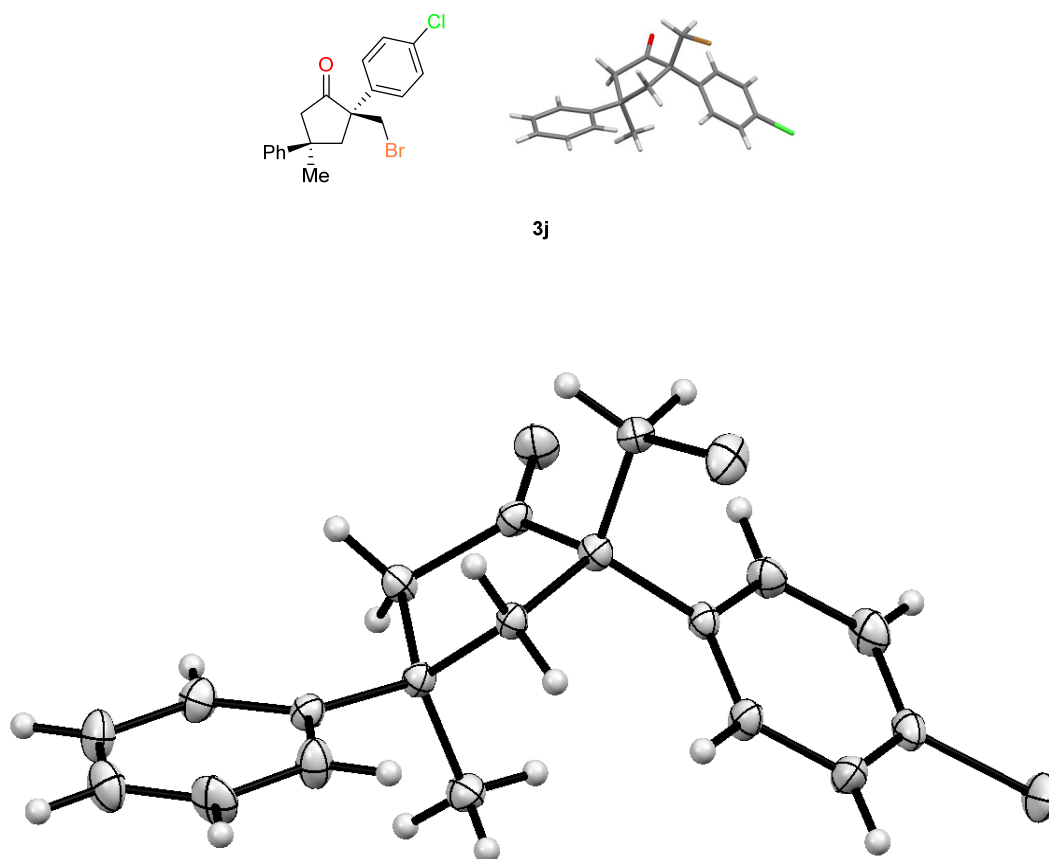

**Figure S 8.** X-Ray structure and ORTEP diagram (50% probability) for **3j**.

The enantiopure sample of compound **3j** was obtained following General Procedure F. Crystals of the sample were obtained after slow evaporation of a mixture of Hexane/Ethyl acetate 1:1 in a screw-top vial.

**Crystal Data** for  $C_{19}H_{18}BrClO$  ( $M = 377.69$  g/mol) (**3j**, CCDC number 2091677): orthorhombic, space group  $P2_12_12_1$  (no. 19),  $a = 6.83880(10)$  Å,  $b = 13.6467(2)$  Å,  $c = 17.6849(2)$  Å,  $V = 1650.48(4)$  Å<sup>3</sup>,  $Z = 4$ ,  $T = 150.01(10)$  K,  $\mu(\text{CuK}\alpha) = 4.863$  mm<sup>-1</sup>,  $D_{\text{calc}} = 1.520$  g/cm<sup>3</sup>, 15576 reflections measured ( $8.18^\circ \leq 2\theta \leq 137.86^\circ$ ), 3075 unique ( $R_{\text{int}} = 0.0537$ ,  $R_{\text{sigma}} = 0.0373$ ) which were used in all calculations. The final  $R_1$  was 0.0294 ( $>2\sigma(I)$ ) and  $wR_2$  was 0.0713 (all data).

**Table S 7.** Crystal data and structure refinement for **3j**.

|                                             |                                                               |
|---------------------------------------------|---------------------------------------------------------------|
| Identification code                         | <b>3j</b>                                                     |
| Empirical formula                           | C <sub>19</sub> H <sub>18</sub> BrClO                         |
| Formula weight                              | 377.69                                                        |
| Temperature/K                               | 150.01(10)                                                    |
| Crystal system                              | orthorhombic                                                  |
| Space group                                 | P2 <sub>1</sub> 2 <sub>1</sub> 2 <sub>1</sub>                 |
| a/Å                                         | 6.83880(10)                                                   |
| b/Å                                         | 13.6467(2)                                                    |
| c/Å                                         | 17.6849(2)                                                    |
| α/°                                         | 90.00                                                         |
| β/°                                         | 90.00                                                         |
| γ/°                                         | 90.00                                                         |
| Volume/Å <sup>3</sup>                       | 1650.48(4)                                                    |
| Z                                           | 4                                                             |
| ρ <sub>calc</sub> /cm <sup>3</sup>          | 1.520                                                         |
| μ/mm <sup>-1</sup>                          | 4.863                                                         |
| F(000)                                      | 768.0                                                         |
| Crystal size/mm <sup>3</sup>                | 0.223 × 0.051 × 0.043                                         |
| Radiation                                   | CuKα (λ = 1.54184)                                            |
| 2θ range for data collection/°              | 8.18 to 137.86                                                |
| Index ranges                                | -8 ≤ h ≤ 8, -16 ≤ k ≤ 16, -21 ≤ l ≤ 18                        |
| Reflections collected                       | 15576                                                         |
| Independent reflections                     | 3075 [R <sub>int</sub> = 0.0537, R <sub>sigma</sub> = 0.0373] |
| Data/restraints/parameters                  | 3075/0/200                                                    |
| Goodness-of-fit on F <sup>2</sup>           | 1.058                                                         |
| Final R indexes [I ≥ 2σ (I)]                | R <sub>1</sub> = 0.0294, wR <sub>2</sub> = 0.0691             |
| Final R indexes [all data]                  | R <sub>1</sub> = 0.0323, wR <sub>2</sub> = 0.0713             |
| Largest diff. peak/hole / e Å <sup>-3</sup> | 0.33/-0.36                                                    |
| Flack parameter                             | -0.031(19)                                                    |

**Table S 8.** Fractional Atomic Coordinates ( $\times 10^4$ ) and Equivalent Isotropic Displacement Parameters ( $\text{\AA}^2 \times 10^3$ ) for **3j**.  $U_{\text{eq}}$  is defined as 1/3 of the trace of the orthogonalised  $U_{ij}$  tensor.

| Atom | $x$        | $y$        | $z$         | $U(\text{eq})$ |
|------|------------|------------|-------------|----------------|
| Br01 | 4630.2(5)  | 3194.5(2)  | 5220.14(18) | 28.87(10)      |
| C100 | 5089.4(13) | 6229.1(6)  | 8115.2(3)   | 31.33(19)      |
| O003 | -562(3)    | 5503.4(16) | 4859.1(12)  | 25.9(5)        |
| C004 | 4661(5)    | 6448.8(19) | 3131.4(14)  | 16.6(5)        |
| C005 | 1071(4)    | 5617(2)    | 4613.1(15)  | 17.4(6)        |
| C006 | 4411(4)    | 5305.4(19) | 4276.7(13)  | 15.4(5)        |
| C007 | 5389(5)    | 5650(2)    | 5907.8(15)  | 20.2(6)        |
| C008 | 3829(4)    | 6307(2)    | 3926.8(15)  | 15.9(5)        |
| C009 | 3476(4)    | 5447(2)    | 5708.3(15)  | 16.0(6)        |
| C00A | 3591(5)    | 6916(2)    | 2569.6(16)  | 22.4(6)        |
| C00B | 2930(4)    | 5087(2)    | 4908.3(15)  | 16.2(6)        |
| C00C | 4514(5)    | 7168(2)    | 4418.2(15)  | 22.1(6)        |
| C00D | 4397(5)    | 7090(2)    | 1860.9(17)  | 27.5(7)        |
| C00E | 2504(5)    | 5769(2)    | 7005.0(17)  | 25.9(7)        |
| C00F | 4431(5)    | 5953(2)    | 7184.1(15)  | 22.1(6)        |
| C00G | 5893(5)    | 5895(2)    | 6649.2(16)  | 23.5(7)        |
| C00H | 2379(5)    | 4004(2)    | 4955.3(15)  | 20.6(6)        |
| C00I | 2040(5)    | 5511(2)    | 6264.3(17)  | 21.9(6)        |
| C00J | 1590(4)    | 6248(2)    | 3939.9(15)  | 17.5(6)        |
| C00K | 6581(5)    | 6176(3)    | 2974.3(17)  | 25.3(7)        |
| C00L | 7400(5)    | 6357(3)    | 2267.1(18)  | 29.9(7)        |
| C00M | 6308(5)    | 6812(3)    | 1712.9(16)  | 28.1(7)        |



**Table S 9.** Anisotropic Displacement Parameters ( $\text{\AA}^2 \times 10^3$ ) for **3j**. The Anisotropic displacement factor exponent takes the form:  $-2\pi^2[h^2a^2U_{11}+2hka*b*U_{12}+\dots]$ .

| Atom | U <sub>11</sub> | U <sub>22</sub> | U <sub>33</sub> | U <sub>23</sub> | U <sub>13</sub> | U <sub>12</sub> |
|------|-----------------|-----------------|-----------------|-----------------|-----------------|-----------------|
| Br01 | 34.31(17)       | 21.47(15)       | 30.83(15)       | -1.30(13)       | -7.76(14)       | 9.04(14)        |
| C100 | 43.7(5)         | 37.5(4)         | 12.8(3)         | -3.2(3)         | 2.7(3)          | -7.9(4)         |
| O003 | 16.2(11)        | 33.3(11)        | 28.0(10)        | 3.8(9)          | 2.8(9)          | 1.2(9)          |
| C004 | 16.2(12)        | 18.3(12)        | 15.4(11)        | -2.1(9)         | 0.6(12)         | 0.5(12)         |
| C005 | 14.0(13)        | 20.8(14)        | 17.3(13)        | -1.4(10)        | -0.4(10)        | 0.1(11)         |
| C006 | 14.2(14)        | 18.6(13)        | 13.3(11)        | -0.8(10)        | 1.2(10)         | 1.0(12)         |
| C007 | 17.7(13)        | 28.8(14)        | 14.2(11)        | -2.3(10)        | 2.9(11)         | -1.1(13)        |
| C008 | 14.0(13)        | 19.1(14)        | 14.8(12)        | -0.6(10)        | 0.1(10)         | 0.1(12)         |
| C009 | 18.2(15)        | 16.6(13)        | 13.2(12)        | -0.1(10)        | 1.8(11)         | 0.6(11)         |
| C00A | 22.6(15)        | 25.3(16)        | 19.3(13)        | -1.8(12)        | 0.5(11)         | 3.0(14)         |
| C00B | 14.7(14)        | 18.3(14)        | 15.5(13)        | -1.6(10)        | 2.5(11)         | 1.1(10)         |
| C00C | 25.4(15)        | 21.7(14)        | 19.2(12)        | -2.7(10)        | 1.4(12)         | -3.4(13)        |
| C00D | 32.4(18)        | 34.5(17)        | 15.4(12)        | 2.3(11)         | 0.3(13)         | 2.8(14)         |
| C00E | 27.6(17)        | 30.7(17)        | 19.4(14)        | -1.6(12)        | 10.0(13)        | 0.3(14)         |
| C00F | 32.6(18)        | 19.4(13)        | 14.1(12)        | -0.6(10)        | 2.8(12)         | -2.6(14)        |
| C00G | 23.1(17)        | 29.9(16)        | 17.6(14)        | -0.8(12)        | -1.4(11)        | -6.2(13)        |
| C00H | 22.3(15)        | 19.9(14)        | 19.6(13)        | 0.6(10)         | -2.3(11)        | -3.8(12)        |
| C00I | 17.1(15)        | 27.0(16)        | 21.7(14)        | 2.9(12)         | 3.2(12)         | -0.9(13)        |
| C00J | 14.3(14)        | 17.5(14)        | 20.6(13)        | 3.5(11)         | 1.0(10)         | 2.1(11)         |
| C00K | 21.0(16)        | 35.1(18)        | 19.8(14)        | 4.8(12)         | 2.3(12)         | 4.7(14)         |
| C00L | 23.4(17)        | 39.6(19)        | 26.8(15)        | 3.2(14)         | 12.3(14)        | -1.6(15)        |
| C00M | 34.0(18)        | 32.2(16)        | 18.1(13)        | 1.3(14)         | 7.6(12)         | 2.1(17)         |

$^1\text{H}$ ,  $^{13}\text{C}\{^1\text{H}\}$  (75.5 MHz),  $^{19}\text{F}$  and  $^{31}\text{P}$  NMR spectra of cyclobutanones, 1a-n, 3a-n, 4a, 4i and catalysts 2a-b and 2k-m in  $\text{CDCl}_3$ .

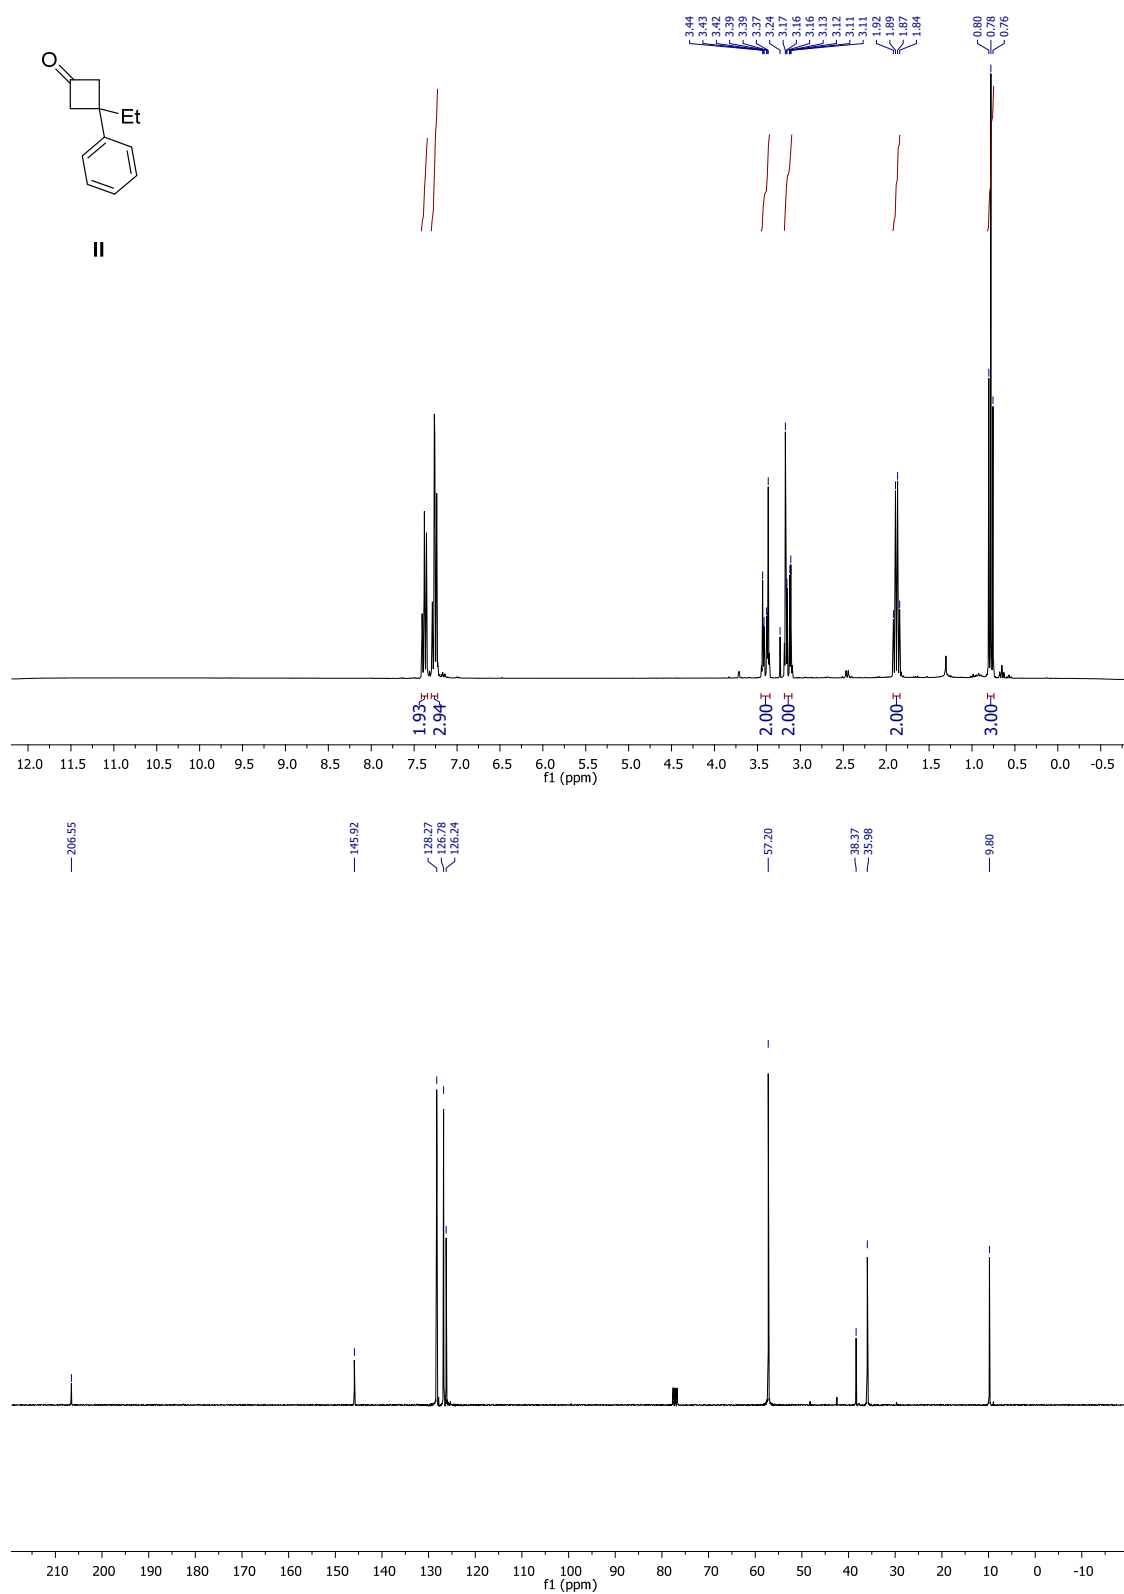

**Figure S9.**  $^1\text{H}$ -NMR (300MHz,  $\text{CDCl}_3$ ) and  $^{13}\text{C}\{^1\text{H}\}$ -NMR (75.5MHz,  $\text{CDCl}_3$ ) of compound **II**

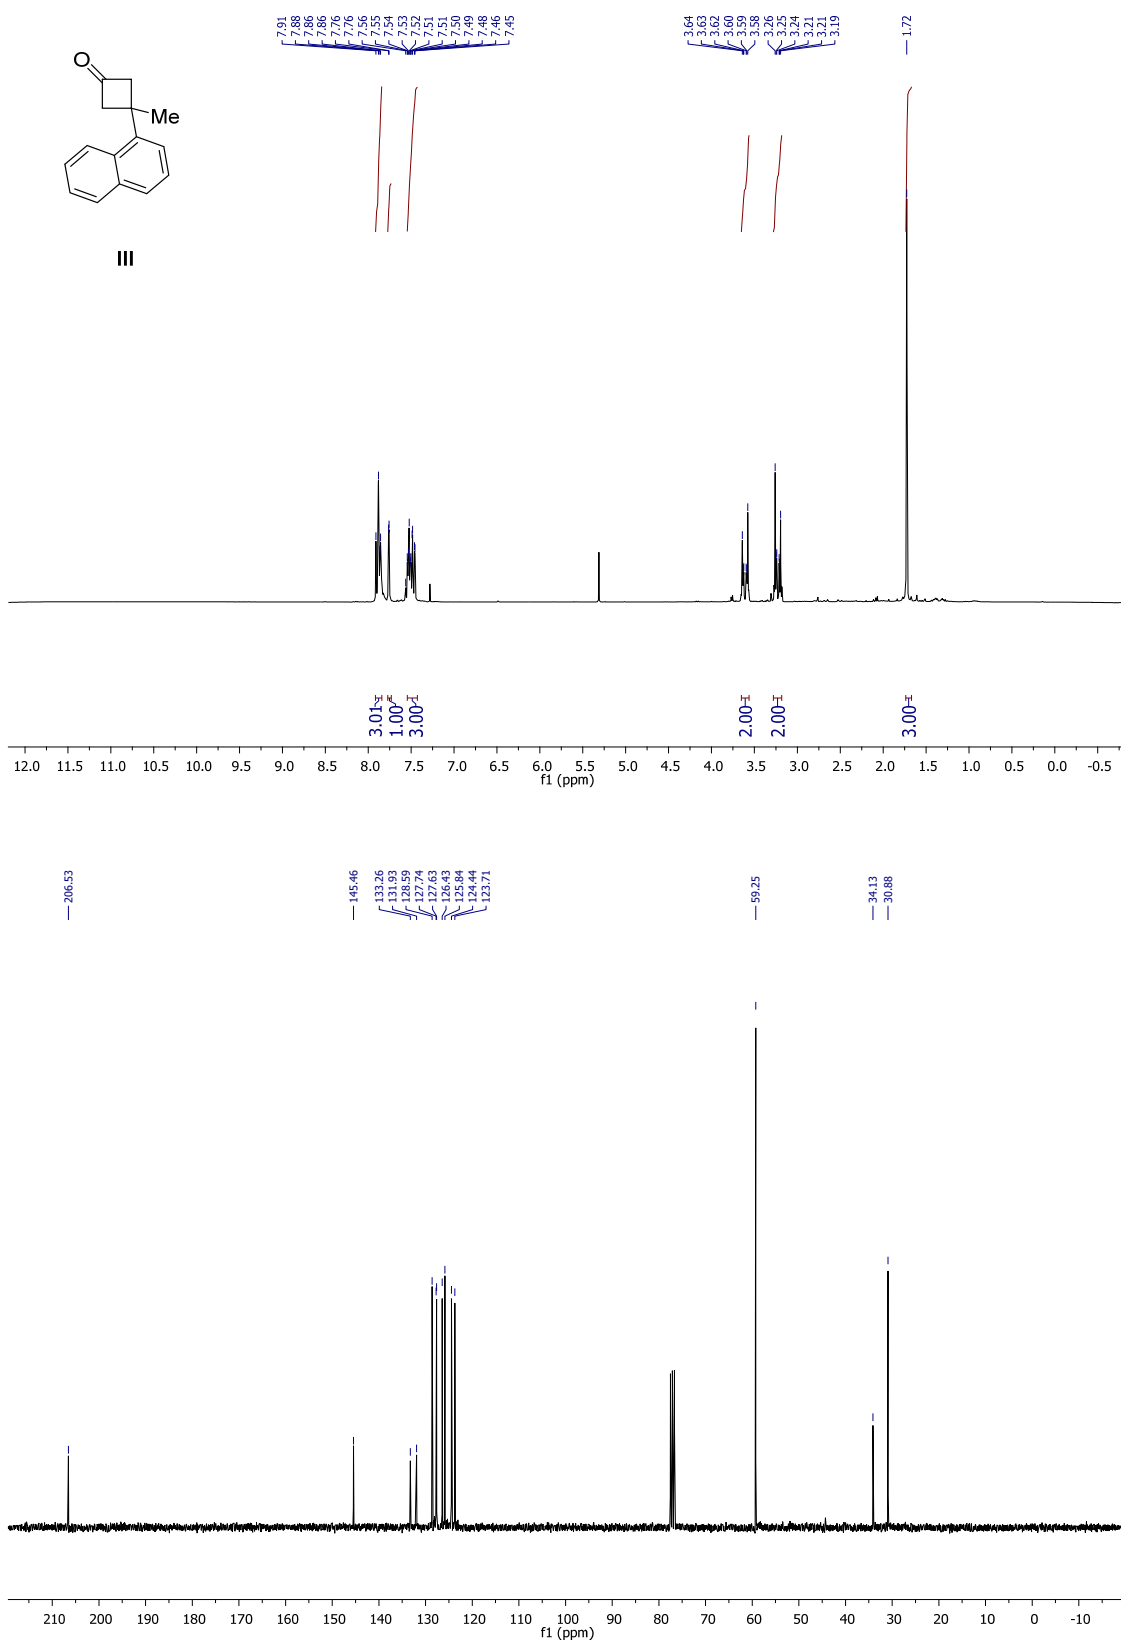

**Figure S10.**  $^1\text{H-NMR}$  (300MHz,  $\text{CDCl}_3$ ) and  $^{13}\text{C}\{^1\text{H}\}$ -NMR (75.5MHz,  $\text{CDCl}_3$ ) of compound **III**

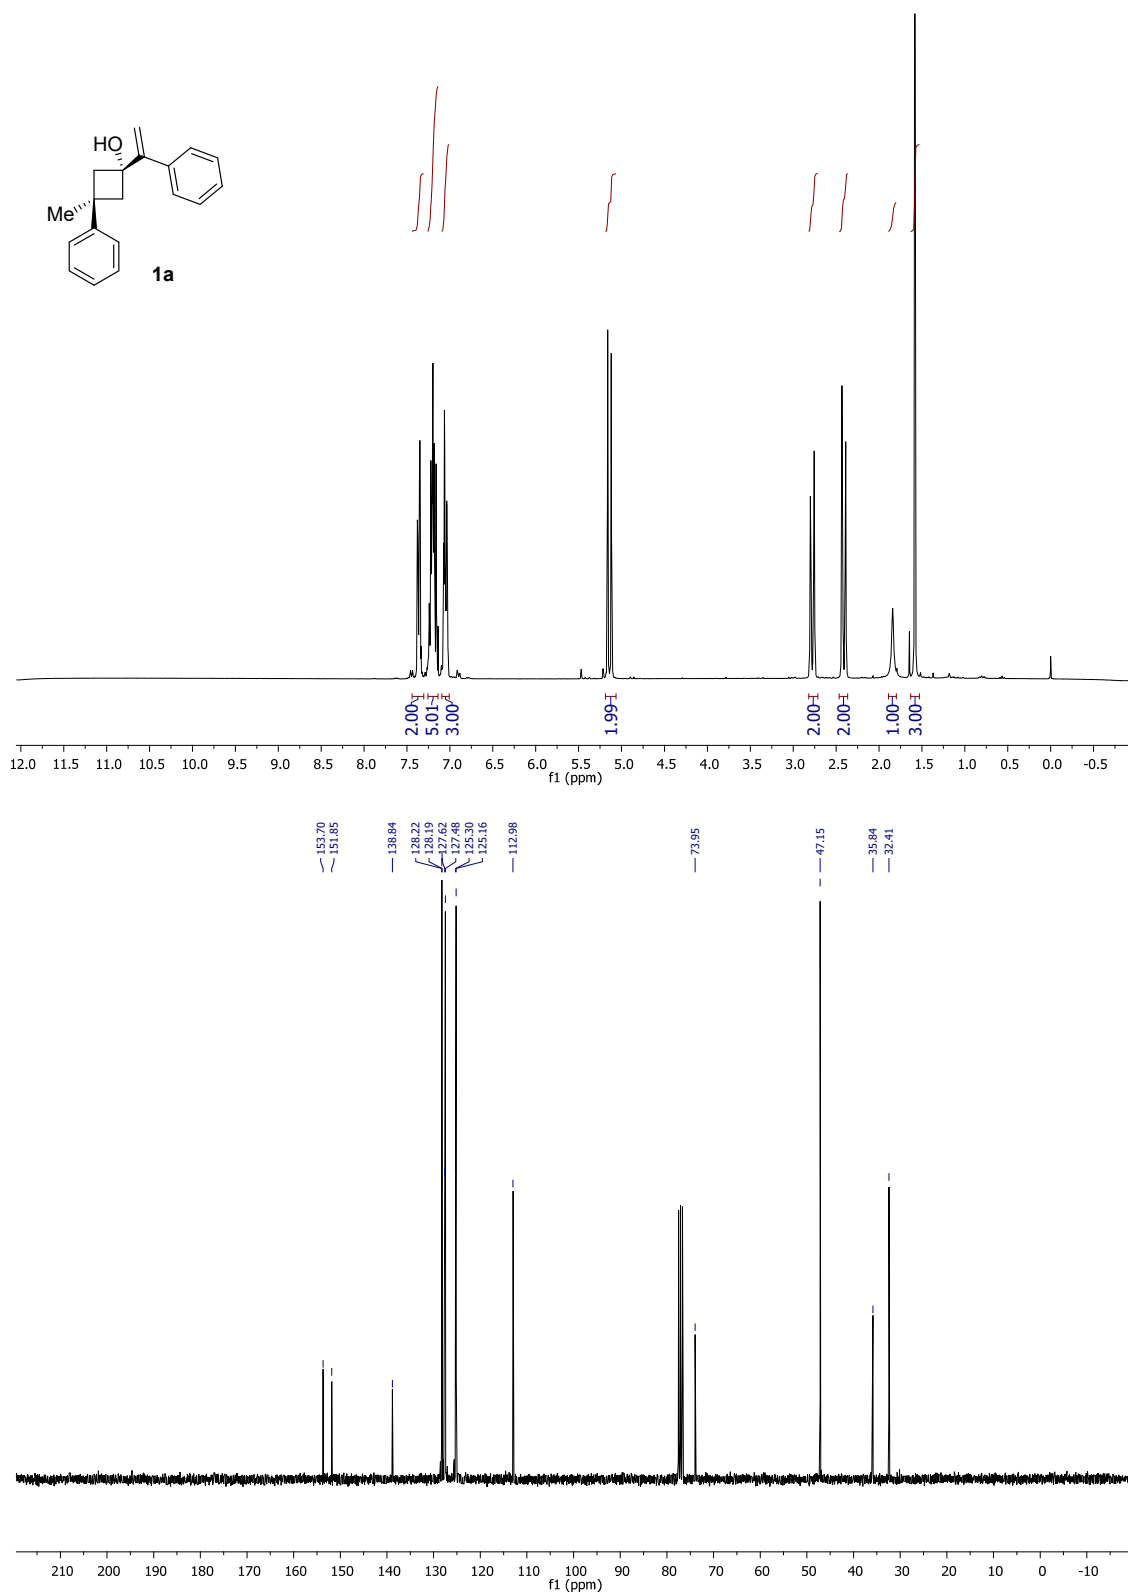

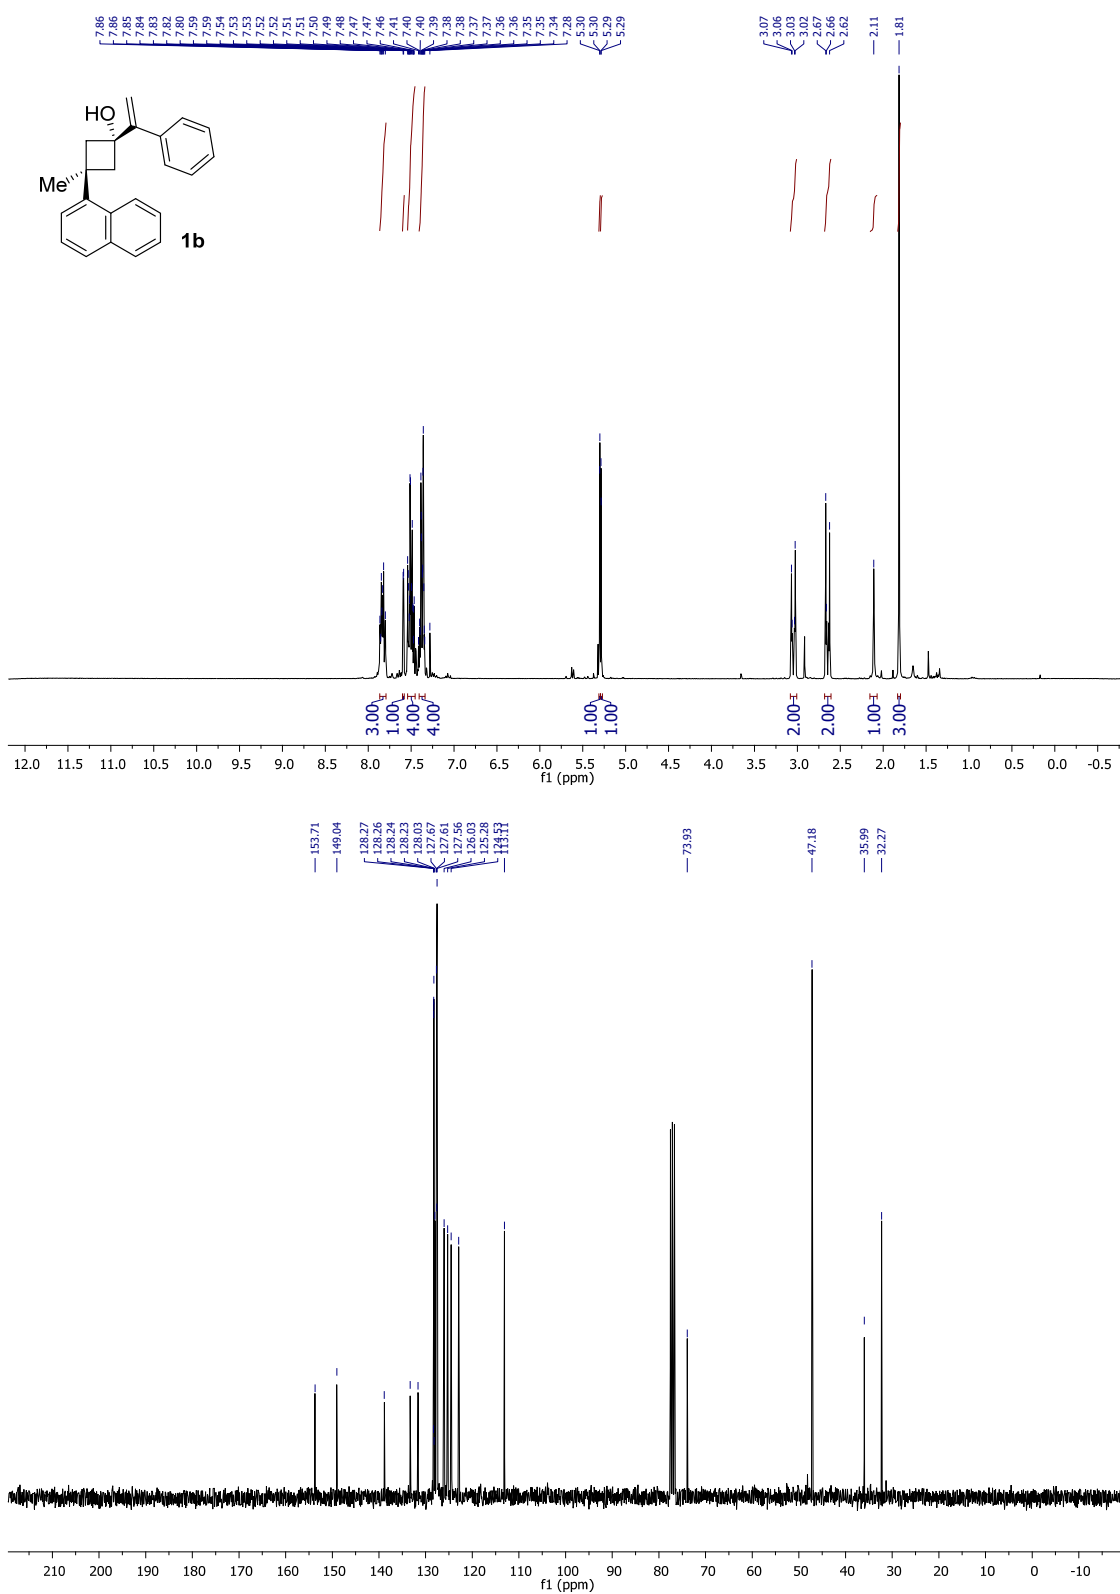

**Figure S12.** <sup>1</sup>H-NMR (300MHz, CDCl<sub>3</sub>) and <sup>13</sup>C{<sup>1</sup>H}-NMR (75.5MHz, CDCl<sub>3</sub>) of compound **1b**

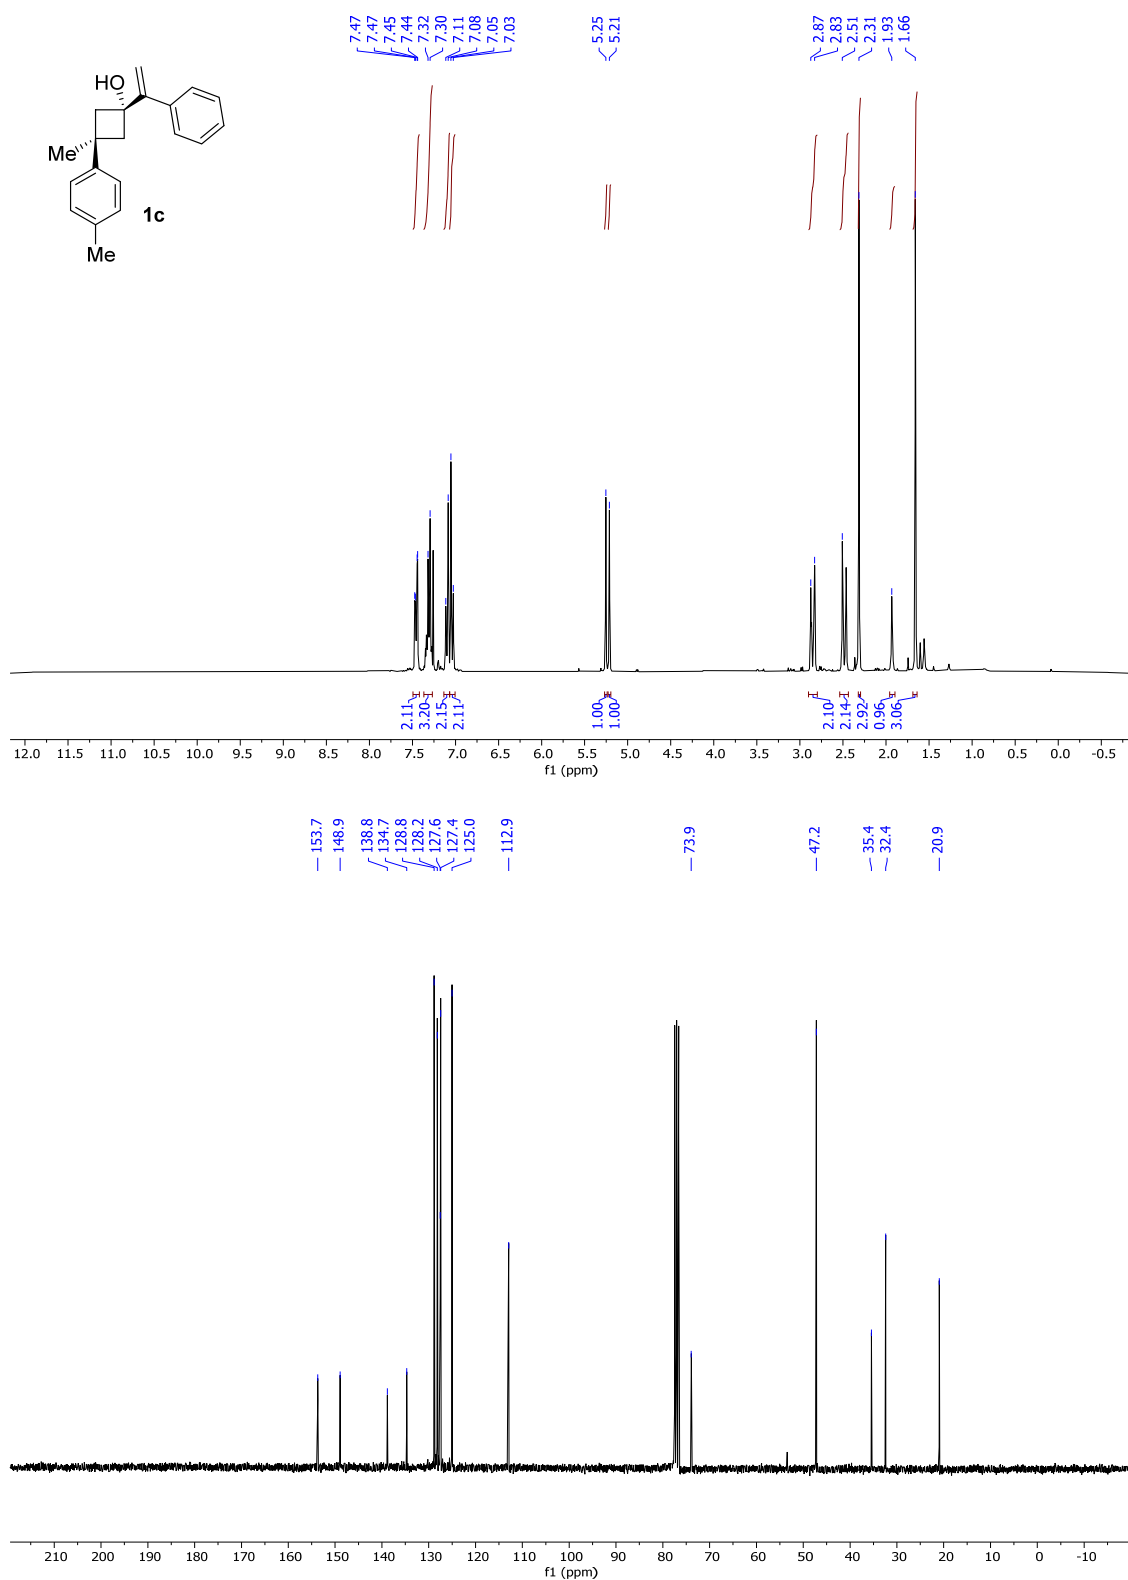

**Figure S13.** <sup>1</sup>H-NMR (300MHz, CDCl<sub>3</sub>) and <sup>13</sup>C{<sup>1</sup>H}-NMR (75.5MHz, CDCl<sub>3</sub>) of compound **1c**

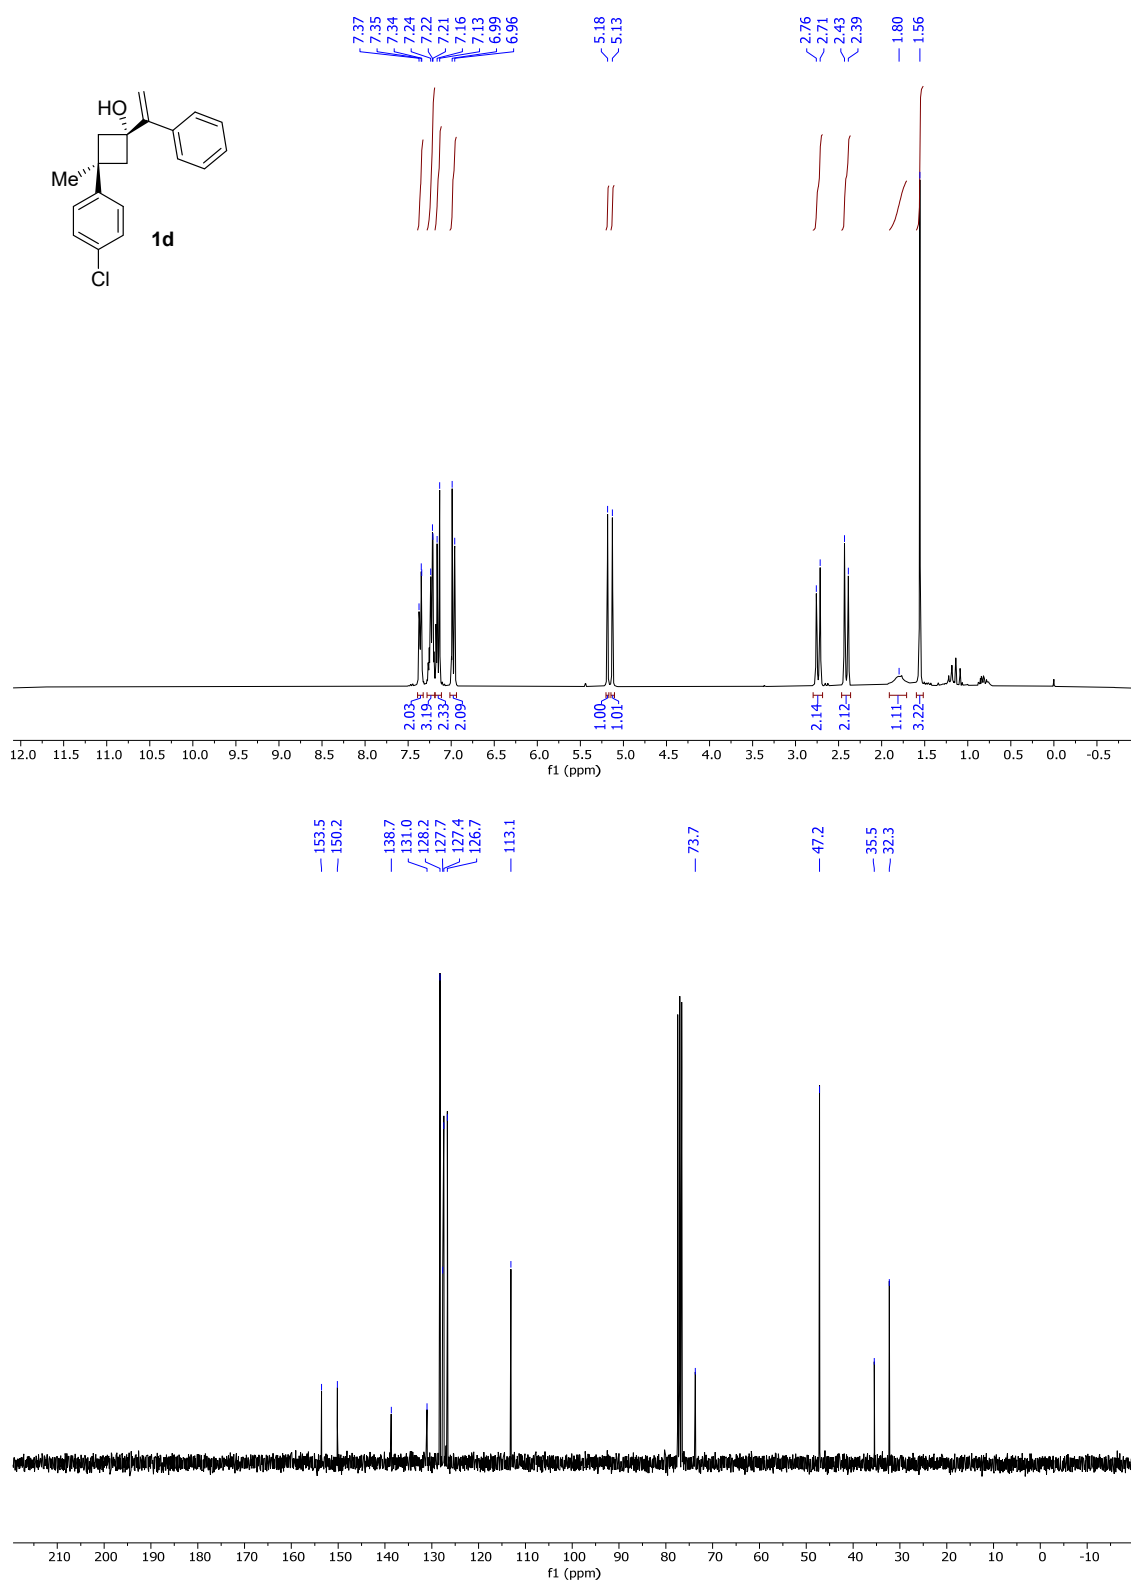

**Figure S14.** <sup>1</sup>H-NMR (300MHz, CDCl<sub>3</sub>) and <sup>13</sup>C{<sup>1</sup>H}-NMR (75.5MHz, CDCl<sub>3</sub>) of compound **1d**

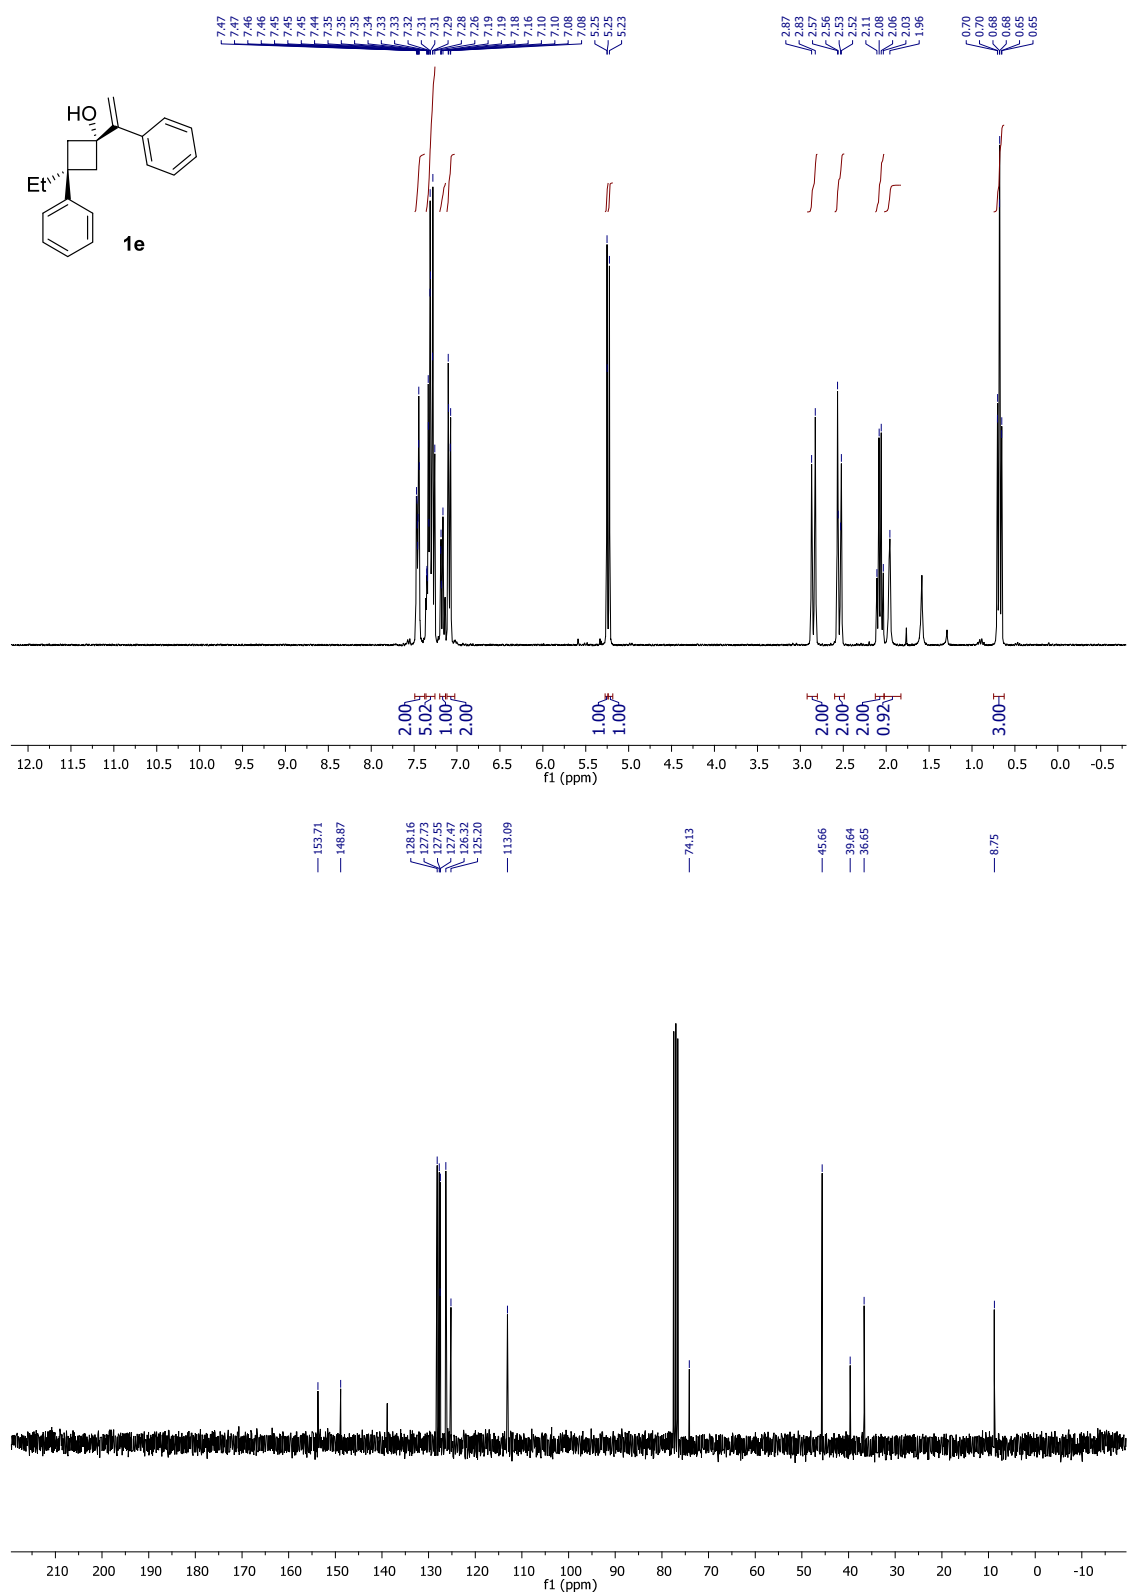

**Figure S15.** <sup>1</sup>H-NMR (300MHz, CDCl<sub>3</sub>) and <sup>13</sup>C{<sup>1</sup>H}-NMR (75.5MHz, CDCl<sub>3</sub>) of compound **1e**



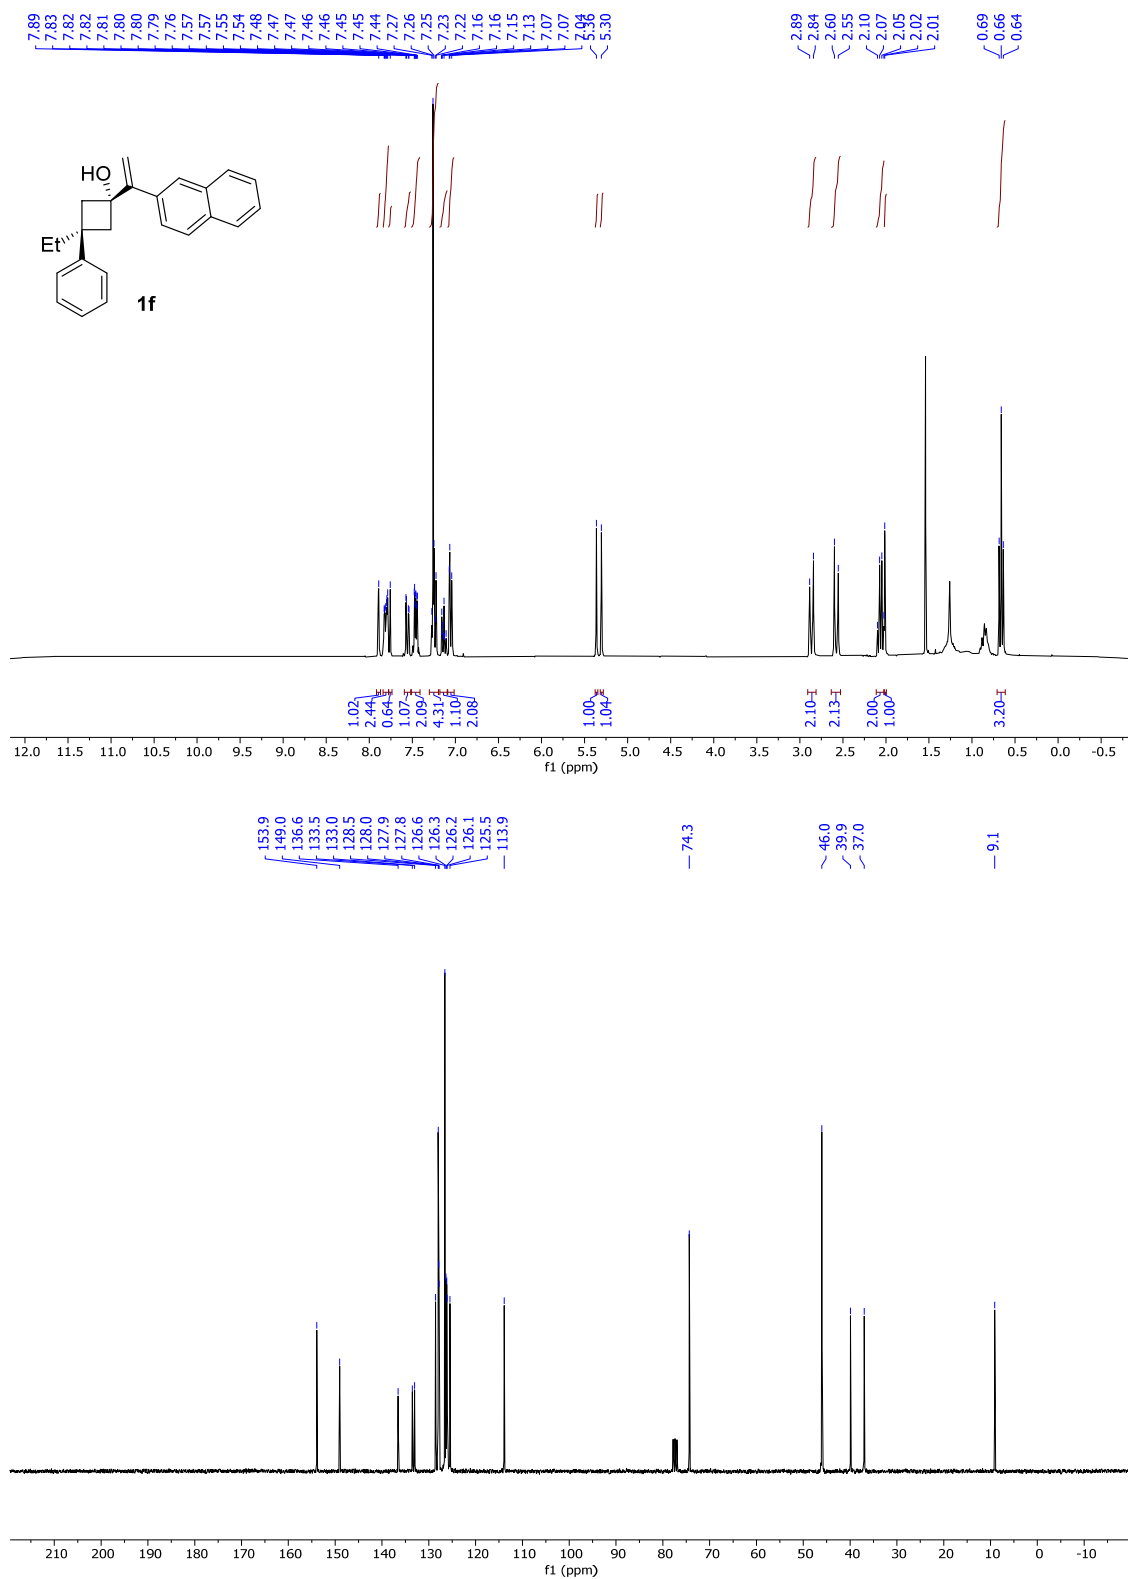

**Figure S16.** <sup>1</sup>H-NMR (300MHz, CDCl<sub>3</sub>) and <sup>13</sup>C{<sup>1</sup>H}-NMR (75.5MHz, CDCl<sub>3</sub>) of compound **1f**

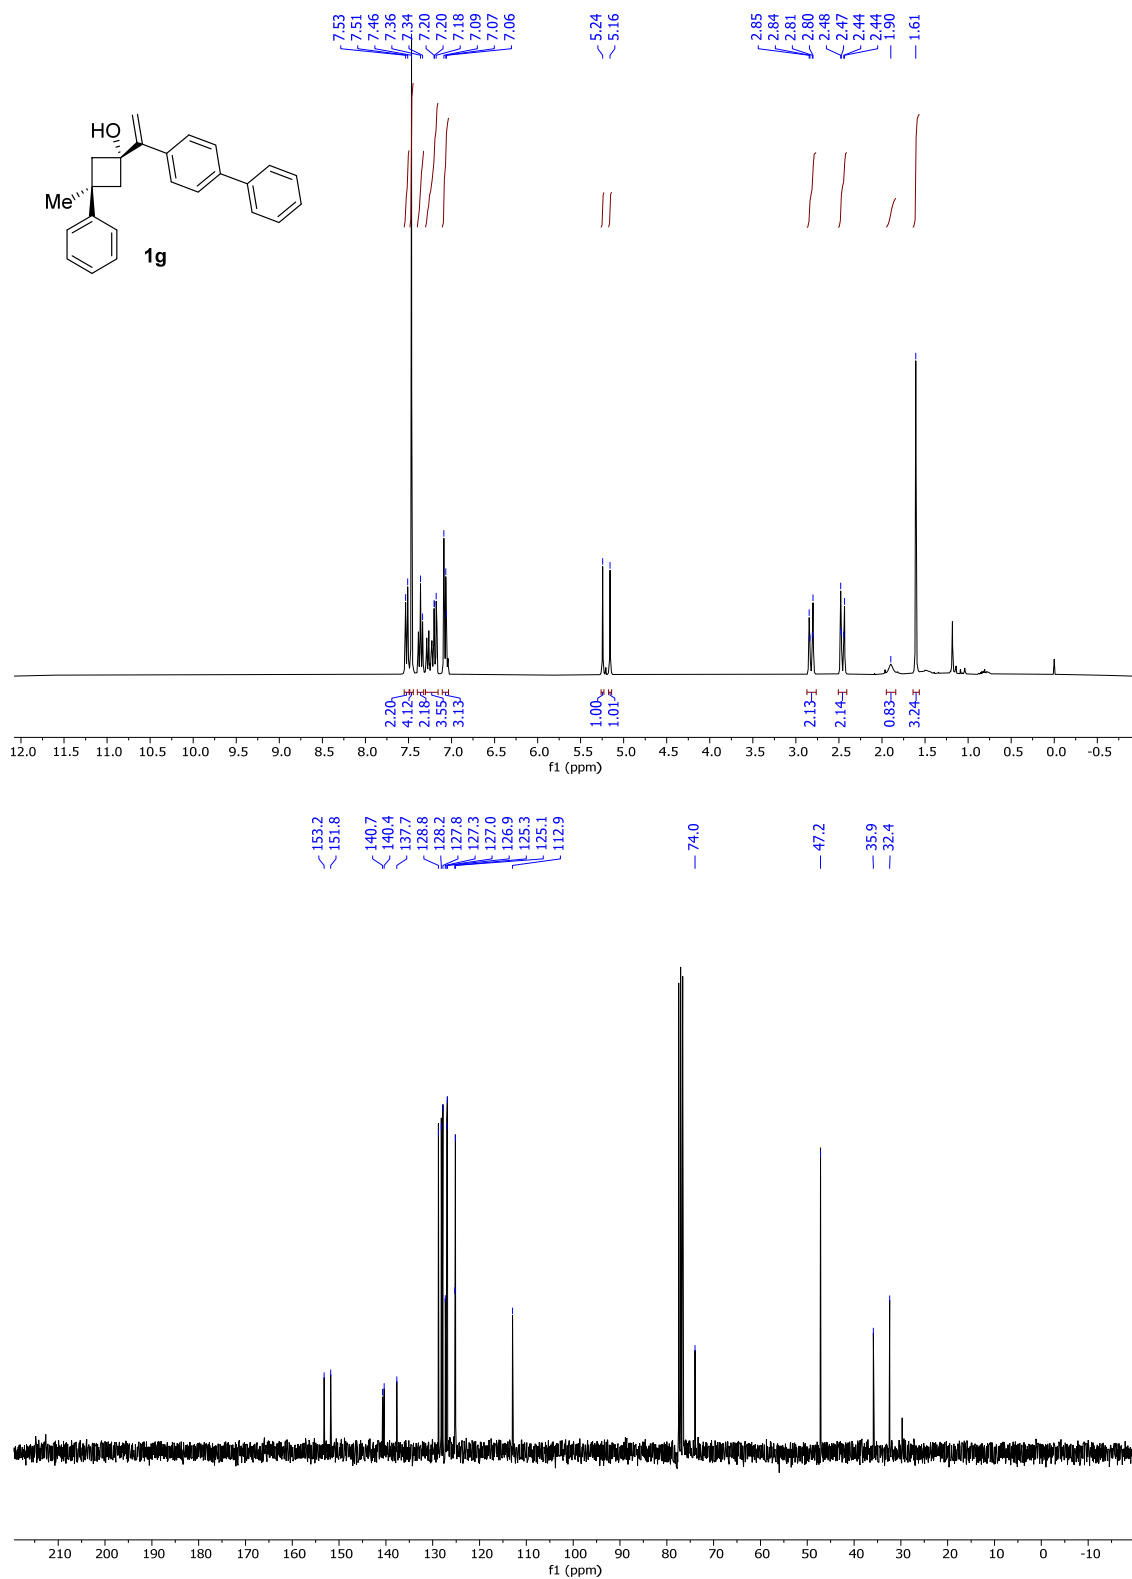

**Figure S17.** <sup>1</sup>H-NMR (300MHz, CDCl<sub>3</sub>) and <sup>13</sup>C{<sup>1</sup>H}-NMR (75.5MHz, CDCl<sub>3</sub>) of compound **1g**

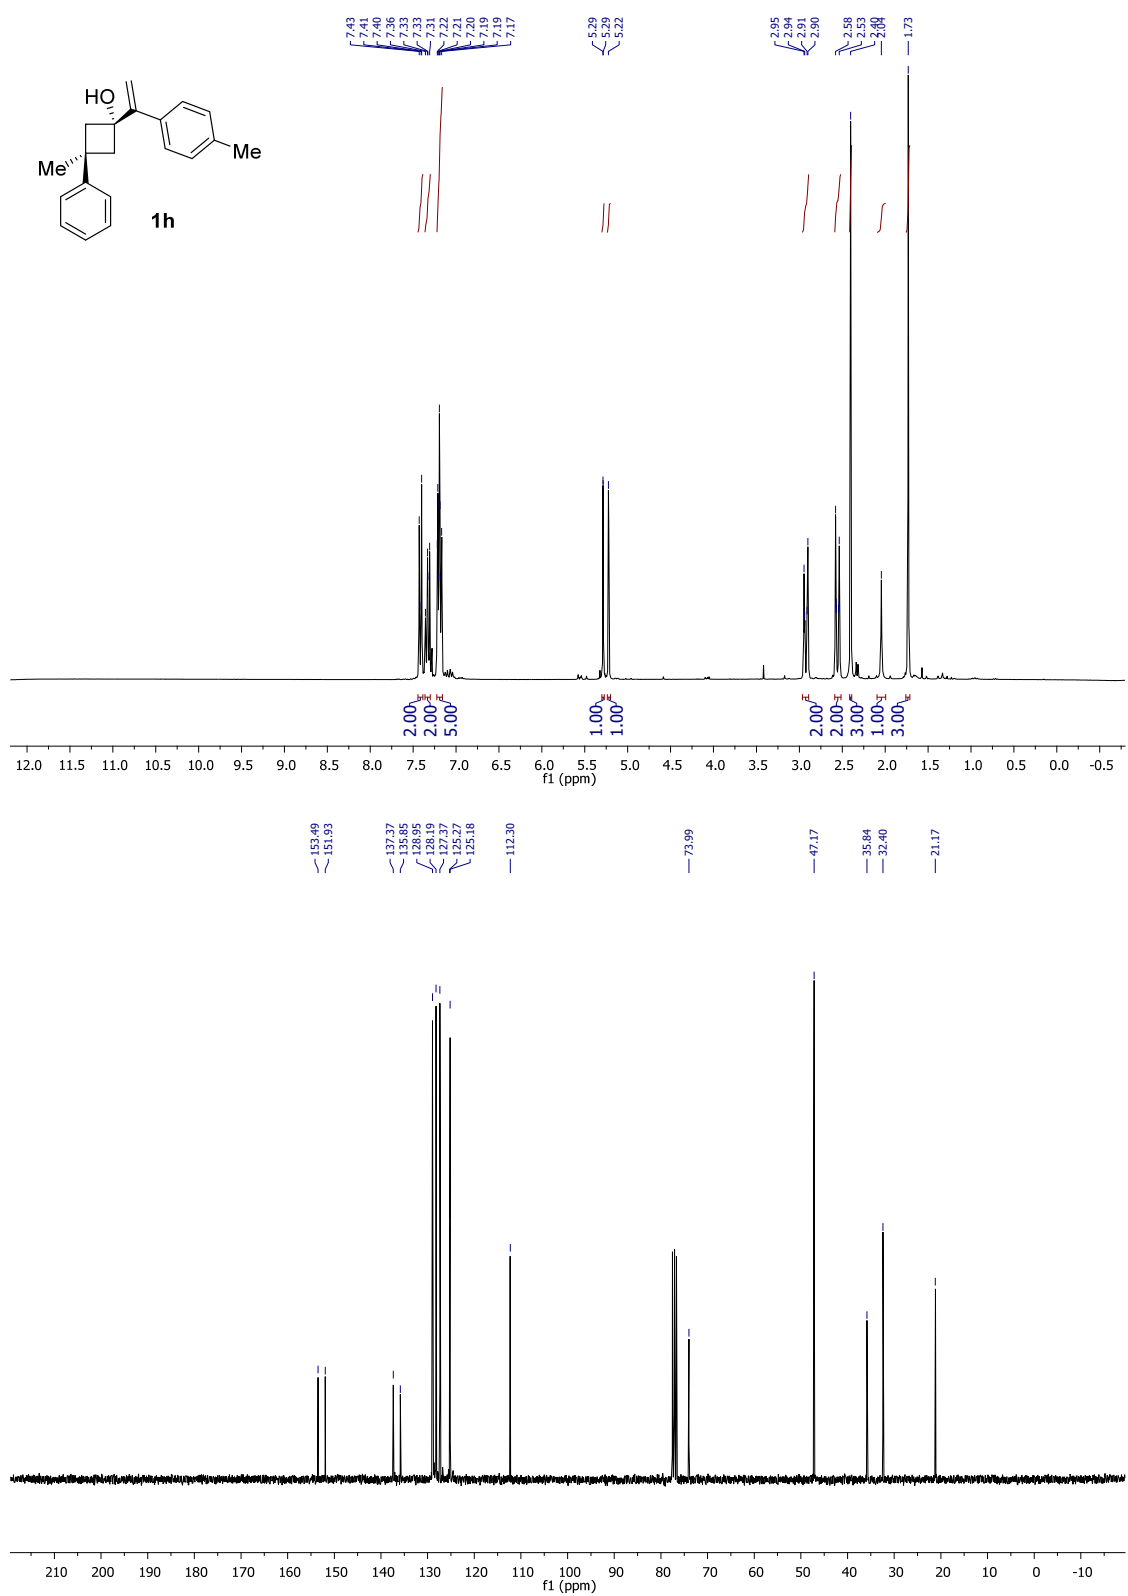

**Figure S18.** <sup>1</sup>H-NMR (300MHz, CDCl<sub>3</sub>) and <sup>13</sup>C{<sup>1</sup>H}-NMR (75.5MHz, CDCl<sub>3</sub>) of compound **1h**

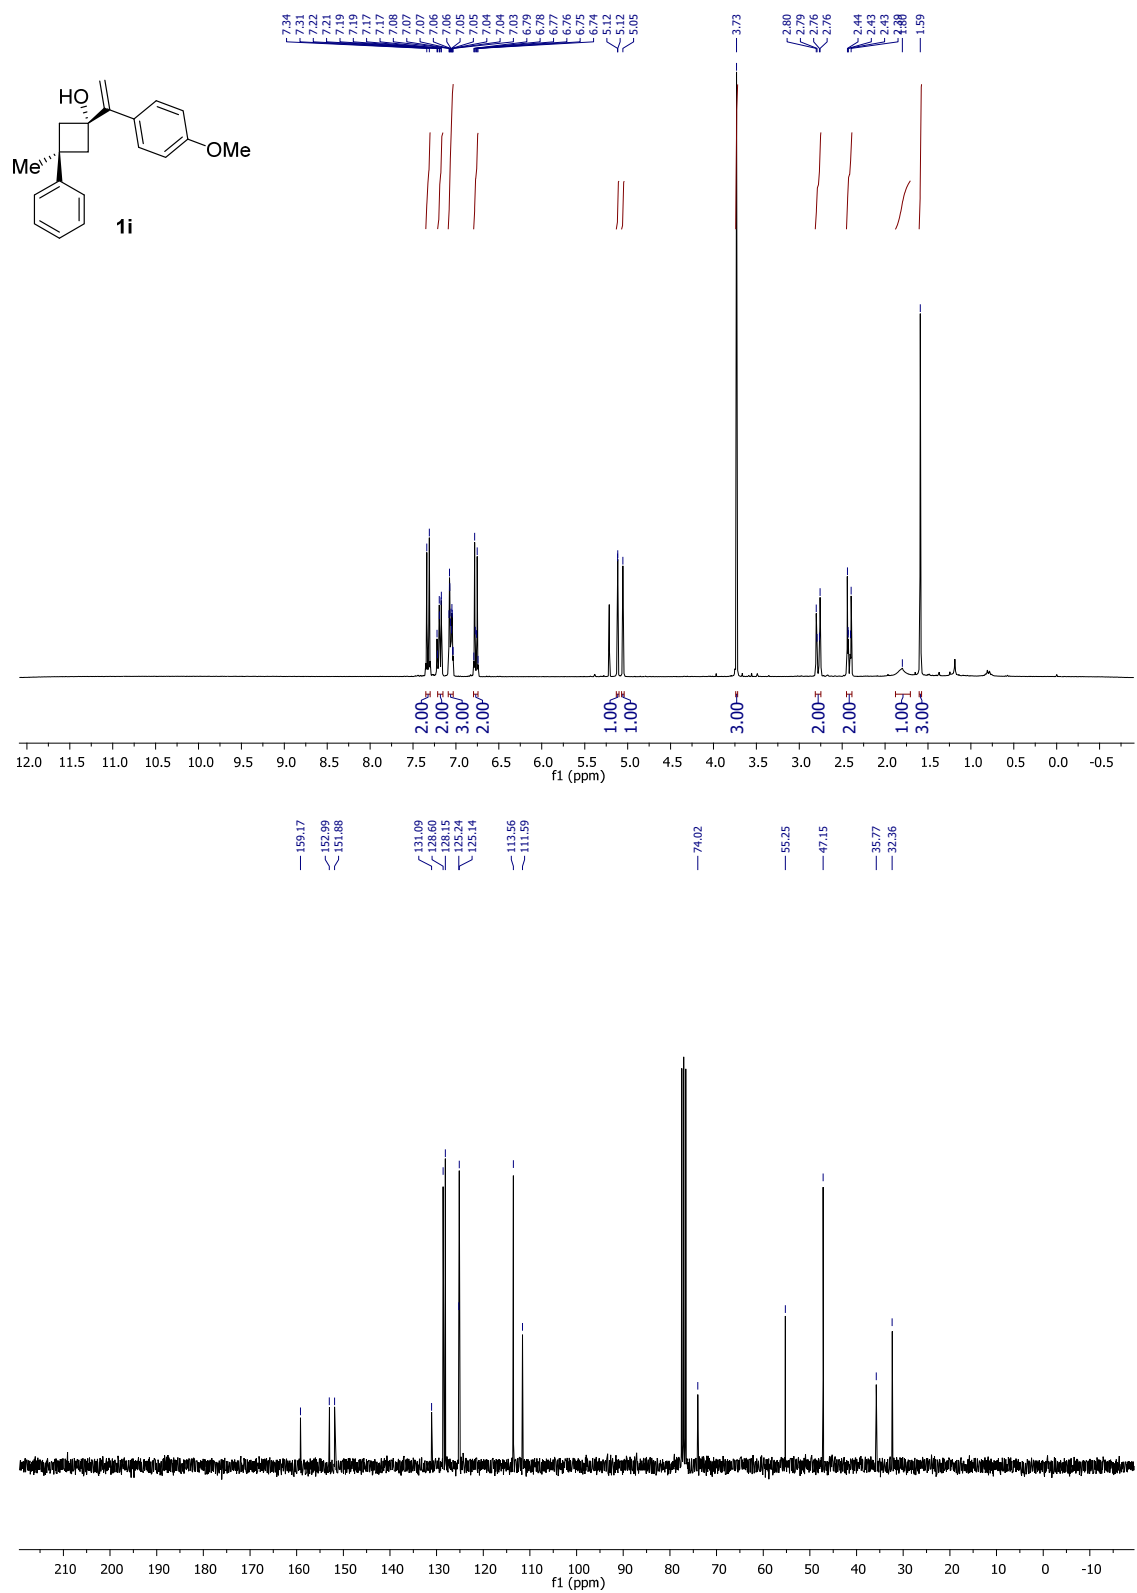

**Figure S19.** <sup>1</sup>H-NMR (300MHz, CDCl<sub>3</sub>) and <sup>13</sup>C{<sup>1</sup>H}-NMR (75.5MHz, CDCl<sub>3</sub>) of compound **1i**

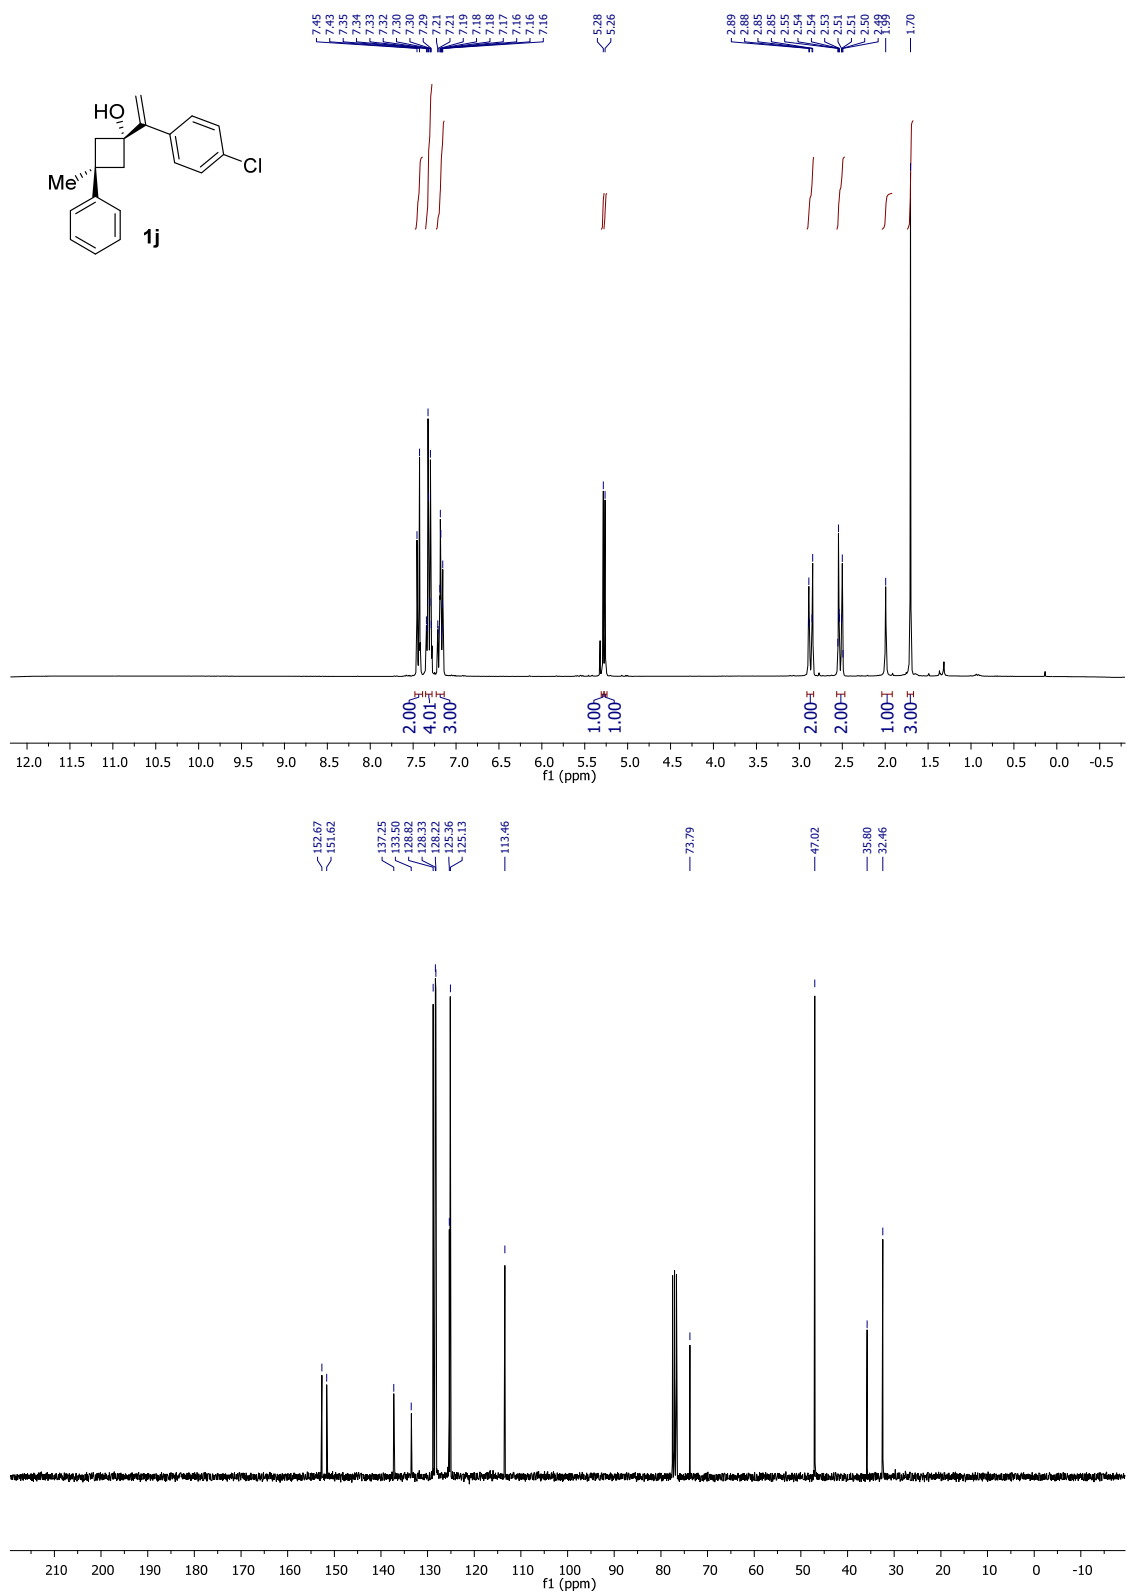

**Figure S20.** <sup>1</sup>H-NMR (300MHz, CDCl<sub>3</sub>) and <sup>13</sup>C{<sup>1</sup>H}-NMR (75.5MHz, CDCl<sub>3</sub>) of compound **1j**

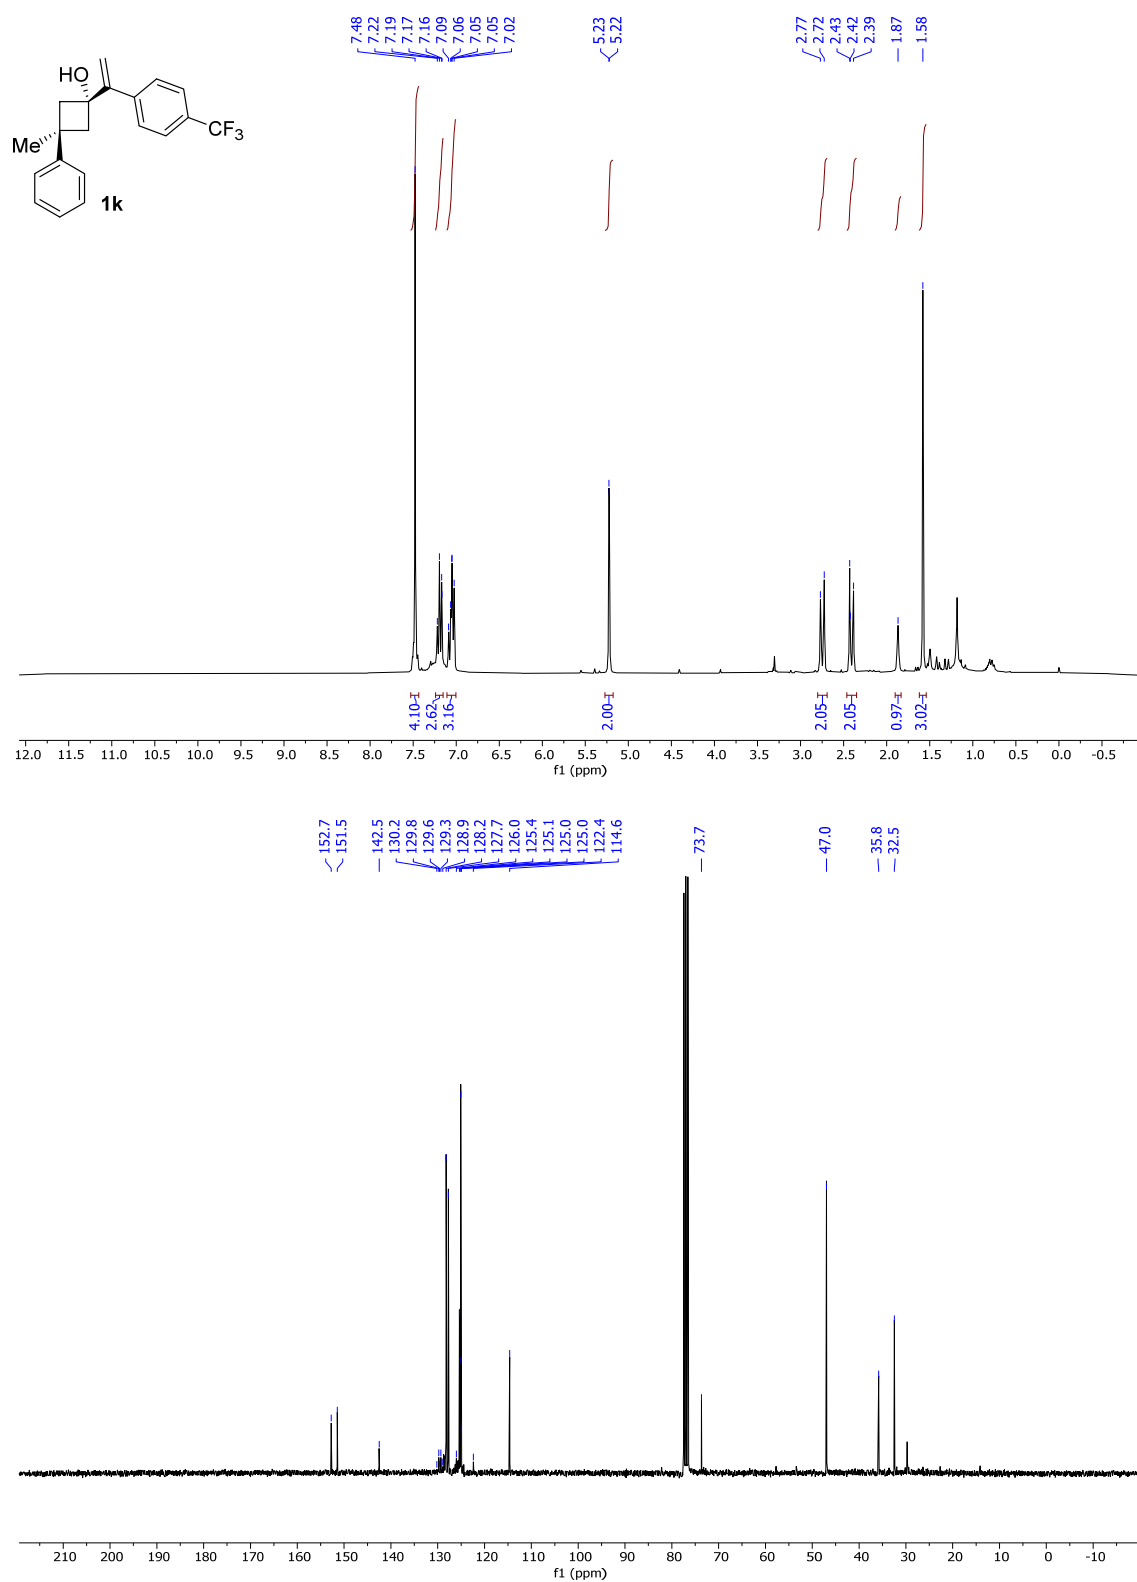

**Figure S21.**  $^1\text{H-NMR}$  (300MHz,  $\text{CDCl}_3$ ) and  $^{13}\text{C}\{^1\text{H}\}$ -NMR (75.5MHz,  $\text{CDCl}_3$ ) of compound **1k**

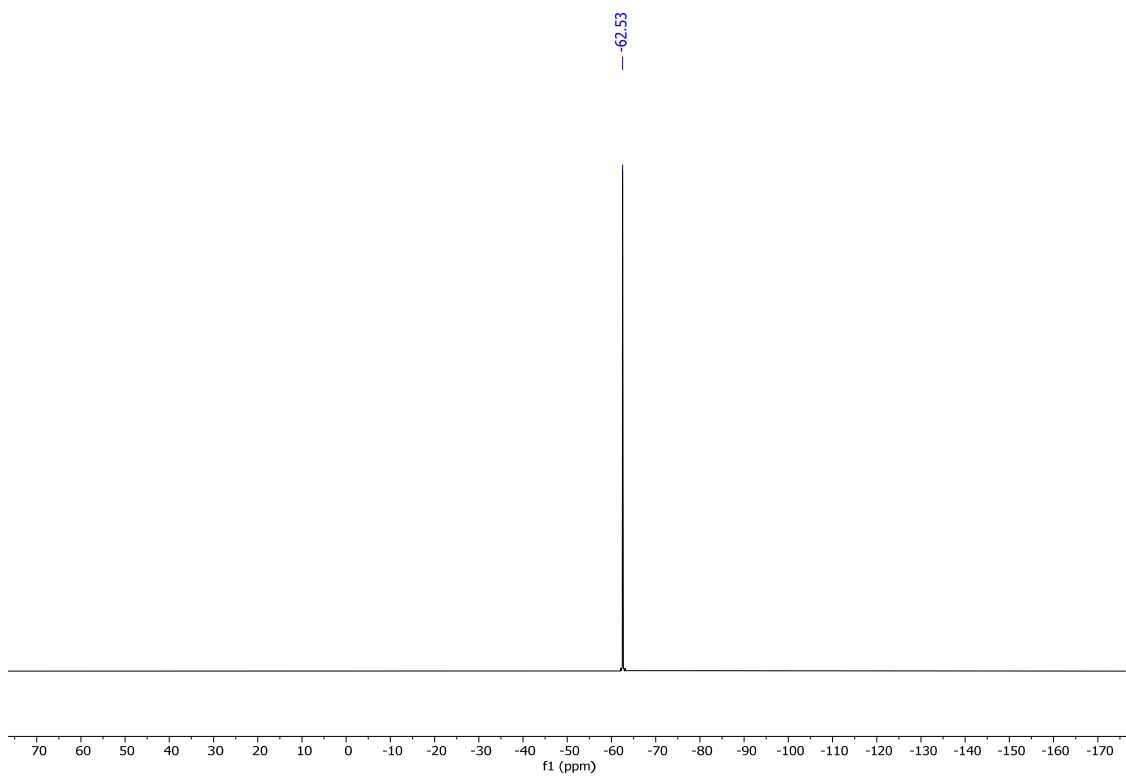

**Figure S22.**  $^{31}\text{P}$ -NMR (122MHz,  $\text{CDCl}_3$ ) of compound **1k**

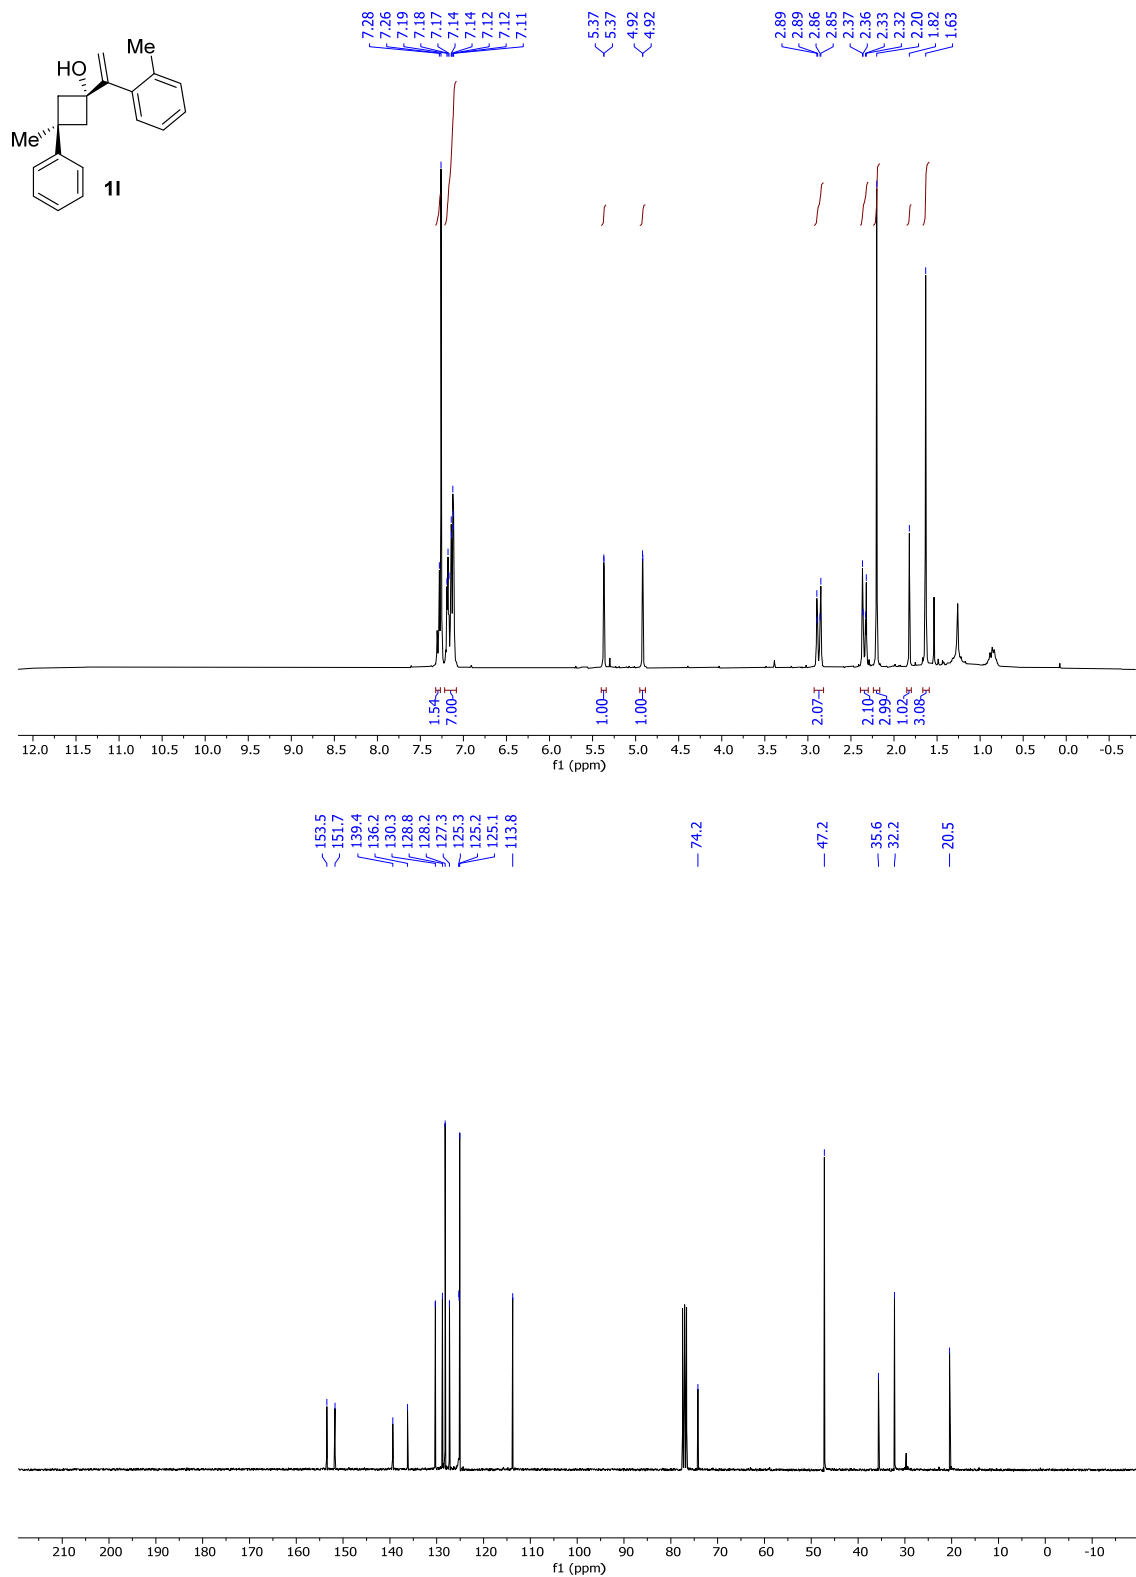

**Figure S23.** <sup>1</sup>H-NMR (300MHz, CDCl<sub>3</sub>) and <sup>13</sup>C{<sup>1</sup>H}-NMR (75.5MHz, CDCl<sub>3</sub>) of compound **11**



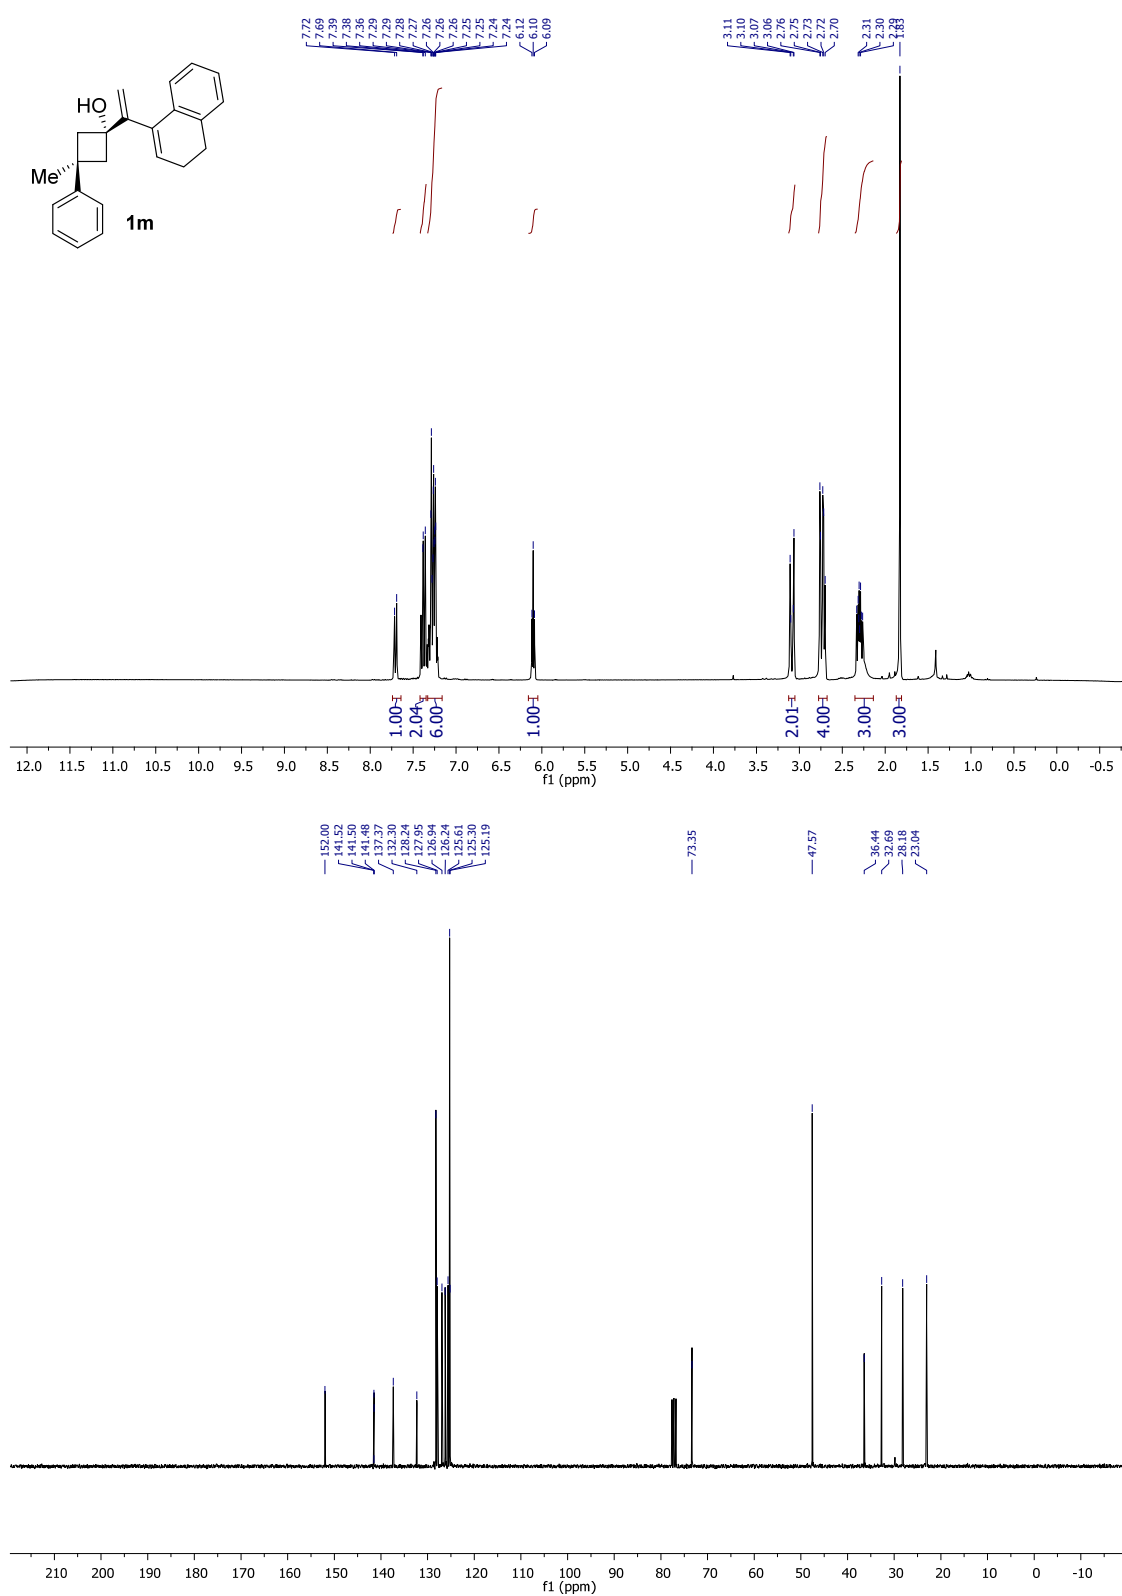

**Figure S24.** <sup>1</sup>H-NMR (300MHz, CDCl<sub>3</sub>) and <sup>13</sup>C{<sup>1</sup>H}-NMR (75.5MHz, CDCl<sub>3</sub>) of compound **1m**

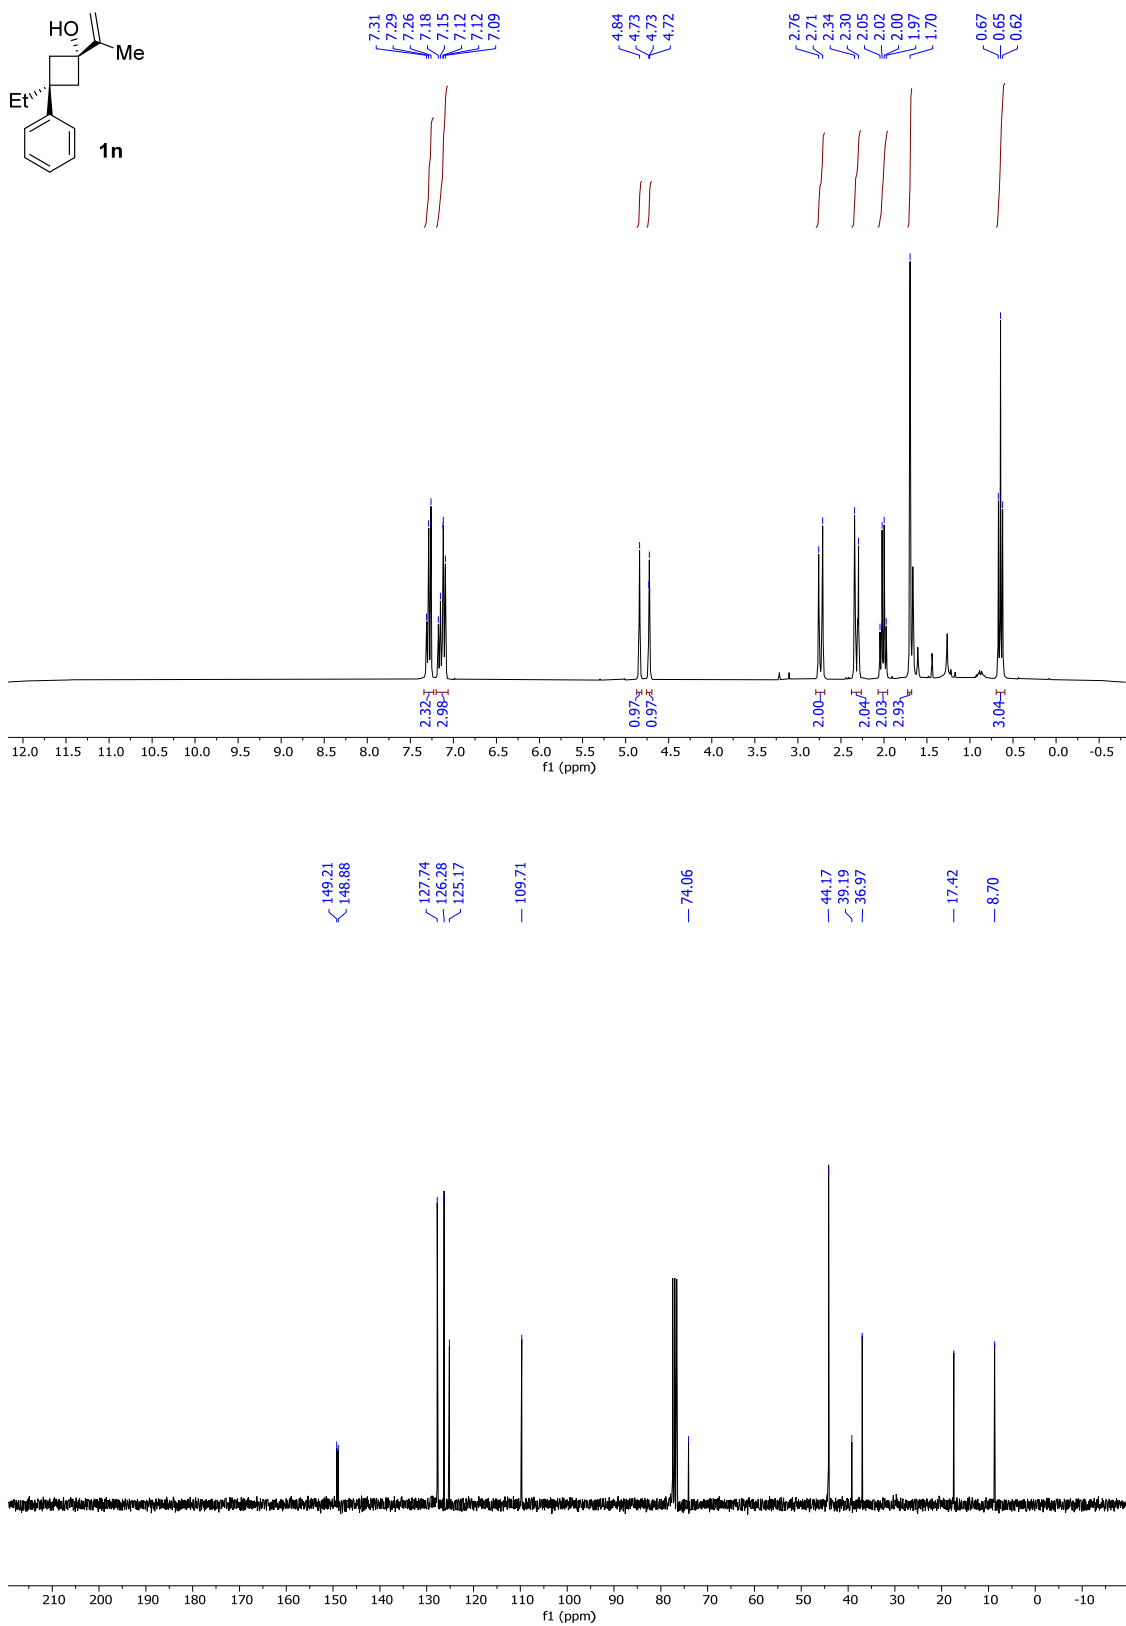

**Figure S25.** <sup>1</sup>H-NMR (300MHz, CDCl<sub>3</sub>) and <sup>13</sup>C{<sup>1</sup>H}-NMR (75.5MHz, CDCl<sub>3</sub>) of compound **1n**

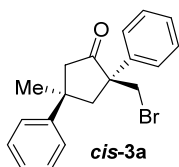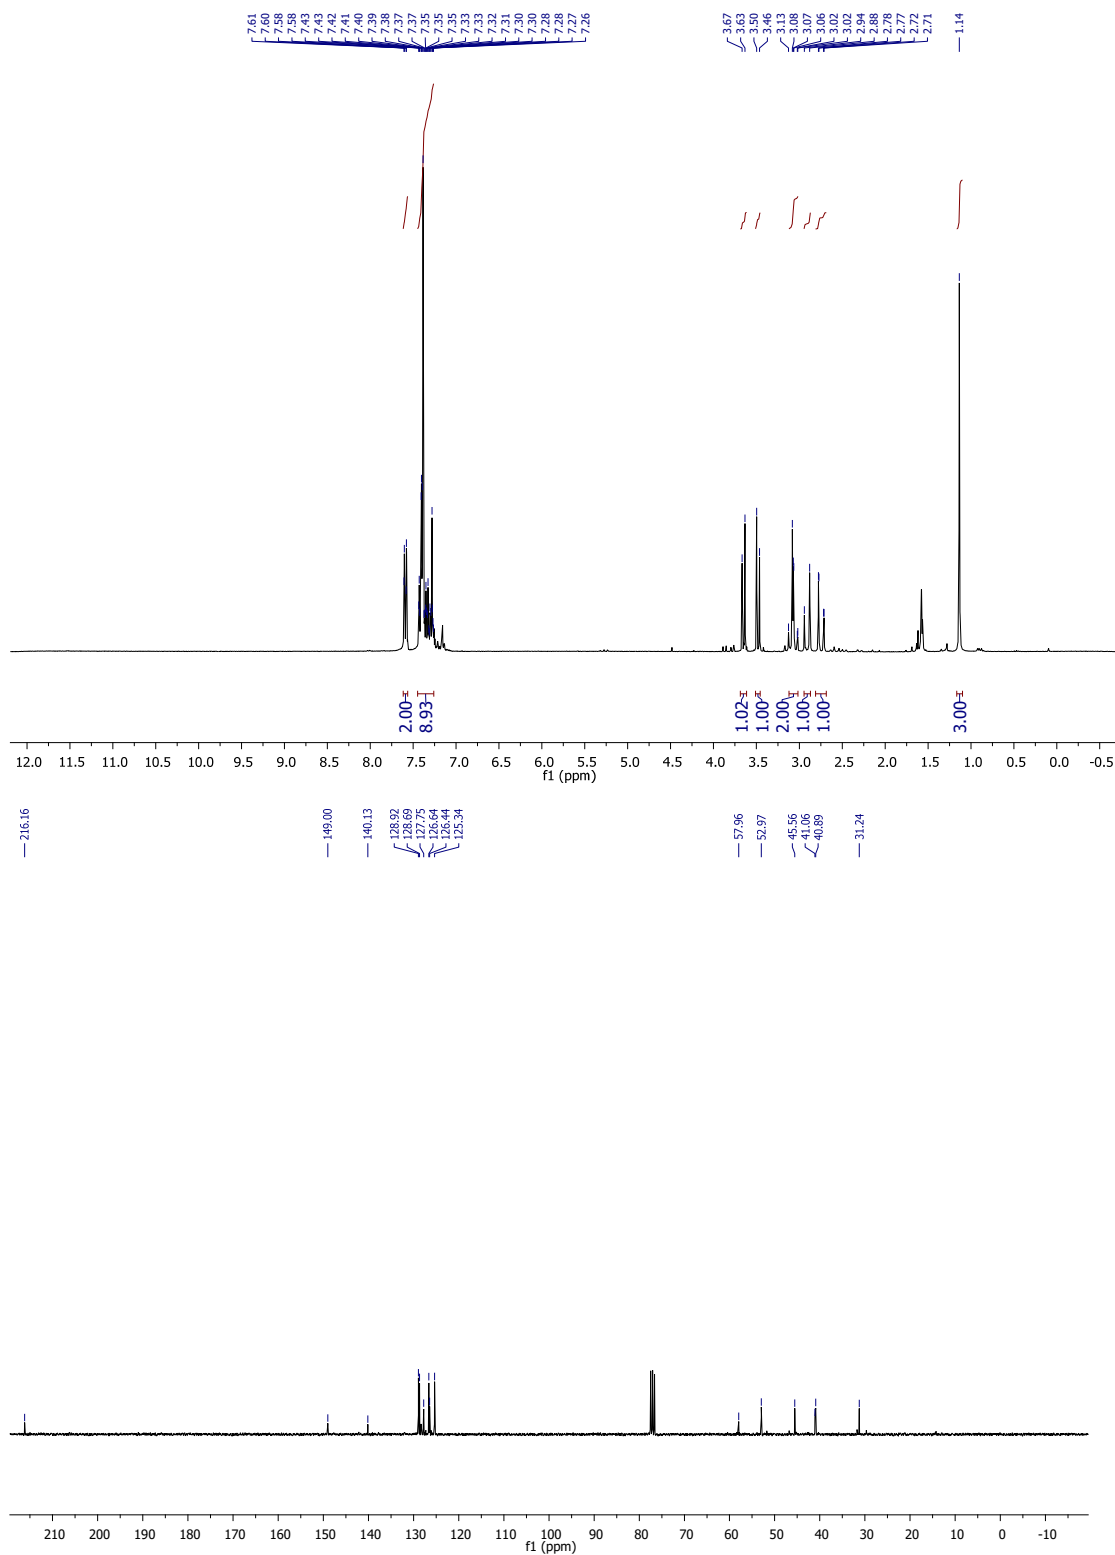

**Figure S26.**  $^1\text{H-NMR}$  (300MHz,  $\text{CDCl}_3$ ) and  $^{13}\text{C}\{^1\text{H}\}$ -NMR (75.5MHz,  $\text{CDCl}_3$ ) of compound **cis-3a**

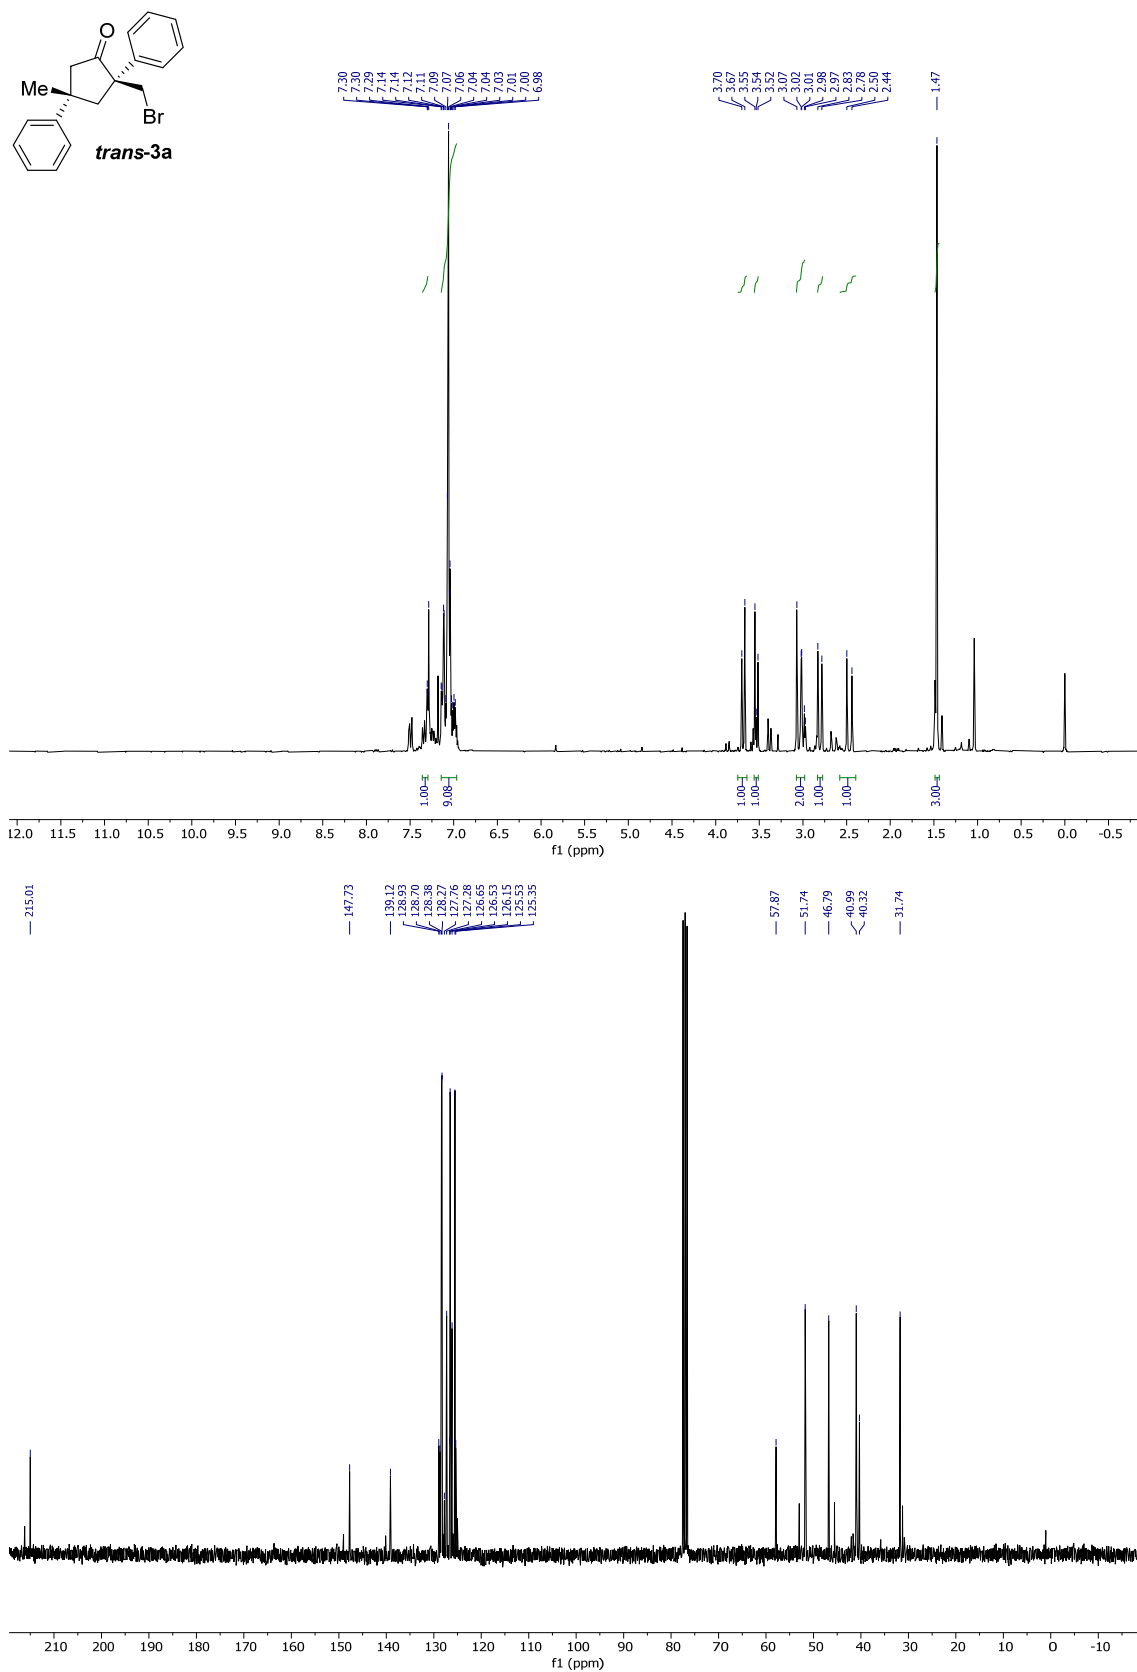

**Figure S27.** <sup>1</sup>H-NMR (300MHz, CDCl<sub>3</sub>) and <sup>13</sup>C{<sup>1</sup>H}-NMR (75.5MHz, CDCl<sub>3</sub>) of compound **trans-3a**

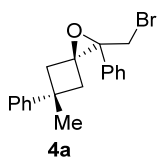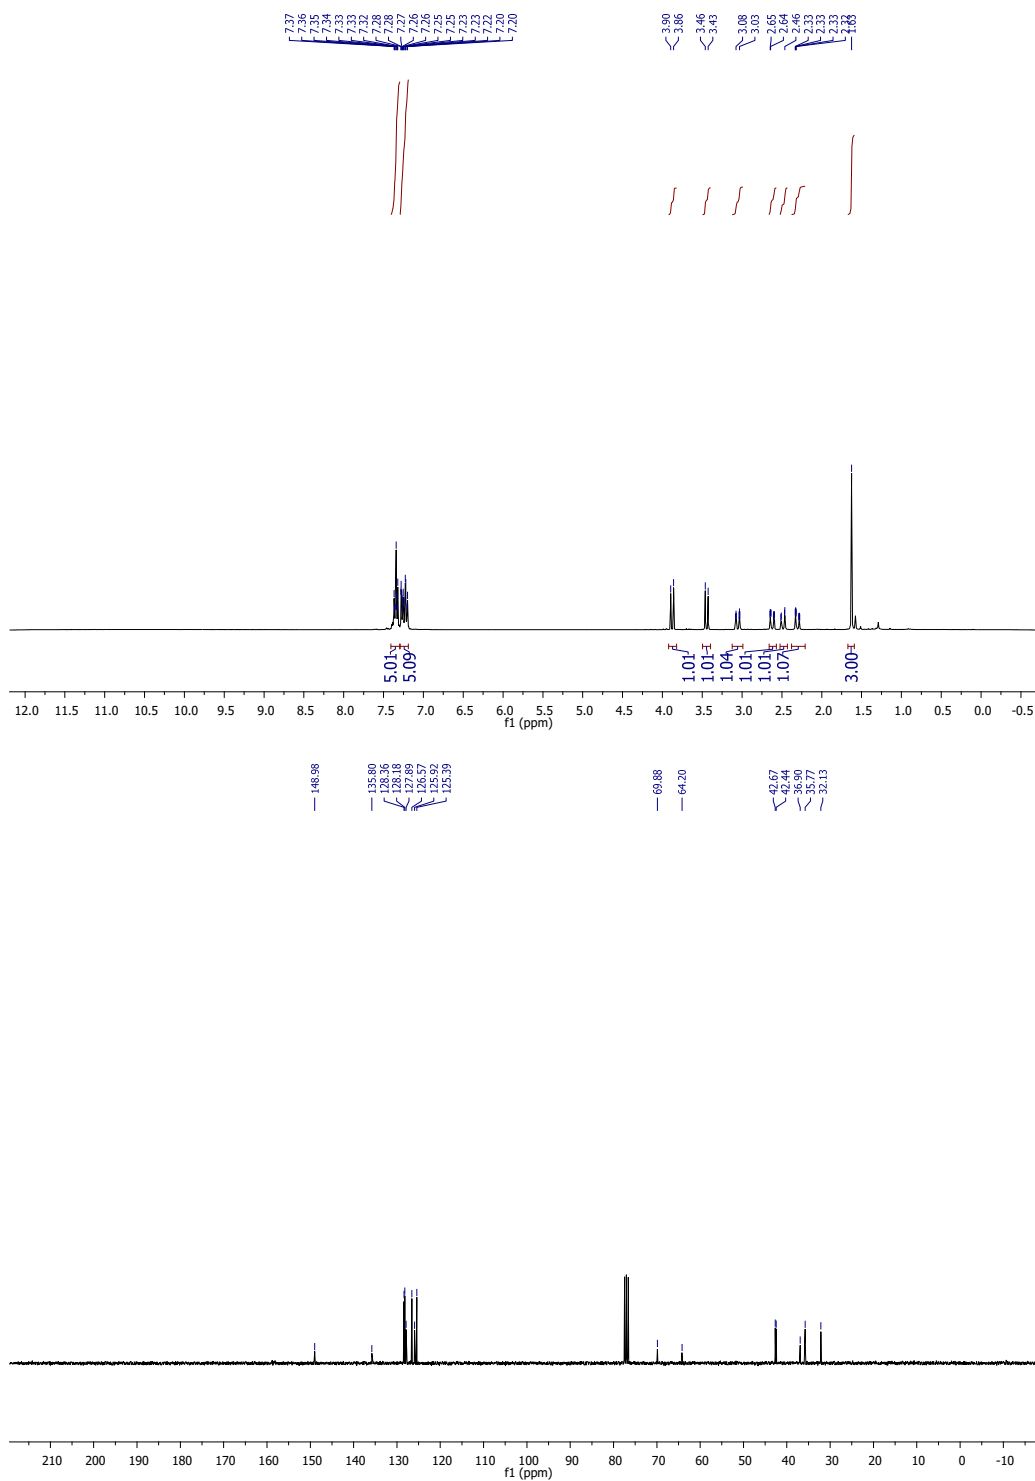

**Figure S28.**  $^1\text{H-NMR}$  (300 MHz,  $\text{CDCl}_3$ ) and  $^{13}\text{C}\{^1\text{H}\}$ -NMR (75.5 MHz,  $\text{CDCl}_3$ ) of compound **4a**

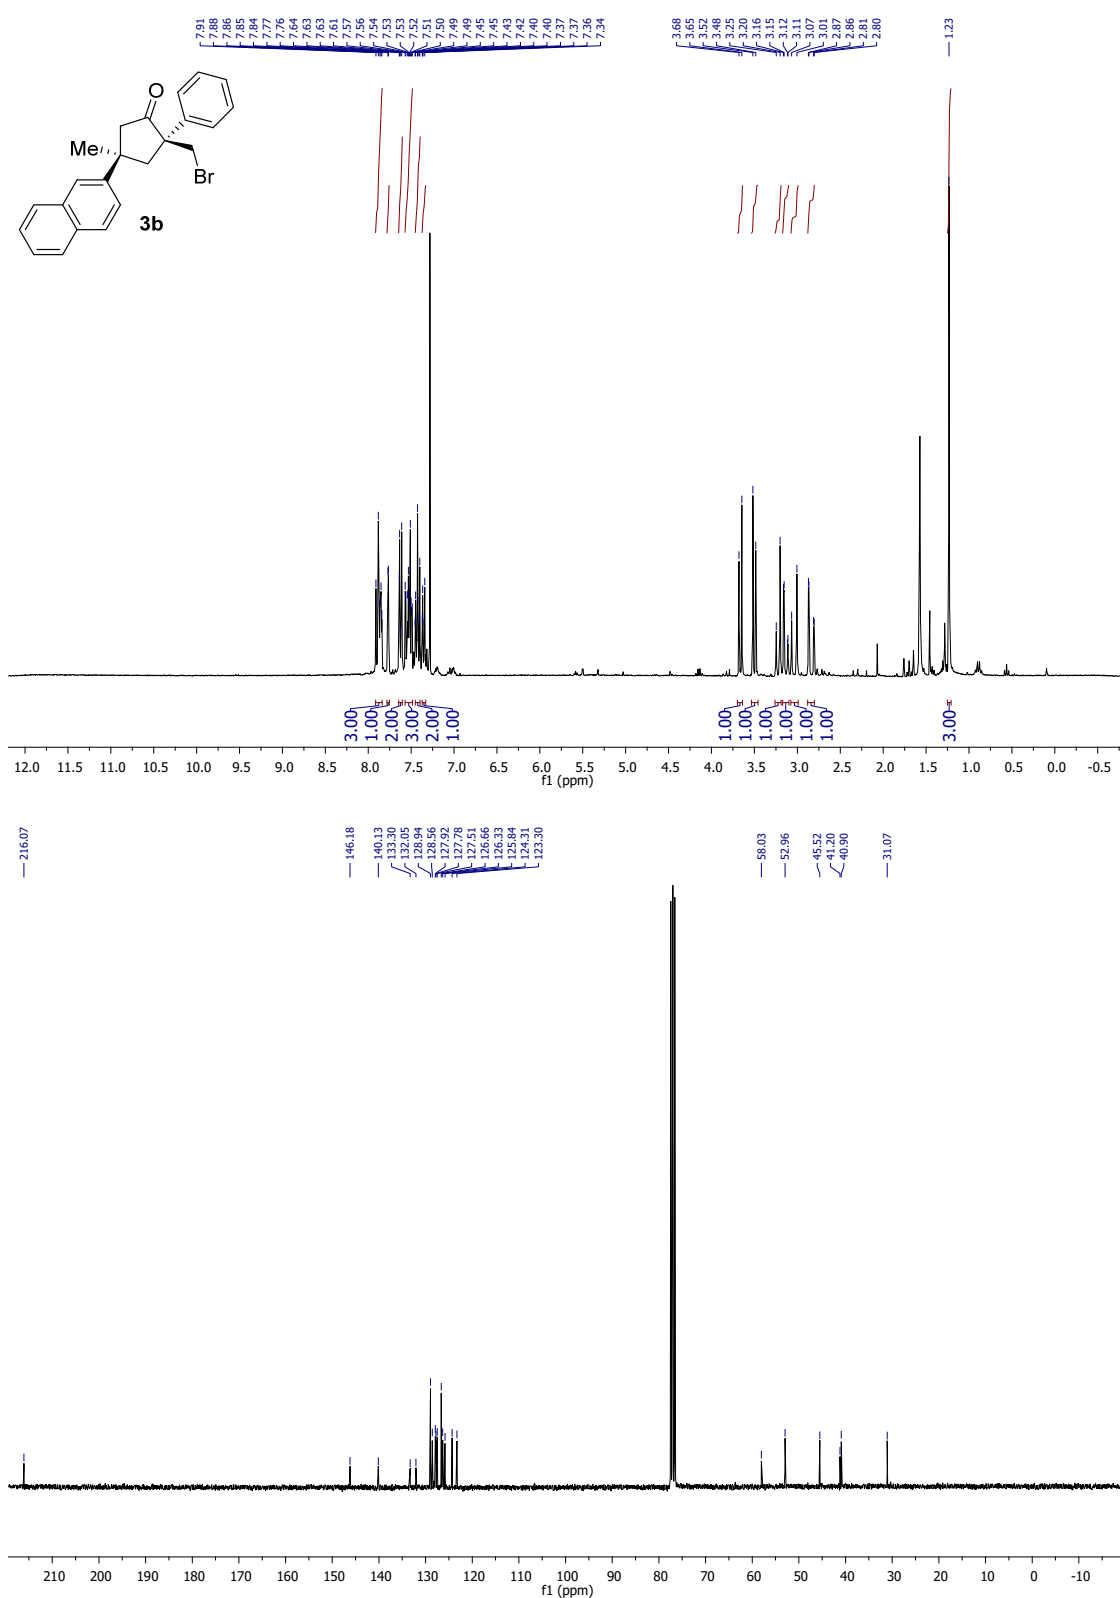

**Figure S29.** <sup>1</sup>H-NMR (300MHz, CDCl<sub>3</sub>) and <sup>13</sup>C{<sup>1</sup>H}-NMR (75.5MHz, CDCl<sub>3</sub>) of compound **3b**

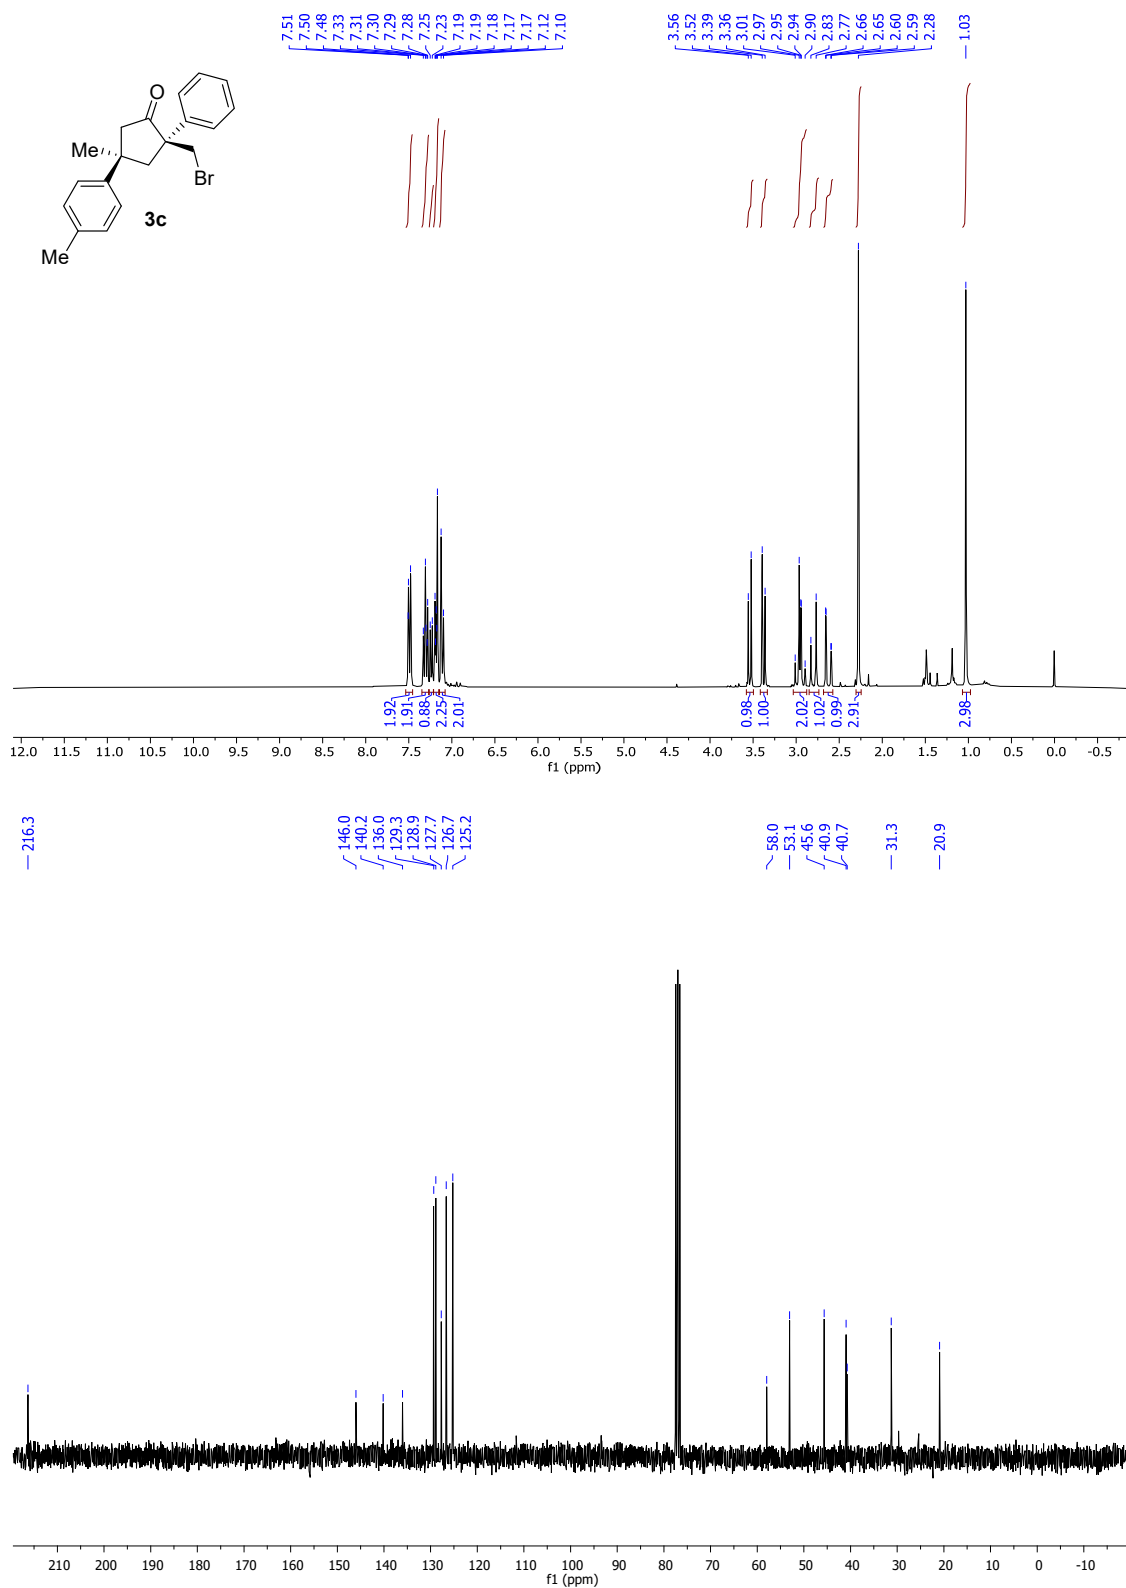

**Figure S30.** <sup>1</sup>H-NMR (300MHz, CDCl<sub>3</sub>) and <sup>13</sup>C{<sup>1</sup>H}-NMR (75.5MHz, CDCl<sub>3</sub>) of compound **3c**

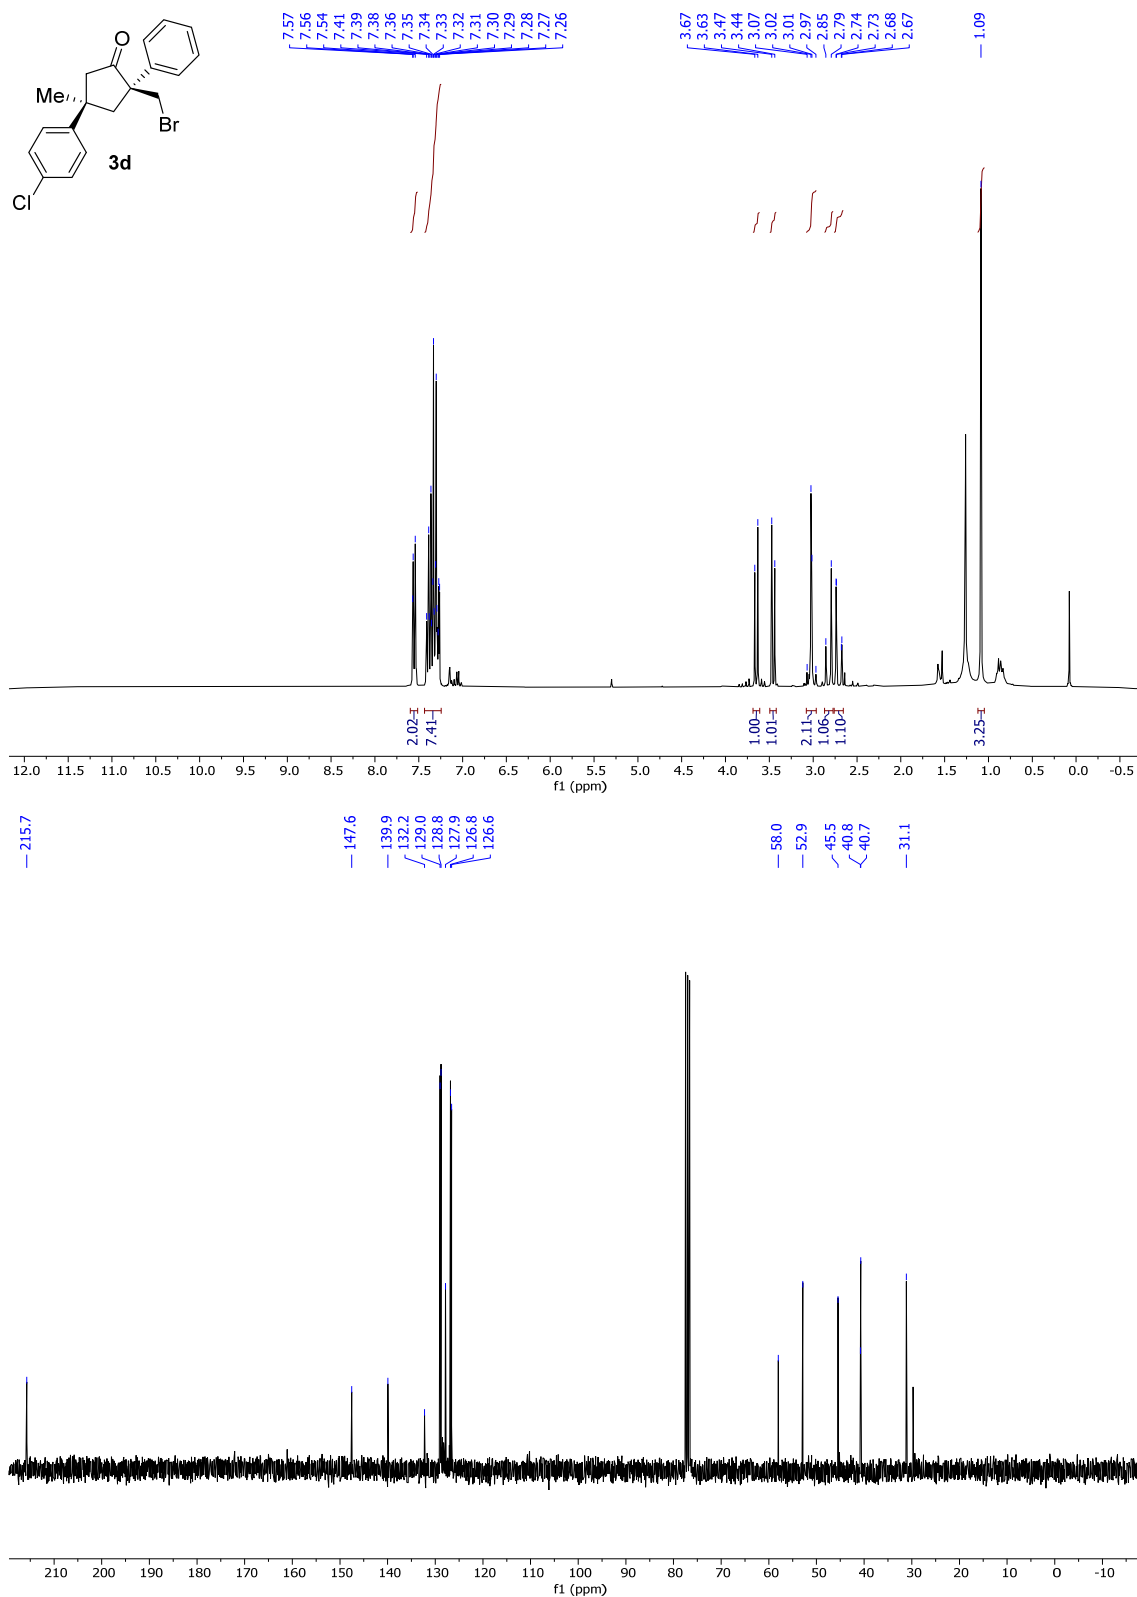

**Figure S31.** <sup>1</sup>H-NMR (300MHz, CDCl<sub>3</sub>) and <sup>13</sup>C{<sup>1</sup>H}-NMR (75.5MHz, CDCl<sub>3</sub>) of compound **3d**



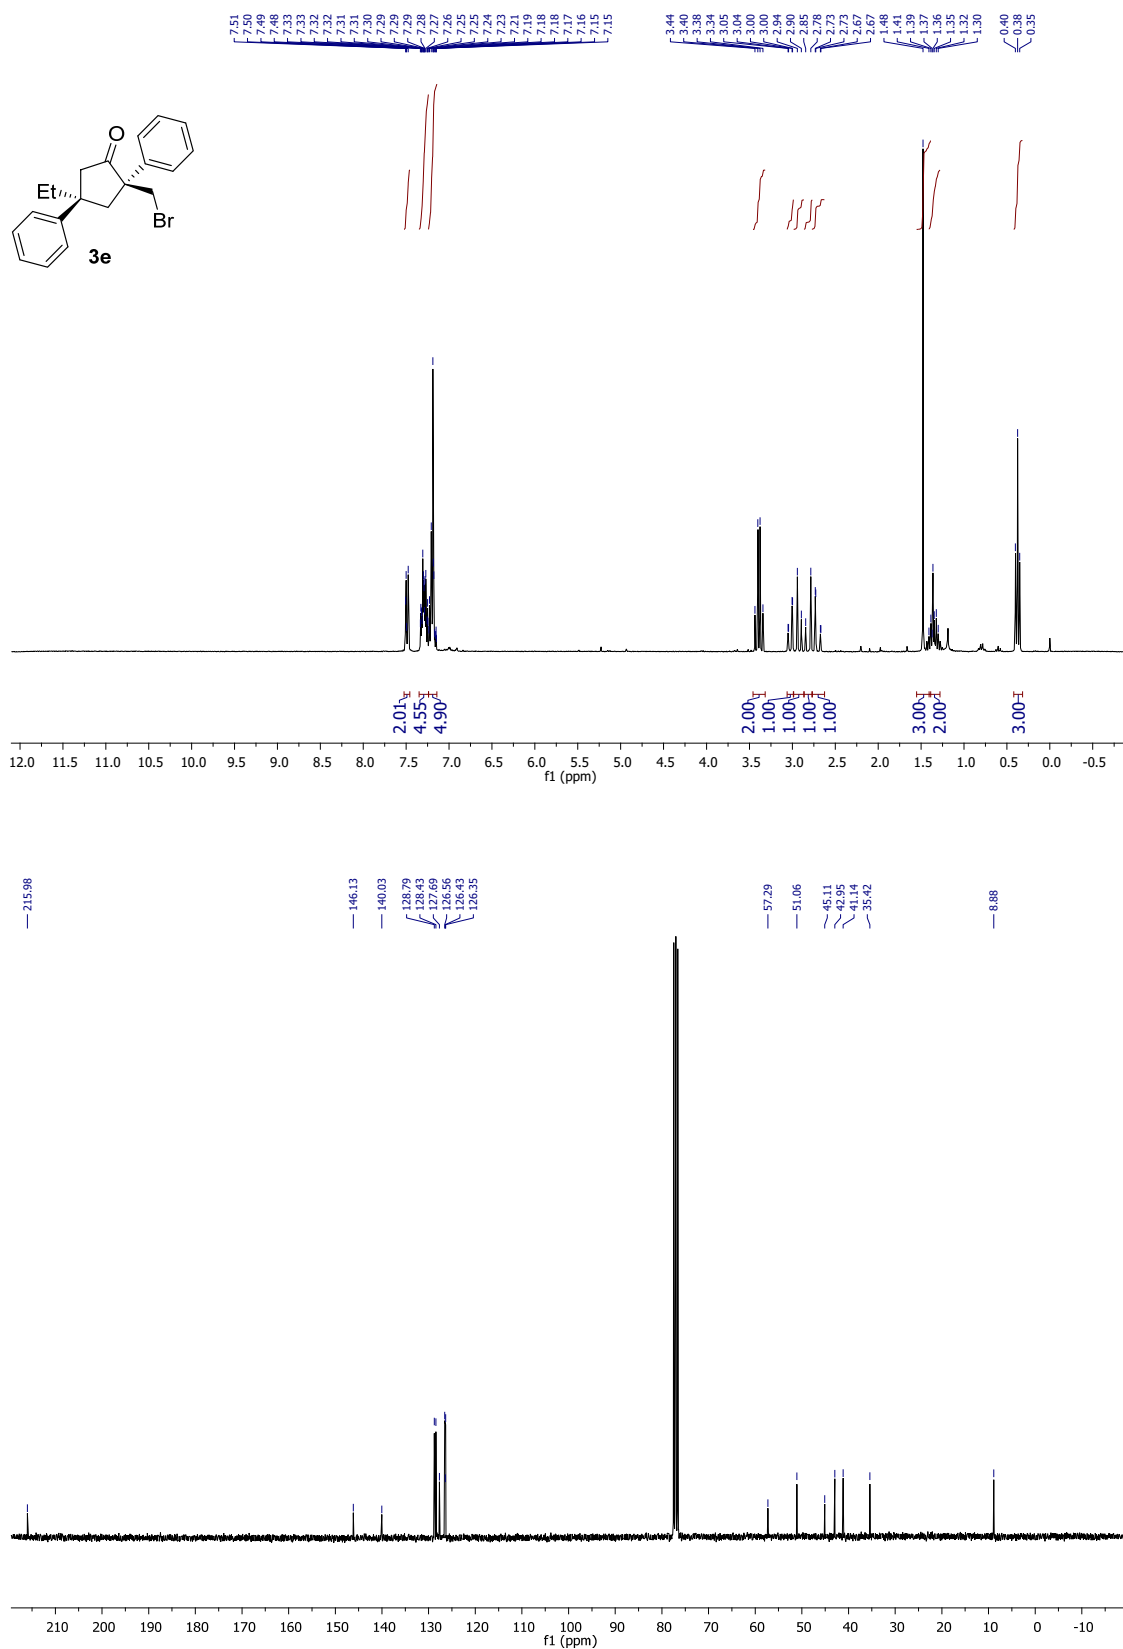

**Figure S32.** <sup>1</sup>H-NMR (300MHz, CDCl<sub>3</sub>) and <sup>13</sup>C{<sup>1</sup>H}-NMR (75.5MHz, CDCl<sub>3</sub>) of compound **3e**

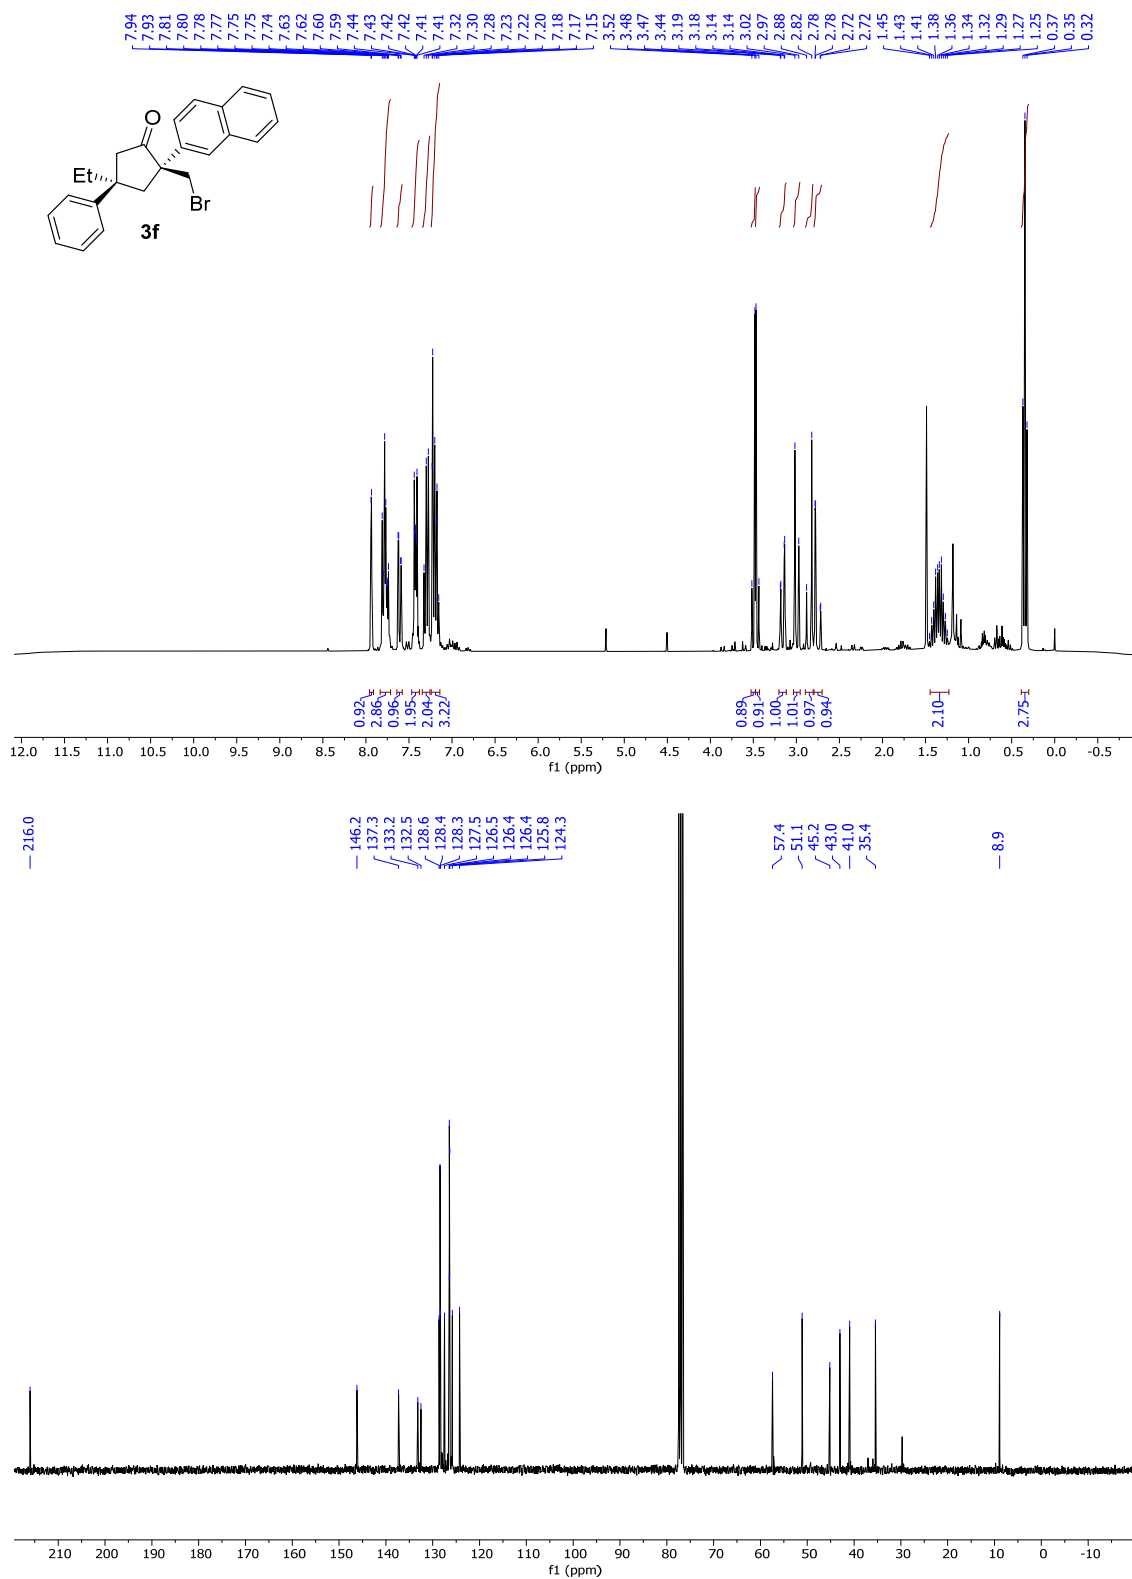

**Figure S33.** <sup>1</sup>H-NMR (300MHz, CDCl<sub>3</sub>) and <sup>13</sup>C{<sup>1</sup>H}-NMR (75.5MHz, CDCl<sub>3</sub>) of compound **3f**

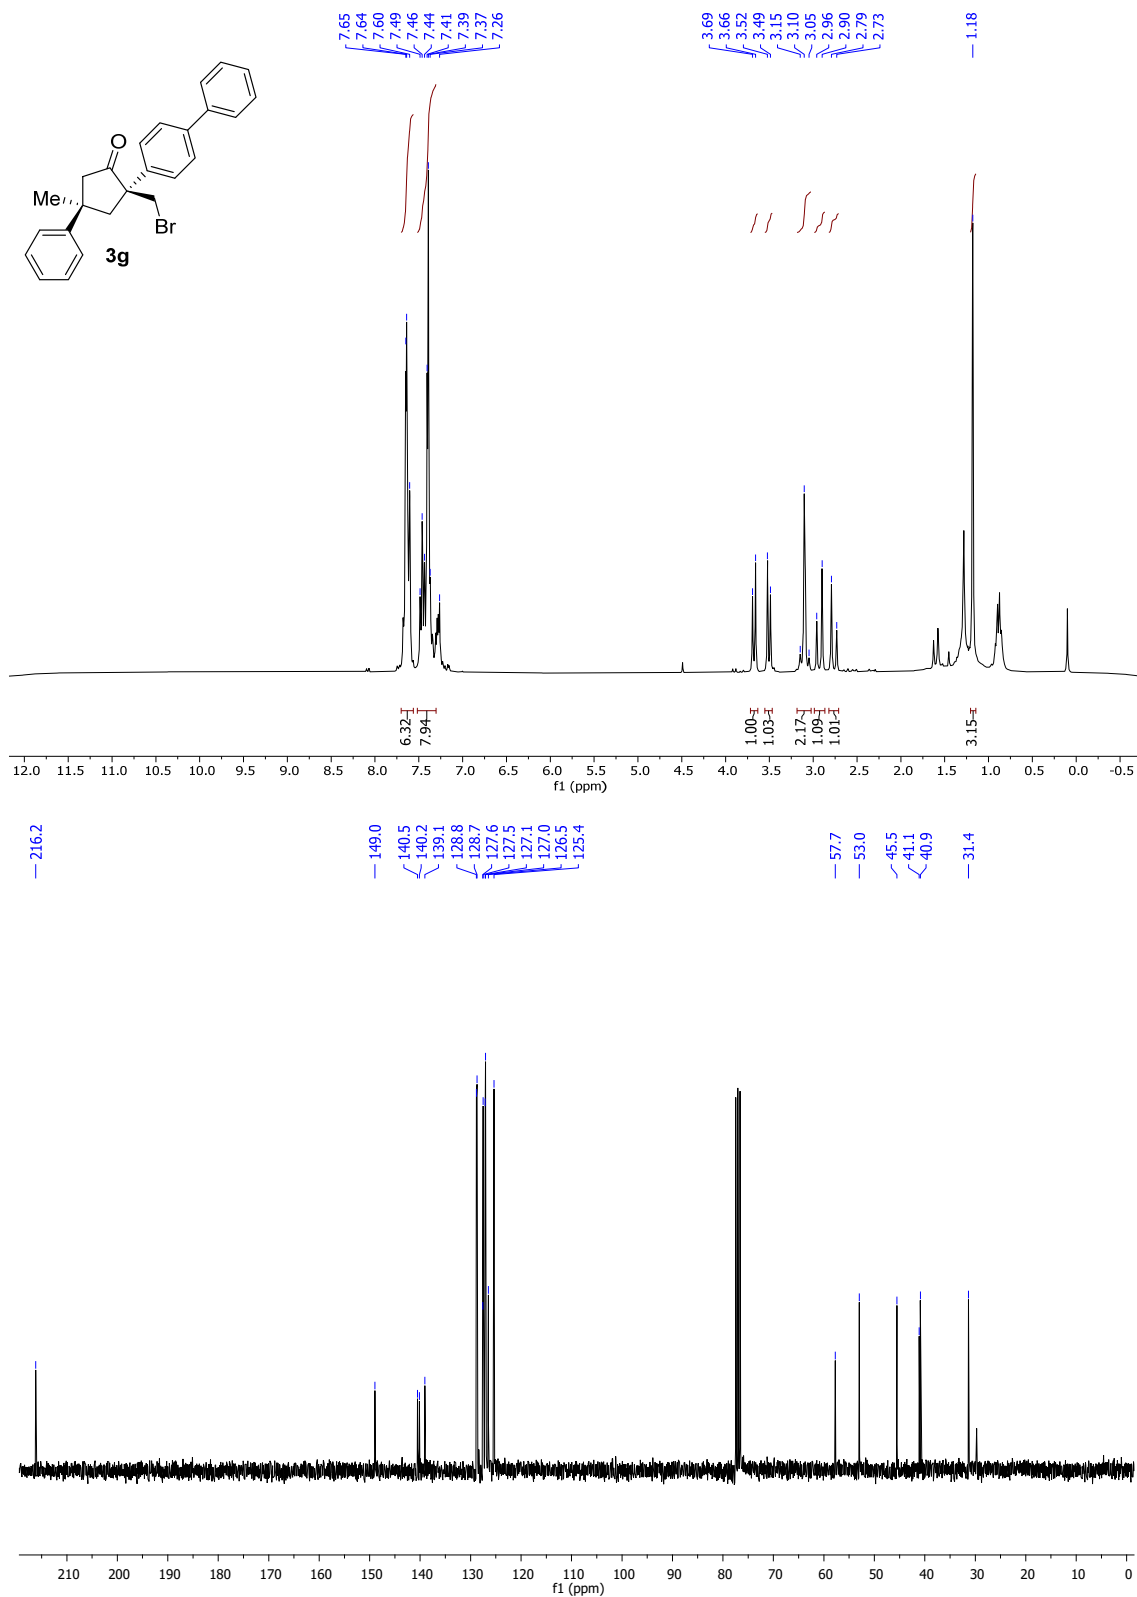

**Figure S34.** <sup>1</sup>H-NMR (300MHz, CDCl<sub>3</sub>) and <sup>13</sup>C{<sup>1</sup>H}-NMR (75.5MHz, CDCl<sub>3</sub>) of compound **3g**

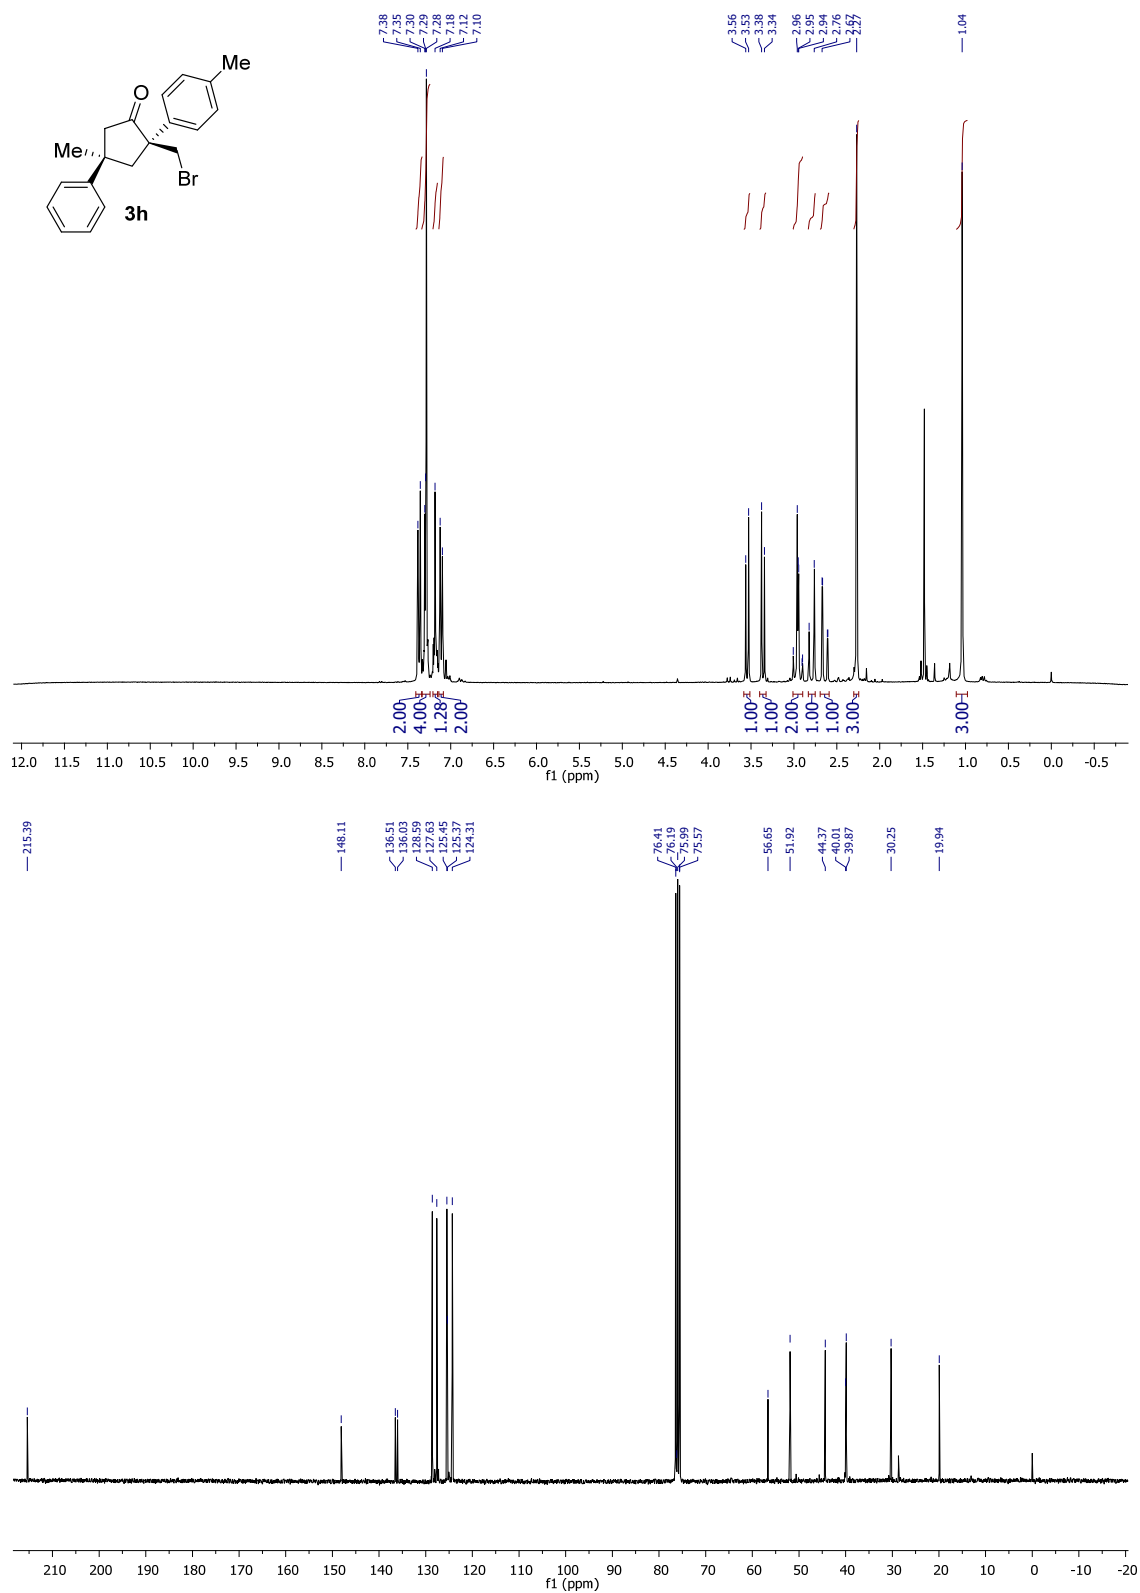

**Figure S35.** <sup>1</sup>H-NMR (300MHz, CDCl<sub>3</sub>) and <sup>13</sup>C{<sup>1</sup>H}-NMR (75.5MHz, CDCl<sub>3</sub>) of compound **3h**

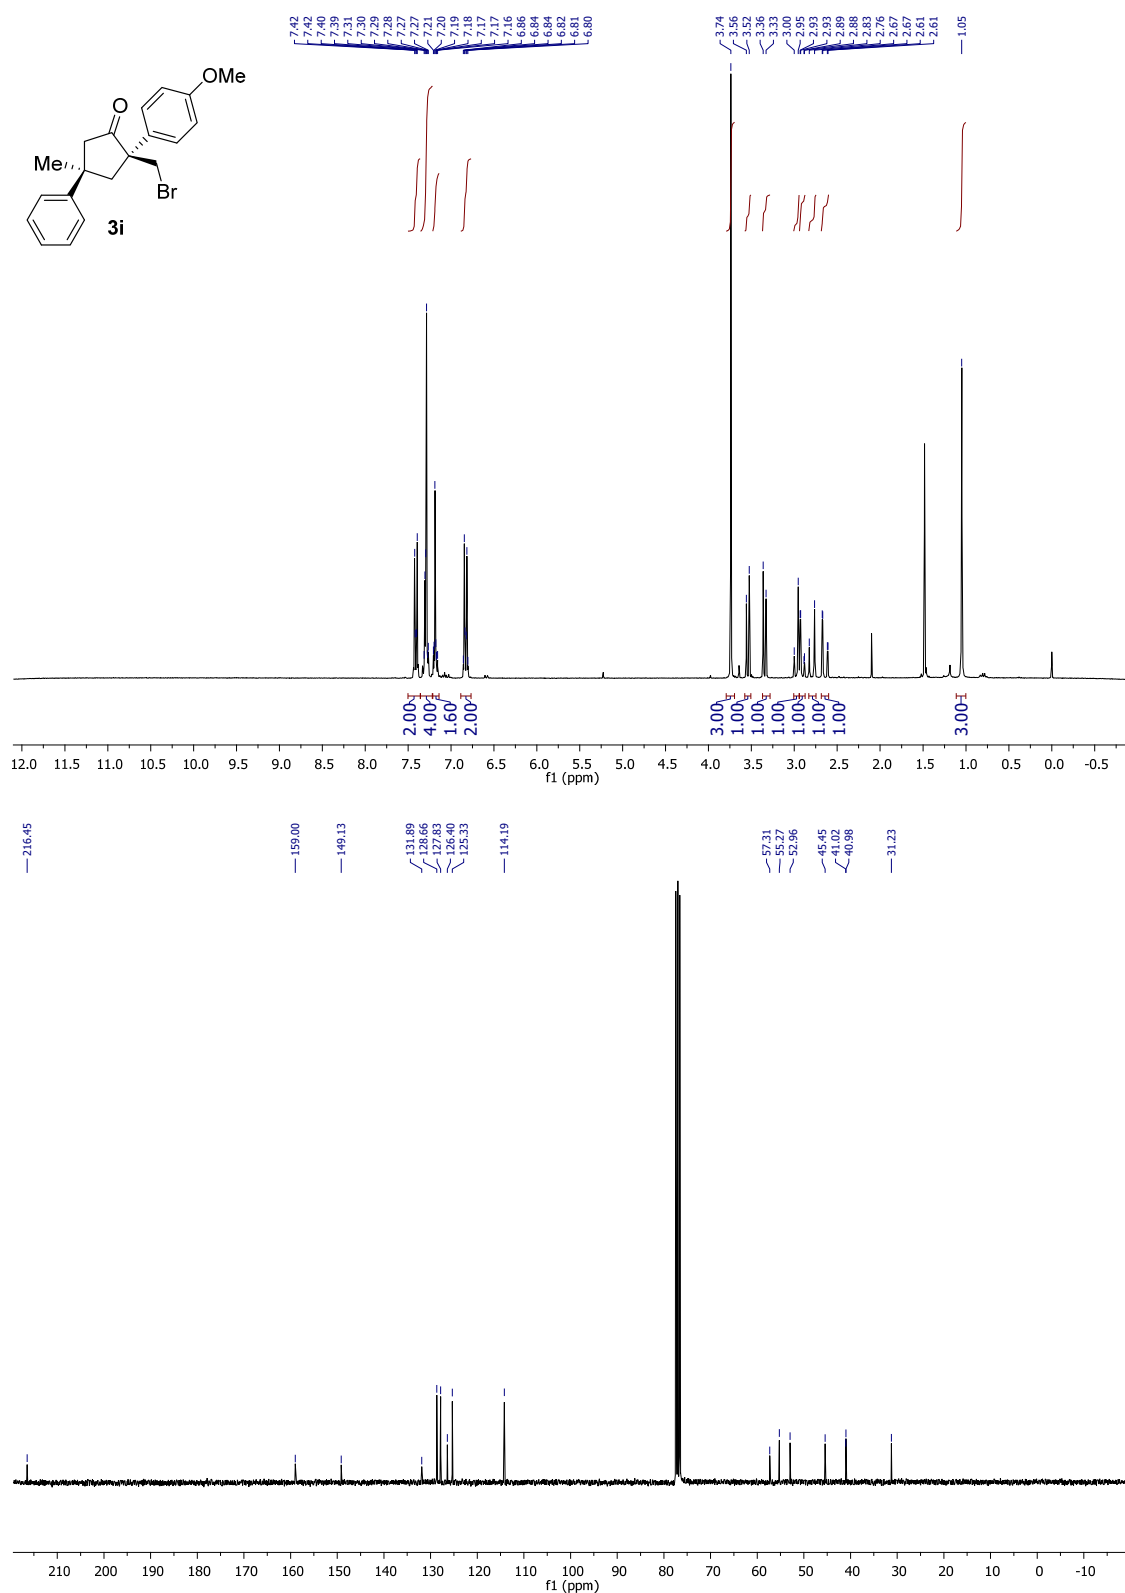

**Figure S36.** <sup>1</sup>H-NMR (300MHz, CDCl<sub>3</sub>) and <sup>13</sup>C{<sup>1</sup>H}-NMR (75.5MHz, CDCl<sub>3</sub>) of compound **3i**

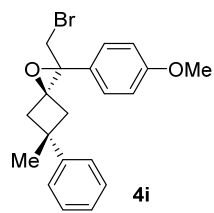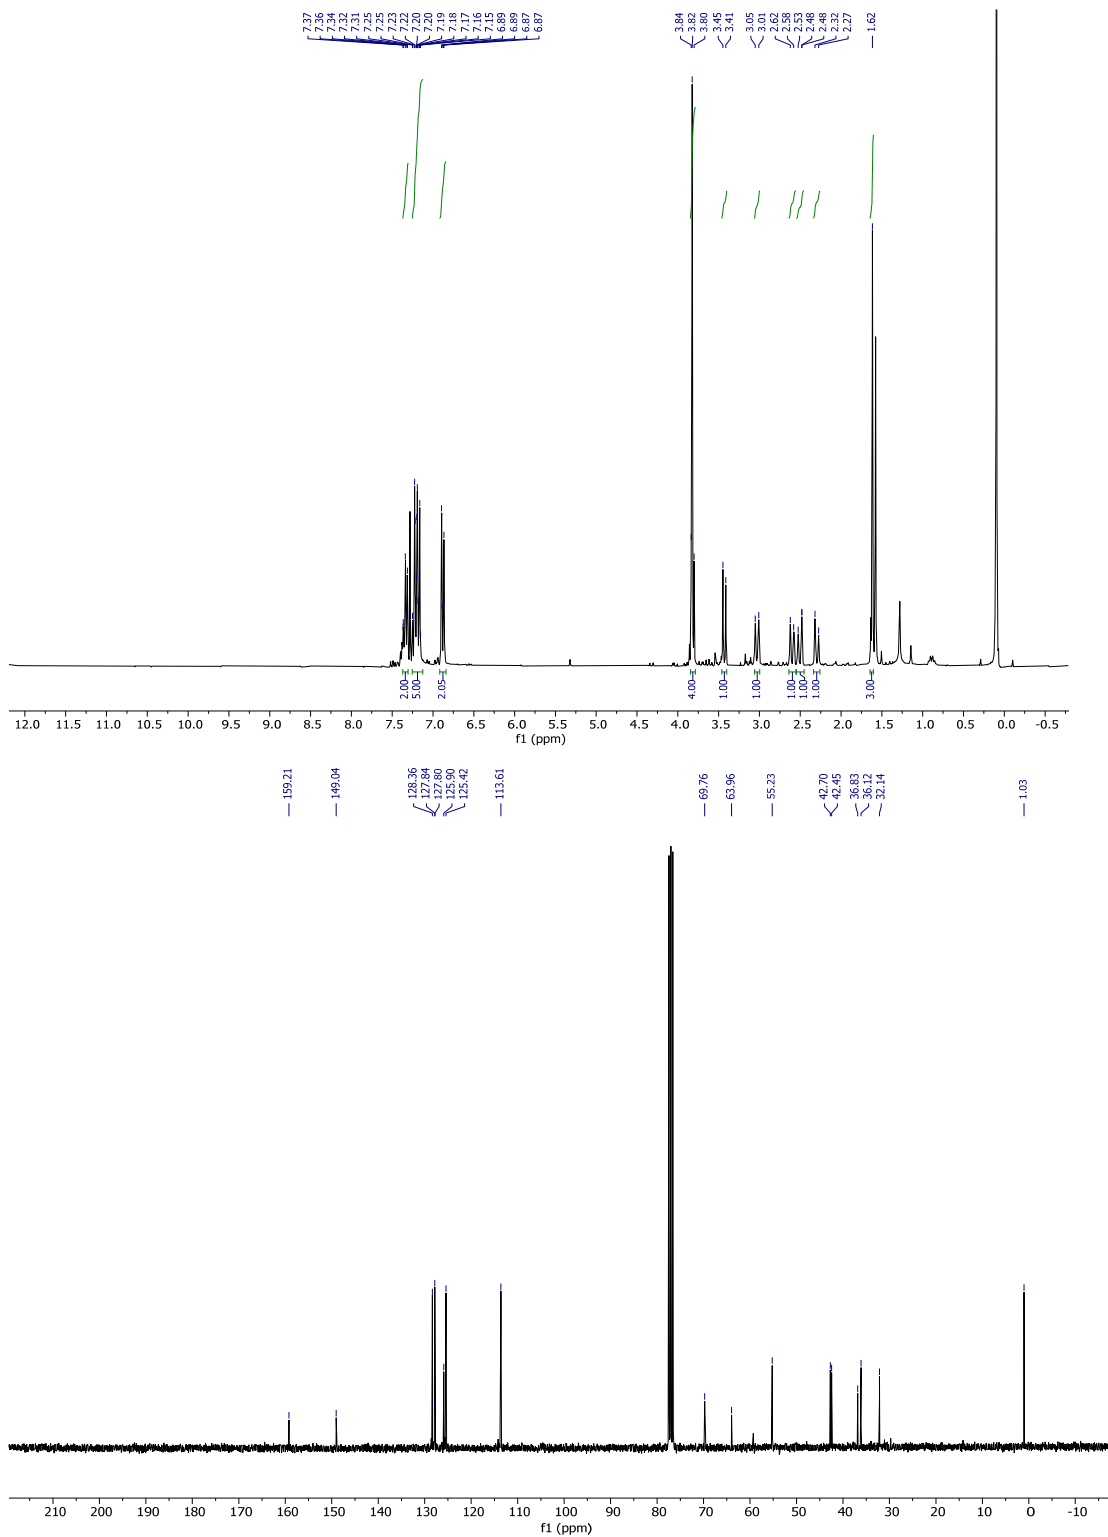

Figure S37. <sup>1</sup>H-NMR (300MHz, CDCl<sub>3</sub>) and <sup>13</sup>C{<sup>1</sup>H}-NMR (75.5MHz, CDCl<sub>3</sub>) of compound **4i**

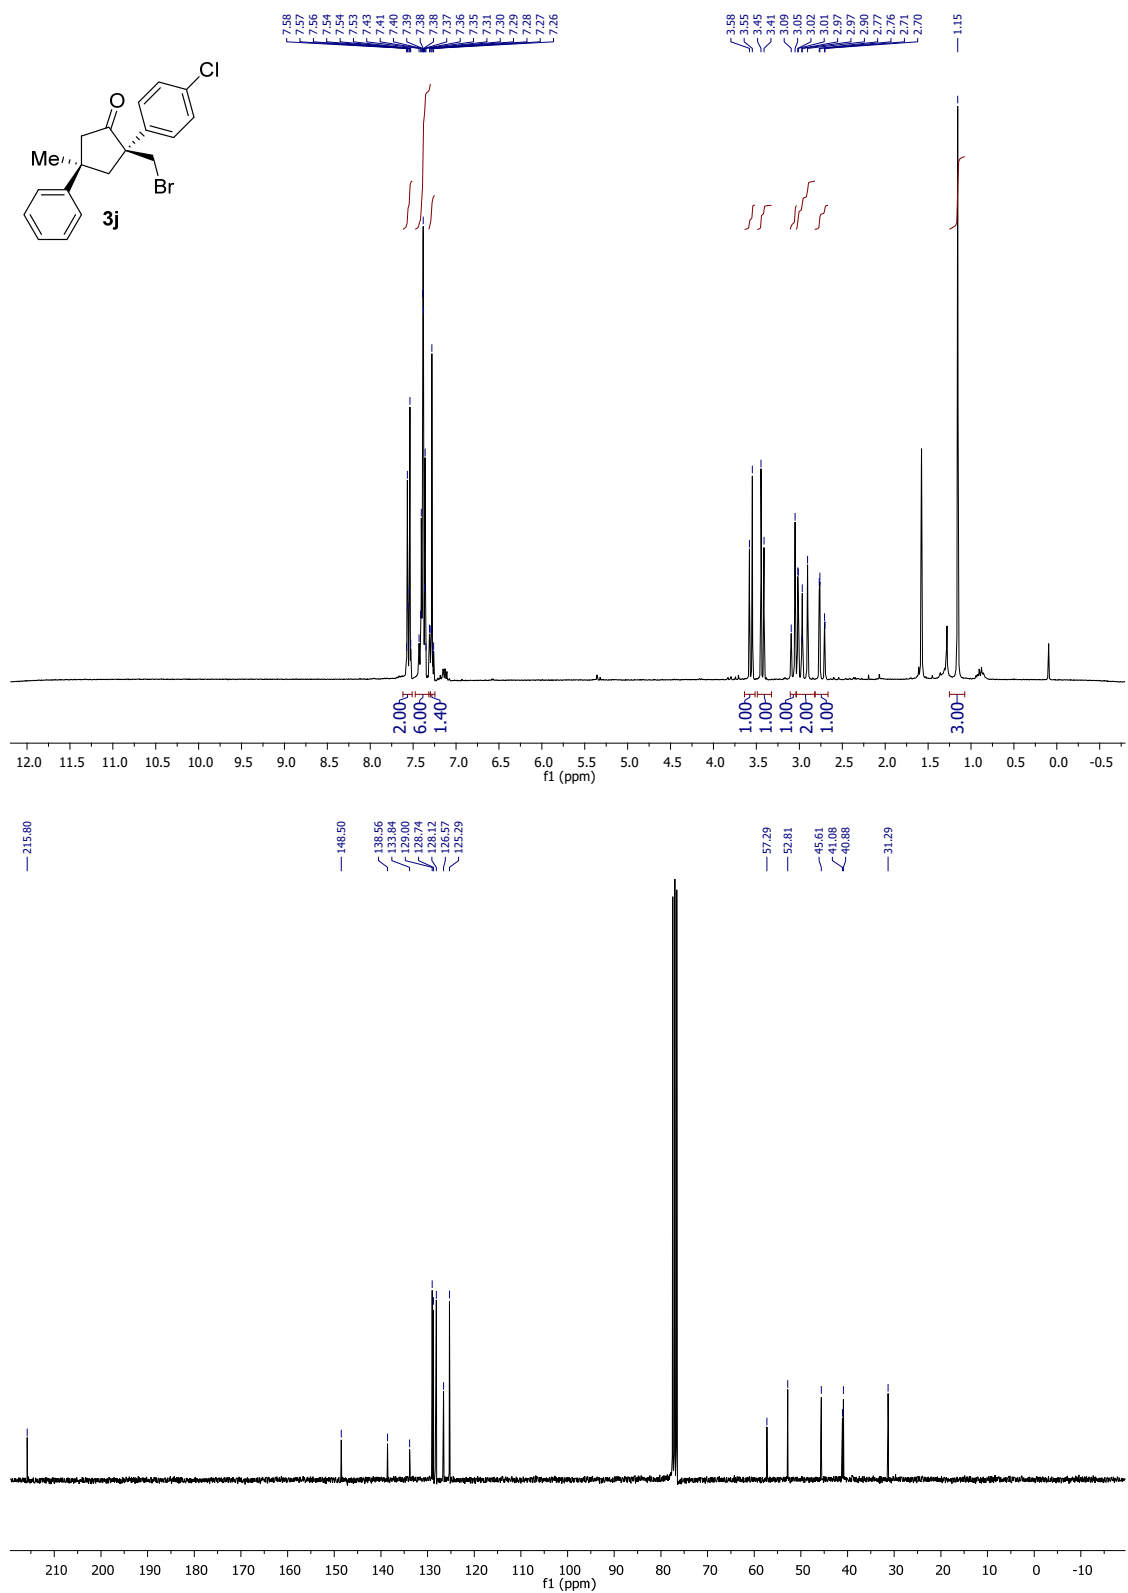

**Figure S38.** <sup>1</sup>H-NMR (300MHz, CDCl<sub>3</sub>) and <sup>13</sup>C{<sup>1</sup>H}-NMR (75.5MHz, CDCl<sub>3</sub>) of compound **3j**

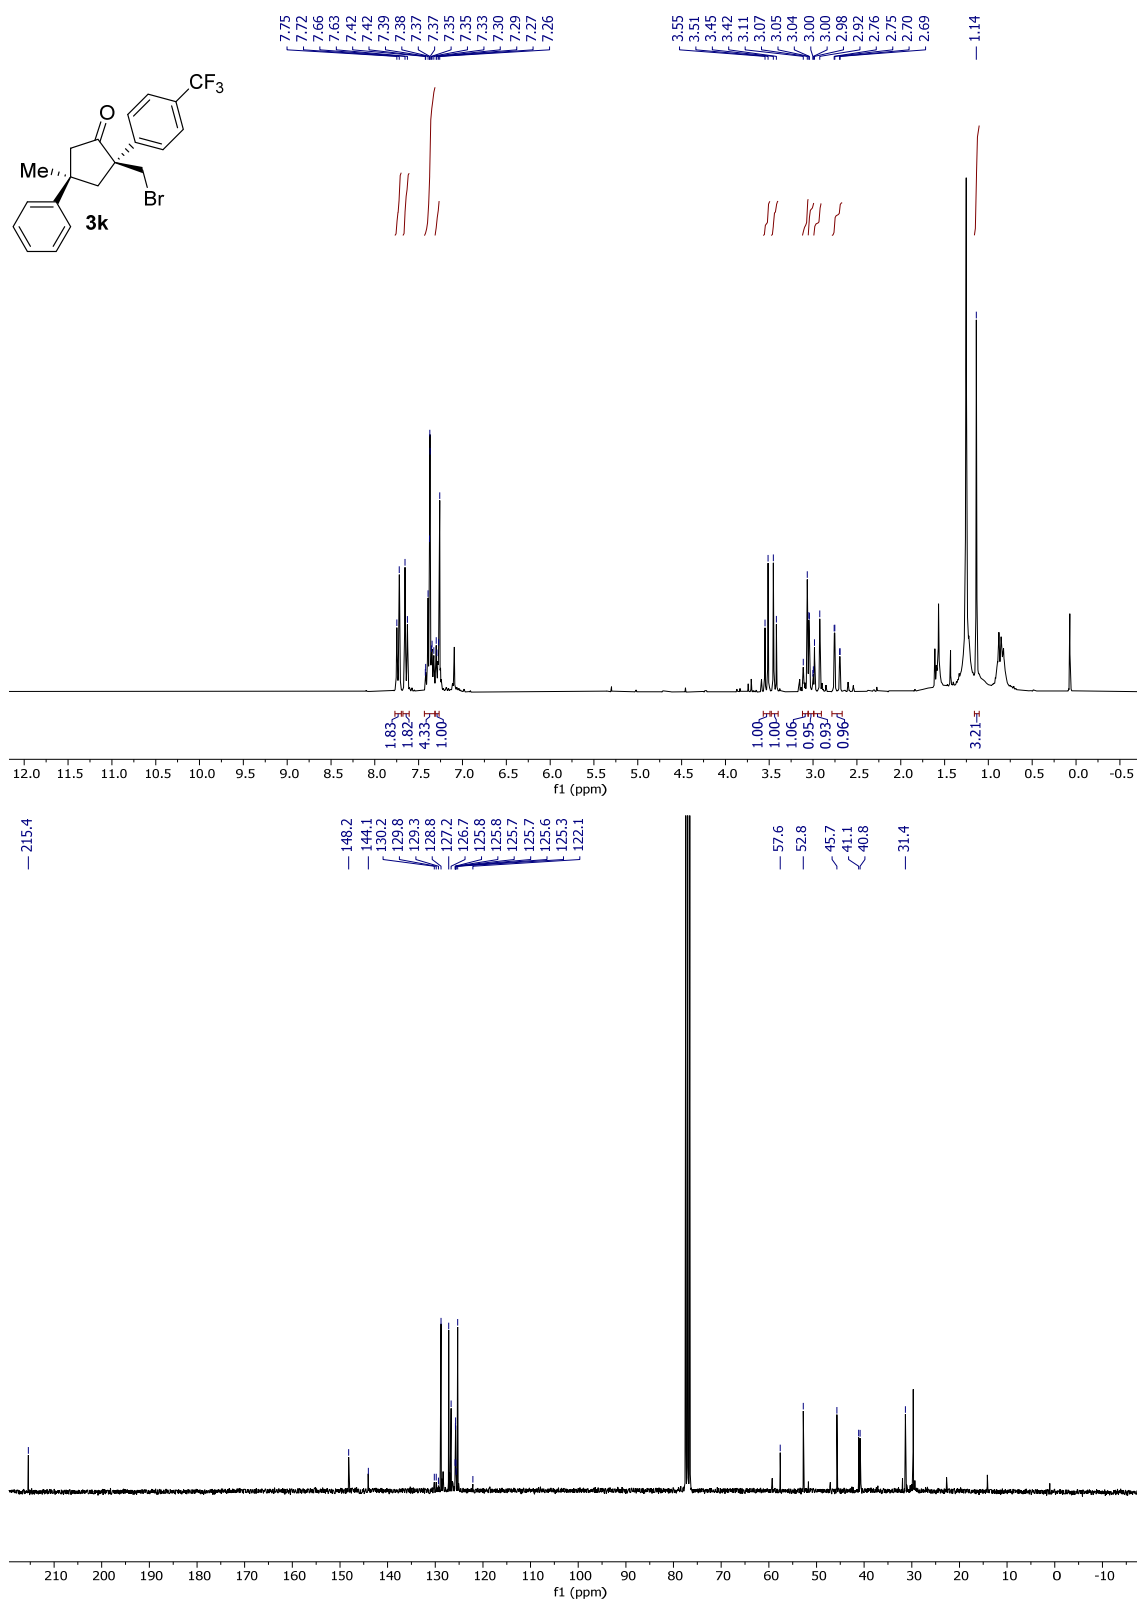

**Figure S39.** <sup>1</sup>H-NMR (300MHz, CDCl<sub>3</sub>) and <sup>13</sup>C{<sup>1</sup>H}-NMR (75.5MHz, CDCl<sub>3</sub>) of compound **3k**



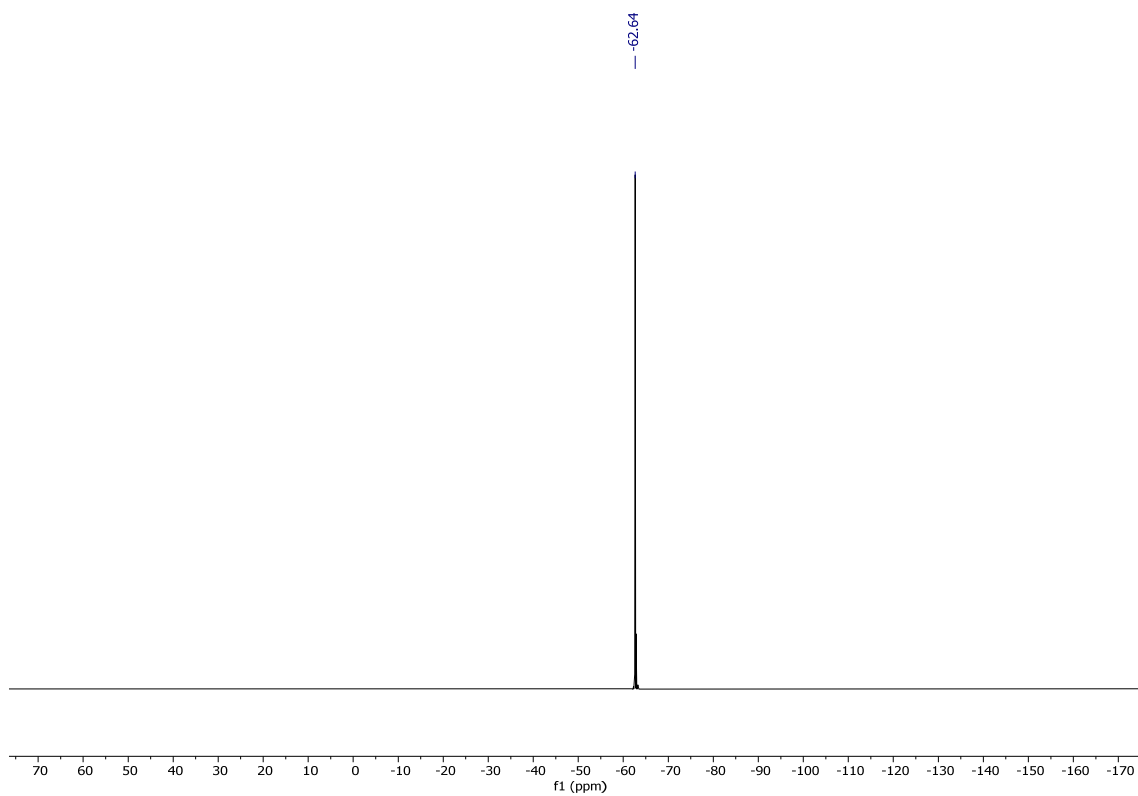

**Figure S40.**  $^{31}\text{P}$ -NMR (122MHz,  $\text{CDCl}_3$ ) of compound **3k**

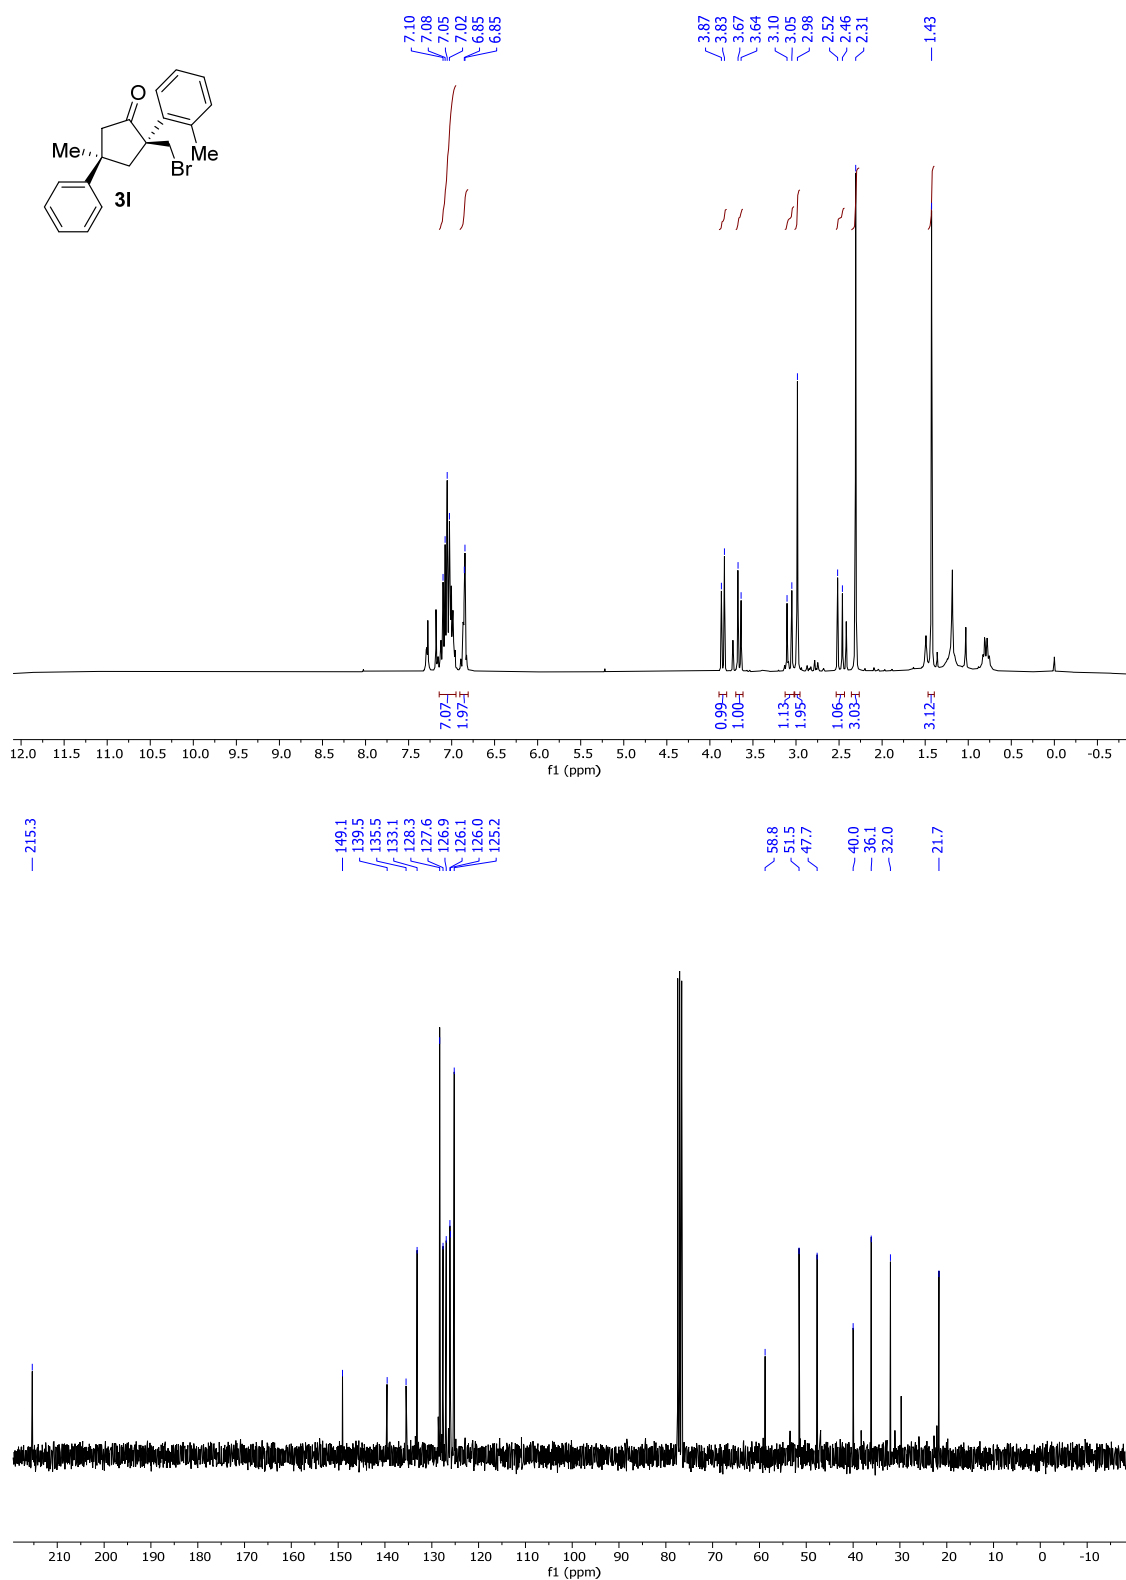

**Figure S41.** <sup>1</sup>H-NMR (300MHz, CDCl<sub>3</sub>) and <sup>13</sup>C{<sup>1</sup>H}-NMR (75.5MHz, CDCl<sub>3</sub>) of compound **3I**

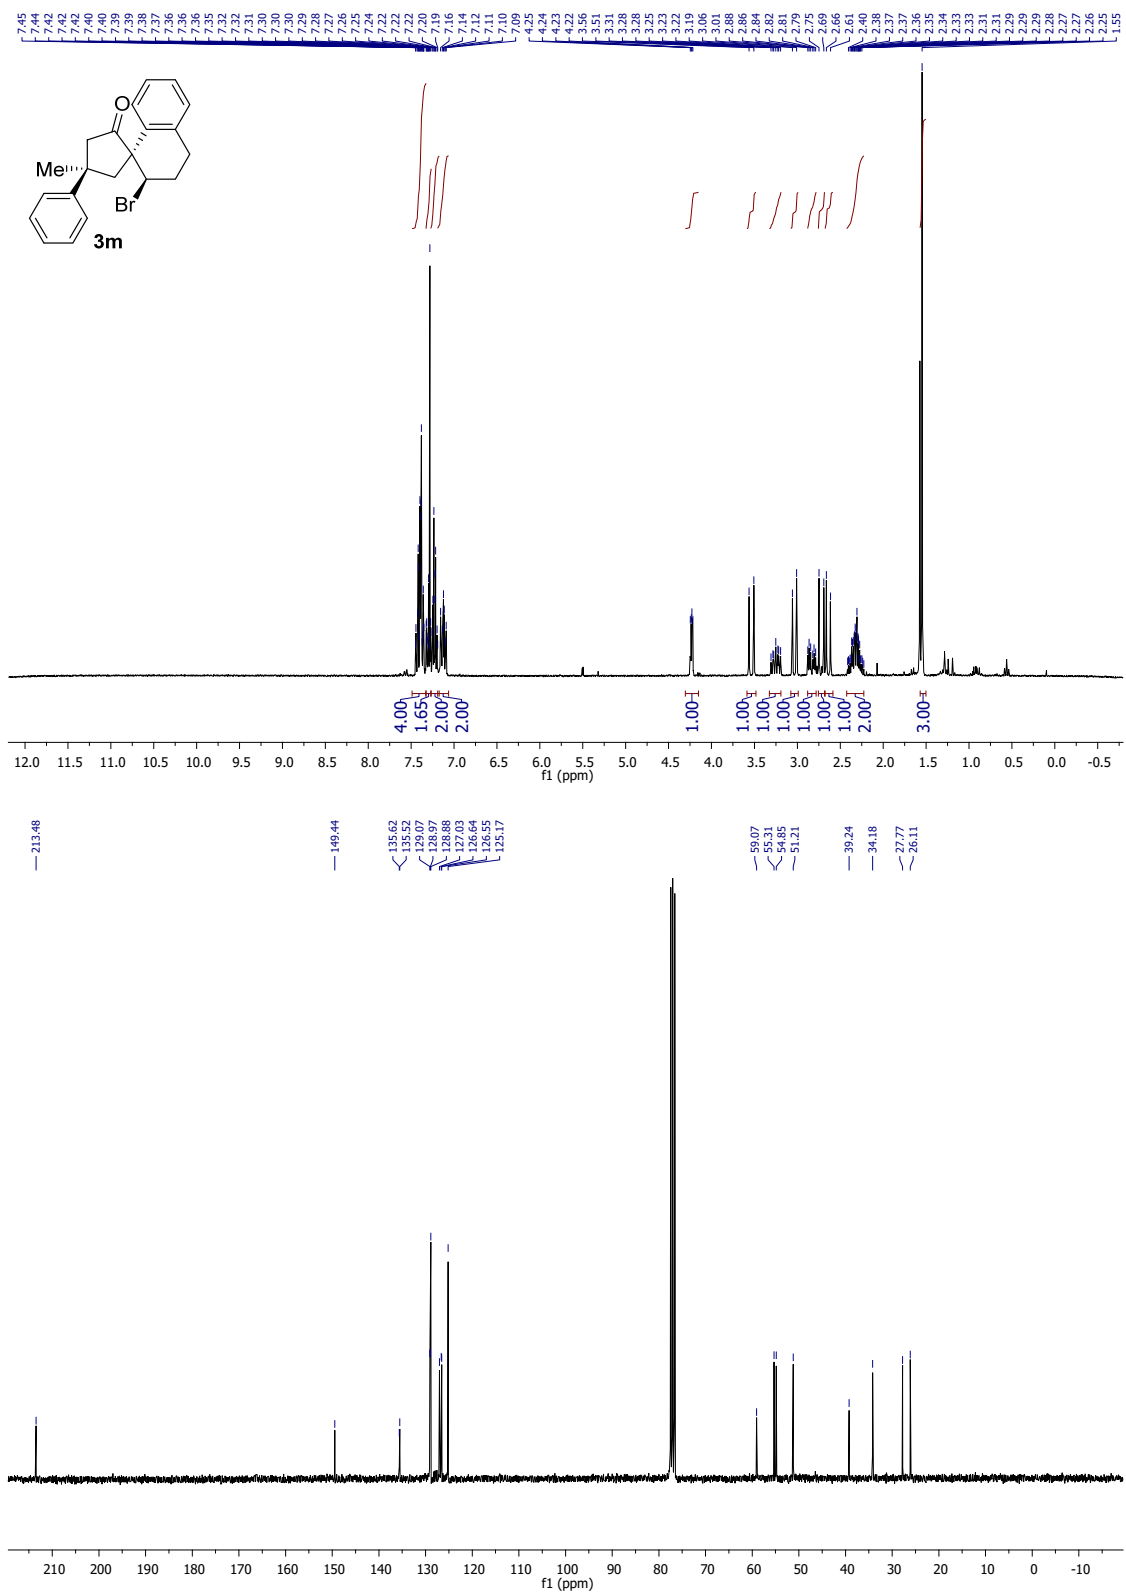

**Figure S42.** <sup>1</sup>H-NMR (300MHz, CDCl<sub>3</sub>) and <sup>13</sup>C{<sup>1</sup>H}-NMR (75.5MHz, CDCl<sub>3</sub>) of compound **3m**

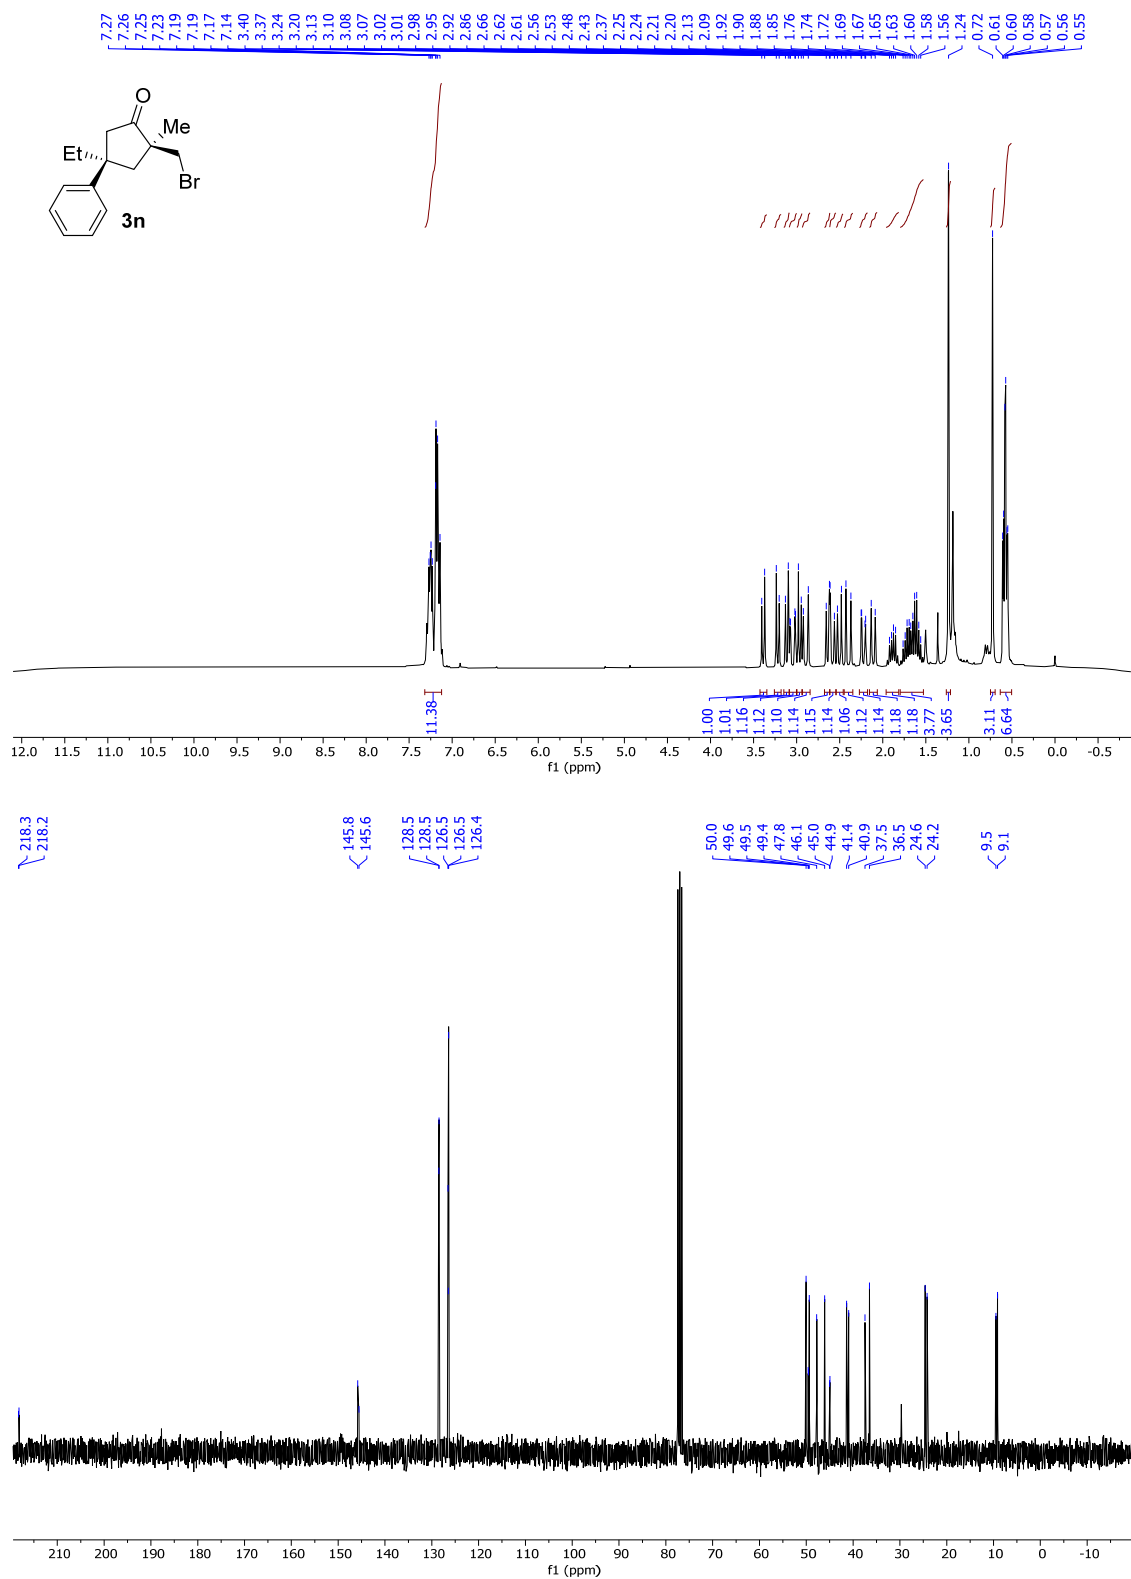

**Figure S43.** <sup>1</sup>H-NMR (300MHz, CDCl<sub>3</sub>) and <sup>13</sup>C{<sup>1</sup>H}-NMR (75.5MHz, CDCl<sub>3</sub>) of compound **3n**

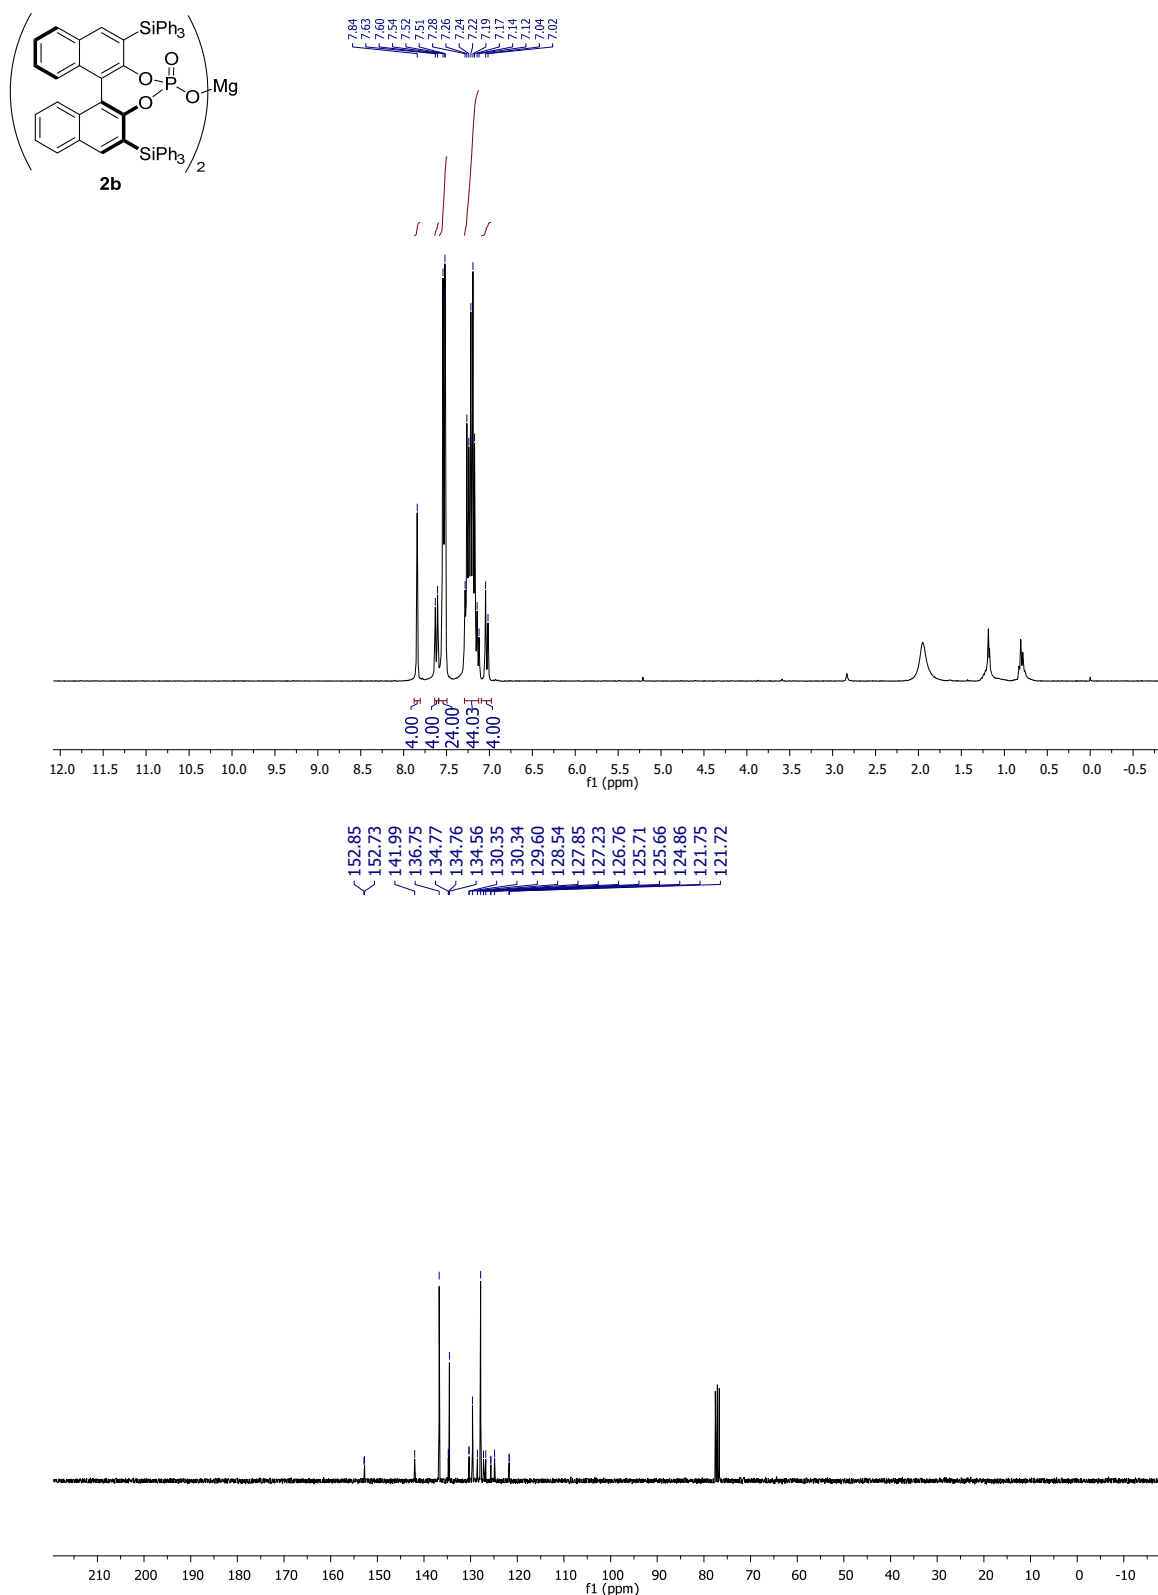

**Figure S44.** <sup>1</sup>H-NMR (300MHz, CDCl<sub>3</sub>) and <sup>13</sup>C{<sup>1</sup>H}-NMR (75.5MHz, CDCl<sub>3</sub>) of compound **2b**

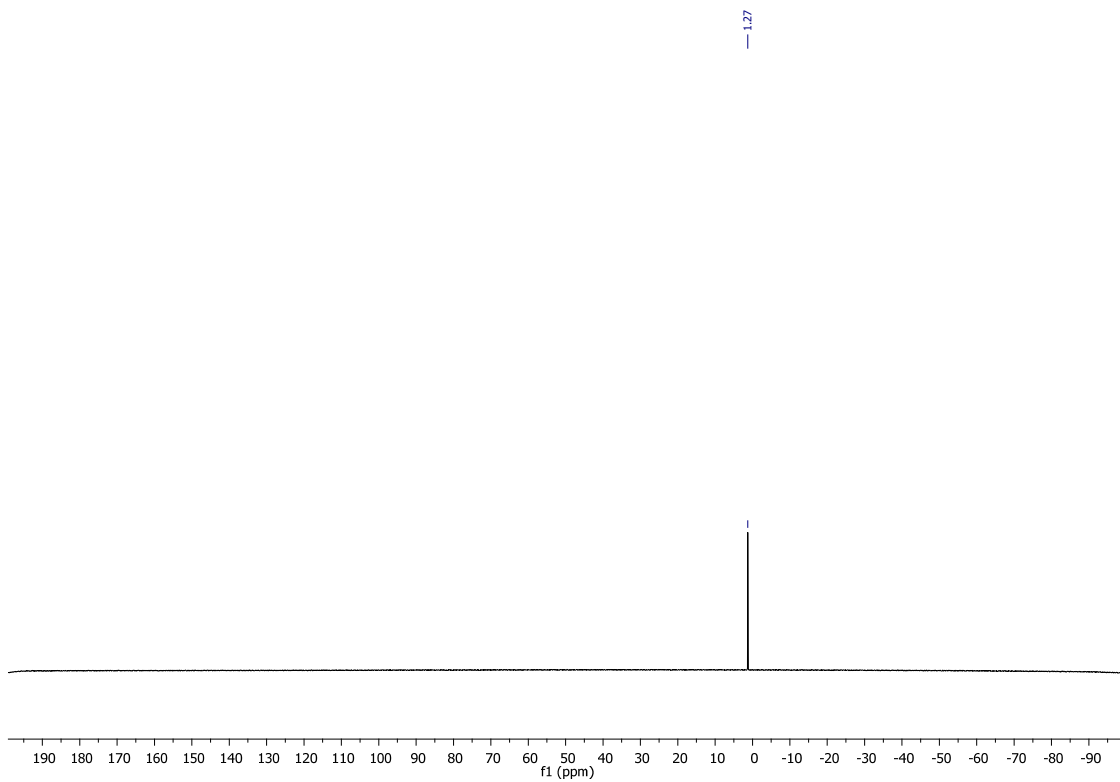

**Figure S45.**  $^{31}\text{P}$ -NMR (122MHz,  $\text{CDCl}_3$ ) of compound **2b**

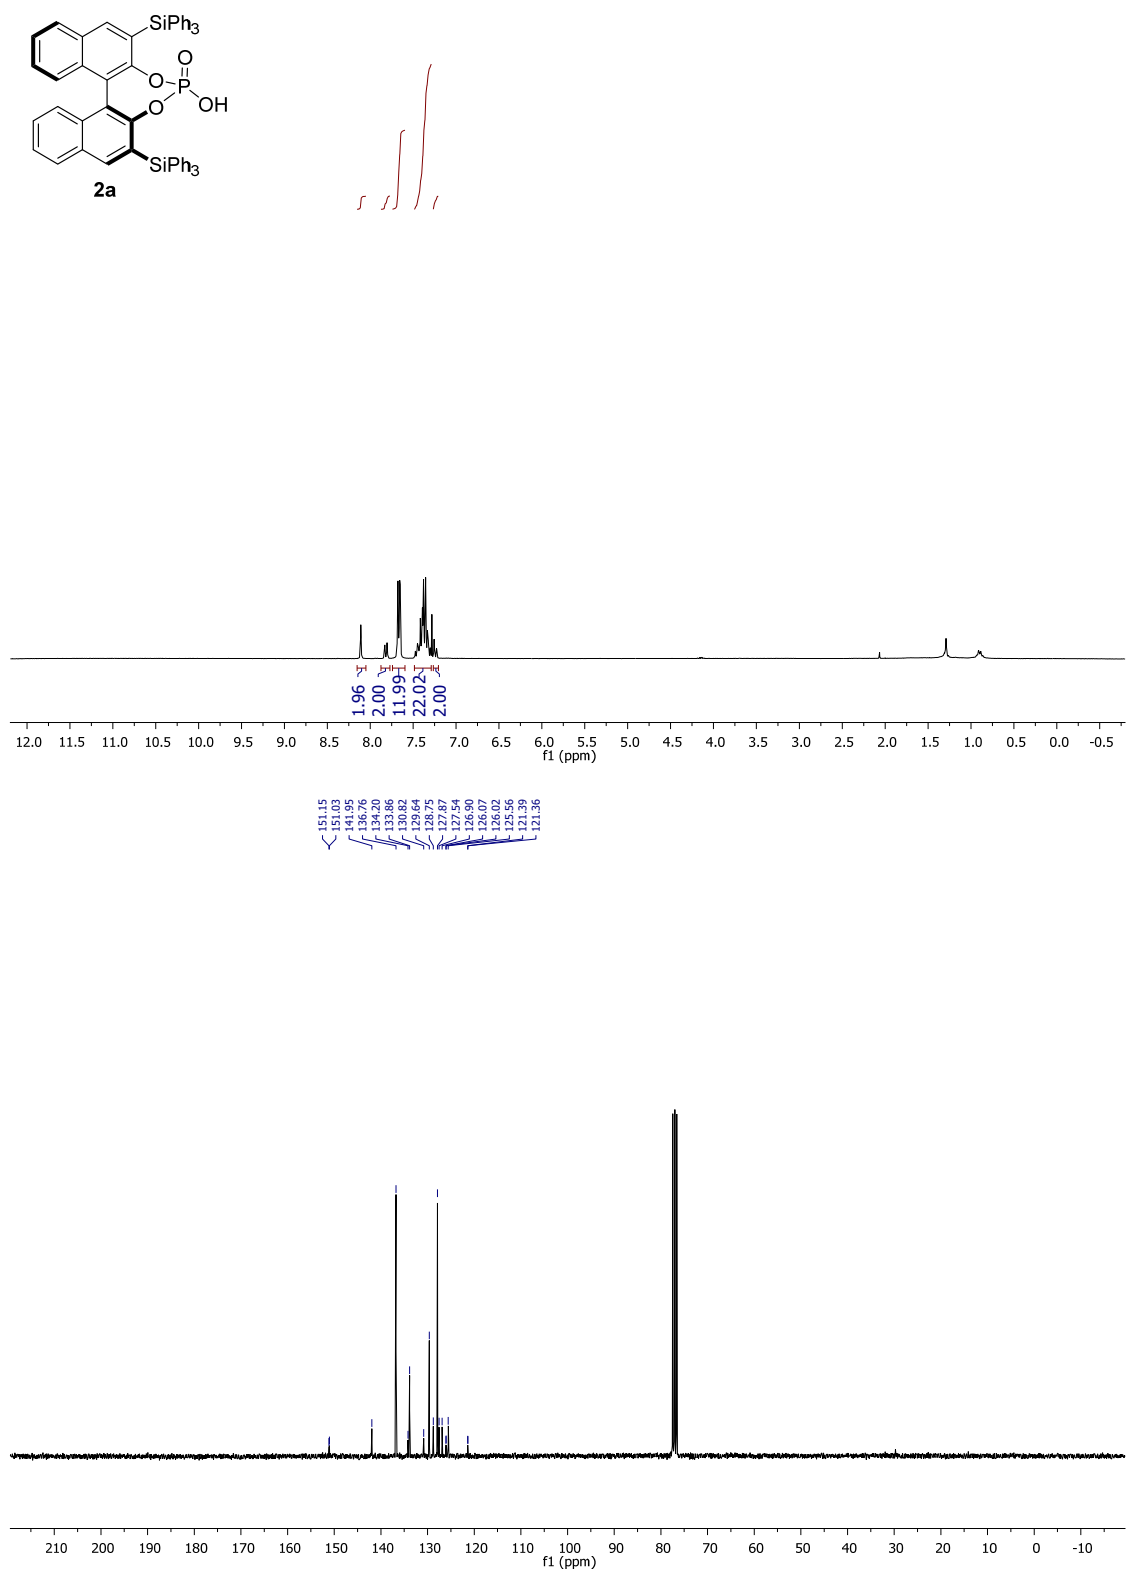

**Figure S46.** <sup>1</sup>H-NMR (300MHz, CDCl<sub>3</sub>) and <sup>13</sup>C{<sup>1</sup>H}-NMR (75.5MHz, CDCl<sub>3</sub>) of compound **2a**

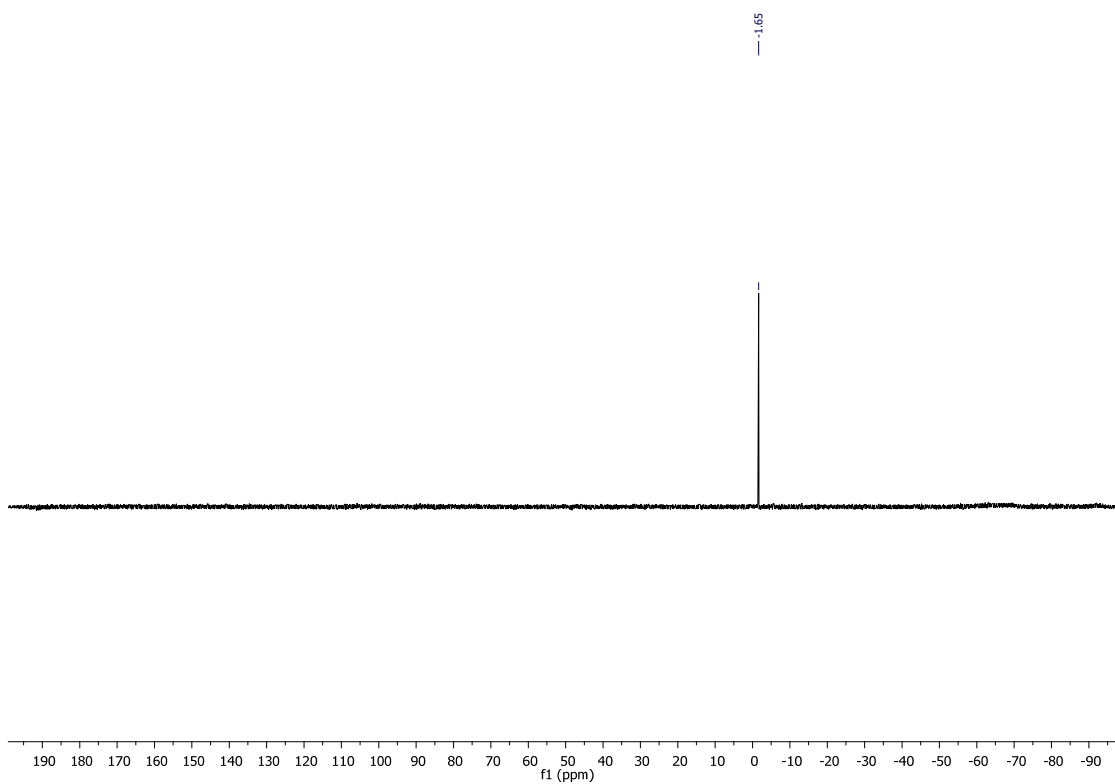

**Figure S47.**  $^{31}\text{P}$ -NMR (122MHz,  $\text{CDCl}_3$ ) of compound **2a**



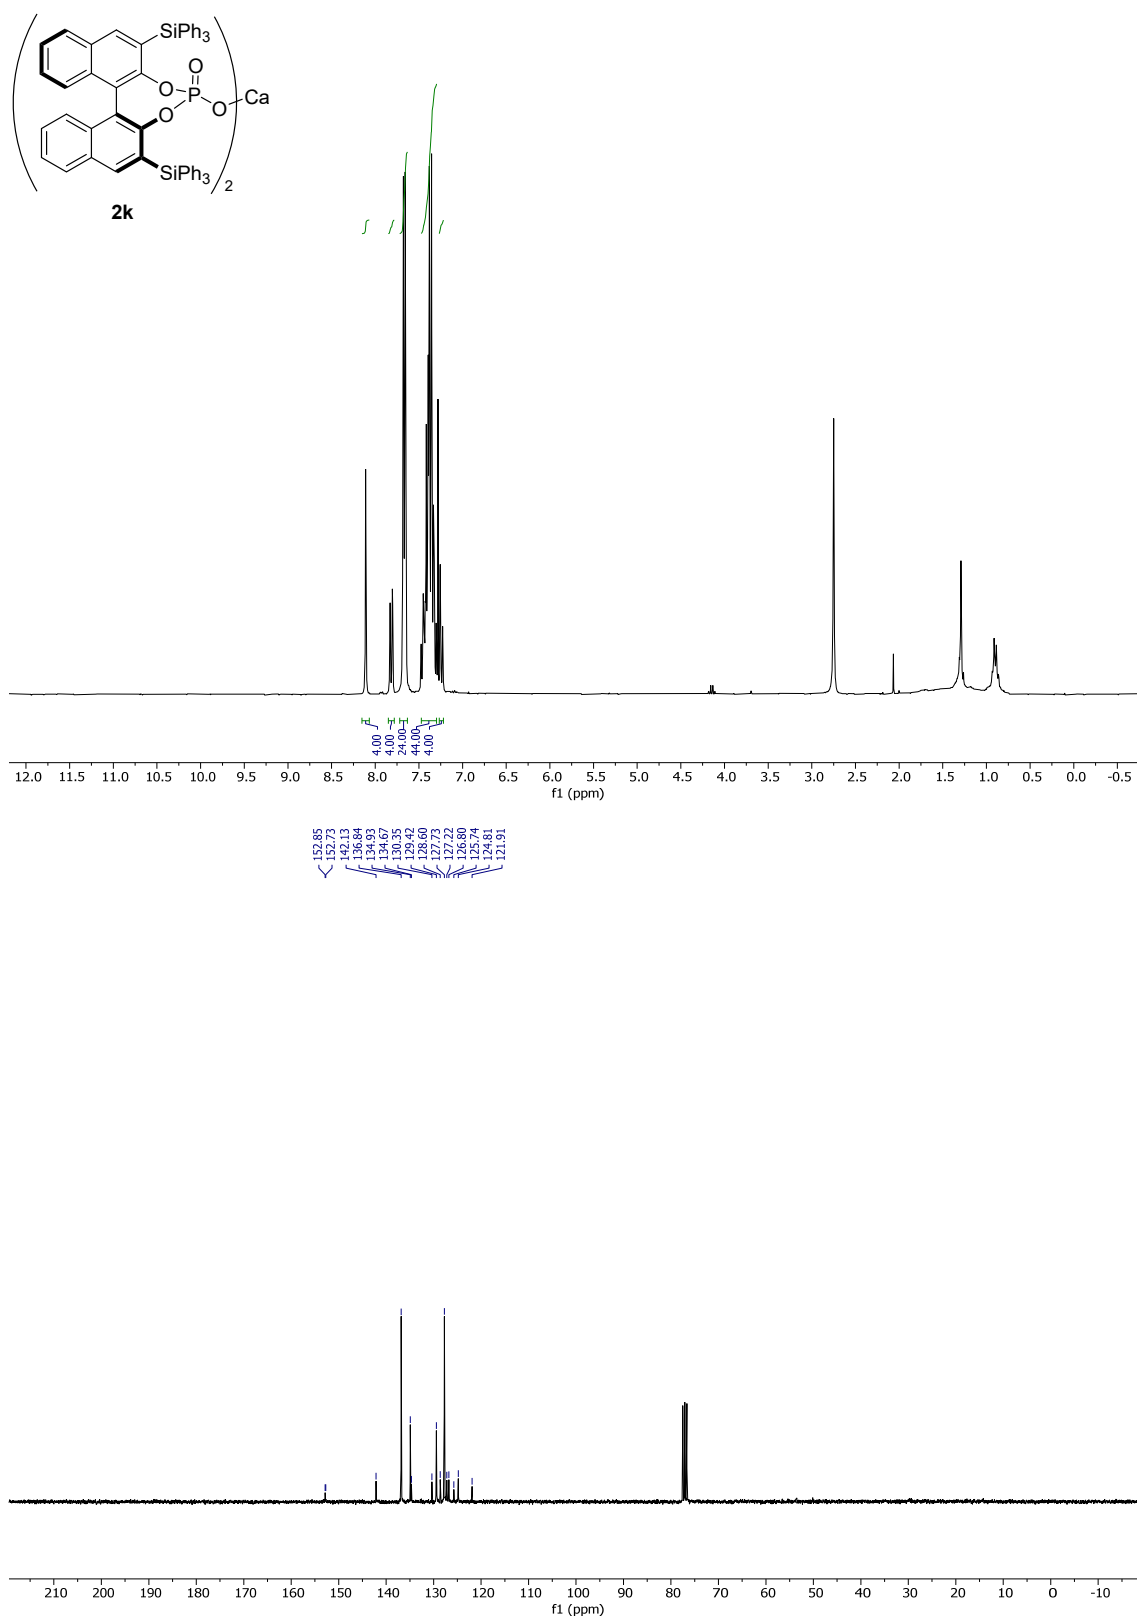

**Figure S48.** <sup>1</sup>H-NMR (300MHz, CDCl<sub>3</sub>) and <sup>13</sup>C{<sup>1</sup>H}-NMR (75.5MHz, CDCl<sub>3</sub>) of compound **2k**

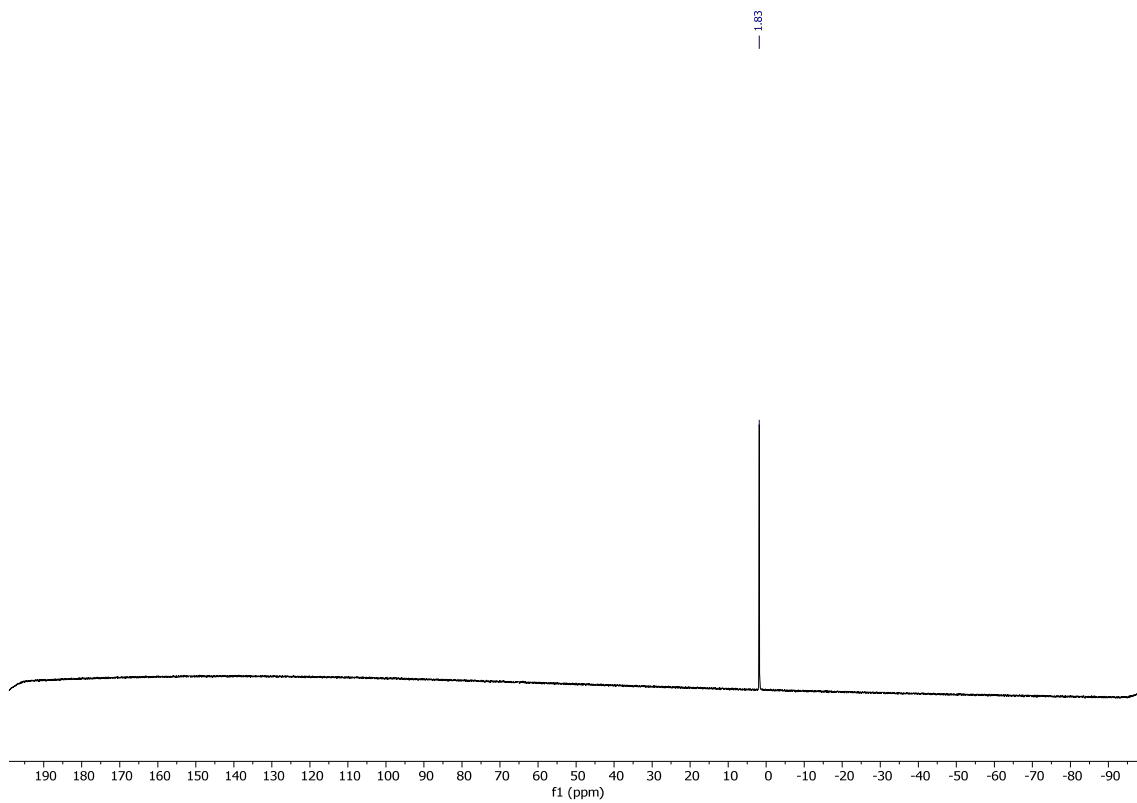

**Figure S49.**  $^{31}\text{P}$ -NMR (122MHz,  $\text{CDCl}_3$ ) of compound **2k**

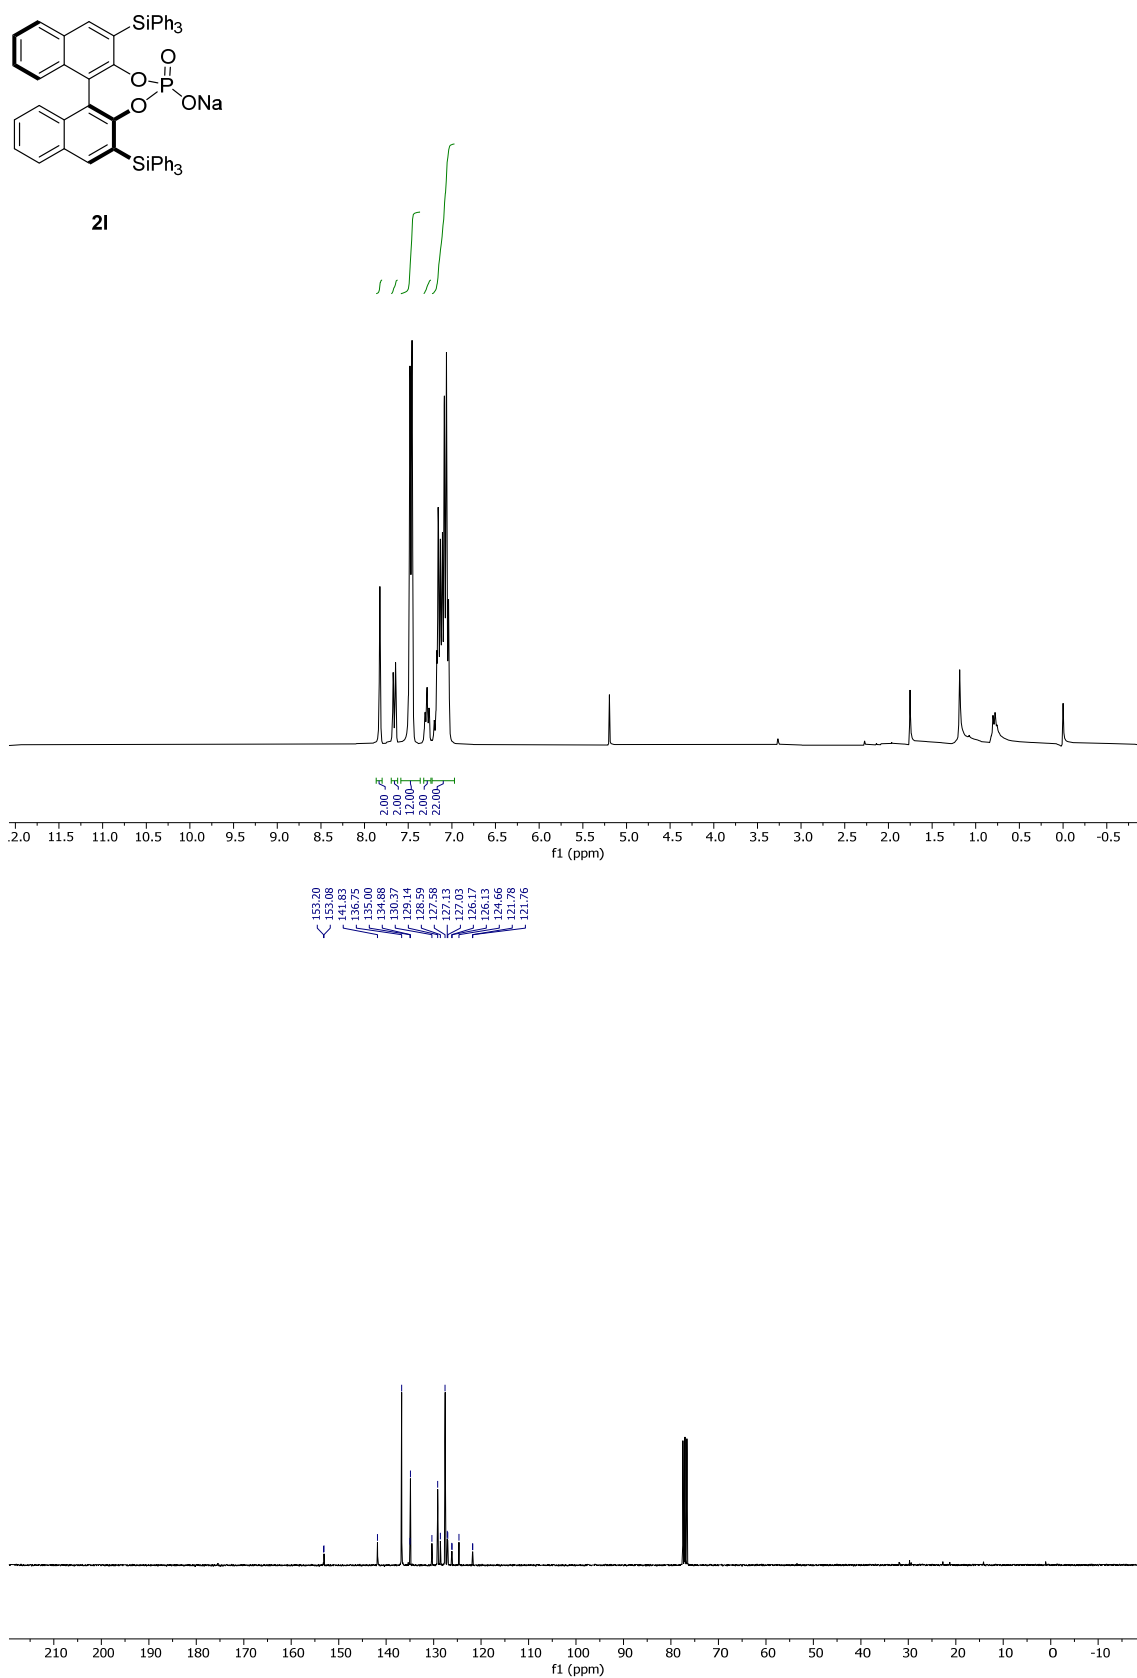

**Figure S50.**  $^1\text{H-NMR}$  (300MHz,  $\text{CDCl}_3$ ) and  $^{13}\text{C}\{^1\text{H}\}$ -NMR (75.5MHz,  $\text{CDCl}_3$ ) of compound **21**

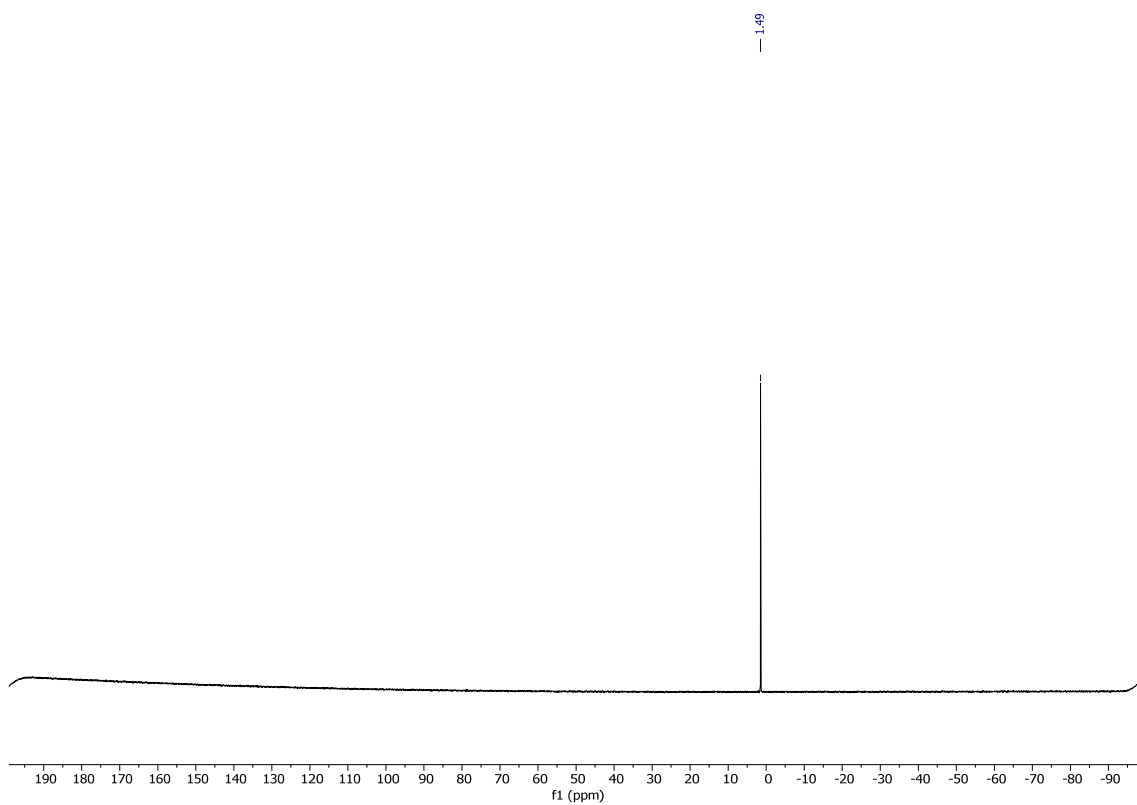

**Figure S51.**  $^{31}\text{P}$ -NMR (122MHz,  $\text{CDCl}_3$ ) of compound **21**

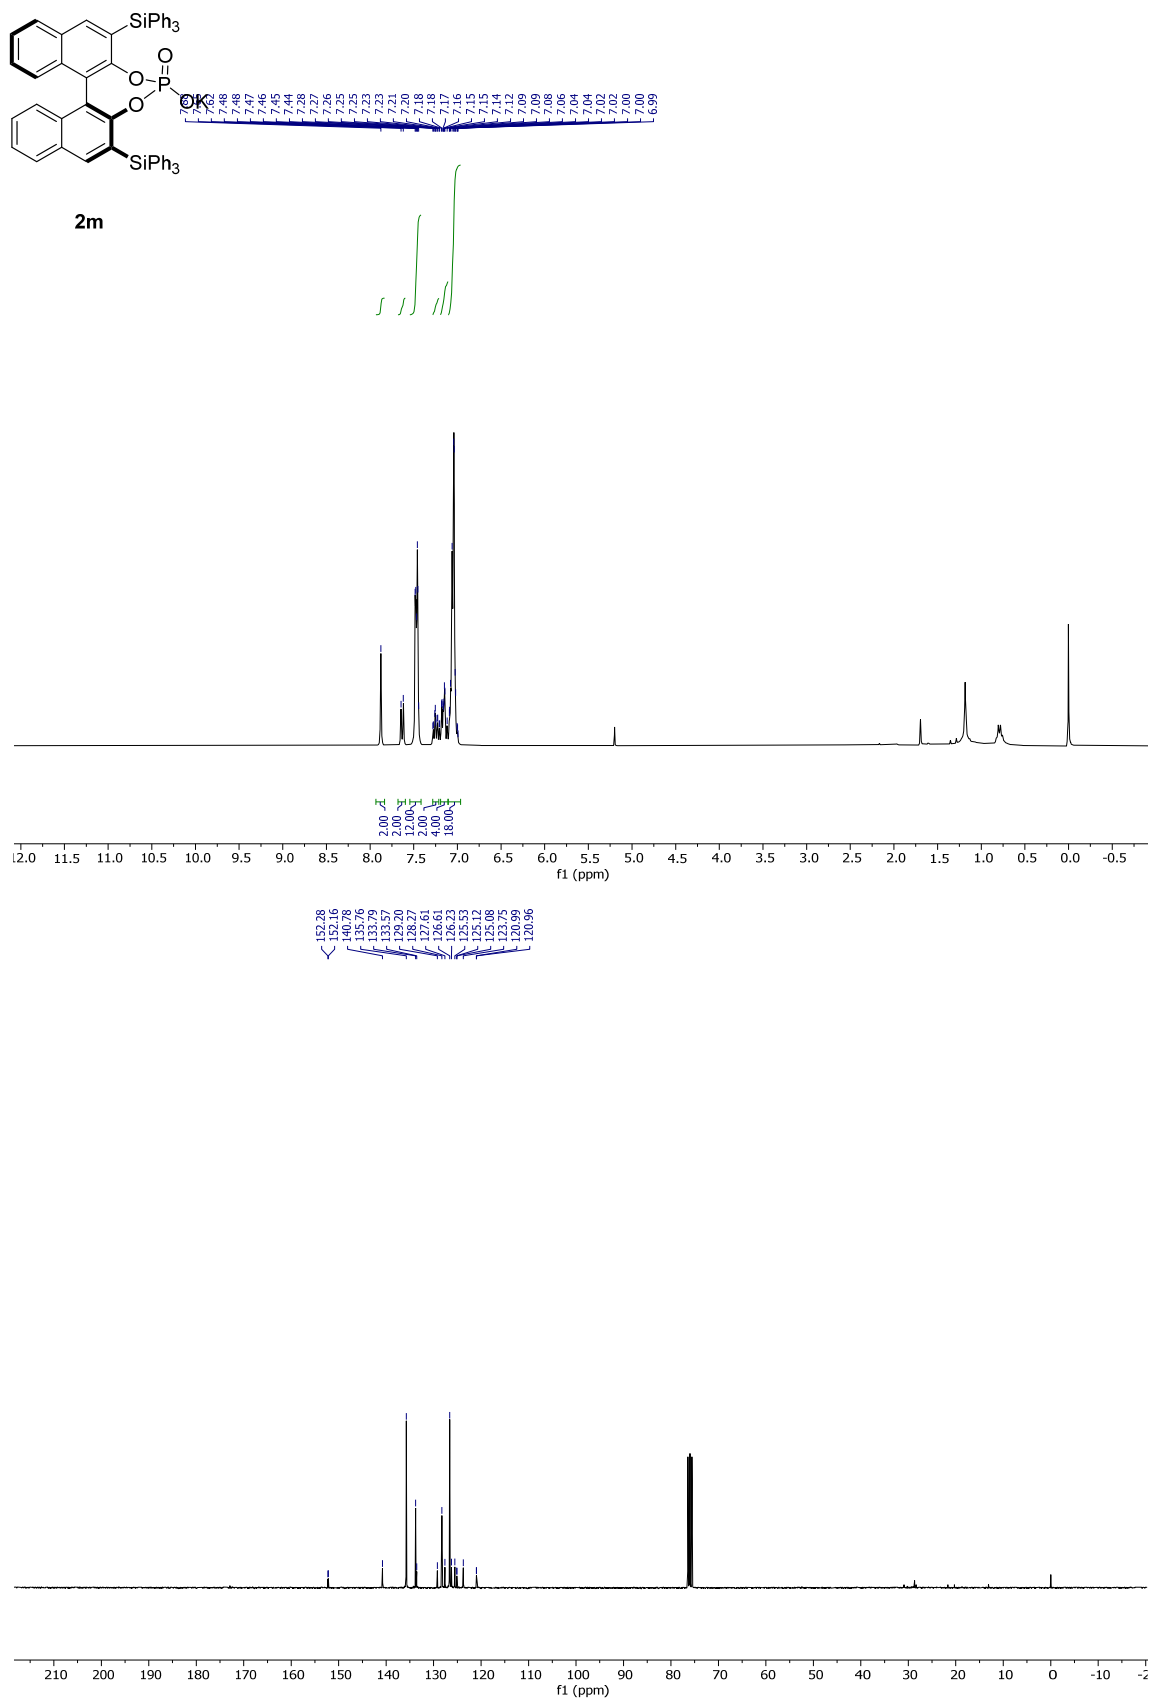

**Figure S52.** <sup>1</sup>H-NMR (300MHz, CDCl<sub>3</sub>) and <sup>13</sup>C{<sup>1</sup>H}-NMR (75.5MHz, CDCl<sub>3</sub>) of compound **2m**

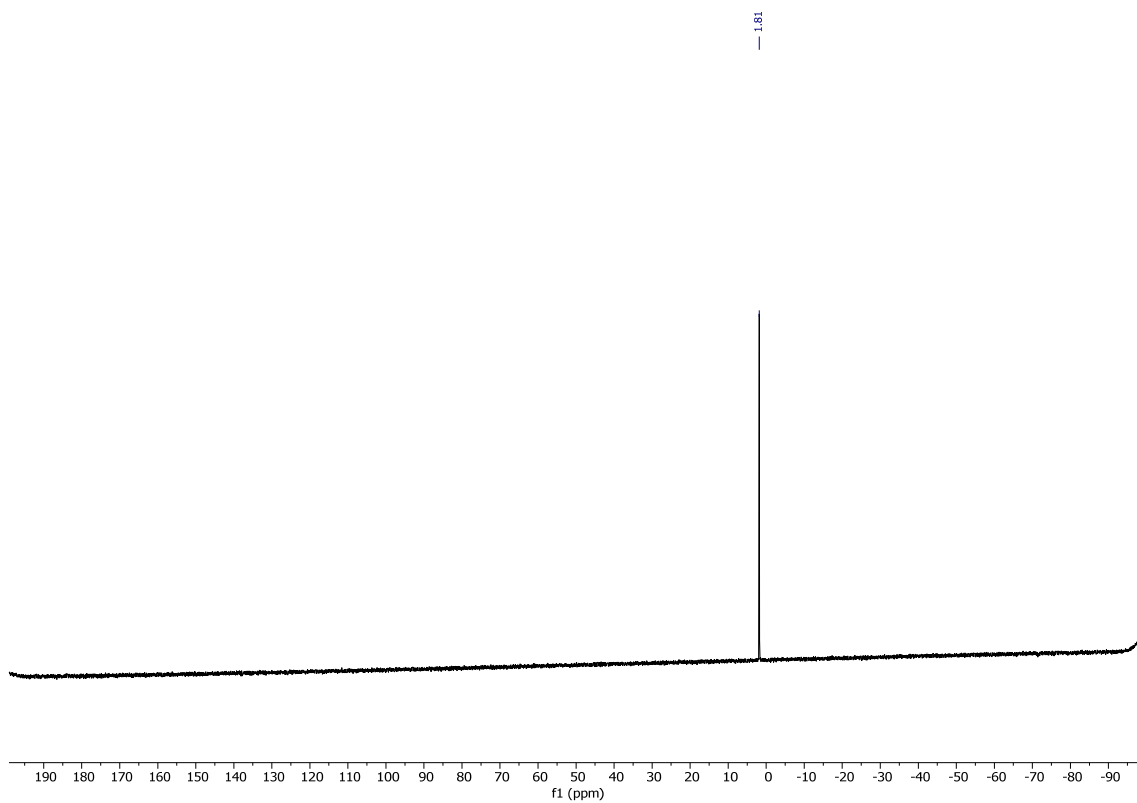

**Figure S53.**  $^{31}\text{P}$ -NMR (300MHz,  $\text{CDCl}_3$ ) of compound **2m**

# $^{31}\text{P}$ NMR (122 MHz, $\text{CDCl}_3$ ) spectra of catalyst mixtures for non linear effect study

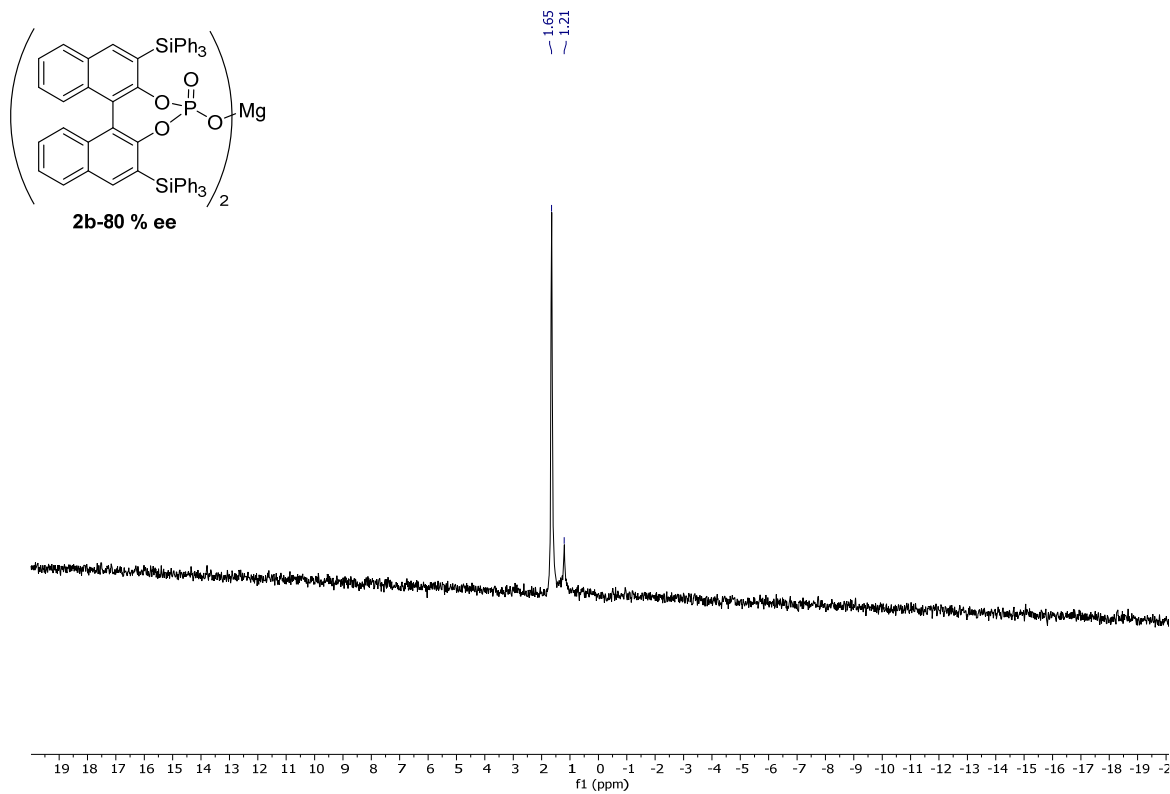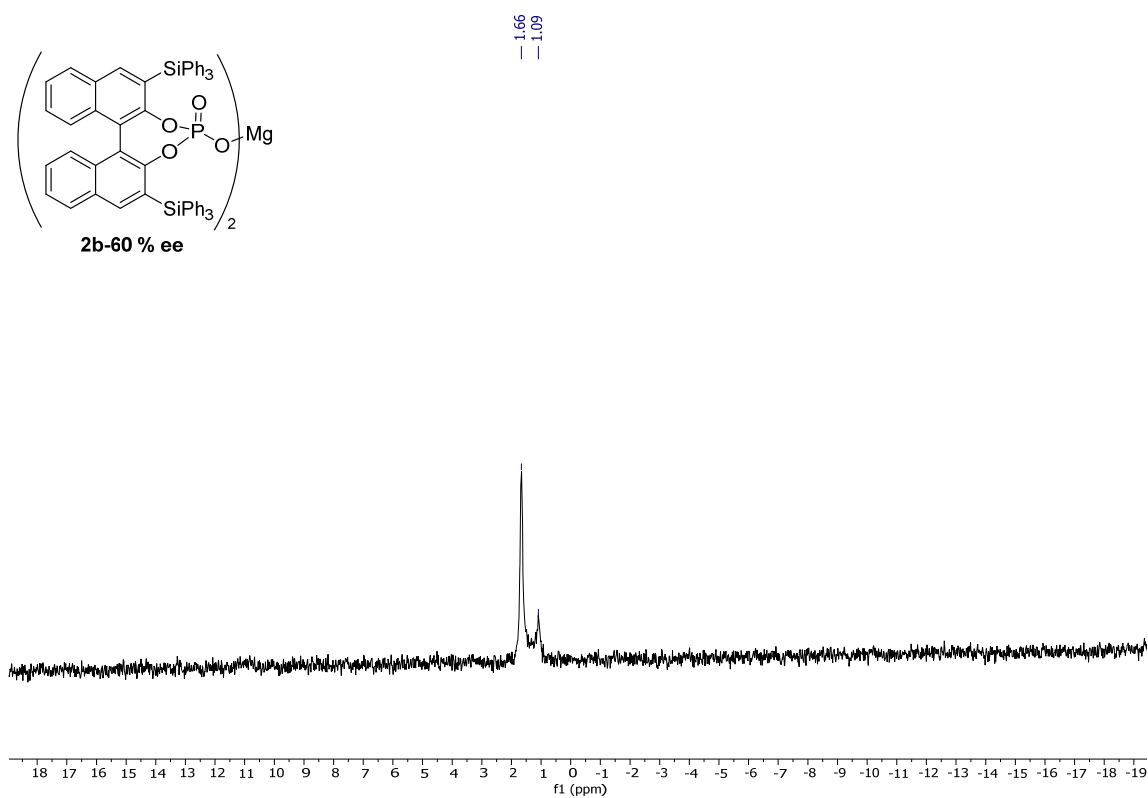

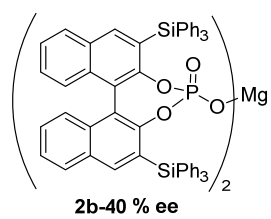

1.94  
1.46

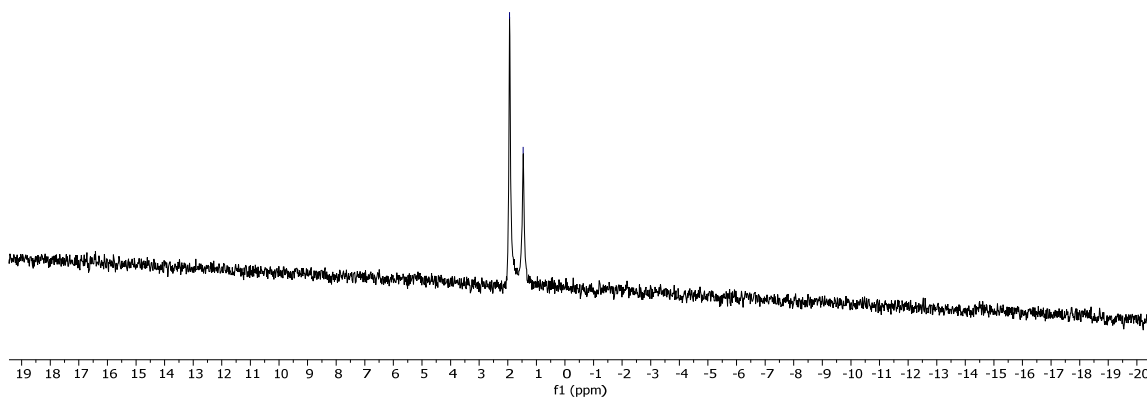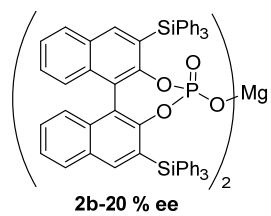

1.76  
1.26

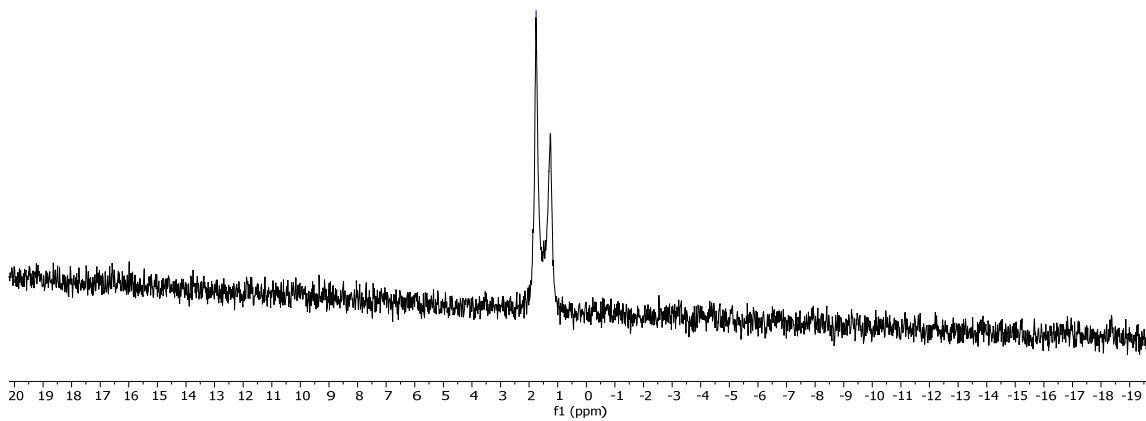



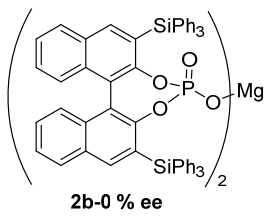

— 1.84  
— 1.28

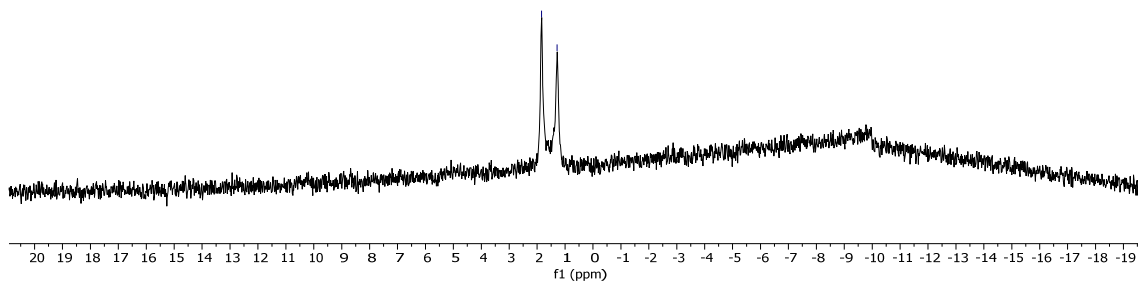

# HPLC analysis

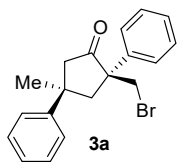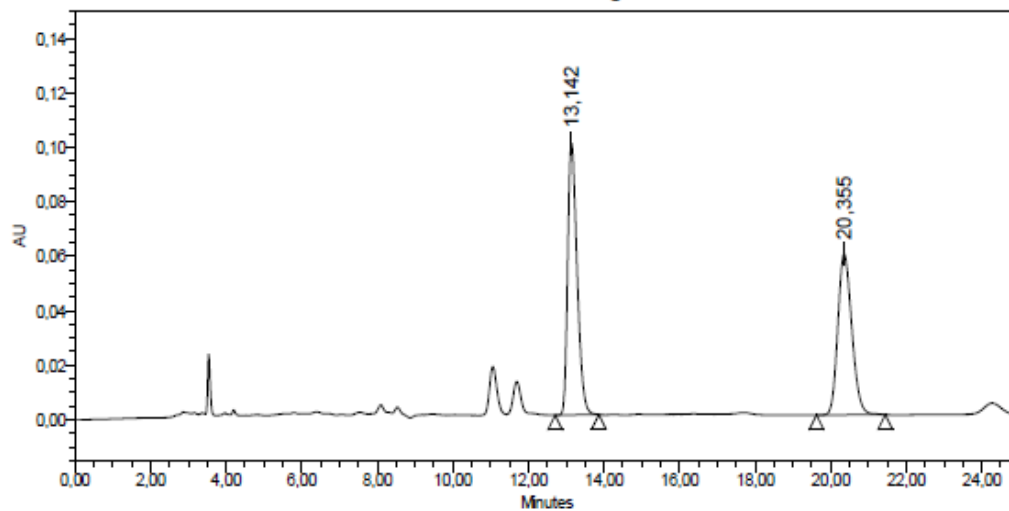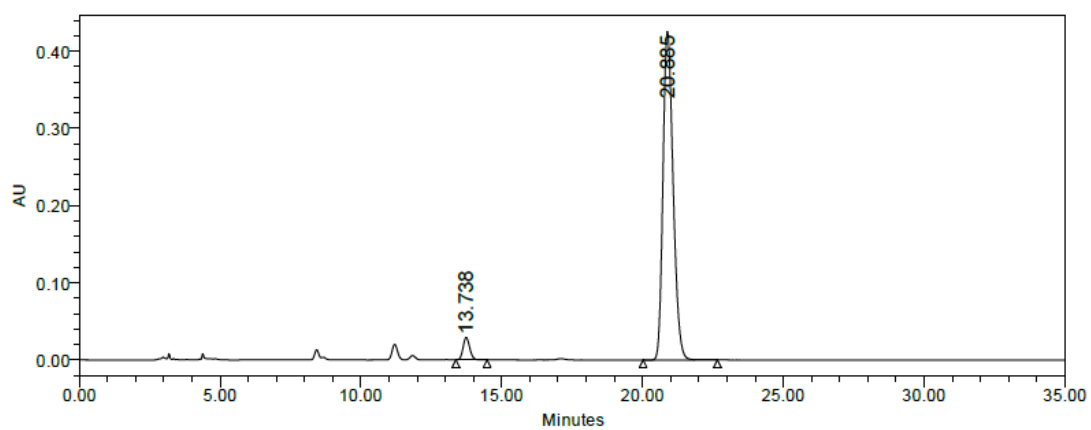

|   | RT     | Area     | % Area | Height |
|---|--------|----------|--------|--------|
| 1 | 13.738 | 473930   | 4.26   | 29000  |
| 2 | 20.885 | 10659848 | 95.74  | 425505 |

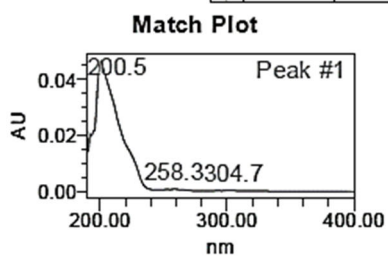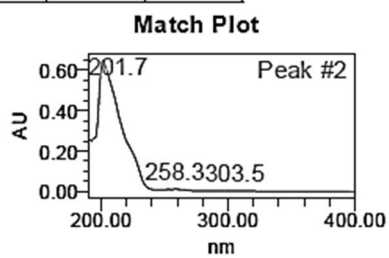

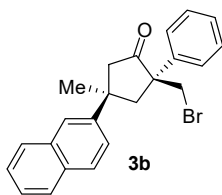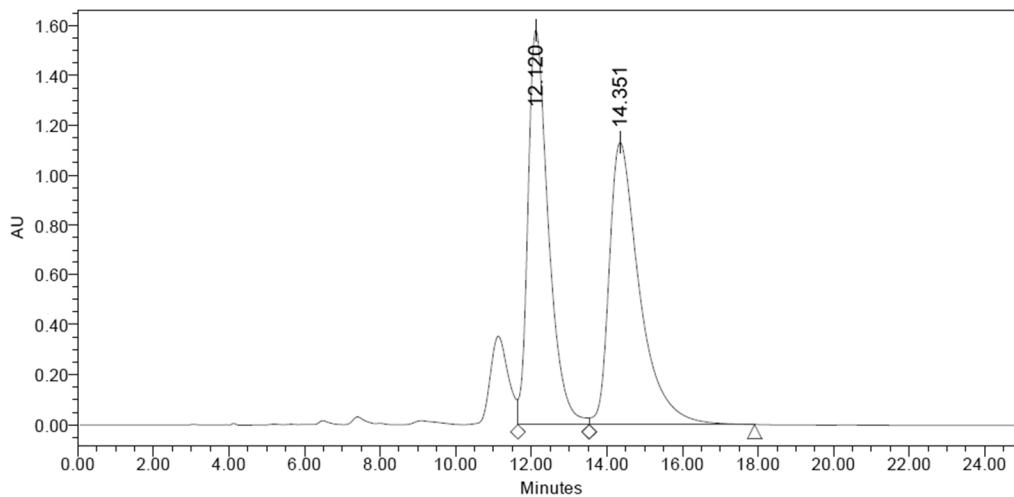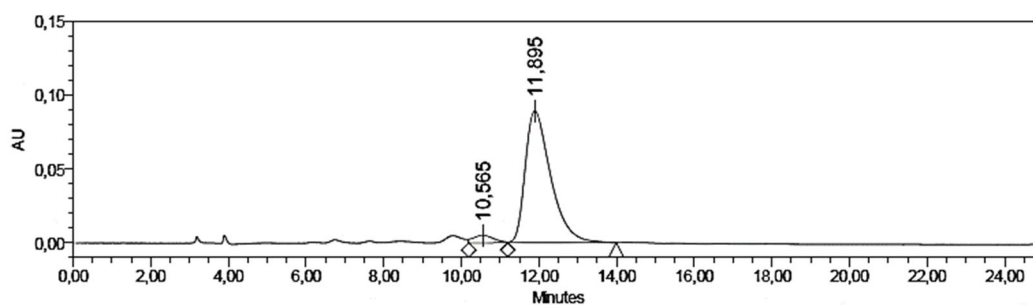

|   | RT     | Area    | Height | % Area |
|---|--------|---------|--------|--------|
| 1 | 10,565 | 189142  | 5256   | 4,43   |
| 2 | 11,895 | 4075833 | 89391  | 95,57  |

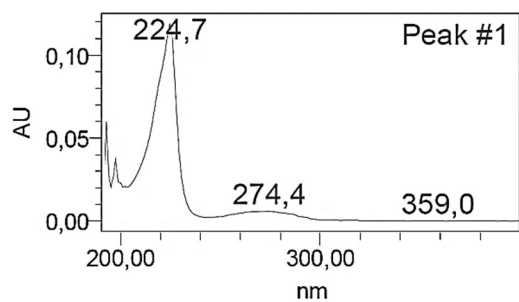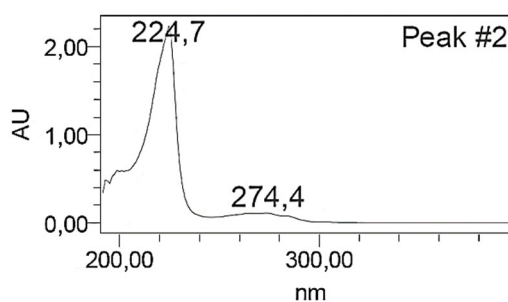

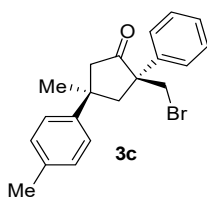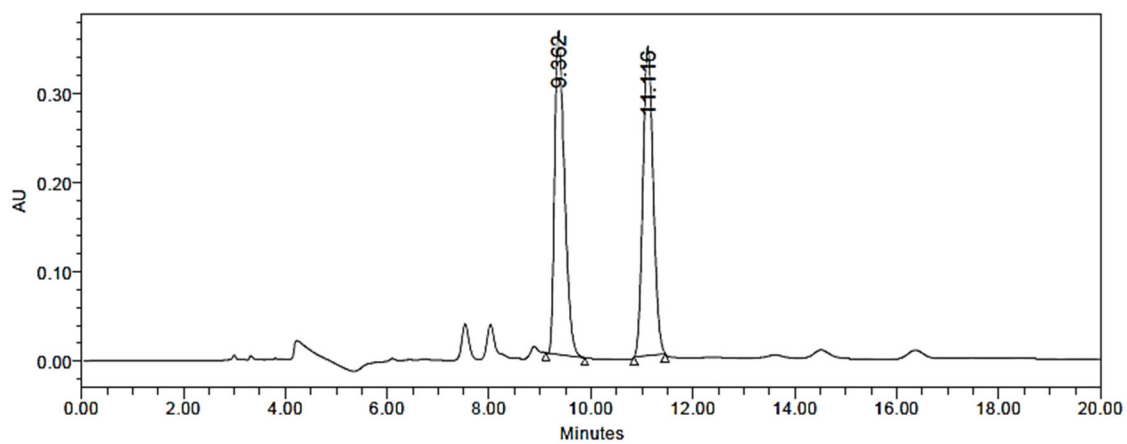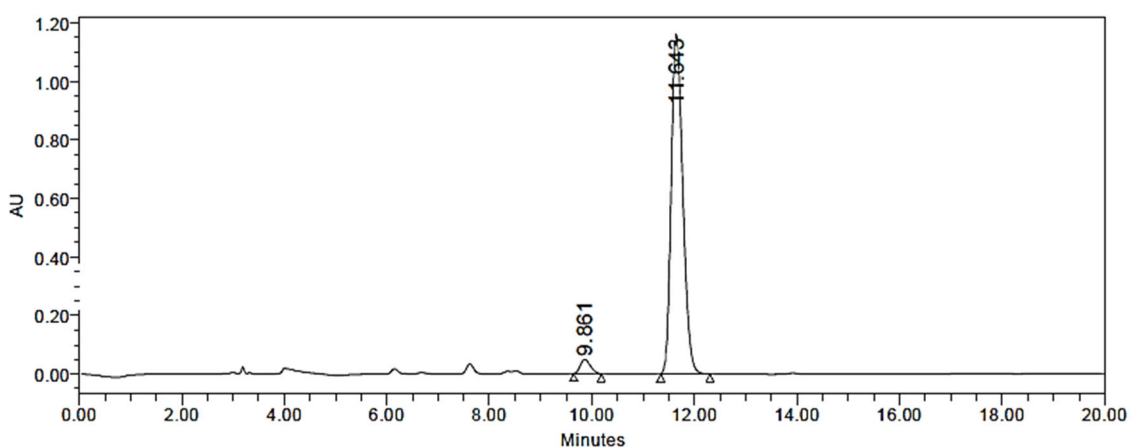

|   | RT     | Area     | % Area | Height  |
|---|--------|----------|--------|---------|
| 1 | 9.861  | 677340   | 3.58   | 49539   |
| 2 | 11.643 | 18259198 | 96.42  | 1159915 |

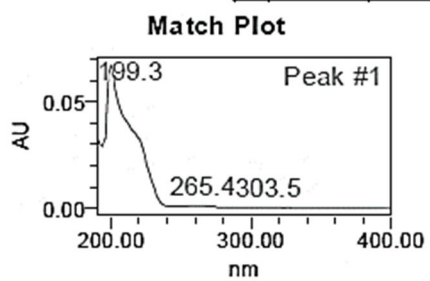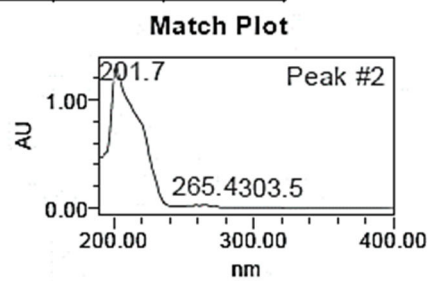

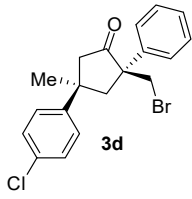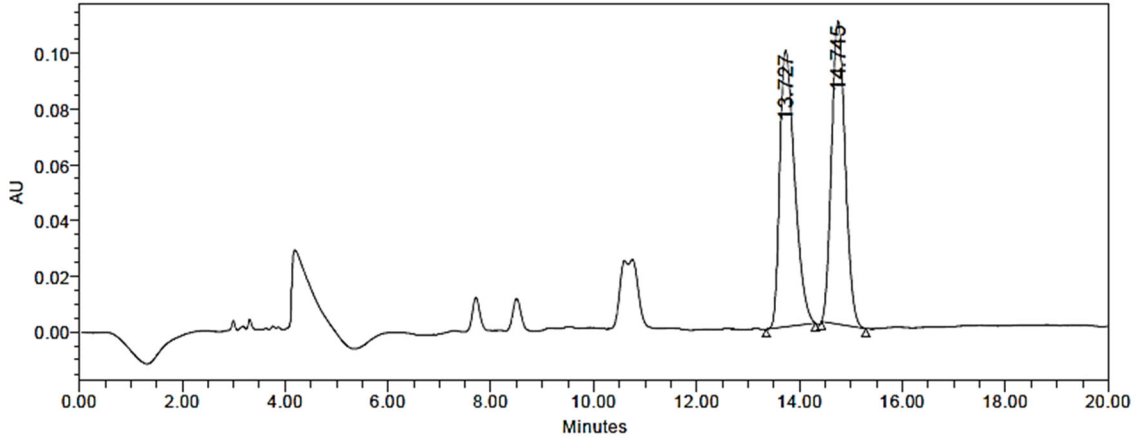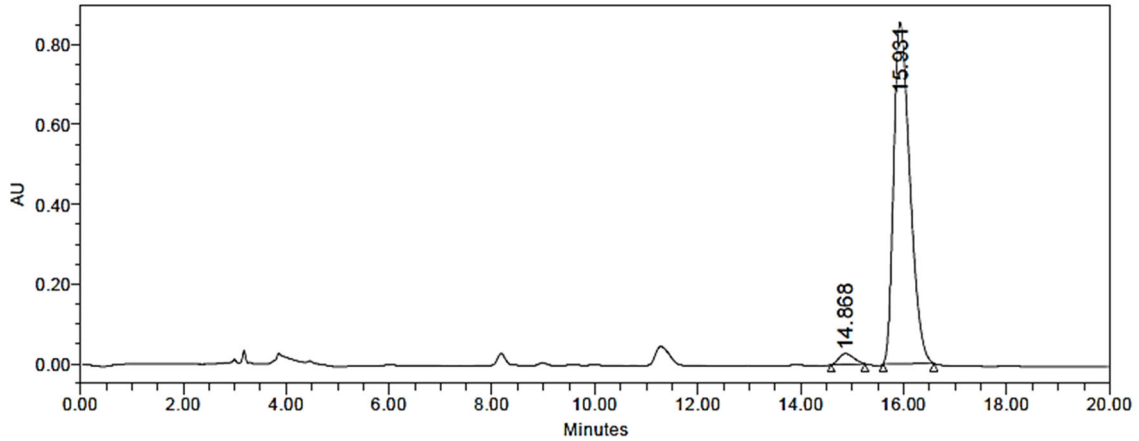

|   | RT     | Area     | % Area | Height |
|---|--------|----------|--------|--------|
| 1 | 14.868 | 537321   | 2.79   | 26877  |
| 2 | 15.931 | 18752930 | 97.21  | 853895 |

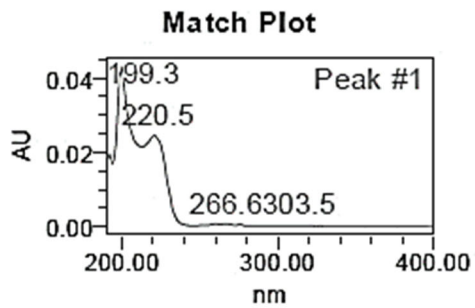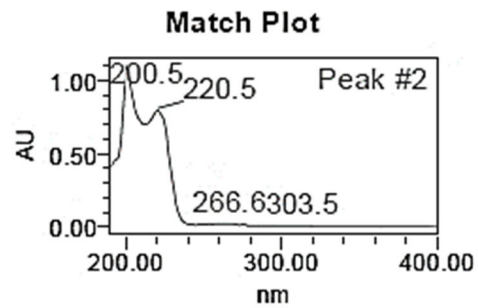

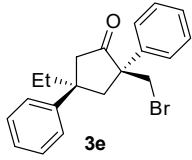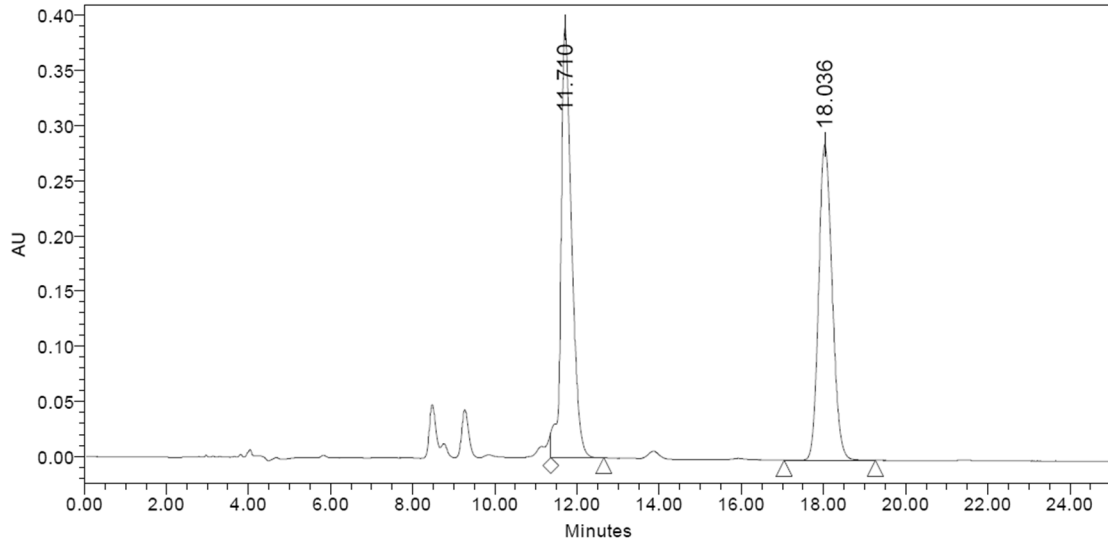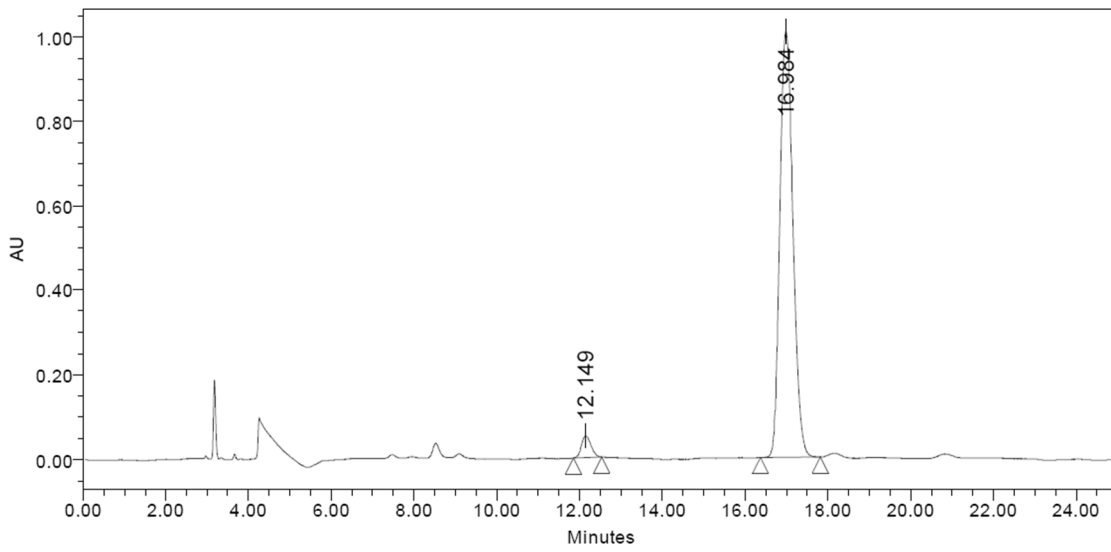

|   | Injection | RT     | Area     | % Area |
|---|-----------|--------|----------|--------|
| 1 | 1         | 12.149 | 814443   | 3.55   |
| 2 | 1         | 16.984 | 22135034 | 96.45  |

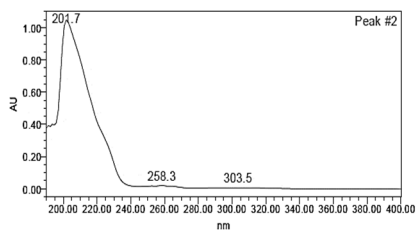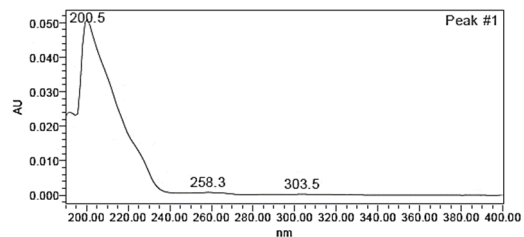

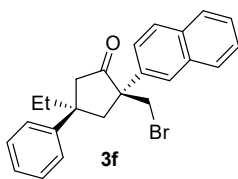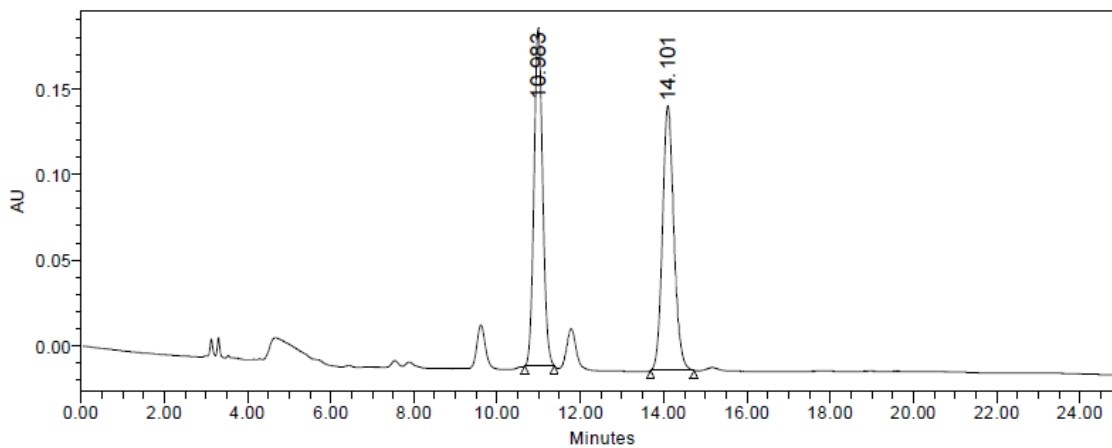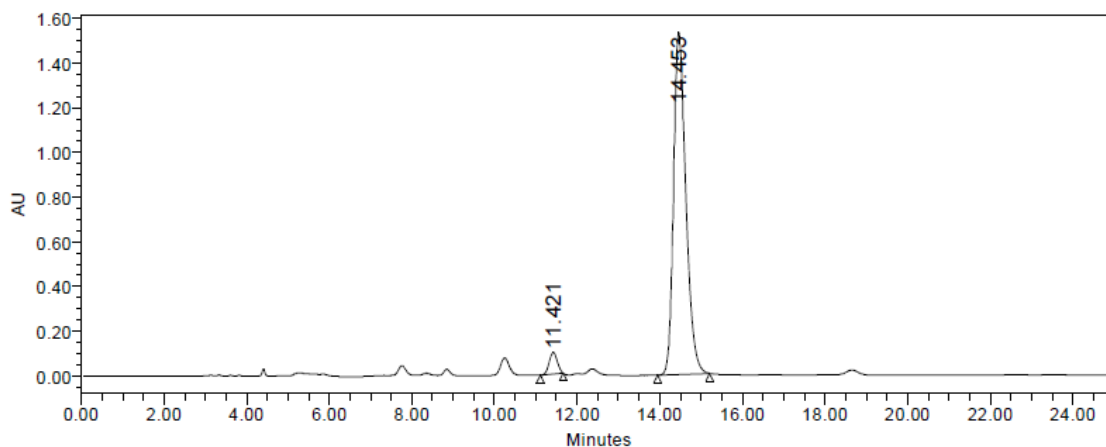

|   | RT     | Area     | % Area | Height  |
|---|--------|----------|--------|---------|
| 1 | 11.421 | 1315431  | 4.03   | 96398   |
| 2 | 14.453 | 31290341 | 95.97  | 1528391 |

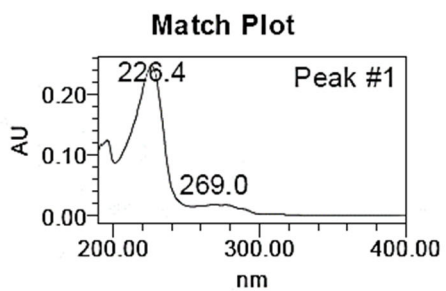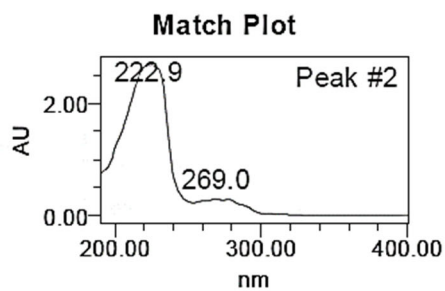

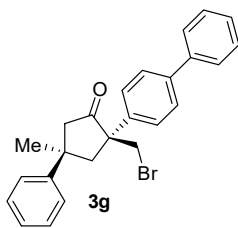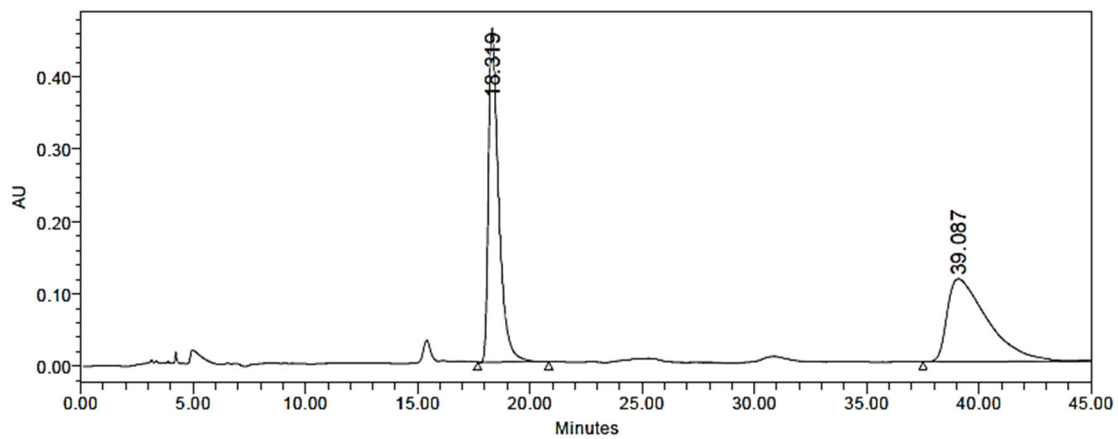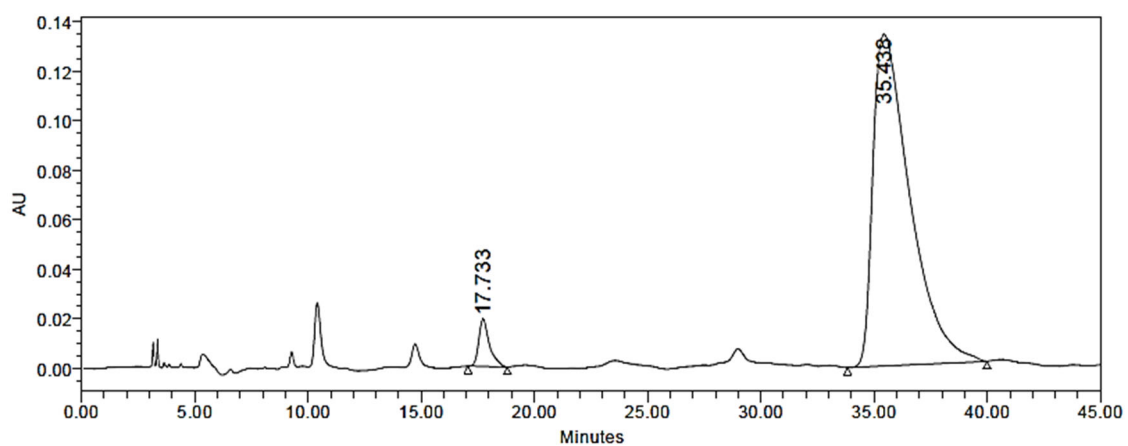

|   | RT     | Area     | % Area | Height |
|---|--------|----------|--------|--------|
| 1 | 17.733 | 628218   | 3.97   | 19161  |
| 2 | 35.438 | 15204624 | 96.03  | 134084 |

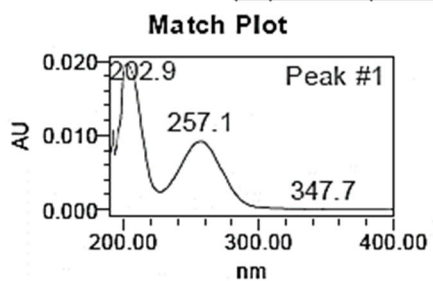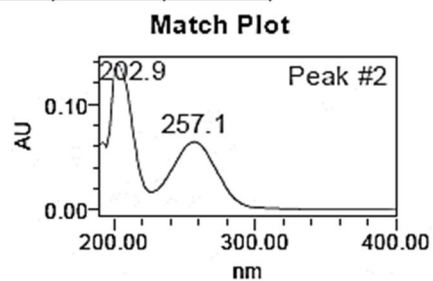



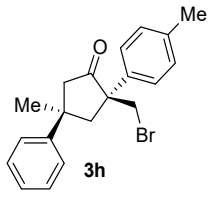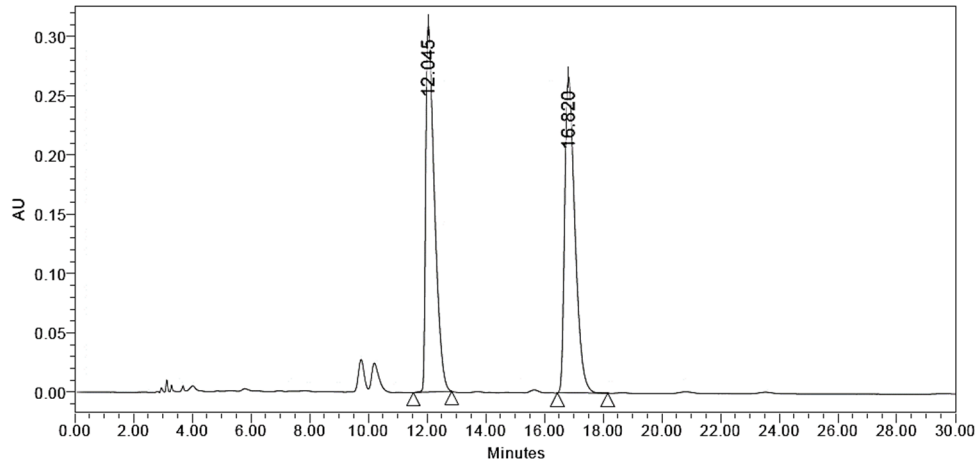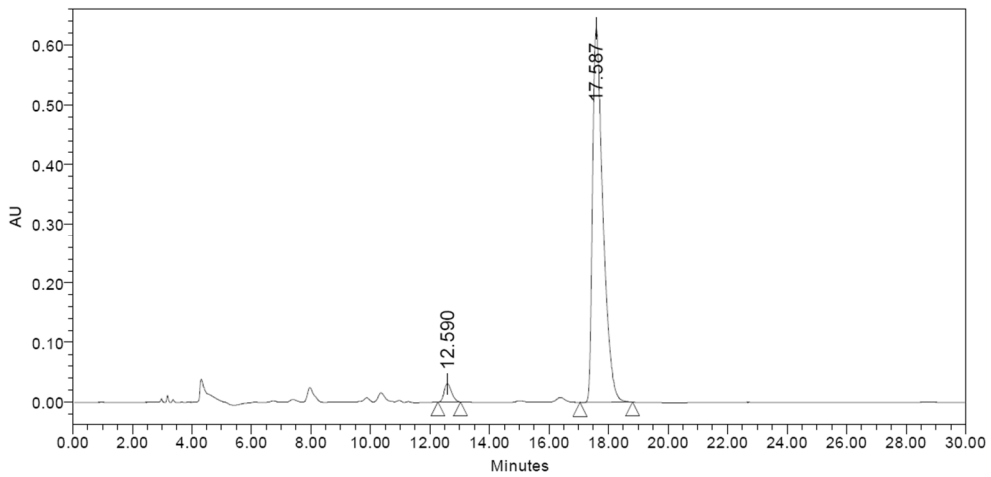

|   | Injection | RT     | Area     | % Area |
|---|-----------|--------|----------|--------|
| 1 | 1         | 12.590 | 528568   | 3.34   |
| 2 | 1         | 17.587 | 15307050 | 96.66  |

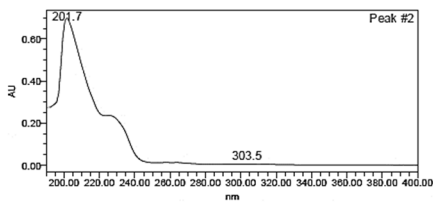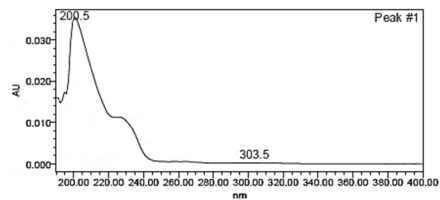

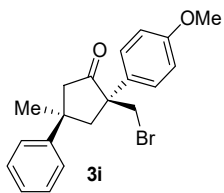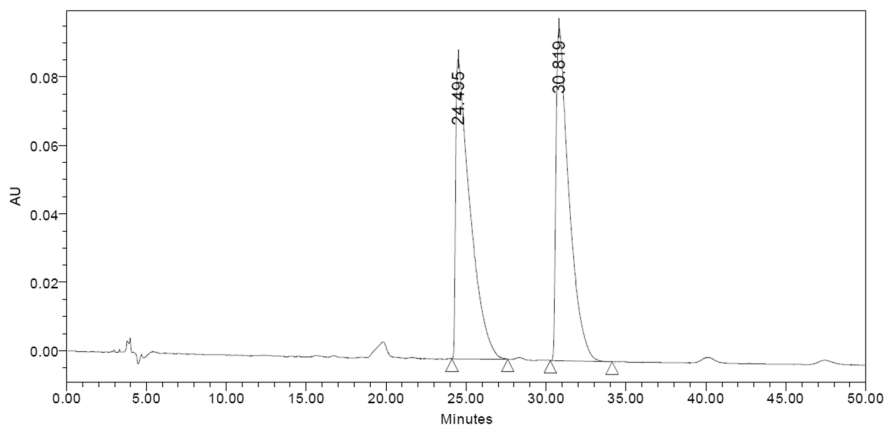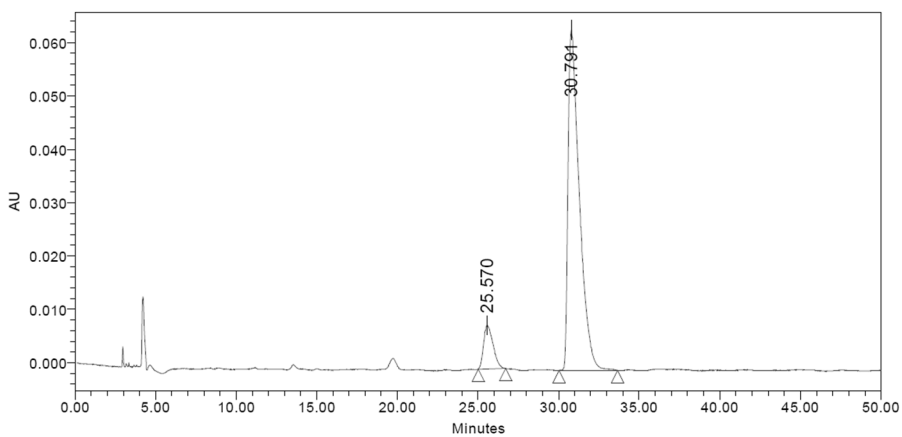

|   | Injection | RT     | Area    | % Area |
|---|-----------|--------|---------|--------|
| 1 | 1         | 30.792 | 1685638 | 90.31  |
| 2 | 1         | 25.566 | 180798  | 9.69   |

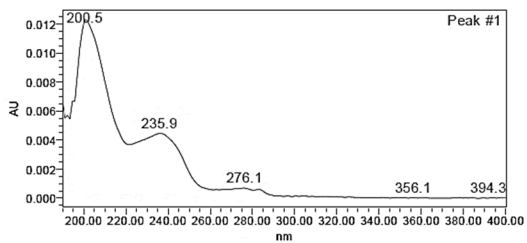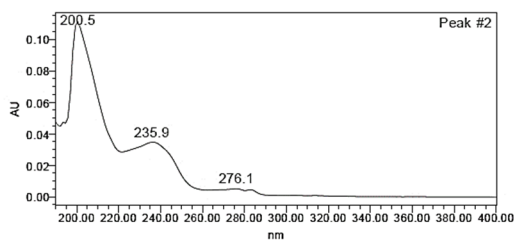

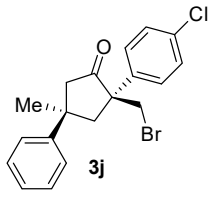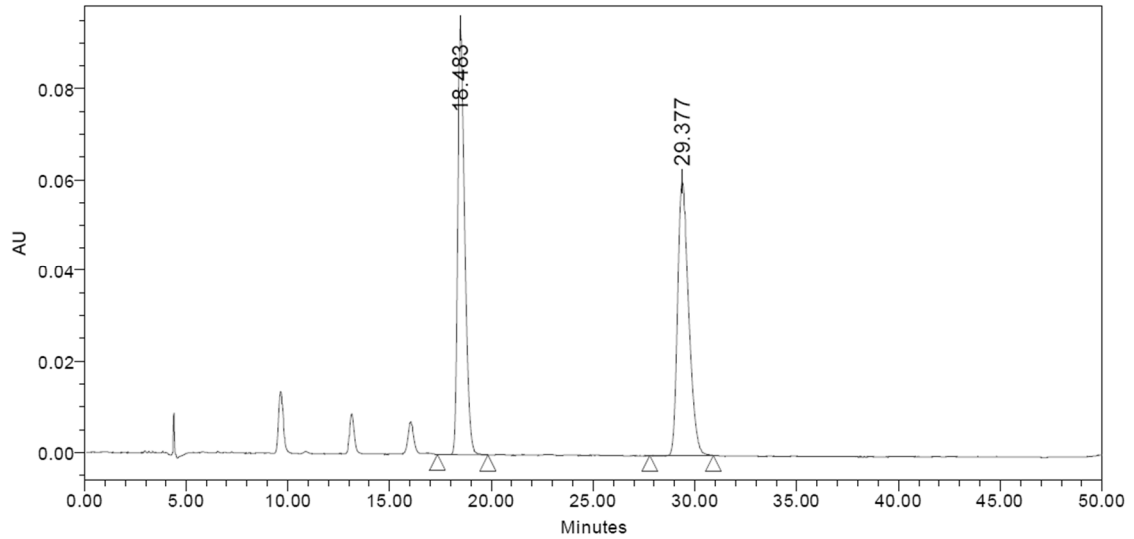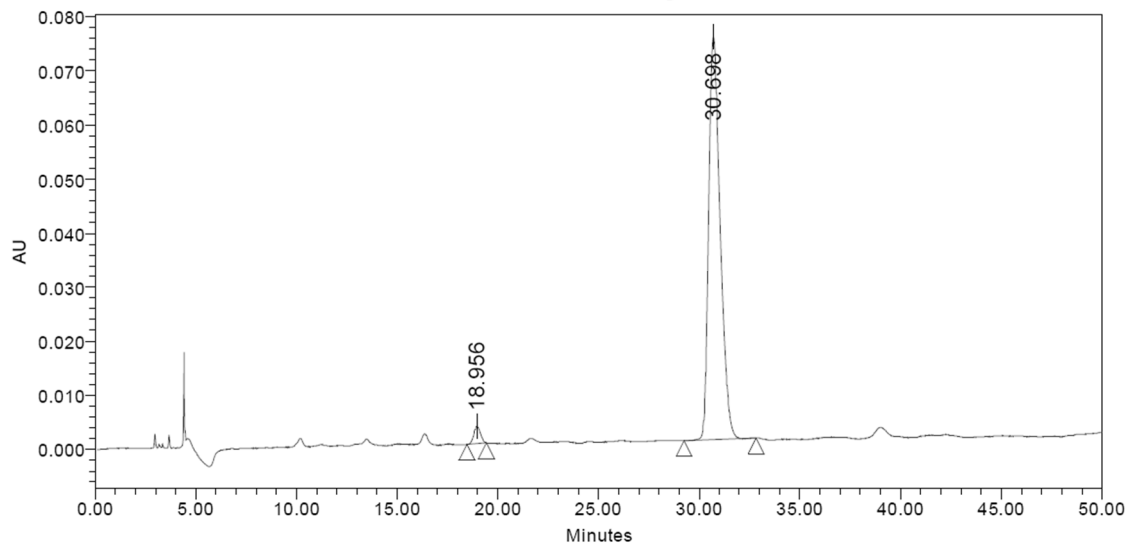

|   | Injection | RT     | Area    | % Area |
|---|-----------|--------|---------|--------|
| 1 | 1         | 18.960 | 46809   | 2.42   |
| 2 | 1         | 30.699 | 1887357 | 97.58  |

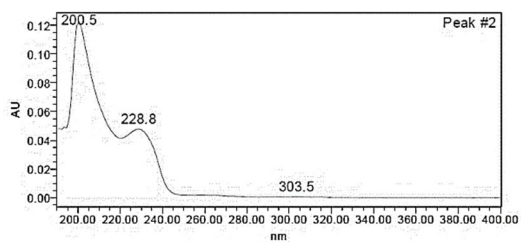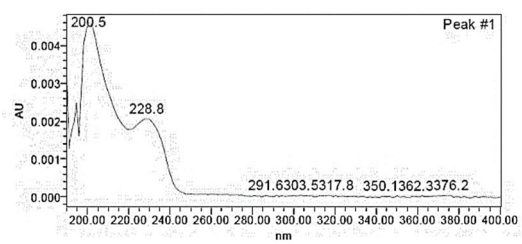

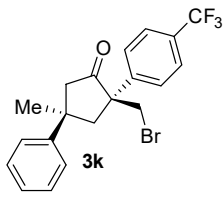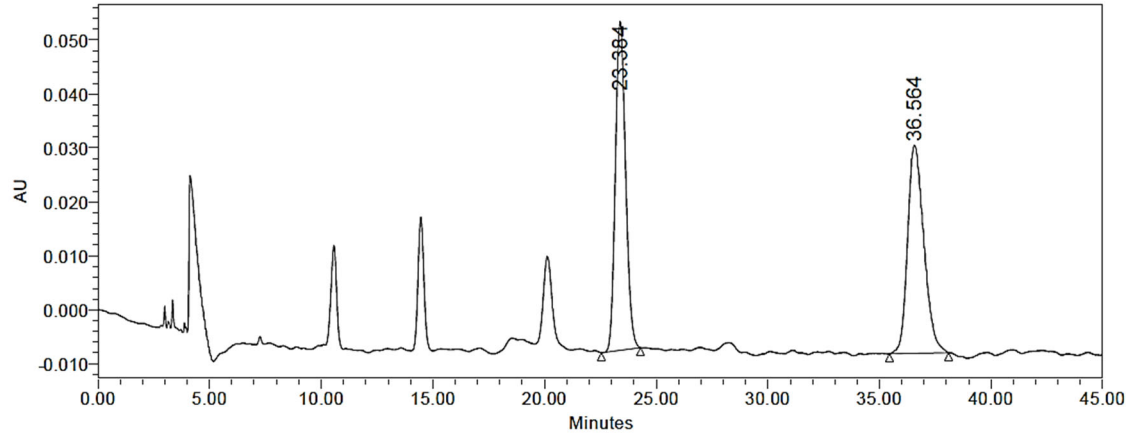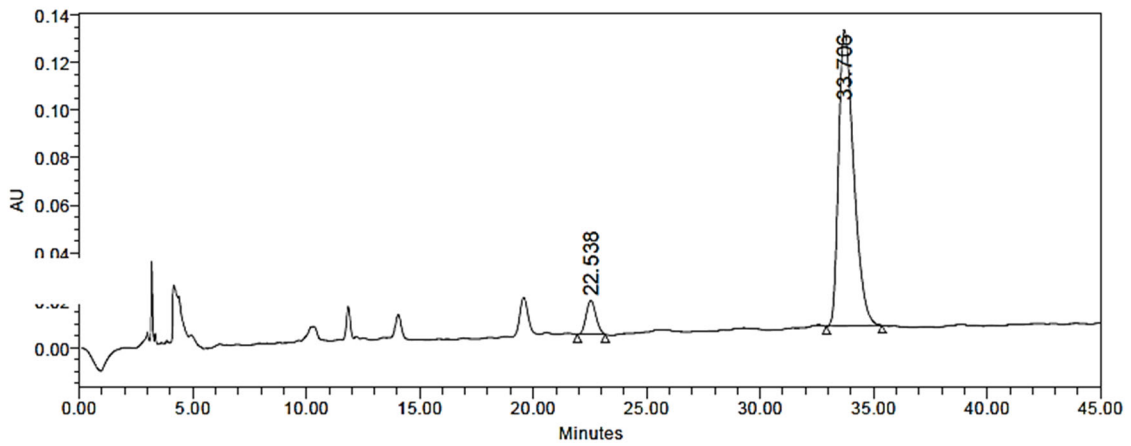

|   | RT     | Area    | % Area | Height |
|---|--------|---------|--------|--------|
| 1 | 22.538 | 430251  | 6.92   | 14329  |
| 2 | 33.706 | 5790716 | 93.08  | 124214 |

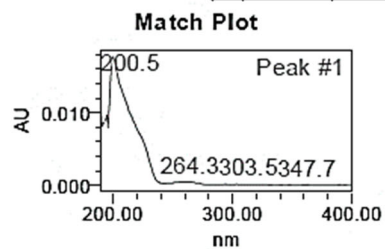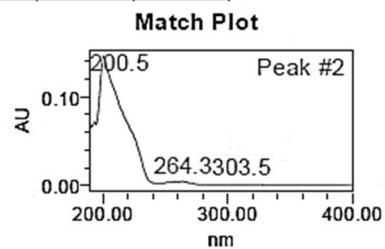

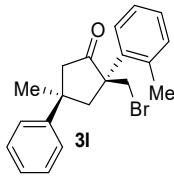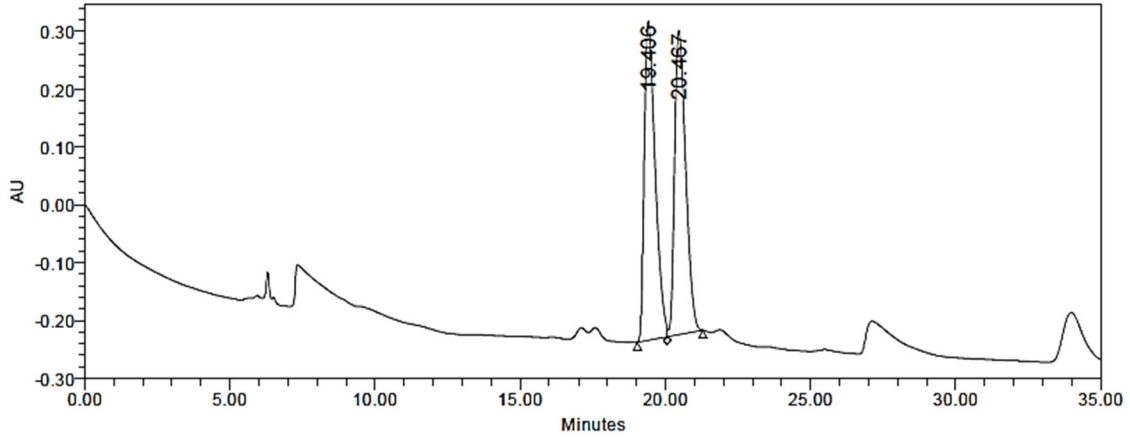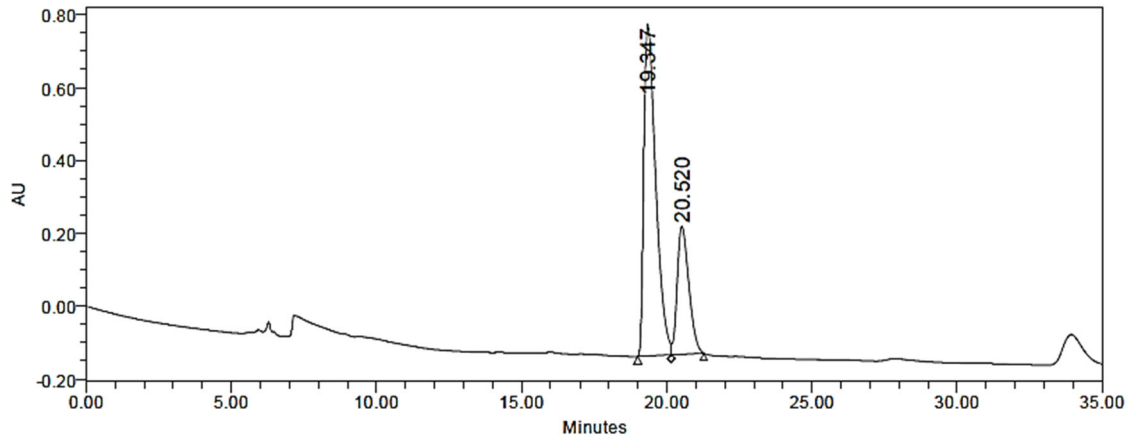

|   | RT     | Area     | % Area | Height |
|---|--------|----------|--------|--------|
| 1 | 19.347 | 25694210 | 72.36  | 908764 |
| 2 | 20.520 | 9816905  | 27.64  | 351098 |

Match Plot

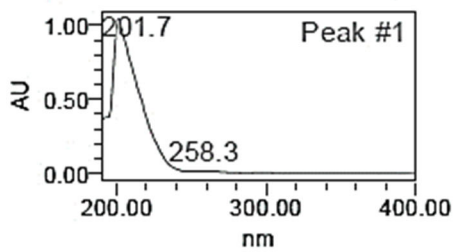

Match Plot

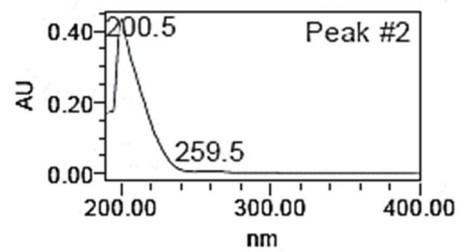

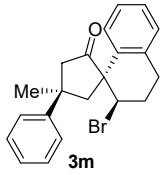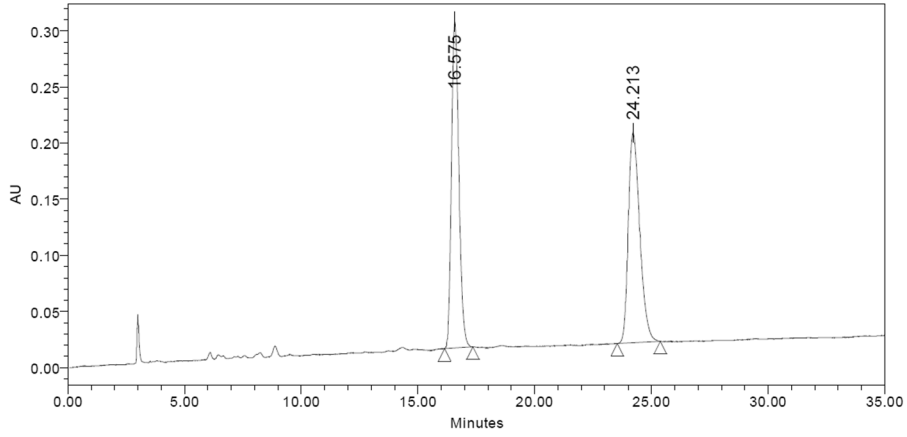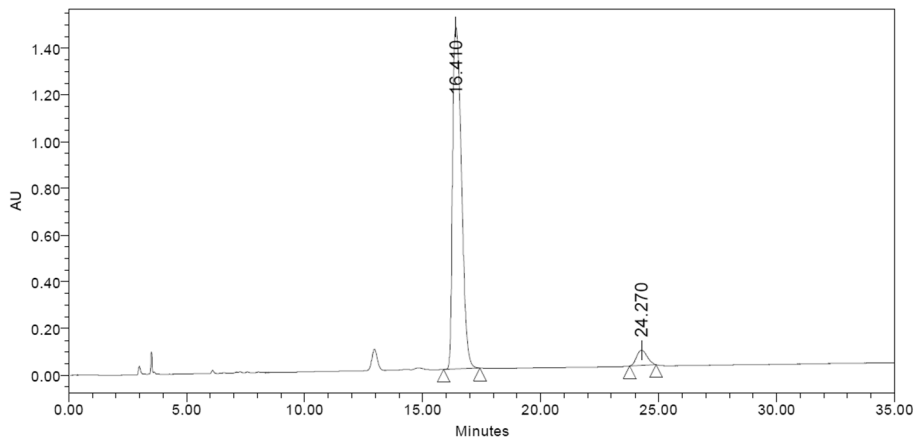

|   | Injection | RT     | Area     | % Area |
|---|-----------|--------|----------|--------|
| 1 | 1         | 24.270 | 2038597  | 5.09   |
| 2 | 1         | 16.410 | 38036398 | 94.91  |

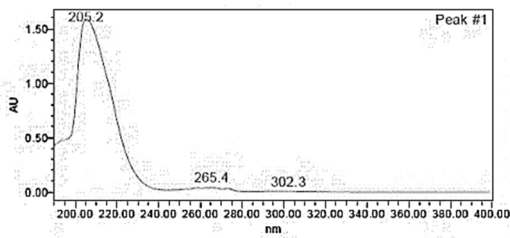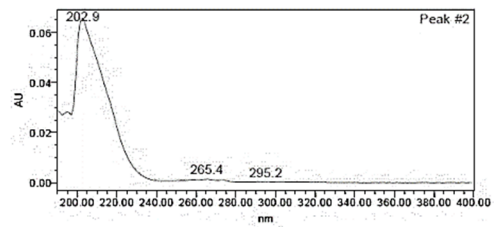

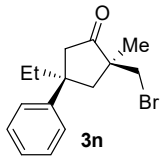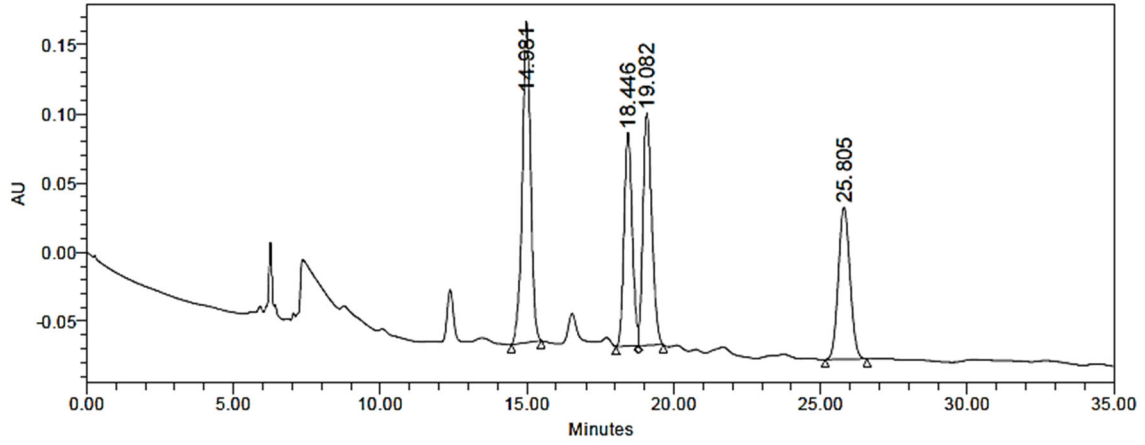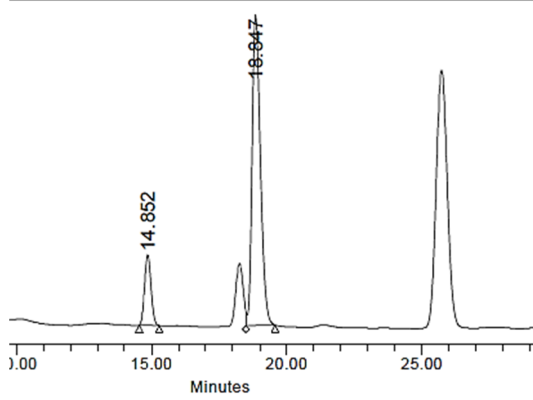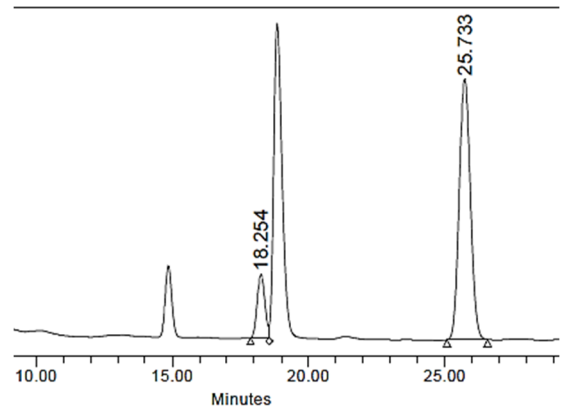

|   | RT     | Area    | % Area | Height |
|---|--------|---------|--------|--------|
| 1 | 14.852 | 1701156 | 14.81  | 103840 |
| 2 | 18.847 | 9786127 | 85.19  | 457435 |

|   | RT     | Area     | % Area | Height |
|---|--------|----------|--------|--------|
| 1 | 18.254 | 1763463  | 14.20  | 92327  |
| 2 | 25.733 | 10654502 | 85.80  | 380254 |

Match Plot

Match Plot

Match Plot

Match Plot

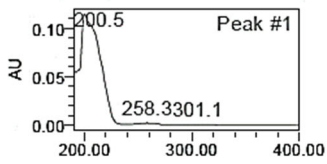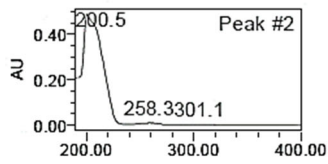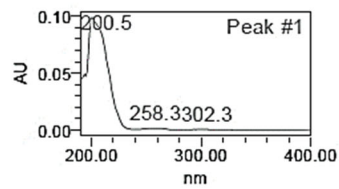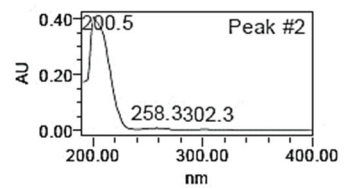

## Computational Studies

### The Catalyst

A close inspection of the minimized structure of the catalyst revealed a linear disposition for the coordination of the magnesium atom due to the large size of the triphenylsilyl moieties (Figure S9), in a similar way to that reported for a chiral Pd-bis-phosphate catalyst.<sup>17</sup> In our case, two aromatic rings from one phosphate and one from the other phosphate compose a cage in which the metal atom can interact favorably with the electron density of the aromatic rings as evidenced in the NCI analysis (Figure S10) in a similar way to that reported for cationic magnesium  $\pi$ -arene complexes.<sup>18</sup>

The structure of the catalyst does not allow the simultaneous coordination of the substrate and the NBS as required in model **A** (see main text) without any previous decoordination. Moreover, the arene stabilization might allow the formation of an ionic pair presenting  $\eta^3$ -arene-Mg interactions leading to model **B** (see main text) after interaction with the substrate.

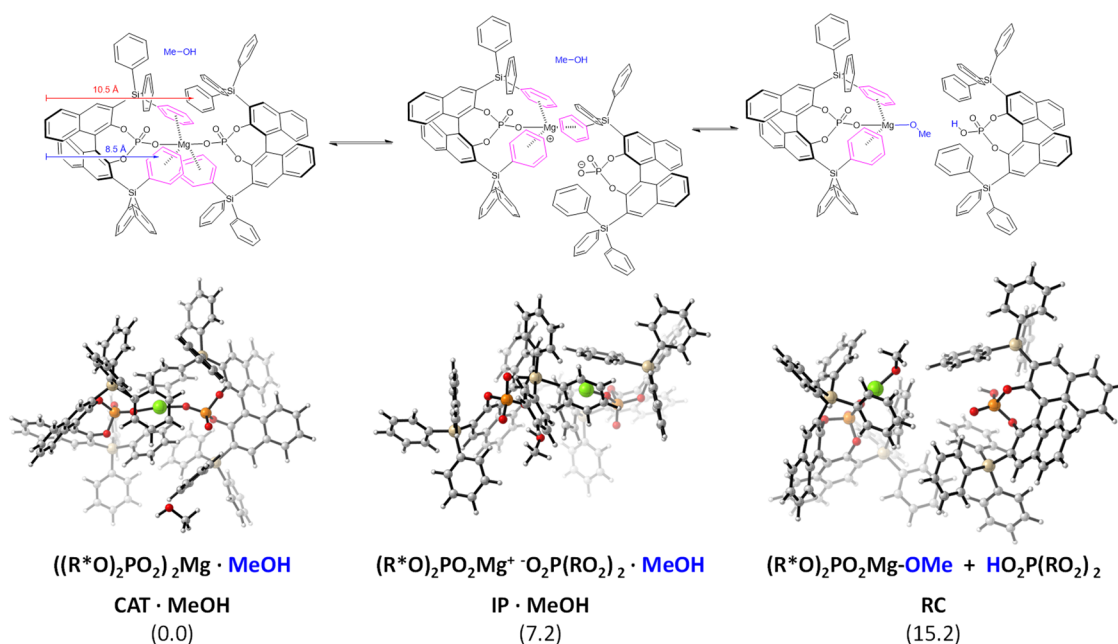

**Figure S 54.** Optimized structure (PM6) of the catalyst **2b** as a complex (**CAT**) and as an ionic pair (**IP**) (in the presence of a molecule of MeOH), and once the alcohol is deprotonated and coordinated to form a reactive complex **RC** with an only unit of phosphate (the other is protonated in the form of phosphoric acid). Relative energies are given in kcal/mol.

<sup>17</sup> Jindal, G.; Sunoj, R. B. Deciphering the Origin of Stereinduction in Cooperative Asymmetric Catalysis Involving Pd(II) and a Chiral Brønsted Acid. *Org. Lett.* **2015**, *17*, 2874-2877.

<sup>18</sup> Pahl, J.; Friedrich, A.; Elsen, H.; Harder, S. Cationic Magnesium  $\pi$ -Arene Complexes. *Organometallics* **2018**, *37*, 2901-2909.



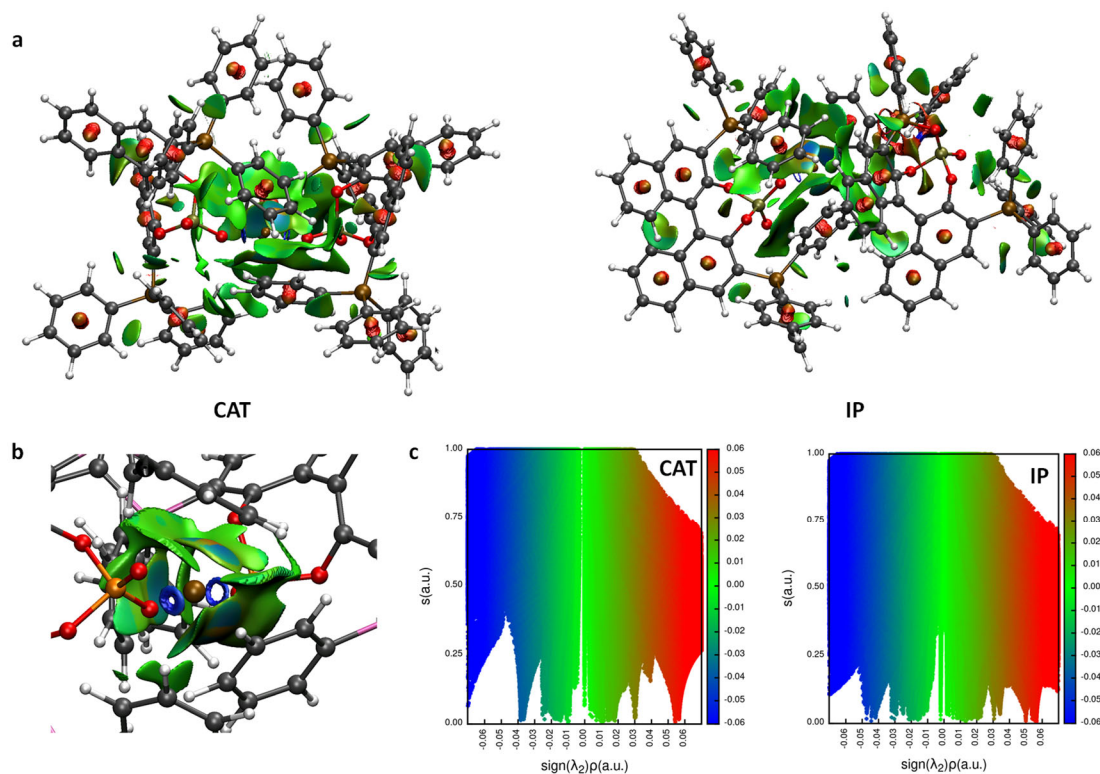

**Figure S 55.** **a:** NCI analyses for the catalyst as a complex (**CAT**) and as an ionic air (**IP**). **b:** Details of NCI interactions between the metal and the ligand. Thin, delocalized green surface indicates van der Waals interactions. Small, lenticular, bluish surfaces indicate strong interactions such as hydrogen bonding. Steric clashes are shown as red isosurfaces. **c:**  $s(\mathbf{r})$  against  $\text{sign}(\lambda_2)\rho(\mathbf{r})$  plots for **CAT** (left) and **IP** (right). Green area corresponds to weak van der Waals interactions. Blue area corresponds to strong interactions and red area corresponds to repulsive forces.

It is plausible to hypothesize the formation of an ionic pair and further coordination of the alcohol to the magnesium atom thus leading to model **B** and liberating one unit of phosphoric acid, with a cost (in the case of MeOH) of ca. 15 kcal/mol.

## Unsubstituted Model

Preliminary studies were carried out with an unsubstituted model **EC1** (Scheme S 14). These studies suggested the non-existence of an intermediate **IN** but a reaction in one kinetic step presenting a transient carbocation. Considering the whole reaction (bromination followed by rearrangement) there are two possible approaches for the formation of the epoxide and four ones for the formation of cyclopentanone. Taking into account that coordination with magnesium should be maintained, two approaches should be ruled out (Scheme S 14). In consequence, there are one approach (**TSa**) for obtaining the epoxide and four approaches (**TSb-d**) leading to the enantiomers of the cyclopentanone. The absence of cyclobutane substituents in this model makes that

rearrangement of bonds C2-C3 and C2-C5 are equivalent leading to enantiomeric compounds.

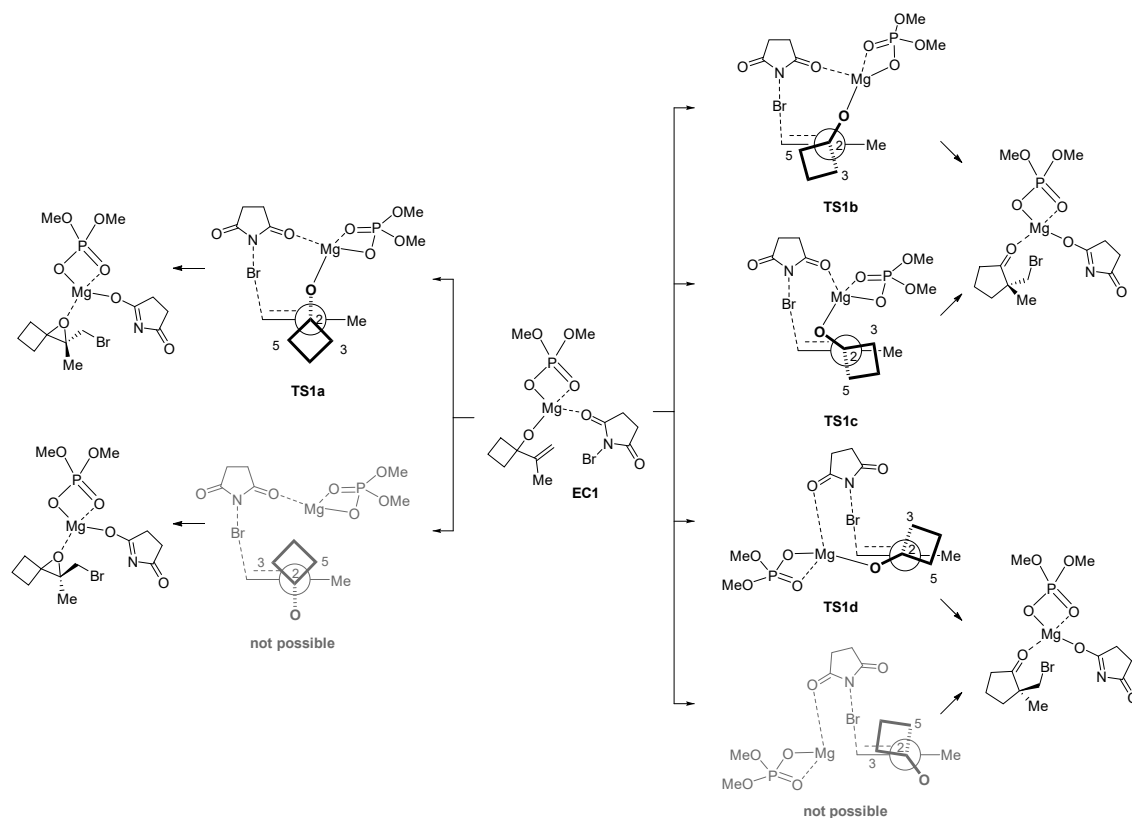

**Scheme S 13.** Approaches (PES) for the unsubstituted model EC1

The four transition structures as well as the starting minimum (EC1) and final products (EP1 and CY1) were located. The optimized geometries are given in Figure S 56 and Figure S 57, respectively.

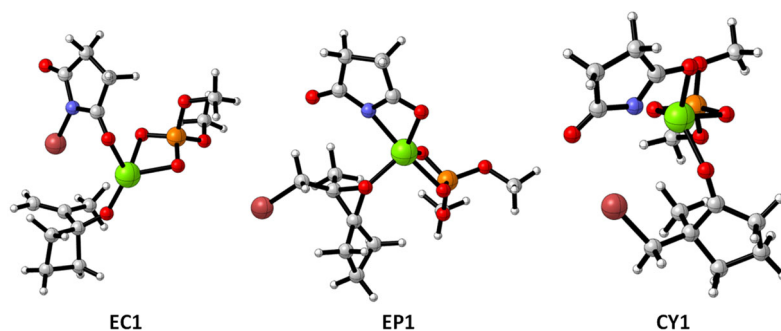

**Figure S 56.** Optimized (wb97xd/def2SVP) geometries of encounter complex EC1, epoxide EP1 and cyclopentanone CY1.

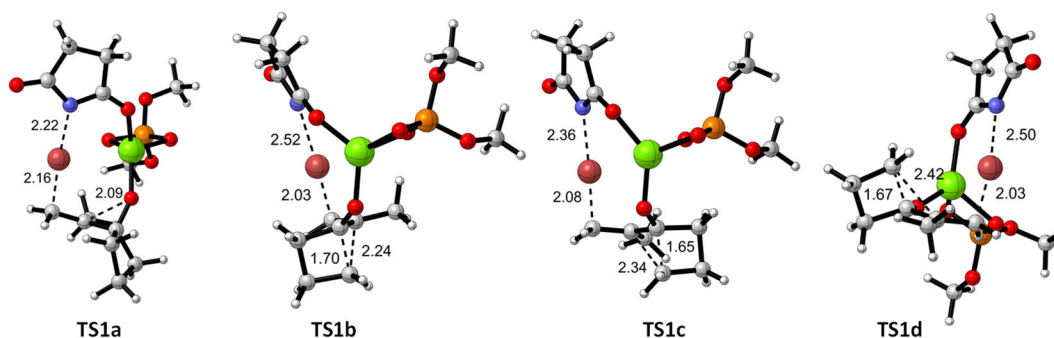

**Figure S 57.** Optimized (wb97xd/def2SVP) geometries of transition structures **TS1a**, **TS1b**, **TS1c** and **TS1d**.

The IRC analyses confirming that transition structures connect reagent and products are given in Figure S 58. Interestingly, the IRCs corresponding to **TS1b** and **TS1d** showed a clear shoulder typical of a “hidden intermediate”.

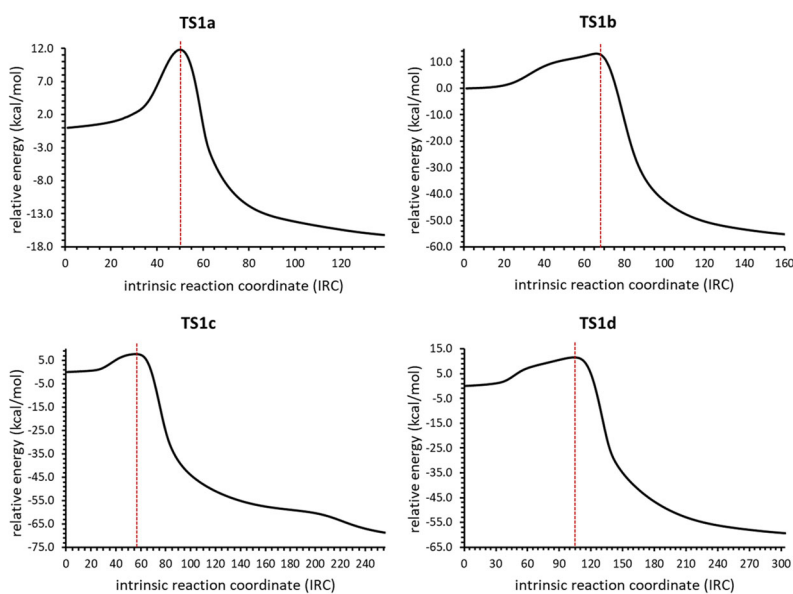

**Figure S 58.** IRCs (wb97xd/def2svp) corresponding to transition structures **TS1a**, **TS1b**, **TS1c** and **TS1d**. The red dotted line indicates the transition state.

Energy profiles are given in Figure S 59. Absolute and relative energies are listed in Table S 100.

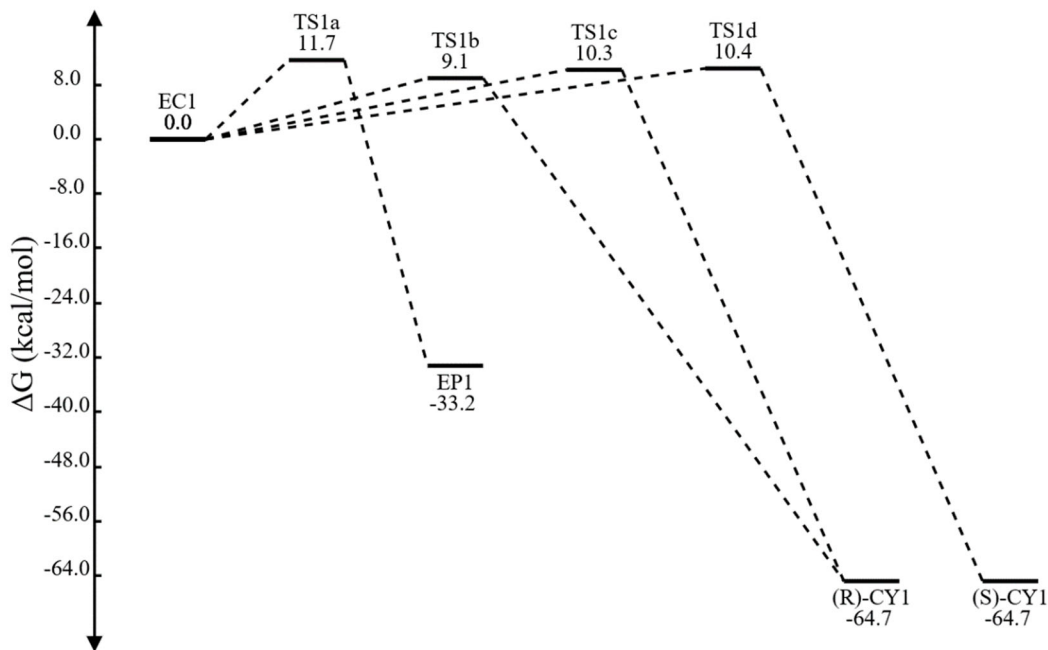

**Figure S 59.** Energy profiles (wb97xd/def2tzvp/pcm=toluene)//wb97xd/def2svp) for the different pathways from **EC1** to **EP1** and **CY1**. Relative free energies are given in kcal/mol.

**Table S 10.** Calculated (wb97xd/def2tzvp/pcm=toluene)//wb97xd/def2svp) absolute (hartree) and relative (kcal/mol) energies for the transformation of **EC1** into **EP1** and **CY1**.

|             | $E_0$        | $\Delta E_0$ | G            | $\Delta G$ | im. freq |
|-------------|--------------|--------------|--------------|------------|----------|
| <b>EC1</b>  | -4204.993364 | 0.0          | -4205.074060 | 0.0        |          |
| <b>TS1a</b> | -4204.974328 | 11.9         | -4205.055441 | 11.7       | -227.6   |
| <b>TS1b</b> | -4204.978509 | 9.3          | -4205.059523 | 9.1        | -285.9   |
| <b>TS1c</b> | -4204.977618 | 9.9          | -4205.057617 | 10.3       | -132.3   |
| <b>TS1d</b> | -4204.976291 | 10.7         | -4205.057505 | 10.4       | -125.8   |
| <b>CY1</b>  | -4205.094731 | -63.6        | -4205.177200 | -64.7      |          |
| <b>EP1</b>  | -4205.044295 | -32.0        | -4205.127047 | -33.2      |          |

An exploration of the potential energy surface (PES) corresponding to the second part of the reaction, i.e. formation of either the O1-C1 bond (epoxide) or C2-C3 bond (cyclopentanone) was made by carrying out relaxed scans at the different O1-C1 and C2-C3 distances. The exploration covered sampling of conformations and in all cases the most stable conformers have been considered. The resulting PES (Figure S 61) confirmed two different transition structures for the epoxide and cyclopentanone formation and the absence of a reasonable connection between the two products, in agreement with the experimental observations.

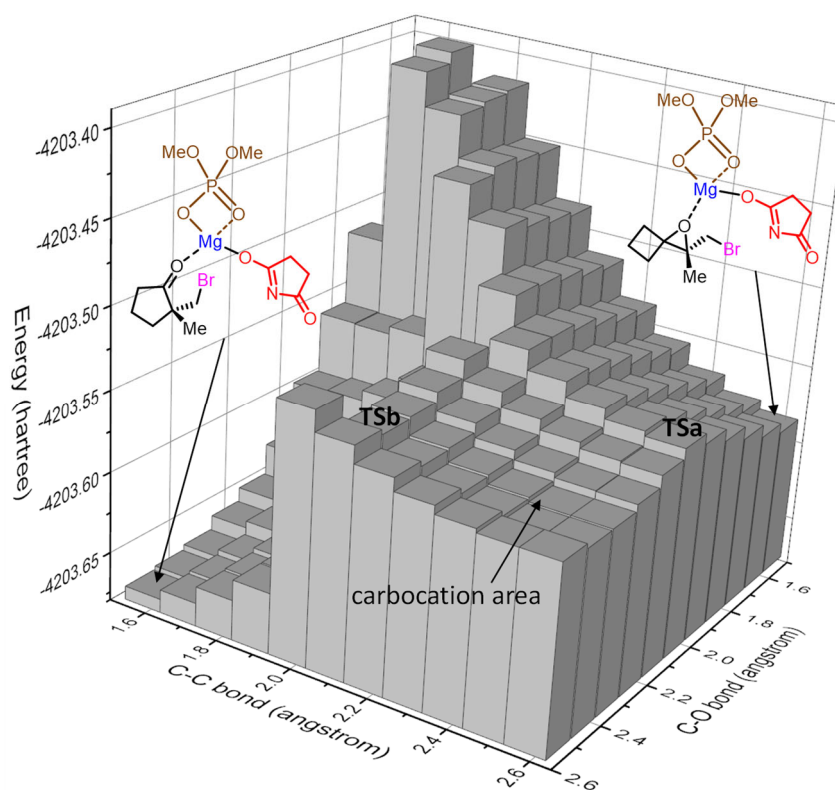

**Figure S 60.** Potential energy surface (wb97xd/def2svp) related to the formation of O1-C1 and C2-C3 bonds corresponding to the epoxide and the cyclopentanone, respectively.

### Benchmarking

Three additional levels of theory were calculated confirming that the employed level is the closest to experimental results even though all the levels showed the same trend.

**Table S 11.** Calculated (m062x/cc-pvtz/pcm=toluene//m062x/cc-pvdz) absolute (hartree) and relative (kcal/mol) energies for the transformation of **EC1** into **EP1** and **CY1**.

|             | $E_0$        | $\Delta E_0$ | G            | $\Delta G$ | im. freq |
|-------------|--------------|--------------|--------------|------------|----------|
| <b>EC1</b>  | -4204.873013 | 0.0          | -4204.934009 | 0.0        |          |
| <b>TS1a</b> | -4204.849887 | 14.5         | -4204.911619 | 14.1       | -291.8   |
| <b>TS1b</b> | -4204.852338 | 13.0         | -4204.914097 | 12.5       | -317.3   |
| <b>TS1c</b> | -4204.853413 | 12.3         | -4204.913827 | 12.7       | -174.4   |
| <b>TS1d</b> | -4204.850983 | 13.8         | -4204.912320 | 13.6       | -144.3   |
| <b>CY1</b>  | -4204.969752 | -60.7        | -4205.031266 | -61.0      |          |
| <b>EP1</b>  | -4204.924108 | -32.1        | -4204.986001 | -32.6      |          |

**Table S 12.** Calculated (b3lyp-gd3bj/6-311G(d,p)//b3lyp-gd3bj/6-31G(d,p)) absolute (hartree) and relative (kcal/mol) energies for the transformation of **EC1** into **EP1** and **CY1**.

|             | $E_0$        | $\Delta E_0$ | G            | $\Delta G$ | im. freq |
|-------------|--------------|--------------|--------------|------------|----------|
| <b>EC1</b>  | -4205.215671 | 0.0          | -4205.276833 | 0.0        |          |
| <b>TS1a</b> | -4205.203256 | 7.8          | -4205.264809 | 7.5        | -153.1   |
| <b>TS1b</b> | -4205.200089 | 9.8          | -4205.262251 | 9.2        | -397.3   |
| <b>TS1c</b> | -4205.203085 | 7.9          | -4205.265291 | 7.2        | -238.8   |
| <b>TS1d</b> | -4205.199187 | 10.3         | -4205.261305 | 9.7        | -195.9   |
| <b>CY1</b>  | -4205.316731 | -63.4        | -4205.379780 | -64.6      |          |
| <b>EP1</b>  | -4205.257793 | -26.4        | -4205.320834 | -27.6      |          |

**Table S 13.** Calculated (m062x/6-311G(d,p)/pcm=toluene//m062x/6-311G(d,p)) absolute (hartree) and relative (kcal/mol) energies for the transformation of **EC1** into **EP1** and **CY1**.

|             | $E_0$        | $\Delta E_0$ | G            | $\Delta G$ | im. freq |
|-------------|--------------|--------------|--------------|------------|----------|
| <b>EC1</b>  | -4204.631744 | 0.0          | -4204.692064 | 0.0        |          |
| <b>TS1a</b> | -4204.608624 | 14.5         | -4204.668985 | 14.5       | -290.9   |
| <b>TS1b</b> | -4204.610684 | 13.2         | -4204.671587 | 12.8       | -397.8   |
| <b>TS1c</b> | -4204.613714 | 11.3         | -4204.673755 | 11.5       | -212.2   |
| <b>TS1d</b> | -4204.609753 | 13.8         | -4204.670650 | 13.4       | -164.1   |
| <b>CY1</b>  | -4204.740881 | -68.5        | -4204.802151 | -69.1      |          |
| <b>EP1</b>  | -4204.686138 | -34.1        | -4204.747661 | -34.9      |          |

## Real model with Achiral Catalyst

We studied the real model leading to desymmetrization with an achiral catalyst to evaluate the reactivity. Full studies were carried out with  $R = \text{Ph}$  and predictive studies with  $R = 4\text{-MeOC}_6\text{H}_4$  and  $R = 4\text{-F}_3\text{CC}_6\text{H}_4$ . In a similar way to the unsubstituted model, four approaches are possible. In this case, due to the presence of substituents in the cyclobutane ring, different isomeric cyclopentanones in addition to the epoxide can be obtained (Scheme S 14).

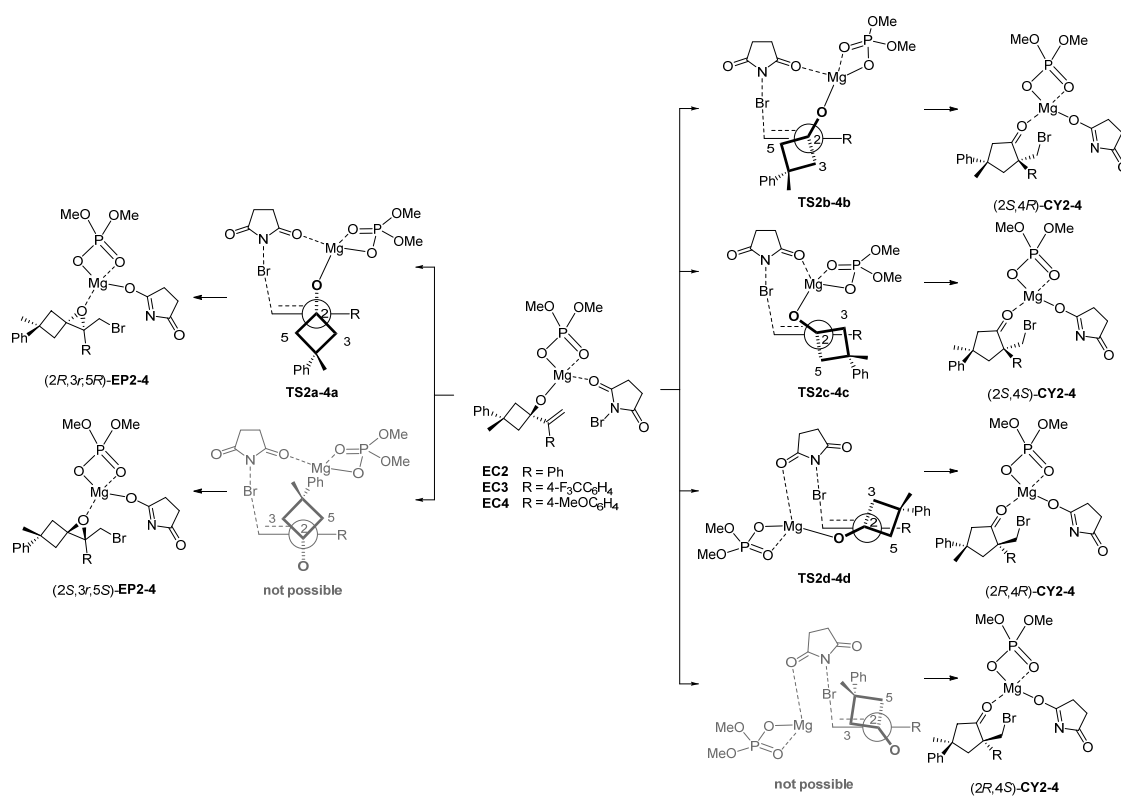

Scheme S 14. Approaches (PES) for the real models EC2-4

The preliminary analysis of the transition structures illustrated in Scheme S15 showed a clear competition between **TS2a** and **TS2b**, the only transition structures that show the aromatic ring planar with respect to C6-C7 bond, thus being able of contributing to the stabilization of a transient carbocation. Indeed, in both **TS2c** and **TS2d**, due to steric hindrance caused by the cyclobutane ring, the aromatic ring linked to C-6 is placed perpendicular to the double bond circumventing any conjugative effect.<sup>19</sup> Such a disposition facilitates  $\pi,\pi$ -interactions between the two aromatic rings linked to C4 and C6 (confirmed by NCI analysis, see below).

<sup>19</sup> This effect is also reflected in the IRCs of **TS1c** and **TS1d** that do not show the area corresponding to the transient carbocation, being more similar to that corresponding to **TS1a**.

Optimized geometries

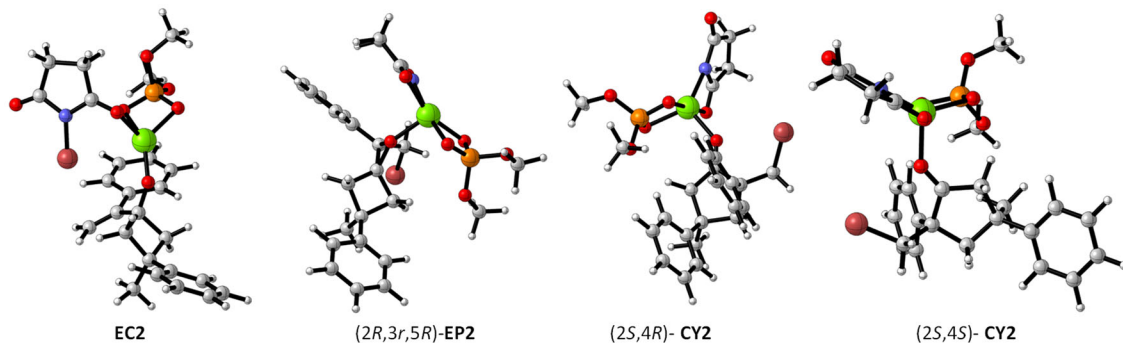

**Figure S 61.** Optimized (wb97xd/def2SVP) geometries of encounter complex EC2, epoxide (2R,3r,5R)-EP2 and cyclopentanones (2S,4R)-CY2, (2S,4S)-CY2 and (2R,4R)-CY2

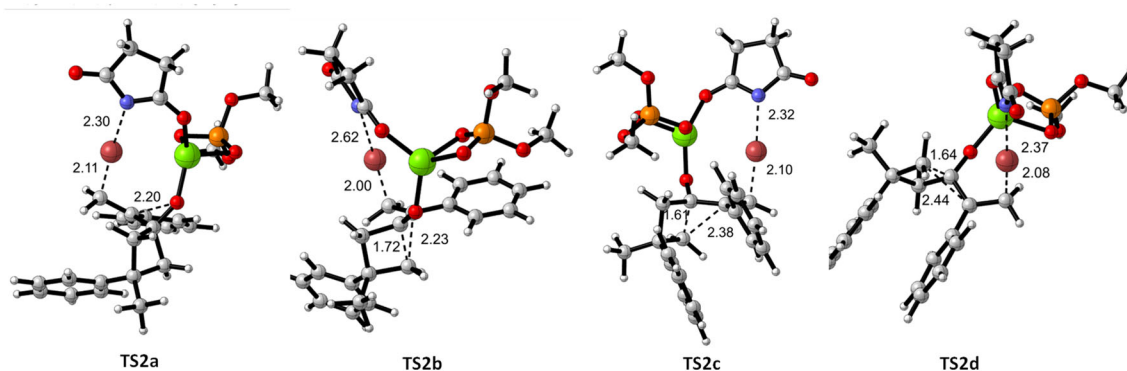

**Figure S 62.** Optimized (wb97xd/def2SVP) geometries of transition structures TS2a, TS2b, TS2c and TS2d.

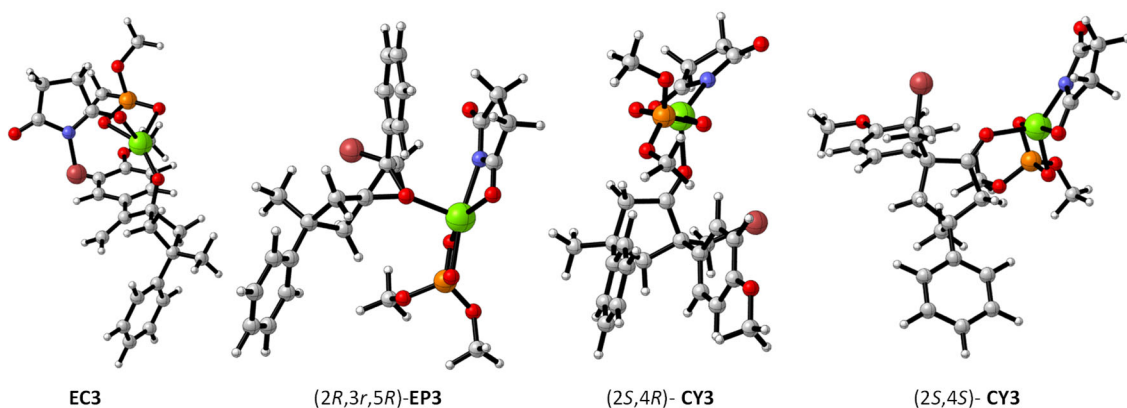

**Figure S 63.** Optimized (wb97xd/def2SVP) geometries of encounter complex EC3, epoxide (2R,3r,5R)-EP3 and cyclopentanones (2S,4R)-CY3, (2S,4S)-CY3 and (2R,4R)-CY3



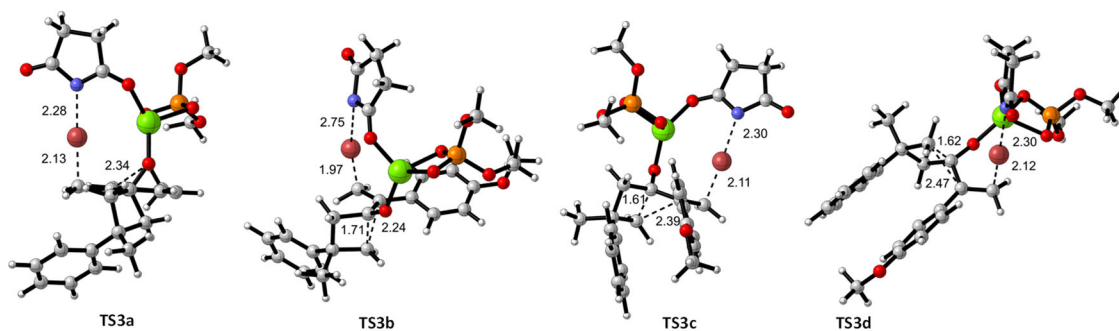

**Figure S 64.** Optimized (wb97xd/def2SVP) geometries of transition structures **TS3a**, **TS3b**, **TS3c** and **TS3d**.

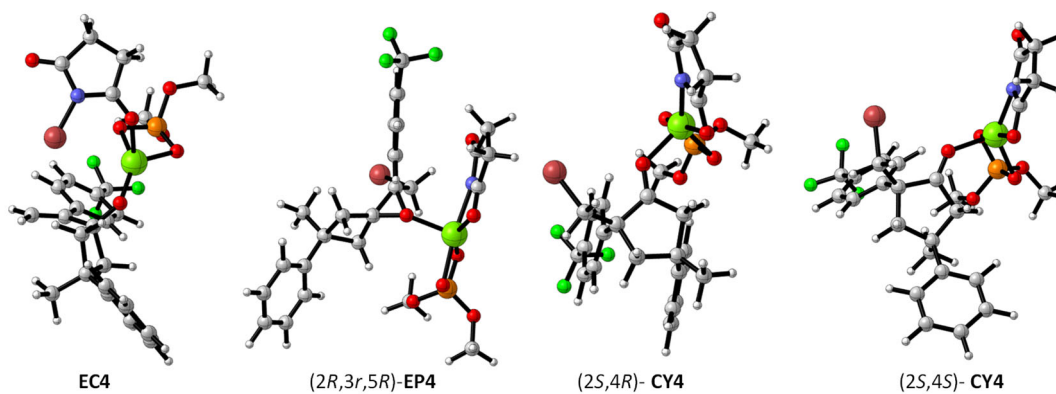

**Figure S 65.** Optimized (wb97xd/def2SVP) geometries of encounter complex **EC4**, epoxide **(2R,3r,5R)-EP4** and cyclopentanones **(2S,4R)-CY4**, **(2S,4S)-CY4** and **(2R,4R)-CY4**

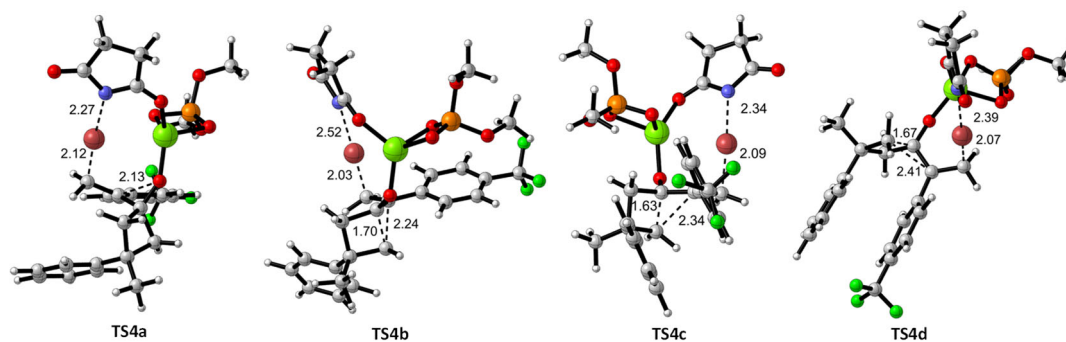

**Figure S 66.** Optimized (wb97xd/def2SVP) geometries of transition structures **TS4a**, **TS4b**, **TS4c** and **TS4d**.

### Intrinsic reaction coordinates

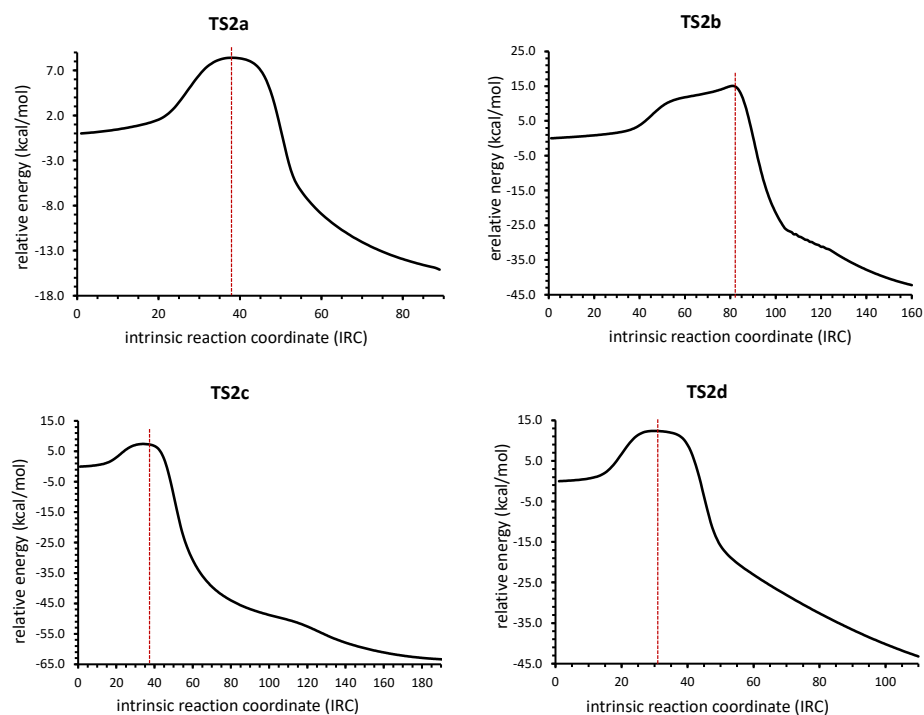

**Figure S 67.** IRCs (wb97xd/def2svp) corresponding to transition structures **TS2a**, **TS2b**, **TS2c** and **TS2d**. The red dashed line indicates the transition state.

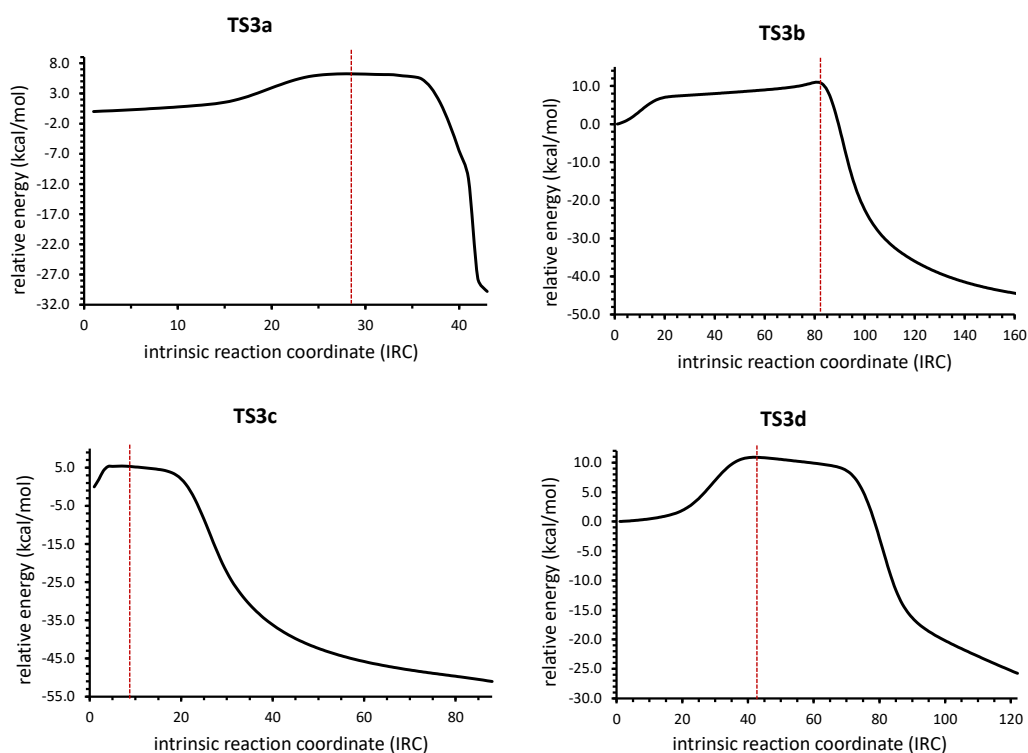

**Figure S 68.** IRCs (wb97xd/def2svp) corresponding to transition structures **TS3a**, **TS3b**, **TS3c** and **TS3d**. **TS3a** and **TS3c** were completed with relaxed scans after 10 points and before 8 points from the corresponding transition structure. The red dashed line indicates the transition state.

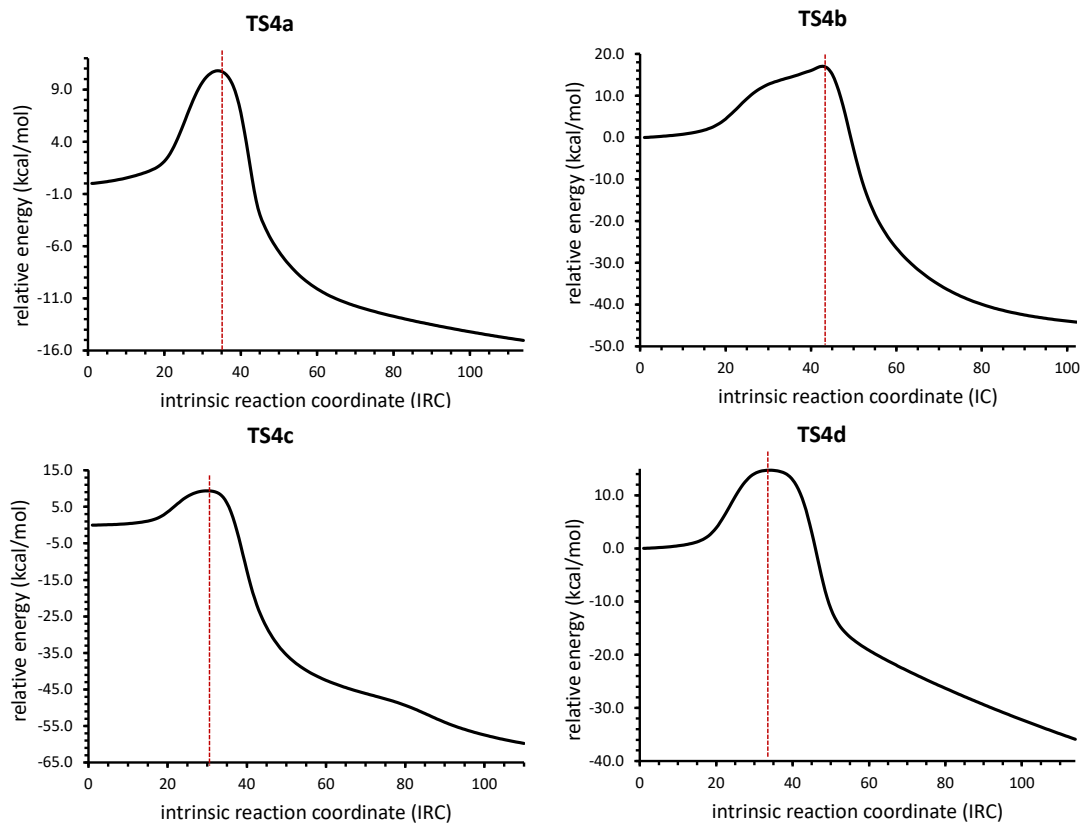

**Figure S 69.** IRCs (wb97xd/def2svp) corresponding to transition structures **TS4a**, **TS4b**, **TS4c** and **TS4d**. The red dashed line indicates the transition state.

## Energies

**Table S 14.** Calculated (wb97xd/def2tzvp/pcm=toluene//wb97xd/def2svp) absolute (hartree) and relative (kcal/mol) energies for the transformation of **EC2** into **EP2** and **CY2**.

|                       | $E_0$        | $\Delta E_0$ | G            | $\Delta G$ | im. freq |
|-----------------------|--------------|--------------|--------------|------------|----------|
| <b>EC2</b>            | -4666.936063 | 0.0          | -4667.033127 | 0.0        |          |
| <b>TS2a</b>           | -4666.921472 | 9.2          | -4667.016934 | 10.2       | -102.3   |
| <b>TS2b</b>           | -4666.920881 | 9.5          | -4667.018248 | 9.3        | -283.1   |
| <b>TS2c</b>           | -4666.922829 | 8.3          | -4667.016694 | 10.3       | -100.1   |
| <b>TS2d</b>           | -4666.914449 | 13.6         | -4667.011436 | 13.6       | -75.2    |
| <b>(2R,4S)-CY2</b>    | -4667.035617 | -62.5        | -4667.136666 | -65.0      |          |
| <b>(2S,4S)-CY2</b>    | -4667.034869 | -62.0        | -4667.134881 | -63.9      |          |
| <b>(2R,3r,5R)-EP2</b> | -4666.987781 | -32.5        | -4667.084815 | -32.4      |          |

**Table S 15.** Calculated (wb97xd/def2tzvp/pcm=toluene//wb97xd/def2svp) absolute (hartree) and relative (kcal/mol) energies for the transformation of **EC3** into **EP3** and **CY3**.

|                       | $E_0$        | $\Delta E_0$ | G            | $\Delta G$ | im. freq |
|-----------------------|--------------|--------------|--------------|------------|----------|
| <b>EC3</b>            | -4781.441079 | 0.0          | -4781.540049 | 0.0        |          |
| <b>TS3a</b>           | -4781.431976 | 5.7          | -4781.532648 | 4.6        | -83.9    |
| <b>TS3b</b>           | -4781.430028 | 6.9          | -4781.532229 | 4.9        | -242.3   |
| <b>TS3c</b>           | -4781.428921 | 7.6          | -4781.526756 | 8.3        | -87.1    |
| <b>TS3d</b>           | -4781.420430 | 13.0         | -4781.521707 | 11.5       | -105.4   |
| <b>(2R,4S)-CY3</b>    | -4781.538483 | -61.1        | -4781.642939 | -64.6      |          |
| <b>(2S,4S)-CY3</b>    | -4781.537674 | -60.6        | -4781.642778 | -64.5      |          |
| <b>(2R,3r,5R)-EP3</b> | -4781.488421 | -29.7        | -4781.589374 | -31.0      |          |

**Table S 16.** Calculated (wb97xd/def2tzvp/pcm=toluene//wb97xd/def2svp) absolute (hartree) and relative (kcal/mol) energies for the transformation of **EC4** into **EP4** and **CY4**.

|                       | $E_0$        | $\Delta E_0$ | G            | $\Delta G$ | im. freq |
|-----------------------|--------------|--------------|--------------|------------|----------|
| <b>EC4</b>            | -5004.038543 | 0.0          | -5004.142061 | 0.0        |          |
| <b>TS4a</b>           | -5004.019872 | 11.7         | -5004.122592 | 12.2       | -169.8   |
| <b>TS4b</b>           | -5004.023355 | 9.5          | -5004.125136 | 10.6       | -248.5   |
| <b>TS4c</b>           | -5004.018319 | 12.7         | -5004.122248 | 12.4       | -120.7   |
| <b>TS4d</b>           | -5004.014970 | 14.8         | -5004.119556 | 14.1       | -95.3    |
| <b>(2R,4S)-CY4</b>    | -5004.137163 | -61.9        | -5004.241073 | -62.1      |          |
| <b>(2S,4S)-CY4</b>    | -5004.135087 | -60.6        | -5004.243853 | -63.9      |          |
| <b>(2R,3r,5R)-EP4</b> | -5004.088621 | -31.4        | -5004.195912 | -33.8      |          |

## Benchmarking

Three additional levels of theory were calculated confirming that the employed level is the closest to experimental results even though all the levels showed the same trend.

Level: m062x/cc-pvtz/pcm=toluene//m062x/cc-pvdz

**Table S17.** Calculated (m062x/cc-pvtz/pcm=toluene//m062x/cc-pvdz) absolute (hartree) and relative (kcal/mol) energies for the transformation of **EC2** into **EP2** and **CY2** .

|                                                   | E <sub>0</sub> | ΔE <sub>0</sub> | G            | ΔG    | im. freq |
|---------------------------------------------------|----------------|-----------------|--------------|-------|----------|
| <b>EC2</b>                                        | -4666.784591   | 0.0             | -4666.856119 | 0.0   |          |
| <b>TS2a</b>                                       | -4666.764352   | 12.7            | -4666.835733 | 12.8  | -134.0   |
| <b>TS2b</b>                                       | -4666.761792   | 14.3            | -4666.834845 | 13.3  | -275.1   |
| <b>TS2c</b>                                       | -4666.766677   | 11.2            | -4666.836856 | 12.1  | -139.9   |
| <b>TS2d</b>                                       | -4666.758944   | 16.1            | -4666.830760 | 15.9  | -122.8   |
| (2 <i>R</i> ,4 <i>S</i> )- <b>CY2</b>             | -4666.877483   | -58.3           | -4666.949556 | -58.6 |          |
| (2 <i>S</i> ,4 <i>S</i> )- <b>CY2</b>             | -4666.876534   | -57.7           | -4666.952043 | -60.2 |          |
| (2 <i>R</i> ,3 <i>r</i> ,5 <i>R</i> )- <b>EP2</b> | -4666.834672   | -31.4           | -4666.907688 | -32.4 |          |

**Table S18.** Calculated (m062x/cc-pvtz/pcm=toluene//m062x/cc-pvdz) absolute (hartree) and relative (kcal/mol) energies for the transformation of **EC3** into **EP3** and **CY3** .

|                                                   | E <sub>0</sub> | ΔE <sub>0</sub> | G            | ΔG    | im. freq |
|---------------------------------------------------|----------------|-----------------|--------------|-------|----------|
| <b>EC3</b>                                        | -4781.280628   | 0.0             | -4781.353412 | 0.0   |          |
| <b>TS3a</b>                                       | -4781.262342   | 11.5            | -4781.336933 | 10.3  | -80.4    |
| <b>TS3b</b>                                       | -4781.259134   | 13.5            | -4781.334920 | 11.6  | -201.3   |
| <b>TS3c</b>                                       | -4781.261625   | 11.9            | -4781.334345 | 12.0  | -97.4    |
| <b>TS3d</b>                                       | -4781.254139   | 16.6            | -4781.328562 | 15.6  | -110.2   |
| (2 <i>R</i> ,4 <i>S</i> )- <b>CY3</b>             | -4781.369477   | -55.8           | -4781.444827 | -57.4 |          |
| (2 <i>S</i> ,4 <i>S</i> )- <b>CY3</b>             | -4781.367670   | -54.6           | -4781.446764 | -58.6 |          |
| (2 <i>R</i> ,3 <i>r</i> ,5 <i>R</i> )- <b>EP3</b> | -4781.325350   | -28.1           | -4781.399192 | -28.7 |          |

**Table S19.** Calculated (m062x/cc-pvtz/pcm=toluene//m062x/cc-pvdz) absolute (hartree) and relative (kcal/mol) energies for the transformation of **EC4** into **EP4** and **CY4** .

|                                                   | E <sub>0</sub> | ΔE <sub>0</sub> | G            | ΔG    | im. freq |
|---------------------------------------------------|----------------|-----------------|--------------|-------|----------|
| <b>EC4</b>                                        | -5003.865918   | 0.0             | -5003.941723 | 0.0   |          |
| <b>TS4a</b>                                       | -5003.841662   | 15.2            | -5003.919115 | 14.2  | -239.9   |
| <b>TS4b</b>                                       | -5003.839519   | 16.6            | -5003.916449 | 15.9  | -305.2   |
| <b>TS4c</b>                                       | -5003.845453   | 12.8            | -5003.920524 | 13.3  | -182.4   |
| <b>TS4d</b>                                       | -5003.837628   | 17.8            | -5003.914686 | 17.0  | -165.8   |
| (2 <i>R</i> ,4 <i>S</i> )- <b>CY4</b>             | -5003.957344   | -57.4           | -5004.034098 | -58.0 |          |
| (2 <i>S</i> ,4 <i>S</i> )- <b>CY4</b>             | -5003.954124   | -55.4           | -5004.034015 | -57.9 |          |
| (2 <i>R</i> ,3 <i>r</i> ,5 <i>R</i> )- <b>EP4</b> | -5003.913108   | -29.6           | -5003.991683 | -31.3 |          |

Level: b3lyp-gd3bj/6-311G(d,p)/pcm=toluene//b3lyp-gd3bj/6-31G(d,p)

**Table S20.** Calculated (b3lyp-gd3bj/6-311G(d,p)/pcm=toluene//b3lyp-gd3bj/6-31G(d,p)) absolute (hartree) and relative (kcal/mol) energies for the transformation of **EC2** into **EP2** and **CY2** .

|                                                   | $E_0$        | $\Delta E_0$ | G            | $\Delta G$ | im. freq |
|---------------------------------------------------|--------------|--------------|--------------|------------|----------|
| <b>EC2</b>                                        | -4667.321862 | 0.0          | -4667.395918 | 0.0        |          |
| <b>TS2a</b>                                       | -4667.314886 | 4.4          | -4667.386725 | 5.8        | -69.0    |
| <b>TS2b</b>                                       | -4667.304656 | 10.8         | -4667.378087 | 11.2       | -360.5   |
| <b>TS2c</b>                                       | -4667.314552 | 4.6          | -4667.386559 | 5.9        | -176.6   |
| <b>TS2d</b>                                       | -4667.304663 | 10.8         | -4667.378478 | 10.9       | -86.5    |
| (2 <i>R</i> ,4 <i>S</i> )- <b>CY2</b>             | -4667.410997 | -55.9        | -4667.481286 | -53.6      |          |
| (2 <i>S</i> ,4 <i>S</i> )- <b>CY2</b>             | -4667.410058 | -55.3        | -4667.483185 | -54.8      |          |
| (2 <i>R</i> ,3 <i>r</i> ,5 <i>R</i> )- <b>EP2</b> | -4667.362652 | -25.6        | -4667.433919 | -23.8      |          |

**Table S21.** Calculated (b3lyp-gd3bj/6-311G(d,p)/pcm=toluene//b3lyp-gd3bj/6-31G(d,p)) absolute (hartree) and relative (kcal/mol) energies for the transformation of **EC3** into **EP3** and **CY3** .

|                                                   | $E_0$        | $\Delta E_0$ | G            | $\Delta G$ | im. freq |
|---------------------------------------------------|--------------|--------------|--------------|------------|----------|
| <b>EC3</b>                                        | -4781.856839 | 0.0          | -4781.932046 | 0.0        |          |
| <b>TS3a</b>                                       | -4781.848255 | 5.4          | -4781.923722 | 5.2        | -61.5    |
| <b>TS3b</b>                                       | -4781.838406 | 11.6         | -4781.914980 | 10.7       | -361.4   |
| <b>TS3c</b>                                       | -4781.846994 | 6.2          | -4781.922013 | 6.3        | -145.7   |
| <b>TS3d</b>                                       | -4781.837596 | 12.1         | -4781.913495 | 11.6       | -32.0    |
| (2 <i>R</i> ,4 <i>S</i> )- <b>CY3</b>             | -4781.939974 | -52.2        | -4782.017185 | -53.4      |          |
| (2 <i>S</i> ,4 <i>S</i> )- <b>CY3</b>             | -4781.937686 | -50.7        | -4782.017172 | -53.4      |          |
| (2 <i>R</i> ,3 <i>r</i> ,5 <i>R</i> )- <b>EP3</b> | -4781.892203 | -22.2        | -4781.969625 | -23.6      |          |

**Table S22.** Calculated (b3lyp-gd3bj/6-311G(d,p)/pcm=toluene//b3lyp-gd3bj/6-31G(d,p)) absolute (hartree) and relative (kcal/mol) energies for the transformation of **EC4** into **EP4** and **CY4** .

|                                                   | $E_0$        | $\Delta E_0$ | G            | $\Delta G$ | im. freq |
|---------------------------------------------------|--------------|--------------|--------------|------------|----------|
| <b>EC4</b>                                        | -5004.466015 | 0.0          | -5004.541690 | 0.0        |          |
| <b>TS4a</b>                                       | -5004.455464 | 6.6          | -5004.533307 | 5.3        | -96.8    |
| <b>TS4b</b>                                       | -5004.446336 | 12.3         | -5004.524423 | 10.8       | -371.6   |
| <b>TS4c</b>                                       | -5004.456418 | 6.0          | -5004.534177 | 4.7        | -210.1   |
| <b>TS4d</b>                                       | -5004.446274 | 12.4         | -5004.524916 | 10.5       | -132.6   |
| (2 <i>R</i> ,4 <i>S</i> )- <b>CY4</b>             | -5004.558047 | -57.8        | -5004.633597 | -57.7      |          |
| (2 <i>S</i> ,4 <i>S</i> )- <b>CY4</b>             | -5004.551154 | -53.4        | -5004.636098 | -59.2      |          |
| (2 <i>R</i> ,3 <i>r</i> ,5 <i>R</i> )- <b>EP4</b> | -5004.504154 | -23.9        | -5004.581095 | -24.7      |          |

Level: m062x/6-311G(d,p)/pcm=toluene//m062x/6-31G(d,p)

**Table S23.** Calculated (b3lyp-gd3bj/6-311G(d,p)/pcm=toluene//b3lyp-gd3bj/6-31G(d,p)) absolute (hartree) and relative (kcal/mol) energies for the transformation of **EC2** into **EP2** and **CY2** .

|                       | $E_0$        | $\Delta E_0$ | G            | $\Delta G$ | im. freq |
|-----------------------|--------------|--------------|--------------|------------|----------|
| <b>EC2</b>            | -4666.497339 | 0.0          | -4666.568052 | 0.0        |          |
| <b>TS2a</b>           | -4666.477716 | 12.3         | -4666.547818 | 12.7       | -138.9   |
| <b>TS2b</b>           | -4666.472620 | 15.5         | -4666.544921 | 14.5       | -350.1   |
| <b>TS2c</b>           | -4666.481340 | 10.0         | -4666.551009 | 10.7       | -167.1   |
| <b>TS2d</b>           | -4666.471062 | 16.5         | -4666.541926 | 16.4       | -114.0   |
| <b>(2R,4S)-CY2</b>    | -4666.590419 | -58.4        | -4666.661658 | -58.7      |          |
| <b>(2S,4S)-CY2</b>    | -4666.591922 | -59.4        | -4666.668223 | -62.9      |          |
| <b>(2R,3r,5R)-EP2</b> | -4666.550061 | -33.1        | -4666.621864 | -33.8      |          |

**Table S24.** Calculated (b3lyp-gd3bj/6-311G(d,p)/pcm=toluene//b3lyp-gd3bj/6-31G(d,p)) absolute (hartree) and relative (kcal/mol) energies for the transformation of **EC3** into **EP3** and **CY3** .

|                       | $E_0$        | $\Delta E_0$ | G            | $\Delta G$ | im. freq |
|-----------------------|--------------|--------------|--------------|------------|----------|
| <b>EC3</b>            | -4780.981389 | 0.0          | -4781.053642 | 0.0        |          |
| <b>TS3a</b>           | -4780.961835 | 12.3         | -4781.035558 | 11.3       | -36.2    |
| <b>TS3b</b>           | -4780.956007 | 15.9         | -4781.031087 | 14.2       | -294.6   |
| <b>TS3c</b>           | -4780.962852 | 11.6         | -4781.035513 | 11.4       | -109.5   |
| <b>TS3d</b>           | -4780.952437 | 18.2         | -4781.025796 | 17.5       | -90.9    |
| <b>(2R,4S)-CY3</b>    | -4781.069651 | -55.4        | -4781.147045 | -58.6      |          |
| <b>(2S,4S)-CY3</b>    | -4781.069510 | -55.3        | -4781.149609 | -60.2      |          |
| <b>(2R,3r,5R)-EP3</b> | -4781.028720 | -29.7        | -4781.102358 | -30.6      |          |

**Table S25.** Calculated (b3lyp-gd3bj/6-311G(d,p)/pcm=toluene//b3lyp-gd3bj/6-31G(d,p)) absolute (hartree) and relative (kcal/mol) energies for the transformation of **EC4** into **EP4** and **CY4** .

|                       | $E_0$        | $\Delta E_0$ | G            | $\Delta G$ | im. freq |
|-----------------------|--------------|--------------|--------------|------------|----------|
| <b>EC4</b>            | -5003.539595 | 0.0          | -5003.614225 | 0.0        |          |
| <b>TS4a</b>           | -5003.516186 | 14.7         | -5003.591986 | 14.0       | -227.6   |
| <b>TS4b</b>           | -5003.511986 | 17.3         | -5003.588616 | 16.1       | -373.4   |
| <b>TS4c</b>           | -5003.521491 | 11.4         | -5003.596650 | 11.0       | -217.0   |
| <b>TS4d</b>           | -5003.511104 | 17.9         | -5003.586946 | 17.1       | -156.3   |
| <b>(2R,4S)-CY4</b>    | -5003.636309 | -60.7        | -5003.712570 | -61.7      |          |
| <b>(2S,4S)-CY4</b>    | -5003.630685 | -57.2        | -5003.711377 | -61.0      |          |
| <b>(2R,3r,5R)-EP4</b> | -5003.589377 | -31.2        | -5003.666989 | -33.1      |          |

### Energy profiles

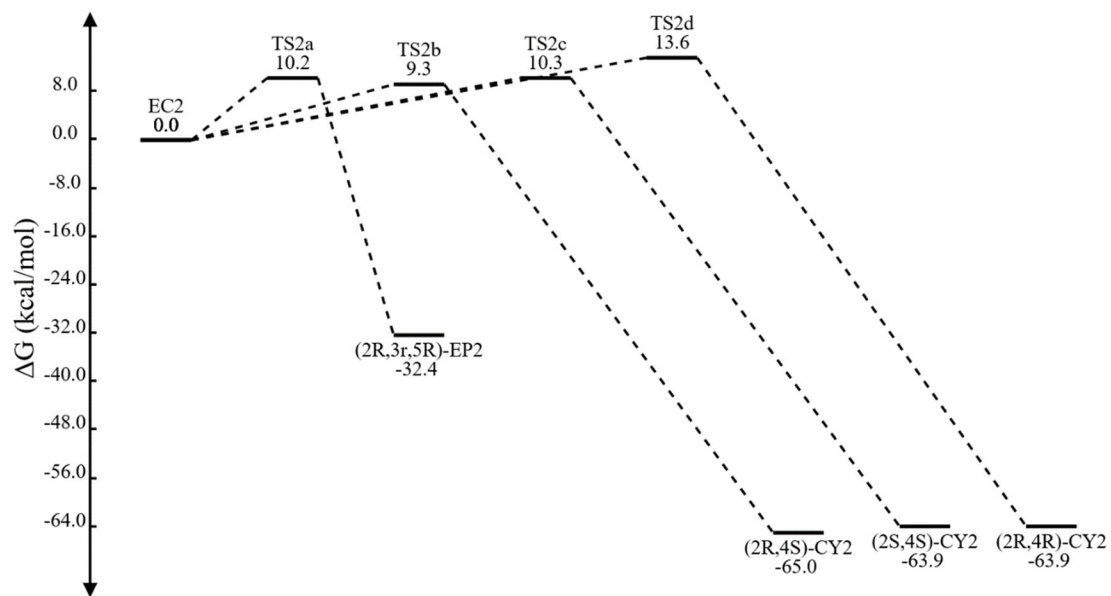

**Figure S 70.** Energy profiles (wb97xd/def2tzvp/pcm=toluene)//wb97xd/def2svp) for the different pathways from EC2 to EP2 and CY2. Relative free energies are given in kcal/mol.

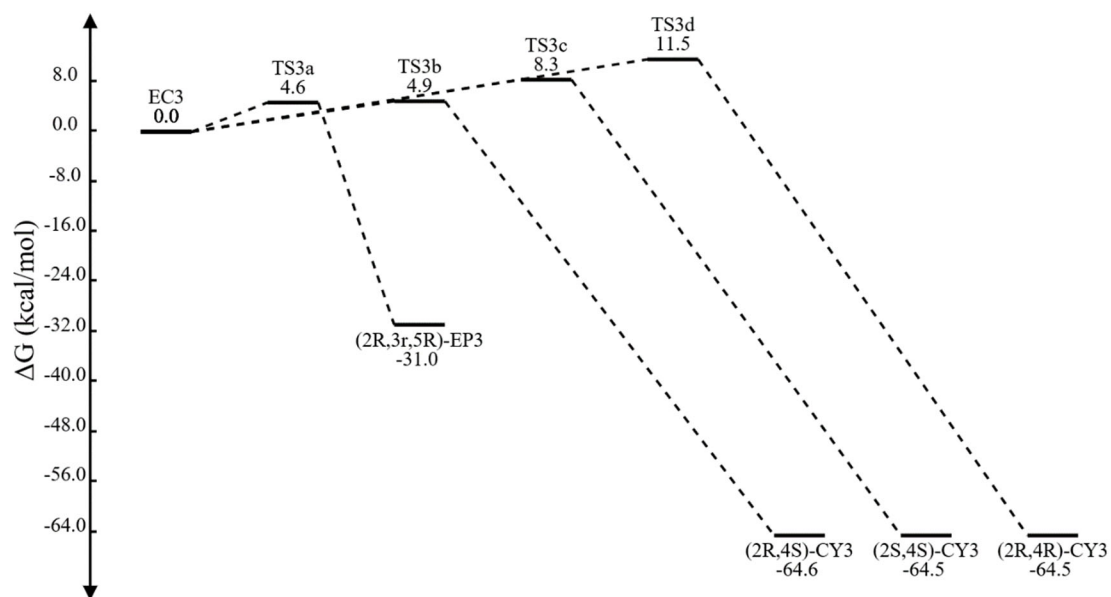

**Figure S 71.** Energy profiles (wb97xd/def2tzvp/pcm=toluene)//wb97xd/def2svp) for the different pathways from EC3 to EP3 and CY3. Relative free energies are given in kcal/mol.



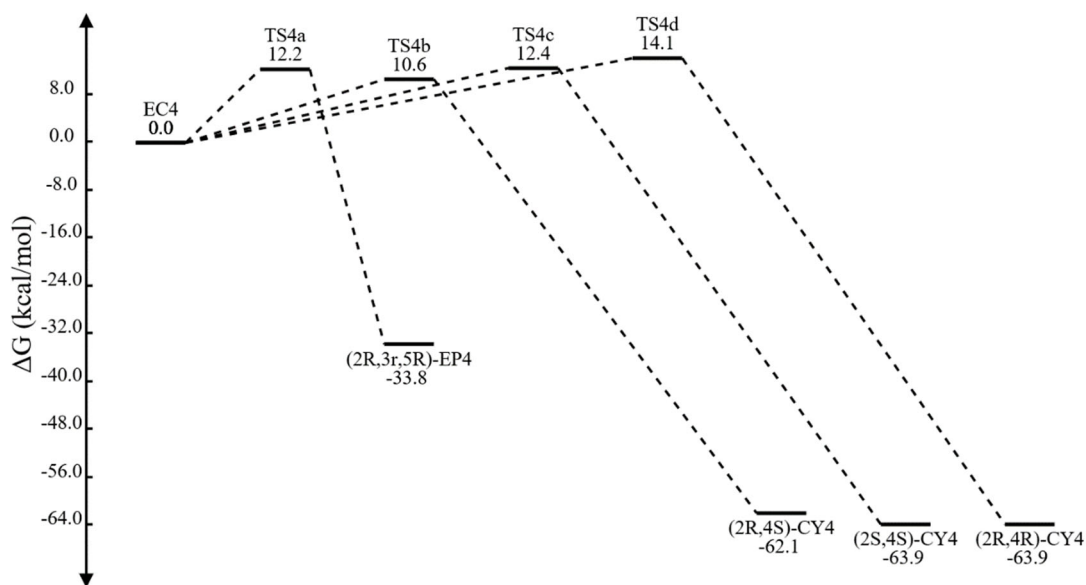

**Figure S 72.** Energy profiles (wb97xd/def2tzvp/pcm=toluene)//wb97xd/def2svp) for the different pathways from EC4 to EP4 and CY4. Relative free energies are given in kcal/mol.

A further exploration of the potential energy surface (PES) for the reaction of EP3 (R = MeOC<sub>6</sub>H<sub>4</sub>) corresponding to the first part of the reaction, i.e. variation of the dihedral angle with respect to the IRC (Figure S 73, left), evidenced the planarity of the surface as it corresponds to the small difference between the two dihedral angles leading to epoxide and cyclopentanone.

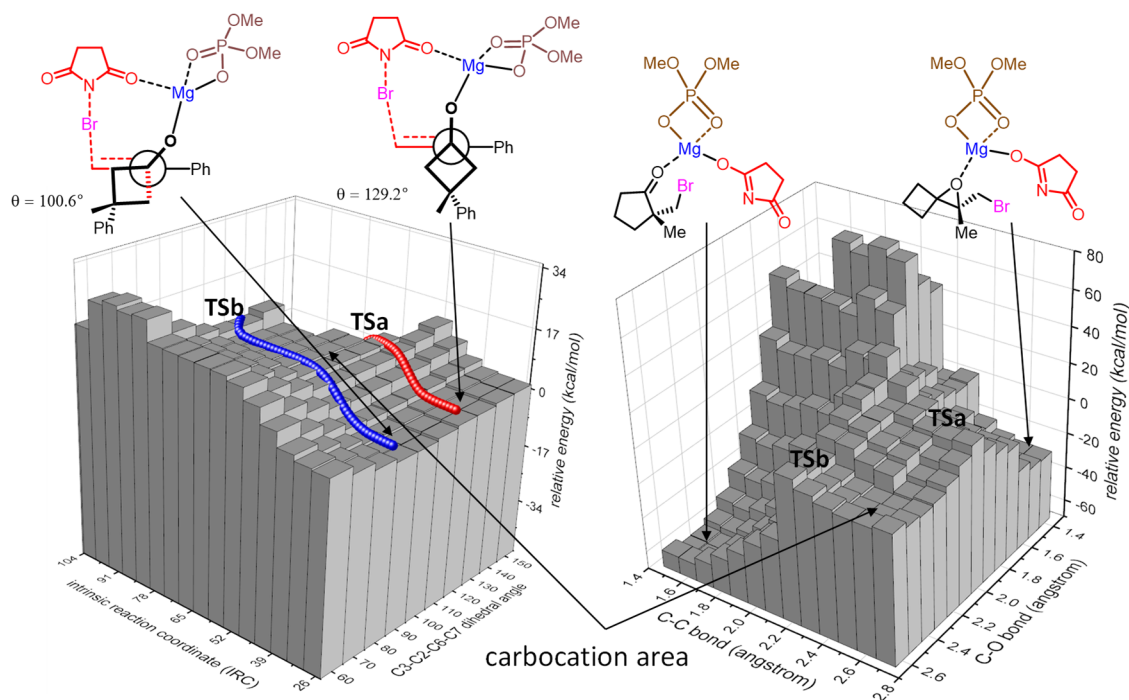

**Figure S 73.** Left: Potential energy surface (wb97xd/def2svp) related to the variation of the dihedral angle with respect to the IRC (red: IRC for the formation of the epoxide; blue: IRC for the formation of the cyclopentanone). Right: Potential energy surface (wb97xd/def2svp) corresponding to the formation of O1-C1 and C2-C3 bonds leading to the epoxide and the cyclopentanone, respectively.

The exploration of the second part of the reaction, i.e. formation of either the O1-C1 bond (epoxide) or C2-C3 bond (cyclopentanone) (Figure S 73, right), was made in a similar way to the unsubstituted model; similar results were obtained confirming the absence of a direct connection between the epoxide and the cyclopentanone. For the PES exploration the most stable conformers were considered.

### *NCI Analysis*

Non-covalent interactions are shown as isosurfaces in Figure S 74, Figure S 75 and Figure S 76. Thin, delocalized green surfaces indicate van der Waals interactions such as extended surfaces between aromatic rings illustrating  $\pi$ - $\pi$  interactions. Small, lenticular, bluish surfaces indicate strong interactions such as hydrogen bonding. Steric clashes are shown as red isosurfaces. Forming bonds are indicated by a blue disc surrounded by a red area.  $s(\mathbf{r})$  against  $sign(\lambda_2)\rho(\mathbf{r})$  plots are also given in the bottom part. Quantitative analysis is given in Table S 26, Table S 27 and Table S 28. Blue area corresponds to strong NCI (H-bond, halogen, etc.); green area corresponds to van der Waals interactions and red area corresponds to repulsive interactions (steric clashes, etc.)

In all cases, the C-Br bond is essentially done at the transition structure but, interestingly, a strong interaction (disc blue) exists between the nitrogen and the bromine atoms indicating that the process, as a whole, has not finished, yet. This interaction demonstrates that, independently of the advance in the forming bonds like C-Br, all the process consist of a single kinetic step.

Transition structures **a** and **b**, place the aromatic ring planar with respect to the  $sp^2$  carbon developing a positive charge. In those cases, in which the aromatic ring cannot be planar to the carbocationic  $sp^2$  carbon for steric reasons (**c** and **d**), London interactions between the two aromatic rings are visible, compensating in part the destabilization caused by such a lack of planarity.

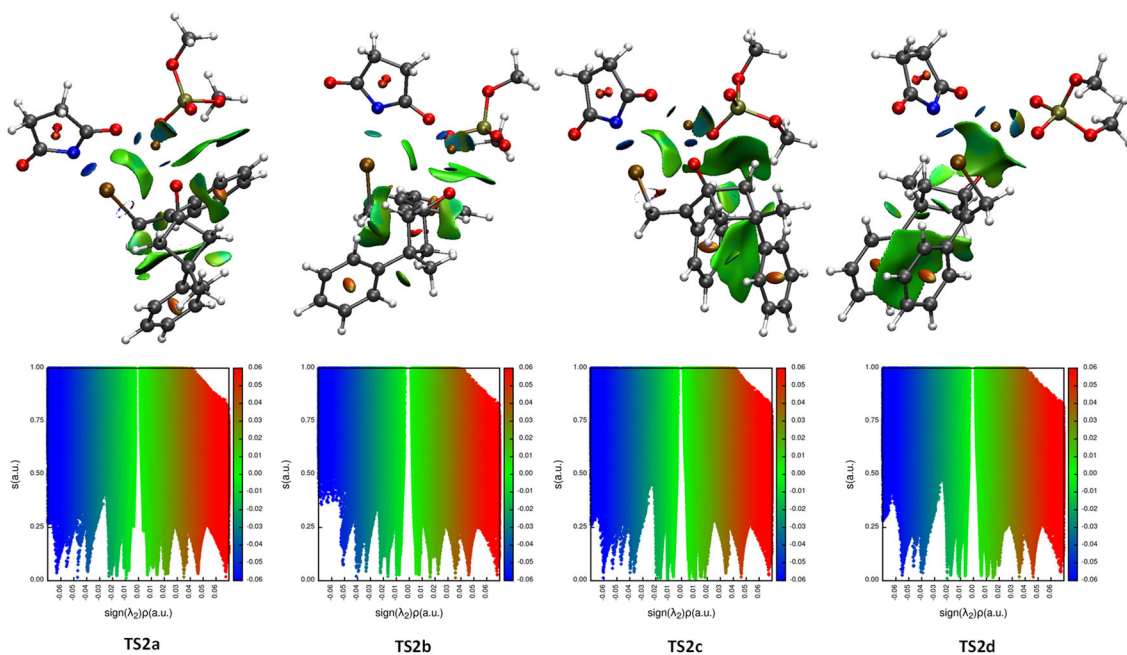

**Figure S 74.** NCI analysis for transition structures **TS2a**, **TS2b**, **TS2c** and **TS2d**. Top: Isosurfaces. Bottom:  $s(\mathbf{r})$  against  $\text{sign}(\lambda_2)\rho(\mathbf{r})$  plots (see text).

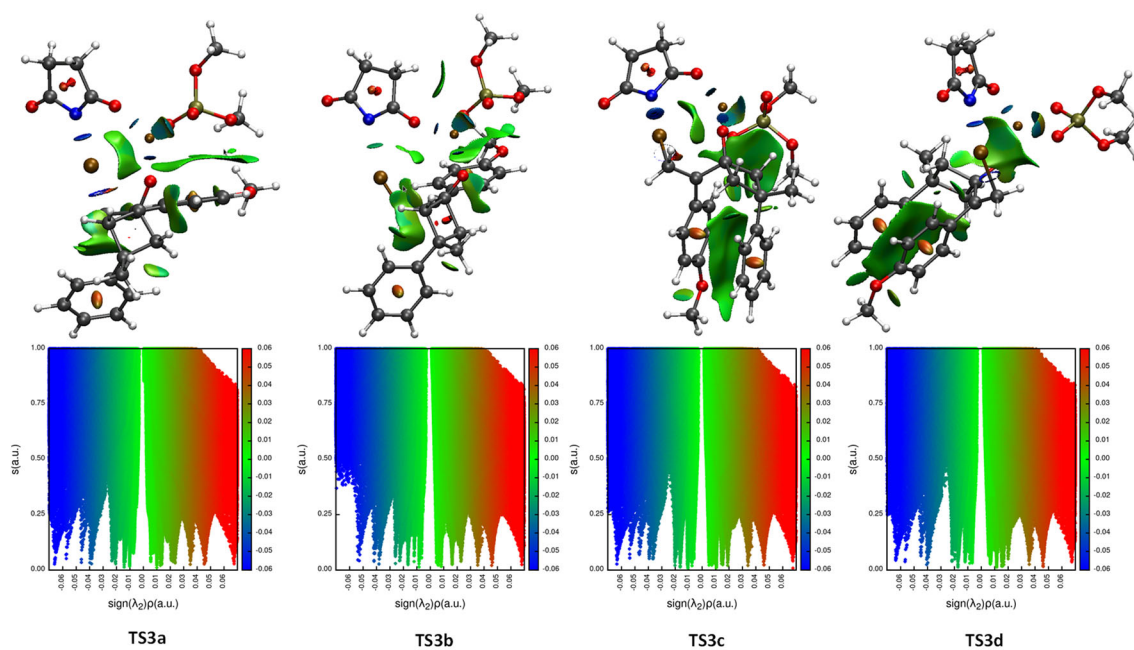

**Figure S 75.** NCI analysis for transition structures **TS3a**, **TS3b**, **TS3c** and **TS3d**. Top: Isosurfaces. Bottom:  $s(\mathbf{r})$  against  $\text{sign}(\lambda_2)\rho(\mathbf{r})$  plots (see text).

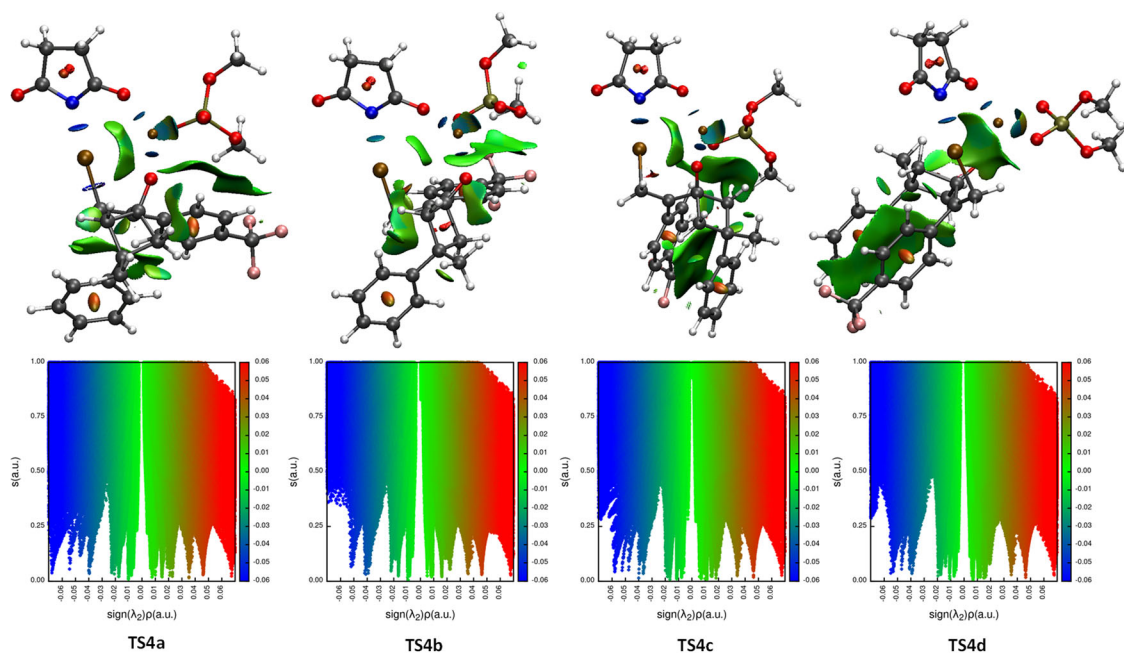

**Figure S 76.** NCI analysis for transition structures **TS4a**, **TS4b**, **TS4c** and **TS4d**. Top: Isosurfaces. Bottom:  $s(\mathbf{r})$  against  $\text{sign}(\lambda_2)\rho(\mathbf{r})$  plots (see text).

**Table S 26** Integration over the volumes of  $\text{sign}(\lambda_2)\rho(\mathbf{n})$  for  $n=2.5$  according to ref. 37 for **TS2a-d**

| interval             | TS2a        | TS2b        | TS2c        | TS2d        |
|----------------------|-------------|-------------|-------------|-------------|
| <b>all</b>           | -3.3160424  | -3.30680306 | -3.28056600 | -3.28024501 |
| <b>-1.0 to -0.02</b> | -0.23909918 | -0.23536056 | -0.23501657 | -0.23027198 |
| <b>-0.02 to 0.02</b> | 0.00412829  | 0.00406551  | 0.00424492  | 0.00421830  |
| <b>0.02 to 1.0</b>   | 0.30176314  | 0.30120803  | 0.30067717  | 0.29595285  |

<sup>a</sup> The interval  $[-0.1, -0.02]$  gives information about strong NCI (H-bond, halogen, etc.). The interval  $[-0.02, 0.02]$  gives information about van der Waals interactions. The interval  $[0.02, 1.00]$  gives information about steric clashes.

**Table S 27** Integration over the volumes of  $\text{sign}(\lambda_2)\rho(\mathbf{n})$  for  $n=2.5$  according to ref. 37 for **TS3a-d**

| interval             | TS3a        | TS3b        | TS3c        | TS3d        |
|----------------------|-------------|-------------|-------------|-------------|
| <b>all</b>           | -3.45146392 | -3.46129320 | -3.43458121 | -3.46034759 |
| <b>-1.0 to -0.02</b> | -0.24680436 | -0.24284827 | -0.24965565 | -0.24831046 |
| <b>-0.02 to 0.02</b> | 0.00424362  | 0.00410503  | 0.00446279  | 0.00433981  |
| <b>0.02 to 1.0</b>   | 0.31623560  | 0.00410503  | 0.31787636  | 0.31617245  |

<sup>a</sup> The interval  $[-0.1, -0.02]$  gives information about strong NCI (H-bond, halogen, etc.). The interval  $[-0.02, 0.02]$  gives information about van der Waals interactions. The interval  $[0.02, 1.00]$  gives information about steric clashes.

**Table S 28** Integration over the volumes of  $\text{sign}(\lambda_2)\rho(\mathbf{n})$  for  $n=2.5$  according to ref. 37 for **TS4a-d**

| interval             | TS4a        | TS4b        | TS4c        | TS4d        |
|----------------------|-------------|-------------|-------------|-------------|
| <b>all</b>           | -3.48364508 | -3.48392618 | -3.51629465 | -3.48151987 |
| <b>-1.0 to -0.02</b> | -0.23673273 | -0.23556756 | -0.23558497 | -0.23850609 |
| <b>-0.02 to 0.02</b> | 0.00424149  | 0.00417054  | 0.00443372  | 0.00443898  |
| <b>0.02 to 1.0</b>   | 0.31364802  | 0.31505788  | 0.31459717  | 0.31451545  |

<sup>a</sup> The interval  $[-0.1, -0.02]$  gives information about strong NCI (H-bond, halogen, etc.). The interval  $[-0.02, 0.02]$  gives information about van der Waals interactions. The interval  $[0.02, 1.00]$  gives information about steric clashes.

### *ELF Analysis*

The topological analysis of the gradient field of ELF provides *basins* which are the domains in which the probability of finding an electron pair is maximal. The basins are classified as core and valence basins. The latter are characterised by the synaptic order, i.e. the number of atomic valence shells in which they participate.<sup>20</sup> Thus, there are monosynaptic, disynaptic, basins and so on. Monosynaptic basins, labelled V(A), correspond to lone pairs or non-bonding regions, while disynaptic basins, labelled V(A,B), connect the core of two nuclei A and B and, thus, correspond to a bonding region between A and B. This description recovers the Lewis bonding model, and the representation of the evolution of electron population of basins along the reaction coordinate provides a very intuitive graphical representation of how the molecular system evolves during the reaction. To verify the sequence of events during the course of the reaction we carried out a topological ELF analyses of the IRCs corresponding to **TS2a**, **TS2b**, **TS2c** and **TS2d**. For the purpose of comparison, we also carried out the analyses of **TS3b** and **TS4b**. Monosynaptic basins correspond to lone pairs of individual atoms. Disynaptic basins correspond to bonds. For the exact value of the basins (indicating the electron population) in each point of the IRC see the corresponding table.<sup>21</sup> Figures illustrate the evolution of the electronic population for the corresponding basins. Graphical representation of the attractors (maxima of electron density) allows a rapid identification of the moment in which a bond is broken or formed. Prior to a bond formation, monosynaptic basins appear in the involved atoms (or in one of them if there is a significant difference in electronegativity). When a bond is broken, monosynaptic basins are visible after breaking. The graphics illustrate how the electron density changes along the reaction resembling a classical description of the mechanism using curved arrows. The punctual changes can be immediately recognized thus identifying the events of the reaction and the order in which they take place.

---

<sup>20</sup> Savin, A. *J. Chem. Sci.* **2005**, *117*, 473-475

<sup>21</sup> Only the representative basins that change during the reaction are collected

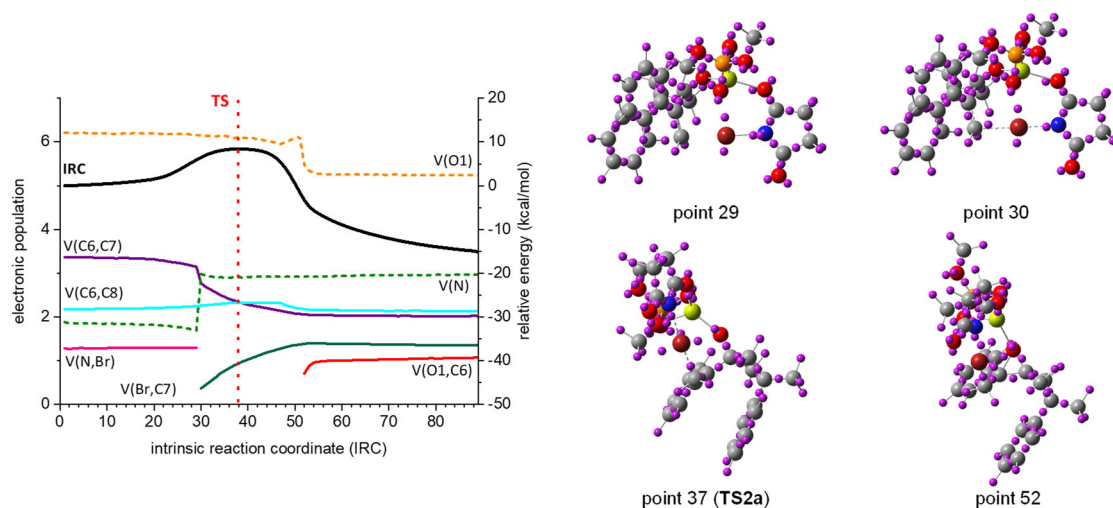

**Figure S 77.** Graphical representation of ELF analysis for the IRC corresponding to TS2a. Left: Evolution of the electron density along the IRC. Right: Position of attractors in critical and representative points.

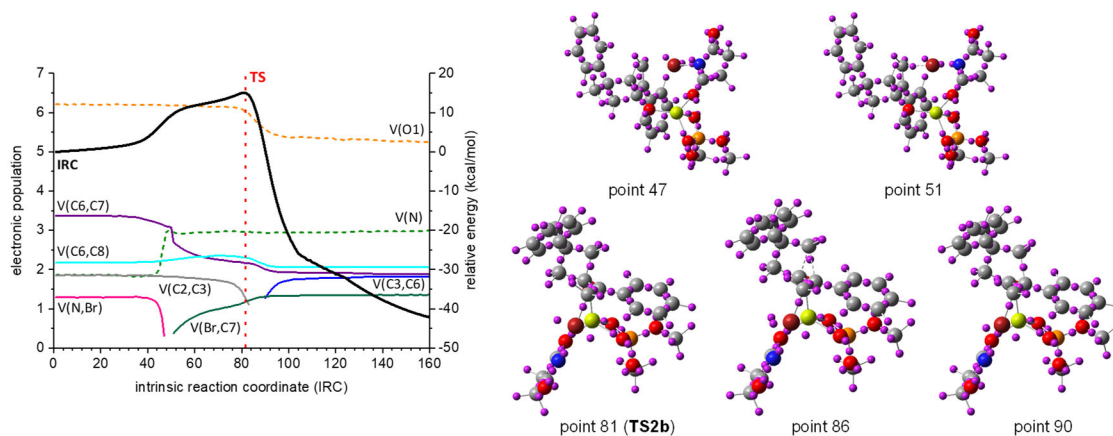

**Figure S 78.** Graphical representation of ELF analysis for the IRC corresponding to TS2b. Left: Evolution of the electron density along the IRC. Right: Position of attractors in critical and representative point

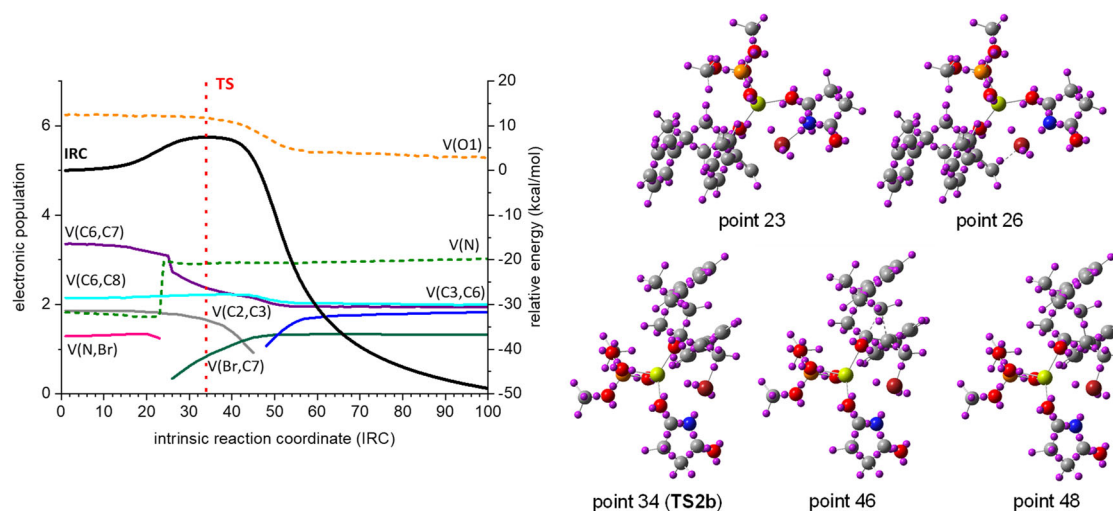

**Figure S 79.** Graphical representation of ELF analysis for the IRC corresponding to TS2c. Left: Evolution of the electron density along the IRC. Right: Position of attractors in critical and representative point

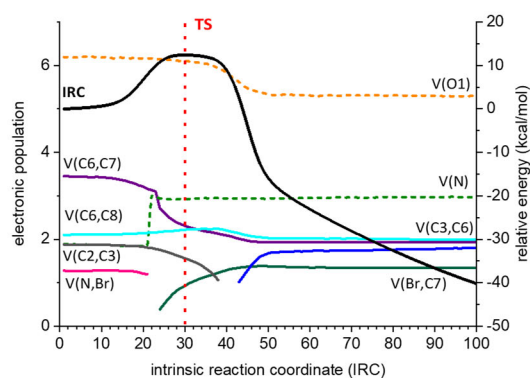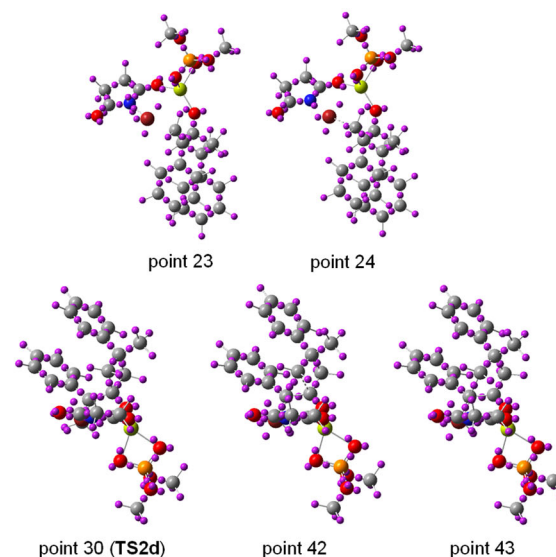

**Figure S 80.** Graphical representation of ELF analysis for the IRC corresponding to **TS2d**. Left: Evolution of the electron density along the IRC. Right: Position of attractors in critical and representative point

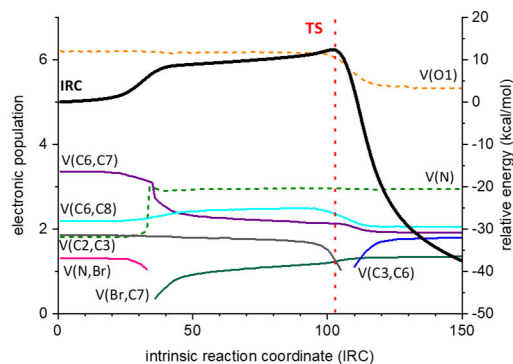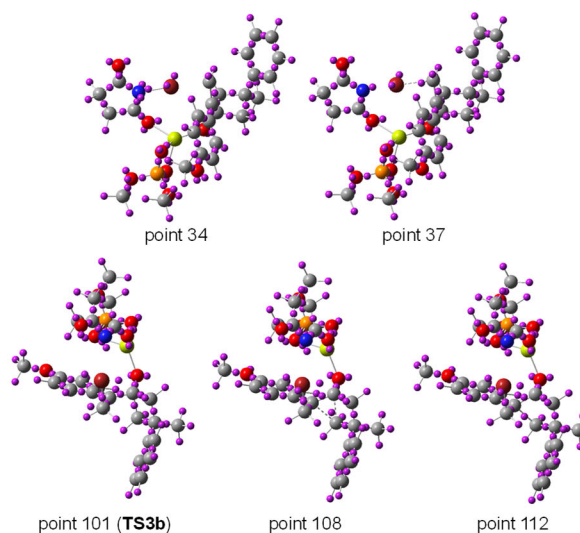

**Figure S 81.** Graphical representation of ELF analysis for the IRC corresponding to **TS3b**. Left: Evolution of the electron density along the IRC. Right: Position of attractors in critical and representative point

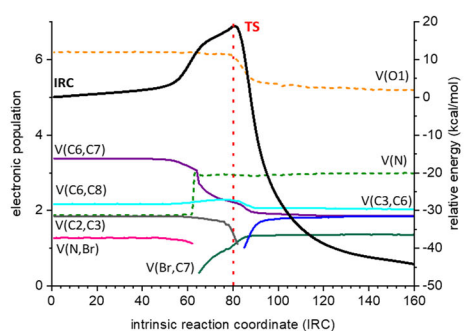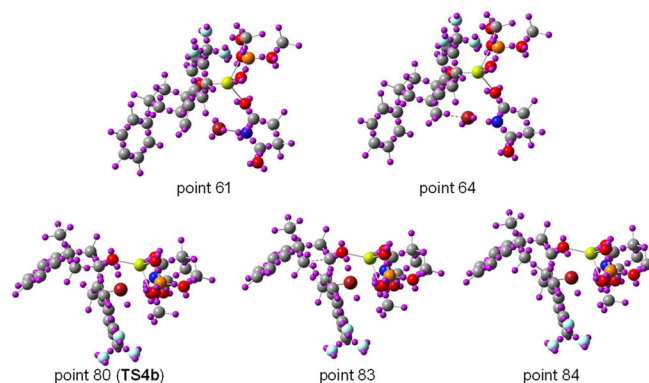

**Figure S 82.** Graphical representation of ELF analysis for the IRC corresponding to **TS4b**. Left: Evolution of the electron density along the IRC. Right: Position of attractors in critical and representative point

**Table S 29.** ELF basin populations for the IRC corresponding to **TS2a**.

|    | V(O1,C6) | V(C6,C8) | V(C7,Br) | V(O1) | V(C6,C7) | V(N,Br) | V(N) |
|----|----------|----------|----------|-------|----------|---------|------|
| 1  | -        | 2.18     | -        | 6.21  | 3.37     | 1.28    | 1.88 |
| 2  | -        | 2.18     | -        | 6.21  | 3.37     | 1.27    | 1.86 |
| 3  | -        | 2.18     | -        | 6.20  | 3.37     | 1.28    | 1.86 |
| 4  | -        | 2.18     | -        | 6.21  | 3.36     | 1.29    | 1.85 |
| 5  | -        | 2.18     | -        | 6.21  | 3.36     | 1.29    | 1.86 |
| 6  | -        | 2.18     | -        | 6.20  | 3.36     | 1.28    | 1.85 |
| 7  | -        | 2.18     | -        | 6.20  | 3.36     | 1.28    | 1.85 |
| 8  | -        | 2.19     | -        | 6.20  | 3.35     | 1.28    | 1.85 |
| 9  | -        | 2.19     | -        | 6.20  | 3.35     | 1.28    | 1.84 |
| 10 | -        | 2.19     | -        | 6.20  | 3.35     | 1.29    | 1.85 |
| 11 | -        | 2.19     | -        | 6.19  | 3.35     | 1.29    | 1.85 |
| 12 | -        | 2.19     | -        | 6.19  | 3.34     | 1.29    | 1.84 |
| 13 | -        | 2.19     | -        | 6.19  | 3.35     | 1.29    | 1.84 |
| 14 | -        | 2.19     | -        | 6.20  | 3.35     | 1.29    | 1.84 |
| 15 | -        | 2.19     | -        | 6.19  | 3.34     | 1.29    | 1.84 |
| 16 | -        | 2.19     | -        | 6.21  | 3.34     | 1.29    | 1.83 |
| 17 | -        | 2.19     | -        | 6.20  | 3.34     | 1.29    | 1.82 |
| 18 | -        | 2.20     | -        | 6.19  | 3.33     | 1.30    | 1.82 |
| 19 | -        | 2.20     | -        | 6.20  | 3.32     | 1.30    | 1.82 |
| 20 | -        | 2.20     | -        | 6.19  | 3.32     | 1.30    | 1.82 |
| 21 | -        | 2.21     | -        | 6.19  | 3.30     | 1.30    | 1.81 |
| 22 | -        | 2.21     | -        | 6.18  | 3.29     | 1.30    | 1.80 |
| 23 | -        | 2.22     | -        | 6.18  | 3.27     | 1.30    | 1.80 |
| 24 | -        | 2.22     | -        | 6.18  | 3.25     | 1.30    | 1.78 |
| 25 | -        | 2.22     | -        | 6.19  | 3.24     | 1.30    | 1.77 |
| 26 | -        | 2.23     | -        | 6.18  | 3.22     | 1.30    | 1.76 |
| 27 | -        | 2.24     | -        | 6.18  | 3.2      | 1.30    | 1.74 |
| 28 | -        | 2.24     | -        | 6.17  | 3.17     | 1.30    | 1.72 |
| 29 | -        | 2.25     | -        | 6.16  | 3.15     | 1.30    | 1.69 |
| 30 | -        | 2.26     | 0.37     | 6.15  | 2.77     | -       | 2.98 |
| 31 | -        | 2.27     | 0.45     | 6.14  | 2.69     | -       | 2.95 |
| 32 | -        | 2.28     | 0.53     | 6.14  | 2.63     | -       | 2.93 |
| 33 | -        | 2.29     | 0.61     | 6.13  | 2.57     | -       | 2.91 |
| 34 | -        | 2.30     | 0.70     | 6.14  | 2.51     | -       | 2.91 |
| 35 | -        | 2.31     | 0.77     | 6.14  | 2.46     | -       | 2.90 |
| 36 | -        | 2.32     | 0.83     | 6.12  | 2.41     | -       | 2.90 |
| 37 | -        | 2.32     | 0.89     | 6.09  | 2.38     | -       | 2.91 |
| 38 | -        | 2.33     | 0.94     | 6.11  | 2.34     | -       | 2.91 |
| 39 | -        | 2.33     | 0.99     | 6.10  | 2.31     | -       | 2.90 |
| 40 | -        | 2.33     | 1.03     | 6.08  | 2.28     | -       | 2.92 |
| 41 | -        | 2.33     | 1.07     | 6.09  | 2.26     | -       | 2.92 |
| 42 | -        | 2.33     | 1.11     | 6.06  | 2.24     | -       | 2.92 |
| 43 | -        | 2.33     | 1.15     | 6.05  | 2.22     | -       | 2.92 |
| 44 | -        | 2.32     | 1.19     | 6.02  | 2.20     | -       | 2.92 |
| 45 | -        | 2.32     | 1.22     | 6.00  | 2.18     | -       | 2.92 |
| 46 | -        | 2.32     | 1.25     | 5.99  | 2.16     | -       | 2.93 |
| 47 | -        | 2.32     | 1.28     | 5.95  | 2.14     | -       | 2.92 |
| 48 | -        | 2.27     | 1.31     | 6.00  | 2.12     | -       | 2.92 |
| 49 | -        | 2.24     | 1.34     | 6.04  | 2.10     | -       | 2.92 |
| 50 | -        | 2.21     | 1.36     | 6.09  | 2.08     | -       | 2.92 |
| 51 | -        | 2.19     | 1.37     | 6.12  | 2.07     | -       | 2.92 |



|    |      |      |      |      |      |   |      |
|----|------|------|------|------|------|---|------|
| 52 | 0.71 | 2.18 | 1.39 | 5.47 | 2.06 | - | 2.92 |
| 53 | 0.88 | 2.17 | 1.40 | 5.34 | 2.05 | - | 2.93 |
| 54 | 0.96 | 2.16 | 1.40 | 5.29 | 2.05 | - | 2.92 |
| 55 | 0.98 | 2.16 | 1.40 | 5.27 | 2.04 | - | 2.92 |
| 56 | 0.99 | 2.16 | 1.40 | 5.27 | 2.04 | - | 2.93 |
| 57 | 1.00 | 2.16 | 1.39 | 5.26 | 2.04 | - | 2.93 |
| 58 | 1.00 | 2.16 | 1.39 | 5.26 | 2.04 | - | 2.93 |
| 59 | 1.01 | 2.16 | 1.39 | 5.25 | 2.03 | - | 2.94 |
| 60 | 1.01 | 2.15 | 1.39 | 5.26 | 2.03 | - | 2.94 |
| 61 | 1.01 | 2.15 | 1.39 | 5.26 | 2.03 | - | 2.94 |
| 62 | 1.01 | 2.15 | 1.38 | 5.27 | 2.03 | - | 2.94 |
| 63 | 1.02 | 2.15 | 1.38 | 5.26 | 2.03 | - | 2.95 |
| 64 | 1.02 | 2.15 | 1.38 | 5.26 | 2.03 | - | 2.95 |
| 65 | 1.02 | 2.15 | 1.38 | 5.26 | 2.03 | - | 2.95 |
| 66 | 1.02 | 2.15 | 1.38 | 5.25 | 2.03 | - | 2.95 |
| 67 | 1.02 | 2.15 | 1.37 | 5.25 | 2.03 | - | 2.96 |
| 68 | 1.03 | 2.15 | 1.37 | 5.26 | 2.03 | - | 2.96 |
| 69 | 1.03 | 2.14 | 1.37 | 5.25 | 2.03 | - | 2.96 |
| 70 | 1.03 | 2.14 | 1.37 | 5.25 | 2.03 | - | 2.96 |
| 71 | 1.03 | 2.14 | 1.37 | 5.26 | 2.03 | - | 2.96 |
| 72 | 1.04 | 2.15 | 1.37 | 5.25 | 2.02 | - | 2.96 |
| 73 | 1.04 | 2.14 | 1.37 | 5.24 | 2.03 | - | 2.96 |
| 74 | 1.04 | 2.14 | 1.37 | 5.24 | 2.03 | - | 2.96 |
| 75 | 1.05 | 2.15 | 1.37 | 5.24 | 2.02 | - | 2.96 |
| 76 | 1.05 | 2.15 | 1.36 | 5.24 | 2.02 | - | 2.96 |
| 77 | 1.05 | 2.14 | 1.36 | 5.24 | 2.02 | - | 2.96 |
| 78 | 1.05 | 2.14 | 1.36 | 5.24 | 2.02 | - | 2.96 |
| 79 | 1.06 | 2.14 | 1.36 | 5.24 | 2.02 | - | 2.96 |
| 80 | 1.05 | 2.14 | 1.36 | 5.24 | 2.02 | - | 2.97 |
| 81 | 1.05 | 2.14 | 1.36 | 5.24 | 2.02 | - | 2.96 |
| 82 | 1.06 | 2.14 | 1.36 | 5.24 | 2.02 | - | 2.96 |
| 83 | 1.06 | 2.14 | 1.36 | 5.24 | 2.02 | - | 2.96 |
| 84 | 1.06 | 2.14 | 1.35 | 5.24 | 2.02 | - | 2.97 |
| 85 | 1.06 | 2.13 | 1.36 | 5.24 | 2.02 | - | 2.97 |
| 86 | 1.06 | 2.13 | 1.36 | 5.24 | 2.02 | - | 2.97 |
| 87 | 1.06 | 2.14 | 1.36 | 5.24 | 2.02 | - | 2.97 |
| 88 | 1.07 | 2.14 | 1.35 | 5.24 | 2.03 | - | 2.96 |
| 89 | 1.07 | 2.14 | 1.35 | 5.24 | 2.02 | - | 2.97 |

**Table S 30.** ELF basin populations for the IRC corresponding to **TS2b**.

|    | V(C2,C3) | V(C3,C6) | V(C6,C8) | V(C7,Br) | V(O1) | V(C6,C7) | V(N,Br) | VT(N) |
|----|----------|----------|----------|----------|-------|----------|---------|-------|
| 1  | 1.85     | -        | 2.17     | -        | 6.21  | 1.29     | 3.37    | 1.86  |
| 2  | 1.85     | -        | 2.17     | -        | 6.21  | 1.29     | 3.37    | 1.86  |
| 3  | 1.85     | -        | 2.17     | -        | 6.20  | 1.29     | 3.37    | 1.86  |
| 4  | 1.85     | -        | 2.17     | -        | 6.21  | 1.29     | 3.37    | 1.86  |
| 5  | 1.86     | -        | 2.17     | -        | 6.21  | 1.29     | 3.37    | 1.86  |
| 6  | 1.86     | -        | 2.17     | -        | 6.2   | 1.29     | 3.37    | 1.86  |
| 7  | 1.86     | -        | 2.17     | -        | 6.21  | 1.29     | 3.37    | 1.86  |
| 8  | 1.85     | -        | 2.18     | -        | 6.21  | 1.29     | 3.37    | 1.86  |
| 9  | 1.85     | -        | 2.17     | -        | 6.21  | 1.29     | 3.37    | 1.86  |
| 10 | 1.85     | -        | 2.17     | -        | 6.20  | 1.28     | 3.37    | 1.86  |
| 11 | 1.85     | -        | 2.17     | -        | 6.21  | 1.29     | 3.37    | 1.86  |

|    |      |   |      |      |      |      |      |      |
|----|------|---|------|------|------|------|------|------|
| 12 | 1.86 | - | 2.17 | -    | 6.21 | 1.29 | 3.37 | 1.86 |
| 13 | 1.85 | - | 2.17 | -    | 6.21 | 1.29 | 3.37 | 1.86 |
| 14 | 1.85 | - | 2.17 | -    | 6.21 | 1.29 | 3.37 | 1.86 |
| 15 | 1.85 | - | 2.17 | -    | 6.21 | 1.29 | 3.37 | 1.86 |
| 16 | 1.85 | - | 2.17 | -    | 6.20 | 1.29 | 3.37 | 1.86 |
| 17 | 1.85 | - | 2.17 | -    | 6.20 | 1.29 | 3.37 | 1.86 |
| 18 | 1.86 | - | 2.18 | -    | 6.20 | 1.29 | 3.37 | 1.86 |
| 19 | 1.86 | - | 2.18 | -    | 6.20 | 1.29 | 3.37 | 1.86 |
| 20 | 1.86 | - | 2.17 | -    | 6.20 | 1.29 | 3.37 | 1.86 |
| 21 | 1.85 | - | 2.17 | -    | 6.21 | 1.28 | 3.37 | 1.86 |
| 22 | 1.85 | - | 2.17 | -    | 6.21 | 1.29 | 3.37 | 1.86 |
| 23 | 1.85 | - | 2.17 | -    | 6.21 | 1.29 | 3.37 | 1.86 |
| 24 | 1.85 | - | 2.17 | -    | 6.20 | 1.29 | 3.37 | 1.86 |
| 25 | 1.85 | - | 2.17 | -    | 6.21 | 1.29 | 3.36 | 1.86 |
| 26 | 1.86 | - | 2.17 | -    | 6.21 | 1.29 | 3.36 | 1.86 |
| 27 | 1.86 | - | 2.17 | -    | 6.21 | 1.29 | 3.36 | 1.85 |
| 28 | 1.85 | - | 2.17 | -    | 6.21 | 1.29 | 3.37 | 1.85 |
| 29 | 1.84 | - | 2.18 | -    | 6.21 | 1.29 | 3.36 | 1.85 |
| 30 | 1.84 | - | 2.17 | -    | 6.20 | 1.29 | 3.35 | 1.83 |
| 31 | 1.84 | - | 2.17 | -    | 6.20 | 1.30 | 3.35 | 1.83 |
| 32 | 1.85 | - | 2.17 | -    | 6.20 | 1.30 | 3.34 | 1.83 |
| 33 | 1.85 | - | 2.17 | -    | 6.20 | 1.30 | 3.34 | 1.82 |
| 34 | 1.85 | - | 2.18 | -    | 6.19 | 1.30 | 3.34 | 1.83 |
| 35 | 1.85 | - | 2.18 | -    | 6.19 | 1.31 | 3.33 | 1.82 |
| 36 | 1.85 | - | 2.19 | -    | 6.20 | 1.30 | 3.32 | 1.82 |
| 37 | 1.85 | - | 2.19 | -    | 6.20 | 1.29 | 3.31 | 1.82 |
| 38 | 1.84 | - | 2.19 | -    | 6.19 | 1.28 | 3.29 | 1.83 |
| 39 | 1.85 | - | 2.19 | -    | 6.19 | 1.27 | 3.27 | 1.84 |
| 40 | 1.84 | - | 2.19 | -    | 6.19 | 1.27 | 3.26 | 1.84 |
| 41 | 1.84 | - | 2.20 | -    | 6.20 | 1.25 | 3.24 | 1.86 |
| 42 | 1.84 | - | 2.20 | -    | 6.20 | 1.23 | 3.23 | 1.86 |
| 43 | 1.83 | - | 2.20 | -    | 6.19 | 1.20 | 3.21 | 1.88 |
| 44 | 1.83 | - | 2.21 | -    | 6.19 | 1.15 | 3.19 | 1.92 |
| 45 | 1.83 | - | 2.21 | -    | 6.19 | 1.03 | 3.17 | 2.01 |
| 46 | 1.83 | - | 2.22 | -    | 6.19 | 0.80 | 3.15 | 2.42 |
| 47 | 1.82 | - | 2.23 | -    | 6.19 | 0.31 | 3.12 | 2.68 |
| 48 | 1.82 | - | 2.23 | -    | 6.19 | -    | 3.10 | 2.99 |
| 49 | 1.82 | - | 2.24 | -    | 6.18 | -    | 3.09 | 2.97 |
| 50 | 1.81 | - | 2.25 | -    | 6.18 | -    | 3.07 | 2.96 |
| 51 | 1.81 | - | 2.25 | 0.37 | 6.18 | -    | 2.70 | 2.95 |
| 52 | 1.81 | - | 2.26 | 0.44 | 6.18 | -    | 2.64 | 2.93 |
| 53 | 1.81 | - | 2.27 | 0.50 | 6.18 | -    | 2.60 | 2.92 |
| 54 | 1.8  | - | 2.27 | 0.56 | 6.18 | -    | 2.55 | 2.91 |
| 55 | 1.8  | - | 2.28 | 0.61 | 6.18 | -    | 2.52 | 2.92 |
| 56 | 1.79 | - | 2.29 | 0.66 | 6.18 | -    | 2.48 | 2.92 |
| 57 | 1.79 | - | 2.30 | 0.70 | 6.17 | -    | 2.45 | 2.92 |
| 58 | 1.78 | - | 2.31 | 0.74 | 6.17 | -    | 2.43 | 2.93 |
| 59 | 1.78 | - | 2.31 | 0.77 | 6.18 | -    | 2.40 | 2.94 |
| 60 | 1.78 | - | 2.32 | 0.80 | 6.17 | -    | 2.38 | 2.94 |
| 61 | 1.77 | - | 2.32 | 0.83 | 6.17 | -    | 2.36 | 2.95 |
| 62 | 1.77 | - | 2.32 | 0.86 | 6.16 | -    | 2.34 | 2.95 |
| 63 | 1.76 | - | 2.33 | 0.88 | 6.17 | -    | 2.33 | 2.95 |
| 64 | 1.76 | - | 2.33 | 0.9  | 6.15 | -    | 2.31 | 2.95 |
| 65 | 1.75 | - | 2.33 | 0.92 | 6.15 | -    | 2.30 | 2.95 |
| 66 | 1.75 | - | 2.34 | 0.94 | 6.14 | -    | 2.29 | 2.95 |
| 67 | 1.74 | - | 2.34 | 0.95 | 6.15 | -    | 2.28 | 2.95 |
| 68 | 1.74 | - | 2.35 | 0.97 | 6.15 | -    | 2.27 | 2.96 |
| 69 | 1.73 | - | 2.35 | 0.98 | 6.15 | -    | 2.26 | 2.96 |

|     |      |      |      |      |      |   |      |      |
|-----|------|------|------|------|------|---|------|------|
| 70  | 1.72 | -    | 2.35 | 0.99 | 6.15 | - | 2.25 | 2.96 |
| 71  | 1.71 | -    | 2.35 | 1.00 | 6.16 | - | 2.25 | 2.97 |
| 72  | 1.70 | -    | 2.35 | 1.02 | 6.15 | - | 2.24 | 2.97 |
| 73  | 1.69 | -    | 2.35 | 1.03 | 6.15 | - | 2.23 | 2.97 |
| 74  | 1.68 | -    | 2.34 | 1.04 | 6.14 | - | 2.22 | 2.97 |
| 75  | 1.66 | -    | 2.35 | 1.05 | 6.14 | - | 2.21 | 2.97 |
| 76  | 1.64 | -    | 2.34 | 1.07 | 6.14 | - | 2.20 | 2.97 |
| 77  | 1.62 | -    | 2.34 | 1.08 | 6.13 | - | 2.20 | 2.97 |
| 78  | 1.56 | -    | 2.33 | 1.10 | 6.12 | - | 2.19 | 2.97 |
| 79  | 1.52 | -    | 2.33 | 1.11 | 6.12 | - | 2.19 | 2.96 |
| 80  | 1.44 | -    | 2.31 | 1.14 | 6.09 | - | 2.18 | 2.96 |
| 81  | 1.33 | -    | 2.31 | 1.16 | 6.05 | - | 2.17 | 2.96 |
| 82  | 1.23 | -    | 2.30 | 1.19 | 6.01 | - | 2.16 | 2.95 |
| 83  | 1.11 | -    | 2.29 | 1.21 | 5.97 | - | 2.16 | 2.96 |
| 84  | -    | -    | 2.27 | 1.23 | 5.91 | - | 2.15 | 2.95 |
| 85  | -    | -    | 2.25 | 1.25 | 5.85 | - | 2.14 | 2.95 |
| 86  | -    | -    | 2.22 | 1.27 | 5.78 | - | 2.12 | 2.95 |
| 87  | -    | -    | 2.19 | 1.28 | 5.73 | - | 2.09 | 2.94 |
| 88  | -    | -    | 2.17 | 1.30 | 5.68 | - | 2.06 | 2.94 |
| 89  | -    | -    | 2.15 | 1.30 | 5.62 | - | 2.03 | 2.94 |
| 90  | -    | 1.27 | 2.13 | 1.31 | 5.58 | - | 2.00 | 2.94 |
| 91  | -    | 1.36 | 2.10 | 1.31 | 5.53 | - | 1.99 | 2.93 |
| 92  | -    | 1.44 | 2.09 | 1.32 | 5.49 | - | 1.97 | 2.93 |
| 93  | -    | 1.51 | 2.08 | 1.32 | 5.47 | - | 1.96 | 2.94 |
| 94  | -    | 1.57 | 2.07 | 1.32 | 5.44 | - | 1.95 | 2.94 |
| 95  | -    | 1.62 | 2.06 | 1.32 | 5.43 | - | 1.94 | 2.94 |
| 96  | -    | 1.66 | 2.06 | 1.32 | 5.41 | - | 1.94 | 2.94 |
| 97  | -    | 1.68 | 2.06 | 1.32 | 5.40 | - | 1.93 | 2.94 |
| 98  | -    | 1.70 | 2.06 | 1.32 | 5.39 | - | 1.93 | 2.94 |
| 99  | -    | 1.71 | 2.06 | 1.32 | 5.38 | - | 1.93 | 2.94 |
| 100 | -    | 1.72 | 2.06 | 1.32 | 5.37 | - | 1.93 | 2.94 |
| 101 | -    | 1.74 | 2.06 | 1.33 | 5.36 | - | 1.93 | 2.94 |
| 102 | -    | 1.75 | 2.06 | 1.33 | 5.37 | - | 1.93 | 2.95 |
| 103 | -    | 1.76 | 2.06 | 1.33 | 5.36 | - | 1.93 | 2.94 |
| 104 | -    | 1.76 | 2.06 | 1.33 | 5.38 | - | 1.92 | 2.95 |
| 105 | -    | 1.76 | 2.06 | 1.34 | 5.37 | - | 1.92 | 2.94 |
| 106 | -    | 1.76 | 2.06 | 1.34 | 5.38 | - | 1.92 | 2.94 |
| 107 | -    | 1.76 | 2.06 | 1.34 | 5.36 | - | 1.92 | 2.95 |
| 108 | -    | 1.77 | 2.06 | 1.34 | 5.37 | - | 1.92 | 2.94 |
| 109 | -    | 1.77 | 2.06 | 1.34 | 5.37 | - | 1.92 | 2.94 |
| 110 | -    | 1.77 | 2.07 | 1.34 | 5.37 | - | 1.92 | 2.94 |
| 111 | -    | 1.77 | 2.06 | 1.34 | 5.37 | - | 1.92 | 2.94 |
| 112 | -    | 1.77 | 2.07 | 1.34 | 5.35 | - | 1.92 | 2.94 |
| 113 | -    | 1.78 | 2.07 | 1.34 | 5.35 | - | 1.92 | 2.94 |
| 114 | -    | 1.78 | 2.07 | 1.34 | 5.35 | - | 1.92 | 2.94 |
| 115 | -    | 1.78 | 2.06 | 1.34 | 5.34 | - | 1.92 | 2.94 |
| 116 | -    | 1.78 | 2.07 | 1.34 | 5.35 | - | 1.92 | 2.94 |
| 117 | -    | 1.78 | 2.07 | 1.34 | 5.35 | - | 1.92 | 2.95 |
| 118 | -    | 1.78 | 2.07 | 1.34 | 5.35 | - | 1.92 | 2.95 |
| 119 | -    | 1.78 | 2.06 | 1.34 | 5.35 | - | 1.92 | 2.95 |
| 120 | -    | 1.79 | 2.06 | 1.34 | 5.31 | - | 1.91 | 2.95 |
| 121 | -    | 1.79 | 2.06 | 1.34 | 5.32 | - | 1.91 | 2.95 |
| 122 | -    | 1.79 | 2.06 | 1.35 | 5.31 | - | 1.91 | 2.96 |
| 123 | -    | 1.79 | 2.06 | 1.35 | 5.31 | - | 1.91 | 2.95 |
| 124 | -    | 1.79 | 2.06 | 1.35 | 5.3  | - | 1.91 | 2.95 |
| 125 | -    | 1.79 | 2.06 | 1.35 | 5.29 | - | 1.91 | 2.95 |
| 126 | -    | 1.79 | 2.06 | 1.35 | 5.33 | - | 1.91 | 2.96 |
| 127 | -    | 1.80 | 2.06 | 1.35 | 5.33 | - | 1.91 | 2.96 |

|     |   |      |      |      |      |   |      |      |
|-----|---|------|------|------|------|---|------|------|
| 128 | - | 1.80 | 2.06 | 1.35 | 5.32 | - | 1.90 | 2.96 |
| 129 | - | 1.80 | 2.06 | 1.35 | 5.32 | - | 1.90 | 2.96 |
| 130 | - | 1.80 | 2.06 | 1.35 | 5.31 | - | 1.90 | 2.97 |
| 131 | - | 1.80 | 2.06 | 1.35 | 5.31 | - | 1.90 | 2.97 |
| 132 | - | 1.81 | 2.06 | 1.35 | 5.32 | - | 1.90 | 2.97 |
| 133 | - | 1.81 | 2.06 | 1.35 | 5.31 | - | 1.90 | 2.97 |
| 134 | - | 1.81 | 2.06 | 1.35 | 5.31 | - | 1.90 | 2.96 |
| 135 | - | 1.81 | 2.06 | 1.35 | 5.30 | - | 1.90 | 2.96 |
| 136 | - | 1.81 | 2.06 | 1.35 | 5.30 | - | 1.89 | 2.96 |
| 137 | - | 1.81 | 2.06 | 1.35 | 5.29 | - | 1.89 | 2.97 |
| 138 | - | 1.81 | 2.06 | 1.35 | 5.30 | - | 1.89 | 2.97 |
| 139 | - | 1.81 | 2.06 | 1.36 | 5.30 | - | 1.89 | 2.97 |
| 140 | - | 1.81 | 2.06 | 1.35 | 5.28 | - | 1.89 | 2.97 |
| 141 | - | 1.81 | 2.06 | 1.35 | 5.29 | - | 1.89 | 2.97 |
| 142 | - | 1.81 | 2.06 | 1.35 | 5.28 | - | 1.89 | 2.97 |
| 143 | - | 1.81 | 2.06 | 1.35 | 5.27 | - | 1.89 | 2.97 |
| 144 | - | 1.81 | 2.06 | 1.35 | 5.27 | - | 1.89 | 2.97 |
| 145 | - | 1.81 | 2.06 | 1.35 | 5.27 | - | 1.89 | 2.97 |
| 146 | - | 1.81 | 2.06 | 1.36 | 5.27 | - | 1.88 | 2.97 |
| 147 | - | 1.82 | 2.06 | 1.35 | 5.27 | - | 1.88 | 2.96 |
| 148 | - | 1.82 | 2.06 | 1.35 | 5.27 | - | 1.88 | 2.97 |
| 149 | - | 1.82 | 2.06 | 1.35 | 5.28 | - | 1.88 | 2.97 |
| 150 | - | 1.82 | 2.06 | 1.35 | 5.27 | - | 1.88 | 2.97 |
| 151 | - | 1.82 | 2.06 | 1.35 | 5.28 | - | 1.88 | 2.98 |
| 152 | - | 1.82 | 2.06 | 1.36 | 5.27 | - | 1.88 | 2.98 |
| 153 | - | 1.82 | 2.06 | 1.35 | 5.27 | - | 1.88 | 2.98 |
| 154 | - | 1.82 | 2.06 | 1.35 | 5.26 | - | 1.88 | 2.98 |
| 155 | - | 1.82 | 2.06 | 1.35 | 5.26 | - | 1.88 | 2.98 |
| 156 | - | 1.82 | 2.06 | 1.36 | 5.25 | - | 1.88 | 2.98 |
| 157 | - | 1.82 | 2.06 | 1.35 | 5.25 | - | 1.88 | 2.98 |
| 158 | - | 1.82 | 2.06 | 1.35 | 5.25 | - | 1.88 | 2.98 |
| 159 | - | 1.82 | 2.06 | 1.35 | 5.25 | - | 1.88 | 2.99 |
| 160 | - | 1.82 | 2.05 | 1.36 | 5.24 | - | 1.88 | 2.99 |

**Table S 31.** ELF basin populations for the IRC corresponding to **TS2c**.

|    | V(C2,C3) | V(C3,C6) | V(C6,C8) | V(C7,Br) | V(O1) | V(C6,C7) | V(N,Br) | V(N) |
|----|----------|----------|----------|----------|-------|----------|---------|------|
| 1  | 1.86     | -        | 2.15     | -        | 6.24  | 3.35     | 1.29    | 1.82 |
| 2  | 1.86     | -        | 2.15     | -        | 6.25  | 3.36     | 1.30    | 1.82 |
| 3  | 1.86     | -        | 2.15     | -        | 6.25  | 3.35     | 1.30    | 1.82 |
| 4  | 1.86     | -        | 2.15     | -        | 6.24  | 3.35     | 1.30    | 1.81 |
| 5  | 1.86     | -        | 2.15     | -        | 6.24  | 3.35     | 1.30    | 1.80 |
| 6  | 1.86     | -        | 2.15     | -        | 6.23  | 3.34     | 1.30    | 1.80 |
| 7  | 1.86     | -        | 2.15     | -        | 6.24  | 3.35     | 1.30    | 1.80 |
| 8  | 1.86     | -        | 2.15     | -        | 6.25  | 3.34     | 1.31    | 1.79 |
| 9  | 1.86     | -        | 2.15     | -        | 6.25  | 3.34     | 1.31    | 1.79 |
| 10 | 1.85     | -        | 2.15     | -        | 6.24  | 3.32     | 1.31    | 1.79 |
| 11 | 1.86     | -        | 2.15     | -        | 6.24  | 3.32     | 1.31    | 1.78 |
| 12 | 1.85     | -        | 2.16     | -        | 6.24  | 3.32     | 1.32    | 1.78 |
| 13 | 1.85     | -        | 2.16     | -        | 6.24  | 3.31     | 1.32    | 1.77 |
| 14 | 1.85     | -        | 2.15     | -        | 6.23  | 3.3      | 1.33    | 1.77 |

|    |      |      |      |      |      |      |      |      |
|----|------|------|------|------|------|------|------|------|
| 15 | 1.85 | -    | 2.15 | -    | 6.22 | 3.29 | 1.33 | 1.76 |
| 16 | 1.85 | -    | 2.16 | -    | 6.21 | 3.28 | 1.34 | 1.74 |
| 17 | 1.85 | -    | 2.17 | -    | 6.22 | 3.25 | 1.34 | 1.73 |
| 18 | 1.84 | -    | 2.17 | -    | 6.21 | 3.23 | 1.34 | 1.73 |
| 19 | 1.84 | -    | 2.17 | -    | 6.21 | 3.21 | 1.34 | 1.72 |
| 20 | 1.83 | -    | 2.17 | -    | 6.23 | 3.19 | 1.34 | 1.72 |
| 21 | 1.83 | -    | 2.18 | -    | 6.23 | 3.17 | 1.31 | 1.72 |
| 22 | 1.83 | -    | 2.18 | -    | 6.23 | 3.15 | 1.28 | 1.73 |
| 23 | 1.81 | -    | 2.18 | -    | 6.22 | 3.13 | 1.24 | 1.75 |
| 24 | 1.80 | -    | 2.19 | -    | 6.21 | 3.11 | -    | 2.98 |
| 25 | 1.79 | -    | 2.19 | -    | 6.21 | 3.09 | -    | 2.96 |
| 26 | 1.79 | -    | 2.20 | 0.34 | 6.21 | 2.73 | -    | 2.95 |
| 27 | 1.78 | -    | 2.20 | 0.41 | 6.20 | 2.68 | -    | 2.93 |
| 28 | 1.77 | -    | 2.20 | 0.48 | 6.21 | 2.62 | -    | 2.92 |
| 29 | 1.75 | -    | 2.20 | 0.55 | 6.19 | 2.57 | -    | 2.91 |
| 30 | 1.73 | -    | 2.21 | 0.62 | 6.2  | 2.52 | -    | 2.91 |
| 31 | 1.71 | -    | 2.21 | 0.68 | 6.19 | 2.48 | -    | 2.91 |
| 32 | 1.70 | -    | 2.22 | 0.74 | 6.17 | 2.44 | -    | 2.91 |
| 33 | 1.68 | -    | 2.22 | 0.79 | 6.18 | 2.4  | -    | 2.91 |
| 34 | 1.65 | -    | 2.22 | 0.84 | 6.17 | 2.37 | -    | 2.93 |
| 35 | 1.62 | -    | 2.22 | 0.89 | 6.16 | 2.34 | -    | 2.92 |
| 36 | 1.59 | -    | 2.22 | 0.93 | 6.15 | 2.32 | -    | 2.92 |
| 37 | 1.56 | -    | 2.23 | 0.97 | 6.13 | 2.29 | -    | 2.93 |
| 38 | 1.52 | -    | 2.23 | 1.01 | 6.12 | 2.27 | -    | 2.93 |
| 39 | 1.45 | -    | 2.23 | 1.05 | 6.10 | 2.25 | -    | 2.93 |
| 40 | 1.39 | -    | 2.22 | 1.09 | 6.08 | 2.23 | -    | 2.93 |
| 41 | 1.31 | -    | 2.22 | 1.13 | 6.06 | 2.21 | -    | 2.94 |
| 42 | 1.22 | -    | 2.22 | 1.17 | 6.03 | 2.2  | -    | 2.94 |
| 43 | 1.11 | -    | 2.21 | 1.20 | 6.00 | 2.18 | -    | 2.93 |
| 44 | 1.01 | -    | 2.21 | 1.23 | 5.95 | 2.17 | -    | 2.93 |
| 45 | 0.92 | -    | 2.19 | 1.26 | 5.90 | 2.15 | -    | 2.93 |
| 46 | -    | -    | 2.18 | 1.27 | 5.85 | 2.12 | -    | 2.93 |
| 47 | -    | -    | 2.15 | 1.29 | 5.79 | 2.09 | -    | 2.93 |
| 48 | -    | 1.07 | 2.13 | 1.3  | 5.75 | 2.06 | -    | 2.93 |
| 49 | -    | 1.16 | 2.10 | 1.31 | 5.69 | 2.03 | -    | 2.93 |
| 50 | -    | 1.26 | 2.09 | 1.32 | 5.63 | 2.01 | -    | 2.93 |
| 51 | -    | 1.35 | 2.07 | 1.33 | 5.58 | 1.99 | -    | 2.93 |
| 52 | -    | 1.43 | 2.05 | 1.33 | 5.54 | 1.98 | -    | 2.93 |
| 53 | -    | 1.50 | 2.05 | 1.33 | 5.51 | 1.97 | -    | 2.93 |
| 54 | -    | 1.56 | 2.04 | 1.33 | 5.48 | 1.95 | -    | 2.92 |
| 55 | -    | 1.61 | 2.03 | 1.33 | 5.46 | 1.95 | -    | 2.92 |
| 56 | -    | 1.65 | 2.03 | 1.33 | 5.45 | 1.95 | -    | 2.92 |
| 57 | -    | 1.68 | 2.03 | 1.33 | 5.44 | 1.95 | -    | 2.93 |
| 58 | -    | 1.69 | 2.02 | 1.33 | 5.41 | 1.95 | -    | 2.93 |
| 59 | -    | 1.70 | 2.02 | 1.34 | 5.40 | 1.95 | -    | 2.94 |
| 60 | -    | 1.71 | 2.02 | 1.34 | 5.41 | 1.95 | -    | 2.94 |
| 61 | -    | 1.72 | 2.02 | 1.34 | 5.40 | 1.95 | -    | 2.94 |
| 62 | -    | 1.73 | 2.02 | 1.34 | 5.40 | 1.95 | -    | 2.95 |
| 63 | -    | 1.74 | 2.02 | 1.34 | 5.40 | 1.95 | -    | 2.95 |
| 64 | -    | 1.74 | 2.02 | 1.34 | 5.40 | 1.94 | -    | 2.95 |
| 65 | -    | 1.75 | 2.02 | 1.34 | 5.40 | 1.95 | -    | 2.95 |
| 66 | -    | 1.75 | 2.02 | 1.34 | 5.39 | 1.95 | -    | 2.95 |
| 67 | -    | 1.76 | 2.01 | 1.34 | 5.40 | 1.94 | -    | 2.95 |
| 68 | -    | 1.76 | 2.01 | 1.34 | 5.38 | 1.95 | -    | 2.96 |
| 69 | -    | 1.76 | 2.01 | 1.34 | 5.38 | 1.95 | -    | 2.96 |
| 70 | -    | 1.76 | 2.01 | 1.34 | 5.37 | 1.95 | -    | 2.96 |
| 71 | -    | 1.77 | 2.01 | 1.34 | 5.38 | 1.95 | -    | 2.96 |
| 72 | -    | 1.77 | 2.01 | 1.34 | 5.38 | 1.95 | -    | 2.96 |

|     |   |      |      |      |      |      |   |      |
|-----|---|------|------|------|------|------|---|------|
| 73  | - | 1.77 | 2.01 | 1.34 | 5.38 | 1.94 | - | 2.97 |
| 74  | - | 1.78 | 2.01 | 1.34 | 5.37 | 1.94 | - | 2.97 |
| 75  | - | 1.78 | 2.01 | 1.33 | 5.37 | 1.95 | - | 2.97 |
| 76  | - | 1.78 | 2.01 | 1.33 | 5.37 | 1.95 | - | 2.97 |
| 77  | - | 1.79 | 2.01 | 1.33 | 5.36 | 1.95 | - | 2.97 |
| 78  | - | 1.79 | 2.01 | 1.33 | 5.36 | 1.94 | - | 2.97 |
| 79  | - | 1.79 | 2.01 | 1.33 | 5.35 | 1.94 | - | 2.97 |
| 80  | - | 1.79 | 2.00 | 1.33 | 5.35 | 1.94 | - | 2.98 |
| 81  | - | 1.79 | 2.00 | 1.33 | 5.34 | 1.94 | - | 2.98 |
| 82  | - | 1.80 | 2.00 | 1.33 | 5.33 | 1.94 | - | 2.99 |
| 83  | - | 1.80 | 2.00 | 1.33 | 5.33 | 1.95 | - | 2.99 |
| 84  | - | 1.80 | 2.00 | 1.33 | 5.31 | 1.95 | - | 2.99 |
| 85  | - | 1.80 | 2.00 | 1.33 | 5.33 | 1.94 | - | 3.00 |
| 86  | - | 1.80 | 2.00 | 1.33 | 5.33 | 1.94 | - | 2.99 |
| 87  | - | 1.81 | 2.00 | 1.33 | 5.31 | 1.94 | - | 2.99 |
| 88  | - | 1.81 | 2.00 | 1.33 | 5.28 | 1.94 | - | 3.00 |
| 89  | - | 1.81 | 2.00 | 1.33 | 5.29 | 1.94 | - | 3.00 |
| 90  | - | 1.81 | 2.00 | 1.33 | 5.31 | 1.94 | - | 3.00 |
| 91  | - | 1.81 | 2.00 | 1.32 | 5.31 | 1.94 | - | 3.00 |
| 92  | - | 1.81 | 1.99 | 1.32 | 5.30 | 1.94 | - | 3.00 |
| 93  | - | 1.81 | 1.99 | 1.32 | 5.30 | 1.94 | - | 3.00 |
| 94  | - | 1.81 | 1.99 | 1.32 | 5.29 | 1.94 | - | 3.01 |
| 95  | - | 1.82 | 2.00 | 1.33 | 5.29 | 1.94 | - | 3.01 |
| 96  | - | 1.82 | 2.00 | 1.32 | 5.30 | 1.94 | - | 3.01 |
| 97  | - | 1.82 | 2.00 | 1.32 | 5.31 | 1.94 | - | 3.02 |
| 98  | - | 1.82 | 2.00 | 1.32 | 5.30 | 1.94 | - | 3.02 |
| 99  | - | 1.82 | 2.00 | 1.33 | 5.28 | 1.94 | - | 3.03 |
| 100 | - | 1.82 | 2.00 | 1.32 | 5.29 | 1.94 | - | 3.02 |

**Table S 32.** ELF basin populations for the IRC corresponding to **TS2d**.

|    | V(C2,C3) | V(C3,C6) | V(C6,C8) | V(C7,Br) | V(O1) | V(C6,C7) | V(N,Br) | V(N) |
|----|----------|----------|----------|----------|-------|----------|---------|------|
| 1  | 1.88     | -        | 2.10     | -        | 6.19  | 3.45     | 1.28    | 1.89 |
| 2  | 1.88     | -        | 2.10     | -        | 6.19  | 3.45     | 1.27    | 1.89 |
| 3  | 1.88     | -        | 2.11     | -        | 6.18  | 3.44     | 1.27    | 1.89 |
| 4  | 1.88     | -        | 2.11     | -        | 6.18  | 3.44     | 1.27    | 1.88 |
| 5  | 1.87     | -        | 2.11     | -        | 6.19  | 3.44     | 1.27    | 1.88 |
| 6  | 1.87     | -        | 2.11     | -        | 6.2   | 3.44     | 1.27    | 1.88 |
| 7  | 1.87     | -        | 2.11     | -        | 6.2   | 3.43     | 1.27    | 1.89 |
| 8  | 1.87     | -        | 2.11     | -        | 6.2   | 3.43     | 1.28    | 1.88 |
| 9  | 1.87     | -        | 2.11     | -        | 6.18  | 3.44     | 1.28    | 1.87 |
| 10 | 1.87     | -        | 2.11     | -        | 6.18  | 3.42     | 1.28    | 1.88 |
| 11 | 1.87     | -        | 2.11     | -        | 6.19  | 3.42     | 1.28    | 1.87 |
| 12 | 1.87     | -        | 2.11     | -        | 6.17  | 3.41     | 1.28    | 1.87 |
| 13 | 1.86     | -        | 2.11     | -        | 6.16  | 3.4      | 1.28    | 1.86 |
| 14 | 1.86     | -        | 2.11     | -        | 6.18  | 3.38     | 1.28    | 1.86 |
| 15 | 1.86     | -        | 2.12     | -        | 6.18  | 3.36     | 1.27    | 1.85 |
| 16 | 1.85     | -        | 2.12     | -        | 6.17  | 3.34     | 1.27    | 1.85 |
| 17 | 1.85     | -        | 2.13     | -        | 6.16  | 3.31     | 1.27    | 1.85 |
| 18 | 1.84     | -        | 2.13     | -        | 6.17  | 3.28     | 1.26    | 1.85 |
| 19 | 1.84     | -        | 2.14     | -        | 6.16  | 3.24     | 1.24    | 1.85 |
| 20 | 1.83     | -        | 2.14     | -        | 6.16  | 3.21     | 1.21    | 1.85 |
| 21 | 1.81     | -        | 2.15     | -        | 6.16  | 3.16     | 1.20    | 1.85 |

|    |      |      |      |      |      |      |   |      |
|----|------|------|------|------|------|------|---|------|
| 22 | 1.80 | -    | 2.15 | -    | 6.16 | 3.13 | - | 3.01 |
| 23 | 1.78 | -    | 2.16 | -    | 6.15 | 3.10 | - | 2.97 |
| 24 | 1.76 | -    | 2.17 | 0.39 | 6.14 | 2.71 | - | 2.94 |
| 25 | 1.73 | -    | 2.18 | 0.51 | 6.14 | 2.61 | - | 2.92 |
| 26 | 1.70 | -    | 2.18 | 0.63 | 6.13 | 2.52 | - | 2.92 |
| 27 | 1.67 | -    | 2.19 | 0.73 | 6.12 | 2.45 | - | 2.92 |
| 28 | 1.63 | -    | 2.20 | 0.82 | 6.11 | 2.39 | - | 2.92 |
| 29 | 1.60 | -    | 2.21 | 0.88 | 6.10 | 2.35 | - | 2.93 |
| 30 | 1.56 | -    | 2.22 | 0.93 | 6.10 | 2.31 | - | 2.93 |
| 31 | 1.53 | -    | 2.23 | 0.99 | 6.09 | 2.28 | - | 2.93 |
| 32 | 1.49 | -    | 2.23 | 1.03 | 6.08 | 2.25 | - | 2.93 |
| 33 | 1.45 | -    | 2.23 | 1.07 | 6.07 | 2.23 | - | 2.94 |
| 34 | 1.40 | -    | 2.24 | 1.11 | 6.05 | 2.20 | - | 2.94 |
| 35 | 1.33 | -    | 2.24 | 1.14 | 6.04 | 2.18 | - | 2.95 |
| 36 | 1.26 | -    | 2.23 | 1.17 | 6.02 | 2.17 | - | 2.94 |
| 37 | 1.17 | -    | 2.24 | 1.20 | 5.98 | 2.15 | - | 2.95 |
| 38 | 1.06 | -    | 2.24 | 1.23 | 5.94 | 2.13 | - | 2.95 |
| 39 | -    | -    | 2.23 | 1.26 | 5.89 | 2.11 | - | 2.94 |
| 40 | -    | -    | 2.2  | 1.29 | 5.84 | 2.09 | - | 2.94 |
| 41 | -    | -    | 2.18 | 1.32 | 5.75 | 2.07 | - | 2.94 |
| 42 | -    | -    | 2.16 | 1.33 | 5.68 | 2.04 | - | 2.94 |
| 43 | -    | 1.02 | 2.14 | 1.35 | 5.62 | 2.01 | - | 2.94 |
| 44 | -    | 1.15 | 2.11 | 1.36 | 5.54 | 1.99 | - | 2.94 |
| 45 | -    | 1.28 | 2.09 | 1.37 | 5.47 | 1.97 | - | 2.94 |
| 46 | -    | 1.41 | 2.07 | 1.38 | 5.44 | 1.95 | - | 2.94 |
| 47 | -    | 1.51 | 2.06 | 1.38 | 5.40 | 1.95 | - | 2.94 |
| 48 | -    | 1.60 | 2.05 | 1.39 | 5.39 | 1.93 | - | 2.94 |
| 49 | -    | 1.64 | 2.04 | 1.39 | 5.36 | 1.94 | - | 2.93 |
| 50 | -    | 1.68 | 2.03 | 1.38 | 5.34 | 1.94 | - | 2.94 |
| 51 | -    | 1.70 | 2.03 | 1.38 | 5.32 | 1.94 | - | 2.94 |
| 52 | -    | 1.70 | 2.02 | 1.37 | 5.31 | 1.94 | - | 2.94 |
| 53 | -    | 1.71 | 2.02 | 1.37 | 5.32 | 1.94 | - | 2.94 |
| 54 | -    | 1.71 | 2.02 | 1.37 | 5.33 | 1.94 | - | 2.94 |
| 55 | -    | 1.72 | 2.02 | 1.36 | 5.33 | 1.94 | - | 2.94 |
| 56 | -    | 1.72 | 2.02 | 1.36 | 5.32 | 1.94 | - | 2.94 |
| 57 | -    | 1.73 | 2.02 | 1.36 | 5.32 | 1.94 | - | 2.95 |
| 58 | -    | 1.72 | 2.02 | 1.36 | 5.32 | 1.94 | - | 2.95 |
| 59 | -    | 1.73 | 2.02 | 1.36 | 5.31 | 1.94 | - | 2.95 |
| 60 | -    | 1.73 | 2.02 | 1.35 | 5.31 | 1.94 | - | 2.95 |
| 61 | -    | 1.74 | 2.02 | 1.35 | 5.3  | 1.94 | - | 2.95 |
| 62 | -    | 1.74 | 2.02 | 1.36 | 5.29 | 1.94 | - | 2.96 |
| 63 | -    | 1.74 | 2.02 | 1.36 | 5.31 | 1.94 | - | 2.95 |
| 64 | -    | 1.73 | 2.01 | 1.35 | 5.31 | 1.94 | - | 2.95 |
| 65 | -    | 1.74 | 2.02 | 1.35 | 5.31 | 1.94 | - | 2.96 |
| 66 | -    | 1.74 | 2.02 | 1.35 | 5.31 | 1.94 | - | 2.96 |
| 67 | -    | 1.74 | 2.02 | 1.35 | 5.30 | 1.94 | - | 2.97 |
| 68 | -    | 1.74 | 2.01 | 1.35 | 5.30 | 1.94 | - | 2.96 |
| 69 | -    | 1.75 | 2.02 | 1.35 | 5.32 | 1.94 | - | 2.96 |
| 70 | -    | 1.75 | 2.02 | 1.35 | 5.31 | 1.94 | - | 2.97 |
| 71 | -    | 1.75 | 2.02 | 1.35 | 5.31 | 1.94 | - | 2.96 |
| 72 | -    | 1.75 | 2.01 | 1.35 | 5.31 | 1.94 | - | 2.96 |
| 73 | -    | 1.75 | 2.01 | 1.35 | 5.31 | 1.94 | - | 2.95 |
| 74 | -    | 1.75 | 2.01 | 1.35 | 5.31 | 1.94 | - | 2.96 |
| 75 | -    | 1.75 | 2.01 | 1.35 | 5.31 | 1.94 | - | 2.96 |
| 76 | -    | 1.76 | 2.01 | 1.35 | 5.32 | 1.94 | - | 2.96 |
| 77 | -    | 1.76 | 2.01 | 1.35 | 5.30 | 1.94 | - | 2.97 |
| 78 | -    | 1.76 | 2.01 | 1.35 | 5.30 | 1.94 | - | 2.97 |
| 79 | -    | 1.76 | 2.01 | 1.35 | 5.31 | 1.94 | - | 2.97 |

|     |   |      |      |      |      |      |   |      |
|-----|---|------|------|------|------|------|---|------|
| 80  | - | 1.76 | 2.01 | 1.35 | 5.31 | 1.94 | - | 2.97 |
| 81  | - | 1.77 | 2.01 | 1.35 | 5.31 | 1.94 | - | 2.97 |
| 82  | - | 1.77 | 2.01 | 1.35 | 5.30 | 1.94 | - | 2.97 |
| 83  | - | 1.77 | 2.01 | 1.35 | 5.31 | 1.94 | - | 2.97 |
| 84  | - | 1.77 | 2.00 | 1.35 | 5.30 | 1.94 | - | 2.97 |
| 85  | - | 1.77 | 2.00 | 1.35 | 5.30 | 1.94 | - | 2.97 |
| 86  | - | 1.78 | 2.00 | 1.35 | 5.30 | 1.94 | - | 2.97 |
| 87  | - | 1.78 | 2.00 | 1.35 | 5.31 | 1.94 | - | 2.97 |
| 88  | - | 1.78 | 2.00 | 1.35 | 5.30 | 1.94 | - | 2.97 |
| 89  | - | 1.78 | 2.00 | 1.35 | 5.30 | 1.94 | - | 2.97 |
| 90  | - | 1.78 | 2.00 | 1.35 | 5.30 | 1.94 | - | 2.97 |
| 91  | - | 1.79 | 2.00 | 1.34 | 5.30 | 1.94 | - | 2.97 |
| 92  | - | 1.79 | 2.00 | 1.34 | 5.29 | 1.94 | - | 2.97 |
| 93  | - | 1.79 | 2.00 | 1.34 | 5.30 | 1.94 | - | 2.97 |
| 94  | - | 1.79 | 2.00 | 1.34 | 5.29 | 1.94 | - | 2.98 |
| 95  | - | 1.80 | 2.00 | 1.34 | 5.29 | 1.94 | - | 2.97 |
| 96  | - | 1.79 | 2.00 | 1.34 | 5.29 | 1.94 | - | 2.97 |
| 97  | - | 1.80 | 2.00 | 1.34 | 5.29 | 1.93 | - | 2.97 |
| 98  | - | 1.80 | 2.00 | 1.34 | 5.29 | 1.93 | - | 2.97 |
| 99  | - | 1.80 | 2.00 | 1.34 | 5.30 | 1.93 | - | 2.97 |
| 100 | - | 1.80 | 2.00 | 1.34 | 5.30 | 1.93 | - | 2.97 |
| 101 | - | 1.81 | 2.00 | 1.34 | 5.30 | 1.93 | - | 2.97 |
| 102 | - | 1.81 | 2.00 | 1.34 | 5.30 | 1.93 | - | 2.98 |
| 103 | - | 1.8  | 2.00 | 1.35 | 5.31 | 1.94 | - | 2.98 |
| 104 | - | 1.81 | 2.00 | 1.35 | 5.3  | 1.94 | - | 2.98 |
| 105 | - | 1.81 | 1.99 | 1.34 | 5.29 | 1.93 | - | 2.98 |
| 106 | - | 1.81 | 1.99 | 1.35 | 5.31 | 1.93 | - | 2.98 |
| 107 | - | 1.81 | 1.99 | 1.34 | 5.3  | 1.94 | - | 2.98 |
| 108 | - | 1.81 | 1.99 | 1.34 | 5.29 | 1.93 | - | 2.97 |
| 109 | - | 1.81 | 1.99 | 1.34 | 5.29 | 1.93 | - | 2.98 |
| 110 | - | 1.82 | 1.99 | 1.34 | 5.29 | 1.93 | - | 2.98 |

**Table S 33.** ELF basin populations for the IRC corresponding to **TS3b**.

|    | V(C2,C3) | V(C3,C6) | V(C6,C8) | V(C7,Br) | V(O1) | V(C6,C7) | V(N,Br) | V(N) |
|----|----------|----------|----------|----------|-------|----------|---------|------|
| 1  | 1.86     | --       | 2.18     | --       | 6.20  | 3.36     | 1.31    | 1.81 |
| 2  | 1.86     | --       | 2.18     | --       | 6.19  | 3.36     | 1.31    | 1.81 |
| 3  | 1.86     | --       | 2.18     | --       | 6.20  | 3.36     | 1.31    | 1.81 |
| 4  | 1.86     | --       | 2.18     | --       | 6.19  | 3.36     | 1.31    | 1.81 |
| 5  | 1.86     | --       | 2.18     | --       | 6.2   | 3.36     | 1.31    | 1.81 |
| 6  | 1.86     | --       | 2.18     | --       | 6.20  | 3.36     | 1.31    | 1.81 |
| 7  | 1.86     | --       | 2.18     | --       | 6.19  | 3.36     | 1.31    | 1.81 |
| 8  | 1.86     | --       | 2.18     | --       | 6.20  | 3.36     | 1.31    | 1.81 |
| 9  | 1.86     | --       | 2.18     | --       | 6.19  | 3.36     | 1.31    | 1.81 |
| 10 | 1.86     | --       | 2.18     | --       | 6.20  | 3.36     | 1.31    | 1.81 |
| 11 | 1.85     | --       | 2.19     | --       | 6.20  | 3.36     | 1.31    | 1.81 |
| 12 | 1.85     | --       | 2.19     | --       | 6.19  | 3.36     | 1.31    | 1.81 |
| 13 | 1.85     | --       | 2.19     | --       | 6.20  | 3.36     | 1.31    | 1.81 |
| 14 | 1.85     | --       | 2.19     | --       | 6.19  | 3.35     | 1.31    | 1.81 |
| 15 | 1.85     | --       | 2.19     | --       | 6.20  | 3.35     | 1.31    | 1.81 |
| 16 | 1.85     | --       | 2.19     | --       | 6.20  | 3.35     | 1.31    | 1.81 |
| 17 | 1.85     | --       | 2.19     | --       | 6.19  | 3.35     | 1.31    | 1.81 |
| 18 | 1.85     | --       | 2.19     | --       | 6.20  | 3.34     | 1.31    | 1.81 |



|    |      |    |      |      |      |      |      |      |
|----|------|----|------|------|------|------|------|------|
| 19 | 1.85 | -- | 2.19 | --   | 6.19 | 3.34 | 1.30 | 1.81 |
| 20 | 1.85 | -- | 2.19 | --   | 6.20 | 3.33 | 1.30 | 1.81 |
| 21 | 1.85 | -- | 2.19 | --   | 6.20 | 3.33 | 1.30 | 1.81 |
| 22 | 1.85 | -  | 2.19 | -    | 6.20 | 3.33 | 1.30 | 1.81 |
| 23 | 1.84 | -  | 2.19 | -    | 6.19 | 3.32 | 1.30 | 1.81 |
| 24 | 1.85 | -  | 2.19 | -    | 6.20 | 3.30 | 1.30 | 1.81 |
| 25 | 1.84 | -  | 2.20 | -    | 6.19 | 3.29 | 1.29 | 1.81 |
| 26 | 1.84 | -  | 2.20 | -    | 6.20 | 3.26 | 1.29 | 1.82 |
| 27 | 1.84 | -  | 2.21 | -    | 6.21 | 3.25 | 1.26 | 1.82 |
| 28 | 1.85 | -  | 2.21 | -    | 6.20 | 3.24 | 1.24 | 1.83 |
| 29 | 1.84 | -  | 2.22 | -    | 6.20 | 3.22 | 1.22 | 1.85 |
| 30 | 1.84 | -  | 2.23 | -    | 6.20 | 3.20 | 1.19 | 1.87 |
| 31 | 1.84 | -  | 2.23 | -    | 6.20 | 3.18 | 1.16 | 1.89 |
| 32 | 1.84 | -  | 2.24 | -    | 6.19 | 3.16 | 1.10 | 1.92 |
| 33 | 1.83 | -  | 2.25 | -    | 6.19 | 3.14 | 1.05 | 1.96 |
| 34 | 1.83 | -  | 2.26 | -    | 6.19 | 3.12 | -    | 2.99 |
| 35 | 1.83 | -  | 2.28 | -    | 6.18 | 3.1  | -    | 2.97 |
| 36 | 1.83 | -  | 2.30 | 0.36 | 6.18 | 2.73 | -    | 2.96 |
| 37 | 1.83 | -  | 2.30 | 0.43 | 6.17 | 2.67 | -    | 2.94 |
| 38 | 1.83 | -  | 2.31 | 0.5  | 6.18 | 2.61 | -    | 2.92 |
| 39 | 1.83 | -  | 2.32 | 0.56 | 6.17 | 2.56 | -    | 2.91 |
| 40 | 1.82 | -  | 2.34 | 0.62 | 6.17 | 2.52 | -    | 2.90 |
| 41 | 1.82 | -  | 2.35 | 0.68 | 6.16 | 2.48 | -    | 2.91 |
| 42 | 1.82 | -  | 2.36 | 0.73 | 6.15 | 2.44 | -    | 2.91 |
| 43 | 1.81 | -  | 2.37 | 0.78 | 6.14 | 2.41 | -    | 2.92 |
| 44 | 1.81 | -  | 2.38 | 0.81 | 6.16 | 2.39 | -    | 2.92 |
| 45 | 1.81 | -  | 2.39 | 0.84 | 6.17 | 2.37 | -    | 2.92 |
| 46 | 1.80 | -  | 2.40 | 0.86 | 6.18 | 2.36 | -    | 2.92 |
| 47 | 1.80 | -  | 2.40 | 0.88 | 6.17 | 2.35 | -    | 2.92 |
| 48 | 1.80 | -  | 2.41 | 0.89 | 6.17 | 2.34 | -    | 2.92 |
| 49 | 1.80 | -  | 2.42 | 0.91 | 6.16 | 2.33 | -    | 2.93 |
| 50 | 1.80 | -  | 2.42 | 0.92 | 6.16 | 2.32 | -    | 2.93 |
| 51 | 1.80 | -  | 2.42 | 0.93 | 6.16 | 2.31 | -    | 2.93 |
| 52 | 1.80 | -  | 2.42 | 0.95 | 6.17 | 2.30 | -    | 2.93 |
| 53 | 1.80 | -  | 2.43 | 0.95 | 6.17 | 2.30 | -    | 2.94 |
| 54 | 1.80 | -  | 2.43 | 0.96 | 6.18 | 2.29 | -    | 2.94 |
| 55 | 1.80 | -  | 2.44 | 0.97 | 6.17 | 2.29 | -    | 2.94 |
| 56 | 1.78 | -  | 2.44 | 0.98 | 6.17 | 2.28 | -    | 2.94 |
| 57 | 1.78 | -  | 2.44 | 0.99 | 6.16 | 2.27 | -    | 2.94 |
| 58 | 1.78 | -  | 2.44 | 0.99 | 6.17 | 2.27 | -    | 2.94 |
| 59 | 1.78 | -  | 2.45 | 1.00 | 6.18 | 2.27 | -    | 2.95 |
| 60 | 1.79 | -  | 2.45 | 1.00 | 6.18 | 2.26 | -    | 2.95 |
| 61 | 1.79 | -  | 2.45 | 1.01 | 6.17 | 2.26 | -    | 2.94 |
| 62 | 1.80 | -  | 2.45 | 1.02 | 6.17 | 2.26 | -    | 2.94 |
| 63 | 1.80 | -  | 2.45 | 1.02 | 6.17 | 2.25 | -    | 2.94 |
| 64 | 1.78 | -  | 2.46 | 1.03 | 6.17 | 2.25 | -    | 2.94 |
| 65 | 1.76 | -  | 2.45 | 1.03 | 6.17 | 2.24 | -    | 2.94 |
| 66 | 1.76 | -  | 2.46 | 1.04 | 6.18 | 2.24 | -    | 2.94 |
| 67 | 1.76 | -  | 2.46 | 1.04 | 6.18 | 2.23 | -    | 2.95 |
| 68 | 1.77 | -  | 2.46 | 1.05 | 6.17 | 2.23 | -    | 2.95 |
| 69 | 1.77 | -  | 2.46 | 1.06 | 6.17 | 2.23 | -    | 2.95 |
| 70 | 1.77 | -  | 2.47 | 1.06 | 6.18 | 2.22 | -    | 2.95 |
| 71 | 1.77 | -  | 2.47 | 1.07 | 6.18 | 2.22 | -    | 2.95 |
| 72 | 1.77 | -  | 2.47 | 1.07 | 6.18 | 2.22 | -    | 2.95 |
| 73 | 1.76 | -  | 2.47 | 1.07 | 6.18 | 2.21 | -    | 2.95 |
| 74 | 1.75 | -  | 2.47 | 1.08 | 6.18 | 2.21 | -    | 2.95 |
| 75 | 1.75 | -  | 2.47 | 1.09 | 6.18 | 2.21 | -    | 2.95 |
| 76 | 1.75 | -  | 2.48 | 1.09 | 6.18 | 2.20 | -    | 2.96 |

|     |      |      |      |      |      |      |   |      |
|-----|------|------|------|------|------|------|---|------|
| 77  | 1.75 | -    | 2.48 | 1.09 | 6.17 | 2.20 | - | 2.96 |
| 78  | 1.75 | -    | 2.48 | 1.10 | 6.18 | 2.20 | - | 2.95 |
| 79  | 1.75 | -    | 2.48 | 1.10 | 6.17 | 2.20 | - | 2.96 |
| 80  | 1.75 | -    | 2.48 | 1.11 | 6.17 | 2.19 | - | 2.96 |
| 81  | 1.74 | -    | 2.48 | 1.11 | 6.17 | 2.19 | - | 2.95 |
| 82  | 1.74 | -    | 2.48 | 1.11 | 6.17 | 2.19 | - | 2.96 |
| 83  | 1.74 | -    | 2.49 | 1.12 | 6.17 | 2.18 | - | 2.96 |
| 84  | 1.73 | -    | 2.49 | 1.12 | 6.17 | 2.18 | - | 2.96 |
| 85  | 1.73 | -    | 2.49 | 1.13 | 6.17 | 2.18 | - | 2.96 |
| 86  | 1.72 | -    | 2.49 | 1.13 | 6.18 | 2.18 | - | 2.96 |
| 87  | 1.72 | -    | 2.49 | 1.14 | 6.17 | 2.17 | - | 2.96 |
| 88  | 1.71 | -    | 2.49 | 1.14 | 6.17 | 2.17 | - | 2.96 |
| 89  | 1.71 | -    | 2.49 | 1.15 | 6.16 | 2.17 | - | 2.96 |
| 90  | 1.71 | -    | 2.49 | 1.15 | 6.16 | 2.16 | - | 2.97 |
| 91  | 1.7  | -    | 2.49 | 1.16 | 6.16 | 2.16 | - | 2.96 |
| 92  | 1.69 | -    | 2.49 | 1.16 | 6.16 | 2.15 | - | 2.96 |
| 93  | 1.68 | -    | 2.49 | 1.16 | 6.16 | 2.15 | - | 2.96 |
| 94  | 1.67 | -    | 2.48 | 1.17 | 6.15 | 2.15 | - | 2.96 |
| 95  | 1.66 | -    | 2.50 | 1.17 | 6.15 | 2.15 | - | 2.96 |
| 96  | 1.64 | -    | 2.47 | 1.18 | 6.15 | 2.14 | - | 2.96 |
| 97  | 1.62 | -    | 2.46 | 1.18 | 6.15 | 2.14 | - | 2.96 |
| 98  | 1.60 | -    | 2.45 | 1.19 | 6.14 | 2.14 | - | 2.96 |
| 99  | 1.55 | -    | 2.43 | 1.19 | 6.14 | 2.14 | - | 2.96 |
| 100 | 1.51 | -    | 2.42 | 1.20 | 6.12 | 2.14 | - | 2.96 |
| 101 | 1.44 | -    | 2.40 | 1.21 | 6.11 | 2.13 | - | 2.96 |
| 102 | 1.34 | -    | 2.37 | 1.22 | 6.07 | 2.13 | - | 2.96 |
| 103 | 1.24 | -    | 2.35 | 1.23 | 6.05 | 2.13 | - | 2.96 |
| 104 | 1.14 | -    | 2.33 | 1.25 | 6.01 | 2.13 | - | 2.96 |
| 105 | 1.03 | -    | 2.30 | 1.26 | 5.97 | 2.12 | - | 2.96 |
| 106 | -    | -    | 2.28 | 1.27 | 5.91 | 2.12 | - | 2.96 |
| 107 | -    | -    | 2.25 | 1.28 | 5.84 | 2.10 | - | 2.95 |
| 108 | -    | -    | 2.22 | 1.29 | 5.78 | 2.08 | - | 2.95 |
| 109 | -    | -    | 2.19 | 1.30 | 5.73 | 2.06 | - | 2.95 |
| 110 | -    | 1.11 | 2.17 | 1.30 | 5.68 | 2.04 | - | 2.95 |
| 111 | -    | 1.20 | 2.14 | 1.31 | 5.63 | 2.02 | - | 2.94 |
| 112 | -    | 1.29 | 2.12 | 1.31 | 5.57 | 2.00 | - | 2.94 |
| 113 | -    | 1.37 | 2.10 | 1.31 | 5.54 | 1.98 | - | 2.94 |
| 114 | -    | 1.45 | 2.09 | 1.32 | 5.49 | 1.97 | - | 2.94 |
| 115 | -    | 1.51 | 2.08 | 1.32 | 5.49 | 1.96 | - | 2.94 |
| 116 | -    | 1.57 | 2.06 | 1.32 | 5.45 | 1.95 | - | 2.93 |
| 117 | -    | 1.61 | 2.06 | 1.32 | 5.42 | 1.94 | - | 2.93 |
| 118 | -    | 1.65 | 2.06 | 1.32 | 5.42 | 1.94 | - | 2.93 |
| 119 | -    | 1.68 | 2.06 | 1.32 | 5.4  | 1.93 | - | 2.93 |
| 120 | -    | 1.70 | 2.05 | 1.32 | 5.39 | 1.93 | - | 2.93 |
| 121 | -    | 1.71 | 2.05 | 1.32 | 5.39 | 1.93 | - | 2.93 |
| 122 | -    | 1.72 | 2.05 | 1.33 | 5.39 | 1.93 | - | 2.94 |
| 123 | -    | 1.73 | 2.06 | 1.33 | 5.37 | 1.93 | - | 2.94 |
| 124 | -    | 1.74 | 2.05 | 1.33 | 5.37 | 1.93 | - | 2.94 |
| 125 | -    | 1.75 | 2.06 | 1.33 | 5.37 | 1.93 | - | 2.94 |
| 126 | -    | 1.76 | 2.06 | 1.33 | 5.37 | 1.92 | - | 2.94 |
| 127 | -    | 1.76 | 2.06 | 1.34 | 5.38 | 1.92 | - | 2.94 |
| 128 | -    | 1.76 | 2.05 | 1.34 | 5.38 | 1.92 | - | 2.94 |
| 129 | -    | 1.76 | 2.05 | 1.34 | 5.38 | 1.92 | - | 2.95 |
| 130 | -    | 1.77 | 2.05 | 1.34 | 5.35 | 1.92 | - | 2.94 |
| 131 | -    | 1.77 | 2.05 | 1.34 | 5.34 | 1.92 | - | 2.94 |
| 132 | -    | 1.77 | 2.05 | 1.34 | 5.32 | 1.92 | - | 2.94 |
| 133 | -    | 1.78 | 2.06 | 1.34 | 5.34 | 1.91 | - | 2.94 |
| 134 | -    | 1.78 | 2.05 | 1.34 | 5.33 | 1.91 | - | 2.95 |

|     |    |      |      |      |      |      |    |      |
|-----|----|------|------|------|------|------|----|------|
| 135 | -- | 1.78 | 2.05 | 1.34 | 5.33 | 1.91 | -- | 2.94 |
| 136 | -- | 1.78 | 2.05 | 1.34 | 5.33 | 1.91 | -- | 2.94 |
| 137 | -- | 1.78 | 2.05 | 1.34 | 5.33 | 1.91 | -- | 2.94 |
| 138 | -- | 1.78 | 2.05 | 1.34 | 5.33 | 1.91 | -- | 2.94 |
| 139 | -- | 1.78 | 2.05 | 1.34 | 5.33 | 1.91 | -- | 2.94 |
| 140 | -- | 1.78 | 2.05 | 1.34 | 5.33 | 1.91 | -- | 2.94 |
| 141 | -- | 1.79 | 2.05 | 1.34 | 5.33 | 1.91 | -- | 2.94 |
| 142 | -- | 1.79 | 2.05 | 1.34 | 5.33 | 1.91 | -- | 2.94 |
| 143 | -- | 1.79 | 2.05 | 1.34 | 5.33 | 1.91 | -- | 2.94 |
| 144 | -- | 1.79 | 2.05 | 1.34 | 5.33 | 1.91 | -- | 2.94 |
| 145 | -- | 1.79 | 2.05 | 1.34 | 5.33 | 1.91 | -- | 2.94 |
| 146 | -- | 1.79 | 2.05 | 1.35 | 5.33 | 1.91 | -- | 2.94 |
| 147 | -- | 1.79 | 2.05 | 1.35 | 5.33 | 1.91 | -- | 2.94 |
| 148 | -- | 1.79 | 2.05 | 1.35 | 5.33 | 1.91 | -- | 2.94 |
| 149 | -- | 1.79 | 2.05 | 1.35 | 5.33 | 1.91 | -- | 2.94 |
| 150 | -- | 1.79 | 2.05 | 1.35 | 5.33 | 1.91 | -- | 2.94 |

**Table S 34.** ELF basin populations for the IRC corresponding to **TS4b**.

|    | V(C2,C3) | V(C3,C6) | V(C6,C8) | V(C7,Br) | V(O1) | V(C6,C7) | V(N,Br) | V(N) |
|----|----------|----------|----------|----------|-------|----------|---------|------|
| 1  | 1.85     | -        | 2.17     | -        | 6.19  | 3.38     | 1.27    | 1.88 |
| 2  | 1.85     | -        | 2.17     | -        | 6.20  | 3.38     | 1.28    | 1.89 |
| 3  | 1.85     | -        | 2.17     | -        | 6.20  | 3.38     | 1.27    | 1.88 |
| 4  | 1.85     | -        | 2.17     | -        | 6.20  | 3.38     | 1.28    | 1.88 |
| 5  | 1.85     | -        | 2.17     | -        | 6.19  | 3.38     | 1.28    | 1.88 |
| 6  | 1.85     | -        | 2.17     | -        | 6.19  | 3.38     | 1.28    | 1.87 |
| 7  | 1.85     | -        | 2.17     | -        | 6.21  | 3.38     | 1.28    | 1.87 |
| 8  | 1.85     | -        | 2.17     | -        | 6.19  | 3.38     | 1.27    | 1.87 |
| 9  | 1.85     | -        | 2.18     | -        | 6.19  | 3.38     | 1.27    | 1.88 |
| 10 | 1.85     | -        | 2.17     | -        | 6.19  | 3.38     | 1.27    | 1.88 |
| 11 | 1.85     | -        | 2.17     | -        | 6.19  | 3.38     | 1.27    | 1.88 |
| 12 | 1.85     | -        | 2.17     | -        | 6.20  | 3.38     | 1.28    | 1.89 |
| 13 | 1.85     | -        | 2.17     | -        | 6.20  | 3.38     | 1.27    | 1.88 |
| 14 | 1.85     | -        | 2.17     | -        | 6.20  | 3.38     | 1.28    | 1.88 |
| 15 | 1.85     | -        | 2.17     | -        | 6.19  | 3.38     | 1.28    | 1.88 |
| 16 | 1.85     | -        | 2.17     | -        | 6.19  | 3.38     | 1.28    | 1.87 |
| 17 | 1.85     | -        | 2.17     | -        | 6.21  | 3.38     | 1.28    | 1.87 |
| 18 | 1.85     | -        | 2.17     | -        | 6.19  | 3.38     | 1.27    | 1.87 |
| 19 | 1.85     | -        | 2.18     | -        | 6.19  | 3.38     | 1.27    | 1.88 |
| 20 | 1.85     | -        | 2.17     | -        | 6.19  | 3.38     | 1.27    | 1.88 |
| 21 | 1.85     | -        | 2.17     | -        | 6.19  | 3.38     | 1.27    | 1.88 |
| 22 | 1.85     | -        | 2.17     | -        | 6.20  | 3.38     | 1.28    | 1.89 |
| 23 | 1.85     | -        | 2.17     | -        | 6.20  | 3.38     | 1.27    | 1.88 |
| 24 | 1.85     | -        | 2.17     | -        | 6.20  | 3.38     | 1.28    | 1.88 |
| 25 | 1.85     | -        | 2.17     | -        | 6.19  | 3.38     | 1.28    | 1.88 |
| 26 | 1.85     | -        | 2.17     | -        | 6.19  | 3.38     | 1.28    | 1.87 |
| 27 | 1.85     | -        | 2.17     | -        | 6.21  | 3.38     | 1.28    | 1.87 |
| 28 | 1.85     | -        | 2.17     | -        | 6.19  | 3.38     | 1.27    | 1.87 |
| 29 | 1.85     | -        | 2.18     | -        | 6.19  | 3.38     | 1.27    | 1.88 |
| 30 | 1.85     | -        | 2.17     | -        | 6.19  | 3.38     | 1.27    | 1.88 |
| 31 | 1.85     | -        | 2.17     | -        | 6.19  | 3.38     | 1.27    | 1.88 |
| 32 | 1.85     | -        | 2.17     | -        | 6.20  | 3.38     | 1.28    | 1.89 |
| 33 | 1.85     | -        | 2.17     | -        | 6.20  | 3.38     | 1.27    | 1.88 |

|    |      |      |      |      |      |      |      |      |
|----|------|------|------|------|------|------|------|------|
| 34 | 1.85 | -    | 2.17 | -    | 6.20 | 3.38 | 1.28 | 1.88 |
| 35 | 1.85 | -    | 2.17 | -    | 6.19 | 3.38 | 1.28 | 1.88 |
| 36 | 1.85 | -    | 2.17 | -    | 6.19 | 3.38 | 1.28 | 1.87 |
| 37 | 1.85 | -    | 2.17 | -    | 6.21 | 3.38 | 1.28 | 1.87 |
| 38 | 1.85 | -    | 2.17 | -    | 6.19 | 3.38 | 1.27 | 1.87 |
| 39 | 1.85 | -    | 2.18 | -    | 6.19 | 3.38 | 1.27 | 1.88 |
| 40 | 1.85 | -    | 2.17 | -    | 6.19 | 3.38 | 1.27 | 1.88 |
| 41 | 1.85 | -    | 2.17 | -    | 6.19 | 3.38 | 1.27 | 1.88 |
| 42 | 1.85 | -    | 2.17 | -    | 6.20 | 3.37 | 1.28 | 1.89 |
| 43 | 1.85 | -    | 2.17 | -    | 6.20 | 3.37 | 1.27 | 1.88 |
| 44 | 1.85 | -    | 2.17 | -    | 6.20 | 3.38 | 1.28 | 1.88 |
| 45 | 1.85 | -    | 2.17 | -    | 6.19 | 3.36 | 1.28 | 1.88 |
| 46 | 1.85 | -    | 2.17 | -    | 6.19 | 3.36 | 1.28 | 1.87 |
| 47 | 1.85 | -    | 2.17 | -    | 6.21 | 3.35 | 1.28 | 1.87 |
| 48 | 1.85 | -    | 2.17 | -    | 6.19 | 3.36 | 1.27 | 1.87 |
| 49 | 1.85 | -    | 2.18 | -    | 6.19 | 3.35 | 1.27 | 1.88 |
| 50 | 1.85 | -    | 2.17 | -    | 6.19 | 3.35 | 1.27 | 1.88 |
| 51 | 1.85 | -    | 2.17 | -    | 6.20 | 3.34 | 1.25 | 1.88 |
| 52 | 1.85 | -    | 2.17 | -    | 6.20 | 3.34 | 1.25 | 1.88 |
| 53 | 1.85 | -    | 2.18 | -    | 6.19 | 3.33 | 1.24 | 1.88 |
| 54 | 1.84 | -    | 2.18 | -    | 6.20 | 3.32 | 1.24 | 1.88 |
| 55 | 1.84 | -    | 2.18 | -    | 6.18 | 3.3  | 1.24 | 1.88 |
| 56 | 1.84 | -    | 2.19 | -    | 6.18 | 3.29 | 1.22 | 1.88 |
| 57 | 1.84 | -    | 2.19 | -    | 6.18 | 3.26 | 1.22 | 1.89 |
| 58 | 1.84 | -    | 2.20 | -    | 6.18 | 3.23 | 1.21 | 1.89 |
| 59 | 1.83 | -    | 2.20 | -    | 6.18 | 3.21 | 1.20 | 1.89 |
| 60 | 1.83 | -    | 2.20 | -    | 6.19 | 3.18 | 1.17 | 1.89 |
| 61 | 1.83 | -    | 2.21 | -    | 6.19 | 3.15 | 1.16 | 1.89 |
| 62 | 1.82 | -    | 2.22 | -    | 6.19 | 3.12 | 1.13 | 1.89 |
| 63 | 1.82 | -    | 2.23 | -    | 6.18 | 3.09 | -    | 3.00 |
| 64 | 1.81 | -    | 2.23 | -    | 6.18 | 3.07 | -    | 2.98 |
| 65 | 1.80 | -    | 2.24 | 0.35 | 6.18 | 2.71 | -    | 2.95 |
| 66 | 1.80 | -    | 2.25 | 0.43 | 6.17 | 2.65 | -    | 2.93 |
| 67 | 1.79 | -    | 2.25 | 0.51 | 6.16 | 2.58 | -    | 2.92 |
| 68 | 1.78 | -    | 2.26 | 0.59 | 6.15 | 2.52 | -    | 2.93 |
| 69 | 1.77 | -    | 2.27 | 0.65 | 6.14 | 2.47 | -    | 2.93 |
| 70 | 1.76 | -    | 2.27 | 0.71 | 6.14 | 2.44 | -    | 2.94 |
| 71 | 1.75 | -    | 2.27 | 0.76 | 6.14 | 2.4  | -    | 2.95 |
| 72 | 1.74 | -    | 2.28 | 0.8  | 6.15 | 2.37 | -    | 2.94 |
| 73 | 1.74 | -    | 2.29 | 0.84 | 6.15 | 2.34 | -    | 2.95 |
| 74 | 1.72 | -    | 2.29 | 0.88 | 6.15 | 2.32 | -    | 2.95 |
| 75 | 1.71 | -    | 2.29 | 0.91 | 6.15 | 2.30 | -    | 2.95 |
| 76 | 1.72 | -    | 2.29 | 0.93 | 6.15 | 2.29 | -    | 2.96 |
| 77 | 1.62 | -    | 2.29 | 0.98 | 6.12 | 2.27 | -    | 2.95 |
| 78 | 1.63 | -    | 2.29 | 0.98 | 6.14 | 2.26 | -    | 2.96 |
| 79 | 1.54 | -    | 2.28 | 1.02 | 6.13 | 2.24 | -    | 2.95 |
| 80 | 1.40 | -    | 2.27 | 1.08 | 6.09 | 2.22 | -    | 2.95 |
| 81 | 1.25 | -    | 2.26 | 1.12 | 6.03 | 2.21 | -    | 2.94 |
| 82 | 1.11 | -    | 2.26 | 1.18 | 5.97 | 2.19 | -    | 2.94 |
| 83 | -    | -    | 2.24 | 1.22 | 5.89 | 2.17 | -    | 2.94 |
| 84 | -    | -    | 2.21 | 1.26 | 5.79 | 2.14 | -    | 2.94 |
| 85 | -    | 1.02 | 2.18 | 1.29 | 5.71 | 2.09 | -    | 2.93 |
| 86 | -    | 1.16 | 2.15 | 1.31 | 5.61 | 2.04 | -    | 2.93 |
| 87 | -    | 1.30 | 2.13 | 1.32 | 5.56 | 2.01 | -    | 2.93 |
| 88 | -    | 1.43 | 2.10 | 1.33 | 5.50 | 1.97 | -    | 2.92 |
| 89 | -    | 1.53 | 2.08 | 1.33 | 5.46 | 1.96 | -    | 2.92 |
| 90 | -    | 1.61 | 2.07 | 1.34 | 5.42 | 1.95 | -    | 2.92 |
| 91 | -    | 1.66 | 2.06 | 1.33 | 5.41 | 1.94 | -    | 2.92 |

|     |   |      |      |      |      |      |   |      |
|-----|---|------|------|------|------|------|---|------|
| 92  | - | 1.70 | 2.06 | 1.33 | 5.40 | 1.94 | - | 2.93 |
| 93  | - | 1.72 | 2.06 | 1.34 | 5.39 | 1.93 | - | 2.93 |
| 94  | - | 1.74 | 2.06 | 1.34 | 5.38 | 1.93 | - | 2.94 |
| 95  | - | 1.75 | 2.07 | 1.34 | 5.37 | 1.92 | - | 2.94 |
| 96  | - | 1.76 | 2.07 | 1.34 | 5.37 | 1.92 | - | 2.94 |
| 97  | - | 1.76 | 2.07 | 1.34 | 5.36 | 1.92 | - | 2.94 |
| 98  | - | 1.77 | 2.06 | 1.34 | 5.36 | 1.92 | - | 2.95 |
| 99  | - | 1.78 | 2.06 | 1.35 | 5.36 | 1.91 | - | 2.94 |
| 100 | - | 1.78 | 2.06 | 1.35 | 5.35 | 1.91 | - | 2.95 |
| 101 | - | 1.79 | 2.06 | 1.35 | 5.31 | 1.91 | - | 2.94 |
| 102 | - | 1.79 | 2.06 | 1.35 | 5.29 | 1.90 | - | 2.94 |
| 103 | - | 1.80 | 2.07 | 1.35 | 5.31 | 1.90 | - | 2.95 |
| 104 | - | 1.80 | 2.07 | 1.35 | 5.32 | 1.90 | - | 2.96 |
| 105 | - | 1.80 | 2.07 | 1.35 | 5.32 | 1.90 | - | 2.95 |
| 106 | - | 1.80 | 2.06 | 1.36 | 5.33 | 1.90 | - | 2.96 |
| 107 | - | 1.81 | 2.06 | 1.36 | 5.32 | 1.90 | - | 2.95 |
| 108 | - | 1.81 | 2.06 | 1.36 | 5.31 | 1.89 | - | 2.96 |
| 109 | - | 1.81 | 2.06 | 1.36 | 5.30 | 1.89 | - | 2.96 |
| 110 | - | 1.81 | 2.06 | 1.36 | 5.29 | 1.88 | - | 2.97 |
| 111 | - | 1.81 | 2.06 | 1.36 | 5.29 | 1.88 | - | 2.96 |
| 112 | - | 1.81 | 2.06 | 1.36 | 5.28 | 1.88 | - | 2.97 |
| 113 | - | 1.81 | 2.06 | 1.36 | 5.26 | 1.88 | - | 2.96 |
| 114 | - | 1.82 | 2.06 | 1.35 | 5.25 | 1.88 | - | 2.97 |
| 115 | - | 1.82 | 2.06 | 1.36 | 5.26 | 1.88 | - | 2.96 |
| 116 | - | 1.82 | 2.06 | 1.36 | 5.26 | 1.88 | - | 2.97 |
| 117 | - | 1.82 | 2.06 | 1.36 | 5.25 | 1.87 | - | 2.98 |
| 118 | - | 1.82 | 2.06 | 1.36 | 5.26 | 1.87 | - | 2.98 |
| 119 | - | 1.82 | 2.06 | 1.36 | 5.27 | 1.87 | - | 2.98 |
| 120 | - | 1.83 | 2.06 | 1.36 | 5.26 | 1.87 | - | 2.98 |
| 121 | - | 1.83 | 2.06 | 1.36 | 5.24 | 1.87 | - | 2.97 |
| 122 | - | 1.82 | 2.05 | 1.36 | 5.24 | 1.87 | - | 2.97 |
| 123 | - | 1.83 | 2.05 | 1.36 | 5.25 | 1.87 | - | 2.98 |
| 124 | - | 1.83 | 2.05 | 1.36 | 5.24 | 1.87 | - | 2.98 |
| 125 | - | 1.83 | 2.06 | 1.36 | 5.25 | 1.87 | - | 2.99 |
| 126 | - | 1.83 | 2.05 | 1.36 | 5.25 | 1.87 | - | 2.99 |
| 127 | - | 1.83 | 2.05 | 1.36 | 5.25 | 1.86 | - | 2.99 |
| 128 | - | 1.83 | 2.05 | 1.37 | 5.25 | 1.86 | - | 2.99 |
| 129 | - | 1.84 | 2.05 | 1.36 | 5.24 | 1.87 | - | 2.99 |
| 130 | - | 1.84 | 2.05 | 1.37 | 5.25 | 1.86 | - | 2.98 |
| 131 | - | 1.84 | 2.05 | 1.37 | 5.24 | 1.86 | - | 2.98 |
| 132 | - | 1.84 | 2.05 | 1.37 | 5.24 | 1.86 | - | 2.98 |
| 133 | - | 1.84 | 2.05 | 1.37 | 5.24 | 1.86 | - | 2.99 |
| 134 | - | 1.84 | 2.05 | 1.37 | 5.23 | 1.86 | - | 2.99 |
| 135 | - | 1.84 | 2.05 | 1.37 | 5.23 | 1.86 | - | 2.99 |
| 136 | - | 1.84 | 2.05 | 1.37 | 5.23 | 1.86 | - | 2.99 |
| 137 | - | 1.84 | 2.05 | 1.37 | 5.23 | 1.86 | - | 2.99 |
| 138 | - | 1.84 | 2.05 | 1.37 | 5.21 | 1.86 | - | 2.98 |
| 139 | - | 1.84 | 2.04 | 1.37 | 5.21 | 1.86 | - | 2.99 |
| 140 | - | 1.84 | 2.05 | 1.37 | 5.21 | 1.87 | - | 2.99 |
| 141 | - | 1.84 | 2.05 | 1.36 | 5.20 | 1.86 | - | 2.99 |
| 142 | - | 1.84 | 2.05 | 1.37 | 5.20 | 1.86 | - | 2.99 |
| 143 | - | 1.84 | 2.05 | 1.37 | 5.21 | 1.87 | - | 2.99 |
| 144 | - | 1.84 | 2.05 | 1.37 | 5.20 | 1.87 | - | 2.99 |
| 145 | - | 1.84 | 2.05 | 1.37 | 5.21 | 1.86 | - | 2.99 |
| 146 | - | 1.84 | 2.04 | 1.37 | 5.20 | 1.86 | - | 2.99 |
| 147 | - | 1.84 | 2.04 | 1.37 | 5.19 | 1.86 | - | 2.99 |
| 148 | - | 1.84 | 2.04 | 1.37 | 5.19 | 1.86 | - | 2.99 |
| 149 | - | 1.84 | 2.05 | 1.37 | 5.19 | 1.86 | - | 2.99 |

|     |   |      |      |      |      |      |   |      |
|-----|---|------|------|------|------|------|---|------|
| 150 | - | 1.85 | 2.04 | 1.37 | 5.19 | 1.86 | - | 2.99 |
| 151 | - | 1.84 | 2.04 | 1.36 | 5.19 | 1.86 | - | 2.99 |
| 152 | - | 1.84 | 2.04 | 1.36 | 5.19 | 1.86 | - | 2.99 |
| 153 | - | 1.84 | 2.04 | 1.37 | 5.20 | 1.87 | - | 2.99 |
| 154 | - | 1.84 | 2.04 | 1.36 | 5.20 | 1.87 | - | 2.99 |
| 155 | - | 1.85 | 2.04 | 1.36 | 5.19 | 1.86 | - | 2.99 |
| 156 | - | 1.85 | 2.04 | 1.36 | 5.20 | 1.87 | - | 3.00 |
| 157 | - | 1.85 | 2.04 | 1.36 | 5.20 | 1.87 | - | 2.99 |
| 158 | - | 1.85 | 2.04 | 1.36 | 5.20 | 1.87 | - | 2.99 |
| 159 | - | 1.84 | 2.04 | 1.36 | 5.20 | 1.87 | - | 2.99 |
| 160 | - | 1.84 | 2.04 | 1.37 | 5.20 | 1.87 | - | 2.99 |

### Stabilization of the intermediate

A stepwise process was achieved by placing a dimethylamino group instead the aromatic ring. In this case a stable intermediate iminium ion was located. From this intermediate, paths towards an epoxide and a cyclopentanone were calculated (Scheme S 15).

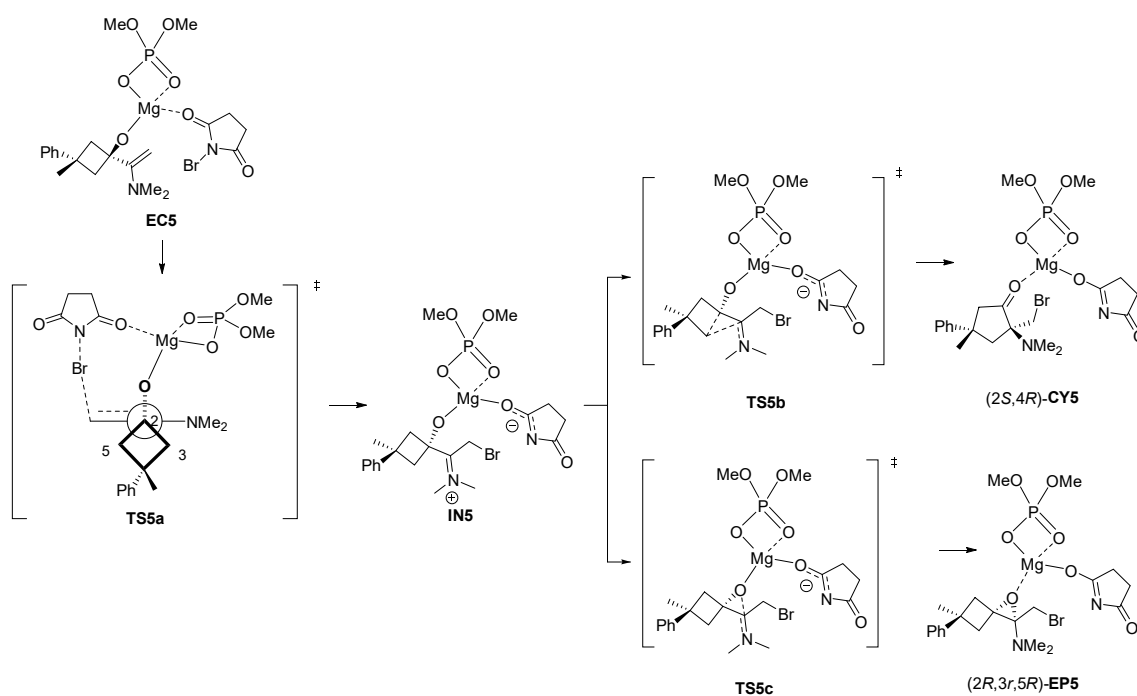

**Scheme S 15.** Stabilization of intermediate as iminium ion. Only the attack by one face of the iminium ion has been calculated.

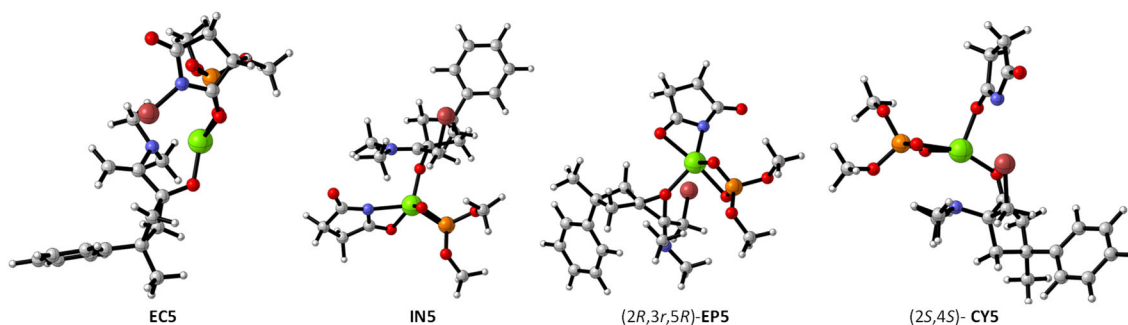

**Figure S 83.** Optimized (wb97xd/def2SVP) geometries of encounter complex **EC5**, intermediate **IN5**, epoxide (*2R,3r,5R*)-**EP5** and cyclopentanone (*2S,4R*)-**CY5**

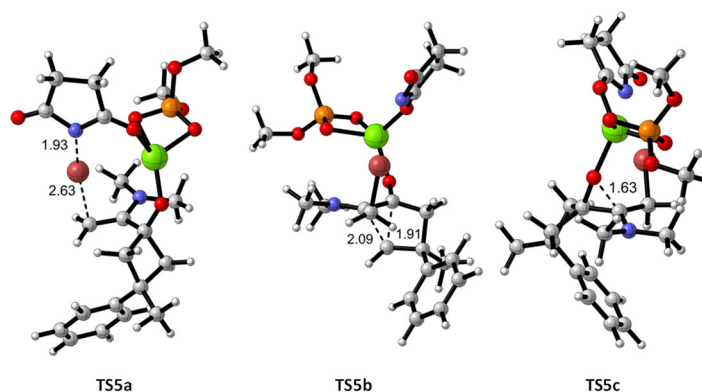

**Figure S 84.** Optimized (wb97xd/def2SVP) geometries of transition structures **TS5a**, **TS5b** and **TS5c**.

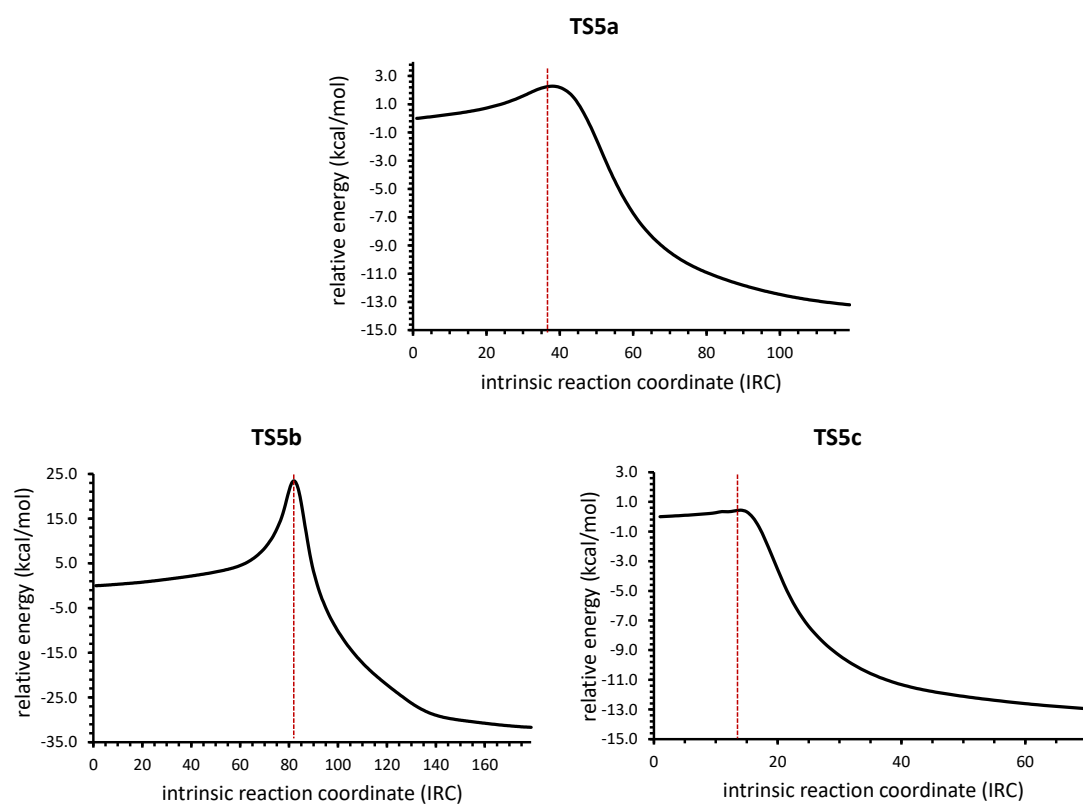

**Figure S 85.** IRCs (wb97xd/def2svp) corresponding to transition structures **TS5a**, **TS5b** and **TS5c**.

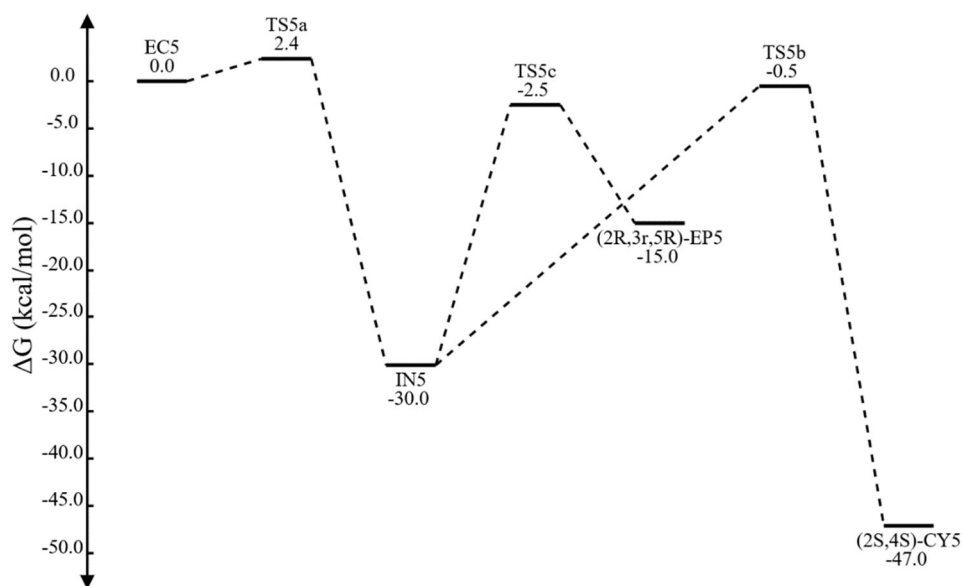

**Figure S 86.** Energy profiles (wb97xd/def2tzvp/pcm=toluene)//wb97xd/def2svp) for the different pathways from **EC5** to **EP5** and **CY5**. Relative free energies are given in kcal/mol.

**Table S 35.** Calculated (wb97xd/def2tzvp/pcm=toluene)//wb97xd/def2svp) absolute (hartree) and relative (kcal/mol) energies for the transformation of **EC5** into **EP5** and **CY5**.

|                       | $E_0$        | $\Delta E_0$ | G            | $\Delta G$ | im. freq |
|-----------------------|--------------|--------------|--------------|------------|----------|
| <b>EC5</b>            | -4569.880067 | 0.0          | -4569.974554 | 0.0        |          |
| <b>TS5a</b>           | -4569.876584 | 2.2          | -4569.970712 | 2.4        | -118.0   |
| <b>IN5</b>            | -4569.925222 | -28.3        | -4570.022437 | -30.0      |          |
| <b>TS5b</b>           | -4569.875033 | 3.2          | -4569.974764 | -0.1       | -485.1   |
| <b>TS5c</b>           | -4569.884170 | -2.6         | -4569.978612 | -2.5       | -225.6   |
| <b>(2S,4S)-CY5</b>    | -4569.955115 | -47.1        | -4570.049506 | -47.0      |          |
| <b>(2R,3r,5R)-EP5</b> | -4569.900108 | -12.6        | -4569.998385 | -15.0      |          |



## Real Model with Real Catalyst

Consideration of the chiral catalyst duplicates the approaches illustrated in Scheme S 14. We located 8 transition structures (TS2a1 and TS2a2 leading to isomeric epoxides and TS2b1, TS2b2, TS2c1, TS2c2, TS2d1 and TS2d2 leading to isomeric cyclopentanones) (Scheme S 16). The optimized structures are given in Figure S 87 and their absolute and relative energies in Table S 36.

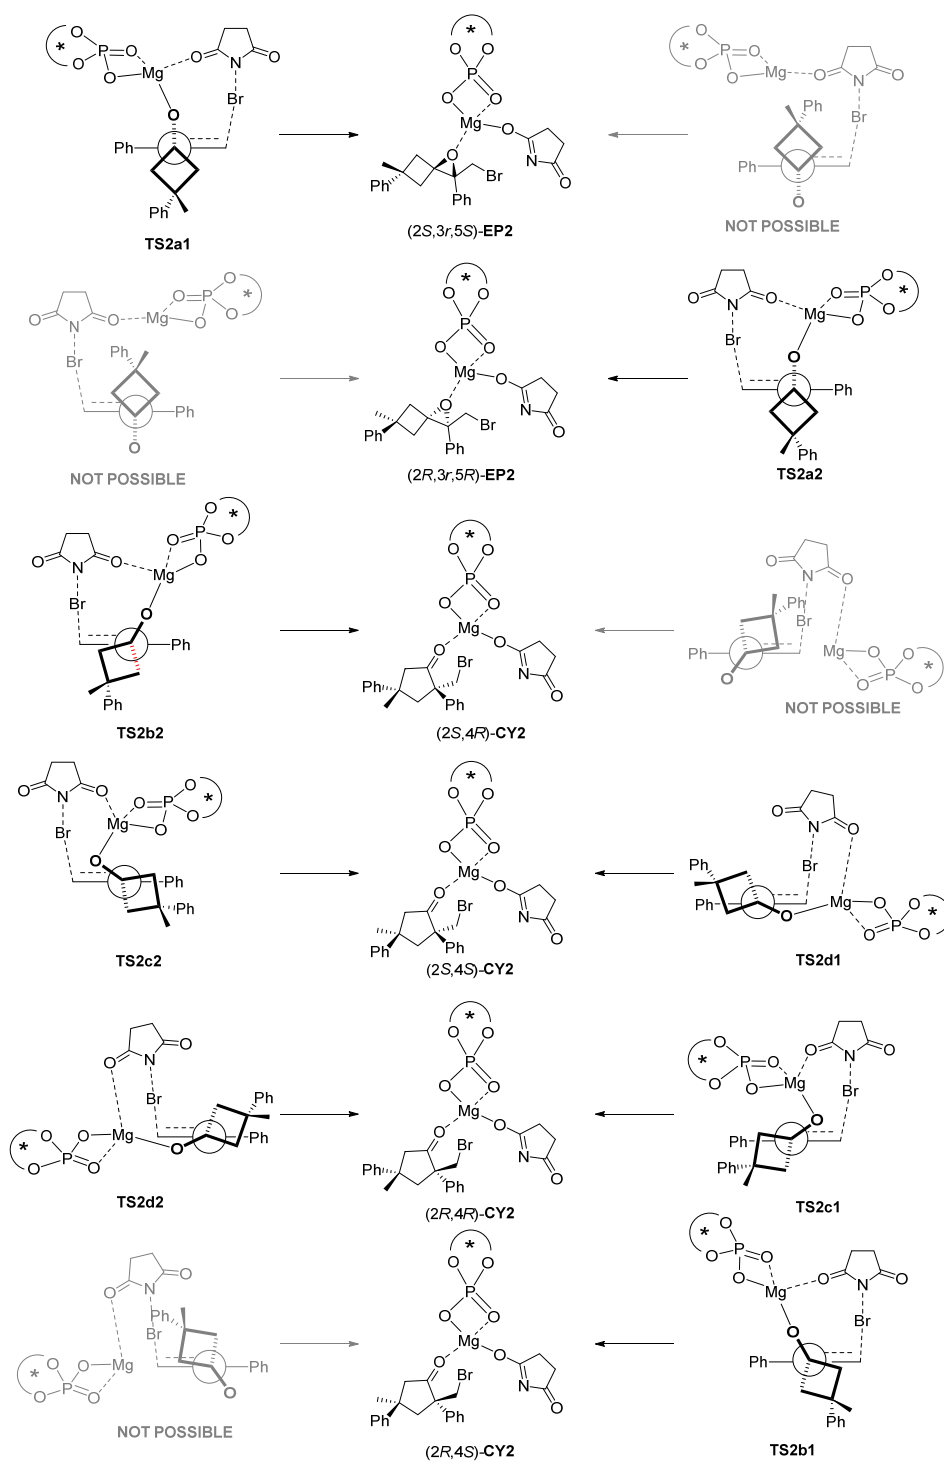

Scheme S 16. Approaches for the real model with the real catalyst.

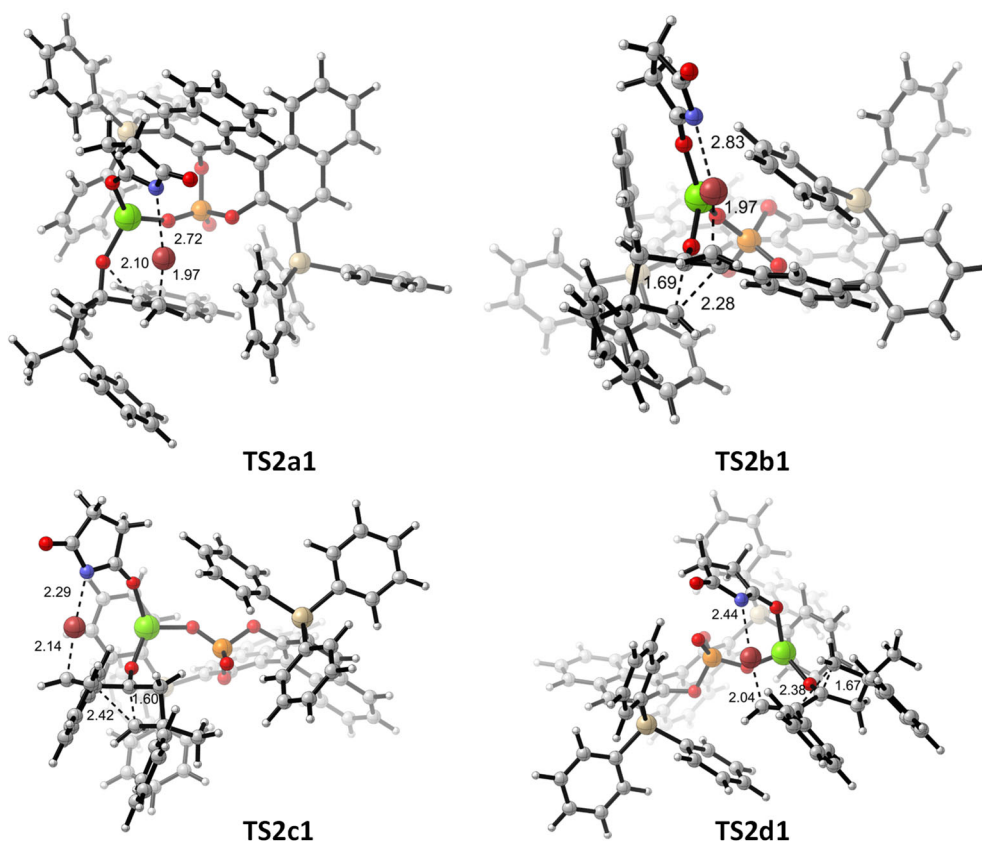

**Figure S 87.** Optimized (wb97xd/def2SVP:PM6) geometries of transition structures **TS2a1**, **TS2b1**, **TS2c1** and **TS2d1**.

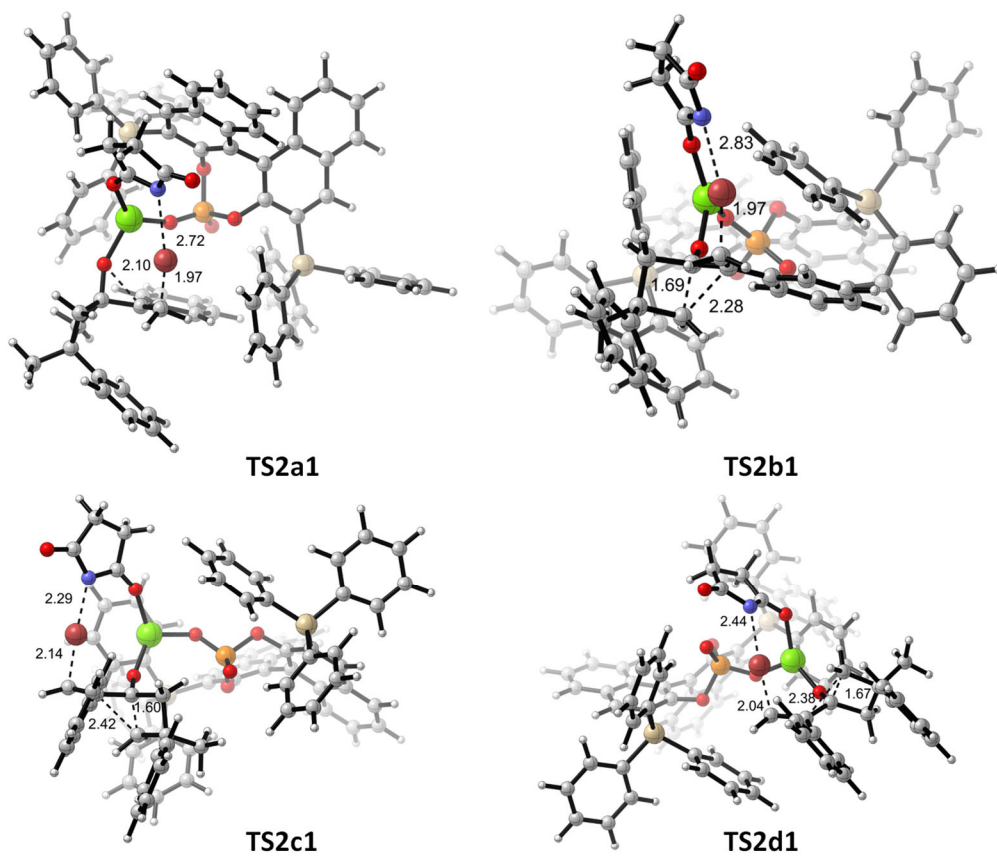

**Figure S 88.** Optimized (wb97xd/def2SVP:PM6) geometries of transition structures **TS2a2**, **TS2b2**, **TS2c2** and **TS2d2**.

**Table S 36.** Calculated (wb97xd/def2tzvp/pcm=toluene:PM6//wb97xd/def2svp:PM6) absolute (hartree) and relative (kcal/mol) energies for the of transition structures illustrated in Scheme S 16.

|                       | $E_0$        | $\Delta E_0^a$ | $\Delta\Delta E_0^b$ | G            | $\Delta G^a$ | $\Delta\Delta G^b$ | im. freq |
|-----------------------|--------------|----------------|----------------------|--------------|--------------|--------------------|----------|
| <b>ECr</b>            | -5355.664952 | 0.0            |                      | -5355.843317 | 0.0          |                    |          |
| <b>TS2a1</b>          | -5355.658142 | 4.3            | 0.0                  | -5355.831175 | 7.6          | 2.3                | -117.4   |
| <b>TS2b1</b>          | -5355.655543 | 5.9            | 1.6                  | -5355.834840 | 5.3          | 0.0                | -194.8   |
| <b>TS2c1</b>          | -5355.650568 | 9.0            | 4.8                  | -5355.827010 | 10.2         | 4.9                | -88.9    |
| <b>TS2d1</b>          | -5355.643397 | 13.5           | 9.3                  | -5355.821245 | 13.9         | 8.5                | -88.1    |
| <b>TS2a2</b>          | -5355.652947 | 7.5            | 3.3                  | -5355.827309 | 10.0         | 4.7                | -106.9   |
| <b>TS2b2</b>          | -5355.653358 | 7.3            | 3.0                  | -5355.829366 | 8.8          | 3.4                | -118.3   |
| <b>TS2c2</b>          | -5355.651228 | 8.6            | 4.3                  | -5355.827379 | 10.0         | 4.7                | -152.5   |
| <b>TS2d2</b>          | -5355.635444 | 18.5           | 14.2                 | -5355.809567 | 21.2         | 15.9               | -119.2   |
| <b>(2R,3r,5R)-EPr</b> | -5355.715864 | -31.9          |                      | -5355.888529 | -28.4        |                    |          |
| <b>(2S,3r,5S)-EPr</b> | -5355.675336 | -6.5           |                      | -5355.849791 | -4.1         |                    |          |
| <b>(2R,4R)-CYr</b>    | -5355.769241 | -65.4          |                      | -5355.942932 | -62.5        |                    |          |
| <b>(2R,4S)-CYr</b>    | -5355.768198 | -64.8          |                      | -5355.942795 | -62.4        |                    |          |
| <b>(2S,4R)-CYr</b>    | -5355.759003 | -59.0          |                      | -5355.934484 | -57.2        |                    |          |
| <b>(2S,4S)-CYr</b>    | -5355.753488 | -55.6          |                      | -5355.930652 | -54.8        |                    |          |

<sup>a</sup> Referred to **ECr**. <sup>b</sup> Referred to the minimum value of the transition structures

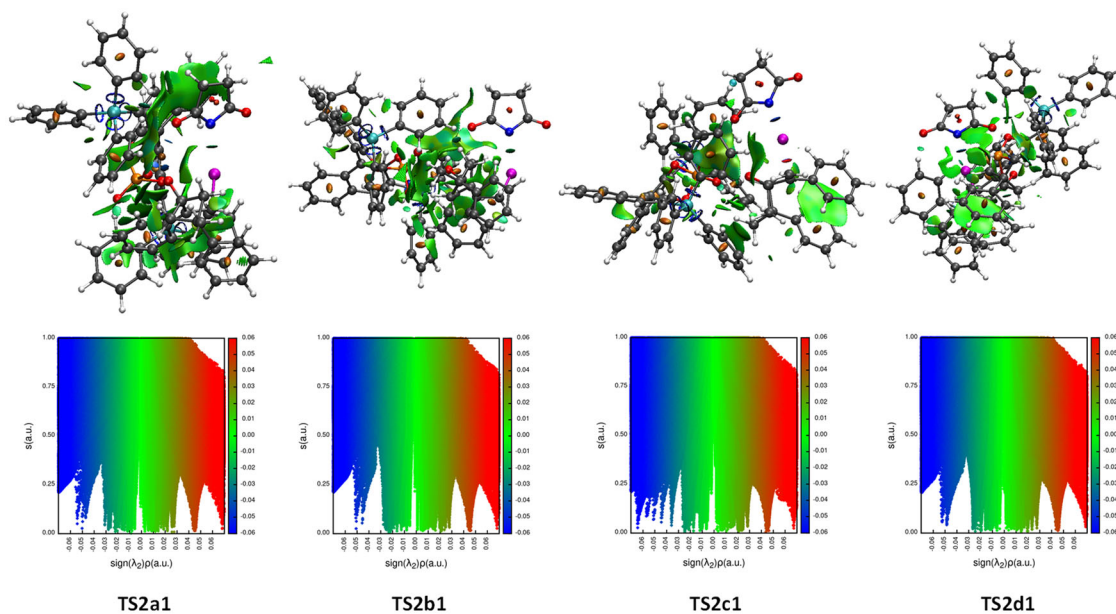

**Figure S 89.** NCI analysis for transition structures **TS2a1**, **TS2b1**, **TS2c1** and **TS2d1**. Top: Isosurfaces. Bottom:  $s(\mathbf{r})$  against  $sign(\lambda_2)\rho(\mathbf{r})$  plots (see text).

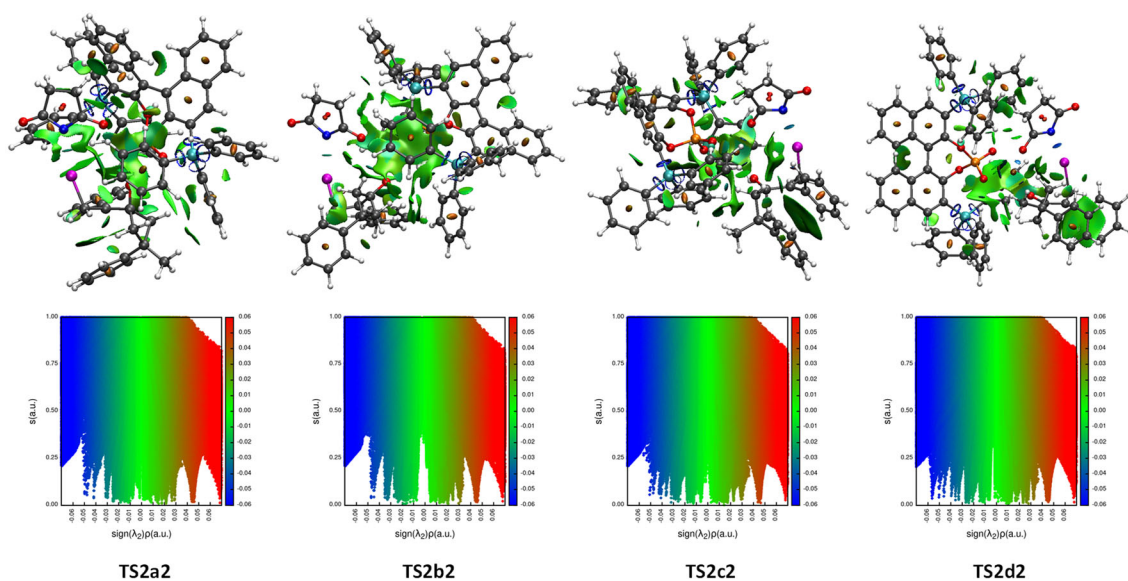

**Figure S 90.** NCI analysis for transition structures **TS2a2**, **TS2b2**, **TS2c2** and **TS2d2**. Top: Isosurfaces. Bottom:  $s(\mathbf{r})$  against  $sign(\lambda_2)\rho(\mathbf{r})$  plots (see text).

**Table S 37** Integration over the volumes of  $sign(\lambda_2)\rho(\mathbf{n})$  for  $n=2.5$  according to ref. 37 for **TS2a1**, **TS2b1**, **TS2c1** and **TS2d1**

| interval             | <b>TS2a1</b> | <b>TS2b1</b> | <b>TS2c1</b> | <b>TS2d1</b> |
|----------------------|--------------|--------------|--------------|--------------|
| <b>all</b>           | -8.22861886  | -8.24809882  | -8.23758177  | -8.24182234  |
| <b>-1.0 to -0.02</b> | -0.64825856  | -0.65183371  | -0.65442657  | -0.65456785  |
| <b>-0.02 to 0.02</b> | 0.01078311   | 0.01062379   | 0.01121693   | 0.01112437   |
| <b>0.02 to 1.0</b>   | 0.80472338   | 0.80664636   | 0.80362521   | 0.80557497   |

<sup>a</sup> The interval  $[-0.1, -0.02]$  gives information about strong NCI (H-bond, halogen, etc.). The interval  $[-0.02, 0.02]$  gives information about van der Waals interactions. The interval  $[0.02, 1.00]$  gives information about steric clashes.

**Table S 38** Integration over the volumes of  $sign(\lambda_2)\rho(\mathbf{n})$  for  $n=2.5$  according to ref. 37 for **TS2a2**, **TS2b2**, **TS2c2** and **TS2d2**.

| interval             | <b>TS2a2</b> | <b>TS2b2</b> | <b>TS2c2</b> | <b>TS2d2</b> |
|----------------------|--------------|--------------|--------------|--------------|
| <b>all</b>           | -8.24209417  | -8.23800821  | -8.24454098  | -8.23658102  |
| <b>-1.0 to -0.02</b> | -0.65124256  | -0.65469843  | -0.65292160  | -0.65315603  |
| <b>-0.02 to 0.02</b> | 0.01049493   | 0.01117797   | 0.01144069   | 0.01108816   |
| <b>0.02 to 1.0</b>   | 0.80401630   | 0.80813914   | 0.80717058   | 0.80439725   |

<sup>a</sup> The interval  $[-0.1, -0.02]$  gives information about strong NCI (H-bond, halogen, etc.). The interval  $[-0.02, 0.02]$  gives information about van der Waals interactions. The interval  $[0.02, 1.00]$  gives information about steric clashes.

## Molecular Dynamic Simulations

The following file corresponds to the “progdyn.conf” file used in the Progdyn script package. <sup>[Error! Marcador no definido.]</sup> It contains information about the level of theory, charge, multiplicity, and all other inputs for a Gaussian electronic structure calculation. Transition structure **TS2b**, calculated at the  $\omega$ B97XD/def2svp level of theory was used as the input structure for the molecular dynamics simulations.

--- Start of file

```
#This is the configuration file for PROGDYN. This file is read by progdynstarterHP and
# the awk programs proggenHP, prog1stpoint, prog2ndpoint, and progdynb.
#The programs won't read anything past the first blank line,
#and this file must end with a blank line.
#The program has a number of default values but they are unlikely to be what you want.
#Do not delete lines - rather, comment out lines for unwanted options.
#The values here are read repeatedly and most can be changed in the middle of running jobs
***The keywords are case sensitive. The following keywords should always be defined:***
***method, charge, multiplicity, memory, processors, title
*** method --The following word is copied exactly to the gaussian input file.
method wb97xd/def2svp
#To do a nonstandard route, make nonstandard 1. For normal calcs, use nonstandard 0 or else
leave it out.
#Then make a file called "nonstandard" containing the nonstandard route with no extra lines.
#nonstandard 0
# NMRoptions As is NMRtype=1 will add a section for an NMR calc at every NMRevery intervals.
If you want to combine the two use nonstandard
#NMRtype 1
#NMRmethod2 B97D/6-31G*
#NMRmethod LC-wPBE/6-31G*
#NMRmethod3 B3LYP/cc-pvtz
#NMRevery 4
#NMRrand 1
#NMRcc 1
#loadlimit 10.0
#geometry linear
rotationmode 1
*** method2 --The options here are restricted, unrestricted, and read. restricted is the default
#If the method is U..., put unrestricted here and the .com files will have in them guess=mix.
#If you put read here, the .com files will contain guess=tcheck, which sometimes makes things
faster, sometimes not.
#The use of read requires a specifically defined checkpoint file name using the keyword
checkpoint.
method2 restricted
charge 0
multiplicity 1
#onionchargemult 1 1
processors 16
*** memory --The following "word" is copied exactly to the gaussian input file after %mem=.
```

```

memory 8gb
**** killcheck and checkpoint -- You can use a specifically defined checkpoint file name by
putting
#the name after the keyword checkpoint. This is necessary if you use the read option with
method2.
#Defined checkpoint names are an unnecessary modest hassle and if you do not want to bother,
use killcheck 1
killcheck 1
#checkpoint g09.chk
**** diagnostics -- 0 prints out nothing extra, 1 (default) prints out extra stuff to a
#file "diagnostics", 2 adds more stuff, 3 adds velocities to a file "vellist"
#4 adds the apparent temperature to vellist, but this is meaningless with quasiclassical
calculations
diagnostics 4
**** title -- the title keyword must be followed by exactly four words (the first after title is
loaded by proganal)
title title CB08 TS1b model
**** initialdis -- 0 (default) turns off displacement of the normal modes, so that all trajectories
start from the same place
# and only the energies and signs of the motion in the modes are randomized
# 1 gives a flat distribution of displacements where all of the possible values are equally likely
# 2 (recommended) gives a QM-like gaussian distribution of displacements, so that
displacements in the middle are more likely that
# those at the end by 1/e
initialdis 0
**** timestep -- this is the time between points in the trajectory. Typical values would be 1E-
15 or 0.5E-15 or 0.25E-15
timestep 1E-15
**** scaling -- this lets you scale the gaussian frequencies by a constant
scaling 1.0
temperature 298.15
**** thermostat 1 puts in a damping factor so as to bring the classical temperature toward the
desired temperature.
**** use a thermostatmult between 0.95 and 1, typically 0.995, so the damping happens slowly
- otherwise there will be
**** overadjustment in response to random variation
**** the thermostat is not exact. The second traj point ignores this, so it only applies to later
points handled by progdynb.
thermostat 1
thermostatmult 0.999
**** method3, method4, method5, and method6 -- These keywords let you add extra lines to
the gaussian input file.
#method3 and method4 add lines at the top of the input after the lines defining the method,
and
#this is useful to implement things like the iop for mPW1k
#method5 and method6 add lines after the geometry, after a blank line of course
#only a single term with no spaces can be added, one per method line. Here are some examples
to uncomment if needed
#method3 IOp(3/76=0572004280)
#method3 scrf=(pcm,solvent=ethanol)
#method3 scrf=(pcm,Solvent=dichloromethane)

```

```

#add the line below with big structures (more than 50 atoms) to get it to put out the distance
matrix and the input orientation
method3 iop(2/9=2000)
#other possibilities
#method4 emp=gd3bj
method4 int=ultrafine
#method4 scf=(conver=5)
#method4 iop(3/124=3)
#method4 scrf=(pcm,solvent=dms0,read)
#method5 radii=bondi
#method6
**** methodfile -- This keyword lets you add more complicated endings to gaussian input files
#such as a gen basis set. Put after the keyword the number of lines in a file you create called
#methodfile that contains the test you want to add to the end of the gaussian input
methodfile 0
**** numimag --This tells the program the number of imaginary frequencies in the starting
structure.
#if 0, treats as ground state and direction of all modes is random
#if 1, motion along the reaction coordinate will start out in the direction defined by searchdir
#if 2, only lowest freq will go direction of searchdir and other imag mode will go in random
direction
numimag 1
**** searchdir -- This keyword says what direction to follow the mode associated with the
imaginary frequency.
#The choices are "negative" and "positive". Positive moves in the direction defined in the
gaussian frequency calculation
#for the imaginary frequency, while negative moves in the opposite direction. The correct
choice can be made either
#by a careful inspection of the normal modes and standard orientation geometry, or by trial and
error.
searchdir negative
**** classical -- for quassiclassical dynamics, the default, use 0. for classical dynamics, use 1
#if there are no normal modes and the velocities are to be generated from scratch, use classical
2
classical 0
**** DRP, saddlepoint, and maxAtomMove --to run a DRP use 'DRP 1' in the line below,
otherwise leave it at 0 or comment it out
#the treatment of starting saddlepoints is not yet implemented so use saddlepoint no
#if DRP shows oscillations then decrease maxAtomMove
#DRP 1
#saddlepoint no
#maxAtomMove 0.01
**** cannonball -- The program can "fire" a trajectory from a starting position toward a
particular target, such as toward
#a ts. To use this, make a file cannontraj with numAtom lines and three numbers per line that
defines the vector
#for firing the trajectory, relative to the starting geometry's standard orientation. The number
following cannonball sets
#the extra energy being put into the structure in kcal/mol
#cannonball 10
**** keepevery --This tells the program how often to write the gaussian output file to file dyn,
after the first two points.

```

#Use 1 for most dynamics to start with, but use a higher number to save on disk space or molden loading time.

keepevery 1

\*\*\* highlevel --For ONIOM jobs, the following line states the number of highlevel atoms, #which must come before the medium level atoms. Use some high value such as 999 if not using ONIOM

highlevel 9999

\*\*\* fixedatom1, fixedatom2, fixedatom3, and fixedatom4 - These fix atoms in space. #Fixing one atom serves no useful purpose and messes things up, while fixing two atoms #fixes one distance and fixing three has the effect of fixing three distances, not just two #in current form fixed atoms only are meant to work with no displacements, that is, initialdis=0

#fixedatom1 16

#fixedatom2 1

#fixedatom3 4

#fixedatom4 20

#applyforce 1 lets one push atoms together or apart - a positive force pushes them together #format is applyforce force - with the units on force the same as in the Gaussian output file #applyforce 2 or 3 or 4 applies a polynomial force centered at dist0. 2 is just harmonic, 3 is second order, 4 is third order

#format is applyforce 4 forcecoefficient dist0 forcecoefficient2 forcecoefficient3

#then use atoms to chose the atoms with format atoms firstatom secondatom [additional atoms]

#applyforce 2 0.1 2.1

#atoms 16 1 2 3 4 5 6

#applyforceB 2 0.01 5.2

#atomsB 8 15

#applyforceC 2 0.01 5.2

#atomsC 8 15

#zeroatom pushes the numbered atom toward the origin with a small harmonic potential - good with boxon when you want to keep the reaction in the center

#zeroatom 16

\*\*\* boxon and boxsize - With boxon 1, a cubic box is set such that atoms that reach the edge #are reflected back toward the middle. Useful for dynamics with solvent molecules. This is a crude #implementation that is ok for a few thousand femtoseconds but will not conserve energy long term. #Set the box size so as to fit the entire initial molecule but not have too much extra room. #The dimensions of the box are two times the boxsize, e.g. boxsize 7.5 leads to a box that is 15 x 15 x 15 angstroms

boxon 0

boxsize 8

\*\*\* sphereon and spheresize and sphereforce - uses a force to push atoms within a sphere. notice that if the atom is far outside of #the sphere then the force is large unless sphereforce is set small

#sphereon 1

#spheresize 12.9

#sphereforce .01

#setting a value for empiricaldispersion sets its s6 value with the Grimme 2006 algorithm. Default is 0, with no empiricaldispersion; 1.0 for correction

empiricaldispersion 0.0

\*\*\* displacements -- This keyword lets you set the initialdis of particular modes by using a series of lines of the format



```

# displacements NumberOfMode InitialDisForThatMode, as in the example below. You should
be able to do as many of these as you like
# you might consider this for rotations where a straight-line displacement goes wrong at large
displacements
# The choices for InitialDisForThatMode are 0, 1, 2, and 10, where 10 does the same thing as 0
but is maintained for now because
# a previous version of the program had a bug that made 0 not work.
#displacements 2 0
#displacements 3 0
#displacements 4 0
#displacements 5 0
#displacements 6 0
#displacements 7 0
#displacements 8 0
#displacements 9 0
#displacements 10 0
*** etolerance --This sets the allowable difference between the desired energy in a trajectory
and the actual
#energy, known after point 1 from the potential energy + the kinetic energy in the initial
velocities.
#The unit is kcal/mol and 1 is a normal value for mid-sized organic systems. For very large and
floppy molecules, a larger value
#may be needed, but the value must stay way below the average thermal energy in the molecule
(not counting zpe).
#If initialdis is not 0 and few trajectories are being rejected, decrease the value.
etolerance 1
*** controlphase --It is sometimes useful to set the phase of particular modes in the
initialization of trajectories.
#The format is controlphase numberOfModeToControl positive or controlphase
numberOfModeToControl negative.
#controlphase 2 positive
*** damping -- The damping keyword lets you add or subtract energy from the system at each
point, by multiplying the velocities
#by the damping factor. A damping of 1 has no effect, and since you mostly want to change the
energy slowly, normal values range
#from 0.95 to 1.05. The use of damping lets one do simulated annealing - you add energy until
the structure is moving enough
#to sample the kinds of possibilities you are interested in, then you take away the energy slowly.
damping 1.00
#at a damping of .9995, the energy is cut in half in 693 points
*** reversetraj --This keyword sets the trajectories so that both directions from a transition
state are explored.
reversetraj true
#updated Aug 9, 2007 to include the possibility of classical dynamics by the keyword classical
#updated Jan 2008 to include fixed atoms, ONIOM jobs, keepevery, and box size
#update Feb 2008 to include methodfile parameter
# updated Nov 2008 to allow for start without an initial freq calc using classical = 2
# update Aug 2010 to include etolerance, damping controlphase and reversetraj
--- End of file

```

## Cartesian Coordinates

### Catalyst

CATa-MeOH

0 1

|    |               |               |               |
|----|---------------|---------------|---------------|
| Mg | -0.1264955464 | 0.7810007121  | 0.2231375775  |
| O  | -1.9720070365 | 0.4044166471  | 0.1335976432  |
| O  | 1.7562687404  | 0.9775358192  | 0.3116246580  |
| O  | -2.7616162815 | -0.3084572562 | -2.2426475454 |
| O  | 2.7993886856  | 0.5170256460  | 2.6434769647  |
| P  | 2.9822303264  | 0.7832895982  | 1.1944727179  |
| O  | 3.8326328148  | -0.3754107527 | 0.3771430088  |
| O  | 3.9333673052  | 2.1085790058  | 1.0161087291  |
| C  | 5.1393146020  | -0.6495026190 | 0.7763753446  |
| C  | 4.7641234238  | 2.3382869339  | -0.0694447135 |
| C  | 6.1081650280  | 0.3307794808  | 0.6095994329  |
| C  | 5.4306905300  | -1.9587331860 | 1.2522142146  |
| C  | 5.8560475959  | 1.5112659659  | -0.2600582744 |
| C  | 4.4723798523  | 3.4679638397  | -0.8852767433 |
| C  | 7.3896450435  | 0.1234531209  | 1.2210583231  |
| C  | 6.7086993637  | -2.1762432415 | 1.7378926902  |
| Si | 4.2742769798  | -3.4525040873 | 1.1045631712  |
| C  | 6.7139709662  | 1.7679044844  | -1.3882981532 |
| C  | 5.3732748607  | 3.7667949208  | -1.8903364907 |
| Si | 2.7861894120  | 4.3119060819  | -0.9492172289 |
| C  | 8.3755556772  | 1.1427194081  | 1.2950896588  |
| C  | 7.6823354226  | -1.1485614319 | 1.8027150916  |
| H  | 6.9896270501  | -3.1648122870 | 2.0873272189  |
| C  | 3.4237228832  | -3.5012385853 | -0.5788254894 |
| C  | 3.0597279513  | -3.5527927256 | 2.5310778158  |
| C  | 5.3576942556  | -4.9926359189 | 1.1960545662  |
| C  | 7.7596765637  | 0.8915637795  | -1.7857637227 |
| C  | 6.4929967353  | 2.9442114287  | -2.1717523829 |
| H  | 5.1979870180  | 4.6241727234  | -2.5330941715 |
| C  | 1.6495066575  | 3.0341593742  | -1.7500700196 |
| C  | 2.9036329647  | 5.7792557230  | -2.1230017553 |
| C  | 2.0791336848  | 4.9756325750  | 0.6595892992  |
| C  | 9.5897683806  | 0.9060428385  | 1.8986025593  |
| H  | 8.1541705974  | 2.1194866313  | 0.8823848830  |
| C  | 8.9503969563  | -1.3662915398 | 2.4022622523  |
| C  | 2.4090372342  | -4.4465216467 | -0.8144560479 |
| C  | 3.7885565282  | -2.6615706333 | -1.6438078879 |
| C  | 2.8723665305  | -2.4833322162 | 3.4196439088  |
| C  | 2.2927257229  | -4.7173535083 | 2.7273577479  |
| C  | 5.9290548375  | -5.5376365382 | 0.0339329561  |
| C  | 5.6522201576  | -5.6057780527 | 2.4258528342  |
| C  | 8.5672769358  | 1.1922044456  | -2.8597142030 |
| H  | 7.9170616698  | -0.0287268602 | -1.2394636769 |
| C  | 7.3536278749  | 3.2346377382  | -3.2625784823 |
| C  | 0.2487527510  | 3.1124286825  | -1.6419496276 |
| C  | 2.1948421979  | 1.9344828606  | -2.4337990873 |
| C  | 3.3279592950  | 7.0368723941  | -1.6602520070 |
| C  | 2.5899183232  | 5.6487452121  | -3.4860377219 |
| C  | 2.6080887322  | 4.7117345515  | 1.9341418606  |
| C  | 0.9537612392  | 5.8189448473  | 0.5763905416  |
| C  | 9.8882873065  | -0.3619903775 | 2.4502190657  |
| H  | 10.3251576072 | 1.7026440296  | 1.9559443242  |
| H  | 9.1594302418  | -2.3427207805 | 2.8299775868  |
| C  | 1.7678819408  | -4.5360418914 | -2.0478701917 |

|   |               |               |               |
|---|---------------|---------------|---------------|
| H | 2.0925201950  | -5.1078525905 | -0.0142332032 |
| C | 3.1430239510  | -2.7402990931 | -2.8803373636 |
| H | 4.5721330409  | -1.9241190557 | -1.5088301863 |
| C | 1.9170528418  | -2.5540317908 | 4.4367363711  |
| H | 3.4374861563  | -1.5664589240 | 3.3012652411  |
| C | 1.3385958419  | -4.7911925106 | 3.7391387498  |
| H | 2.4525300919  | -5.5841887227 | 2.0917773325  |
| C | 6.7704272798  | -6.6478395493 | 0.0964856294  |
| H | 5.7045821227  | -5.0918239516 | -0.9311488522 |
| C | 6.4945581663  | -6.7160304500 | 2.4947223663  |
| H | 5.2096716884  | -5.2149781627 | 3.3378422212  |
| C | 8.3780388955  | 2.3820202859  | -3.5991519300 |
| H | 9.3555992450  | 0.5024031776  | -3.1449954176 |
| H | 7.1722946401  | 4.1395091830  | -3.8357641190 |
| C | -0.5682243885 | 2.1006670400  | -2.1615345345 |
| H | -0.2218572817 | 3.9586213274  | -1.1516401594 |
| C | 1.3876594973  | 0.9150367387  | -2.9405434547 |
| H | 3.2717107283  | 1.8416955354  | -2.5252568949 |
| C | 3.4424949074  | 8.1225134340  | -2.5273875530 |
| H | 3.5592815534  | 7.1706416915  | -0.6070027281 |
| C | 2.7010668947  | 6.7322216080  | -4.3581468373 |
| H | 2.2493901487  | 4.6898866977  | -3.8665342108 |
| C | 2.0201233217  | 5.2489416484  | 3.0809095547  |
| H | 3.4697657336  | 4.0643185824  | 2.0352051188  |
| C | 0.3615615461  | 6.3515108415  | 1.7203279504  |
| H | 0.5372801855  | 6.0722761396  | -0.3938531965 |
| H | 10.8531357965 | -0.5347382056 | 2.9164599870  |
| C | 2.1250633643  | -3.6729225166 | -3.0848042709 |
| H | 0.9715758463  | -5.2576287494 | -2.2006787316 |
| H | 3.4398675098  | -2.0729016501 | -3.6848498501 |
| C | 1.1384166246  | -3.7003704714 | 4.5896968800  |
| H | 1.7791398541  | -1.7036612483 | 5.0980062826  |
| H | 0.7395719421  | -5.6869585380 | 3.8684906233  |
| C | 7.0560878699  | -7.2380105799 | 1.3287655906  |
| H | 7.2000194472  | -7.0553448930 | -0.8141529926 |
| H | 6.7085120472  | -7.1760076721 | 3.4552132287  |
| H | 9.0284738315  | 2.6083746521  | -4.4380699333 |
| C | 0.0020804686  | 0.9821982115  | -2.7911478069 |
| H | -1.6450303454 | 2.1860004393  | -2.0968307786 |
| H | 1.8407487153  | 0.0530713513  | -3.4205649712 |
| C | 3.1289554146  | 7.9709173270  | -3.8793996093 |
| H | 3.7713968330  | 9.0863584746  | -2.1499702084 |
| H | 2.4507990178  | 6.6113775331  | -5.4081560571 |
| C | 0.8917172646  | 6.0619451154  | 2.9783655268  |
| H | 2.4415439589  | 5.0226567784  | 4.0556168385  |
| H | -0.5094695191 | 6.9935918551  | 1.6306867044  |
| H | 1.6046024766  | -3.7275411668 | -4.0361940734 |
| H | 0.3733950818  | -3.7539823252 | 5.3574982646  |
| H | 7.7095828787  | -8.1040840465 | 1.3794550120  |
| H | -0.6533959654 | 0.1947148171  | -3.1444320262 |
| H | 3.2142234080  | 8.8163347975  | -4.5558333519 |
| H | 0.4299779430  | 6.4716132816  | 3.8716070932  |
| P | -3.0762213114 | -0.0215385240 | -0.8190035423 |
| O | -3.8305697843 | -1.2417743735 | -0.0281608854 |
| O | -4.2621487777 | 1.1267547335  | -0.7673645771 |
| C | -4.8519779253 | -1.7935451560 | -0.7927440083 |
| C | -5.3409651206 | 1.1038397096  | 0.1013989374  |
| C | -6.0595543736 | -1.1199215847 | -0.8209257172 |
| C | -4.5515394529 | -2.9626614341 | -1.5339330686 |
| C | -6.2527332637 | 0.0557804515  | 0.0759703143  |

|    |                |               |               |
|----|----------------|---------------|---------------|
| C  | -5.4653955217  | 2.2417638240  | 0.9465261337  |
| C  | -7.0601552783  | -1.5904599890 | -1.7342414682 |
| C  | -5.5491790632  | -3.4383364745 | -2.3642096207 |
| Si | -2.8662907528  | -3.8210749533 | -1.4680392136 |
| C  | -7.3454790337  | 0.0957001225  | 1.0107546130  |
| C  | -6.5753937802  | 2.3064519959  | 1.7669986433  |
| Si | -4.0803907485  | 3.5088921269  | 1.1623365848  |
| C  | -8.2834257521  | -0.9042279697 | -1.9571368523 |
| C  | -6.7975305591  | -2.7753728283 | -2.4977958965 |
| H  | -5.3756163195  | -4.3207743258 | -2.9757522345 |
| C  | -1.5491040229  | -2.9553924991 | -0.4405676545 |
| C  | -2.1921910396  | -4.0038948318 | -3.2110238736 |
| C  | -3.0549584252  | -5.5176998868 | -0.6667176789 |
| C  | -8.2463196478  | -0.9889168646 | 1.1896075463  |
| C  | -7.5257114939  | 1.2564995769  | 1.8284235202  |
| H  | -6.7154029704  | 3.1617321516  | 2.4208581100  |
| C  | -2.6216620880  | 2.6267825835  | 1.9719071193  |
| C  | -4.7069623456  | 4.8103383993  | 2.3707981337  |
| C  | -3.4713511629  | 4.4305961001  | -0.3626597891 |
| C  | -9.2112319745  | -1.3841481197 | -2.8532928421 |
| H  | -8.4764801700  | 0.0135358015  | -1.4158439690 |
| C  | -7.7821649657  | -3.2483662955 | -3.4050234195 |
| C  | -0.4316360094  | -2.3578887174 | -1.0314502927 |
| C  | -1.6344200320  | -2.9619894941 | 0.9645911518  |
| C  | -2.1578589698  | -2.8862920094 | -4.0665544254 |
| C  | -1.5967435592  | -5.1980918182 | -3.6484153932 |
| C  | -1.8937835688  | -6.2016247728 | -0.2561546759 |
| C  | -4.2920855076  | -6.1472668865 | -0.4642620063 |
| C  | -9.2902946462  | -0.9054020020 | 2.0831917056  |
| H  | -8.1007794219  | -1.8960232493 | 0.6179520614  |
| C  | -8.6201001653  | 1.3170023764  | 2.7304963801  |
| C  | -1.3070875796  | 3.0851774205  | 1.7810210856  |
| C  | -2.8097450458  | 1.4794028946  | 2.7596043870  |
| C  | -5.5221325634  | 5.8660374199  | 1.9255733308  |
| C  | -4.4095986406  | 4.7399773500  | 3.7414301942  |
| C  | -3.6079805312  | 3.9818936294  | -1.6871510636 |
| C  | -2.7647744440  | 5.6303539632  | -0.1479538725 |
| C  | -8.9676920058  | -2.5741849453 | -3.5777849723 |
| H  | -10.1372319346 | -0.8397338669 | -3.0107196902 |
| H  | -7.5714822322  | -4.1514964587 | -3.9710043334 |
| C  | 0.5834245668   | -1.7939379149 | -0.2476920892 |
| H  | -0.3314641490  | -2.3437593905 | -2.1093851724 |
| C  | -0.6440948987  | -2.3894230149 | 1.7539466644  |
| H  | -2.4953913209  | -3.4069080146 | 1.4518332951  |
| C  | -1.5301211319  | -2.9629163596 | -5.3099753759 |
| H  | -2.6011899154  | -1.9496727380 | -3.7412832093 |
| C  | -0.9708485277  | -5.2759503241 | -4.8937622013 |
| H  | -1.6192893675  | -6.0764775624 | -3.0097693695 |
| C  | -1.9650921499  | -7.4725805795 | 0.3114664082  |
| H  | -0.9230489916  | -5.7269525580 | -0.3754573908 |
| C  | -4.3705943667  | -7.4157904498 | 0.1147664651  |
| H  | -5.2063835913  | -5.6376056803 | -0.7532620566 |
| C  | -9.4934422123  | 0.2626020699  | 2.8534353457  |
| H  | -9.9611513535  | -1.7506747425 | 2.2025946757  |
| H  | -8.7423457087  | 2.2126948990  | 3.3330582089  |
| C  | -0.2154269195  | 2.4027893202  | 2.3343210778  |
| H  | -1.1175240356  | 3.9770368808  | 1.1953435279  |
| C  | -1.7281581555  | 0.7866556187  | 3.3071542883  |
| H  | -3.8131402596  | 1.0908148961  | 2.9078736411  |
| C  | -6.0271594771  | 6.8121412674  | 2.8162417307  |

|   |                |               |               |
|---|----------------|---------------|---------------|
| H | -5.7556530587  | 5.9546495652  | 0.8678295199  |
| C | -4.9113831268  | 5.6847591094  | 4.6375011898  |
| H | -3.7745059781  | 3.9398199337  | 4.1106645723  |
| C | -3.0373002421  | 4.6876127736  | -2.7480961952 |
| H | -4.1439646988  | 3.0628813846  | -1.8895744497 |
| C | -2.1889280130  | 6.3347973455  | -1.2050059463 |
| H | -2.6661236538  | 6.0214693386  | 0.8603278314  |
| H | -9.7108152242  | -2.9429277139 | -4.2777481544 |
| C | 0.4770826596   | -1.8084096930 | 1.1490072890  |
| H | 1.4736922575   | -1.3933703803 | -0.7183431140 |
| H | -0.7278999408  | -2.4147758103 | 2.8338446664  |
| C | -0.9328781532  | -4.1553719729 | -5.7249197758 |
| H | -1.5063247696  | -2.0899427532 | -5.9560369330 |
| H | -0.5156509598  | -6.2084375274 | -5.2149115477 |
| C | -3.2074195575  | -8.0830858460 | 0.4975071384  |
| H | -1.0560568607  | -7.9840779530 | 0.6146748731  |
| H | -5.3396001405  | -7.8820812017 | 0.2671160046  |
| H | -10.3248623314 | 0.3156217071  | 3.5491348041  |
| C | -0.4229493566  | 1.2345156246  | 3.0875649246  |
| H | 0.7873016951   | 2.7906858037  | 2.2026141338  |
| H | -1.9013605741  | -0.1174638055 | 3.8819979518  |
| C | -5.7222266447  | 6.7217658364  | 4.1758235657  |
| H | -6.6544090016  | 7.6204642341  | 2.4518031420  |
| H | -4.6673996973  | 5.6135564670  | 5.6934679921  |
| C | -2.3169983155  | 5.8583161146  | -2.5104952639 |
| H | -3.1482950165  | 4.3140261513  | -3.7615930031 |
| H | -1.6459443323  | 7.2555128891  | -1.0114721252 |
| H | 1.2652168120   | -1.3994345088 | 1.7679353381  |
| H | -0.4451355156  | -4.2129207415 | -6.6938558204 |
| H | -3.2674064396  | -9.0706803097 | 0.9450652135  |
| H | 0.4381421155   | 0.7054651023  | 3.4844131774  |
| H | -6.1125003215  | 7.4590906701  | 4.8712002494  |
| H | -1.8622834271  | 6.3984726969  | -3.3353118488 |
| C | -2.9286146235  | -5.6872461400 | 3.2852119384  |
| H | -3.4507596341  | -5.4137825591 | 2.3592132050  |
| H | -2.6185655520  | -6.7368624370 | 3.1994263371  |
| H | -3.6321225793  | -5.6016887472 | 4.1174394740  |
| O | -1.8392244960  | -4.8209331361 | 3.5754890712  |
| H | -1.2402777134  | -4.8231104989 | 2.8172439081  |

CATb-MeOH

0 1

|    |               |               |               |
|----|---------------|---------------|---------------|
| Mg | 0.9174894099  | 1.1856007231  | -0.3728477255 |
| O  | 2.6446981626  | 0.6102572757  | 0.0612078671  |
| O  | -5.3894212357 | 2.7298724718  | 0.6982726726  |
| O  | 2.8176336624  | -0.8734140138 | 2.1910325344  |
| O  | -4.7599524838 | 0.3273951627  | 1.6598542680  |
| P  | -4.8616363746 | 1.3582729436  | 0.5659078317  |
| O  | -5.5353918499 | 0.7073144658  | -0.8131302552 |
| O  | -3.2301609751 | 1.3623706740  | -0.0109077862 |
| C  | -5.1103901228 | -0.5495027692 | -1.1563857320 |
| C  | -2.8578338340 | 1.5211512699  | -1.3044506047 |
| C  | -3.9577515519 | -0.6561882146 | -1.9239537858 |
| C  | -5.8693973812 | -1.6554571512 | -0.6921394092 |
| C  | -3.2176799670 | 0.5901232381  | -2.2873371214 |
| C  | -1.9486605194 | 2.6026825559  | -1.5476269173 |
| C  | -3.4764983211 | -1.9789489296 | -2.2406667643 |
| C  | -5.3786823617 | -2.9129048826 | -0.9755712859 |
| Si | -7.4896783778 | -1.5342668244 | 0.2873964733  |
| C  | -2.8159786663 | 0.8608747284  | -3.6378204151 |

|    |                |               |               |
|----|----------------|---------------|---------------|
| C  | -1.4455743951  | 2.7372081674  | -2.8322376797 |
| Si | -1.4544760112  | 3.7563828753  | -0.1084493646 |
| C  | -2.3010135790  | -2.2472347357 | -2.9929900302 |
| C  | -4.1941691774  | -3.1109546910 | -1.7286701289 |
| H  | -5.8943436572  | -3.7940558347 | -0.6008128664 |
| C  | -8.0377023103  | 0.1759016975  | 0.8157431813  |
| C  | -7.2657749831  | -2.6666370705 | 1.7719326597  |
| C  | -8.8563636189  | -2.2272503566 | -0.8176965718 |
| C  | -3.3041807030  | 0.1134465151  | -4.7440765165 |
| C  | -1.8847278511  | 1.9172591440  | -3.9020973315 |
| H  | -0.7203296532  | 3.5075301836  | -3.0646838451 |
| C  | -0.6738085179  | 5.3364811264  | -0.8047516807 |
| C  | -0.2124287659  | 2.7977953379  | 0.9981894966  |
| C  | -2.8127362598  | 4.3553111527  | 1.0196212645  |
| C  | -1.8477975816  | -3.5310932709 | -3.1996348187 |
| H  | -1.7457099950  | -1.4274124426 | -3.4175270762 |
| C  | -3.7081095553  | -4.4232103943 | -1.9639934816 |
| C  | -7.9213331495  | 0.6251038039  | 2.1393150841  |
| C  | -8.5836537974  | 1.0539750843  | -0.1363472729 |
| C  | -6.2645795088  | -2.3826492400 | 2.7207753271  |
| C  | -8.0540323694  | -3.8129471830 | 1.9588846712  |
| C  | -10.1933000790 | -2.0768956630 | -0.4043325285 |
| C  | -8.6189339228  | -2.9065909025 | -2.0226228904 |
| C  | -2.8573014170  | 0.3610457087  | -6.0217273362 |
| H  | -4.0434438630  | -0.6572362242 | -4.5641928692 |
| C  | -1.4262950975  | 2.1340104945  | -5.2295864756 |
| C  | -0.9737998489  | 5.8435612583  | -2.0826631380 |
| C  | 0.1191846412   | 6.1485587819  | 0.0310005758  |
| C  | -0.6653800859  | 1.5767986734  | 1.5800741176  |
| C  | 1.0119855604   | 3.3141852571  | 1.4931720389  |
| C  | -2.9761157957  | 3.8957739314  | 2.3340828958  |
| C  | -3.6809976249  | 5.3536536795  | 0.5491620352  |
| C  | -2.5551948935  | -4.6380566800 | -2.6806237882 |
| H  | -0.9341061328  | -3.6909366297 | -3.7639391727 |
| H  | -4.2719617065  | -5.2582234479 | -1.5576834831 |
| C  | -8.3163425104  | 1.9137613148  | 2.4958138703  |
| H  | -7.4992382856  | -0.0273237005 | 2.8946850214  |
| C  | -8.9776637355  | 2.3411236221  | 0.2155515390  |
| H  | -8.6901980475  | 0.7306966217  | -1.1680546528 |
| C  | -6.0701164803  | -3.2164048515 | 3.8212466262  |
| H  | -5.6417266184  | -1.5023162046 | 2.5897548676  |
| C  | -7.8542351576  | -4.6523115292 | 3.0567694752  |
| H  | -8.8322769744  | -4.0521988135 | 1.2398616661  |
| C  | -11.2468919670 | -2.5972908245 | -1.1539732624 |
| H  | -10.4111963917 | -1.5347058600 | 0.5118838533  |
| C  | -9.6697287137  | -3.4246878548 | -2.7815120760 |
| H  | -7.6006864625  | -3.0274084924 | -2.3788116756 |
| C  | -1.8949950908  | 1.3688465708  | -6.2708589314 |
| H  | -3.2520651663  | -0.2192023560 | -6.8498672118 |
| H  | -0.7132019007  | 2.9352974476  | -5.4068394153 |
| C  | -0.4488612437  | 7.0569237623  | -2.5308935361 |
| H  | -1.6453600248  | 5.3004692157  | -2.7371064032 |
| C  | 0.6552708857   | 7.3558159160  | -0.4130807077 |
| H  | 0.2923197125   | 5.8581374901  | 1.0610453499  |
| C  | 0.0632545915   | 0.9155100683  | 2.5722622844  |
| H  | -1.6159272127  | 1.1600582505  | 1.2752912457  |
| C  | 1.7242684622   | 2.6664912569  | 2.5020371705  |
| H  | 1.4184168516   | 4.2273435220  | 1.0831227687  |
| C  | -3.9859266468  | 4.4036699749  | 3.1472388525  |
| H  | -2.3273740372  | 3.1209668773  | 2.7281548621  |

|    |                |               |               |
|----|----------------|---------------|---------------|
| C  | -4.6962324031  | 5.8560395309  | 1.3563548063  |
| H  | -3.5682637331  | 5.7401314297  | -0.4602700797 |
| H  | -2.1954294837  | -5.6474342037 | -2.8521505895 |
| C  | -8.8395279093  | 2.7749295651  | 1.5345382451  |
| H  | -8.2005159665  | 2.2484040065  | 3.5224011472  |
| H  | -9.3814369551  | 3.0099894297  | -0.5389089391 |
| C  | -6.8620120688  | -4.3542065796 | 3.9904178187  |
| H  | -5.2973111546  | -2.9787189649 | 4.5471343225  |
| H  | -8.4732380562  | -5.5362866449 | 3.1831524244  |
| C  | -10.9861049327 | -3.2744212562 | -2.3467264877 |
| H  | -12.2702723395 | -2.4697429211 | -0.8127113323 |
| H  | -9.4604013991  | -3.9427666759 | -3.7132901592 |
| H  | -1.5474483124  | 1.5472052785  | -7.2834399685 |
| C  | 0.3863703051   | 7.8071201845  | -1.7055498300 |
| H  | -0.7007748877  | 7.4171748856  | -3.5238438672 |
| H  | 1.2687271464   | 7.9520023685  | 0.2560126649  |
| C  | 1.2539704105   | 1.4684557249  | 3.0442361065  |
| H  | -0.3251476969  | -0.0236449586 | 2.9498870179  |
| H  | 2.6598595737   | 3.0866362909  | 2.8460154855  |
| C  | -4.8507874826  | 5.3795994763  | 2.6574618688  |
| H  | -4.1067902737  | 4.0237984061  | 4.1570310212  |
| H  | -5.3709675281  | 6.6133944614  | 0.9689359922  |
| H  | -9.1329834179  | 3.7841281522  | 1.8087292378  |
| H  | -6.7069801657  | -5.0045400928 | 4.8469134933  |
| H  | -11.8051746969 | -3.6771115826 | -2.9357433080 |
| H  | 0.8028113079   | 8.7466854360  | -2.0554431567 |
| H  | 1.8346751163   | 0.9475522767  | 3.7946735506  |
| H  | -5.6476268225  | 5.7652368394  | 3.2863928594  |
| P  | 3.4306608167   | -0.3505346354 | 0.9452963137  |
| O  | 3.9301905631   | -1.5232293664 | -0.0925964142 |
| O  | 4.8758775499   | 0.3670042388  | 1.2791198531  |
| C  | 4.5932229777   | -2.5405932941 | 0.5904095474  |
| C  | 6.0465363742   | 0.1642657375  | 0.5611847449  |
| C  | 5.9095757228   | -2.3144004857 | 0.9481216290  |
| C  | 3.8448079807   | -3.6919539519 | 0.9304012971  |
| C  | 6.5997259098   | -1.1022528751 | 0.4248658295  |
| C  | 6.6493028781   | 1.3455118340  | 0.0444771995  |
| C  | 6.5373274987   | -3.2696244475 | 1.8138361056  |
| C  | 4.4838523011   | -4.6339709306 | 1.7149923294  |
| Si | 2.0566524225   | -3.9792295751 | 0.3911775814  |
| C  | 7.8173786613   | -1.2252665109 | -0.3332893810 |
| C  | 7.8675336270   | 1.2187687281  | -0.5940309446 |
| Si | 5.7312211576   | 2.9888799297  | -0.0172735569 |
| C  | 7.8317192842   | -3.0756040920 | 2.3646381966  |
| C  | 5.8099593888   | -4.4474924212 | 2.1855914029  |
| H  | 3.9562073286   | -5.5325269846 | 2.0259599139  |
| C  | 1.2491876278   | -2.5194138170 | -0.5124942782 |
| C  | 1.0023984201   | -4.3502446564 | 1.8921820556  |
| C  | 2.0165954418   | -5.3875667171 | -0.8545656794 |
| C  | 8.3873676156   | -2.4816512805 | -0.6751886083 |
| C  | 8.4760695668   | -0.0439924436 | -0.8016560517 |
| H  | 8.3621208344   | 2.0990913331  | -0.9934976241 |
| C  | 4.2717163546   | 2.7368766386  | -1.1951015370 |
| C  | 6.8713537055   | 4.2654619920  | -0.7961049771 |
| C  | 5.1852773319   | 3.6648020660  | 1.6462411129  |
| C  | 8.3899532550   | -4.0115524420 | 3.2052522231  |
| H  | 8.3759616425   | -2.1714375586 | 2.1215881066  |
| C  | 6.4210776968   | -5.3978063873 | 3.0456360788  |
| C  | 0.1665062671   | -1.8365695803 | 0.0491591522  |
| C  | 1.6703611876   | -2.1473159752 | -1.8052880786 |

|   |               |               |               |
|---|---------------|---------------|---------------|
| C | 1.0583288599  | -3.4930401577 | 3.0086381784  |
| C | 0.0692929985  | -5.3996443164 | 1.8971666911  |
| C | 0.8379198054  | -5.6129030639 | -1.5913867243 |
| C | 3.1157250537  | -6.2262891258 | -1.0958137023 |
| C | 9.5636075226  | -2.5583178963 | -1.3865151830 |
| H | 7.8824542604  | -3.3904150322 | -0.3758662767 |
| C | 9.6949397069  | -0.1560907973 | -1.5206424897 |
| C | 3.1096092349  | 3.5148321776  | -1.1233255640 |
| C | 4.3228976648  | 1.7285352132  | -2.1745373235 |
| C | 7.7233929785  | 5.0470200482  | 0.0031054162  |
| C | 6.9344455521  | 4.4336202253  | -2.1897775498 |
| C | 5.3533634411  | 2.9586247429  | 2.8484989496  |
| C | 4.6227161016  | 4.9538696663  | 1.7129101537  |
| C | 7.6860812540  | -5.1911194902 | 3.5424862271  |
| H | 9.3786832991  | -3.8396553966 | 3.6192690894  |
| H | 5.8599670256  | -6.2887428916 | 3.3129646299  |
| C | -0.5007866655 | -0.8236793622 | -0.6552921905 |
| H | -0.1975864477 | -2.0921606273 | 1.0347825681  |
| C | 1.0683959650  | -1.1001792027 | -2.4879636673 |
| H | 2.4960620956  | -2.6758880447 | -2.2705522021 |
| C | 0.1943178471  | -3.6794278769 | 4.0870337913  |
| H | 1.7640241797  | -2.6670468949 | 3.0175374160  |
| C | -0.7909115677 | -5.5875598981 | 2.9800052455  |
| H | 0.0093759470  | -6.0721616554 | 1.0464185967  |
| C | 0.7604179360  | -6.6449520190 | -2.5247123147 |
| H | -0.0270235939 | -4.9728503824 | -1.4416313751 |
| C | 3.0423411789  | -7.2590387685 | -2.0317261249 |
| H | 4.0424306746  | -6.0666933363 | -0.5531315104 |
| C | 10.2372837278 | -1.3871512464 | -1.8027722547 |
| H | 9.9747193404  | -3.5315341325 | -1.6364465918 |
| H | 10.1818588702 | 0.7555562487  | -1.8553191641 |
| C | 2.0127554347  | 3.2717619931  | -1.9608726689 |
| H | 3.0385198983  | 4.3181237172  | -0.3997147923 |
| C | 3.2487691937  | 1.4867018501  | -3.0271476056 |
| H | 5.2045552113  | 1.0993264187  | -2.2487817842 |
| C | 8.6114683273  | 5.9577626343  | -0.5683297331 |
| H | 7.6852673406  | 4.9476146164  | 1.0842961002  |
| C | 7.8207928784  | 5.3429891864  | -2.7664042260 |
| H | 6.2791249112  | 3.8507808369  | -2.8312016963 |
| C | 4.9616832452  | 3.5123068917  | 4.0687247202  |
| H | 5.7759952716  | 1.9615917625  | 2.8315937974  |
| C | 4.2108136783  | 5.5028276195  | 2.9269308214  |
| H | 4.5231746465  | 5.5487495457  | 0.8085527735  |
| H | 8.1412940913  | -5.9220633906 | 4.2031328873  |
| C | -0.0260696722 | -0.4286001565 | -1.9172451034 |
| H | -1.4163199403 | -0.4273275771 | -0.2298881595 |
| H | 1.4147619214  | -0.8171395249 | -3.4756055159 |
| C | -0.7316134779 | -4.7245016919 | 4.0741111677  |
| H | 0.2397490087  | -3.0050829750 | 4.9371418064  |
| H | -1.5101452028 | -6.4010404629 | 2.9664295443  |
| C | 1.8639122572  | -7.4710332925 | -2.7467127122 |
| H | -0.1570490660 | -6.8036103207 | -3.0838214032 |
| H | 3.9054946016  | -7.8951417705 | -2.2047504916 |
| H | 11.1675698173 | -1.4644176427 | -2.3564080640 |
| C | 2.0784740471  | 2.2440080130  | -2.9144035621 |
| H | 1.1457887483  | 3.9216479832  | -1.9044551348 |
| H | 3.3159710201  | 0.6975585901  | -3.7685285930 |
| C | 8.6617603892  | 6.1060777269  | -1.9551905698 |
| H | 9.2610606434  | 6.5531492359  | 0.0664256247  |
| H | 7.8526779074  | 5.4599444566  | -3.8456556358 |



|   |               |               |               |
|---|---------------|---------------|---------------|
| C | 4.3808018847  | 4.7805389187  | 4.1098713805  |
| H | 5.1016882894  | 2.9482103269  | 4.9858040230  |
| H | 3.7703509173  | 6.4950773182  | 2.9527330889  |
| H | -0.5645078098 | 0.3143621514  | -2.4933287101 |
| H | -1.4080392018 | -4.8628300575 | 4.9123023575  |
| H | 1.8058456025  | -8.2732439336 | -3.4763807404 |
| H | 1.2403266260  | 2.0637266250  | -3.5807074062 |
| H | 9.3508845488  | 6.8166344151  | -2.4018462585 |
| H | 4.0655872926  | 5.2060283369  | 5.0576608441  |
| O | -2.4213853577 | -1.0571011398 | 1.8069710158  |
| H | -3.2465488332 | -0.5128698725 | 1.7869989048  |
| C | -2.8243242955 | -2.4135587521 | 1.9024528233  |
| H | -3.5756810349 | -2.6730904269 | 1.1475402776  |
| H | -1.9484298780 | -3.0497926393 | 1.7501703429  |
| H | -3.2395440347 | -2.6550274361 | 2.8908222078  |

### Unsubstituted Model

CY1

0 1

|    |               |               |               |
|----|---------------|---------------|---------------|
| O  | 0.0446115596  | 0.5527046608  | 0.9338260313  |
| C  | -0.9578399103 | -0.0410394269 | 0.5895812356  |
| C  | -2.5925680154 | -1.2825521165 | -0.6701385263 |
| C  | -2.0295564588 | -0.5062638119 | 1.5350322730  |
| C  | -2.6360775559 | -1.7052446628 | 0.8048460470  |
| H  | -2.6475813355 | -2.1339380315 | -1.3626896713 |
| H  | -3.4562668899 | -0.6326132676 | -0.8885626406 |
| H  | -1.6191664279 | -0.6937172885 | 2.5353969962  |
| H  | -2.7655107201 | 0.3147414971  | 1.6186345189  |
| C  | -1.2726893356 | -0.4852527091 | -0.8425710905 |
| C  | -1.5200599667 | 0.7127507710  | -1.7753545805 |
| H  | -2.3512100226 | 1.3261663231  | -1.4012153553 |
| H  | -1.8009873635 | 0.3286756046  | -2.7659889317 |
| Mg | 2.0892998865  | 0.6968466717  | 0.7889819695  |
| O  | 3.2244853882  | -0.4846160375 | -0.4925052010 |
| O  | 2.1333971165  | -1.3134427921 | 1.5635188743  |
| P  | 3.0749900445  | -1.6873422063 | 0.4315735196  |
| O  | 2.5046511021  | -2.9907507104 | -0.3302186446 |
| O  | 4.5303004657  | -2.1473973570 | 0.9338927396  |
| C  | 4.6444733685  | -3.0971078046 | 1.9796300917  |
| H  | 4.2529378041  | -4.0787252973 | 1.6662515868  |
| H  | 5.7112713547  | -3.1932295195 | 2.2161779048  |
| H  | 4.0980145107  | -2.7611357710 | 2.8738207485  |
| C  | 3.1249989794  | -3.4144005907 | -1.5328558605 |
| H  | 2.5645788036  | -4.2831276446 | -1.9003993040 |
| H  | 3.1029348899  | -2.6132612934 | -2.2876574261 |
| H  | 4.1720762847  | -3.7070349925 | -1.3545387022 |
| O  | 3.0029330911  | 1.8941355278  | 2.2892940643  |
| C  | 2.9768096562  | 2.8693411214  | 1.5077195865  |
| C  | 3.5206475739  | 4.2579051858  | 1.7538633014  |
| N  | 2.4233590512  | 2.7247375508  | 0.3010247095  |
| C  | 3.2193525304  | 4.9624351481  | 0.4296637433  |
| H  | 4.5895914505  | 4.1915763976  | 2.0025209712  |
| H  | 3.0144541221  | 4.6971530493  | 2.6259035284  |
| C  | 2.5051148147  | 3.8981521147  | -0.4229100829 |
| Br | -0.0270173622 | 1.9212432585  | -2.0234775954 |
| H  | 2.5625903751  | 5.8382729335  | 0.5296056309  |
| H  | 4.1193661551  | 5.2968542387  | -0.1060406544 |
| O  | 2.0864808870  | 4.0742142215  | -1.5411657709 |
| C  | -0.1333139546 | -1.3793466184 | -1.3479323934 |

|   |               |               |               |
|---|---------------|---------------|---------------|
| H | -0.3878488632 | -1.7632224017 | -2.3472211205 |
| H | 0.8110988993  | -0.8228821559 | -1.4310345682 |
| H | 0.0410822949  | -2.2341214495 | -0.6792780685 |
| H | -2.0077675731 | -2.5945438130 | 0.9695855434  |
| H | -3.6501205051 | -1.9510065057 | 1.1467601030  |

EC1

0 1

|    |               |               |               |
|----|---------------|---------------|---------------|
| O  | -0.7402626821 | -0.4961827432 | 1.4349349416  |
| C  | -2.0003602637 | -0.2935271753 | 0.9604826101  |
| C  | -3.1119497957 | -1.2667742546 | 1.4890166028  |
| C  | -2.8156352028 | 0.8620447432  | 1.6093312018  |
| C  | -4.0483143193 | -0.0590564019 | 1.6836055788  |
| H  | -2.7680000937 | -1.6864885641 | 2.4452342019  |
| H  | -3.4456435380 | -2.0851821714 | 0.8321419272  |
| H  | -2.3927547140 | 1.0455999481  | 2.6072772695  |
| H  | -2.8960962695 | 1.8257948983  | 1.0825300381  |
| C  | -2.0187686956 | -0.3125649942 | -0.5713598709 |
| C  | -2.6849513700 | 0.5706158209  | -1.3402883771 |
| H  | -3.2845121039 | 1.3786039551  | -0.9147830557 |
| H  | -2.7057818540 | 0.4631785036  | -2.4290924598 |
| Mg | 1.0105095445  | 0.0431512861  | 1.4154034795  |
| O  | 2.4977019439  | -0.1712216394 | -0.1102178323 |
| O  | 2.6799518891  | -0.8386196872 | 2.2686112126  |
| P  | 3.4301817318  | -0.7448060405 | 0.9476239152  |
| O  | 4.0396610176  | -2.1756344442 | 0.5662446032  |
| O  | 4.7267900998  | 0.2203816485  | 1.0512112812  |
| C  | 5.6765786787  | -0.0140540490 | 2.0808917426  |
| H  | 6.1629045506  | -0.9935778558 | 1.9501200905  |
| H  | 6.4341717998  | 0.7765427770  | 2.0124234426  |
| H  | 5.1952927892  | 0.0181475772  | 3.0699791110  |
| C  | 4.6067882390  | -2.3868204009 | -0.7173522473 |
| H  | 4.8808132106  | -3.4468406944 | -0.7787081835 |
| H  | 3.8811355478  | -2.1469356615 | -1.5088577221 |
| H  | 5.5089971391  | -1.7694593901 | -0.8557137231 |
| O  | 1.6016909801  | 2.0267066303  | 1.5546052300  |
| C  | 2.0589877386  | 2.6933232201  | 0.6338921090  |
| C  | 3.3976374156  | 3.3784946658  | 0.6151925656  |
| N  | 1.4446514102  | 2.8933705909  | -0.5623659412 |
| C  | 3.4518223417  | 4.1002742867  | -0.7315882089 |
| H  | 4.1426613020  | 2.5719829927  | 0.7102209282  |
| H  | 3.4934518886  | 4.0292493171  | 1.4949041724  |
| C  | 2.1948912946  | 3.6742960543  | -1.4722722629 |
| Br | -0.1561885533 | 2.0356781704  | -0.9738581788 |
| H  | 3.4380631085  | 5.1961737535  | -0.6407910513 |
| H  | 4.3249052981  | 3.8353490311  | -1.3428793754 |
| O  | 1.8567744019  | 3.9292719591  | -2.5865383764 |
| C  | -1.2314512847 | -1.4363759582 | -1.1869397873 |
| H  | -0.1514047035 | -1.2829776538 | -1.0372780554 |
| H  | -1.4798055839 | -2.3908843333 | -0.6983478736 |
| H  | -1.4227494196 | -1.5239456164 | -2.2653990168 |
| H  | -4.6425510157 | -0.0287941634 | 2.6079799285  |
| H  | -4.7274001383 | 0.0809523428  | 0.8294090260  |

EP1

0 1

|   |               |               |              |
|---|---------------|---------------|--------------|
| O | 0.0441686384  | 0.4705090044  | 0.8052623417 |
| C | -1.1285205353 | -0.3435196859 | 0.8151989752 |
| C | -1.1475243101 | -1.8605311640 | 0.8010809982 |
| C | -2.1790524229 | -0.2864596543 | 1.9095535080 |

|    |               |               |               |
|----|---------------|---------------|---------------|
| C  | -2.4822297851 | -1.7710738368 | 1.5840941629  |
| H  | -0.3246365767 | -2.2697046287 | 1.4025305481  |
| H  | -1.1518076620 | -2.3526328522 | -0.1811799058 |
| H  | -1.7054051678 | -0.1615367299 | 2.8939260866  |
| H  | -2.9917735730 | 0.4441140306  | 1.7937159872  |
| C  | -0.8940379605 | 0.5884322925  | -0.2978724232 |
| C  | -1.5953357253 | 1.9242397323  | -0.2985409808 |
| H  | -1.0454912220 | 2.6441795992  | -0.9191490611 |
| H  | -1.7111006342 | 2.3069591036  | 0.7214217170  |
| Mg | 2.0821678295  | 0.3101942372  | 0.6565635154  |
| O  | 2.6901339133  | -1.2409823211 | -0.5810304729 |
| O  | 2.1931966042  | -1.4427129812 | 1.8308218449  |
| P  | 2.6769079950  | -2.2020486861 | 0.6029056989  |
| O  | 1.7160319497  | -3.4714804692 | 0.3589910358  |
| O  | 4.1355510921  | -2.8448907019 | 0.7816102095  |
| C  | 4.4342061519  | -3.6066131691 | 1.9406412285  |
| H  | 3.8331142416  | -4.5297616036 | 1.9715225465  |
| H  | 5.4978591900  | -3.8690612474 | 1.8901761525  |
| H  | 4.2417932339  | -3.0213123111 | 2.8522941817  |
| C  | 1.8696779453  | -4.2549547691 | -0.8129377781 |
| H  | 1.0874468581  | -5.0237651444 | -0.7943800347 |
| H  | 1.7570883742  | -3.6357006242 | -1.7160839605 |
| H  | 2.8575878162  | -4.7418167879 | -0.8350695963 |
| O  | 3.5014605008  | 1.6985564168  | 1.3758715633  |
| C  | 3.1386343917  | 2.5291257645  | 0.5160660085  |
| C  | 3.6920670387  | 3.9163169235  | 0.2896468307  |
| N  | 2.1433821744  | 2.2132803330  | -0.3201045741 |
| C  | 2.8470600165  | 4.4140967625  | -0.8846762264 |
| H  | 4.7698695522  | 3.8505250322  | 0.0833147240  |
| H  | 3.5770407401  | 4.5070733348  | 1.2101557433  |
| C  | 1.8545579413  | 3.2722184860  | -1.1526724518 |
| Br | -3.3824984929 | 1.7523068360  | -1.0497618595 |
| H  | 2.2879648737  | 5.3371994065  | -0.6774095354 |
| H  | 3.4301857414  | 4.5923404732  | -1.7999123609 |
| O  | 0.9538985341  | 3.3101048213  | -1.9609201632 |
| C  | -0.3842000913 | 0.0987701975  | -1.6261544780 |
| H  | 0.2219380532  | 0.8875287638  | -2.0952000297 |
| H  | 0.2300626727  | -0.8040796495 | -1.5072545592 |
| H  | -1.2348473686 | -0.1274119204 | -2.2850292794 |
| H  | -2.5935756734 | -2.4483313964 | 2.4403779783  |
| H  | -3.3574272230 | -1.8744169370 | 0.9279913747  |

TS1a

0 1

|    |               |               |               |
|----|---------------|---------------|---------------|
| O  | 0.2893424870  | -0.3592614767 | 1.5686389278  |
| C  | 1.5936617061  | -0.0630693240 | 1.3079029639  |
| C  | 2.3659538441  | 0.9542647616  | 2.1819100752  |
| C  | 2.7049479128  | -1.0926698175 | 1.6063501713  |
| C  | 3.6232891936  | 0.0733456596  | 2.0241376846  |
| H  | 1.9553820780  | 0.9129022570  | 3.2012621624  |
| H  | 2.4077745506  | 2.0043448431  | 1.8554588012  |
| H  | 2.3868023716  | -1.6878749765 | 2.4739056770  |
| H  | 3.0316749436  | -1.7822870288 | 0.8147007544  |
| C  | 1.3283291017  | 0.3283441382  | -0.1152440817 |
| C  | 1.6224053193  | -0.5204683858 | -1.2155255721 |
| H  | 2.5331158903  | -1.1198630970 | -1.1243122995 |
| H  | 1.4711013107  | -0.0716259687 | -2.2023318265 |
| Mg | -1.4735432890 | -0.9026253908 | 1.1206636542  |
| O  | -2.3904845287 | 0.3903057659  | -0.2701576866 |
| O  | -2.8714038275 | 0.2479332986  | 2.1541441251  |

|    |               |               |               |
|----|---------------|---------------|---------------|
| P  | -3.2149438018 | 0.9823204358  | 0.8676546406  |
| O  | -2.9429168162 | 2.5575745691  | 1.0694573527  |
| O  | -4.7750708682 | 0.9027167712  | 0.4906000098  |
| C  | -5.7480169215 | 1.1895704713  | 1.4815071366  |
| H  | -5.7030300079 | 2.2480650437  | 1.7854188601  |
| H  | -6.7311271630 | 0.9821777955  | 1.0412101094  |
| H  | -5.5996056887 | 0.5564479580  | 2.3692686468  |
| C  | -3.1204212157 | 3.4452954644  | -0.0184857264 |
| H  | -2.8747798125 | 4.4531932087  | 0.3387603839  |
| H  | -2.4554508433 | 3.1823819180  | -0.8563076761 |
| H  | -4.1621553986 | 3.4317432603  | -0.3775480047 |
| O  | -2.2034685589 | -2.7412665994 | 0.9957540031  |
| C  | -2.2074154412 | -3.6264709655 | 0.1153133258  |
| C  | -3.1458098431 | -4.8155187682 | 0.1504603956  |
| N  | -1.4128176973 | -3.6578414476 | -0.9483412883 |
| C  | -2.7907635766 | -5.5841305014 | -1.1195729500 |
| H  | -4.1816234270 | -4.4483698136 | 0.1864642632  |
| H  | -2.9715979828 | -5.3752298145 | 1.0811719441  |
| C  | -1.6503457216 | -4.7767767008 | -1.7491321865 |
| Br | 0.1335101228  | -2.0832552145 | -1.1651324641 |
| H  | -2.4410342731 | -6.6103689157 | -0.9396935301 |
| H  | -3.6157747575 | -5.6464011459 | -1.8434672836 |
| O  | -1.0558795184 | -5.0489812851 | -2.7550236816 |
| C  | 0.5880055992  | 1.5966282765  | -0.3542607378 |
| H  | -0.3471601304 | 1.3868697193  | -0.8998133120 |
| H  | 0.3362434652  | 2.1155816292  | 0.5776436193  |
| H  | 1.2121823574  | 2.2452123847  | -0.9915847866 |
| H  | 4.2655755551  | 0.4128635178  | 1.1972041279  |
| H  | 4.2515778317  | -0.0731077596 | 2.9129063984  |

TS1b

0 1

|    |               |               |               |
|----|---------------|---------------|---------------|
| O  | -0.1238087984 | -1.9919445122 | -1.2376164380 |
| C  | 0.9979617128  | -2.4964451731 | -0.7615977359 |
| C  | 1.1803462858  | -4.1841857844 | -0.7236988090 |
| C  | 2.2478864506  | -2.5123833991 | -1.6712615045 |
| C  | 2.5268783422  | -4.0057195627 | -1.4252063166 |
| H  | 0.3498217661  | -4.4866408124 | -1.3755263621 |
| H  | 1.1430306366  | -4.7690881390 | 0.2071278238  |
| H  | 1.9041893924  | -2.3147928620 | -2.6937298258 |
| H  | 3.0360321522  | -1.7864731336 | -1.4238240884 |
| C  | 1.1789561534  | -2.4330439044 | 0.6798095729  |
| C  | 2.4720841413  | -2.1677384603 | 1.2973727250  |
| H  | 3.3598370038  | -2.4611939293 | 0.7310689117  |
| H  | 2.5492734933  | -2.4022571006 | 2.3638941772  |
| Mg | -0.8034886542 | -0.2033428339 | -1.0356042242 |
| O  | -1.8080464381 | 0.0168492960  | 0.8168409433  |
| O  | -2.8128030293 | 0.0559189244  | -1.4450372038 |
| P  | -3.1129245920 | 0.1696396615  | 0.0438467457  |
| O  | -4.2104065434 | -0.9348232983 | 0.4462571811  |
| O  | -3.7995428013 | 1.5666958815  | 0.4396313901  |
| C  | -4.9154295813 | 2.0333908192  | -0.3006073177 |
| H  | -5.7832181118 | 1.3665584971  | -0.1705585664 |
| H  | -5.1652915610 | 3.0302021366  | 0.0830165411  |
| H  | -4.6731560227 | 2.1000011363  | -1.3720039844 |
| C  | -4.5786563768 | -1.0961583925 | 1.8039664616  |
| H  | -5.3123007324 | -1.9106186389 | 1.8482467153  |
| H  | -3.7043635072 | -1.3563875049 | 2.4208544004  |
| H  | -5.0333933005 | -0.1757333323 | 2.2044641265  |
| O  | 0.2612645096  | 1.3735011489  | -1.3820516747 |

|    |               |               |               |
|----|---------------|---------------|---------------|
| C  | 0.9488717434  | 2.2909703059  | -0.8554180338 |
| C  | 0.9058054317  | 3.7085961550  | -1.4017244929 |
| N  | 1.7592228303  | 2.1534150959  | 0.1735113810  |
| C  | 1.8479578916  | 4.4591819468  | -0.4696240902 |
| H  | -0.1340606718 | 4.0667863801  | -1.3882033530 |
| H  | 1.2258416189  | 3.6950987792  | -2.4544345440 |
| C  | 2.3690430865  | 3.3674965815  | 0.4776450385  |
| Br | 2.2434740234  | -0.1701213424 | 1.0108244242  |
| H  | 2.7010804468  | 4.9346450389  | -0.9738974778 |
| H  | 1.3523299117  | 5.2373273378  | 0.1287701565  |
| O  | 3.1823918391  | 3.5353126540  | 1.3492813700  |
| C  | -0.0388314659 | -2.5183631891 | 1.5264396741  |
| H  | -0.5192021978 | -1.5236092924 | 1.5864155304  |
| H  | -0.7875278561 | -3.1607798478 | 1.0444420082  |
| H  | 0.1927202160  | -2.8662257362 | 2.5414879131  |
| H  | 3.3817533158  | -4.1968442450 | -0.7606702036 |
| H  | 2.6623748468  | -4.6184093498 | -2.3266059643 |

TS1c

0 1

|    |               |               |               |
|----|---------------|---------------|---------------|
| O  | -1.2630736309 | 1.2063246278  | 1.4524209019  |
| C  | -1.9214903129 | 1.8039551615  | 0.4610498993  |
| C  | -3.0274852503 | 1.0040828572  | -0.2928958692 |
| C  | -3.1314455328 | 2.8308403485  | 0.9104807528  |
| C  | -4.0960833332 | 2.0761379747  | -0.0106111457 |
| H  | -3.2107860822 | 0.0684337226  | 0.2482842048  |
| H  | -2.8167025573 | 0.7563135685  | -1.3421881623 |
| H  | -3.2454294555 | 2.6066144335  | 1.9784460400  |
| H  | -3.0227949218 | 3.9177181129  | 0.7762320511  |
| C  | -1.1405490651 | 2.7791033833  | -0.3266690259 |
| C  | -0.0282667438 | 3.4061759113  | 0.3163788276  |
| H  | -0.0491968549 | 3.3550165610  | 1.4085360160  |
| H  | 0.3169472951  | 4.3530933551  | -0.1097376261 |
| Mg | -0.1777075717 | -0.3557400461 | 1.1259609366  |
| O  | -0.6595201185 | -1.0985671125 | -0.8000527680 |
| O  | -1.2443930234 | -2.1357154510 | 1.3768849543  |
| P  | -1.3279072285 | -2.2927539256 | -0.1337721239 |
| O  | -2.8771497694 | -2.4537273221 | -0.5566858090 |
| O  | -0.6441972825 | -3.6486373478 | -0.6641296291 |
| C  | -0.9481700429 | -4.8777091145 | -0.0269023214 |
| H  | -2.0071743123 | -5.1472818542 | -0.1713144983 |
| H  | -0.3148712842 | -5.6473647162 | -0.4853872406 |
| H  | -0.7383795817 | -4.8210630108 | 1.0519258143  |
| C  | -3.2196236095 | -2.5147196967 | -1.9283429639 |
| H  | -4.3138253225 | -2.5680150485 | -1.9907743252 |
| H  | -2.8642259069 | -1.6199578606 | -2.4634389253 |
| H  | -2.7849223916 | -3.4074444225 | -2.4063760878 |
| O  | 1.7035366972  | -0.8610472858 | 1.4405925686  |
| C  | 2.7455749365  | -0.7443316690 | 0.7506434126  |
| C  | 3.9017238871  | -1.7191757225 | 0.8698652871  |
| N  | 2.9739583310  | 0.2082029738  | -0.1401671577 |
| C  | 4.8992012458  | -1.1980636497 | -0.1591506790 |
| H  | 3.5306467882  | -2.7355450235 | 0.6737886981  |
| H  | 4.2721136714  | -1.7066099946 | 1.9057367984  |
| C  | 4.2303213950  | 0.0634280418  | -0.7235169367 |
| Br | 1.3839998987  | 1.9554154247  | -0.1529733643 |
| H  | 5.8789754933  | -0.9265134903 | 0.2582435286  |
| H  | 5.0834311619  | -1.8968500249 | -0.9878839934 |
| O  | 4.7103977587  | 0.8081739319  | -1.5362391632 |
| C  | -1.4806400840 | 3.1088269935  | -1.7336637386 |

|   |               |              |               |
|---|---------------|--------------|---------------|
| H | -1.2097391456 | 2.2382809880 | -2.3551431639 |
| H | -2.5634101074 | 3.2488193029 | -1.8570233963 |
| H | -0.9471027752 | 3.9935379199 | -2.1016058417 |
| H | -4.4035456752 | 2.6538415848 | -0.8947947892 |
| H | -5.0095805863 | 1.7143006103 | 0.4802960533  |

TS1d

0 1

|    |               |               |               |
|----|---------------|---------------|---------------|
| C  | 0.0582300124  | 2.7834202524  | 0.5573933060  |
| C  | 0.3065787534  | 4.0702992178  | 1.4267258087  |
| C  | -1.1672450123 | 4.2037517358  | 1.8411485951  |
| H  | 0.7531956407  | 4.9268026905  | 0.9023383714  |
| H  | 0.9702226632  | 3.7624604459  | 2.2422972220  |
| C  | -0.1413426146 | 3.0041362949  | -0.8756299384 |
| C  | 0.1856524562  | 1.9450254284  | -1.8084385381 |
| H  | 1.1091188393  | 1.4003817392  | -1.5577395115 |
| H  | 0.1143710729  | 2.2296276107  | -2.8635580433 |
| Mg | 0.6638914583  | -0.2135340401 | 0.7875137553  |
| O  | 2.4155637622  | -1.0539335015 | 1.5313773308  |
| O  | 1.9024128558  | -0.6933004191 | -0.8658194620 |
| P  | 2.9544129659  | -1.1956411199 | 0.1155346732  |
| O  | 4.3209499855  | -0.3786086524 | -0.1217269950 |
| O  | 3.3685232748  | -2.7276743693 | -0.1420109728 |
| C  | 3.7311198814  | -3.1445745436 | -1.4463615570 |
| H  | 4.6516739342  | -2.6394806224 | -1.7817934492 |
| H  | 3.9079979506  | -4.2265087690 | -1.4050372867 |
| H  | 2.9243837049  | -2.9312455024 | -2.1642257977 |
| C  | 5.3908770532  | -0.5342043116 | 0.7940945972  |
| H  | 6.1840235750  | 0.1604963938  | 0.4904823234  |
| H  | 5.0663399820  | -0.2974114505 | 1.8187969441  |
| H  | 5.7835878070  | -1.5638683807 | 0.7726044509  |
| O  | -0.8883176150 | -1.3044856921 | 1.2759526429  |
| C  | -1.9714413778 | -1.7199007487 | 0.7847412909  |
| C  | -2.7818291519 | -2.8036219562 | 1.4758559575  |
| N  | -2.5257432000 | -1.2923803263 | -0.3343899909 |
| C  | -3.9705498977 | -2.9866439867 | 0.5405679483  |
| H  | -3.0477521510 | -2.4620095882 | 2.4873334928  |
| H  | -2.1525006611 | -3.6974889180 | 1.5971252102  |
| C  | -3.7236225059 | -1.9578737319 | -0.5747508581 |
| Br | -1.2383390935 | 0.5582364210  | -1.4034639190 |
| H  | -4.0316559175 | -3.9875497871 | 0.0894427707  |
| H  | -4.9458651802 | -2.7832491143 | 1.0051527161  |
| O  | -4.4563321174 | -1.7585366916 | -1.5088498506 |
| C  | -0.7328151661 | 4.2485808368  | -1.4268179267 |
| H  | -1.5311630715 | 4.0019274964  | -2.1441553611 |
| H  | -1.1131542454 | 4.9458518808  | -0.6735332343 |
| H  | 0.0598608747  | 4.7550863219  | -2.0051746780 |
| H  | -1.3525642918 | 4.1790643883  | 2.9231253773  |
| H  | -1.6722636255 | 5.0929075392  | 1.4369448446  |
| O  | 0.6965084699  | 1.6939656294  | 0.9265156896  |
| C  | -1.5185728120 | 2.9090271817  | 1.1061022999  |
| H  | -1.6206598826 | 2.0201147861  | 1.7392636938  |
| H  | -2.3353693830 | 2.9306409324  | 0.3740350580  |

**Real model with achiral catalyst**

(2S,4R)-CY2

0 1

|   |               |               |               |
|---|---------------|---------------|---------------|
| O | 0.7332191310  | -0.5871603570 | -0.4627994537 |
| C | -0.4278912248 | -0.5363009141 | -0.8216872406 |

|    |               |               |               |
|----|---------------|---------------|---------------|
| C  | -1.0803804729 | 0.6505598126  | -1.4706462951 |
| C  | -2.3162503686 | -1.3523025886 | -1.9337187817 |
| C  | -2.4856330309 | 0.1943756525  | -1.9221901268 |
| H  | -0.4477028370 | 0.9029806257  | -2.3388443613 |
| H  | -1.0212081463 | 1.5347085442  | -0.8200373939 |
| H  | -1.8038870873 | -1.6450993650 | -2.8664951942 |
| H  | -3.2733468691 | -1.8877682336 | -1.9175370146 |
| C  | -2.7911705828 | 0.7319215421  | -3.3276185917 |
| H  | -3.7345599240 | 0.3281201278  | -3.7214945467 |
| H  | -2.8775991784 | 1.8284090493  | -3.3087324621 |
| H  | -1.9898539500 | 0.4609468909  | -4.0326747265 |
| C  | -3.6237839846 | 0.5818629848  | -0.9656796359 |
| C  | -3.4305013907 | 1.3062395734  | 0.2122231811  |
| C  | -4.9251735639 | 0.1495161804  | -1.2596033589 |
| C  | -4.4926384889 | 1.5632552672  | 1.0795712144  |
| H  | -2.4386187587 | 1.6628800590  | 0.4861443965  |
| C  | -5.9891677269 | 0.4110719128  | -0.4026073484 |
| H  | -5.1178030803 | -0.4215965530 | -2.1715968793 |
| C  | -5.7755043261 | 1.1164070727  | 0.7807688348  |
| H  | -4.3075551726 | 2.1130653721  | 2.0047900629  |
| H  | -6.9901422668 | 0.0562957830  | -0.6581359360 |
| C  | -1.3929737374 | -1.7073609231 | -0.7432658511 |
| C  | -0.7303204161 | -3.0696999517 | -0.9903989315 |
| H  | -0.1124652523 | -3.0369197653 | -1.8975188149 |
| H  | -1.5142497601 | -3.8261143065 | -1.1243254600 |
| C  | -2.0998080592 | -1.6455782139 | 0.6215286003  |
| C  | -1.4701339168 | -1.0917943975 | 1.7424094937  |
| C  | -3.3842244466 | -2.1789887408 | 0.7690502587  |
| C  | -2.1235673394 | -1.0607589116 | 2.9742054622  |
| H  | -0.4643659466 | -0.6701798330 | 1.6827311490  |
| C  | -4.0383130341 | -2.1376614891 | 1.9958225869  |
| H  | -3.8992126161 | -2.6218311481 | -0.0851818055 |
| C  | -3.4107176439 | -1.5727151481 | 3.1051257221  |
| H  | -1.6082039936 | -0.6357175022 | 3.8384595276  |
| H  | -5.0465817144 | -2.5472687215 | 2.0833412642  |
| Mg | 2.2663187273  | 0.6986676796  | -0.0371358558 |
| O  | 1.3767280482  | 1.0799713437  | 1.8778902154  |
| O  | 1.4115824452  | 2.5879538172  | -0.0811705220 |
| P  | 0.9841341964  | 2.4577262220  | 1.3785033495  |
| O  | -0.6050574738 | 2.7448902153  | 1.4566289936  |
| O  | 1.6196575942  | 3.5869990576  | 2.3235723419  |
| C  | 1.5783098748  | 4.9495248712  | 1.9304347998  |
| H  | 0.5448343042  | 5.3321668987  | 1.9411423114  |
| H  | 2.1802012326  | 5.5127737699  | 2.6537167340  |
| H  | 1.9981382367  | 5.0776255233  | 0.9215397158  |
| C  | -1.2764613202 | 2.7138507804  | 2.7073694169  |
| H  | -2.1759800976 | 3.3360289203  | 2.6114735192  |
| H  | -1.5696619272 | 1.6840076065  | 2.9594102967  |
| H  | -0.6414868908 | 3.1207909319  | 3.5093756897  |
| O  | 3.1624688980  | 0.3146276339  | -1.9660696374 |
| C  | 4.1945530633  | -0.0433167760 | -1.3638729554 |
| C  | 5.4749431614  | -0.5675940533 | -1.9721841687 |
| N  | 4.2319538342  | 0.0174702633  | -0.0265094607 |
| C  | 6.3384273745  | -0.8337505107 | -0.7388231443 |
| H  | 5.8845416039  | 0.1867100560  | -2.6597013136 |
| H  | 5.2514825414  | -1.4615195292 | -2.5724694468 |
| C  | 5.4566901367  | -0.4245866897 | 0.4563307170  |
| Br | 0.4143913113  | -3.7378658771 | 0.4229083611  |
| H  | 6.6252233062  | -1.8882695593 | -0.6190429816 |
| H  | 7.2663527842  | -0.2449759484 | -0.7113395447 |

|   |               |               |              |
|---|---------------|---------------|--------------|
| O | 5.7861679121  | -0.4823274029 | 1.6109543239 |
| H | -6.6039801779 | 1.3152147581  | 1.4637101570 |
| H | -3.9227165221 | -1.5399613892 | 4.0690975442 |

(2S,4R)-CY3

0 1

|    |               |               |               |
|----|---------------|---------------|---------------|
| O  | 0.8853328265  | -0.6398495459 | -0.4908719827 |
| C  | -0.2860559548 | -0.6100249873 | -0.8200283165 |
| C  | -0.9924106303 | 0.5882074880  | -1.3864669778 |
| C  | -2.1810898664 | -1.4239609386 | -1.9219242056 |
| C  | -2.3964647435 | 0.1141565223  | -1.8218825586 |
| H  | -0.3929805287 | 0.9034844442  | -2.2578355486 |
| H  | -0.9388759136 | 1.4402434160  | -0.6941781637 |
| H  | -1.6893704539 | -1.6489939026 | -2.8841638766 |
| H  | -3.1206715843 | -1.9899331419 | -1.9084316450 |
| C  | -2.7574250330 | 0.7148274803  | -3.1883532809 |
| H  | -3.6982939192 | 0.3022566040  | -3.5792220098 |
| H  | -2.8766196712 | 1.8055205947  | -3.1089366393 |
| H  | -1.9678359609 | 0.5071242263  | -3.9272554048 |
| C  | -3.5175498196 | 0.4214448915  | -0.8161802298 |
| C  | -3.3095608968 | 1.0896174367  | 0.3924577809  |
| C  | -4.8160338480 | -0.0276942929 | -1.0975569285 |
| C  | -4.3534858364 | 1.2767237836  | 1.2989615227  |
| H  | -2.3194100593 | 1.4559348710  | 0.6600369127  |
| C  | -5.8626530048 | 0.1647687248  | -0.2012370850 |
| H  | -5.0200203033 | -0.5573860844 | -2.0318011307 |
| C  | -5.6339392761 | 0.8154707696  | 1.0102315673  |
| H  | -4.1553057286 | 1.7825992689  | 2.2463358510  |
| H  | -6.8618744688 | -0.2000353117 | -0.4497226393 |
| C  | -1.2115813466 | -1.8140738794 | -0.7793388733 |
| C  | -0.5178806695 | -3.1403551200 | -1.1168702872 |
| H  | 0.0752898908  | -3.0434313937 | -2.0359558853 |
| H  | -1.2835402177 | -3.9116609225 | -1.2705075331 |
| C  | -1.8806904563 | -1.8278361286 | 0.6036907433  |
| C  | -1.2347705599 | -1.3168443501 | 1.7399043153  |
| C  | -3.1589871644 | -2.3602808824 | 0.7657257377  |
| C  | -1.8658663801 | -1.3107253876 | 2.9752624153  |
| H  | -0.2270515544 | -0.8996656010 | 1.6829251854  |
| C  | -3.8076898894 | -2.3528753870 | 1.9974069942  |
| H  | -3.6953863907 | -2.7781908219 | -0.0877685080 |
| C  | -3.1662271830 | -1.8081361946 | 3.1146428776  |
| H  | -1.3586843026 | -0.9196584059 | 3.8588560203  |
| H  | -4.8157381408 | -2.7605687471 | 2.0652664354  |
| Mg | 2.3663193100  | 0.7107627247  | -0.0854699097 |
| O  | 1.5773594886  | 0.9881447374  | 1.8847635084  |
| O  | 1.4228024421  | 2.5609083215  | -0.0150654471 |
| P  | 1.0851731001  | 2.3589132426  | 1.4596178901  |
| O  | -0.5095265943 | 2.5578767856  | 1.6324681302  |
| O  | 1.7131597453  | 3.4874279368  | 2.4107829846  |
| C  | 1.5726172355  | 4.8583908455  | 2.0746738470  |
| H  | 0.5214476957  | 5.1792138862  | 2.1567553708  |
| H  | 2.1817154249  | 5.4295368343  | 2.7856567389  |
| H  | 1.9265231223  | 5.0474482647  | 1.0501521173  |
| C  | -1.1126724796 | 2.4466902550  | 2.9134592384  |
| H  | -2.0391808908 | 3.0354371732  | 2.8911881353  |
| H  | -1.3523780218 | 1.3962954859  | 3.1334878933  |
| H  | -0.4527071115 | 2.8449787111  | 3.6994306118  |
| O  | 3.1433365526  | 0.5098207008  | -2.0996632822 |
| C  | 4.2264506860  | 0.1571882974  | -1.5926967212 |
| C  | 5.4856357201  | -0.2580337986 | -2.3187283083 |



|    |               |               |               |
|----|---------------|---------------|---------------|
| N  | 4.3505055545  | 0.1192376994  | -0.2591032998 |
| C  | 6.4406761282  | -0.5709770877 | -1.1666003589 |
| H  | 5.8145204987  | 0.5634768233  | -2.9716747982 |
| H  | 5.2622901422  | -1.1158037390 | -2.9697079793 |
| C  | 5.6226561341  | -0.2973338637 | 0.1097740682  |
| Br | 0.6804488699  | -3.8460988491 | 0.2323005455  |
| H  | 6.7835934189  | -1.6152958506 | -1.1472007118 |
| H  | 7.3399271199  | 0.0611923839  | -1.1518613540 |
| O  | 6.0302385285  | -0.4259567206 | 1.2334076602  |
| H  | -6.4490325509 | 0.9629181556  | 1.7220702467  |
| O  | -3.7150997738 | -1.7234443626 | 4.3426297565  |
| C  | -5.0277381774 | -2.1763490604 | 4.5328081942  |
| H  | -5.7443956418 | -1.6271919216 | 3.8972081474  |
| H  | -5.1231770107 | -3.2567406364 | 4.3270237477  |
| H  | -5.2739994156 | -1.9947740992 | 5.5859712887  |

(2S,4R)-CY4

0 1

|    |               |               |               |
|----|---------------|---------------|---------------|
| O  | 0.8622306163  | -0.8010098850 | 0.0709588775  |
| C  | -0.1216616186 | -0.9753506877 | -0.6293125837 |
| C  | -0.3965905547 | -0.2753830080 | -1.9236382123 |
| C  | -1.9543716073 | -2.0497562046 | -1.6708522857 |
| C  | -1.8364495033 | -0.6414541811 | -2.3140233112 |
| H  | 0.3252204908  | -0.7128651670 | -2.6384919108 |
| H  | -0.1396119444 | 0.7919538597  | -1.8688935718 |
| H  | -1.4134301891 | -2.7675984670 | -2.3107701948 |
| H  | -2.9888206169 | -2.4074089937 | -1.6076994715 |
| C  | -1.9933079995 | -0.6981821573 | -3.8372930860 |
| H  | -2.9848451035 | -1.0692138963 | -4.1328462505 |
| H  | -1.8658605306 | 0.3035807620  | -4.2730078411 |
| H  | -1.2390772270 | -1.3655458240 | -4.2826714931 |
| C  | -2.8829285310 | 0.2963512499  | -1.6959443092 |
| C  | -2.5485119917 | 1.3303035354  | -0.8174815987 |
| C  | -4.2429154706 | 0.0647510267  | -1.9478238165 |
| C  | -3.5379791579 | 2.0786250115  | -0.1793556868 |
| H  | -1.5109261697 | 1.5662981100  | -0.5843158859 |
| C  | -5.2328105794 | 0.8172007159  | -1.3233129009 |
| H  | -4.5441013480 | -0.7366609263 | -2.6277998941 |
| C  | -4.8835063329 | 1.8241293538  | -0.4229354841 |
| H  | -3.2360625940 | 2.8608076888  | 0.5194474521  |
| H  | -6.2844983366 | 0.6092884630  | -1.5333706306 |
| C  | -1.2298032191 | -1.9799915264 | -0.3015109600 |
| C  | -0.6954656036 | -3.3839282192 | 0.0388619114  |
| H  | -0.0005430042 | -3.7242929053 | -0.7399845433 |
| H  | -1.5450525916 | -4.0779434449 | 0.0771843981  |
| C  | -2.0897947584 | -1.3984183388 | 0.8371028112  |
| C  | -1.5052721591 | -0.6741311201 | 1.8841092706  |
| C  | -3.4744712696 | -1.5847474940 | 0.8542530093  |
| C  | -2.2912595221 | -0.1079596624 | 2.8791011004  |
| H  | -0.4269496044 | -0.5270747514 | 1.9263581450  |
| C  | -4.2679547732 | -0.9976395975 | 1.8333677372  |
| H  | -3.9681686994 | -2.1616538935 | 0.0733832109  |
| C  | -3.6773055491 | -0.2367942485 | 2.8380141141  |
| H  | -1.8169881260 | 0.4510241560  | 3.6864283896  |
| H  | -5.3508237955 | -1.1206295955 | 1.8016695929  |
| Mg | 2.2711604181  | 0.6998224560  | -0.0568500288 |
| O  | 1.7774418243  | 1.7064041481  | 1.7191419369  |
| O  | 0.9785542964  | 2.2910895229  | -0.5399987913 |
| P  | 0.9338736979  | 2.6961034020  | 0.9330670406  |
| O  | -0.6068861752 | 2.7391636695  | 1.4008566801  |

|    |               |               |               |
|----|---------------|---------------|---------------|
| O  | 1.4623055136  | 4.1877547204  | 1.1871019164  |
| C  | 0.9520774971  | 5.2605360270  | 0.4109110660  |
| H  | -0.1161495424 | 5.4287351150  | 0.6231265652  |
| H  | 1.5208202520  | 6.1571225963  | 0.6850859237  |
| H  | 1.0764267035  | 5.0585297079  | -0.6636230040 |
| C  | -0.9324320182 | 3.0582646059  | 2.7451403450  |
| H  | -0.7300826319 | 4.1200070002  | 2.9562729830  |
| H  | -2.0024492911 | 2.8558406416  | 2.8763527013  |
| H  | -0.3513174154 | 2.4379436276  | 3.4449645364  |
| O  | 2.8054781233  | -0.0529950874 | -2.0563096355 |
| C  | 3.9376100056  | -0.2947367901 | -1.5921343493 |
| C  | 5.1047601621  | -0.9342188721 | -2.3091393567 |
| N  | 4.2116704086  | 0.0224265658  | -0.3203723204 |
| C  | 6.1859197710  | -0.9511152869 | -1.2281236013 |
| H  | 5.3573374436  | -0.3354217886 | -3.1962543337 |
| H  | 4.8077030252  | -1.9302677533 | -2.6687809013 |
| C  | 5.5167180779  | -0.3249292276 | 0.0092339472  |
| Br | 0.2405526248  | -3.5970670175 | 1.7205770857  |
| H  | 6.5366766505  | -1.9596313238 | -0.9669567510 |
| H  | 7.0764484681  | -0.3596188304 | -1.4843460289 |
| O  | 6.0432070650  | -0.1673358547 | 1.0776543879  |
| H  | -5.6564195823 | 2.4039509283  | 0.0858077302  |
| C  | -4.5140186276 | 0.5100222577  | 3.8404183323  |
| F  | -5.7767154326 | 0.0801364796  | 3.8733436863  |
| F  | -4.5537759279 | 1.8226283997  | 3.5460904510  |
| F  | -4.0189790493 | 0.4113693633  | 5.0776074895  |

(2S,4S)-CY2

0 1

|   |               |               |               |
|---|---------------|---------------|---------------|
| O | 0.9660724224  | -0.7346463463 | -0.4679436671 |
| C | -0.1157630791 | -0.7662475797 | -1.0249604238 |
| C | -0.5185325257 | 0.1153065609  | -2.1646722310 |
| C | -2.2009473562 | -1.5607546202 | -1.8591937855 |
| C | -2.0291996214 | -0.1037764308 | -2.3578359359 |
| H | 0.0547510880  | -0.2569135707 | -3.0344306526 |
| H | -0.1901703762 | 1.1512468731  | -1.9961169359 |
| H | -1.9234766976 | -2.2478198760 | -2.6758426810 |
| H | -3.2373277127 | -1.7902424002 | -1.5812047050 |
| C | -2.8288027681 | 0.8803692952  | -1.4841342056 |
| H | -2.6373904268 | 1.9132381412  | -1.8088266694 |
| H | -3.9066881888 | 0.6801793155  | -1.5755507224 |
| H | -2.5535236136 | 0.8023795083  | -0.4231944057 |
| C | -2.4695844661 | 0.0780252816  | -3.8051689053 |
| C | -3.5388329797 | -0.6537126094 | -4.3350499197 |
| C | -1.8558625968 | 1.0358058171  | -4.6220670736 |
| C | -3.9733241733 | -0.4460350285 | -5.6432216828 |
| H | -4.0496868338 | -1.3990731571 | -3.7215656573 |
| C | -2.2874592980 | 1.2459319044  | -5.9303535944 |
| H | -1.0280249206 | 1.6342168488  | -4.2345778912 |
| C | -3.3473974139 | 0.5037452354  | -6.4477779216 |
| H | -4.8071443449 | -1.0326009090 | -6.0353884591 |
| H | -1.7893534312 | 1.9955666714  | -6.5491019537 |
| C | -1.2190162361 | -1.7610830804 | -0.6737297397 |
| C | -0.6923124667 | -3.2097378771 | -0.7047385359 |
| H | -0.1339741670 | -3.3979072389 | -1.6315959915 |
| H | -1.5461566319 | -3.8985061319 | -0.6675821682 |
| C | -1.8462397603 | -1.4361423892 | 0.6911832076  |
| C | -1.2387509411 | -0.5915832865 | 1.6263491070  |
| C | -3.0566684034 | -2.0517140610 | 1.0340325203  |
| C | -1.8411854262 | -0.3600273019 | 2.8636622000  |

|    |               |               |               |
|----|---------------|---------------|---------------|
| H  | -0.2916931116 | -0.0924373669 | 1.4171805421  |
| C  | -3.6541274821 | -1.8225608967 | 2.2698012011  |
| H  | -3.5455150186 | -2.7324905565 | 0.3326402735  |
| C  | -3.0487334057 | -0.9690583869 | 3.1911749785  |
| H  | -1.3434198988 | 0.2997049470  | 3.5779142764  |
| H  | -4.5964723728 | -2.3172579273 | 2.5144602609  |
| Mg | 2.5085930904  | 0.6103615208  | -0.2722556875 |
| O  | 1.4020403627  | 1.6150615531  | 1.2623619643  |
| O  | 1.7042485281  | 2.3567219985  | -1.0753744168 |
| P  | 1.0460376407  | 2.6979280709  | 0.2596753524  |
| O  | -0.5428197039 | 2.8215138048  | -0.0026715210 |
| O  | 1.4634299119  | 4.1378340689  | 0.8248242633  |
| C  | 1.4296679618  | 5.2721707206  | -0.0270329735 |
| H  | 0.3950311744  | 5.5174704735  | -0.3165533876 |
| H  | 1.8566867199  | 6.1112245306  | 0.5353150320  |
| H  | 2.0246978400  | 5.0956648169  | -0.9355387420 |
| C  | -1.4255021985 | 3.1076351023  | 1.0702146056  |
| H  | -2.4291737097 | 3.2221598818  | 0.6423419341  |
| H  | -1.4352825730 | 2.2839342778  | 1.7993896723  |
| H  | -1.1374436019 | 4.0402292941  | 1.5804822287  |
| O  | 3.6400456790  | -0.3143333476 | -1.8579791620 |
| C  | 4.5344294034  | -0.5494925057 | -1.0209836375 |
| C  | 5.8327393285  | -1.2882625286 | -1.2494932561 |
| N  | 4.3821171055  | -0.1284074280 | 0.2416822939  |
| C  | 6.4777629173  | -1.2532925773 | 0.1363543642  |
| H  | 6.4090530720  | -0.7745586789 | -2.0326600511 |
| H  | 5.6129084447  | -2.2988682080 | -1.6232625756 |
| C  | 5.4735437894  | -0.4899891550 | 1.0205006094  |
| Br | 0.4728565149  | -3.7218509750 | 0.7542184751  |
| H  | 6.6439744016  | -2.2487974526 | 0.5721208903  |
| H  | 7.4427693818  | -0.7273902869 | 0.1632250665  |
| O  | 5.6215983758  | -0.2524655052 | 2.1896081478  |
| H  | -3.6848170340 | 0.6656468990  | -7.4736143064 |
| H  | -3.5137894763 | -0.7876153256 | 4.1623325846  |

(2S,4S)-CY3

0 1

|   |               |               |               |
|---|---------------|---------------|---------------|
| O | 1.2024152176  | -0.6889794397 | -0.3519494433 |
| C | 0.2543374366  | -0.7167935967 | -1.1163903187 |
| C | 0.1265643314  | 0.1160232636  | -2.3522952462 |
| C | -1.6551927829 | -1.4802861092 | -2.3160382486 |
| C | -1.3258050345 | -0.0557091487 | -2.8282649374 |
| H | 0.8419657649  | -0.3243816053 | -3.0722327383 |
| H | 0.4666995283  | 1.1457483090  | -2.1666340979 |
| H | -1.2513483170 | -2.2135853980 | -3.0338422057 |
| H | -2.7347893149 | -1.6612451467 | -2.2431476990 |
| C | -2.2304356835 | 0.9987721114  | -2.1640941763 |
| H | -1.9444617060 | 2.0062744716  | -2.4983589771 |
| H | -3.2818784624 | 0.8261890902  | -2.4383043553 |
| H | -2.1481805004 | 0.9734932966  | -1.0688461248 |
| C | -1.4709639106 | 0.0730927618  | -4.3393857656 |
| C | -2.4564530541 | -0.6363041417 | -5.0359397302 |
| C | -0.6623384539 | 0.9602572676  | -5.0607577102 |
| C | -2.6214369774 | -0.4755430116 | -6.4107630082 |
| H | -3.1134403236 | -1.3268277797 | -4.5025907676 |
| C | -0.8242680142 | 1.1234145621  | -6.4352387167 |
| H | 0.1071897384  | 1.5394136343  | -4.5451218628 |
| C | -1.8038311861 | 0.4040561760  | -7.1172068663 |
| H | -3.3948671799 | -1.0435845524 | -6.9326108284 |
| H | -0.1778404270 | 1.8181207473  | -6.9760413554 |

|    |               |               |               |
|----|---------------|---------------|---------------|
| C  | -0.9367455253 | -1.6574366527 | -0.9515511041 |
| C  | -0.4746127367 | -3.1233078021 | -0.8255377260 |
| H  | 0.2438810848  | -3.3735420958 | -1.6177473593 |
| H  | -1.3491981278 | -3.7786641673 | -0.9290071013 |
| C  | -1.8030874488 | -1.2474616174 | 0.2484041831  |
| C  | -1.3375057350 | -0.4289409935 | 1.2884318706  |
| C  | -3.0983167528 | -1.7562700410 | 0.3544551003  |
| C  | -2.1492985504 | -0.1222212582 | 2.3708969776  |
| H  | -0.3304769013 | -0.0100123402 | 1.2749541112  |
| C  | -3.9233567390 | -1.4599640531 | 1.4384191808  |
| H  | -3.4951305583 | -2.4168663515 | -0.4203180002 |
| C  | -3.4505637931 | -0.6297925214 | 2.4600447055  |
| H  | -1.7808076646 | 0.5096535385  | 3.1806909215  |
| H  | -4.9258562857 | -1.8861959131 | 1.4725938411  |
| Mg | 2.7552614564  | 0.6284472506  | -0.0377285514 |
| O  | 1.5758859982  | 1.6804508620  | 1.3921170121  |
| O  | 2.0078056335  | 2.3570584972  | -0.9452816732 |
| P  | 1.2509505546  | 2.7172072739  | 0.3314486385  |
| O  | -0.3215427452 | 2.7640325794  | -0.0331010302 |
| O  | 1.5768487837  | 4.1891678083  | 0.8725858171  |
| C  | 1.5556971860  | 5.2920237759  | -0.0193686422 |
| H  | 0.5407406783  | 5.4625270539  | -0.4138813489 |
| H  | 1.8754058677  | 6.1736670174  | 0.5490353312  |
| H  | 2.2439629671  | 5.1259597494  | -0.8616198542 |
| C  | -1.2668473282 | 3.0914870910  | 0.9736825317  |
| H  | -2.2429886878 | 2.7143175061  | 0.6430609606  |
| H  | -1.0077782253 | 2.6144238006  | 1.9306321035  |
| H  | -1.3229323017 | 4.1821947535  | 1.1147046049  |
| O  | 3.9426624557  | -0.3230263124 | -1.5776691649 |
| C  | 4.7954577378  | -0.5660264165 | -0.7010938393 |
| C  | 6.0946281491  | -1.3196546250 | -0.8698430531 |
| N  | 4.5925675902  | -0.1398002180 | 0.5531359491  |
| C  | 6.6791603508  | -1.2864684905 | 0.5425355678  |
| H  | 6.7100410726  | -0.8151447733 | -1.6288623395 |
| H  | 5.8805495149  | -2.3293365345 | -1.2494783487 |
| C  | 5.6454490422  | -0.5099208758 | 1.3798440994  |
| Br | 0.3634948348  | -3.6110777831 | 0.8503254398  |
| H  | 6.8161541587  | -2.2819982917 | 0.9882739664  |
| H  | 7.6473785493  | -0.7701581696 | 0.6096449082  |
| O  | 5.7449442735  | -0.2697894388 | 2.5534686577  |
| H  | -1.9299561852 | 0.5290980651  | -8.1946674894 |
| O  | -4.1626612100 | -0.2738386838 | 3.5472113046  |
| C  | -5.4610661419 | -0.7765956126 | 3.7069640476  |
| H  | -6.1286604956 | -0.4566215036 | 2.8876485310  |
| H  | -5.4690425349 | -1.8790597772 | 3.7639029493  |
| H  | -5.8415232544 | -0.3707783512 | 4.6520119338  |

(2S,4S)-CY4

01

|   |               |               |              |
|---|---------------|---------------|--------------|
| O | -1.6197501616 | -0.8114392273 | 0.0502629686 |
| C | -0.8228105379 | -1.1789880455 | 0.8947678362 |
| C | -0.8427027160 | -0.7630281152 | 2.3308660815 |
| C | 0.7927667248  | -2.4866238819 | 2.0548681328 |
| C | 0.4911941822  | -1.2431327953 | 2.9274165579 |
| H | -1.7033586325 | -1.2963757928 | 2.7766444476 |
| H | -1.0624316731 | 0.3120998179  | 2.4188363974 |
| H | 0.2123719794  | -3.3388354607 | 2.4452451378 |
| H | 1.8495800505  | -2.7774425406 | 2.0890957734 |
| C | 1.5707150496  | -0.1597348711 | 2.7476695873 |
| H | 1.3195019348  | 0.7254987441  | 3.3489902377 |

|    |               |               |               |
|----|---------------|---------------|---------------|
| H  | 2.5502414197  | -0.5365539295 | 3.0777752643  |
| H  | 1.6540874118  | 0.1670510152  | 1.7018314710  |
| C  | 0.3893834885  | -1.5794325194 | 4.4098956321  |
| C  | 1.1875138549  | -2.5757544049 | 4.9841330043  |
| C  | -0.4610073614 | -0.8490346580 | 5.2493080590  |
| C  | 1.1293946818  | -2.8439421751 | 6.3508812709  |
| H  | 1.8725824789  | -3.1559725789 | 4.3621110071  |
| C  | -0.5217342695 | -1.1144997310 | 6.6159389130  |
| H  | -1.0868573215 | -0.0550196333 | 4.8353303544  |
| C  | 0.2721803085  | -2.1154184119 | 7.1727119134  |
| H  | 1.7592202404  | -3.6291526707 | 6.7749373227  |
| H  | -1.1963111687 | -0.5339172093 | 7.2489529907  |
| C  | 0.3088837745  | -2.1685840483 | 0.6157156551  |
| C  | -0.2202475242 | -3.4677764404 | -0.0255897027 |
| H  | -1.0743992187 | -3.8564227294 | 0.5446820322  |
| H  | 0.5799502598  | -4.2192287924 | -0.0102294240 |
| C  | 1.3917198149  | -1.5305256725 | -0.2687443244 |
| C  | 1.1307851512  | -0.4442841943 | -1.1125817746 |
| C  | 2.6744108713  | -2.0897092777 | -0.2818587523 |
| C  | 2.1362109377  | 0.0810430880  | -1.9175668467 |
| H  | 0.1458033202  | 0.0199735844  | -1.1575487700 |
| C  | 3.6839047856  | -1.5615820386 | -1.0793178565 |
| H  | 2.9054787426  | -2.9584652193 | 0.3372646371  |
| C  | 3.4182707292  | -0.4628233916 | -1.8934134544 |
| H  | 1.9093351218  | 0.9230478894  | -2.5741973135 |
| H  | 4.6788938650  | -2.0081181894 | -1.0689317878 |
| Mg | -2.9388539175 | 0.7778325380  | -0.0286424766 |
| O  | -1.4464608845 | 1.9529423052  | -0.9967328434 |
| O  | -2.0879806527 | 2.0577141715  | 1.3857418563  |
| P  | -1.1356044687 | 2.6204928137  | 0.3320342620  |
| O  | 0.3723448996  | 2.3396145175  | 0.8349138098  |
| O  | -1.2165143157 | 4.2128002274  | 0.1861533978  |
| C  | -1.1965677692 | 5.0343104084  | 1.3431662046  |
| H  | -0.2353988167 | 4.9458836300  | 1.8752026232  |
| H  | -1.3291544247 | 6.0693567017  | 1.0063521620  |
| H  | -2.0121201642 | 4.7612231240  | 2.0292550403  |
| C  | 1.4718194861  | 2.8330125653  | 0.0838319127  |
| H  | 1.6945913845  | 3.8746437425  | 0.3617610556  |
| H  | 2.3399061925  | 2.2008746306  | 0.3113881207  |
| H  | 1.2714939132  | 2.7827078556  | -0.9969337663 |
| O  | -4.4177765055 | -0.3386243804 | 1.0903578365  |
| C  | -5.1808700389 | -0.2097964414 | 0.1122230142  |
| C  | -6.5796894358 | -0.7610636614 | -0.0393094842 |
| N  | -4.7691250923 | 0.4835374202  | -0.9580880218 |
| C  | -6.9755475200 | -0.2738953844 | -1.4335789791 |
| H  | -7.2112358078 | -0.3746786599 | 0.7738389242  |
| H  | -6.5515861982 | -1.8551232125 | 0.0687528484  |
| C  | -5.7516903629 | 0.5117088727  | -1.9401977035 |
| Br | -0.8014961143 | -3.3393337638 | -1.8673777124 |
| H  | -7.1900616148 | -1.0865508726 | -2.1421398597 |
| H  | -7.8494979692 | 0.3929568974  | -1.4382619122 |
| O  | -5.6702835554 | 1.0552991545  | -3.0089258039 |
| H  | 0.2236775821  | -2.3260248812 | 8.2430638637  |
| C  | 4.5085459385  | 0.1795198612  | -2.7109365011 |
| F  | 5.5767725033  | -0.6115687594 | -2.8381001024 |
| F  | 4.9258078443  | 1.3193870033  | -2.1402326628 |
| F  | 4.0872184707  | 0.4925428434  | -3.9386717407 |

(2S,4S)-CY5

01

|    |               |               |               |
|----|---------------|---------------|---------------|
| O  | -0.3794638183 | -0.1406105639 | 1.7507714701  |
| C  | -1.3335896929 | -0.7839061942 | 1.3673401025  |
| C  | -2.5609539145 | -2.3942328240 | 0.0816548469  |
| C  | -2.4684981124 | -1.2776909139 | 2.2098104704  |
| C  | -3.4873166130 | -1.9127944385 | 1.2436967705  |
| H  | -2.1271530811 | -3.3616298748 | 0.3698196625  |
| H  | -3.1098418315 | -2.5541564692 | -0.8559461376 |
| H  | -2.0123514257 | -2.0744338275 | 2.8260183392  |
| H  | -2.8395838273 | -0.5299176280 | 2.9203662481  |
| C  | -4.1991403029 | -3.0987271908 | 1.9105388046  |
| H  | -4.8189440702 | -2.7538131615 | 2.7514428970  |
| H  | -4.8582637216 | -3.6207183956 | 1.2024059398  |
| H  | -3.4698296912 | -3.8293430459 | 2.2942393061  |
| C  | -4.5459382160 | -0.9197202108 | 0.7405445959  |
| C  | -5.4409793752 | -1.3338165694 | -0.2577564547 |
| C  | -4.6728838862 | 0.3870060008  | 1.2234278324  |
| C  | -6.4136105257 | -0.4766204831 | -0.7616121972 |
| H  | -5.3768093950 | -2.3480436898 | -0.6602160497 |
| C  | -5.6456125763 | 1.2525383370  | 0.7187863928  |
| H  | -3.9994745727 | 0.7700199710  | 1.9906100725  |
| C  | -6.5191654749 | 0.8267651763  | -0.2759072008 |
| H  | -7.0922813991 | -0.8279037003 | -1.5417521279 |
| H  | -5.7102529041 | 2.2707367566  | 1.1076116278  |
| C  | -1.4403645399 | -1.3340042064 | -0.0639348490 |
| C  | -1.9424915546 | -0.2288997373 | -1.0164625308 |
| H  | -2.9103263247 | 0.1530207952  | -0.6789914090 |
| H  | -2.0849221538 | -0.6534415100 | -2.0180311994 |
| Mg | 1.2993056643  | 0.0854549218  | 0.3845070992  |
| O  | 2.7790244490  | -0.4651438966 | -1.0459337972 |
| O  | 2.6885975881  | -1.1975371977 | 1.3243097224  |
| P  | 3.5147504598  | -1.2201876324 | 0.0471485682  |
| O  | 3.7723456270  | -2.7690687342 | -0.3593286416 |
| O  | 4.9939096084  | -0.6254678217 | 0.2302463234  |
| C  | 5.7592740253  | -0.9781245971 | 1.3700142558  |
| H  | 6.0064417118  | -2.0524635273 | 1.3633880572  |
| H  | 6.6872328309  | -0.3945166324 | 1.3302299340  |
| H  | 5.2132107612  | -0.7409645636 | 2.2951193904  |
| C  | 4.4769965234  | -3.0601014078 | -1.5534513421 |
| H  | 4.4857551713  | -4.1509949211 | -1.6719630241 |
| H  | 3.9855177632  | -2.5982130215 | -2.4244263020 |
| H  | 5.5141004385  | -2.6929195576 | -1.4984360585 |
| O  | 1.8947041672  | 1.8633304221  | 0.9459264607  |
| C  | 1.8923057914  | 2.9632463691  | 0.3242495332  |
| C  | 2.7405152508  | 4.1312222622  | 0.8027898149  |
| N  | 1.1869894772  | 3.2193174075  | -0.7565958306 |
| C  | 2.4417255072  | 5.2004948385  | -0.2389590855 |
| H  | 3.7933512730  | 3.8158376357  | 0.8482105700  |
| H  | 2.4412564631  | 4.3985546203  | 1.8275043709  |
| C  | 1.4131697054  | 4.5243209651  | -1.1669528134 |
| Br | -0.7508502094 | 1.3023976264  | -1.1549537698 |
| H  | 2.0055366234  | 6.1233024795  | 0.1696978926  |
| H  | 3.3165023472  | 5.4949904834  | -0.8370857714 |
| O  | 0.8880005700  | 5.0668214246  | -2.1084371186 |
| H  | -7.2762035088 | 1.5052373087  | -0.6737265190 |
| N  | -0.0807372121 | -1.7817734017 | -0.4247873461 |
| C  | 0.3559443910  | -2.9519977533 | 0.3460767536  |
| H  | 0.2307733820  | -2.7842272870 | 1.4246893825  |
| H  | -0.1879783955 | -3.8687775733 | 0.0552345975  |
| H  | 1.4248298475  | -3.1202664629 | 0.1754815863  |
| C  | 0.1372118752  | -2.0358346427 | -1.8505272796 |

|   |               |               |               |
|---|---------------|---------------|---------------|
| H | 0.0235929785  | -1.1185846637 | -2.4399029772 |
| H | 1.1774778754  | -2.3578999937 | -1.9763935703 |
| H | -0.5372258210 | -2.8215538775 | -2.2410212890 |

EC2

0 1

|    |               |               |               |
|----|---------------|---------------|---------------|
| O  | 1.1551415629  | -0.4600184195 | -0.6175353191 |
| C  | 1.9685576686  | -0.9709461449 | 0.3509686476  |
| C  | 2.7650276986  | -2.2626838849 | -0.0650307196 |
| C  | 3.3386080162  | -0.2415792249 | 0.4642129439  |
| C  | 4.1064021037  | -1.5797780435 | 0.3045486529  |
| H  | 2.6428275164  | -2.4138292794 | -1.1464722211 |
| H  | 2.5415250497  | -3.1988677642 | 0.4701446126  |
| H  | 3.4371344494  | 0.3990838318  | -0.4210249251 |
| H  | 3.5603015201  | 0.3588849034  | 1.3594743983  |
| C  | 4.6939354920  | -2.1085538321 | 1.6178782177  |
| H  | 5.0919654962  | -3.1258222202 | 1.4778415374  |
| H  | 5.5212366018  | -1.4667185887 | 1.9601224811  |
| H  | 3.9323572200  | -2.1480710180 | 2.4102718500  |
| C  | 5.1892573437  | -1.6031777882 | -0.7553239292 |
| C  | 6.0379922883  | -0.5058456580 | -0.9388187593 |
| C  | 5.4106843445  | -2.7469742712 | -1.5306158564 |
| C  | 7.0723748044  | -0.5457011871 | -1.8724080398 |
| H  | 5.8841528999  | 0.3975225594  | -0.3424293182 |
| C  | 6.4428844428  | -2.7921618171 | -2.4661978164 |
| H  | 4.7610789460  | -3.6169240636 | -1.4015068307 |
| C  | 7.2784042534  | -1.6899182423 | -2.6417648119 |
| H  | 7.7203556490  | 0.3245420665  | -2.0017050588 |
| H  | 6.5939658613  | -3.6940786563 | -3.0641775440 |
| C  | 1.1871415332  | -1.1656312600 | 1.6594234757  |
| C  | 1.6250728565  | -0.7516828852 | 2.8621911062  |
| H  | 2.5884233062  | -0.2548680280 | 2.9825148227  |
| H  | 1.0641813544  | -0.9477048011 | 3.7789341515  |
| C  | -0.1522544188 | -1.8224262834 | 1.5268673489  |
| C  | -0.4427596212 | -2.6885181715 | 0.4554282500  |
| C  | -1.1778156650 | -1.5716668773 | 2.4516936921  |
| C  | -1.6933785771 | -3.2889611370 | 0.3322147499  |
| H  | 0.3160688821  | -2.8914246406 | -0.2990524143 |
| C  | -2.4237661445 | -2.1805133867 | 2.3366272717  |
| H  | -1.0121420177 | -0.8653697541 | 3.2668704307  |
| C  | -2.6875933192 | -3.0437098546 | 1.2764922603  |
| H  | -1.8921476849 | -3.9462547631 | -0.5162611616 |
| H  | -3.1993708845 | -1.9606020483 | 3.0737645818  |
| H  | -3.6674953831 | -3.5154327701 | 1.1772813739  |
| Mg | -0.5618462741 | 0.1266241093  | -0.9304153022 |
| O  | -2.5210623056 | 0.3883663373  | -0.0525369095 |
| O  | -1.9800904290 | -0.4842394949 | -2.3088585808 |
| P  | -3.1107437787 | -0.0870004200 | -1.3704310176 |
| O  | -4.1554363330 | -1.2941421612 | -1.2299385458 |
| O  | -4.0044443990 | 1.1226149149  | -1.9775785055 |
| C  | -4.5195502508 | 1.0025257640  | -3.2951172917 |
| H  | -5.2370220681 | 0.1692779073  | -3.3618648191 |
| H  | -5.0352044105 | 1.9416538636  | -3.5315619603 |
| H  | -3.7068619707 | 0.8342877545  | -4.0176661990 |
| C  | -5.2054492232 | -1.2011245091 | -0.2813942330 |
| H  | -5.7432526489 | -2.1569714365 | -0.2991522317 |
| H  | -4.8029541982 | -1.0233570886 | 0.7273127937  |
| H  | -5.9017105907 | -0.3881146775 | -0.5436783339 |
| O  | -0.6570582331 | 2.2063117640  | -1.1748797636 |
| C  | -1.2628542393 | 2.9621512494  | -0.4323728435 |

|    |               |               |               |
|----|---------------|---------------|---------------|
| C  | -2.3551355668 | 3.9166639670  | -0.8278163359 |
| N  | -1.0830535505 | 3.0449402513  | 0.9195751425  |
| C  | -2.7423803732 | 4.6386546356  | 0.4630848637  |
| H  | -3.1607722329 | 3.2855298586  | -1.2366315372 |
| H  | -1.9992381558 | 4.5708192140  | -1.6352381683 |
| C  | -1.9453056872 | 3.9628948953  | 1.5647865165  |
| Br | 0.0316204245  | 1.8842570431  | 1.8177294314  |
| H  | -2.4817870200 | 5.7070914818  | 0.4616796909  |
| H  | -3.8099311565 | 4.5643597020  | 0.7098977706  |
| O  | -1.9882015383 | 4.1389875294  | 2.7427644838  |
| H  | 8.0857187643  | -1.7218250506 | -3.3768292459 |

EC3

01

|    |               |               |               |
|----|---------------|---------------|---------------|
| O  | 1.1150658508  | -1.0244704948 | -0.7587422367 |
| C  | 1.9220155910  | -1.4737967281 | 0.2443870991  |
| C  | 2.6645869831  | -2.8319347250 | -0.0231338426 |
| C  | 3.3196894747  | -0.8006993474 | 0.2931778050  |
| C  | 4.0232163110  | -2.1858146096 | 0.3555549131  |
| H  | 2.6092692267  | -3.0570535076 | -1.0976439844 |
| H  | 2.3344712720  | -3.7116148999 | 0.5473798400  |
| H  | 3.4826413531  | -0.3153361102 | -0.6779445695 |
| H  | 3.5308356998  | -0.0698617746 | 1.0876722344  |
| C  | 5.1335065747  | -2.3903864532 | -0.6783155261 |
| H  | 6.0091396658  | -1.7636097803 | -0.4463623716 |
| H  | 5.4661384336  | -3.4404116448 | -0.6918043252 |
| H  | 4.7787512663  | -2.1266481494 | -1.6865998095 |
| C  | 4.5681896790  | -2.5450986770 | 1.7310578977  |
| C  | 4.3588008291  | -3.7967666656 | 2.3172325934  |
| C  | 5.3699313964  | -1.6257532323 | 2.4217180065  |
| C  | 4.9105632858  | -4.1136264895 | 3.5587087894  |
| H  | 3.7507260486  | -4.5425396070 | 1.8018333342  |
| C  | 5.9228550716  | -1.9349900927 | 3.6618515430  |
| H  | 5.5622920883  | -0.6440909313 | 1.9800628279  |
| C  | 5.6907082283  | -3.1827586653 | 4.2402464340  |
| H  | 4.7246343444  | -5.0971363181 | 3.9967527095  |
| H  | 6.5384772130  | -1.1963972253 | 4.1808781500  |
| C  | 1.1726397361  | -1.5336480644 | 1.5874876910  |
| C  | 1.6983053954  | -1.1267677862 | 2.7578997118  |
| H  | 2.7140545629  | -0.7370004089 | 2.8312284777  |
| H  | 1.1607428339  | -1.2524946602 | 3.7007175106  |
| C  | -0.2177009922 | -2.0776454099 | 1.5256998687  |
| C  | -0.6166705525 | -2.9653776876 | 0.5136561791  |
| C  | -1.1993593023 | -1.7030622715 | 2.4616720289  |
| C  | -1.9182846699 | -3.4575297669 | 0.4303303257  |
| H  | 0.0994053977  | -3.2761927490 | -0.2462340971 |
| C  | -2.4924078589 | -2.1943433698 | 2.4014766909  |
| H  | -0.9544540716 | -0.9811004159 | 3.2428310089  |
| C  | -2.8696242665 | -3.0728088338 | 1.3780891633  |
| H  | -2.1743116209 | -4.1258905136 | -0.3906351128 |
| H  | -3.2451622362 | -1.8862722207 | 3.1290716600  |
| Mg | -0.5811915618 | -0.3037636134 | -0.9332022445 |
| O  | -2.4258192495 | 0.3010973015  | 0.0378449509  |
| O  | -2.1819880255 | -0.8709176566 | -2.1347369105 |
| P  | -3.1700253579 | -0.2148466457 | -1.1809297525 |
| O  | -4.3680614196 | -1.2279343238 | -0.8387763224 |
| O  | -3.9279182987 | 1.0436447557  | -1.8683274783 |
| C  | -4.5508974960 | 0.8670904515  | -3.1310731403 |
| H  | -5.3923572872 | 0.1596347428  | -3.0585650742 |
| H  | -4.9305886853 | 1.8462646065  | -3.4486611927 |



|    |               |               |               |
|----|---------------|---------------|---------------|
| H  | -3.8297861602 | 0.4921795507  | -3.8729863234 |
| C  | -5.3160438537 | -0.8581022373 | 0.1542777514  |
| H  | -6.0444075755 | -1.6737729483 | 0.2257341052  |
| H  | -4.8226916657 | -0.7256178345 | 1.1279303849  |
| H  | -5.8319730727 | 0.0734069583  | -0.1287020607 |
| O  | -0.4643033066 | 1.7466422870  | -1.3800254394 |
| C  | -0.9001613464 | 2.6351397112  | -0.6657145952 |
| C  | -1.8736391348 | 3.7072188455  | -1.0718384557 |
| N  | -0.6127922663 | 2.7899424760  | 0.6611485986  |
| C  | -2.0547864931 | 4.5749838043  | 0.1736541541  |
| H  | -2.7888671348 | 3.1708949285  | -1.3703784316 |
| H  | -1.4927725658 | 4.2377427543  | -1.9549525267 |
| C  | -1.2855229097 | 3.8700747087  | 1.2774248828  |
| Br | 0.3814507630  | 1.5375679969  | 1.5861109455  |
| H  | -1.6404256855 | 5.5878520359  | 0.0643963128  |
| H  | -3.1002958392 | 4.6836053772  | 0.4916418933  |
| O  | -1.2185465269 | 4.1382849687  | 2.4370842066  |
| H  | 6.1181107838  | -3.4278184246 | 5.2150399748  |
| O  | -4.1552872422 | -3.4824009829 | 1.3766603156  |
| C  | -4.5983763352 | -4.3042186901 | 0.3278071226  |
| H  | -5.6616763418 | -4.5018977847 | 0.5133848068  |
| H  | -4.4849887094 | -3.8006970431 | -0.6470284318 |
| H  | -4.0598146820 | -5.2674194490 | 0.3085545454  |

#### EC4

0 1

|   |               |               |               |
|---|---------------|---------------|---------------|
| O | -1.1905436972 | -0.3311755444 | 0.5427259828  |
| C | -2.0693949327 | -0.2040920775 | -0.4919184498 |
| C | -3.2773048384 | -1.2113940051 | -0.4596037481 |
| C | -3.1034197311 | 0.9428189795  | -0.3015297678 |
| C | -4.2860257629 | -0.0362646568 | -0.5238674299 |
| H | -3.2758230256 | -1.7253112022 | 0.5115084320  |
| H | -3.3515702354 | -1.9505606471 | -1.2725633519 |
| H | -3.0322023442 | 1.2742772650  | 0.7419451514  |
| H | -3.0564509241 | 1.8273161097  | -0.9547941346 |
| C | -4.9439388684 | 0.1003637628  | -1.9014908064 |
| H | -5.6691302909 | -0.7126519749 | -2.0620004142 |
| H | -5.4857049482 | 1.0561380799  | -1.9807371802 |
| H | -4.1985224750 | 0.0538473722  | -2.7088413466 |
| C | -5.3693045103 | -0.0204157581 | 0.5358958272  |
| C | -5.8068230774 | 1.1847250092  | 1.0963983364  |
| C | -6.0047073538 | -1.2028177006 | 0.9312815789  |
| C | -6.8423511849 | 1.2090373244  | 2.0292188514  |
| H | -5.3263498632 | 2.1210653346  | 0.7999544051  |
| C | -7.0401445044 | -1.1845040131 | 1.8642099177  |
| H | -5.6812938369 | -2.1556392857 | 0.5034875711  |
| C | -7.4628639007 | 0.0228903112  | 2.4184501633  |
| H | -7.1648803282 | 2.1612532949  | 2.4571145183  |
| H | -7.5183169587 | -2.1206227011 | 2.1621740879  |
| C | -1.3226992657 | -0.2353484131 | -1.8328218057 |
| C | -1.5300041143 | 0.6445235678  | -2.8291589401 |
| H | -2.2655075107 | 1.4450963292  | -2.7433798072 |
| H | -1.0171051629 | 0.5605268324  | -3.7900541098 |
| C | -0.2964519336 | -1.3146001250 | -1.9862458990 |
| C | -0.3804682562 | -2.5165106151 | -1.2599793599 |
| C | 0.7972633817  | -1.1561658125 | -2.8498874776 |
| C | 0.5576476270  | -3.5283432633 | -1.4288184902 |
| H | -1.1888626532 | -2.6647424534 | -0.5461151087 |
| C | 1.7330430218  | -2.1672717731 | -3.0317882831 |
| H | 0.9382801301  | -0.2149245118 | -3.3827513993 |

|    |               |               |               |
|----|---------------|---------------|---------------|
| C  | 1.6092063523  | -3.3643897894 | -2.3302113230 |
| H  | 0.4696795588  | -4.4503577356 | -0.8522929646 |
| H  | 2.5690734801  | -2.0172974272 | -3.7165158256 |
| Mg | 0.5778008150  | -0.3342484064 | 1.0362540487  |
| O  | 2.5225252389  | -0.5406736199 | 0.1471959794  |
| O  | 1.6416848934  | -1.7098879627 | 2.1439388518  |
| P  | 2.8751502343  | -1.5000442926 | 1.2751038584  |
| O  | 3.4488750310  | -2.9105434977 | 0.7909242963  |
| O  | 4.0992413613  | -0.8462451490 | 2.1138773655  |
| C  | 4.5060841370  | -1.4628674077 | 3.3270724074  |
| H  | 4.9106887271  | -2.4699596509 | 3.1392495696  |
| H  | 5.2917495375  | -0.8349043583 | 3.7653454863  |
| H  | 3.6605909454  | -1.5409783618 | 4.0269864010  |
| C  | 4.5421572675  | -2.9506605665 | -0.1156439250 |
| H  | 4.7563565716  | -4.0058254370 | -0.3150164706 |
| H  | 4.2804062938  | -2.4495573914 | -1.0588521300 |
| H  | 5.4307536655  | -2.4665392456 | 0.3200770455  |
| O  | 1.3256609622  | 1.4561128799  | 1.8029550585  |
| C  | 2.1910763236  | 2.1307477977  | 1.2657390311  |
| C  | 3.5135583971  | 2.5259351499  | 1.8608582051  |
| N  | 2.1264642859  | 2.6152391082  | -0.0086263107 |
| C  | 4.1881424725  | 3.3920263095  | 0.7964086782  |
| H  | 4.0413944238  | 1.5773457638  | 2.0520328846  |
| H  | 3.3516661285  | 3.0210576471  | 2.8278267675  |
| C  | 3.2794780742  | 3.3287730765  | -0.4181560206 |
| Br | 0.7471852190  | 2.1610854748  | -1.1435444601 |
| H  | 4.2882118404  | 4.4469464515  | 1.0908690396  |
| H  | 5.1863219176  | 3.0394753136  | 0.5042587142  |
| O  | 3.4441170116  | 3.7779285797  | -1.5093367357 |
| H  | -8.2715691227 | 0.0390580658  | 3.1524334725  |
| C  | 2.5542285883  | -4.5045264436 | -2.5950728844 |
| F  | 2.7892189805  | -5.2313223233 | -1.4957998178 |
| F  | 3.7419174340  | -4.0811011081 | -3.0522551358 |
| F  | 2.0640994518  | -5.3434989719 | -3.5152394506 |

EC5

0 1

|   |               |               |               |
|---|---------------|---------------|---------------|
| O | -0.8878564081 | -0.6009694701 | 1.9509394368  |
| C | -2.0094976799 | -0.5485706783 | 1.1721795554  |
| C | -3.1255272467 | -1.6021223533 | 1.5043114982  |
| C | -3.0239777245 | 0.5567758901  | 1.5740684017  |
| C | -4.1845041036 | -0.4755481938 | 1.6390517504  |
| H | -2.8940675400 | -2.0690556682 | 2.4717928885  |
| H | -3.3146849907 | -2.3872265567 | 0.7589590252  |
| H | -2.7428313090 | 0.9121568623  | 2.5739093645  |
| H | -3.1382664134 | 1.4260152716  | 0.9104231684  |
| C | -4.9527157177 | -0.4867111278 | 2.9633360796  |
| H | -5.5526425694 | 0.4300058218  | 3.0778589888  |
| H | -5.6397496446 | -1.3464573019 | 3.0099852638  |
| H | -4.2573268635 | -0.5522718676 | 3.8142086119  |
| C | -5.1865030546 | -0.3707702965 | 0.4981664224  |
| C | -5.6736397580 | -1.4988759275 | -0.1694529351 |
| C | -5.7084669553 | 0.8786561067  | 0.1367587003  |
| C | -6.6306477292 | -1.3839893842 | -1.1775868696 |
| H | -5.3017093079 | -2.4898272721 | 0.0991585852  |
| C | -6.6632368647 | 1.0007615776  | -0.8702432120 |
| H | -5.3588964454 | 1.7763582356  | 0.6537520407  |
| C | -7.1260683921 | -0.1328272936 | -1.5376012308 |
| H | -6.9898611032 | -2.2816708180 | -1.6864340025 |
| H | -7.0485233834 | 1.9881849689  | -1.1354788115 |

|    |               |               |               |
|----|---------------|---------------|---------------|
| C  | -1.6411139625 | -0.5594157471 | -0.3288788732 |
| C  | -2.2962656925 | 0.1005135119  | -1.2935984801 |
| H  | -3.1779158344 | 0.6958220482  | -1.0602055503 |
| H  | -2.0140035310 | 0.0370466170  | -2.3449817262 |
| Mg | 0.8095354793  | -0.5953518361 | 1.1483609643  |
| O  | 3.2465610391  | -0.0244312646 | -0.8868114351 |
| O  | 2.3447935372  | -1.7558797636 | 0.8246815915  |
| P  | 3.4190638524  | -1.3352715103 | -0.1832029118 |
| O  | 3.5224533466  | -2.5817804574 | -1.2127105023 |
| O  | 4.8573485720  | -1.3210340233 | 0.5656085372  |
| C  | 5.2259321855  | -2.3995793702 | 1.4055482132  |
| H  | 5.2302567036  | -3.3502315885 | 0.8482502154  |
| H  | 6.2386340556  | -2.1955182124 | 1.7760318285  |
| H  | 4.5336400857  | -2.4917114754 | 2.2561564572  |
| C  | 4.3619524702  | -2.4648498463 | -2.3467463738 |
| H  | 4.1931401161  | -3.3500122338 | -2.9729796450 |
| H  | 4.1237735682  | -1.5552368645 | -2.9193186876 |
| H  | 5.4231657328  | -2.4308833701 | -2.0501222337 |
| O  | 1.9362944361  | 1.0673045461  | 1.6066597177  |
| C  | 2.5800494095  | 1.8179157829  | 0.8871136721  |
| C  | 4.0404941502  | 2.1539661411  | 0.9928622532  |
| N  | 2.0489664109  | 2.5396551227  | -0.1424982393 |
| C  | 4.3631252323  | 2.8223211240  | -0.3438720131 |
| H  | 4.6019661559  | 1.2301027190  | 1.1804711559  |
| H  | 4.1716737296  | 2.8268442044  | 1.8551472164  |
| C  | 3.0249433626  | 3.1547496648  | -0.9698221422 |
| Br | 0.2946926003  | 2.3317925809  | -0.6356124856 |
| H  | 4.9876397461  | 3.7222957939  | -0.2821880078 |
| H  | 4.8395570629  | 2.1012927137  | -1.0242839584 |
| O  | 2.7752735287  | 3.7735114924  | -1.9568761917 |
| H  | -7.8713912397 | -0.0409696451 | -2.3306620215 |
| N  | -0.4432635641 | -1.3139329490 | -0.5964290842 |
| C  | -0.5716676497 | -2.7388705812 | -0.2316526796 |
| H  | -0.8923511604 | -2.8385304835 | 0.8121724438  |
| H  | -1.3053082720 | -3.2433988596 | -0.8853026043 |
| H  | 0.4098782694  | -3.2192403178 | -0.3437276448 |
| C  | 0.1059957231  | -1.2045202716 | -1.9449675287 |
| H  | 0.3065100339  | -0.1556745836 | -2.1950869317 |
| H  | 1.0564708688  | -1.7526368428 | -1.9795727453 |
| H  | -0.5753183534 | -1.6349724901 | -2.7020292894 |

EP2

0 1

|   |               |               |               |
|---|---------------|---------------|---------------|
| O | -0.4468264800 | 0.3314510940  | -0.5627767075 |
| C | 0.8161418656  | 0.5711350691  | 0.0308177516  |
| C | 1.7481340124  | -0.5257045336 | 0.5014833523  |
| C | 1.9411516581  | 1.3124840991  | -0.6608533190 |
| C | 2.9330572315  | 0.4280710868  | 0.1591141647  |
| H | 1.6880930351  | -1.3895751465 | -0.1757870592 |
| H | 1.6519288516  | -0.8616502776 | 1.5432919435  |
| H | 1.9596338189  | 1.0765201317  | -1.7345742871 |
| H | 1.9881800757  | 2.4014015612  | -0.5170636755 |
| C | 3.4431919312  | 1.1652435688  | 1.4003404790  |
| H | 3.9778840380  | 0.4713789390  | 2.0663807521  |
| H | 4.1391092324  | 1.9679933996  | 1.1131467915  |
| H | 2.6108459950  | 1.6096580600  | 1.9682480583  |
| C | 4.0869709218  | -0.1774248478 | -0.6079048229 |
| C | 4.7997674535  | 0.5861883162  | -1.5387431251 |
| C | 4.5021445826  | -1.4903087477 | -0.3645649454 |
| C | 5.8952575185  | 0.0511879406  | -2.2134369619 |

|    |               |               |               |
|----|---------------|---------------|---------------|
| H  | 4.4919500088  | 1.6158645597  | -1.7413483788 |
| C  | 5.5981894255  | -2.0292139918 | -1.0364388985 |
| H  | 3.9579621717  | -2.1040479465 | 0.3580145386  |
| C  | 6.2982779648  | -1.2601626077 | -1.9643063225 |
| H  | 6.4360123419  | 0.6614182286  | -2.9403292799 |
| H  | 5.9046145892  | -3.0583842604 | -0.8362429872 |
| C  | -0.4155502738 | 1.1069310056  | 0.6579778220  |
| C  | -0.9921012668 | 0.3538484762  | 1.8393980308  |
| H  | -0.9457483226 | -0.7257867849 | 1.6510232282  |
| H  | -2.0352019189 | 0.6375347188  | 2.0359850463  |
| C  | -0.8247800408 | 2.5367462106  | 0.4365738821  |
| C  | -0.8152358934 | 3.0685895573  | -0.8600522280 |
| C  | -1.2596410189 | 3.3422164898  | 1.4933235792  |
| C  | -1.2175553676 | 4.3813495990  | -1.0913468851 |
| H  | -0.5159271592 | 2.4380882039  | -1.6989012752 |
| C  | -1.6598225566 | 4.6568649498  | 1.2597237778  |
| H  | -1.2992214835 | 2.9472980647  | 2.5085624449  |
| C  | -1.6387238053 | 5.1825739970  | -0.0302659955 |
| H  | -1.2060654042 | 4.7776882569  | -2.1090645683 |
| H  | -2.0002291273 | 5.2694394270  | 2.0967838229  |
| H  | -1.9561083856 | 6.2118967672  | -0.2101168518 |
| Mg | -1.9481578780 | -0.9257316910 | -1.1793968216 |
| O  | -1.7501681477 | -2.4815709978 | 0.2195295427  |
| O  | -0.8391596160 | -2.4435951172 | -2.0716585567 |
| P  | -0.9157836808 | -3.2619382643 | -0.7893120650 |
| O  | 0.5800134738  | -3.5516081781 | -0.2619125841 |
| O  | -1.5470762466 | -4.7197537495 | -0.9994148019 |
| C  | -1.0549034493 | -5.5604798942 | -2.0320974746 |
| H  | -0.0083226533 | -5.8467127268 | -1.8410100283 |
| H  | -1.6811505803 | -6.4606520186 | -2.0416851179 |
| H  | -1.1174278139 | -5.0561677239 | -3.0080527544 |
| C  | 0.7755170185  | -4.1067702815 | 1.0283445850  |
| H  | 1.8583586160  | -4.1884161737 | 1.1852334261  |
| H  | 0.3382349002  | -3.4604137994 | 1.8049375819  |
| H  | 0.3221750836  | -5.1081503471 | 1.1001140057  |
| O  | -2.8533258168 | 0.2549613796  | -2.6679681808 |
| C  | -3.4349393436 | 0.9275216053  | -1.7883088211 |
| C  | -4.2228030285 | 2.1996158072  | -1.9835374989 |
| N  | -3.3562368381 | 0.5403719977  | -0.5105722392 |
| C  | -4.5478688256 | 2.6012307886  | -0.5452988093 |
| H  | -5.1048179300 | 1.9886611006  | -2.6061805472 |
| H  | -3.6053233039 | 2.9282841681  | -2.5279726764 |
| C  | -3.9777960062 | 1.4635031514  | 0.3108344252  |
| Br | 0.0154390356  | 0.6746256291  | 3.4795251082  |
| H  | -4.0473951449 | 3.5312101276  | -0.2358373016 |
| H  | -5.6200125540 | 2.7203228947  | -0.3362001149 |
| O  | -4.0282640601 | 1.4135327511  | 1.5175679438  |
| H  | 7.1543455708  | -1.6825170717 | -2.4947021160 |

EP3

0 1

|   |               |               |               |
|---|---------------|---------------|---------------|
| O | -2.0049647340 | -0.9651705384 | -2.7461223143 |
| C | -1.4991322749 | -0.2082587416 | -1.6521221536 |
| C | -1.6832604647 | 1.2911596544  | -1.5742968415 |
| C | -1.8690407907 | -0.3908706016 | -0.1943060186 |
| C | -1.7362568479 | 1.1568651464  | -0.0200551026 |
| H | -2.6611293530 | 1.5698350036  | -1.9907365593 |
| H | -0.8961846110 | 1.9135658280  | -2.0188970813 |
| H | -2.9031961357 | -0.7468314475 | -0.0904014338 |
| H | -1.1937616171 | -1.0248743685 | 0.3947087282  |

|    |               |               |               |
|----|---------------|---------------|---------------|
| C  | -2.9483046567 | 1.8238410565  | 0.6297341420  |
| H  | -3.0087642585 | 1.5604897671  | 1.6969345718  |
| H  | -2.8713125185 | 2.9200961713  | 0.5582116785  |
| H  | -3.8752982335 | 1.4956161640  | 0.1357010948  |
| C  | -0.4600590137 | 1.5871741200  | 0.6890593554  |
| C  | 0.2745832358  | 2.6981351662  | 0.2615142299  |
| C  | -0.0352780261 | 0.9246718362  | 1.8471823123  |
| C  | 1.4074957754  | 3.1221683473  | 0.9542222374  |
| H  | -0.0364160159 | 3.2481790469  | -0.6291732262 |
| C  | 1.0955798478  | 1.3443512156  | 2.5441941914  |
| H  | -0.5985632292 | 0.0641822357  | 2.2170593001  |
| C  | 1.8258850694  | 2.4440951242  | 2.0968746493  |
| H  | 1.9679185080  | 3.9879737651  | 0.5944094550  |
| H  | 1.4088284823  | 0.8063645407  | 3.4417824410  |
| C  | -0.5798255380 | -0.9944403924 | -2.5030171562 |
| C  | 0.1768167205  | -0.2547340649 | -3.5799071786 |
| H  | -0.4571648848 | 0.5403681570  | -3.9855932130 |
| H  | 0.4726651868  | -0.9242680134 | -4.3978349204 |
| C  | -0.0951288521 | -2.3514300413 | -2.0780443053 |
| C  | -0.9324497318 | -3.1995809828 | -1.3314674997 |
| C  | 1.1215789108  | -2.8656573435 | -2.5223791250 |
| C  | -0.5853326344 | -4.5158511669 | -1.0808391813 |
| H  | -1.8999743714 | -2.8498548428 | -0.9612279444 |
| C  | 1.4896778566  | -4.1876925775 | -2.2690962283 |
| H  | 1.8047184589  | -2.2470479306 | -3.1039987687 |
| C  | 0.6253749352  | -5.0300312833 | -1.5650252669 |
| H  | -1.2568173202 | -5.1778629252 | -0.5328408154 |
| H  | 2.4449088862  | -4.5475760837 | -2.6506962773 |
| Mg | -3.3304478440 | -2.4836747419 | -3.2527361047 |
| O  | -4.9514809799 | -1.3035731982 | -3.7324822008 |
| O  | -4.3872707423 | -2.0490195969 | -1.4372451950 |
| P  | -5.3138509193 | -1.1660652655 | -2.2587760926 |
| O  | -5.1500691564 | 0.3560646033  | -1.7357383134 |
| O  | -6.8697021763 | -1.4856086891 | -2.0518289838 |
| C  | -7.3950052038 | -1.6208386702 | -0.7407941056 |
| H  | -7.3442271998 | -0.6645719506 | -0.1955348239 |
| H  | -8.4440292419 | -1.9238829664 | -0.8426780205 |
| H  | -6.8428878900 | -2.3874314998 | -0.1767580188 |
| C  | -5.7683655170 | 1.4141515734  | -2.4503399131 |
| H  | -5.4706064494 | 2.3510398192  | -1.9622964680 |
| H  | -5.4374750663 | 1.4217196792  | -3.4998770604 |
| H  | -6.8656869451 | 1.3222779313  | -2.4197561088 |
| O  | -3.3547902858 | -4.6018947285 | -3.3052207680 |
| C  | -2.3496686846 | -4.5934000342 | -4.0454828717 |
| C  | -1.5042186069 | -5.7748578900 | -4.4542722844 |
| N  | -1.8925655128 | -3.4240946610 | -4.5121698240 |
| C  | -0.4075087222 | -5.1128385820 | -5.2884397219 |
| H  | -2.1212083622 | -6.5044089921 | -4.9981445112 |
| H  | -1.1332352636 | -6.2724113432 | -3.5456631370 |
| C  | -0.7123213491 | -3.6095962005 | -5.2024736903 |
| Br | 1.7640706731  | 0.6119100086  | -2.8590410703 |
| H  | 0.6070871247  | -5.2835525613 | -4.9024348755 |
| H  | -0.4105903430 | -5.4158431344 | -6.3456502405 |
| O  | -0.0065213385 | -2.7367151193 | -5.6525971370 |
| H  | 2.7163951510  | 2.7715951938  | 2.6376204259  |
| O  | 0.8557727078  | -6.3371349537 | -1.3276335108 |
| C  | 2.0462872360  | -6.9144056510 | -1.7937211932 |
| H  | 2.0229838832  | -7.9685747517 | -1.4930018881 |
| H  | 2.1243283845  | -6.8585941304 | -2.8936596056 |
| H  | 2.9347900201  | -6.4350131770 | -1.3482103819 |

EP4

0 1

|    |               |               |               |
|----|---------------|---------------|---------------|
| O  | -0.2694501292 | 0.3200916031  | -0.4736867824 |
| C  | -0.7452519372 | -0.9144224632 | 0.0317907556  |
| C  | -2.1434565354 | -1.1218903760 | 0.5736986006  |
| C  | -0.8069342348 | -2.1878424681 | -0.7855450915 |
| C  | -2.0438485919 | -2.5963254842 | 0.0760278662  |
| H  | -2.8639988804 | -0.5238638856 | -0.0021013359 |
| H  | -2.3002162254 | -0.9587196963 | 1.6489951786  |
| H  | -1.0782133362 | -1.9677028452 | -1.8280387481 |
| H  | 0.0734826448  | -2.8458908751 | -0.7598405140 |
| C  | -1.6474516732 | -3.5496535363 | 1.2066218923  |
| H  | -2.4804660669 | -3.6718446599 | 1.9151087327  |
| H  | -1.3935721067 | -4.5416712185 | 0.8034869913  |
| H  | -0.7790984215 | -3.1656026838 | 1.7647194146  |
| C  | -3.2382759919 | -3.1364761783 | -0.6778516803 |
| C  | -3.0647823616 | -4.0608373905 | -1.7137514817 |
| C  | -4.5396870962 | -2.7699269452 | -0.3215201638 |
| C  | -4.1623166060 | -4.6011791735 | -2.3807329510 |
| H  | -2.0547673925 | -4.3621617819 | -2.0056005614 |
| C  | -5.6405619397 | -3.3089796012 | -0.9853953923 |
| H  | -4.6971296527 | -2.0481256213 | 0.4841891177  |
| C  | -5.4554175084 | -4.2261284260 | -2.0183200085 |
| H  | -4.0066021163 | -5.3178089807 | -3.1902282655 |
| H  | -6.6495965627 | -3.0070525311 | -0.6959379187 |
| C  | 0.4262757136  | -0.2535524234 | 0.6543686508  |
| C  | 0.2098894905  | 0.5292006454  | 1.9329209902  |
| H  | -0.7164165163 | 1.1119934194  | 1.8589653304  |
| H  | 1.0473716567  | 1.2113646828  | 2.1363183358  |
| C  | 1.8237902452  | -0.6776328636 | 0.2981565302  |
| C  | 2.1780876540  | -0.8277525982 | -1.0491008921 |
| C  | 2.8025520995  | -0.8581042936 | 1.2781826210  |
| C  | 3.4829564715  | -1.1400737069 | -1.4089310998 |
| H  | 1.4312308132  | -0.6619464359 | -1.8265021512 |
| C  | 4.1110713485  | -1.1703839380 | 0.9209529207  |
| H  | 2.5593344306  | -0.7345305919 | 2.3331449329  |
| C  | 4.4557020958  | -1.3038119513 | -0.4218015157 |
| H  | 3.7480788060  | -1.2463531165 | -2.4622917790 |
| H  | 4.8688836178  | -1.2935454646 | 1.6956014192  |
| Mg | -0.4566979329 | 2.3251089254  | -0.8956719260 |
| O  | -1.7377125143 | 2.9356159808  | 0.6483073719  |
| O  | -2.3991326549 | 2.3147407790  | -1.6446114137 |
| P  | -2.9295064382 | 2.7484191133  | -0.2843150086 |
| O  | -3.9640977271 | 1.6352035874  | 0.2535155928  |
| O  | -3.7922683971 | 4.0970443361  | -0.3338380373 |
| C  | -4.8424383685 | 4.2310327500  | -1.2802502166 |
| H  | -5.6515440159 | 3.5123820169  | -1.0740122782 |
| H  | -5.2317037181 | 5.2520012189  | -1.1878210681 |
| H  | -4.4685277582 | 4.0688624962  | -2.3022626961 |
| C  | -4.4331731482 | 1.6964366526  | 1.5906480979  |
| H  | -5.1037044552 | 0.8406778857  | 1.7382280281  |
| H  | -3.5967643851 | 1.6363836598  | 2.3040427937  |
| H  | -4.9904323791 | 2.6292112217  | 1.7713658032  |
| O  | 0.9208471667  | 2.5909106793  | -2.4599228398 |
| C  | 1.8672272316  | 2.5949458295  | -1.6413006587 |
| C  | 3.3439964307  | 2.5937290987  | -1.9508612026 |
| N  | 1.5973731938  | 2.5658681691  | -0.3320752407 |
| C  | 3.9678251859  | 2.5119773617  | -0.5576926280 |
| H  | 3.6016035247  | 3.5015994934  | -2.5154266514 |

|    |               |               |               |
|----|---------------|---------------|---------------|
| H  | 3.5761838756  | 1.7344798543  | -2.5968767123 |
| C  | 2.7692634718  | 2.4900504246  | 0.3990953559  |
| Br | 0.0162740365  | -0.6373997322 | 3.4839738942  |
| H  | 4.5597338527  | 1.5990966464  | -0.3993404809 |
| H  | 4.6161889518  | 3.3631957927  | -0.3062675793 |
| O  | 2.8430165629  | 2.3851071991  | 1.6013741164  |
| H  | -6.3167822995 | -4.6458138088 | -2.5421756761 |
| C  | 5.8905544924  | -1.5297900466 | -0.8204155425 |
| F  | 6.5875251239  | -2.1476198422 | 0.1344707949  |
| F  | 6.5069889029  | -0.3623888213 | -1.0660513017 |
| F  | 5.9888959838  | -2.2613520669 | -1.9339486380 |

EP5

0 1

|    |               |               |               |
|----|---------------|---------------|---------------|
| O  | -0.2105845477 | -0.6185287972 | 0.6266098791  |
| C  | -1.5658562225 | -0.1528154423 | 0.6921164271  |
| C  | -2.4842498271 | -0.4192217147 | 1.8696388400  |
| C  | -2.0062942061 | 1.2987898677  | 0.6271686198  |
| C  | -3.2237795603 | 0.9116296137  | 1.5329514152  |
| H  | -1.9312848881 | -0.3419951935 | 2.8170013972  |
| H  | -3.0723433397 | -1.3464463057 | 1.8600871919  |
| H  | -1.2794585140 | 1.9337541770  | 1.1556085703  |
| H  | -2.2361780030 | 1.7285763031  | -0.3548950741 |
| C  | -3.4393682836 | 1.8352624815  | 2.7245507994  |
| H  | -3.6755409044 | 2.8615583844  | 2.4063761316  |
| H  | -4.2577014984 | 1.4773991229  | 3.3682620958  |
| H  | -2.5219732570 | 1.8883428526  | 3.3287458287  |
| C  | -4.4720242800 | 0.6956117306  | 0.6810335478  |
| C  | -4.5907178372 | -0.4174810861 | -0.1685693236 |
| C  | -5.5143285800 | 1.6309652847  | 0.6707023780  |
| C  | -5.7004384739 | -0.5792514751 | -0.9953040207 |
| H  | -3.8162230419 | -1.1885152963 | -0.1906611138 |
| C  | -6.6269796898 | 1.4694897480  | -0.1547503570 |
| H  | -5.4689340180 | 2.5089070990  | 1.3161060293  |
| C  | -6.7261064466 | 0.3641379123  | -0.9949866247 |
| H  | -5.7648948185 | -1.4579625005 | -1.6414278039 |
| H  | -7.4231022575 | 2.2172595919  | -0.1362698293 |
| C  | -1.1465336538 | -1.1050801483 | -0.3517461110 |
| C  | -0.8877341145 | -0.6558801546 | -1.7857112707 |
| H  | -1.8337789790 | -0.5890534413 | -2.3374833455 |
| H  | -0.2024860057 | -1.3570429311 | -2.2702992977 |
| Mg | 1.7319550011  | 0.0467164969  | 0.4740236054  |
| O  | 1.9902607125  | -1.5522091060 | -0.9649242022 |
| O  | 2.8729805779  | -1.4407828138 | 1.3472289314  |
| P  | 2.8676100774  | -2.2543226006 | 0.0603651001  |
| O  | 2.3656822369  | -3.7551122857 | 0.3884293520  |
| O  | 4.3361437373  | -2.4738387989 | -0.5491625651 |
| C  | 5.4172973762  | -2.8061243181 | 0.3061223445  |
| H  | 5.2792967212  | -3.8064405223 | 0.7486484103  |
| H  | 6.3267658781  | -2.8041890179 | -0.3068872296 |
| H  | 5.5160697337  | -2.0676431469 | 1.1153527098  |
| C  | 2.3494249065  | -4.7239246833 | -0.6433884813 |
| H  | 1.8032447105  | -5.5971882747 | -0.2643815423 |
| H  | 1.8421305291  | -4.3403373147 | -1.5432989742 |
| H  | 3.3722287913  | -5.0259485922 | -0.9184380342 |
| O  | 1.1654966498  | 1.6831747599  | 1.7850266935  |
| C  | 2.0094803414  | 2.3951643846  | 1.1988281820  |
| C  | 2.3260781816  | 3.8470486960  | 1.4752370346  |
| N  | 2.7349478209  | 1.8746133493  | 0.2060463156  |
| C  | 3.4302167325  | 4.1384356098  | 0.4587590053  |

|    |               |               |               |
|----|---------------|---------------|---------------|
| H  | 2.6308951631  | 3.9603628936  | 2.5256455873  |
| H  | 1.4152785523  | 4.4486050400  | 1.3383156283  |
| C  | 3.6077070990  | 2.8186806827  | -0.3162428709 |
| Br | 0.0049105214  | 1.0515241505  | -1.9722217815 |
| H  | 3.1811034873  | 4.9379873307  | -0.2532845024 |
| H  | 4.3920587848  | 4.4079499541  | 0.9181245990  |
| O  | 4.3782327346  | 2.6475037061  | -1.2236889295 |
| H  | -7.5972127683 | 0.2357126724  | -1.6408585598 |
| N  | -1.5167814623 | -2.4763506655 | -0.2365778989 |
| C  | -1.0738242184 | -3.1705231173 | 0.9671402587  |
| H  | -1.1601151218 | -2.5388462008 | 1.8556921322  |
| H  | -1.7088891203 | -4.0557513553 | 1.1188302362  |
| H  | -0.0191103669 | -3.4911082111 | 0.8943728464  |
| C  | -1.4151491088 | -3.3313531883 | -1.4038594494 |
| H  | -0.3708417270 | -3.5520124486 | -1.6993233724 |
| H  | -1.9062699210 | -4.2863916720 | -1.1696600842 |
| H  | -1.9464299950 | -2.9090880752 | -2.2669264743 |

IN5

0 1

|    |               |               |               |
|----|---------------|---------------|---------------|
| O  | 0.2202392161  | -0.9862786520 | -0.9660013293 |
| C  | -0.8864770761 | -0.6867166568 | -0.2384493168 |
| C  | -1.8755325033 | 0.2784255371  | -0.9505406125 |
| C  | -2.0122889416 | -1.7686747322 | -0.2699387051 |
| C  | -2.7431380023 | -0.9420424638 | -1.3591964580 |
| H  | -1.4157915184 | 0.8730080927  | -1.7529607371 |
| H  | -2.4324386607 | 0.9340618375  | -0.2659636512 |
| H  | -1.6710020058 | -2.7742209152 | -0.5543338903 |
| H  | -2.5860840818 | -1.8174756309 | 0.6690755669  |
| C  | -2.4135071679 | -1.4397877816 | -2.7699146596 |
| H  | -2.8967698858 | -2.4114140020 | -2.9574503055 |
| H  | -2.7810159480 | -0.7257147703 | -3.5229525865 |
| H  | -1.3264812060 | -1.5519706298 | -2.8878523065 |
| C  | -4.2393731582 | -0.7846735441 | -1.1985468213 |
| C  | -4.8726538899 | 0.4189761521  | -1.5270349727 |
| C  | -5.0312426853 | -1.8564888825 | -0.7722065229 |
| C  | -6.2563126729 | 0.5520482240  | -1.4244231742 |
| H  | -4.2727153320 | 1.2667645904  | -1.8690435494 |
| C  | -6.4153498323 | -1.7285257926 | -0.6676483274 |
| H  | -4.5567497247 | -2.8083787153 | -0.5179402159 |
| C  | -7.0333991884 | -0.5217378321 | -0.9921281473 |
| H  | -6.7306534231 | 1.5016506332  | -1.6829477078 |
| H  | -7.0150020032 | -2.5769344968 | -0.3296246676 |
| C  | -0.3824710735 | -0.2528646870 | 1.1440217505  |
| C  | -0.5538879287 | 1.1700598485  | 1.5690990200  |
| H  | -0.6735760138 | 1.8194778148  | 0.6974949752  |
| H  | 0.2615530303  | 1.5397569705  | 2.1912379606  |
| Mg | 2.0361882813  | -0.3891016754 | -1.0009748754 |
| O  | 2.0765346972  | 1.2147607587  | 0.5857009972  |
| O  | 2.2316005550  | 1.4910763030  | -1.8790527365 |
| P  | 2.2120393732  | 2.2184220362  | -0.5478503259 |
| O  | 1.0029990010  | 3.2965156082  | -0.5533588850 |
| O  | 3.5216279085  | 3.1218714094  | -0.3105057222 |
| C  | 4.0518930714  | 3.8847988389  | -1.3827852493 |
| H  | 3.3681812385  | 4.7025665174  | -1.6645551085 |
| H  | 5.0013039000  | 4.3127241812  | -1.0379204527 |
| H  | 4.2283538839  | 3.2502489872  | -2.2638149938 |
| C  | 0.9153225611  | 4.2786268589  | 0.4606267727  |
| H  | -0.0526431657 | 4.7828639532  | 0.3454786564  |
| H  | 0.9698863107  | 3.8306634013  | 1.4665775566  |



|    |               |               |               |
|----|---------------|---------------|---------------|
| H  | 1.7229718505  | 5.0214193129  | 0.3678087016  |
| O  | 3.4811118758  | -1.5167885856 | -2.0877648452 |
| C  | 3.8676644516  | -2.0795938387 | -1.0469713137 |
| C  | 5.0064221319  | -3.0666575055 | -0.9173817614 |
| N  | 3.2551664943  | -1.8207311379 | 0.1179711658  |
| C  | 5.0391553860  | -3.3249884926 | 0.5885133531  |
| H  | 5.9244532105  | -2.6260609405 | -1.3310093759 |
| H  | 4.7784003639  | -3.9587054627 | -1.5192590905 |
| C  | 3.8393661889  | -2.5352337981 | 1.1340126688  |
| Br | -2.2010572279 | 1.2709516916  | 2.6147126546  |
| H  | 4.9349544411  | -4.3820778028 | 0.8702712704  |
| H  | 5.9524370351  | -2.9526997720 | 1.0757324500  |
| O  | 3.4685676791  | -2.5670325677 | 2.2905345232  |
| H  | -8.1174483461 | -0.4183795564 | -0.9083499577 |
| N  | 0.2618347188  | -1.0781664811 | 1.9073751611  |
| C  | 0.3579348289  | -2.5092217478 | 1.5947857431  |
| H  | 0.3571130977  | -2.6396804388 | 0.5088073909  |
| H  | 1.3037560685  | -2.8787273176 | 2.0039261302  |
| H  | -0.4936612017 | -3.0295562669 | 2.0572557857  |
| C  | 0.9666762101  | -0.6280683884 | 3.1142937477  |
| H  | 1.7056205833  | 0.1303093662  | 2.8208657129  |
| H  | 0.2514659883  | -0.2214050603 | 3.8430413855  |
| H  | 1.5087182327  | -1.4774009033 | 3.5374542575  |

TS2a

0 1

|    |                |               |               |
|----|----------------|---------------|---------------|
| O  | 0.4954553344   | -1.0559903412 | 1.6688631060  |
| C  | 0.8631483624   | -2.3348521328 | 1.4025669843  |
| C  | 2.0053744991   | -3.0033600649 | 2.2108052070  |
| C  | -0.0329783483  | -3.5074830766 | 1.8611634482  |
| C  | 1.2500334973   | -4.3519952353 | 2.1099102150  |
| H  | 1.9510201940   | -2.6123550963 | 3.2371681725  |
| H  | 3.0425764041   | -2.9210439717 | 1.8599968029  |
| H  | -0.4947197010  | -3.2095570924 | 2.8132285762  |
| H  | -0.8195603050  | -3.8946460931 | 1.1985135403  |
| C  | 1.1320579985   | -2.2217293287 | -0.0901376169 |
| C  | 0.1778743940   | -2.7025982793 | -1.0426459267 |
| H  | -0.2434389320  | -3.6823655533 | -0.7989971417 |
| H  | 0.4535015937   | -2.6002043303 | -2.0942306437 |
| Mg | -0.3759346331  | 0.5291424591  | 1.0818056673  |
| O  | 0.4474959208   | 1.5121834787  | -0.5780800212 |
| O  | 0.7202618803   | 2.1811741311  | 1.7904889088  |
| P  | 1.0376931935   | 2.5615342562  | 0.3524991555  |
| O  | 2.6330764139   | 2.7249906202  | 0.1753511708  |
| O  | 0.4649522090   | 4.0099496218  | -0.0532496118 |
| C  | 0.7118565128   | 5.1188823578  | 0.7929993774  |
| H  | 1.7864602044   | 5.3629921372  | 0.8222462244  |
| H  | 0.1597812356   | 5.9728222884  | 0.3809783698  |
| H  | 0.3641656292   | 4.9148557036  | 1.8171730598  |
| C  | 3.1524973933   | 2.9257337211  | -1.1274263487 |
| H  | 4.2436300778   | 3.0027838674  | -1.0363872025 |
| H  | 2.8986505192   | 2.0789470695  | -1.7839326872 |
| H  | 2.7596985001   | 3.8551674532  | -1.5707387493 |
| O  | -2.2978452795  | 0.9655065981  | 1.2381713840  |
| C  | -3.2922849367  | 0.7568686579  | 0.5078327255  |
| C  | -4.5985630882  | 1.5075277487  | 0.6808267535  |
| N  | -3.3473790764  | -0.1209062648 | -0.4836413727 |
| C  | -5.44796315745 | 0.9333584700  | -0.4243777495 |
| H  | -4.4023401118  | 2.5860053768  | 0.5941145238  |
| H  | -4.9764953541  | 1.3310184122  | 1.6986837031  |

|    |               |               |               |
|----|---------------|---------------|---------------|
| C  | -4.5963452390 | -0.1230047457 | -1.1014929378 |
| Br | -1.5232121760 | -1.4733390701 | -0.8473747169 |
| H  | -6.3976448778 | 0.4497217671  | -0.0619422261 |
| H  | -5.7810253751 | 1.6735754502  | -1.1793463519 |
| O  | -4.9221467335 | -0.8365740849 | -2.0113829198 |
| C  | 2.3383398349  | -1.5208323548 | -0.5237808834 |
| C  | 2.8948915115  | -1.8198179671 | -1.7842067433 |
| C  | 3.0334608421  | -0.6287883177 | 0.3212553907  |
| C  | 4.1053429418  | -1.2624221811 | -2.1782273205 |
| H  | 2.4055261379  | -2.5365232820 | -2.4439199921 |
| C  | 4.2346115374  | -0.0662162782 | -0.0828058871 |
| H  | 2.5908381780  | -0.3536848012 | 1.2786432612  |
| C  | 4.7762998770  | -0.3827267083 | -1.3295905357 |
| H  | 4.5284366924  | -1.5201749834 | -3.1508380069 |
| H  | 4.7383711891  | 0.6429615560  | 0.5755630058  |
| H  | 5.7245087712  | 0.0604341264  | -1.6425745294 |
| C  | 1.2721343357  | -5.2355216195 | 3.3535888574  |
| H  | 0.5723127573  | -6.0798272336 | 3.2579739435  |
| H  | 2.2783414573  | -5.6514686825 | 3.5171381656  |
| H  | 0.9884509438  | -4.6566990726 | 4.2457690089  |
| C  | 1.6024076325  | -5.1639527274 | 0.8659133266  |
| C  | 2.8070828485  | -5.0194946211 | 0.1713522208  |
| C  | 0.6702743935  | -6.0902874030 | 0.3732933597  |
| C  | 3.0636718837  | -5.7538053339 | -0.9888983649 |
| H  | 3.5637611752  | -4.3175505342 | 0.5242697075  |
| C  | 0.9211902631  | -6.8265126551 | -0.7801237793 |
| H  | -0.2795820470 | -6.2265408317 | 0.8976835470  |
| C  | 2.1210788940  | -6.6551178582 | -1.4733819309 |
| H  | 4.0106310780  | -5.6137930442 | -1.5153598344 |
| H  | 0.1741809750  | -7.5350745736 | -1.1448731705 |
| H  | 2.3182718807  | -7.2258603229 | -2.3832762281 |

TS2b

0 1

|    |               |               |               |
|----|---------------|---------------|---------------|
| O  | -0.1706470726 | -0.8195503489 | 1.6358279802  |
| C  | -1.2934151926 | -0.6299161314 | 0.9782612371  |
| C  | -2.5287945645 | -1.8195930281 | 1.1001577140  |
| C  | -2.3252677616 | 0.3217953304  | 1.6133013188  |
| C  | -3.4647204362 | -0.7312971705 | 1.6591153418  |
| H  | -2.0984956870 | -2.4954753351 | 1.8504377610  |
| H  | -2.8653299796 | -2.4020557483 | 0.2329087858  |
| H  | -1.9574324012 | 0.5850589628  | 2.6115460969  |
| H  | -2.5110489536 | 1.2518105125  | 1.0602661859  |
| C  | -1.2893710471 | -0.8174479381 | -0.4662537547 |
| C  | -2.0787964419 | 0.0861335688  | -1.3224536745 |
| H  | -3.0060153383 | 0.4553478617  | -0.8779896954 |
| H  | -2.2559344960 | -0.2632465968 | -2.3430835065 |
| Mg | 1.5149298052  | 0.0465615997  | 1.2372130781  |
| O  | 2.6400061419  | -0.6445109538 | -0.4034806663 |
| O  | 3.1364018404  | -1.0135934981 | 1.9931582631  |
| P  | 3.6434064569  | -1.2360572663 | 0.5739242318  |
| O  | 3.9050009497  | -2.8098432586 | 0.3378210767  |
| O  | 5.0878572418  | -0.5728762528 | 0.3214651283  |
| C  | 6.1265533847  | -0.7842352613 | 1.2615567349  |
| H  | 6.4274451924  | -1.8446373430 | 1.2895897335  |
| H  | 6.9823806884  | -0.1757969118 | 0.9437380452  |
| H  | 5.8100963824  | -0.4779227764 | 2.2701034654  |
| C  | 4.4081044406  | -3.2323366482 | -0.9165000769 |
| H  | 4.3182509452  | -4.3259040935 | -0.9547344999 |
| H  | 3.8290153589  | -2.7894919027 | -1.7420730536 |

|    |               |               |               |
|----|---------------|---------------|---------------|
| H  | 5.4676732719  | -2.9531125096 | -1.0322664668 |
| O  | 1.6607137306  | 1.9685792036  | 1.3222760284  |
| C  | 1.7431274182  | 3.0233752508  | 0.6304617348  |
| C  | 2.6248098569  | 4.1763417961  | 1.0858252770  |
| N  | 1.1102026808  | 3.2567067599  | -0.4982719842 |
| C  | 2.4381054697  | 5.1993937471  | -0.0259693362 |
| H  | 3.6562606091  | 3.8134367815  | 1.2063148915  |
| H  | 2.2872799550  | 4.5160705366  | 2.0766040364  |
| C  | 1.4265117205  | 4.5261384825  | -0.9690270224 |
| Br | -0.7409634926 | 1.5690279267  | -1.2612694939 |
| H  | 2.0311718791  | 6.1641979301  | 0.3087336822  |
| H  | 3.3571111981  | 5.4151896234  | -0.5900918637 |
| O  | 0.9756621777  | 5.0297133828  | -1.9668895922 |
| C  | -3.9342272443 | -1.0441523405 | 3.0843185783  |
| H  | -4.4685560233 | -0.1798585863 | 3.5070692920  |
| H  | -4.6206710635 | -1.9046512690 | 3.0903620875  |
| H  | -3.0770472352 | -1.2736842748 | 3.7353746004  |
| C  | -4.6775628443 | -0.4200624311 | 0.7930952135  |
| C  | -5.3647417729 | -1.4307837184 | 0.1119878864  |
| C  | -5.1775791637 | 0.8858370869  | 0.7168676545  |
| C  | -6.5009715525 | -1.1437773305 | -0.6434406115 |
| H  | -5.0160762625 | -2.4648571156 | 0.1715906378  |
| C  | -6.3124103723 | 1.1775017934  | -0.0375308027 |
| H  | -4.6727504438 | 1.6931921551  | 1.2531979750  |
| C  | -6.9760077044 | 0.1634318586  | -0.7263320622 |
| H  | -7.0175533823 | -1.9489219262 | -1.1705623255 |
| H  | -6.6786147909 | 2.2051274840  | -0.0878409437 |
| H  | -7.8620580230 | 0.3910840490  | -1.3223723880 |
| C  | -0.4020779157 | -1.8129378864 | -1.0828703403 |
| C  | -0.0947213701 | -1.7410099968 | -2.4544801018 |
| C  | 0.1530392872  | -2.8658405527 | -0.3274421608 |
| C  | 0.7216550045  | -2.6925076445 | -3.0509257143 |
| H  | -0.4536840061 | -0.9091531401 | -3.0605379115 |
| C  | 0.9460605026  | -3.8290237865 | -0.9335450407 |
| H  | -0.0292014523 | -2.9179315655 | 0.7440245113  |
| C  | 1.2303613860  | -3.7476813435 | -2.2960290573 |
| H  | 0.9634833156  | -2.6063278182 | -4.1115400382 |
| H  | 1.3632686573  | -4.6362329414 | -0.3297317126 |
| H  | 1.8635045384  | -4.5016590427 | -2.7691303674 |

TS2c

0 1

|   |               |               |               |
|---|---------------|---------------|---------------|
| O | 0.7089150540  | 0.5244115239  | -2.3122787702 |
| C | -0.5044228991 | 0.3197755535  | -1.7764546949 |
| C | -1.1940474632 | 1.5219117644  | -1.0671216425 |
| C | -1.7427150990 | 0.3456109152  | -2.8114410145 |
| C | -2.4642465205 | 1.4058328663  | -1.9461496195 |
| H | -0.6191464043 | 2.4273541198  | -1.2963867696 |
| H | -1.3198869682 | 1.4631596815  | 0.0169348152  |
| H | -1.3131704044 | 0.7422828665  | -3.7409050615 |
| H | -2.2821050825 | -0.5876768286 | -3.0307343947 |
| C | -2.8158093730 | 2.6904226991  | -2.7008571614 |
| H | -3.6157907081 | 2.5107148346  | -3.4358838724 |
| H | -3.1677044966 | 3.4629698266  | -1.9998249958 |
| H | -1.9349413374 | 3.0822721571  | -3.2316481466 |
| C | -3.7108801767 | 0.8888503317  | -1.2401562051 |
| C | -3.9899120191 | 1.2150644413  | 0.0903354636  |
| C | -4.6543942268 | 0.1273475422  | -1.9408689606 |
| C | -5.1577044336 | 0.7731428162  | 0.7096671328  |
| H | -3.2795593443 | 1.8162602441  | 0.6616500185  |

|    |               |               |               |
|----|---------------|---------------|---------------|
| C  | -5.8247069229 | -0.3152636216 | -1.3283806802 |
| H  | -4.4744431531 | -0.1250108269 | -2.9894158139 |
| C  | -6.0789828399 | 0.0015944071  | 0.0049988625  |
| H  | -5.3451819217 | 1.0314272109  | 1.7543683875  |
| H  | -6.5429068197 | -0.9103138721 | -1.8973107916 |
| C  | -0.6989772755 | -1.0504413665 | -1.1928297928 |
| C  | -0.0646070113 | -2.1369654234 | -1.8581944899 |
| H  | 0.2880869350  | -1.9305579727 | -2.8723100761 |
| H  | -0.4695705293 | -3.1366377841 | -1.6730899749 |
| C  | -1.5558486488 | -1.3133897144 | -0.0313590765 |
| C  | -1.2462220264 | -0.7252497519 | 1.2060355892  |
| C  | -2.6620203008 | -2.1667832792 | -0.1458501294 |
| C  | -2.0447160899 | -0.9988698050 | 2.3110072629  |
| H  | -0.3574133854 | -0.0916243795 | 1.2940298946  |
| C  | -3.4830476849 | -2.3913039764 | 0.9537345007  |
| H  | -2.9037002851 | -2.6189992130 | -1.1102977233 |
| C  | -3.1699541545 | -1.8139016263 | 2.1833637450  |
| H  | -1.7873749624 | -0.5678933757 | 3.2806632245  |
| H  | -4.3676765085 | -3.0218583704 | 0.8508978891  |
| Mg | 2.1823787090  | 0.9312845076  | -1.1486169413 |
| O  | 1.3869014743  | 1.1609074183  | 0.8273864491  |
| O  | 2.3086888778  | 2.9525705806  | -0.6175778469 |
| P  | 1.7183030084  | 2.6458444963  | 0.7492866618  |
| O  | 0.4306664982  | 3.5851500486  | 0.9931789686  |
| O  | 2.7034659956  | 3.0261402756  | 1.9617462855  |
| C  | 3.3253772075  | 4.3002144275  | 1.9841506027  |
| H  | 2.5797519375  | 5.1019648743  | 2.1102274053  |
| H  | 4.0140077450  | 4.3105950801  | 2.8380207905  |
| H  | 3.8870691342  | 4.4770048583  | 1.0545147138  |
| C  | -0.3786146664 | 3.3870154423  | 2.1356982359  |
| H  | -1.1515543832 | 4.1657944975  | 2.1279801000  |
| H  | -0.8618756976 | 2.3963393723  | 2.1120749409  |
| H  | 0.2116748903  | 3.4699982133  | 3.0625741544  |
| O  | 4.0268167392  | 0.2506155745  | -0.9534787081 |
| C  | 4.5287319326  | -0.7071364982 | -0.3192193945 |
| C  | 5.9875830133  | -0.7255706975 | 0.0946677172  |
| N  | 3.8826621939  | -1.7987745629 | 0.0637497361  |
| C  | 6.1177448467  | -2.0450657403 | 0.8485522182  |
| H  | 6.1975567357  | 0.1692136563  | 0.6982305781  |
| H  | 6.6126737177  | -0.6576709253 | -0.8080903466 |
| C  | 4.7253611866  | -2.6807816105 | 0.7383244363  |
| Br | 1.7198010953  | -2.0413443500 | -0.7461013835 |
| H  | 6.8597843294  | -2.7359520921 | 0.4245019009  |
| H  | 6.3623400561  | -1.9220904139 | 1.9134747884  |
| O  | 4.4084308819  | -3.7598675273 | 1.1608210467  |
| H  | -6.9927089034 | -0.3475078841 | 0.4908053731  |
| H  | -3.8068778276 | -2.0038368856 | 3.0500216295  |

TS2d

0 1

|    |               |               |               |
|----|---------------|---------------|---------------|
| C  | 0.9003732528  | -1.0497363942 | 0.4645477108  |
| C  | 1.9118560997  | -1.8536625131 | 1.3516646645  |
| C  | 2.5930918332  | -0.5793272376 | 1.9111075220  |
| H  | 2.5584135290  | -2.5849801315 | 0.8566190064  |
| H  | 1.2983786243  | -2.3723510412 | 2.0972656588  |
| C  | 1.1929505957  | -0.8526312436 | -0.9815405085 |
| C  | 0.0777469223  | -0.6750229182 | -1.8691189010 |
| H  | -0.7863329698 | -1.3090973496 | -1.6236823476 |
| H  | 0.3269486124  | -0.6323073373 | -2.9328316569 |
| Mg | -2.0884183874 | -0.4233791159 | 0.7850393857  |

|      |               |               |               |
|------|---------------|---------------|---------------|
| O    | -3.5716712987 | -1.6629406555 | 1.5591935261  |
| O    | -3.2094786968 | -1.1590324256 | -0.8391525905 |
| P    | -4.0615208910 | -1.9483847225 | 0.1466285001  |
| O    | -3.9972443239 | -3.5102332124 | -0.2365487075 |
| O    | -5.6264827543 | -1.5896678866 | 0.0472794350  |
| C    | -6.2682388438 | -1.6110988265 | -1.2153054523 |
| H    | -6.2708014306 | -2.6278179086 | -1.6410869812 |
| H    | -7.3035118335 | -1.2825952648 | -1.0602530469 |
| H    | -5.7681350088 | -0.9300781563 | -1.9208914509 |
| C    | -4.5535801895 | -4.4664716135 | 0.6483125226  |
| H    | -4.3363311504 | -5.4591166198 | 0.2344159106  |
| H    | -4.1063356637 | -4.3793365401 | 1.6502263556  |
| H    | -5.6453773875 | -4.3401131864 | 0.7321968280  |
| O    | -2.4326606756 | 1.4297612080  | 1.3924376885  |
| C    | -2.3939491314 | 2.5937368722  | 0.9266624865  |
| C    | -3.0376381216 | 3.7656099781  | 1.6460746927  |
| N    | -1.8075946395 | 2.9554204904  | -0.2047843078 |
| C    | -2.7507412344 | 4.9409505328  | 0.7181016990  |
| H    | -2.5897904404 | 3.8585199134  | 2.6465890581  |
| H    | -4.1056592078 | 3.5491267723  | 1.7938932402  |
| C    | -1.9318019374 | 4.3242545637  | -0.4251916793 |
| Br   | -0.6820495891 | 1.1768446710  | -1.2965653681 |
| H    | -3.6546026220 | 5.4008423720  | 0.2932309103  |
| H    | -2.1658605900 | 5.7484127873  | 1.1807746427  |
| O    | -1.4688274172 | 4.9246628264  | -1.3586070295 |
| O    | -0.3738140577 | -1.2450027923 | 0.7697310010  |
| C    | 1.5798768323  | 0.2880595707  | 1.1357109097  |
| H    | 0.7903624134  | 0.7255103551  | 1.7586402165  |
| H    | 1.9714987996  | 1.0542331610  | 0.4582971233  |
| C    | 2.4640802661  | -0.4290684194 | 3.4294037653  |
| H    | 3.0740040075  | -1.1836477758 | 3.9496979027  |
| H    | 2.8095242264  | 0.5655277757  | 3.7512880589  |
| H    | 1.4168047813  | -0.5540639682 | 3.7437434695  |
| C    | 4.0544867438  | -0.4228196448 | 1.5151910838  |
| C    | 4.9354427755  | -1.4946975470 | 1.7112261333  |
| C    | 4.5750709769  | 0.7725398495  | 1.0135367479  |
| C    | 6.2859916748  | -1.3859009393 | 1.3925295395  |
| H    | 4.5562023459  | -2.4364868997 | 2.1180983718  |
| C    | 5.9270377884  | 0.8863883303  | 0.6895407965  |
| H    | 3.9219364202  | 1.6341263840  | 0.8613573468  |
| C    | 6.7875963849  | -0.1928246293 | 0.8723516059  |
| H    | 6.9514753681  | -2.2376138212 | 1.5513980415  |
| H    | 6.3070328561  | 1.8286341582  | 0.2884420674  |
| H    | 7.8456474294  | -0.1042406723 | 0.6166114578  |
| C    | 2.5445752910  | -0.6442273414 | -1.5318822941 |
| C    | 3.5535270148  | -1.6108237263 | -1.4183277360 |
| C    | 2.8206453511  | 0.5491315792  | -2.2249697971 |
| C    | 4.8109385994  | -1.3838118526 | -1.9689272621 |
| H    | 3.3521934296  | -2.5610789715 | -0.9269363952 |
| C    | 4.0889141726  | 0.7839266680  | -2.7412821935 |
| H    | 2.0438260118  | 1.3105991667  | -2.3229008087 |
| C    | 5.0874171746  | -0.1817419129 | -2.6140722409 |
| H    | 5.5838797311  | -2.1481573114 | -1.8747802700 |
| H    | 4.2968010351  | 1.7276000791  | -3.2490949727 |
| H    | 6.0832571228  | 0.0031294617  | -3.0216100848 |
| TS3a |               |               |               |
| 01   |               |               |               |
| O    | 0.4144706507  | -0.1747326069 | 1.8827967482  |
| C    | 1.6660818539  | -0.0599354598 | 1.3790579178  |

|    |               |               |               |
|----|---------------|---------------|---------------|
| C  | 2.6789883177  | 0.8835893258  | 2.1205977157  |
| C  | 2.6589568844  | -1.2094197666 | 1.6985549656  |
| C  | 3.7920025658  | -0.1789187709 | 1.9658619775  |
| H  | 2.3394478434  | 0.9427033168  | 3.1647868242  |
| H  | 2.8465909552  | 1.9026700606  | 1.7466314721  |
| H  | 2.3136564510  | -1.6583332942 | 2.6395814981  |
| H  | 2.8239303206  | -2.0185630603 | 0.9729251968  |
| C  | 4.6488245431  | -0.4211434448 | 3.2076553889  |
| H  | 5.2919555738  | -1.3059909474 | 3.0834432922  |
| H  | 5.3024918348  | 0.4429097549  | 3.4044970398  |
| H  | 4.0133363091  | -0.5826302303 | 4.0917421601  |
| C  | 4.6883697798  | 0.0081284841  | 0.7463060164  |
| C  | 4.8843101048  | 1.2416821926  | 0.1193016461  |
| C  | 5.3577081422  | -1.1071796125 | 0.2198539054  |
| C  | 5.7030807939  | 1.3565745595  | -1.0063110580 |
| H  | 4.3906583495  | 2.1358919057  | 0.5026726404  |
| C  | 6.1748432449  | -0.9991275199 | -0.9010415198 |
| H  | 5.2243935573  | -2.0845524136 | 0.6919856977  |
| C  | 6.3473228063  | 0.2376192680  | -1.5250294562 |
| H  | 5.8340134403  | 2.3324264019  | -1.4796850028 |
| H  | 6.6777264152  | -1.8858686741 | -1.2935670008 |
| C  | 1.5442826791  | 0.3401058946  | -0.0997268656 |
| C  | 2.0015321299  | -0.5408775627 | -1.1201970606 |
| H  | 2.8390474072  | -1.1893901270 | -0.8617745602 |
| H  | 2.0545890248  | -0.1729438017 | -2.1457637998 |
| C  | 0.8291943313  | 1.5584619649  | -0.4141606341 |
| C  | 0.3231185146  | 2.4070410387  | 0.6074194750  |
| C  | 0.6092551210  | 1.9606911737  | -1.7475601289 |
| C  | -0.3179204514 | 3.5862010518  | 0.3087363403  |
| H  | 0.4075871441  | 2.0992686862  | 1.6481680323  |
| C  | -0.0465717272 | 3.1383961032  | -2.0630403853 |
| H  | 0.9471669657  | 1.3368197016  | -2.5741359554 |
| C  | -0.5092069586 | 3.9692121603  | -1.0305105955 |
| H  | -0.7181938241 | 4.2243622973  | 1.0965688712  |
| H  | -0.1969462348 | 3.3992330216  | -3.1097864144 |
| Mg | -1.3231503623 | -0.6649390465 | 1.3288125119  |
| O  | -2.3449596391 | 0.4193188288  | -0.1756479703 |
| O  | -2.8339632790 | 0.4561507093  | 2.2546951563  |
| P  | -3.2887997510 | 0.9520282365  | 0.8911156063  |
| O  | -3.3764706213 | 2.5631441327  | 0.9026104316  |
| O  | -4.7942534787 | 0.4989867185  | 0.5358527339  |
| C  | -5.8187088965 | 0.6918653086  | 1.4944522742  |
| H  | -5.9897206299 | 1.7647814471  | 1.6826043357  |
| H  | -6.7357736517 | 0.2480069794  | 1.0868847753  |
| H  | -5.5626211311 | 0.2010910447  | 2.4457809569  |
| C  | -3.7144791458 | 3.2303409140  | -0.2991718814 |
| H  | -3.4633074102 | 4.2905197784  | -0.1700216098 |
| H  | -3.1384714959 | 2.8239098780  | -1.1466255665 |
| H  | -4.7899463766 | 3.1291825537  | -0.5178945991 |
| O  | -2.0498694332 | -2.5017252443 | 1.1388950033  |
| C  | -2.1660026565 | -3.3061773479 | 0.1907579340  |
| C  | -3.2282675321 | -4.3889433382 | 0.1684353443  |
| N  | -1.4051209814 | -3.3354127026 | -0.8968272962 |
| C  | -2.9888658333 | -5.0886762903 | -1.1657996267 |
| H  | -4.2156954201 | -3.9143567926 | 0.2629725191  |
| H  | -3.0958710695 | -5.0345533991 | 1.0490653585  |
| C  | -1.7848149071 | -4.3531411838 | -1.7677243999 |
| Br | 0.3371904815  | -1.8764833371 | -1.0614560669 |
| H  | -2.7436040783 | -6.1563319002 | -1.0757966191 |
| H  | -3.8332857240 | -5.0089869757 | -1.8652725235 |

|   |               |               |               |
|---|---------------|---------------|---------------|
| O | -1.2528725261 | -4.6084346329 | -2.8146906930 |
| O | -1.1504993432 | 5.1244535817  | -1.2278635966 |
| C | -1.4406970844 | 5.5471701730  | -2.5387504897 |
| H | -2.0812872911 | 4.8184855887  | -3.0629606035 |
| H | -1.9782617903 | 6.4977076264  | -2.4463903227 |
| H | -0.5207777393 | 5.7101598077  | -3.1238643684 |
| H | 6.9832969380  | 0.3257148128  | -2.4084130924 |

TS3b

0 1

|    |               |               |               |
|----|---------------|---------------|---------------|
| O  | -0.4515803986 | -0.5738030990 | 1.8910380125  |
| C  | -1.5572580918 | -0.5552752112 | 1.1728129996  |
| C  | -2.6201170956 | -1.8861916145 | 1.3435976283  |
| C  | -2.7241583650 | 0.2976387370  | 1.7072561096  |
| C  | -3.6941507077 | -0.9046241547 | 1.8573782140  |
| H  | -2.1172522586 | -2.4834916480 | 2.1145577246  |
| H  | -2.8791953376 | -2.5265137588 | 0.4900613893  |
| H  | -2.4181087731 | 0.7218067453  | 2.6700555232  |
| H  | -3.0369272513 | 1.1213687614  | 1.0531548446  |
| C  | -1.4661577301 | -0.8201478657 | -0.2582157970 |
| C  | -2.4136869235 | -0.1678153891 | -1.1968844432 |
| H  | -3.4112645200 | -0.0036628697 | -0.7794505898 |
| H  | -2.4968014759 | -0.6624196891 | -2.1694223471 |
| Mg | 1.1059167425  | 0.5026059945  | 1.5295882083  |
| O  | 2.5704917678  | -0.1597750398 | 0.1369163654  |
| O  | 2.8381321379  | 0.1119223482  | 2.5841052983  |
| P  | 3.5608825334  | -0.2359006038 | 1.2872789303  |
| O  | 4.2605609186  | -1.6742568818 | 1.4515977654  |
| O  | 4.7911917618  | 0.7602583749  | 0.9817905454  |
| C  | 5.7159751552  | 1.0678737221  | 2.0116977017  |
| H  | 6.2948122779  | 0.1761120932  | 2.3023595982  |
| H  | 6.3998533067  | 1.8294989929  | 1.6172380596  |
| H  | 5.1963926752  | 1.4611803225  | 2.8983024081  |
| C  | 4.9993691448  | -2.2375150818 | 0.3819191023  |
| H  | 5.5526540894  | -3.0951075906 | 0.7855067763  |
| H  | 4.3318221969  | -2.5852409331 | -0.4204220983 |
| H  | 5.7153870224  | -1.5097823066 | -0.0328020595 |
| O  | 0.7465083992  | 2.3147956785  | 1.0248110021  |
| C  | 1.0932403512  | 3.1528838815  | 0.1373029899  |
| C  | 2.4784070167  | 3.7833342001  | 0.1629112591  |
| N  | 0.3390843479  | 3.5448716476  | -0.8620362760 |
| C  | 2.4425580429  | 4.6997670918  | -1.0510967070 |
| H  | 3.2320796598  | 2.9817486083  | 0.1065676406  |
| H  | 2.6265406082  | 4.2995745093  | 1.1234391474  |
| C  | 1.0459930976  | 4.4462386506  | -1.6503760543 |
| Br | -1.5130081115 | 1.5786165501  | -1.3685723627 |
| H  | 2.5370471349  | 5.7684383434  | -0.8088650981 |
| H  | 3.2039458888  | 4.4718069298  | -1.8106711405 |
| O  | 0.6374947867  | 4.9566169411  | -2.6638853038 |
| C  | -4.0709324542 | -1.1807208413 | 3.3171014942  |
| H  | -4.7161328913 | -0.3758238682 | 3.7006227260  |
| H  | -4.6198635056 | -2.1306145574 | 3.4079186379  |
| H  | -3.1698224075 | -1.2327586242 | 3.9467979601  |
| C  | -4.9601831889 | -0.8408387469 | 1.0158646972  |
| C  | -5.5266336420 | -2.0011777014 | 0.4756143906  |
| C  | -5.6283476864 | 0.3739026012  | 0.8215970001  |
| C  | -6.7116591264 | -1.9482322081 | -0.2563238011 |
| H  | -5.0406823057 | -2.9681535315 | 0.6305463534  |
| C  | -6.8132589195 | 0.4315110389  | 0.0895977577  |
| H  | -5.2183282026 | 1.2938833635  | 1.2452764594  |

|   |               |               |               |
|---|---------------|---------------|---------------|
| C | -7.3571884864 | -0.7294033885 | -0.4569780669 |
| H | -7.1326716603 | -2.8662643147 | -0.6722274612 |
| H | -7.3125288920 | 1.3919326086  | -0.0551366573 |
| H | -8.2825212623 | -0.6847601327 | -1.0349137331 |
| C | -0.3789726027 | -1.6292134520 | -0.7786819851 |
| C | 0.0227090480  | -1.4993289933 | -2.1227486757 |
| C | 0.3521773966  | -2.5266649082 | 0.0401256964  |
| C | 1.1237176636  | -2.1750853623 | -2.6217172838 |
| H | -0.4849262269 | -0.7978413626 | -2.7852562591 |
| C | 1.4192874460  | -3.2367128603 | -0.4590373546 |
| H | 0.0765021578  | -2.6506566268 | 1.0851287136  |
| C | 1.8385726102  | -3.0441242064 | -1.7863638636 |
| H | 1.4290741243  | -2.0000134841 | -3.6521955841 |
| H | 1.9815130267  | -3.9245757411 | 0.1732457467  |
| O | 2.9311263227  | -3.7177462769 | -2.1623239269 |
| C | 3.4441488974  | -3.5448888885 | -3.4628518837 |
| H | 4.337277553   | -4.1758630397 | -3.5294369669 |
| H | 2.7188305322  | -3.8681110154 | -4.2273912393 |
| H | 3.7263614557  | -2.4952948667 | -3.6463848579 |

TS3c

0 1

|    |               |               |               |
|----|---------------|---------------|---------------|
| O  | -0.7232621025 | 0.5335623343  | 2.2923468531  |
| C  | 0.4931036775  | 0.3172438240  | 1.7644149868  |
| C  | 1.1942921686  | 1.5173667060  | 1.0582824919  |
| C  | 1.7219793463  | 0.3371902117  | 2.8028019025  |
| C  | 2.4637311694  | 1.3819953936  | 1.9354035416  |
| H  | 0.6285851809  | 2.4257014804  | 1.2995277141  |
| H  | 1.3197524596  | 1.4743555169  | -0.0262071511 |
| H  | 1.3007704529  | 0.7493801908  | 3.7294234712  |
| H  | 2.2464162507  | -0.6027576423 | 3.0304781671  |
| C  | 2.8393702367  | 2.6623653182  | 2.6866415894  |
| H  | 3.6368474161  | 2.4703212509  | 3.4213970521  |
| H  | 3.2038564087  | 3.4278281578  | 1.9841514167  |
| H  | 1.9660251114  | 3.0701951415  | 3.2177517723  |
| C  | 3.7047796164  | 0.8502384117  | 1.2283626619  |
| C  | 4.0013141224  | 1.1994395051  | -0.0928031999 |
| C  | 4.6346392131  | 0.0646980716  | 1.9218102954  |
| C  | 5.1746889796  | 0.7654706111  | -0.7084944992 |
| H  | 3.3010068280  | 1.8165337510  | -0.6594784047 |
| C  | 5.8105551687  | -0.3699578283 | 1.3143888268  |
| H  | 4.4409400095  | -0.2087358801 | 2.9624531572  |
| C  | 6.0850375856  | -0.0226594283 | -0.0077760704 |
| H  | 5.3728549125  | 1.0416222647  | -1.7467448667 |
| H  | 6.5191194759  | -0.9797488252 | 1.8798736376  |
| C  | 0.6734302543  | -1.0586312833 | 1.1717713699  |
| C  | 0.0478683100  | -2.1406433000 | 1.8547929732  |
| H  | -0.2811738203 | -1.9333641306 | 2.8766643649  |
| H  | 0.4434581652  | -3.1431814170 | 1.6638486694  |
| C  | 1.5188948261  | -1.3122278856 | 0.0145819068  |
| C  | 1.2796697171  | -0.6542248803 | -1.2102789297 |
| C  | 2.6015343722  | -2.1945551745 | 0.1128676446  |
| C  | 2.1259934637  | -0.8583652624 | -2.2806880874 |
| H  | 0.3956277809  | -0.0159531510 | -1.3106888980 |
| C  | 3.4904185718  | -2.3568967707 | -0.9422353134 |
| H  | 2.7951247991  | -2.7143505830 | 1.0539036642  |
| C  | 3.2639452879  | -1.6729835733 | -2.1432758306 |
| H  | 1.9467854129  | -0.3775631304 | -3.2434910776 |
| H  | 4.3613446191  | -2.9970044177 | -0.8106041530 |
| Mg | -2.1899142927 | 0.9321240207  | 1.1225215593  |



|    |               |               |               |
|----|---------------|---------------|---------------|
| O  | -1.3874460117 | 1.1587196205  | -0.8530150642 |
| O  | -2.3152492886 | 2.9541036627  | 0.5845266966  |
| P  | -1.7166304423 | 2.6441754804  | -0.7775437757 |
| O  | -0.4258871724 | 3.5814499657  | -1.0154693840 |
| O  | -2.6931371315 | 3.0253652528  | -1.9972370864 |
| C  | -3.3134989796 | 4.2998444252  | -2.0233490669 |
| H  | -2.5663003792 | 5.1010510567  | -2.1439011859 |
| H  | -3.9962912836 | 4.3115160842  | -2.8819386442 |
| H  | -3.8813070206 | 4.4768620259  | -1.0974561720 |
| C  | 0.3860172307  | 3.3856781759  | -2.1563784655 |
| H  | 1.1418605373  | 4.1811272686  | -2.1605086778 |
| H  | 0.8917082772  | 2.4066496535  | -2.1201028314 |
| H  | -0.2066355402 | 3.4429097231  | -3.0836864197 |
| O  | -4.0395786581 | 0.2610200879  | 0.9296073776  |
| C  | -4.5471448844 | -0.7151304596 | 0.3299857465  |
| C  | -6.0079801051 | -0.7432433178 | -0.0761724215 |
| N  | -3.9059206588 | -1.8213845208 | -0.0192450842 |
| C  | -6.1453170197 | -2.0863470617 | -0.7857394094 |
| H  | -6.2190003325 | 0.1319686205  | -0.7074111722 |
| H  | -6.6281755862 | -0.6444639985 | 0.8271225367  |
| C  | -4.7546623633 | -2.7227755201 | -0.6597523935 |
| Br | -1.7593867280 | -2.0513329129 | 0.7738064595  |
| H  | -6.8881492095 | -2.7603885525 | -0.3366914461 |
| H  | -6.3932614764 | -1.9974705366 | -1.8532861428 |
| O  | -4.4432803126 | -3.8168704386 | -1.0464266915 |
| H  | 7.0086573776  | -0.3577734065 | -0.4858460933 |
| O  | 4.0774801698  | -1.7320960487 | -3.2068739582 |
| C  | 5.2539244238  | -2.4971134720 | -3.1321962633 |
| H  | 5.9116377264  | -2.1436965293 | -2.3202616431 |
| H  | 5.0336704424  | -3.5673334815 | -2.9806122648 |
| H  | 5.7683002439  | -2.3727434445 | -4.0922492679 |

TS3d

0 1

|    |               |               |               |
|----|---------------|---------------|---------------|
| C  | 0.5605027946  | -1.0457066069 | 0.6668857392  |
| C  | 1.4974962128  | -1.7968894951 | 1.6765520045  |
| C  | 2.0732042133  | -0.4761779602 | 2.2530615620  |
| H  | 2.2123267401  | -2.5291900044 | 1.2871439288  |
| H  | 0.8256358568  | -2.3065615049 | 2.3770318205  |
| C  | 0.9794374547  | -0.9327470554 | -0.7758249492 |
| C  | -0.0552118171 | -0.8740835793 | -1.7541122655 |
| H  | -0.9285910886 | -1.4958123540 | -1.5178062863 |
| H  | 0.2645469313  | -0.8888071693 | -2.7992915224 |
| Mg | -2.4466711407 | -0.4823762346 | 0.7313826906  |
| O  | -3.9860886660 | -1.6225763456 | 1.5550014757  |
| O  | -3.5701712267 | -1.2634328733 | -0.8608202254 |
| P  | -4.4699825556 | -1.9596346044 | 0.1518363038  |
| O  | -4.4756341819 | -3.5411377617 | -0.1471871256 |
| O  | -6.0157167940 | -1.5349925298 | 0.0095280777  |
| C  | -6.6417628293 | -1.6011044740 | -1.2591165689 |
| H  | -6.6818913463 | -2.6392207135 | -1.6275736983 |
| H  | -7.6642549874 | -1.2218076924 | -1.1384617091 |
| H  | -6.1044943193 | -0.9826992631 | -1.9945082148 |
| C  | -5.0814693754 | -4.4219298252 | 0.7820328457  |
| H  | -4.9046916680 | -5.4444028291 | 0.4253736672  |
| H  | -4.6397161835 | -4.2994825743 | 1.7826970504  |
| H  | -6.1673763399 | -4.2436377114 | 0.8466867985  |
| O  | -2.8493450657 | 1.4229207985  | 1.1575578355  |
| C  | -2.8046856430 | 2.5302535366  | 0.5782407261  |
| C  | -3.5247082053 | 3.7541808101  | 1.1133206645  |

|    |               |               |               |
|----|---------------|---------------|---------------|
| N  | -2.1425210083 | 2.7932012864  | -0.5424498924 |
| C  | -3.1951249565 | 4.8320728914  | 0.0853715694  |
| H  | -3.1552226709 | 3.9679354911  | 2.1271424226  |
| H  | -4.5957402276 | 3.5230410332  | 1.2062509813  |
| C  | -2.2779649987 | 4.1262104536  | -0.9223890721 |
| Br | -0.9254686911 | 1.0202757652  | -1.3555148310 |
| H  | -4.0749085391 | 5.2151103631  | -0.4514280256 |
| H  | -2.6662052349 | 5.7021405875  | 0.4991574729  |
| O  | -1.7582441264 | 4.6344032665  | -1.8792662506 |
| O  | -0.7365128966 | -1.2884363115 | 0.8478420878  |
| C  | 1.1085656340  | 0.3185807278  | 1.3451527925  |
| H  | 0.2619214104  | 0.7668378482  | 1.8801572815  |
| H  | 1.5441065698  | 1.0688915037  | 0.6757384484  |
| C  | 1.7858617122  | -0.2814306948 | 3.7446504538  |
| H  | 2.3662299267  | -0.9921047185 | 4.3533463643  |
| H  | 2.0577728192  | 0.7371620079  | 4.0624091752  |
| H  | 0.7172893405  | -0.4388676690 | 3.9555985201  |
| C  | 3.5605177290  | -0.2680157131 | 2.0040767217  |
| C  | 4.4612514789  | -1.2825848777 | 2.3561449714  |
| C  | 4.0816511033  | 0.9227112815  | 1.4904684512  |
| C  | 5.8334750330  | -1.1210189065 | 2.1873247286  |
| H  | 4.0795332387  | -2.2199889382 | 2.7708120000  |
| C  | 5.4552244414  | 1.0892014167  | 1.3131807515  |
| H  | 3.4120931386  | 1.7388091709  | 1.2127872584  |
| C  | 6.3373531738  | 0.0689870635  | 1.6610875742  |
| H  | 6.5141294726  | -1.9265956637 | 2.4728707193  |
| H  | 5.8358567637  | 2.0255413790  | 0.8991594566  |
| H  | 7.4142329714  | 0.2043094052  | 1.5350376341  |
| C  | 2.3579266994  | -0.6735804534 | -1.2026868470 |
| C  | 3.4285329771  | -1.5119594892 | -0.8660645085 |
| C  | 2.6346682365  | 0.4597419098  | -1.9997612189 |
| C  | 4.7261002462  | -1.2375543313 | -1.2796576549 |
| H  | 3.2541705394  | -2.4244023064 | -0.3004984028 |
| C  | 3.9281265913  | 0.7702946099  | -2.3695984366 |
| H  | 1.8234628007  | 1.1340416778  | -2.2820861087 |
| C  | 4.9925679713  | -0.0707938331 | -2.0035150404 |
| H  | 5.5233675103  | -1.9225695969 | -0.9954906605 |
| H  | 4.1494912402  | 1.6707389913  | -2.9440242789 |
| O  | 6.2150499308  | 0.3185675342  | -2.3886493501 |
| C  | 7.3272724053  | -0.4703702884 | -2.0466595619 |
| H  | 8.2103218996  | 0.0523389159  | -2.4322136029 |
| H  | 7.4193145921  | -0.5822094922 | -0.9537762586 |
| H  | 7.2722069825  | -1.4699202811 | -2.5104034599 |

TS4a

0 1

|    |               |               |               |
|----|---------------|---------------|---------------|
| O  | -0.4918203398 | -0.5483818971 | 1.6469778763  |
| C  | 0.3473209458  | -1.5969135236 | 1.4306006901  |
| C  | 1.5398198150  | -1.8791151918 | 2.3727405906  |
| C  | -0.1086160128 | -3.0450813451 | 1.6962410020  |
| C  | 1.3588038932  | -3.3913236047 | 2.0830910507  |
| H  | 1.2192219871  | -1.6471537546 | 3.3987774578  |
| H  | 2.5062750967  | -1.3916271812 | 2.1892731091  |
| H  | -0.7545119994 | -3.0311916401 | 2.5858404397  |
| H  | -0.6139569873 | -3.6166516643 | 0.9055641109  |
| C  | 0.6980233961  | -1.2246602300 | 0.0084464749  |
| C  | 0.0727172881  | -1.8782835335 | -1.0980812399 |
| H  | 0.0197740076  | -2.9667998536 | -0.9952085765 |
| H  | 0.3917840985  | -1.5484619443 | -2.0889795814 |
| Mg | -1.7824431815 | 0.7125777734  | 1.0182739280  |

|      |               |               |               |
|------|---------------|---------------|---------------|
| O    | -1.1458343844 | 2.0378995589  | -0.4736722518 |
| O    | -1.3940164844 | 2.5632501642  | 1.9299535070  |
| P    | -1.0720600528 | 3.1508105145  | 0.5630522748  |
| O    | 0.3674786966  | 3.8734336960  | 0.6139236957  |
| O    | -2.0744954103 | 4.3340080647  | 0.1369689630  |
| C    | -2.3264940516 | 5.3956638170  | 1.0414462882  |
| H    | -1.4167818254 | 5.9940358354  | 1.2124561469  |
| H    | -3.0969073668 | 6.0325284101  | 0.5893888469  |
| H    | -2.6872831416 | 5.0095999374  | 2.0069226609  |
| C    | 0.9312572552  | 4.3760485595  | -0.5867590109 |
| H    | 1.9051150823  | 4.8123878560  | -0.3327162830 |
| H    | 1.0730648816  | 3.5680625333  | -1.3211632698 |
| H    | 0.2886360841  | 5.1541222482  | -1.0288662513 |
| O    | -3.7460845368 | 0.4681592122  | 0.9721376202  |
| C    | -4.5300322153 | -0.0376081408 | 0.1394297172  |
| C    | -6.0272806325 | 0.1946576361  | 0.1814696832  |
| N    | -4.1777245115 | -0.8271658242 | -0.8663131491 |
| C    | -6.5386953050 | -0.5966454995 | -1.0189166983 |
| H    | -6.2197800961 | 1.2760533592  | 0.1301024859  |
| H    | -6.4126884569 | -0.1539736545 | 1.1509117512  |
| C    | -5.2799193571 | -1.2375260150 | -1.6162401075 |
| Br   | -1.9928450888 | -1.3953880493 | -1.0674310646 |
| H    | -7.2534265714 | -1.3909204039 | -0.7615709449 |
| H    | -7.0130628826 | 0.0270051707  | -1.7900580046 |
| O    | -5.2404791093 | -1.9703628057 | -2.5663601787 |
| C    | 1.6277007165  | -0.1061451463 | -0.2060826417 |
| C    | 2.3898509279  | -0.0627313115 | -1.3892867418 |
| C    | 1.8480398387  | 0.8836348492  | 0.7681505620  |
| C    | 3.3283020181  | 0.9379655055  | -1.5942681521 |
| H    | 2.2798291870  | -0.8415709744 | -2.1437065038 |
| C    | 2.7816313979  | 1.8887848690  | 0.5598299195  |
| H    | 1.2395130675  | 0.8882512922  | 1.6719055267  |
| C    | 3.5169049207  | 1.9223689232  | -0.6223758730 |
| H    | 3.9143040863  | 0.9539095524  | -2.5149056647 |
| H    | 2.9089440646  | 2.6669885075  | 1.3116169562  |
| C    | 1.5661716829  | -4.3393772677 | 3.2597674628  |
| H    | 1.2491932494  | -5.3631452614 | 3.0087513166  |
| H    | 2.6288598678  | -4.3782840158 | 3.5446264270  |
| H    | 0.9859422327  | -4.0068253024 | 4.1339929071  |
| C    | 2.1294091626  | -3.8738571439 | 0.8560297547  |
| C    | 3.2739157113  | -3.2341921561 | 0.3705612150  |
| C    | 1.6670609493  | -5.0030344971 | 0.1630803285  |
| C    | 3.9208500870  | -3.6884371436 | -0.7809815155 |
| H    | 3.6743329995  | -2.3595159436 | 0.8849242536  |
| C    | 2.3085336934  | -5.4617346391 | -0.9831371155 |
| H    | 0.7768981656  | -5.5266992316 | 0.5224613073  |
| C    | 3.4384162457  | -4.7990095919 | -1.4663558549 |
| H    | 4.8091272092  | -3.1642206518 | -1.1410036590 |
| H    | 1.9223459137  | -6.3391864886 | -1.5066028394 |
| H    | 3.9402834295  | -5.1522374763 | -2.3695875826 |
| C    | 4.4984052983  | 3.0348760861  | -0.8966083946 |
| F    | 4.1049741027  | 3.7699033025  | -1.9450520531 |
| F    | 4.6275494064  | 3.8628237206  | 0.1416598327  |
| F    | 5.7110878412  | 2.5566430451  | -1.1877749368 |
| TS4b |               |               |               |
| 0 1  |               |               |               |
| O    | -0.5281150000 | 0.0597230000  | 1.9778500000  |
| C    | -1.5838540000 | -0.2876470000 | 1.2672950000  |
| C    | -2.3886300000 | -1.7339900000 | 1.6462330000  |

|    |               |               |               |
|----|---------------|---------------|---------------|
| C  | -2.9190910000 | 0.4045550000  | 1.6034770000  |
| C  | -3.6845730000 | -0.9238740000 | 1.8503160000  |
| H  | -1.8896620000 | -2.0420230000 | 2.5747850000  |
| H  | -2.4084130000 | -2.5805420000 | 0.9475790000  |
| H  | -2.7674130000 | 0.9754670000  | 2.5267550000  |
| H  | -3.3079400000 | 1.0883340000  | 0.8370160000  |
| C  | -1.3581390000 | -0.7626230000 | -0.0947070000 |
| C  | -2.2649730000 | -0.3848700000 | -1.1761400000 |
| H  | -3.2992510000 | -0.1857350000 | -0.8893090000 |
| H  | -2.2112150000 | -0.9837290000 | -2.0890070000 |
| Mg | 0.8779720000  | 1.2708240000  | 1.4475200000  |
| O  | 2.3313270000  | 0.5649640000  | 0.0934980000  |
| O  | 2.6343530000  | 1.0003080000  | 2.5103870000  |
| P  | 3.3476400000  | 0.5941010000  | 1.2258880000  |
| O  | 4.0899260000  | -0.8168760000 | 1.4484320000  |
| O  | 4.5427830000  | 1.5995870000  | 0.8394590000  |
| C  | 5.4838390000  | 1.9780680000  | 1.8292000000  |
| H  | 6.0789380000  | 1.1123640000  | 2.1638080000  |
| H  | 6.1525580000  | 2.7201350000  | 1.3756470000  |
| H  | 4.9782830000  | 2.4201180000  | 2.7010370000  |
| C  | 4.8765040000  | -1.3476830000 | 0.3943770000  |
| H  | 5.1096140000  | -2.3880090000 | 0.6496500000  |
| H  | 4.3277730000  | -1.3222900000 | -0.5594480000 |
| H  | 5.8145780000  | -0.7822420000 | 0.2783340000  |
| O  | 0.5092090000  | 3.1138150000  | 0.9750580000  |
| C  | 0.3963760000  | 3.9049120000  | -0.0003870000 |
| C  | 0.9456690000  | 5.3200850000  | 0.0741370000  |
| N  | -0.1876900000 | 3.6335740000  | -1.1498120000 |
| C  | 0.6032880000  | 5.8890890000  | -1.2966860000 |
| H  | 2.0225150000  | 5.2731590000  | 0.2935830000  |
| H  | 0.4695950000  | 5.8452130000  | 0.9156950000  |
| C  | -0.1439700000 | 4.7403840000  | -1.9918750000 |
| Br | -1.3542800000 | 1.4170930000  | -1.3961710000 |
| H  | -0.0467040000 | 6.7751720000  | -1.2693680000 |
| H  | 1.4836110000  | 6.1532780000  | -1.9002700000 |
| O  | -0.6206530000 | 4.7907870000  | -3.0965900000 |
| C  | -4.2372600000 | -1.0472090000 | 3.2743150000  |
| H  | -5.0623690000 | -0.3348610000 | 3.4261910000  |
| H  | -4.6259060000 | -2.0608650000 | 3.4563400000  |
| H  | -3.4540180000 | -0.8330210000 | 4.0172710000  |
| C  | -4.7984780000 | -1.2275620000 | 0.8581350000  |
| C  | -5.0324540000 | -2.5276030000 | 0.3974580000  |
| C  | -5.6648490000 | -0.2111930000 | 0.4361320000  |
| C  | -6.0822990000 | -2.8012780000 | -0.4786150000 |
| H  | -4.3915020000 | -3.3486450000 | 0.7280410000  |
| C  | -6.7147620000 | -0.4797540000 | -0.4398120000 |
| H  | -5.5182480000 | 0.8107840000  | 0.7948310000  |
| C  | -6.9241060000 | -1.7767780000 | -0.9061400000 |
| H  | -6.2419650000 | -3.8235280000 | -0.8285660000 |
| H  | -7.3724410000 | 0.3310170000  | -0.7604140000 |
| H  | -7.7428720000 | -1.9883170000 | -1.5968010000 |
| C  | -0.1424870000 | -1.5419710000 | -0.4053090000 |
| C  | 0.3077280000  | -1.6644020000 | -1.7318480000 |
| C  | 0.5814020000  | -2.1935230000 | 0.6079500000  |
| C  | 1.4199110000  | -2.4323180000 | -2.0368830000 |
| H  | -0.1843180000 | -1.1212060000 | -2.5384090000 |
| C  | 1.6800120000  | -2.9846220000 | 0.3004470000  |
| H  | 0.2904330000  | -2.0712300000 | 1.6489630000  |
| C  | 2.0942720000  | -3.1129220000 | -1.0222840000 |
| H  | 1.7635530000  | -2.5027090000 | -3.0700460000 |

|   |              |               |               |
|---|--------------|---------------|---------------|
| H | 2.2241770000 | -3.4878880000 | 1.0993080000  |
| C | 3.2523290000 | -4.0066120000 | -1.3942390000 |
| F | 3.9071550000 | -4.4603880000 | -0.3221790000 |
| F | 4.1380480000 | -3.3660070000 | -2.1654510000 |
| F | 2.8317840000 | -5.0706390000 | -2.0844950000 |

TS4c

0 1

|    |               |               |               |
|----|---------------|---------------|---------------|
| O  | 0.2099257810  | 0.0504322824  | -2.2408620742 |
| C  | -0.8904252352 | -0.1597966344 | -1.5111186238 |
| C  | -1.6240645148 | 1.0829882365  | -0.9322659241 |
| C  | -2.2635584952 | -0.4475228671 | -2.3471211447 |
| C  | -2.9675343855 | 0.7141784427  | -1.6080076171 |
| H  | -1.1730964501 | 1.9811488288  | -1.3705895361 |
| H  | -1.6213376222 | 1.1953361918  | 0.1545815491  |
| H  | -1.9841934674 | -0.2248441589 | -3.3852141699 |
| H  | -2.7349120510 | -1.4401867260 | -2.3028290787 |
| C  | -3.5020153865 | 1.8006643154  | -2.5450809415 |
| H  | -4.3599856756 | 1.4322909676  | -3.1285698719 |
| H  | -3.8366968592 | 2.6742336706  | -1.9649062082 |
| H  | -2.7186205671 | 2.1305491947  | -3.2440777396 |
| C  | -4.0823399031 | 0.2767530321  | -0.6662758462 |
| C  | -4.2285704179 | 0.8376534740  | 0.6059577972  |
| C  | -5.0393276856 | -0.6556852486 | -1.0863422280 |
| C  | -5.2747542242 | 0.4573819800  | 1.4453385706  |
| H  | -3.5068700555 | 1.5774756404  | 0.9588190409  |
| C  | -6.0882279919 | -1.0385684370 | -0.2531902121 |
| H  | -4.9657794078 | -1.0941402125 | -2.0854977125 |
| C  | -6.2056578153 | -0.4886493877 | 1.0226866391  |
| H  | -5.3525125950 | 0.8930760228  | 2.4434047242  |
| H  | -6.8183773844 | -1.7720325752 | -0.6031095474 |
| C  | -0.8882335079 | -1.4205025658 | -0.7171844110 |
| C  | -0.2000285529 | -2.5458172944 | -1.2605997127 |
| H  | 0.0249496291  | -2.4818879312 | -2.3288189261 |
| H  | -0.4934450825 | -3.5305463694 | -0.8837398661 |
| C  | -1.6205347259 | -1.5539898145 | 0.5514979146  |
| C  | -1.2503095428 | -0.7621366396 | 1.6501509687  |
| C  | -2.6874485596 | -2.4506549412 | 0.6590322468  |
| C  | -1.9701790676 | -0.8580995693 | 2.8321917360  |
| H  | -0.3924627297 | -0.0866741254 | 1.5633310480  |
| C  | -3.4336406025 | -2.5079702772 | 1.8309628781  |
| H  | -2.9730596086 | -3.0679188467 | -0.1950662420 |
| C  | -3.0782291864 | -1.7058315337 | 2.9111258572  |
| H  | -1.6840946644 | -0.2495171891 | 3.6920455523  |
| H  | -4.3022030783 | -3.1628295876 | 1.8958928732  |
| Mg | 1.7568037098  | 0.7640508866  | -1.3336183997 |
| O  | 1.1325453872  | 1.2186922455  | 0.6704546589  |
| O  | 1.7066060695  | 2.8430795966  | -1.1112363719 |
| P  | 1.3024614584  | 2.6983493437  | 0.3472702518  |
| O  | -0.0389076722 | 3.5527086532  | 0.6118200867  |
| O  | 2.3697755410  | 3.3357246995  | 1.3654426945  |
| C  | 2.8626561874  | 4.6457548378  | 1.1356049307  |
| H  | 2.0586061171  | 5.3931233656  | 1.2326178760  |
| H  | 3.6304146879  | 4.8411749337  | 1.8942647205  |
| H  | 3.3062699562  | 4.7251038015  | 0.1317508389  |
| C  | -0.6892119258 | 3.4748258803  | 1.8653245491  |
| H  | -1.5214243234 | 4.1896236194  | 1.8473166558  |
| H  | -1.0862768897 | 2.4616723221  | 2.0434556097  |
| H  | -0.0042387029 | 3.7350172309  | 2.6882464764  |
| O  | 3.6713984905  | 0.3004335690  | -1.2668120476 |

|    |               |               |               |
|----|---------------|---------------|---------------|
| C  | 4.3435846322  | -0.4771295764 | -0.5464722509 |
| C  | 5.8332455531  | -0.2905648545 | -0.3320192629 |
| N  | 3.8669546704  | -1.5293100096 | 0.1003387713  |
| C  | 6.1914728673  | -1.4306534787 | 0.6156112199  |
| H  | 6.0116989500  | 0.7156605373  | 0.0738480476  |
| H  | 6.3403342622  | -0.3376294594 | -1.3072308978 |
| C  | 4.8731348584  | -2.1945303428 | 0.7995907101  |
| Br | 1.6543434458  | -2.1158050339 | -0.3944787468 |
| H  | 6.9523740698  | -2.1205987520 | 0.2247645222  |
| H  | 6.5393958498  | -1.0912773468 | 1.6019102359  |
| O  | 4.7262082215  | -3.2011129119 | 1.4388701832  |
| H  | -7.0173112407 | -0.7958396416 | 1.6852787060  |
| C  | -3.8863196928 | -1.7320692308 | 4.1847178741  |
| F  | -4.1785968254 | -0.4901935637 | 4.5947921562  |
| F  | -3.2166720003 | -2.3216943698 | 5.1785573802  |
| F  | -5.0411092730 | -2.3843141075 | 4.0352366296  |

TS4d

0 1

|    |               |               |               |
|----|---------------|---------------|---------------|
| C  | 0.8434333826  | -1.0713207222 | 0.3752853772  |
| C  | 1.8592044127  | -1.9471574286 | 1.1819654839  |
| C  | 2.5848880085  | -0.7350056289 | 1.8164647665  |
| H  | 2.4776622076  | -2.6509692570 | 0.6162750505  |
| H  | 1.2538844348  | -2.5082406439 | 1.9029340708  |
| C  | 1.1210949015  | -0.7347930753 | -1.0378812556 |
| C  | 0.0072399416  | -0.4144952471 | -1.8913704485 |
| H  | -0.8746923067 | -1.0504492125 | -1.7207601620 |
| H  | 0.2594792441  | -0.2645599230 | -2.9449361074 |
| Mg | -2.1369072550 | -0.4189113606 | 0.7690433661  |
| O  | -3.6258594582 | -1.7432656347 | 1.3599810740  |
| O  | -3.1898593119 | -1.0024355037 | -0.9628010660 |
| P  | -4.0595696067 | -1.9001092217 | -0.0908468250 |
| O  | -3.9439869168 | -3.4150032106 | -0.6207866761 |
| O  | -5.6268127527 | -1.5633703652 | -0.2134691811 |
| C  | -6.2253295152 | -1.4777731794 | -1.4948379073 |
| H  | -6.1915195837 | -2.4499190358 | -2.0131562950 |
| H  | -7.2719277084 | -1.1843179425 | -1.3463075924 |
| H  | -5.7166513506 | -0.7241992964 | -2.1153348994 |
| C  | -4.5131508695 | -4.4645552278 | 0.1424069082  |
| H  | -4.2562618444 | -5.4070896130 | -0.3569580212 |
| H  | -4.1085395498 | -4.4678246335 | 1.1659590458  |
| H  | -5.6099983277 | -4.3680185312 | 0.1918697452  |
| O  | -2.4658030791 | 1.3529246128  | 1.5757390671  |
| C  | -2.3972160949 | 2.5652611587  | 1.2564087291  |
| C  | -3.0276430804 | 3.6522464722  | 2.1083922641  |
| N  | -1.7888857073 | 3.0491513080  | 0.1850785924  |
| C  | -2.7052099449 | 4.9265964517  | 1.3358110266  |
| H  | -2.5918881463 | 3.6117045472  | 3.1177199042  |
| H  | -4.1016414339 | 3.4418456081  | 2.2165333181  |
| C  | -1.8840117886 | 4.4374866926  | 0.1339922463  |
| Br | -0.7021841013 | 1.3766328390  | -1.1248754348 |
| H  | -3.5939965758 | 5.4547603051  | 0.9615349854  |
| H  | -2.1104391409 | 5.6581216278  | 1.9008229819  |
| O  | -1.3972376221 | 5.1376551006  | -0.7137819279 |
| O  | -0.4233306608 | -1.2518262884 | 0.6959145433  |
| C  | 1.5818171317  | 0.2156663896  | 1.1334620419  |
| H  | 0.8033113535  | 0.6090954721  | 1.7976065207  |
| H  | 1.9756702315  | 1.0277262879  | 0.5139595852  |
| C  | 2.4900198629  | -0.6938002154 | 3.3443326235  |
| H  | 3.0910044603  | -1.5000582973 | 3.7922518039  |

|   |              |               |               |
|---|--------------|---------------|---------------|
| H | 2.8688830771 | 0.2648919092  | 3.7306868006  |
| H | 1.4467017753 | -0.8160092576 | 3.6726084927  |
| C | 4.0426578548 | -0.5848866855 | 1.4018491810  |
| C | 4.8951442437 | -1.6948878372 | 1.4714226842  |
| C | 4.5891207606 | 0.6388258152  | 1.0074588444  |
| C | 6.2392386183 | -1.5944947886 | 1.1233061309  |
| H | 4.4987362419 | -2.6605789645 | 1.7979229745  |
| C | 5.9350684200 | 0.7448176038  | 0.6554876170  |
| H | 3.9602634759 | 1.5305587826  | 0.9608255548  |
| C | 6.7641725785 | -0.3726207165 | 0.7025279581  |
| H | 6.8811493657 | -2.4767307517 | 1.1777980233  |
| H | 6.3339925547 | 1.7075204634  | 0.3301070290  |
| H | 7.8132336297 | -0.2920205363 | 0.4115378824  |
| C | 2.4788868996 | -0.5305228854 | -1.5821109429 |
| C | 3.4297362859 | -1.5551633595 | -1.6020585689 |
| C | 2.8200578455 | 0.7283765968  | -2.1089428444 |
| C | 4.7101681803 | -1.3201145693 | -2.0926774927 |
| H | 3.1743045537 | -2.5516963925 | -1.2453862182 |
| C | 4.1046769788 | 0.9691434893  | -2.5707190665 |
| H | 2.0830978638 | 1.5343793941  | -2.1110355353 |
| C | 5.0559783977 | -0.0534965634 | -2.5489067252 |
| H | 5.4492598714 | -2.1209544284 | -2.0867803743 |
| H | 4.3727308963 | 1.9617101950  | -2.9368816940 |
| C | 6.4547703968 | 0.2378113747  | -3.0338453940 |
| F | 7.3043934108 | -0.7476985068 | -2.7388586475 |
| F | 6.9329551278 | 1.3599505679  | -2.4836219633 |
| F | 6.4835601861 | 0.4104625934  | -4.3588175476 |

TS5a

0 1

|    |               |               |               |
|----|---------------|---------------|---------------|
| O  | -0.4964995793 | -0.6752142194 | 1.7456686448  |
| C  | -1.6989367148 | -0.5689698650 | 1.1157137117  |
| C  | -2.8276876109 | -1.5754442326 | 1.5378268646  |
| C  | -2.6245757786 | 0.5601216200  | 1.6411491840  |
| C  | -3.8373761907 | -0.4084887930 | 1.6838133872  |
| H  | -2.5547248289 | -1.9975840596 | 2.5153703473  |
| H  | -3.0799766872 | -2.3977359729 | 0.8539771196  |
| H  | -2.2771870515 | 0.7941054168  | 2.6561735173  |
| H  | -2.7110060643 | 1.5014879324  | 1.0808644740  |
| C  | -4.6343970764 | -0.4026623786 | 2.9900146545  |
| H  | -5.1926762413 | 0.5395123667  | 3.1070388006  |
| H  | -5.3631565981 | -1.2283646097 | 3.0070632224  |
| H  | -3.9634429514 | -0.5150971699 | 3.8555787123  |
| C  | -4.8040426539 | -0.2347218799 | 0.5192796227  |
| C  | -5.2999114470 | -1.3190058496 | -0.2106291075 |
| C  | -5.2804165688 | 1.0431180875  | 0.1958653538  |
| C  | -6.2201126621 | -1.1341775047 | -1.2429010132 |
| H  | -4.9663723800 | -2.3313717959 | 0.0256283468  |
| C  | -6.1978568900 | 1.2350887372  | -0.8337524498 |
| H  | -4.9218628664 | 1.9083282842  | 0.7600865793  |
| C  | -6.6691915027 | 0.1442440570  | -1.5640275076 |
| H  | -6.5868864172 | -1.9991236430 | -1.8007342211 |
| H  | -6.5463964663 | 2.2435716180  | -1.0686442864 |
| C  | -1.4795719318 | -0.5867983799 | -0.4122454571 |
| C  | -1.9469682239 | 0.3953596168  | -1.2495135114 |
| H  | -2.6694090279 | 1.1176027236  | -0.8766313886 |
| H  | -1.8579976546 | 0.3163214906  | -2.3333570301 |
| Mg | 1.2290905772  | -0.5142023852 | 1.0102604900  |
| O  | 2.5182510991  | -0.5902841693 | -0.7547374916 |
| O  | 2.5299796272  | -2.1161284376 | 1.2009750876  |

|    |               |               |               |
|----|---------------|---------------|---------------|
| P  | 3.1872001336  | -1.8038283785 | -0.1359598248 |
| O  | 3.0902158520  | -3.1138506243 | -1.0757746165 |
| O  | 4.7693086316  | -1.5358881729 | -0.0057634154 |
| C  | 5.5711720135  | -2.4478157703 | 0.7275681838  |
| H  | 5.5938386710  | -3.4355794851 | 0.2393360487  |
| H  | 6.5880447659  | -2.0371112190 | 0.7566655561  |
| H  | 5.1902577587  | -2.5655075593 | 1.7532187855  |
| C  | 3.5737543761  | -3.0493147789 | -2.4062214907 |
| H  | 3.3400714780  | -4.0079942301 | -2.8857171975 |
| H  | 3.0886615912  | -2.2313518971 | -2.9620418332 |
| H  | 4.6640869819  | -2.8914915178 | -2.4231931730 |
| O  | 2.2817986531  | 1.1720108359  | 1.5603052284  |
| C  | 2.5725374509  | 2.1567086442  | 0.8894684691  |
| C  | 3.8375184189  | 2.9668231735  | 1.0364286020  |
| N  | 1.8180560897  | 2.6817966274  | -0.1063129499 |
| C  | 3.7071466303  | 4.0802226995  | -0.0031765697 |
| H  | 4.6835062507  | 2.2875662737  | 0.8554732317  |
| H  | 3.9191350938  | 3.3192710236  | 2.0741783733  |
| C  | 2.3940756080  | 3.8057510733  | -0.7248859228 |
| Br | 0.1732199551  | 1.8373261280  | -0.6487097972 |
| H  | 3.6558909147  | 5.0872803046  | 0.4346079681  |
| H  | 4.5171597847  | 4.0906950879  | -0.7453347879 |
| O  | 1.9113298222  | 4.4082146978  | -1.6364198593 |
| H  | -7.3852245715 | 0.2908984552  | -2.3756011061 |
| N  | -0.6111266955 | -1.5614787880 | -0.8531698267 |
| C  | -0.5545883683 | -2.8787950959 | -0.2201131566 |
| H  | -0.6529222849 | -2.7901737201 | 0.8657572232  |
| H  | -1.3450784479 | -3.5428223828 | -0.6139202825 |
| H  | 0.4235786935  | -3.3325730019 | -0.4321789659 |
| C  | -0.2076786362 | -1.5619262545 | -2.2448536455 |
| H  | 0.1834820845  | -0.5756568700 | -2.5288162424 |
| H  | 0.6036665408  | -2.2890557463 | -2.3706392383 |
| H  | -1.0390594777 | -1.8324571367 | -2.9224274241 |

TS5b

0 1

|   |               |               |               |
|---|---------------|---------------|---------------|
| O | 0.0182896017  | -1.0374450131 | 1.4931805717  |
| C | -1.0783888211 | -0.8039737271 | 0.8682835491  |
| C | -2.5169674894 | -2.0636595714 | 0.7703726606  |
| C | -2.1547504347 | 0.0399104587  | 1.5471769044  |
| C | -3.3346019690 | -0.9615540291 | 1.4651082014  |
| H | -2.0936611987 | -2.8117583534 | 1.4514175740  |
| H | -2.9384154358 | -2.5593749440 | -0.1125984072 |
| H | -1.8264239879 | 0.2171176719  | 2.5781161683  |
| H | -2.2899690849 | 1.0189582387  | 1.0665665772  |
| C | -3.8052392806 | -1.4081848197 | 2.8568704032  |
| H | -4.2826200590 | -0.5695087381 | 3.3859557987  |
| H | -4.5400026413 | -2.2237651744 | 2.7770903801  |
| H | -2.9550339755 | -1.7604398959 | 3.4610094156  |
| C | -4.5486061359 | -0.4784732673 | 0.6787437309  |
| C | -5.3469970653 | -1.3771007973 | -0.0386521972 |
| C | -4.9415516931 | 0.8646421056  | 0.7195446919  |
| C | -6.4848518134 | -0.9447132592 | -0.7175230555 |
| H | -5.0849969478 | -2.4377708696 | -0.0670250334 |
| C | -6.0781037505 | 1.3018072288  | 0.0412139918  |
| H | -4.3523568132 | 1.5886850670  | 1.2870935335  |
| C | -6.8517833944 | 0.3993233458  | -0.6857507818 |
| H | -7.0885783867 | -1.6644706264 | -1.2747126535 |
| H | -6.3579557715 | 2.3565999879  | 0.0810770066  |
| C | -1.1941995939 | -1.1058394891 | -0.5369658063 |



|    |               |               |               |
|----|---------------|---------------|---------------|
| C  | -1.9369014341 | -0.1284808010 | -1.4000741314 |
| H  | -2.8760386285 | 0.1979617919  | -0.9467922635 |
| H  | -2.1487979256 | -0.4983933474 | -2.4073233707 |
| Mg | 1.7220101010  | -0.1761588026 | 0.9889530766  |
| O  | 2.6531903759  | -0.9785671368 | -0.7207800119 |
| O  | 3.3696891270  | -1.2773214108 | 1.6259246720  |
| P  | 3.7293133815  | -1.5756983302 | 0.1772531370  |
| O  | 3.8761419405  | -3.1707552664 | -0.0184506926 |
| O  | 5.1671723405  | -1.0021874338 | -0.2467121158 |
| C  | 6.2813231054  | -1.1851902394 | 0.6124982497  |
| H  | 6.5649191381  | -2.2487276312 | 0.6711909492  |
| H  | 7.1146529451  | -0.6121175561 | 0.1881279600  |
| H  | 6.0572822892  | -0.8179684709 | 1.6250622731  |
| C  | 4.2546932737  | -3.6901568338 | -1.2803503638 |
| H  | 4.2635936293  | -4.7838425398 | -1.1941646883 |
| H  | 3.5387660777  | -3.3903092210 | -2.0628798838 |
| H  | 5.2577274242  | -3.3393736675 | -1.5702133306 |
| O  | 1.8366425866  | 1.7048968800  | 1.3010927243  |
| C  | 1.8185775954  | 2.8501080238  | 0.7519024928  |
| C  | 2.4296181434  | 4.0441205942  | 1.4708411491  |
| N  | 1.3001127724  | 3.1291946923  | -0.4174659117 |
| C  | 2.2187715631  | 5.1703000471  | 0.4695965230  |
| H  | 3.4823720869  | 3.8275656254  | 1.7056580676  |
| H  | 1.9122076993  | 4.1890980276  | 2.4314646713  |
| C  | 1.4512510311  | 4.4868613299  | -0.6779271301 |
| Br | -0.7263124728 | 1.4084514141  | -1.4599735766 |
| H  | 1.6246583011  | 6.0132189329  | 0.8504004706  |
| H  | 3.1535374718  | 5.5896785748  | 0.0694384970  |
| O  | 1.0406383891  | 5.0578810432  | -1.6574600634 |
| H  | -7.7390933682 | 0.7413972922  | -1.2221976628 |
| N  | -0.3687858482 | -1.9911352217 | -1.1352791473 |
| C  | 0.2431373258  | -3.1129329553 | -0.4367050519 |
| H  | 0.0963467262  | -3.0421247638 | 0.6424017639  |
| H  | -0.1982824213 | -4.0527201023 | -0.8099383018 |
| H  | 1.3249095648  | -3.1215489231 | -0.6224240639 |
| C  | -0.2053507261 | -2.0429893540 | -2.5782132621 |
| H  | -0.1610956708 | -1.0368900391 | -3.0121698041 |
| H  | 0.7636023183  | -2.5140344733 | -2.7843704964 |
| H  | -0.9961150869 | -2.6347352773 | -3.0725185767 |

TS5c

0 1

|   |               |               |               |
|---|---------------|---------------|---------------|
| O | -0.1445715782 | -0.3905741650 | 1.0725377774  |
| C | -1.5210616503 | -0.0942567145 | 1.1105103210  |
| C | -2.5115344629 | -0.4984317494 | 2.2016887680  |
| C | -2.1071059778 | 1.3142336488  | 1.1360309816  |
| C | -3.4024928910 | 0.6759314634  | 1.7166950365  |
| H | -2.0849660328 | -0.2704290533 | 3.1898119582  |
| H | -2.9240154289 | -1.5119931711 | 2.2189003638  |
| H | -1.5768551843 | 1.9127292822  | 1.8926298227  |
| H | -2.1729776620 | 1.8917719292  | 0.2068404793  |
| C | -4.1457615230 | 1.4535889717  | 2.7967158628  |
| H | -4.6087915743 | 2.3625997240  | 2.3845895663  |
| H | -4.9466084865 | 0.8389210709  | 3.2353635376  |
| H | -3.4593290261 | 1.7556595476  | 3.6023426735  |
| C | -4.3347434982 | 0.2922376293  | 0.5676048132  |
| C | -4.7492172187 | -1.0185087041 | 0.3145841668  |
| C | -4.7990942150 | 1.3029093930  | -0.2880066157 |
| C | -5.5915901615 | -1.3128558337 | -0.7594211472 |
| H | -4.4141318785 | -1.8363343379 | 0.9532609303  |

|    |               |               |               |
|----|---------------|---------------|---------------|
| C  | -5.6400110823 | 1.0155539941  | -1.3587768234 |
| H  | -4.4907080135 | 2.3379180344  | -0.1168279245 |
| C  | -6.0386433956 | -0.2995349410 | -1.6016875591 |
| H  | -5.8976824720 | -2.3465272804 | -0.9356445827 |
| H  | -5.9832635357 | 1.8225032132  | -2.0098252356 |
| C  | -1.1856997682 | -0.8594718474 | -0.0914332335 |
| C  | -1.0586008137 | -0.1009356876 | -1.4062225331 |
| H  | -2.0606798230 | 0.2518687154  | -1.6922219008 |
| H  | -0.6570463405 | -0.7332077555 | -2.1985676578 |
| Mg | 1.7496978830  | 0.0079705573  | 0.5744434978  |
| O  | 2.0176117034  | -1.4447359885 | -0.9503900383 |
| O  | 2.6832688312  | -1.6744225076 | 1.4187407012  |
| P  | 2.7155430688  | -2.3499465386 | 0.0590385310  |
| O  | 2.0303666860  | -3.8105441976 | 0.1613911239  |
| O  | 4.2040810947  | -2.6694700206 | -0.4532593553 |
| C  | 5.1656461253  | -3.1910621534 | 0.4506633961  |
| H  | 4.9072360895  | -4.2186953922 | 0.7552388753  |
| H  | 6.1292758032  | -3.2022652124 | -0.0729921999 |
| H  | 5.2386496284  | -2.5604033501 | 1.3489375064  |
| C  | 2.1379073136  | -4.7259501802 | -0.9141421680 |
| H  | 1.4464626201  | -5.5530578932 | -0.7078065490 |
| H  | 1.8647191823  | -4.2579149946 | -1.8732755102 |
| H  | 3.1615619082  | -5.1227901535 | -0.9953882014 |
| O  | 2.7076565366  | 1.6006106189  | 1.0731352451  |
| C  | 2.8012594507  | 2.7714296261  | 0.5864087023  |
| C  | 3.7265248740  | 3.7955305571  | 1.2223638309  |
| N  | 2.1477020630  | 3.2069278499  | -0.4617489131 |
| C  | 3.5343586121  | 5.0087412268  | 0.3229833087  |
| H  | 4.7512300871  | 3.3956330945  | 1.2413723977  |
| H  | 3.4268387650  | 3.9528815463  | 2.2695001496  |
| C  | 2.4877074041  | 4.5342312902  | -0.7032939988 |
| Br | 0.1386156221  | 1.4278667511  | -1.3368120016 |
| H  | 3.1521060740  | 5.8999953273  | 0.8408670373  |
| H  | 4.4441100154  | 5.3142686457  | -0.2140478583 |
| O  | 2.0342626218  | 5.2221249343  | -1.5828196665 |
| H  | -6.6948211060 | -0.5302766824 | -2.4434845539 |
| N  | -1.3325665309 | -2.2196714219 | -0.1893538712 |
| C  | -1.2060494437 | -3.0702538754 | 0.9878818134  |
| H  | -1.0375456429 | -2.4784191820 | 1.8898599168  |
| H  | -2.0996241314 | -3.7014653347 | 1.1231752166  |
| H  | -0.3182032697 | -3.7119941213 | 0.8788958555  |
| C  | -1.0290079387 | -2.9109500805 | -1.4353489066 |
| H  | 0.0273926406  | -2.7922498940 | -1.7280576964 |
| H  | -1.2341647375 | -3.9781469513 | -1.2839611388 |
| H  | -1.6817402092 | -2.5786412756 | -2.2544873239 |

### Real Model with Real Catalyst

(2R,4R)-CYr

0 1

|   |               |               |               |
|---|---------------|---------------|---------------|
| O | -2.3331166078 | -1.7724600244 | 0.2418225517  |
| C | -3.2453540315 | -1.0327399451 | -0.0883920137 |
| C | -5.2470441729 | -0.1929619605 | -1.1029416603 |
| C | -3.3285233808 | 0.4396268306  | 0.1445231470  |
| C | -4.8219556901 | 0.7947334979  | 0.0120743560  |
| H | -4.9283433348 | 0.2236748345  | -2.0699161225 |
| H | -6.3314652331 | -0.3521004334 | -1.1698298658 |
| H | -2.7725692734 | 0.8565647298  | -0.7226376242 |
| H | -2.7820122360 | 0.7945310375  | 1.0290062958  |
| C | -4.4728057947 | -1.5201570907 | -0.8700503676 |

|    |               |               |               |
|----|---------------|---------------|---------------|
| C  | -5.3149024536 | -2.4344065369 | 0.0400619760  |
| H  | -5.5183041504 | -1.9465561961 | 0.9998208178  |
| H  | -6.2792136947 | -2.6455845958 | -0.4370319892 |
| O  | 0.4815640634  | -2.1791079690 | 2.4736988557  |
| C  | 0.0565638321  | -1.1680594157 | 3.0655668632  |
| C  | 0.1835495618  | -0.8549518668 | 4.5381905823  |
| N  | -0.6104564345 | -0.2281554081 | 2.3807924890  |
| C  | -0.6051124735 | 0.4472449820  | 4.6610698607  |
| H  | -0.2147025938 | -1.6923953851 | 5.1278794778  |
| H  | 1.2487496721  | -0.7521838340 | 4.7894501857  |
| C  | -1.0880827636 | 0.7341483911  | 3.2357414786  |
| Br | -4.5339236796 | -4.1596677568 | 0.4781426530  |
| H  | 0.0017094816  | 1.2963007391  | 5.0030254943  |
| H  | -1.4779087102 | 0.3798840651  | 5.3254786135  |
| O  | -1.8187890251 | 1.6538649597  | 2.9246114696  |
| C  | -5.0370762123 | 2.2467481168  | -0.4261599453 |
| H  | -4.7564127423 | 2.9413780970  | 0.3798319248  |
| H  | -6.0922811749 | 2.4314365050  | -0.6749558268 |
| H  | -4.4217483767 | 2.4904799782  | -1.3127775413 |
| C  | -5.6043789684 | 0.5556558850  | 1.3119638735  |
| C  | -7.0047175123 | 0.4717565777  | 1.2725776714  |
| C  | -4.9801732147 | 0.4613286785  | 2.5605705456  |
| C  | -7.7517489556 | 0.2652485716  | 2.4281753194  |
| H  | -7.5304390926 | 0.5686845114  | 0.3194982503  |
| C  | -5.7272411478 | 0.2526567585  | 3.7215282499  |
| H  | -3.9000161976 | 0.5752330523  | 2.6514564194  |
| C  | -7.1129453745 | 0.1444852257  | 3.6623159192  |
| H  | -8.8400170644 | 0.1984316091  | 2.3643230171  |
| H  | -5.2118895624 | 0.1801926308  | 4.6817257686  |
| H  | -7.6946805459 | -0.0234458032 | 4.5708956019  |
| C  | -4.0852961411 | -2.1378638892 | -2.2111015400 |
| C  | -4.8864950367 | -3.1002704416 | -2.8329083026 |
| C  | -2.9710377179 | -1.6465356693 | -2.9060286954 |
| C  | -4.5876739885 | -3.5568794811 | -4.1158158811 |
| H  | -5.7582246083 | -3.5122338741 | -2.3219245182 |
| C  | -2.6747452536 | -2.1004786775 | -4.1891776272 |
| H  | -2.3009886370 | -0.9044019046 | -2.4549851288 |
| C  | -3.4827453066 | -3.0573829504 | -4.8006415498 |
| H  | -5.2272540472 | -4.3102723305 | -4.5805599803 |
| H  | -1.7989876637 | -1.7000746661 | -4.7045288326 |
| H  | -3.2511709105 | -3.4140647991 | -5.8062666989 |
| Mg | -0.3060024274 | -1.3814475706 | 0.5943884627  |
| O  | -0.3038310612 | -0.2680384286 | -1.0892696431 |
| P  | 1.1647908468  | -0.0721010583 | -1.4542374876 |
| O  | 1.7796482750  | -0.5023330634 | -2.7220550096 |
| O  | 1.6747460503  | 1.4376872777  | -1.0833401007 |
| O  | 1.7694405560  | -0.8839159589 | -0.0851327176 |
| C  | 1.5588696830  | 1.9673641774  | 0.1787625982  |
| C  | 3.0998074666  | -0.7098157536 | 0.2535387154  |
| C  | 2.3866391058  | 1.4804500155  | 1.1803663057  |
| C  | 0.6492089478  | 3.0404084671  | 0.4039870063  |
| C  | 3.4431996085  | 0.4847338798  | 0.8552914347  |
| C  | 4.0468988636  | -1.7150198258 | -0.0677232580 |
| C  | 2.2272380080  | 1.9745479817  | 2.5161114475  |
| C  | 0.5838251322  | 3.5824110367  | 1.6666812097  |
| Si | -0.3407912351 | 3.9264025365  | -0.9417830000 |
| C  | 4.8318687812  | 0.7591087121  | 1.0936085627  |
| C  | 5.3697377648  | -1.4749463497 | 0.2201926077  |
| Si | 3.6165348462  | -3.3451751027 | -0.9090694531 |
| C  | 2.9269418027  | 1.4250713774  | 3.6283813594  |

|   |               |               |               |
|---|---------------|---------------|---------------|
| C | 1.3385684579  | 3.0591310345  | 2.7499441635  |
| H | -0.0675274830 | 4.4377477806  | 1.8833803506  |
| C | -0.8438411656 | 2.8551782570  | -2.3906437097 |
| C | -1.8683936578 | 4.6930315734  | -0.1616614665 |
| C | 0.7347700087  | 5.3215382709  | -1.5965129518 |
| C | 5.2973518699  | 2.0127583108  | 1.5821468297  |
| C | 5.7961118198  | -0.2447523271 | 0.7911209232  |
| H | 6.1385921751  | -2.2210654108 | -0.0153945802 |
| C | 4.4904064685  | -3.3860250642 | -2.5592302782 |
| C | 4.1890110743  | -4.7762816145 | 0.1654659136  |
| C | 1.7625767290  | -3.5196359893 | -1.0700187606 |
| C | 2.7886206825  | 1.9625507127  | 4.8855364502  |
| H | 3.5828046180  | 0.5672493886  | 3.4737002828  |
| C | 1.2222722254  | 3.5996326140  | 4.0592302244  |
| C | -2.1741460704 | 2.4879908835  | -2.6398976092 |
| C | 0.1572696168  | 2.4267721763  | -3.2814645217 |
| C | -2.3871156841 | 5.8825825029  | -0.7023356906 |
| C | -2.4896603622 | 4.1390195135  | 0.9691657831  |
| C | 1.7332817293  | 5.9090879072  | -0.8037272835 |
| C | 0.5261860580  | 5.8156968137  | -2.8961724598 |
| C | 6.6354667949  | 2.2357976414  | 1.7954382425  |
| H | 4.5798674381  | 2.8096705393  | 1.7771256592  |
| C | 7.1732894383  | 0.0133370633  | 1.0333998975  |
| C | 5.4523103615  | -4.3565602787 | -2.8833627344 |
| C | 4.1943552637  | -2.3824331895 | -3.4988328679 |
| C | 3.9771202217  | -6.0822990958 | -0.3138709586 |
| C | 4.7762026262  | -4.6082258788 | 1.4278017940  |
| C | 1.0091188699  | -3.6537059635 | 0.1155552248  |
| C | 1.1019543899  | -3.5045246599 | -2.3028798928 |
| C | 1.9394288828  | 3.0739835483  | 5.1055670367  |
| H | 3.3377123385  | 1.5269887489  | 5.7230871102  |
| H | 0.5390458773  | 4.4371648396  | 4.2189811740  |
| C | -2.4995084934 | 1.6960101811  | -3.7472944216 |
| H | -2.9817220540 | 2.8197728969  | -1.9729228011 |
| C | -0.1646402475 | 1.6216033972  | -4.3787082835 |
| H | 1.2065700234  | 2.7077538667  | -3.1192873503 |
| C | -3.4902005363 | 6.5125543834  | -0.1154637795 |
| H | -1.9318594759 | 6.3388185070  | -1.5857160204 |
| C | -3.5815332283 | 4.7790783376  | 1.5677146292  |
| H | -2.1301970794 | 3.1972411651  | 1.4113208993  |
| C | 2.5042917888  | 6.9689706016  | -1.2963286024 |
| H | 1.9284189151  | 5.5458292406  | 0.2077595474  |
| C | 1.2957439067  | 6.8746530800  | -3.3890426856 |
| H | -0.2362134029 | 5.3741503698  | -3.5436313954 |
| C | 7.5873608751  | 1.2227653776  | 1.5314189978  |
| H | 6.9684763321  | 3.2078536310  | 2.1648926581  |
| H | 7.8997001837  | -0.7699770260 | 0.8027645201  |
| C | 6.0985116738  | -4.3330317054 | -4.1244773517 |
| H | 5.7144246024  | -5.1425923516 | -2.1718243042 |
| C | 4.8411398970  | -2.3599832321 | -4.7393687351 |
| H | 3.4513967814  | -1.5965140110 | -3.2775537176 |
| C | 4.3594990281  | -7.1916005956 | 0.4467042329  |
| H | 3.5052249670  | -6.2479740394 | -1.2868965811 |
| C | 5.1595789892  | -5.7187977202 | 2.1904043229  |
| H | 4.9372518629  | -3.6097257558 | 1.8398712005  |
| C | -0.3903534296 | -3.7647524872 | 0.0599986820  |
| H | 1.5095012992  | -3.7090413056 | 1.0957210544  |
| C | -0.2956653612 | -3.6130068430 | -2.3600996420 |
| H | 1.6607335660  | -3.3910989799 | -3.2379787050 |
| H | 1.8441466163  | 3.4968683337  | 6.1074642142  |

|   |               |               |               |
|---|---------------|---------------|---------------|
| C | -1.4942671872 | 1.2588613639  | -4.6147199951 |
| H | -3.5341041640 | 1.4204391421  | -3.9359650571 |
| H | 0.6271243864  | 1.2646011590  | -5.0371621952 |
| C | -4.0835505428 | 5.9656288773  | 1.0262788068  |
| H | -3.8805296270 | 7.4329918615  | -0.5435099454 |
| H | -4.0350072829 | 4.3482704036  | 2.4594090276  |
| C | 2.2859132415  | 7.4532472729  | -2.5887614092 |
| H | 3.2763610293  | 7.4134366357  | -0.6722144949 |
| H | 1.1262935708  | 7.2459895780  | -4.3972614468 |
| H | 8.6476587838  | 1.4119568410  | 1.7093323014  |
| C | 5.7921602738  | -3.3348373580 | -5.0542316267 |
| H | 6.8402316202  | -5.0906649576 | -4.3647375983 |
| H | 4.6018038956  | -1.5773494958 | -5.4568240108 |
| C | 4.9541788273  | -7.0106125655 | 1.6999142408  |
| H | 4.1916526957  | -8.1964044181 | 0.0651117735  |
| H | 5.6154651856  | -5.5738724391 | 3.1673214003  |
| C | -1.0394761813 | -3.7325510074 | -1.1888611293 |
| H | -0.9710499085 | -3.9737656043 | 0.9684973152  |
| H | -0.7976416283 | -3.6014217358 | -3.3264893031 |
| H | -1.7456177914 | 0.6389474487  | -5.4727823363 |
| H | -4.9315353562 | 6.4630796710  | 1.4922777492  |
| H | 2.8858260727  | 8.2757933169  | -2.9724704388 |
| H | 6.2944064197  | -3.3157315377 | -6.0191659061 |
| H | 5.2523484329  | -7.8737258720 | 2.2914844174  |
| H | -2.1290833165 | -3.8108442955 | -1.2317149835 |

(2R,4S)-CYr

0 1

|    |               |               |               |
|----|---------------|---------------|---------------|
| C  | -3.4538414764 | -1.2797112173 | -0.4637782937 |
| C  | -2.9509993807 | -2.1282843069 | 0.6558475463  |
| C  | -4.1873956866 | -2.5973726496 | 1.4390883527  |
| H  | -2.1340630702 | -1.6490233726 | 1.2157901931  |
| H  | -2.4658964031 | -2.9796813549 | 0.1424070389  |
| C  | -4.9782644023 | -1.3631263950 | -0.5594253258 |
| C  | -5.4316221814 | -1.4717377190 | -2.0197926693 |
| H  | -5.0964571755 | -0.5957493596 | -2.5862697200 |
| H  | -6.5241828960 | -1.5471724811 | -2.0758070318 |
| Mg | -0.7150969929 | -0.6374431613 | -1.7793407749 |
| O  | -0.2772897818 | 0.6786696486  | -0.0713290851 |
| O  | 1.3320614154  | -0.2608158208 | -1.7033141360 |
| O  | -0.7159481546 | -2.7752768773 | -1.3432748941 |
| C  | -0.8872274076 | -3.0063179571 | -2.5588662211 |
| C  | -0.9993665041 | -4.3650539117 | -3.2122207853 |
| N  | -0.9952474987 | -1.9951182164 | -3.4263282524 |
| C  | -1.2684321760 | -4.0042182379 | -4.6729488824 |
| H  | -1.7963847323 | -4.9449337412 | -2.7259049363 |
| H  | -0.0538615249 | -4.9084114249 | -3.0529918365 |
| C  | -1.1984917966 | -2.4687714449 | -4.7065731013 |
| Br | -4.7232299607 | -3.0208519816 | -2.9750314391 |
| H  | -0.5334140810 | -4.4153125328 | -5.3781569033 |
| H  | -2.2636116245 | -4.3134630632 | -5.0239695707 |
| O  | -1.3110707311 | -1.7871583154 | -5.6973524919 |
| O  | -2.7715113681 | -0.6548101111 | -1.2586659940 |
| C  | -5.2585699866 | -2.6023594256 | 0.3133365753  |
| H  | -5.1083458333 | -3.5008980121 | -0.3044296129 |
| H  | -6.2822271346 | -2.6507201363 | 0.7021352646  |
| C  | -3.9720245340 | -4.0048148842 | 2.0087068969  |
| H  | -3.1968431757 | -3.9922963348 | 2.7892309524  |
| H  | -4.8918367641 | -4.4085644875 | 2.4545508094  |
| H  | -3.6548315556 | -4.6977381860 | 1.2143244584  |

|    |               |               |               |
|----|---------------|---------------|---------------|
| C  | -4.6075197346 | -1.6282287106 | 2.5518867748  |
| C  | -3.9655155323 | -0.4097523364 | 2.7870647184  |
| C  | -5.7294382151 | -1.9350744643 | 3.3358434394  |
| C  | -4.4384762593 | 0.4786080546  | 3.7533687547  |
| H  | -3.0942122274 | -0.1132506142 | 2.2007896495  |
| C  | -6.2004272334 | -1.0560070349 | 4.3053605884  |
| H  | -6.2645893080 | -2.8746276633 | 3.1764626282  |
| C  | -5.5575944200 | 0.1637919337  | 4.5158759614  |
| H  | -3.9222325862 | 1.4354592953  | 3.8911093932  |
| H  | -7.0794751520 | -1.3225527715 | 4.8964765314  |
| H  | -5.9291230520 | 0.8622596242  | 5.2683718711  |
| C  | -5.5935014874 | -0.0524050400 | -0.0179794112 |
| C  | -4.9614467316 | 1.1808818474  | -0.2182943377 |
| C  | -6.8235553136 | -0.0656691049 | 0.6485408901  |
| C  | -5.5240811486 | 2.3588672840  | 0.2695076863  |
| H  | -4.0060972530 | 1.2354166108  | -0.7431784905 |
| C  | -7.3868363038 | 1.1104849258  | 1.1345769322  |
| H  | -7.3524323872 | -1.0037169081 | 0.8158248666  |
| C  | -6.7348205247 | 2.3285288689  | 0.9552737781  |
| H  | -4.9966267054 | 3.3059569910  | 0.1234432653  |
| H  | -8.3396198418 | 1.0694843199  | 1.6658463168  |
| H  | -7.1692430596 | 3.2499719330  | 1.3477606154  |
| P  | 1.1804042629  | 0.6323903140  | -0.4884261095 |
| O  | 2.0892373117  | 0.2216786642  | 0.7858872988  |
| O  | 1.8526199770  | 2.0623996747  | -0.8655593749 |
| C  | 3.4629396371  | 0.3043872713  | 0.6322180098  |
| C  | 2.1016834671  | 2.9685855128  | 0.1422486270  |
| C  | 4.0505727190  | 1.5552406603  | 0.7019191530  |
| C  | 4.1901407453  | -0.8889154505 | 0.3862211360  |
| C  | 3.1916583245  | 2.7435757945  | 0.9641083101  |
| C  | 1.2226019213  | 4.0695615772  | 0.2953946442  |
| C  | 5.4571273762  | 1.6628254392  | 0.4447527166  |
| C  | 5.5496959000  | -0.7852432123 | 0.2060012908  |
| Si | 3.3819147401  | -2.6001993101 | 0.3615413190  |
| C  | 3.4084234624  | 3.6334582211  | 2.0663581602  |
| C  | 1.4687840848  | 4.9536684318  | 1.3202769271  |
| Si | -0.3103841366 | 4.3299606926  | -0.7816476436 |
| C  | 6.1310465649  | 2.9140146613  | 0.3674021597  |
| C  | 6.2098855247  | 0.4752179193  | 0.2157310211  |
| H  | 6.1640471487  | -1.6771411823 | 0.0331704074  |
| C  | 1.8411462203  | -2.6568732896 | 1.4214615178  |
| C  | 3.0477393665  | -3.2363570626 | -1.3663008563 |
| C  | 4.6504145964  | -3.7515509203 | 1.1488131887  |
| C  | 4.4264431966  | 3.4185464718  | 3.0378475032  |
| C  | 2.5491363280  | 4.7598085227  | 2.2256876144  |
| H  | 0.8136099109  | 5.8178319354  | 1.4856973053  |
| C  | -1.7454167131 | 4.4041981144  | 0.4180084089  |
| C  | -0.1461731743 | 5.9608381154  | -1.6951767287 |
| C  | -0.5648434325 | 3.0016104682  | -2.0694671228 |
| C  | 7.4806433677  | 2.9754459400  | 0.1201760947  |
| H  | 5.5622651253  | 3.8346077720  | 0.4998978900  |
| C  | 7.6076450441  | 0.5724643497  | -0.0260513974 |
| C  | 0.7753568820  | -3.5111683130 | 1.0987246401  |
| C  | 1.7747489867  | -1.9130480822 | 2.6134915946  |
| C  | 2.9114948129  | -2.3962682754 | -2.4794935713 |
| C  | 2.9029209356  | -4.6266843893 | -1.5452030637 |
| C  | 4.6474455705  | -3.9918469567 | 2.5317614772  |
| C  | 5.6393702563  | -4.3647044559 | 0.3599881961  |
| C  | 4.6035134642  | 4.2936447694  | 4.0811695807  |
| H  | 5.0678684925  | 2.5409981571  | 2.9509354129  |

|   |               |               |               |
|---|---------------|---------------|---------------|
| C | 2.7657424517  | 5.6519306410  | 3.3119177772  |
| C | -2.5339531363 | 5.5518346974  | 0.5873305503  |
| C | -1.9798057095 | 3.2840199110  | 1.2362691474  |
| C | -1.1882724710 | 6.3389845134  | -2.5617967083 |
| C | 0.9689440705  | 6.8023243398  | -1.5714987891 |
| C | 0.4370040008  | 2.8504986174  | -3.0504614386 |
| C | -1.6711235680 | 2.1421708310  | -2.0934843229 |
| C | 8.2341513419  | 1.7926453332  | -0.0673081406 |
| H | 7.9756915292  | 3.9470114654  | 0.0623936903  |
| H | 8.1747061220  | -0.3479824887 | -0.1874202570 |
| C | -0.3024804245 | -3.6675148143 | 1.9794684255  |
| H | 0.7558789522  | -4.0469245787 | 0.1437734240  |
| C | 0.6877075158  | -2.0527180322 | 3.4826136753  |
| H | 2.5624790818  | -1.1973810853 | 2.8657016287  |
| C | 2.6351559802  | -2.9312723528 | -3.7465780350 |
| H | 2.9984681352  | -1.3055056277 | -2.3806823381 |
| C | 2.6357771652  | -5.1603297456 | -2.8083841186 |
| H | 3.0042459911  | -5.3097962990 | -0.6969955227 |
| C | 5.6119737572  | -4.8230127123 | 3.1145882347  |
| H | 3.8894334464  | -3.5375488692 | 3.1749937199  |
| C | 6.6034471462  | -5.1951075705 | 0.9407497318  |
| H | 5.6642806748  | -4.2069279214 | -0.7216105680 |
| C | 3.7726529032  | 5.4311771088  | 4.2175282453  |
| H | 5.3891013153  | 4.1064336711  | 4.8161731049  |
| H | 2.1041333073  | 6.5155597855  | 3.4180991682  |
| C | -3.5359485212 | 5.5891690199  | 1.5647431751  |
| H | -2.3749139069 | 6.4342297742  | -0.0372727635 |
| C | -2.9707058923 | 3.3302992154  | 2.2213197408  |
| H | -1.3884449788 | 2.3628816215  | 1.1107314237  |
| C | -1.1192398441 | 7.5381732466  | -3.2776409998 |
| H | -2.0633989425 | 5.6961363358  | -2.6929894381 |
| C | 1.0388993323  | 8.0033202828  | -2.2887426853 |
| H | 1.8025847469  | 6.5317368396  | -0.9197145727 |
| C | 0.3402324235  | 1.8489979868  | -4.0191616822 |
| H | 1.3180256483  | 3.5018384699  | -3.0491608408 |
| C | -1.7904870683 | 1.1563613062  | -3.0913671146 |
| H | -2.4636826872 | 2.2237756118  | -1.3412973076 |
| H | 9.3074411869  | 1.8549614922  | -0.2567814348 |
| C | -0.3459386722 | -2.9420575202 | 3.1726529213  |
| H | -1.1051201265 | -4.3557838763 | 1.7285527542  |
| H | 0.6452630825  | -1.4659984594 | 4.3971127201  |
| C | 2.5024061559  | -4.3099679419 | -3.9132096315 |
| H | 2.5178756338  | -2.2611583359 | -4.5967649471 |
| H | 2.5405906080  | -6.2353495571 | -2.9357952463 |
| C | 6.5914051426  | -5.4247241549 | 2.3202552769  |
| H | 5.5969368059  | -5.0006533289 | 4.1876617154  |
| H | 7.3619017615  | -5.6647919625 | 0.3185258391  |
| H | 3.9266391111  | 6.1212108503  | 5.0493754860  |
| C | -3.7490302730 | 4.4805283413  | 2.3877655923  |
| H | -4.1411206523 | 6.4842024565  | 1.6878244959  |
| H | -3.1396120026 | 2.4651425436  | 2.8677941587  |
| C | -0.0051655665 | 8.3730374977  | -3.1402041784 |
| H | -1.9300877513 | 7.8201212778  | -3.9459188503 |
| H | 1.9097406292  | 8.6469459444  | -2.1843623059 |
| C | -0.7742317447 | 1.0024013268  | -4.0465990527 |
| H | 1.1342952248  | 1.7199098609  | -4.7530039958 |
| H | -2.7110198457 | 0.5625544971  | -3.1730376568 |
| H | -1.1826380992 | -3.0615562252 | 3.8575131860  |
| H | 2.2996610220  | -4.7244963286 | -4.8982492788 |
| H | 7.3409148004  | -6.0705954393 | 2.7724703416  |

|   |               |              |               |
|---|---------------|--------------|---------------|
| H | -4.5175876184 | 4.5112705872 | 3.1571839196  |
| H | 0.0490546971  | 9.3056764666 | -3.6982586279 |
| H | -0.8688498223 | 0.2396962607 | -4.8343517794 |

(2S,4R)-CYr

0 1

|    |               |               |               |
|----|---------------|---------------|---------------|
| O  | -1.0565345481 | -3.3012194389 | -1.1380848672 |
| C  | -2.2327304779 | -2.9562588158 | -1.1790701662 |
| C  | -2.7727536428 | -1.6344376405 | -0.7508744044 |
| C  | -4.0900131328 | -2.6504966083 | -2.5105370470 |
| C  | -4.1114158774 | -1.4477442890 | -1.5151693843 |
| H  | -2.0317052697 | -0.8484538469 | -0.9692301226 |
| H  | -2.8456490223 | -1.6584995558 | 0.3525357952  |
| H  | -3.5109934242 | -2.3660851842 | -3.4060594010 |
| H  | -5.0892155408 | -2.9458536526 | -2.8517726893 |
| C  | -4.0868154037 | -0.1140597579 | -2.2729769989 |
| H  | -4.9670643652 | 0.0078199072  | -2.9191344557 |
| H  | -4.0686646981 | 0.7296337904  | -1.5649025065 |
| H  | -3.1884045340 | -0.0326224598 | -2.9064228037 |
| C  | -5.3801148088 | -1.5142729970 | -0.6470809736 |
| C  | -5.3697871716 | -1.6350702929 | 0.7444102816  |
| C  | -6.6270645118 | -1.4688962878 | -1.2900207338 |
| C  | -6.5635861471 | -1.7347867469 | 1.4614517913  |
| H  | -4.4363441662 | -1.6787408656 | 1.3069633636  |
| C  | -7.8180827044 | -1.5637947282 | -0.5779463822 |
| H  | -6.6774647123 | -1.3669415414 | -2.3776334785 |
| C  | -7.7913384251 | -1.7046847024 | 0.8090245613  |
| H  | -6.5191828665 | -1.8459998250 | 2.5465730878  |
| H  | -8.7712556030 | -1.5300987363 | -1.1102063585 |
| C  | -3.3420744596 | -3.7959159167 | -1.7847531799 |
| C  | -2.8607427967 | -4.8468408301 | -2.7851034301 |
| H  | -2.1424543982 | -4.4134928932 | -3.4925498177 |
| H  | -3.7200122637 | -5.2369351914 | -3.3444635737 |
| C  | -4.1801539852 | -4.3998524872 | -0.6517900799 |
| C  | -3.6619698342 | -4.5415361036 | 0.6373486638  |
| C  | -5.4942647130 | -4.8088237872 | -0.8995951155 |
| C  | -4.4528376236 | -5.0490393075 | 1.6663705873  |
| H  | -2.6444611980 | -4.2217971355 | 0.8743519845  |
| C  | -6.2813722961 | -5.3235134799 | 0.1241560010  |
| H  | -5.9250379979 | -4.7041488095 | -1.8977292881 |
| C  | -5.7640060269 | -5.4385541429 | 1.4145258714  |
| H  | -4.0374890743 | -5.1201372469 | 2.6729424062  |
| H  | -7.3104601090 | -5.6222234295 | -0.0838036434 |
| Mg | 0.5586202698  | -2.5590476036 | -0.0824621102 |
| O  | 0.3067348791  | 0.6320085834  | 1.5516027175  |
| O  | 0.8287489590  | -0.7151058251 | -0.6307099202 |
| O  | 1.7213632973  | -2.7535538601 | 1.6813168317  |
| C  | 0.7261763366  | -2.4130700784 | 2.3587220347  |
| C  | 0.7365582893  | -1.8295141986 | 3.7456426870  |
| N  | -0.4950693464 | -2.4971800347 | 1.8147117601  |
| C  | -0.7303002996 | -1.4561596902 | 3.9440570563  |
| H  | 1.4246899568  | -0.9738495156 | 3.7465283563  |
| H  | 1.1199847599  | -2.5744096556 | 4.4578687757  |
| C  | -1.4268874811 | -1.9876694249 | 2.6904626180  |
| Br | -1.9965320559 | -6.4030694268 | -2.0040755122 |
| H  | -1.1993019405 | -1.8751890919 | 4.8437639253  |
| H  | -0.8839245849 | -0.3653193481 | 3.9464966457  |
| O  | -2.6247698038 | -1.9591211915 | 2.4983552360  |
| H  | -8.7218623369 | -1.7886713253 | 1.3741454979  |
| H  | -6.3878228521 | -5.8258394657 | 2.2224324545  |



|    |               |               |               |
|----|---------------|---------------|---------------|
| P  | 0.9771370486  | 0.5404632645  | 0.2347085771  |
| O  | 2.5771395519  | 0.8249274606  | 0.4764430196  |
| O  | 0.6097300197  | 1.7416146196  | -0.8254373878 |
| C  | 3.4213285874  | 1.1484776935  | -0.5522159532 |
| C  | 0.9658700284  | 3.0386840231  | -0.5323282596 |
| C  | 3.2986677867  | 2.4002565669  | -1.1277151616 |
| C  | 4.4118713022  | 0.2120066892  | -0.9613501888 |
| C  | 2.3091011209  | 3.3734763749  | -0.5891208056 |
| C  | -0.0448958497 | 3.9937652750  | -0.2202881493 |
| C  | 4.1194436689  | 2.7268158748  | -2.2583192537 |
| C  | 5.2492189561  | 0.5610953192  | -1.9966617895 |
| Si | 4.6014808091  | -1.5067341576 | -0.2048754133 |
| C  | 2.7217730662  | 4.6677620512  | -0.1287815289 |
| C  | 0.3561514355  | 5.2583320994  | 0.1471087218  |
| Si | -1.9044712455 | 3.7091279139  | -0.4243502497 |
| C  | 3.9630486297  | 3.9302339995  | -3.0031017478 |
| C  | 5.1169271061  | 1.8017405689  | -2.6784320445 |
| H  | 6.0355500056  | -0.1214781866 | -2.3447528360 |
| C  | 4.7002940020  | -1.5568797741 | 1.6610836340  |
| C  | 3.2189065484  | -2.5920489055 | -0.8736200993 |
| C  | 6.2155036251  | -2.2243361182 | -0.8556490363 |
| C  | 4.0900266957  | 5.0358384305  | 0.0055262799  |
| C  | 1.7293555661  | 5.6155557124  | 0.2438058191  |
| H  | -0.3776508162 | 6.0381385672  | 0.3903721382  |
| C  | -2.6329504080 | 2.5828275300  | 0.8651130822  |
| C  | -2.7293088307 | 5.3940980311  | -0.2296138560 |
| C  | -2.3337108639 | 3.1078763199  | -2.1540937210 |
| C  | 4.7739504827  | 4.2083373893  | -4.0761484839 |
| H  | 3.1808951278  | 4.6350927906  | -2.7193963457 |
| C  | 5.9489354855  | 2.1242424411  | -3.7855829804 |
| C  | 5.2415069732  | -2.7118445080 | 2.2599007133  |
| C  | 4.2528768241  | -0.5178617484 | 2.4898282850  |
| C  | 2.4721078345  | -2.1898382826 | -1.9973709829 |
| C  | 2.9464820785  | -3.8421922800 | -0.2872889141 |
| C  | 7.4281476448  | -1.8036812067 | -0.2817944061 |
| C  | 6.2502325172  | -3.1520964664 | -1.9076768343 |
| C  | 4.4441668751  | 6.2833165846  | 0.4586353735  |
| H  | 4.8643565957  | 4.3100415110  | -0.2444845778 |
| C  | 2.1267879913  | 6.9024444598  | 0.6980911686  |
| C  | -3.9732847859 | 2.1717714776  | 0.7293994523  |
| C  | -1.9122337361 | 2.1841719172  | 1.9998604967  |
| C  | -2.6572035305 | 6.3388052185  | -1.2684497111 |
| C  | -3.4098274911 | 5.7357374994  | 0.9488443479  |
| C  | -1.4562083337 | 2.3510747544  | -2.9437046188 |
| C  | -3.5974521554 | 3.4355052851  | -2.6811813915 |
| C  | 5.7882797869  | 3.3030552469  | -4.4692326476 |
| H  | 4.6308974463  | 5.1361130809  | -4.6345752257 |
| H  | 6.7177271904  | 1.4077447810  | -4.0875184563 |
| C  | 5.3240115320  | -2.8238370067 | 3.6507631443  |
| H  | 5.6130556595  | -3.5370164264 | 1.6464097911  |
| C  | 4.3347661079  | -0.6299235999 | 3.8842118063  |
| H  | 3.8287467292  | 0.4002595214  | 2.0643037725  |
| C  | 1.4812604195  | -3.0293682020 | -2.5321783670 |
| H  | 2.6432860465  | -1.2137860520 | -2.4665280337 |
| C  | 1.9469972666  | -4.6785284224 | -0.8127542327 |
| H  | 3.4963837420  | -4.1716646361 | 0.6026483177  |
| C  | 8.6481384308  | -2.3008829816 | -0.7516627875 |
| H  | 7.4326271211  | -1.0845990710 | 0.5427615604  |
| C  | 7.4711046212  | -3.6511364918 | -2.3777142742 |
| H  | 5.3256338215  | -3.5002241380 | -2.3738852367 |

|   |               |               |               |
|---|---------------|---------------|---------------|
| C | 3.4544953979  | 7.2348611892  | 0.8009576891  |
| H | 5.5005130816  | 6.5411280793  | 0.5607694295  |
| H | 1.3509570266  | 7.6229440815  | 0.9712409586  |
| C | -4.5750193848 | 1.3732165984  | 1.7042172035  |
| H | -4.5631570405 | 2.4717684236  | -0.1399707556 |
| C | -2.5172770794 | 1.3797321534  | 2.9751718756  |
| H | -0.8623062177 | 2.4688213141  | 2.1366006400  |
| C | -3.2530645240 | 7.5963011156  | -1.1308040810 |
| H | -2.1357904235 | 6.0999234589  | -2.1992534980 |
| C | -4.0070633502 | 6.9949849131  | 1.0876442461  |
| H | -3.4861599910 | 5.0220452789  | 1.7744291452  |
| C | -1.8235454944 | 1.9405527993  | -4.2319460119 |
| H | -0.4663258254 | 2.0648725881  | -2.5674047843 |
| C | -3.9677268449 | 3.0232817482  | -3.9651526989 |
| H | -4.3086393387 | 4.0273200553  | -2.0973412032 |
| H | 6.4306277622  | 3.5398377812  | -5.3198993183 |
| C | 4.8683634198  | -1.7816501224 | 4.4657310717  |
| H | 5.7430312065  | -3.7208796724 | 4.1000436705  |
| H | 3.9831794314  | 0.1868152998  | 4.5112791127  |
| C | 1.2259986333  | -4.2796737986 | -1.9476431000 |
| H | 0.9209193188  | -2.7130344876 | -3.4107890370 |
| H | 1.7523788586  | -5.6490084177 | -0.3562964188 |
| C | 8.6706293225  | -3.2257621450 | -1.8006105887 |
| H | 9.5804388458  | -1.9691129652 | -0.2992879555 |
| H | 7.4850806802  | -4.3718051072 | -3.1924601319 |
| H | 3.7494672422  | 8.2248112816  | 1.1546463254  |
| C | -3.8429919990 | 0.9704249410  | 2.8278450601  |
| H | -5.6073565838 | 1.0499739362  | 1.5844593393  |
| H | -1.9309866884 | 1.0489979580  | 3.8336083223  |
| C | -3.9291816070 | 7.9258327606  | 0.0488105747  |
| H | -3.1920784651 | 8.3185036787  | -1.9417826177 |
| H | -4.5332031490 | 7.2464505043  | 2.0060058845  |
| C | -3.0779975488 | 2.2775206819  | -4.7453441394 |
| H | -1.1240043281 | 1.3651295299  | -4.8337515790 |
| H | -4.9457661877 | 3.2887119806  | -4.3594414193 |
| H | 4.9331578211  | -1.8685560115 | 5.5482139623  |
| H | 0.4702995407  | -4.9411327195 | -2.3768484632 |
| H | 9.6197998420  | -3.6136373589 | -2.1651003534 |
| H | -4.3022174040 | 0.3240073121  | 3.5736924972  |
| H | -4.3935858080 | 8.9038625548  | 0.1557142062  |
| H | -3.3610918692 | 1.9660740754  | -5.7480889187 |

(2S,4S)-CYr

0 1

|   |               |               |               |
|---|---------------|---------------|---------------|
| C | -3.6818128673 | -1.2695854939 | 0.4069723569  |
| C | -4.5239924186 | -1.9844328776 | 1.3755205526  |
| C | -5.7719954413 | -1.1260294796 | 1.6271351729  |
| H | -4.6375794502 | -3.0573837094 | 1.1791018887  |
| H | -3.8621463304 | -1.9138489937 | 2.2948425225  |
| C | -4.2310224956 | 0.1265094102  | 0.1394366963  |
| C | -3.1302881747 | 1.1841174744  | 0.0169613552  |
| H | -2.4846741243 | 0.9768992665  | -0.8461717701 |
| H | -3.5808690514 | 2.1748532024  | -0.1229706028 |
| O | -0.8312552268 | -2.5834153907 | 2.4508685600  |
| C | -1.2588785204 | -1.9463031360 | 3.4673079104  |
| C | -0.3159053452 | -1.4353149728 | 4.5332644698  |
| N | -2.5201486797 | -1.6397839486 | 3.6597554356  |
| C | -1.2549979546 | -0.6638474620 | 5.4515973156  |
| H | 0.1997047659  | -2.2834312373 | 5.0075276032  |
| H | 0.4420765205  | -0.8157476665 | 4.0298289356  |

|    |                |               |               |
|----|----------------|---------------|---------------|
| C  | -2.6323761286  | -0.8654683310 | 4.8051389452  |
| Br | -1.9295126970  | 1.3310702140  | 1.5404339049  |
| H  | -1.0374009968  | 0.4184404762  | 5.4788398139  |
| H  | -1.2832109823  | -1.0210599383 | 6.4902022481  |
| O  | -3.6684598290  | -0.4009005974 | 5.2235089236  |
| O  | -2.6108101847  | -1.6834327733 | -0.0522730001 |
| C  | -5.1780144004  | 0.2835939157  | 1.3484717952  |
| H  | -4.5725655191  | 0.5755707802  | 2.2216246397  |
| H  | -5.9411858998  | 1.0588096836  | 1.2129182015  |
| C  | -6.2335917578  | -1.2600544760 | 3.0851026598  |
| H  | -6.6023197595  | -2.2790925059 | 3.2749429701  |
| H  | -7.0512635549  | -0.5612640177 | 3.3115281037  |
| H  | -5.4068052547  | -1.0457277369 | 3.7805439206  |
| C  | -6.9303170497  | -1.4242679948 | 0.6661707639  |
| C  | -6.8437972319  | -2.3523376227 | -0.3755241818 |
| C  | -8.1239134051  | -0.6981912009 | 0.7884731267  |
| C  | -7.8932961681  | -2.5317464403 | -1.2771034864 |
| H  | -5.9332133831  | -2.9345604877 | -0.5219404837 |
| C  | -9.1766850326  | -0.8749405666 | -0.1035386820 |
| H  | -8.2286347570  | 0.0389126023  | 1.5882647993  |
| C  | -9.0643524413  | -1.7921273309 | -1.1482811001 |
| H  | -7.7863004163  | -3.2522110194 | -2.0906351801 |
| H  | -10.0906420439 | -0.2887718958 | 0.0156109267  |
| H  | -9.8850774763  | -1.9282584860 | -1.8553100295 |
| C  | -4.9453261671  | 0.1101315763  | -1.2325010452 |
| C  | -4.3970749810  | -0.5894306851 | -2.3141159681 |
| C  | -6.1207982270  | 0.8383260466  | -1.4433350289 |
| C  | -5.0296948093  | -0.5992264374 | -3.5559523388 |
| H  | -3.4635617172  | -1.1396180681 | -2.1898421117 |
| C  | -6.7540118452  | 0.8291999645  | -2.6821590590 |
| H  | -6.5720525476  | 1.4056108289  | -0.6303713629 |
| C  | -6.2172696637  | 0.1018058907  | -3.7426208564 |
| H  | -4.5884821436  | -1.1616331767 | -4.3808844780 |
| H  | -7.6811428011  | 1.3899225570  | -2.8138233989 |
| H  | -6.7206812051  | 0.0870984001  | -4.7109602050 |
| Mg | -0.7485627382  | -2.1238187687 | 0.5963493199  |
| O  | 0.6898426640   | -1.0025573553 | 0.0293663984  |
| P  | 1.5661451332   | -0.0560765823 | 0.8573232732  |
| O  | 1.1731771275   | 0.3277316425  | 2.2317248277  |
| O  | 3.0757486262   | -0.6926212130 | 0.9311438007  |
| O  | 1.8125115881   | 1.1928355051  | -0.1715985668 |
| C  | 3.8258007989   | -0.8298552239 | -0.2072285700 |
| C  | 2.8367209847   | 2.0725776706  | 0.0930187534  |
| C  | 4.3620490137   | 0.3117515853  | -0.7752759200 |
| C  | 4.0309852364   | -2.1308677172 | -0.7418215235 |
| C  | 4.1330584354   | 1.6353070319  | -0.1286809006 |
| C  | 2.5334243746   | 3.3843356459  | 0.5581934507  |
| C  | 5.0881742183   | 0.1899779734  | -2.0059115150 |
| C  | 4.7867335156   | -2.2489417710 | -1.8865564258 |
| Si | 3.2895845022   | -3.6798288406 | 0.0415137001  |
| C  | 5.2238822421   | 2.4695694867  | 0.2816728973  |
| C  | 3.5910830092   | 4.2024371350  | 0.8870589344  |
| Si | 0.8142525331   | 4.1781085654  | 0.6244890584  |
| C  | 5.5682326718   | 1.3169798998  | -2.7316230849 |
| C  | 5.3171059950   | -1.1074841808 | -2.5487754891 |
| H  | 4.9871672340   | -3.2298860681 | -2.3363955165 |
| C  | 3.6716404074   | -3.9194941131 | 1.8542558389  |
| C  | 1.4259548698   | -3.7397591791 | -0.2434941197 |
| C  | 4.0041083922   | -5.1526876645 | -0.8859314155 |
| C  | 6.5804646093   | 2.0425118510  | 0.2318219487  |

|   |               |               |               |
|---|---------------|---------------|---------------|
| C | 4.9421319117  | 3.7660333961  | 0.7953457698  |
| H | 3.4241742329  | 5.2283948293  | 1.2411153213  |
| C | -0.0753319343 | 3.9561529961  | 2.2553511114  |
| C | 1.1161421946  | 6.0234586242  | 0.3676947605  |
| C | -0.3375313572 | 3.6595893582  | -0.7685809397 |
| C | 6.2648650291  | 1.1584452168  | -3.9044716055 |
| H | 5.3721616093  | 2.3191461056  | -2.3489065328 |
| C | 6.0518821998  | -1.2381739121 | -3.7594343590 |
| C | 3.6154926342  | -5.2298382135 | 2.3706189107  |
| C | 3.9939784866  | -2.8676161638 | 2.7231569637  |
| C | 0.8677660457  | -3.1463680811 | -1.3938907142 |
| C | 0.5891098092  | -4.4702058754 | 0.6172257455  |
| C | 5.3238614322  | -5.5472116674 | -0.6011004788 |
| C | 3.2818465516  | -5.8600358114 | -1.8583752030 |
| C | 7.5962600609  | 2.8705194823  | 0.6435116785  |
| H | 6.8105308424  | 1.0396030836  | -0.1291262891 |
| C | 6.0160628228  | 4.6032533185  | 1.2032298941  |
| C | -1.1270693397 | 4.8372357079  | 2.5725948117  |
| C | 0.1883508508  | 2.8852484459  | 3.1222281986  |
| C | 1.2184315103  | 6.5376183467  | -0.9352360680 |
| C | 1.2669263300  | 6.9001866089  | 1.4545696604  |
| C | -0.0225740659 | 2.7273149768  | -1.7658598171 |
| C | -1.5968931679 | 4.2901642512  | -0.8151520437 |
| C | 6.5220349445  | -0.1331194833 | -4.4230384067 |
| H | 6.6202343438  | 2.0388034797  | -4.4446113141 |
| H | 6.2294942902  | -2.2411157841 | -4.1570531431 |
| C | 3.8695493616  | -5.4758747808 | 3.7221838641  |
| H | 3.3801161777  | -6.0768460521 | 1.7199678343  |
| C | 4.2486615894  | -3.1143347119 | 4.0791269682  |
| H | 4.0496490136  | -1.8325606177 | 2.3619414516  |
| C | -0.4919885060 | -3.3172687944 | -1.6987949352 |
| H | 1.4862562285  | -2.5311882037 | -2.0582464660 |
| C | -0.7735013986 | -4.6517349122 | 0.3134486476  |
| H | 0.9829607661  | -4.9139173303 | 1.5400394368  |
| C | 5.9062101880  | -6.6246019688 | -1.2761293367 |
| H | 5.9111630367  | -5.0184524113 | 0.1559716248  |
| C | 3.8641381872  | -6.9395105697 | -2.5342105874 |
| H | 2.2541213601  | -5.5822229648 | -2.1016536079 |
| C | 7.3164374236  | 4.1706172936  | 1.1268059919  |
| H | 8.6297179699  | 2.5197561997  | 0.6023435306  |
| H | 5.7846119888  | 5.6009496338  | 1.5860648142  |
| C | -1.9154933432 | 4.6315677027  | 3.7088400860  |
| H | -1.3465001923 | 5.6972221963  | 1.9344678765  |
| C | -0.6179935666 | 2.6652766956  | 4.2461340337  |
| H | 1.0236956307  | 2.1942301070  | 2.9346199818  |
| C | 1.4636908907  | 7.8993585026  | -1.1469524328 |
| H | 1.1044836374  | 5.8814469749  | -1.8025193030 |
| C | 1.5112373989  | 8.2616451525  | 1.2440259824  |
| H | 1.1921382871  | 6.5304914182  | 2.4807962321  |
| C | -0.9417666287 | 2.4212406834  | -2.7790288201 |
| H | 0.9452310440  | 2.2140875290  | -1.7708951990 |
| C | -2.5122533506 | 3.9922992394  | -1.8288789562 |
| H | -1.8801912537 | 5.0262592679  | -0.0570172714 |
| H | 7.0830931568  | -0.2451604676 | -5.3530637242 |
| C | 4.1857934800  | -4.4157143313 | 4.5798643513  |
| H | 3.8233749159  | -6.4913055735 | 4.1089847474  |
| H | 4.4926638216  | -2.2845446254 | 4.7403023227  |
| C | -1.3131720580 | -4.0900286375 | -0.8563247447 |
| H | -0.9073822784 | -2.8700498057 | -2.6024663891 |
| H | -1.4020400703 | -5.2467887301 | 0.9793530079  |

|   |               |               |               |
|---|---------------|---------------|---------------|
| C | 5.1762570893  | -7.3222691804 | -2.2441614363 |
| H | 6.9275945928  | -6.9218879091 | -1.0465142383 |
| H | 3.2929623214  | -7.4814108846 | -3.2850382442 |
| H | 8.1334395006  | 4.8207142305  | 1.4461100034  |
| C | -1.6706780642 | 3.5343700948  | 4.5411275643  |
| H | -2.7252935783 | 5.3186516011  | 3.9410614082  |
| H | -0.4241493999 | 1.8017623362  | 4.8898201643  |
| C | 1.6099448735  | 8.7628257790  | -0.0575680781 |
| H | 1.5394468090  | 8.2855011339  | -2.1610677581 |
| H | 1.6228722870  | 8.9309958869  | 2.0941721324  |
| C | -2.1858112765 | 3.0535098306  | -2.8137476850 |
| H | -0.6786371282 | 1.6915215400  | -3.5411299108 |
| H | -3.4757823180 | 4.4952021495  | -1.8564756973 |
| H | 4.3823538171  | -4.6071935382 | 5.6331093289  |
| H | -2.3575390430 | -4.2646412269 | -1.1200795293 |
| H | 5.6291883227  | -8.1616848832 | -2.7684484220 |
| H | -2.3010503815 | 3.3562759326  | 5.4106265582  |
| H | 1.7992539308  | 9.8215003894  | -0.2216866587 |
| H | -2.8979451325 | 2.8204960363  | -3.6024643081 |

(2S,5R)-EPr

0 1

|    |               |               |               |
|----|---------------|---------------|---------------|
| O  | -0.6950646953 | 2.7709592945  | 0.9855101077  |
| C  | -0.5794381907 | 3.9543378577  | 0.2060079531  |
| C  | -1.2088459163 | 5.2867437645  | 0.5381270137  |
| C  | -0.8880200013 | 4.1385319485  | -1.2648762364 |
| C  | -0.9461618383 | 5.6664318949  | -0.9595528924 |
| H  | -2.2843063116 | 5.1658938748  | 0.7330772264  |
| H  | -0.7439977441 | 5.8874619343  | 1.3297513783  |
| H  | -1.9028553206 | 3.7818440440  | -1.4839657113 |
| H  | -0.1900047642 | 3.7359452466  | -2.0087177465 |
| C  | 0.6227715855  | 3.3605271911  | 0.8147772266  |
| C  | 1.5806446961  | 2.6078156637  | -0.0748077483 |
| H  | 1.0627377868  | 1.9818953220  | -0.8119216468 |
| H  | 2.2006316296  | 3.3424558640  | -0.6046213638 |
| Mg | -1.5411046645 | 0.9024054481  | 0.6363858286  |
| O  | -0.3041534786 | -0.1807413082 | 1.6242343762  |
| O  | 1.1100471959  | -2.1283708731 | 2.6794208047  |
| O  | -3.2724900036 | 1.5309241845  | -0.6148212418 |
| C  | -2.5599368499 | 1.3241718348  | -1.6238990683 |
| C  | -2.9618473817 | 1.5244975938  | -3.0674804777 |
| N  | -1.2967397792 | 0.9268341346  | -1.4774664994 |
| C  | -1.6918008501 | 1.1250398070  | -3.8153279925 |
| H  | -3.8380976771 | 0.9026185144  | -3.2953739479 |
| H  | -3.2604327910 | 2.5729920658  | -3.2175194113 |
| C  | -0.6633339124 | 0.8768932745  | -2.7055439235 |
| Br | 2.7989484514  | 1.4563209507  | 0.8883544414  |
| H  | -1.3093075934 | 1.8877898271  | -4.5065232585 |
| H  | -1.8105396816 | 0.1922418469  | -4.3849496673 |
| O  | 0.5206543923  | 0.7098884172  | -2.8741485149 |
| C  | 1.1923614657  | 4.0045408549  | 2.0411244665  |
| C  | 1.9940073480  | 5.1407164592  | 1.8963659409  |
| C  | 0.9666115843  | 3.4684440651  | 3.3078221996  |
| C  | 2.5471848798  | 5.7492516146  | 3.0201536631  |
| H  | 2.1845664270  | 5.5540829930  | 0.9026554819  |
| C  | 1.5227311496  | 4.0792580219  | 4.4301726765  |
| H  | 0.3740821306  | 2.5558948978  | 3.4043573748  |
| C  | 2.3089856003  | 5.2217826911  | 4.2890411597  |
| H  | 3.1686110026  | 6.6389460126  | 2.9006606365  |
| H  | 1.3509754897  | 3.6519274022  | 5.4192890849  |

|    |               |               |               |
|----|---------------|---------------|---------------|
| H  | 2.7451552620  | 5.6976144483  | 5.1695292818  |
| C  | -2.0503438546 | 6.4381548339  | -1.6757829721 |
| H  | -1.8330225916 | 6.5085945696  | -2.7523524052 |
| H  | -2.1363782380 | 7.4620959906  | -1.2833189331 |
| H  | -3.0228492859 | 5.9385018817  | -1.5489691230 |
| C  | 0.3964986958  | 6.3768638062  | -1.0960233446 |
| C  | 0.6090077616  | 7.5637997570  | -0.3803269685 |
| C  | 1.4365541036  | 5.8998039788  | -1.8987493185 |
| C  | 1.8252274783  | 8.2361180362  | -0.4420727886 |
| H  | -0.1872164275 | 7.9602400251  | 0.2549953122  |
| C  | 2.6621779153  | 6.5668136241  | -1.9591953774 |
| H  | 1.3087721095  | 4.9887953093  | -2.4855205601 |
| C  | 2.8638579806  | 7.7330647422  | -1.2268282888 |
| H  | 1.9675470581  | 9.1529233976  | 0.1337170260  |
| H  | 3.4636258187  | 6.1643850228  | -2.5823359680 |
| H  | 3.8243443085  | 8.2502920961  | -1.2682491655 |
| P  | 0.3582665886  | -1.5579164747 | 1.5510236298  |
| O  | 1.1534493120  | -1.5236800015 | 0.1073167968  |
| O  | -0.8671330763 | -2.6101232941 | 1.1619991637  |
| C  | 1.4488981686  | -2.7025882212 | -0.5263111559 |
| C  | -1.5537649082 | -2.4032512880 | 0.0038935532  |
| C  | 0.4092461428  | -3.3832998275 | -1.1432111208 |
| C  | 2.7930222818  | -3.1793425130 | -0.5540353387 |
| C  | -0.9438378547 | -2.7656925237 | -1.1861703496 |
| C  | -2.8586069173 | -1.8291738436 | 0.0517646808  |
| C  | 0.6512181766  | -4.6829842433 | -1.6963420073 |
| C  | 3.0267434184  | -4.3987939550 | -1.1482051706 |
| Si | 4.3170045114  | -2.1557694733 | -0.0887790139 |
| C  | -1.6320693379 | -2.5255927270 | -2.4168118770 |
| C  | -3.5559585289 | -1.6988527381 | -1.1322454223 |
| Si | -3.7016325557 | -1.2796857341 | 1.6533670069  |
| C  | -0.3856107051 | -5.5117470051 | -2.2107746161 |
| C  | 1.9795232553  | -5.1905161349 | -1.6954767273 |
| H  | 4.0412862849  | -4.8122550331 | -1.2146438561 |
| C  | 4.5387359035  | -0.8552566034 | -1.4207929046 |
| C  | 4.3215326127  | -1.3080860494 | 1.5767102766  |
| C  | 5.7957908099  | -3.3268140175 | -0.1022893762 |
| C  | -1.0312128096 | -2.7461015715 | -3.6894432858 |
| C  | -2.9711155077 | -2.0399692684 | -2.3795347190 |
| H  | -4.5758318373 | -1.2964052893 | -1.1519006927 |
| C  | -5.5147999370 | -0.9981490165 | 1.2171674873  |
| C  | -3.6394639788 | -2.5802030062 | 2.9993602473  |
| C  | -3.0155755020 | 0.3036775849  | 2.4285685391  |
| C  | -0.1076215707 | -6.7552752729 | -2.7243143960 |
| H  | -1.4165236571 | -5.1575091705 | -2.1844764337 |
| C  | 2.2370600335  | -6.4767452511 | -2.2423520382 |
| C  | 5.8169977039  | -0.4691268333 | -1.8609531494 |
| C  | 3.4139176915  | -0.2128594149 | -1.9625944169 |
| C  | 3.7150097571  | -1.8656977182 | 2.7102200027  |
| C  | 5.0094206994  | -0.0840750570 | 1.7043094897  |
| C  | 6.4177725432  | -3.6891943560 | -1.3100930986 |
| C  | 6.2918259951  | -3.8602822766 | 1.0973762160  |
| C  | -1.7465236728 | -2.5680825386 | -4.8474739363 |
| H  | 0.0124961893  | -3.0574257241 | -3.7349181627 |
| C  | -3.6935832237 | -1.8871852839 | -3.5968660930 |
| C  | -5.9520915992 | 0.1442217069  | 0.5253276094  |
| C  | -6.4617503747 | -1.9812780814 | 1.5495673468  |
| C  | -4.3908529837 | -2.3352226892 | 4.1671561040  |
| C  | -2.9020604585 | -3.7679302275 | 2.9095637329  |
| C  | -3.5079202867 | 1.6005597635  | 2.1521871922  |

|   |               |               |               |
|---|---------------|---------------|---------------|
| C | -2.1090320328 | 0.1585662887  | 3.5080080923  |
| C | 1.2195791956  | -7.2442995727 | -2.7521490617 |
| H | -0.9207122678 | -7.3750674682 | -3.1084705254 |
| H | 3.2655903015  | -6.8475809102 | -2.2424468587 |
| C | 5.9671910401  | 0.5204486803  | -2.8373877833 |
| H | 6.7128398403  | -0.9350609488 | -1.4440978792 |
| C | 3.5652170033  | 0.7743246994  | -2.9453887269 |
| H | 2.3951197931  | -0.4591736365 | -1.6269717664 |
| C | 3.7469384978  | -1.1887173724 | 3.9383020921  |
| H | 3.1820968785  | -2.8238029973 | 2.6564280115  |
| C | 5.0330589407  | 0.5927868593  | 2.9281240294  |
| H | 5.5452639517  | 0.3475327043  | 0.8522741764  |
| C | 7.5105941618  | -4.5616233275 | -1.3171845708 |
| H | 6.0547929978  | -3.2913808043 | -2.2617419654 |
| C | 7.3850932394  | -4.7357895760 | 1.0914985869  |
| H | 5.8344340679  | -3.5977332905 | 2.0555512322  |
| C | -3.1017384246 | -2.1541407890 | -4.8054037124 |
| H | -1.2650509956 | -2.7438048353 | -5.8116009603 |
| H | -4.7326363483 | -1.5491553966 | -3.5492361737 |
| C | -7.2981976430 | 0.3089068711  | 0.1871109494  |
| H | -5.2349883171 | 0.9283277753  | 0.2382984195  |
| C | -7.8110160845 | -1.8197485434 | 1.2107305627  |
| H | -6.1623540099 | -2.8917622899 | 2.0781827143  |
| C | -4.4056518917 | -3.2609870245 | 5.2124768681  |
| H | -4.9731813762 | -1.4152644342 | 4.2712173327  |
| C | -2.9152759261 | -4.6965587424 | 3.9601694565  |
| H | -2.2889680299 | -3.9863039131 | 2.0267049808  |
| C | -3.1205767147 | 2.7018437617  | 2.9272527542  |
| H | -4.2493985273 | 1.7598419851  | 1.3487270626  |
| C | -1.7362191272 | 1.2581552913  | 4.2864008032  |
| H | -1.7023224269 | -0.8275429805 | 3.7706005291  |
| H | 1.4280940935  | -8.2324015176 | -3.1670470458 |
| C | 4.8384863337  | 1.1400037116  | -3.3854440826 |
| H | 6.9605287973  | 0.8077314507  | -3.1710559180 |
| H | 2.6742888650  | 1.2439985393  | -3.3638305858 |
| C | 4.3958249427  | 0.0417638950  | 4.0466389152  |
| H | 3.2363347366  | -1.6224338841 | 4.7965564433  |
| H | 5.5479911408  | 1.5468469501  | 3.0110539557  |
| C | 7.9958714705  | -5.0867141196 | -0.1148698344 |
| H | 7.9846619534  | -4.8310879796 | -2.2580751106 |
| H | 7.7588230448  | -5.1409791609 | 2.0292784688  |
| H | -3.6639942250 | -2.0352768697 | -5.7336433188 |
| C | -8.2318960883 | -0.6740516047 | 0.5314464563  |
| H | -7.6201986330 | 1.2020315594  | -0.3433092218 |
| H | -8.5317309493 | -2.5900000616 | 1.4781859760  |
| C | -3.6659402406 | -4.4456903922 | 5.1092788894  |
| H | -4.9885349978 | -3.0620348517 | 6.1085926437  |
| H | -2.3285410331 | -5.6098714851 | 3.8777123244  |
| C | -2.2429369835 | 2.5299951305  | 3.9995755579  |
| H | -3.5153787170 | 3.6891916524  | 2.6979353316  |
| H | -1.0433700760 | 1.1183345648  | 5.1161524262  |
| H | 4.9549309092  | 1.9028907442  | -4.1508138641 |
| H | 4.4058128141  | 0.5740372385  | 4.9945557056  |
| H | 8.8461782089  | -5.7650091577 | -0.1198181198 |
| H | -9.2805474122 | -0.5469921899 | 0.2706616625  |
| H | -3.6743632582 | -5.1654332462 | 5.9255231222  |
| H | -1.9512470626 | 3.3844015136  | 4.6101255978  |

(2S,5S)-EPr

0 1

|    |               |               |               |
|----|---------------|---------------|---------------|
| O  | -1.8125134809 | 1.6107974218  | 0.4427158059  |
| C  | -2.8747020360 | 2.3977099147  | -0.0870006982 |
| C  | -3.2097275356 | 2.6005154346  | -1.5464841624 |
| C  | -4.3469956523 | 2.3691038076  | 0.2650701813  |
| C  | -4.5519986745 | 3.2041232917  | -1.0415975642 |
| H  | -3.3778150358 | 1.6258917363  | -2.0312657761 |
| H  | -2.5360660755 | 3.1935854424  | -2.1710292519 |
| H  | -4.7532133565 | 1.3544164215  | 0.1304030693  |
| H  | -4.6785338657 | 2.7865454456  | 1.2243212363  |
| C  | -1.7795128521 | 3.0520676864  | 0.6590409283  |
| C  | -1.9821639866 | 3.3605805201  | 2.1211555456  |
| H  | -2.8790305122 | 2.8636831225  | 2.5071387399  |
| H  | -2.0500327859 | 4.4333806303  | 2.3241517533  |
| Mg | -0.3488068125 | 0.2621981689  | 1.3229248007  |
| O  | 0.8399213795  | 0.6571784719  | -0.2332282244 |
| O  | -0.4511350857 | 0.0195622727  | -2.4580172330 |
| O  | 0.6292038280  | -0.7710228846 | 2.6641070767  |
| C  | 1.4493790097  | -0.4091995870 | 3.5674519361  |
| C  | 2.3027759833  | -1.4234226699 | 4.3008503734  |
| N  | 1.6189615137  | 0.8308470993  | 3.9562996539  |
| C  | 3.1484068507  | -0.5391467389 | 5.2058980909  |
| H  | 2.8736918076  | -2.0163982148 | 3.5746451009  |
| H  | 1.6486932351  | -2.1268343900 | 4.8375426361  |
| C  | 2.5870601795  | 0.8723092833  | 4.9564143114  |
| Br | -0.4635177591 | 2.6105290407  | 3.1037006992  |
| H  | 3.0807696742  | -0.7768850674 | 6.2766428873  |
| H  | 4.2165956428  | -0.5430288567 | 4.9408502065  |
| O  | 2.9395962745  | 1.8652180948  | 5.5418826822  |
| C  | -0.7411026758 | 3.8358305383  | -0.0926693955 |
| C  | -0.3911891650 | 5.1252249671  | 0.3240414322  |
| C  | -0.1794930222 | 3.3313814991  | -1.2706904651 |
| C  | 0.4938801430  | 5.8975799954  | -0.4237997054 |
| H  | -0.8097632381 | 5.5549810143  | 1.2338422254  |
| C  | 0.7051158222  | 4.1052641033  | -2.0157984623 |
| H  | -0.4173425220 | 2.3243995778  | -1.6119164194 |
| C  | 1.0440305592  | 5.3907819332  | -1.5987069864 |
| H  | 0.7562404539  | 6.8995244203  | -0.0795675587 |
| H  | 1.1379048475  | 3.6838400937  | -2.9262501019 |
| H  | 1.7431634030  | 5.9929407138  | -2.1821376546 |
| C  | -5.7878727894 | 2.8877545598  | -1.8746216139 |
| H  | -6.7082102496 | 3.1978895649  | -1.3590320714 |
| H  | -5.7440917680 | 3.4170749346  | -2.8373865362 |
| H  | -5.8506479585 | 1.8063172812  | -2.0781302493 |
| C  | -4.4650474507 | 4.6972488224  | -0.7243130583 |
| C  | -3.5038544659 | 5.5453141055  | -1.2816303841 |
| C  | -5.3943050029 | 5.2534163805  | 0.1678323648  |
| C  | -3.4633240397 | 6.9007857881  | -0.9500756412 |
| H  | -2.7543567239 | 5.1579152642  | -1.9725812337 |
| C  | -5.3611441512 | 6.6047904541  | 0.4976683354  |
| H  | -6.1600608221 | 4.6145638125  | 0.6168836007  |
| C  | -4.3888406172 | 7.4362414501  | -0.0598845704 |
| H  | -2.6915340160 | 7.5353321035  | -1.3905583357 |
| H  | -6.0957888444 | 7.0111815354  | 1.1960245159  |
| H  | -4.3547493593 | 8.4958791897  | 0.2009059890  |
| P  | 0.3991974877  | -0.3303998393 | -1.3036644983 |
| O  | 1.6120226692  | -1.3006431599 | -1.7519347446 |
| O  | -0.4301440802 | -1.3831381903 | -0.2129656465 |
| C  | 2.4211749604  | -1.8040410356 | -0.7532127954 |
| C  | -0.5216848616 | -2.7471790252 | -0.4208058263 |
| C  | 1.9494024775  | -2.8950487816 | -0.0548493071 |



|    |               |               |               |
|----|---------------|---------------|---------------|
| C  | 3.6654573607  | -1.1794333759 | -0.4847223808 |
| C  | 0.6414498548  | -3.5011811582 | -0.4297326747 |
| C  | -1.8085024987 | -3.3355378693 | -0.5823555996 |
| C  | 2.7313628499  | -3.4018219413 | 1.0355680107  |
| C  | 4.4445985809  | -1.7145595766 | 0.5131179368  |
| Si | 4.3210171445  | 0.3732335475  | -1.3470476123 |
| C  | 0.5627459928  | -4.8815255017 | -0.8153187715 |
| C  | -1.8805237612 | -4.6798321363 | -0.8695097265 |
| Si | -3.4386644149 | -2.4555387214 | -0.2327911994 |
| C  | 2.2796316049  | -4.4425383440 | 1.8936063505  |
| C  | 4.0081601308  | -2.8246505916 | 1.2899131865  |
| H  | 5.4238120471  | -1.2828923893 | 0.7544813281  |
| C  | 3.4651786028  | 0.8251554584  | -2.9486542770 |
| C  | 4.2591690404  | 1.7974712784  | -0.1395628516 |
| C  | 6.1142432214  | -0.0186475503 | -1.7667341296 |
| C  | 1.7206052973  | -5.6845177771 | -1.0174840172 |
| C  | -0.7125542716 | -5.4715520060 | -1.0363695697 |
| H  | -2.8485228403 | -5.1843254703 | -0.9842959944 |
| C  | -4.1088126872 | -1.5026353772 | -1.6926968626 |
| C  | -4.6918045897 | -3.7802159437 | 0.2331276342  |
| C  | -3.2820752888 | -1.3389465183 | 1.2789331802  |
| C  | 3.0731718745  | -4.9138017583 | 2.9115584195  |
| H  | 1.2867414230  | -4.8657003732 | 1.7410573186  |
| C  | 4.8114966864  | -3.3440431359 | 2.3417445849  |
| C  | 3.4051425889  | 2.1760324229  | -3.3314463452 |
| C  | 2.9596266250  | -0.1487355735 | -3.8259598429 |
| C  | 3.3061784348  | 1.8355076682  | 0.8897453888  |
| C  | 5.1746118418  | 2.8606872673  | -0.2576805251 |
| C  | 6.4403375376  | -0.5989124285 | -3.0032887478 |
| C  | 7.1458501001  | 0.2304035096  | -0.8456036362 |
| C  | 1.6096604315  | -7.0015434043 | -1.3904107080 |
| H  | 2.7074057607  | -5.2397461925 | -0.8848616376 |
| C  | -0.7957479577 | -6.8408561161 | -1.4096410381 |
| C  | -5.4948695684 | -1.2718951531 | -1.7963884355 |
| C  | -3.2703059437 | -1.0390388745 | -2.7158731152 |
| C  | -4.8389270887 | -4.1791024957 | 1.5713789276  |
| C  | -5.4717357853 | -4.4119516189 | -0.7507009969 |
| C  | -2.1423580815 | -1.3204658159 | 2.1108413892  |
| C  | -4.3860114431 | -0.5543476213 | 1.6358783250  |
| C  | 4.3610305946  | -4.3720127891 | 3.1324969899  |
| H  | 2.7037850649  | -5.7112058894 | 3.5595416430  |
| H  | 5.7940797945  | -2.8985756531 | 2.5172760006  |
| C  | 2.8617468408  | 2.5433609515  | -4.5682446394 |
| H  | 3.7785141175  | 2.9610189372  | -2.6672340335 |
| C  | 2.4010448004  | 0.2192363781  | -5.0548831184 |
| H  | 2.9764219014  | -1.2091579332 | -3.5520273508 |
| C  | 3.2839725710  | 2.9009822331  | 1.7997132140  |
| H  | 2.5544857835  | 1.0410009770  | 0.9961619365  |
| C  | 5.1471599252  | 3.9264837047  | 0.6450640615  |
| H  | 5.9215979801  | 2.8652307224  | -1.0549246627 |
| C  | 7.7665541991  | -0.9248028094 | -3.3116112642 |
| H  | 5.6642388214  | -0.8010019600 | -3.7461489221 |
| C  | 8.4715465070  | -0.0938473745 | -1.1528770057 |
| H  | 6.9283328461  | 0.6886041567  | 0.1228882249  |
| C  | 0.3384947036  | -7.5938855504 | -1.5801347567 |
| H  | 2.5121674591  | -7.5961119110 | -1.5470810195 |
| H  | -1.7839163223 | -7.2817738305 | -1.5648663673 |
| C  | -6.0269901334 | -0.6065055028 | -2.9031281498 |
| H  | -6.1777932380 | -1.6232559533 | -1.0187118921 |
| C  | -3.8035635035 | -0.3605665075 | -3.8216301100 |

|   |               |               |               |
|---|---------------|---------------|---------------|
| H | -2.1802988687 | -1.1855233010 | -2.6788137890 |
| C | -5.7496913497 | -5.1835962497 | 1.9199790590  |
| H | -4.2453964096 | -3.7116449536 | 2.3615357028  |
| C | -6.3820222338 | -5.4154460317 | -0.4032222939 |
| H | -5.3792469355 | -4.1260622931 | -1.8023464856 |
| C | -2.0934678998 | -0.4708563226 | 3.2262318804  |
| H | -1.3210036369 | -2.0483025366 | 1.9549342916  |
| C | -4.3431841326 | 0.2827147316  | 2.7629234927  |
| H | -5.3075630671 | -0.5881721384 | 1.0464483196  |
| H | 4.9843907066  | -4.7598159243 | 3.9402855926  |
| C | 2.3559716929  | 1.5653191113  | -5.4293078625 |
| H | 2.8348138815  | 3.5901750478  | -4.8602727537 |
| H | 1.9924214524  | -0.5437848582 | -5.7138003026 |
| C | 4.2037540655  | 3.9437137018  | 1.6797975827  |
| H | 2.5480460775  | 2.9058078744  | 2.6079470422  |
| H | 5.8599451378  | 4.7410179450  | 0.5477492561  |
| C | 8.7835158217  | -0.6730726404 | -2.3867863663 |
| H | 8.0048072551  | -1.3730775278 | -4.2736064923 |
| H | 9.2607792430  | 0.1070014591  | -0.4319348090 |
| H | 0.2649297045  | -8.6436797907 | -1.8707022688 |
| C | -5.1788986037 | -0.1493734720 | -3.9201272394 |
| H | -7.1004478544 | -0.4510972318 | -2.9816499558 |
| H | -3.1310469418 | -0.0038334081 | -4.6019380615 |
| C | -6.5224233784 | -5.8020924122 | 0.9334461206  |
| H | -5.8548599261 | -5.4831305159 | 2.9608454879  |
| H | -6.9819303800 | -5.8955735811 | -1.1737479718 |
| C | -3.1924140469 | 0.3420122531  | 3.5445053779  |
| H | -1.2292129701 | -0.4916072614 | 3.9036586230  |
| H | -5.2170507779 | 0.8749644004  | 3.0291314667  |
| H | 1.9247904147  | 1.8506341207  | -6.3864609551 |
| H | 4.1884923559  | 4.7672647759  | 2.3910939235  |
| H | 9.8142628145  | -0.9252196754 | -2.6262210926 |
| H | -5.5936874693 | 0.3652956176  | -4.7848496585 |
| H | -7.2310120375 | -6.5827549637 | 1.2040787272  |
| H | -3.1440807603 | 0.9941246738  | 4.4165107114  |

ECr

0 1

|    |               |               |               |
|----|---------------|---------------|---------------|
| O  | -2.1867530339 | 1.3223010795  | 0.9396434406  |
| C  | -2.6656458197 | 2.4715672201  | 0.3933827916  |
| C  | -2.6012878950 | 2.6120500501  | -1.1560934505 |
| C  | -4.2123130701 | 2.6079422720  | 0.2441995632  |
| C  | -4.0133342330 | 3.2529826883  | -1.1504431019 |
| H  | -2.6276081011 | 1.6020422481  | -1.5923964829 |
| H  | -1.7738421271 | 3.1648917248  | -1.6166321665 |
| H  | -4.6290068604 | 1.5972898270  | 0.1267256675  |
| H  | -4.7815033286 | 3.1431109719  | 1.0162995798  |
| C  | -2.0867896104 | 3.6921170290  | 1.1576196449  |
| C  | -2.5269965076 | 3.9769543080  | 2.3988470315  |
| H  | -3.3463435214 | 3.4094374457  | 2.8475065116  |
| H  | -2.1200472908 | 4.8161068985  | 2.9710854686  |
| Mg | -0.8709123384 | 0.0310020889  | 1.0457971093  |
| O  | 0.5045649284  | 0.4845004197  | -0.4415076564 |
| O  | -0.5406106811 | -0.5486608114 | -2.6658502296 |
| O  | 0.6021695709  | -0.3756037352 | 2.4674575977  |
| C  | 1.4329031079  | 0.1692794212  | 3.1839508634  |
| C  | 2.7862923382  | -0.3702395873 | 3.5477349047  |
| N  | 1.2706009089  | 1.3872536726  | 3.7698968932  |
| C  | 3.3802108688  | 0.6609105899  | 4.5076548797  |
| H  | 3.3460394173  | -0.4543965370 | 2.6020796682  |

|    |               |               |               |
|----|---------------|---------------|---------------|
| H  | 2.6944753381  | -1.3902477380 | 3.9443511736  |
| C  | 2.3760144205  | 1.7986019147  | 4.5562120474  |
| Br | -0.1948408965 | 2.4587481811  | 3.3606616869  |
| H  | 3.5266227333  | 0.2805522131  | 5.5277949431  |
| H  | 4.3428229792  | 1.0703544091  | 4.1673247293  |
| O  | 2.4452584584  | 2.8413415714  | 5.1295726052  |
| C  | -0.9990437598 | 4.5054691458  | 0.5566117025  |
| C  | -1.0548668827 | 5.9041490241  | 0.6022278197  |
| C  | 0.0997282070  | 3.8927667887  | -0.0643205896 |
| C  | -0.0326997492 | 6.6754844034  | 0.0542172797  |
| H  | -1.9347853039 | 6.3883154090  | 1.0320030976  |
| C  | 1.1243648150  | 4.6666348375  | -0.6026187637 |
| H  | 0.1518135669  | 2.8029430337  | -0.1396934820 |
| C  | 1.0642599886  | 6.0591856719  | -0.5451974482 |
| H  | -0.1027989059 | 7.7650626734  | 0.0843420328  |
| H  | 1.9779312209  | 4.1670035121  | -1.0774028875 |
| H  | 1.8669222319  | 6.6622628337  | -0.9759477343 |
| C  | -4.9733495621 | 2.7846072082  | -2.2433120798 |
| H  | -5.9925826513 | 3.1578612536  | -2.0575992623 |
| H  | -4.6547944158 | 3.1500982103  | -3.2313742075 |
| H  | -5.0064996445 | 1.6829514837  | -2.2828621924 |
| C  | -3.9593792234 | 4.7784372297  | -1.1483600985 |
| C  | -3.1848218476 | 5.4459875240  | -2.1067681466 |
| C  | -4.6962121062 | 5.5568566722  | -0.2500345123 |
| C  | -3.1328933598 | 6.8357942495  | -2.1570197469 |
| H  | -2.5964275628 | 4.8640687209  | -2.8201200755 |
| C  | -4.6476216158 | 6.9506506423  | -0.2929376948 |
| H  | -5.3149287805 | 5.0715140847  | 0.5067237854  |
| C  | -3.8619840423 | 7.5973753533  | -1.2443314044 |
| H  | -2.5089898192 | 7.3272069954  | -2.9068202431 |
| H  | -5.2280624317 | 7.5337374924  | 0.4261090203  |
| H  | -3.8179683316 | 8.6883338334  | -1.2752017392 |
| P  | 0.2633787630  | -0.6382110370 | -1.4373299124 |
| O  | 1.5979560837  | -1.5274635699 | -1.7209516104 |
| O  | -0.4841267266 | -1.6918980404 | -0.2723799386 |
| C  | 2.3604292910  | -1.9821690089 | -0.6788743915 |
| C  | -0.5335645274 | -3.0556261062 | -0.4717512295 |
| C  | 1.9114290050  | -3.0925379585 | 0.0113550260  |
| C  | 3.5773953358  | -1.3203681277 | -0.3666132811 |
| C  | 0.6530640878  | -3.7673712674 | -0.4130858841 |
| C  | -1.7935803703 | -3.6812112135 | -0.6817454994 |
| C  | 2.6562977128  | -3.5383216241 | 1.1535108134  |
| C  | 4.3406499065  | -1.8156747990 | 0.6643733474  |
| Si | 4.1771744777  | 0.2543996682  | -1.2282228062 |
| C  | 0.6358852318  | -5.1573348610 | -0.7671138576 |
| C  | -1.8118793951 | -5.0308657888 | -0.9459189335 |
| Si | -3.4287754535 | -2.7965736035 | -0.3483976736 |
| C  | 2.1869530255  | -4.5603198748 | 2.0263671086  |
| C  | 3.8997475957  | -2.9129898740 | 1.4567278110  |
| H  | 5.2959636570  | -1.3448748976 | 0.9304134732  |
| C  | 3.0767898426  | 0.8183297735  | -2.6191752633 |
| C  | 4.2899644680  | 1.5267400711  | 0.1462872044  |
| C  | 5.8829750841  | -0.0681864666 | -1.9403622756 |
| C  | 1.8240361841  | -5.9313860481 | -0.8859388422 |
| C  | -0.6111785541 | -5.7880649420 | -1.0394462839 |
| H  | -2.7591838507 | -5.5643610972 | -1.0904732367 |
| C  | -4.1267894905 | -1.8665288006 | -1.8033383578 |
| C  | -4.6633791462 | -4.1276578537 | 0.1459074623  |
| C  | -3.2075822917 | -1.6848680317 | 1.1578208664  |
| C  | 2.9222929320  | -4.9510047496 | 3.1191745007  |

|   |               |               |               |
|---|---------------|---------------|---------------|
| H | 1.2244100149  | -5.0310261511 | 1.8247526499  |
| C | 4.6482439552  | -3.3550653207 | 2.5815945441  |
| C | 2.4157459172  | 2.0547990613  | -2.6471618727 |
| C | 2.8877025903  | -0.0779494650 | -3.6900965666 |
| C | 3.1035374065  | 2.0727214580  | 0.6648366453  |
| C | 5.5204097869  | 1.9517740835  | 0.6718118225  |
| C | 6.5890920023  | 1.0233977577  | -2.4779942077 |
| C | 6.4627653944  | -1.3440104103 | -1.9984791932 |
| C | 1.7695140039  | -7.2596956587 | -1.2312112441 |
| H | 2.7897405985  | -5.4554259499 | -0.7122537471 |
| C | -0.6349387108 | -7.1668676090 | -1.3840463388 |
| C | -5.4971129519 | -1.5352257508 | -1.8092515815 |
| C | -3.3342620424 | -1.4820274588 | -2.8932822923 |
| C | -4.7951866733 | -4.5244695567 | 1.4861808048  |
| C | -5.4507492675 | -4.7636271380 | -0.8290200004 |
| C | -2.1156590983 | -1.8263840716 | 2.0438782161  |
| C | -4.1994006435 | -0.7394058647 | 1.4585040587  |
| C | 4.1736432081  | -4.3513511308 | 3.3984434312  |
| H | 2.5380407272  | -5.7321260108 | 3.7780497044  |
| H | 5.6071910008  | -2.8742842641 | 2.7932994024  |
| C | 1.5608328119  | 2.3822976322  | -3.7058818206 |
| H | 2.5436162683  | 2.7840775198  | -1.8373509696 |
| C | 2.0369727348  | 0.2509961774  | -4.7492942829 |
| H | 3.3821095282  | -1.0542714413 | -3.6946494011 |
| C | 3.1532529279  | 3.0587882057  | 1.6556138717  |
| H | 2.1194205283  | 1.7387515989  | 0.2928252870  |
| C | 5.5672214456  | 2.9145259806  | 1.6868607229  |
| H | 6.4594905052  | 1.5425802409  | 0.2912800429  |
| C | 7.8533639535  | 0.8419552199  | -3.0476027808 |
| H | 6.1559579975  | 2.0280396751  | -2.4632503347 |
| C | 7.7284439019  | -1.5262603413 | -2.5694148699 |
| H | 5.9339161368  | -2.2151892187 | -1.6057169091 |
| C | 0.5272242189  | -7.8911415056 | -1.4752937975 |
| H | 2.6944916327  | -7.8323285889 | -1.3243210765 |
| H | -1.6003503928 | -7.6396514041 | -1.5813201729 |
| C | -6.0558048398 | -0.8337330294 | -2.8793264942 |
| H | -6.1450085276 | -1.8299095385 | -0.9798967201 |
| C | -3.8954682727 | -0.7728192941 | -3.9655386737 |
| H | -2.2594853615 | -1.7129019851 | -2.9323070414 |
| C | -5.6951649179 | -5.5348834556 | 1.8452849071  |
| H | -4.1994801056 | -4.0484424225 | 2.2689637559  |
| C | -6.3499123419 | -5.7737698947 | -0.4711491644 |
| H | -5.3751215867 | -4.4729196353 | -1.8808772062 |
| C | -2.0004880399 | -0.9897014448 | 3.1695845427  |
| H | -1.3790829762 | -2.6297285035 | 1.9060474276  |
| C | -4.0988524690 | 0.0709892701  | 2.5992745815  |
| H | -5.0612420671 | -0.6062978218 | 0.7977692941  |
| H | 4.7543076060  | -4.6798853274 | 4.2624580775  |
| C | 1.3658373813  | 1.4784016023  | -4.7533441770 |
| H | 1.0353853608  | 3.3351008241  | -3.7031317697 |
| H | 1.8774069947  | -0.4583084698 | -5.5585840905 |
| C | 4.3831768423  | 3.4770282298  | 2.1719814953  |
| H | 2.2295643573  | 3.5227062970  | 2.0061609915  |
| H | 6.5263781022  | 3.2381684963  | 2.0847965442  |
| C | 8.4252789969  | -0.4338159611 | -3.0921690262 |
| H | 8.3903954550  | 1.6929684907  | -3.4612694927 |
| H | 8.1670512907  | -2.5209203457 | -2.6096083044 |
| H | 0.4977767822  | -8.9485079347 | -1.7446053653 |
| C | -5.2522386038 | -0.4496418050 | -3.9609707824 |
| H | -7.1140286673 | -0.5846035819 | -2.8753531628 |

|   |               |               |               |
|---|---------------|---------------|---------------|
| H | -3.2574482136 | -0.4689717425 | -4.7946241927 |
| C | -6.4729996463 | -6.1605177900 | 0.8670668545  |
| H | -5.7898267178 | -5.8321323287 | 2.8874270543  |
| H | -6.9560305566 | -6.2569539206 | -1.2346742578 |
| C | -2.9936239054 | -0.0387256493 | 3.4440218423  |
| H | -1.1642431511 | -1.1167940852 | 3.8589088242  |
| H | -4.8713053738 | 0.8102829336  | 2.8060401229  |
| H | 0.6830882196  | 1.7224689426  | -5.5652822969 |
| H | 4.4163107813  | 4.2463282922  | 2.9425186968  |
| H | 9.4083259086  | -0.5750537894 | -3.5370152201 |
| H | -5.6873316751 | 0.1005555136  | -4.7929763911 |
| H | -7.1735087814 | -6.9452582394 | 1.1457959995  |
| H | -2.8954882447 | 0.6153126495  | 4.3088901948  |

TS2a1

0 1

|    |               |               |               |
|----|---------------|---------------|---------------|
| O  | -1.8678890600 | 3.2172095359  | 0.4699399625  |
| C  | -1.2201518751 | 4.4031346661  | 0.2847676746  |
| C  | -1.2663473256 | 5.5693601575  | 1.3068992138  |
| C  | -1.7491071778 | 5.4090466289  | -0.7579765600 |
| C  | -1.1787966838 | 6.5586371394  | 0.1184739165  |
| H  | -2.2715840645 | 5.5965945603  | 1.7504031158  |
| H  | -0.5228474681 | 5.6236478220  | 2.1116216700  |
| H  | -2.8461442090 | 5.3816936423  | -0.7046208052 |
| H  | -1.4493169639 | 5.3257411023  | -1.8113594058 |
| C  | 0.1146488073  | 3.7508255806  | 0.0465067023  |
| C  | 0.5876554875  | 3.6058881095  | -1.3565592133 |
| H  | 0.4155420979  | 4.5275011592  | -1.9206840155 |
| H  | 1.6445840799  | 3.3350395591  | -1.4206476874 |
| Mg | -2.0979322268 | 1.3154470156  | 0.1093027510  |
| O  | -0.6285192972 | 0.3749310618  | 0.8898728263  |
| O  | 1.0353381601  | -0.7587944374 | 2.5683564106  |
| O  | -3.4791157815 | 0.8161270585  | -1.2112958558 |
| C  | -3.3720590671 | 0.4450784059  | -2.4224318389 |
| C  | -4.5995834056 | 0.0955676463  | -3.2482367521 |
| N  | -2.2396388841 | 0.3315678507  | -3.0746965105 |
| C  | -4.0053615861 | -0.1618853332 | -4.6255304599 |
| H  | -5.0888146484 | -0.7850545438 | -2.8032790328 |
| H  | -5.3236544057 | 0.9213620190  | -3.2030606148 |
| C  | -2.4887123050 | -0.0579749696 | -4.3871868161 |
| Br | -0.4078179767 | 2.1708101032  | -2.2608181769 |
| H  | -4.2898317793 | 0.5960358368  | -5.3703731798 |
| H  | -4.2413652049 | -1.1448752762 | -5.0524848389 |
| O  | -1.6486511177 | -0.2584289341 | -5.2274370897 |
| C  | 0.8613925929  | 3.1766924550  | 1.1331606271  |
| C  | 2.1596510523  | 2.6489036508  | 0.9348562547  |
| C  | 0.3032235824  | 3.0813603391  | 2.4343246738  |
| C  | 2.8563523390  | 2.0665875942  | 1.9792401659  |
| H  | 2.6454738702  | 2.6904172910  | -0.0404044542 |
| C  | 0.9955379813  | 2.4779178466  | 3.4646914257  |
| H  | -0.7201038690 | 3.4112425147  | 2.5968761686  |
| C  | 2.2720663244  | 1.9581162420  | 3.2379044629  |
| H  | 3.8545711742  | 1.6591118822  | 1.8021410427  |
| H  | 0.5293022326  | 2.3698889342  | 4.4430629308  |
| H  | 2.8067069926  | 1.4441514808  | 4.0388732052  |
| C  | -2.0077434153 | 7.8337811480  | 0.2352860667  |
| H  | -2.0264866303 | 8.3886897903  | -0.7146465794 |
| H  | -1.5874411938 | 8.5000294854  | 1.0039645827  |
| H  | -3.0462403858 | 7.5973650863  | 0.5116014897  |
| C  | 0.2526918242  | 6.8689791194  | -0.3162756256 |

|    |               |               |               |
|----|---------------|---------------|---------------|
| C  | 1.3697280014  | 6.6669904453  | 0.5002283955  |
| C  | 0.4718666166  | 7.3439477067  | -1.6191349591 |
| C  | 2.6621498571  | 6.9091008280  | 0.0277069365  |
| H  | 1.2483507409  | 6.3024544219  | 1.5209755290  |
| C  | 1.7559561302  | 7.5913246070  | -2.0930469073 |
| H  | -0.3820101373 | 7.5081107559  | -2.2820025126 |
| C  | 2.8617122270  | 7.3675727993  | -1.2701594384 |
| H  | 3.5163584521  | 6.7308807906  | 0.6847109638  |
| H  | 1.8968526050  | 7.9542136707  | -3.1132984004 |
| H  | 3.8716168113  | 7.5514167814  | -1.6418432929 |
| P  | 0.2721626837  | -0.7830289528 | 1.3033618559  |
| O  | 1.2101973700  | -1.0332624526 | -0.0305134944 |
| O  | -0.6610662314 | -2.1415117900 | 1.2797698810  |
| C  | 1.7331805313  | -2.2761904509 | -0.2882184853 |
| C  | -1.3166205819 | -2.4519582469 | 0.1141069355  |
| C  | 0.8683248162  | -3.2724884355 | -0.7129554026 |
| C  | 3.1349537623  | -2.5028859753 | -0.1501059588 |
| C  | -0.5705570066 | -2.9655296697 | -0.9310613447 |
| C  | -2.7234146762 | -2.2603979743 | 0.0270435707  |
| C  | 1.3644456950  | -4.6066047530 | -0.8907740387 |
| C  | 3.6135305887  | -3.7728653756 | -0.3831081126 |
| Si | 4.4483595229  | -1.1944568488 | 0.2017357121  |
| C  | -1.2106739153 | -3.2008160374 | -2.1897860664 |
| C  | -3.3522014524 | -2.6110406146 | -1.1478908832 |
| Si | -3.7827789501 | -1.6163990994 | 1.4462496005  |
| C  | 0.5184782924  | -5.7125271563 | -1.1888721973 |
| C  | 2.7556954346  | -4.8518698099 | -0.7278113574 |
| H  | 4.6855078445  | -3.9995329488 | -0.3020362217 |
| C  | 4.1895507677  | 0.3698233230  | -0.8065597587 |
| C  | 4.6611274780  | -0.8240799395 | 2.0238881110  |
| C  | 6.0896482958  | -1.8928117087 | -0.4106423453 |
| C  | -0.4901255295 | -3.5507059408 | -3.3648443252 |
| C  | -2.6234443030 | -3.0595746561 | -2.2800075903 |
| H  | -4.4409059551 | -2.5267509714 | -1.2575583136 |
| C  | -5.5714080927 | -1.7184248522 | 0.8532185084  |
| C  | -3.6080733461 | -2.6781269497 | 2.9827331913  |
| C  | -3.4191631141 | 0.1515714319  | 2.0009652357  |
| C  | 1.0352676732  | -6.9751995542 | -1.3474642253 |
| H  | -0.5556868736 | -5.5534325841 | -1.2836123523 |
| C  | 3.2626076999  | -6.1676474180 | -0.9083654677 |
| C  | 5.1306679605  | 1.4109937263  | -0.6990026328 |
| C  | 3.1701357763  | 0.4814672165  | -1.7635415114 |
| C  | 3.7695275464  | -1.2983099843 | 2.9952251047  |
| C  | 5.7749915733  | -0.0670793687 | 2.4393821111  |
| C  | 6.4190967733  | -1.8023862286 | -1.7734765676 |
| C  | 6.9890840189  | -2.5267701935 | 0.4617045034  |
| C  | -1.1432198993 | -3.7761750856 | -4.5505177118 |
| H  | 0.5973856052  | -3.6179579852 | -3.3199933066 |
| C  | -3.2745530092 | -3.3397901103 | -3.5124727607 |
| C  | -6.0932580774 | -0.7766300654 | -0.0500228396 |
| C  | -6.3907257458 | -2.7861280882 | 1.2541102711  |
| C  | -4.5566926666 | -2.5302375924 | 4.0130094204  |
| C  | -2.5599135320 | -3.5927506055 | 3.1568102824  |
| C  | -4.0833879257 | 1.2883019317  | 1.4881426670  |
| C  | -2.5893129183 | 0.3156210009  | 3.1312310667  |
| C  | 2.4246742443  | -7.2095262158 | -1.2170490463 |
| H  | 0.3651627887  | -7.8079590787 | -1.5722272687 |
| H  | 4.3369379434  | -6.3345302881 | -0.7907330228 |
| C  | 5.0600607443  | 2.5288675376  | -1.5355602211 |
| H  | 5.9401995292  | 1.3548220204  | 0.0339313259  |

|   |               |               |               |
|---|---------------|---------------|---------------|
| C | 3.1152958498  | 1.5886717286  | -2.6212078368 |
| H | 2.3917311524  | -0.2874749240 | -1.8533157711 |
| C | 3.9785269468  | -1.0135537992 | 4.3534867449  |
| H | 2.8797409313  | -1.8805803846 | 2.7183057164  |
| C | 5.9832218415  | 0.2159131042  | 3.7908509385  |
| H | 6.4982657058  | 0.3031432041  | 1.7074292799  |
| C | 7.6228774965  | -2.3315056339 | -2.2523864181 |
| H | 5.7399055042  | -1.3152829772 | -2.4791236316 |
| C | 8.1933761761  | -3.0556922604 | -0.0161518848 |
| H | 6.7614804454  | -2.6142122953 | 1.5274612471  |
| C | -2.5534566344 | -3.6885799600 | -4.6256525013 |
| H | -0.5695891431 | -4.0156981373 | -5.4477610213 |
| H | -4.3639386162 | -3.2514311988 | -3.5600972578 |
| C | -7.4016057305 | -0.8875075525 | -0.5286284550 |
| H | -5.4704501491 | 0.0665492426  | -0.3906658926 |
| C | -7.7022077123 | -2.9002787391 | 0.7760884662  |
| H | -6.0177894125 | -3.5493353420 | 1.9435853052  |
| C | -4.4657753146 | -3.2925180433 | 5.1806026184  |
| H | -5.3772370439 | -1.8142857275 | 3.9146145433  |
| C | -2.4684571290 | -4.3573615033 | 4.3277971568  |
| H | -1.7861572589 | -3.7139734276 | 2.3890856754  |
| C | -3.9013000408 | 2.5510973718  | 2.0802596322  |
| H | -4.7928296956 | 1.1971986482  | 0.6428514191  |
| C | -2.4552850204 | 1.5621447651  | 3.7469324265  |
| H | -2.0494130879 | -0.5398247737 | 3.5576630842  |
| H | 2.8229457075  | -8.2172244565 | -1.3521196704 |
| C | 4.0575356911  | 2.6127884541  | -2.5083873076 |
| H | 5.7959312461  | 3.3240269450  | -1.4440900480 |
| H | 2.3385247088  | 1.6356855575  | -3.3859889182 |
| C | 5.0814926508  | -0.2587186722 | 4.7520373670  |
| H | 3.2672334700  | -1.3843284165 | 5.0899618900  |
| H | 6.8480707646  | 0.7975277013  | 4.0994154997  |
| C | 8.5115392408  | -2.9584360875 | -1.3739733106 |
| H | 7.8665006417  | -2.2544923904 | -3.3098853719 |
| H | 8.8824433647  | -3.5426305647 | 0.6702754634  |
| H | -3.0593893497 | -3.8793869597 | -5.5740734317 |
| C | -8.2103131178 | -1.9508183549 | -0.1138063609 |
| H | -7.7925805076 | -0.1461394412 | -1.2216170182 |
| H | -8.3252369254 | -3.7319237077 | 1.0990111001  |
| C | -3.4210023766 | -4.2106846326 | 5.3378252579  |
| H | -5.2051033070 | -3.1715737368 | 5.9686300476  |
| H | -1.6478686494 | -5.0620222589 | 4.4481270376  |
| C | -3.1135416638 | 2.6819736969  | 3.2256560615  |
| H | -4.3873728737 | 3.4241669579  | 1.6460421741  |
| H | -1.8344267266 | 1.6584181776  | 4.6362186665  |
| H | 4.0215921276  | 3.4662913630  | -3.1819534648 |
| H | 5.2463375037  | -0.0427051962 | 5.8053592147  |
| H | 9.4476945101  | -3.3694125206 | -1.7460551523 |
| H | -9.2298951879 | -2.0382301082 | -0.4834228232 |
| H | -3.3504796043 | -4.8049624771 | 6.2464941736  |
| H | -3.0089054511 | 3.6517987783  | 3.7068396741  |

TS2a2

0 1

|   |               |               |               |
|---|---------------|---------------|---------------|
| O | -3.3349282661 | -1.3765051542 | -0.9012585557 |
| C | -4.1355904664 | -1.9118116307 | 0.0690505073  |
| C | -5.2143627800 | -1.1114617961 | 0.8509257607  |
| C | -5.2764650682 | -2.8645317149 | -0.3411536630 |
| C | -6.0621990043 | -2.4039121065 | 0.9148954431  |
| H | -5.6722746071 | -0.3827523690 | 0.1644858359  |

|    |               |               |               |
|----|---------------|---------------|---------------|
| H  | -4.9568575542 | -0.5958412413 | 1.7827776381  |
| H  | -5.7255376289 | -2.4491920254 | -1.2540876317 |
| H  | -5.0846914081 | -3.9333738371 | -0.5031498889 |
| C  | -2.9735139041 | -2.4667249769 | 0.8525116776  |
| C  | -2.6275342025 | -3.8962458037 | 0.6893068968  |
| H  | -3.4924544383 | -4.5030605786 | 0.4171876736  |
| H  | -2.1726707440 | -4.3048966417 | 1.5962617677  |
| O  | -0.6762190142 | -2.0039444939 | -3.2965772052 |
| C  | 0.3198863181  | -2.7886326130 | -3.3660736656 |
| C  | 1.5462712134  | -2.4436812510 | -4.1823155297 |
| N  | 0.4097498970  | -3.9307778300 | -2.7207662194 |
| C  | 2.3958811324  | -3.6996003688 | -4.0392626632 |
| H  | 1.9924891650  | -1.5494048704 | -3.7140057001 |
| H  | 1.2656046428  | -2.1791656453 | -5.2103809304 |
| C  | 1.6260609341  | -4.5414476464 | -3.0123331156 |
| Br | -1.2884068165 | -4.0833972892 | -0.7675653150 |
| H  | 2.4871845667  | -4.2787051494 | -4.9698861003 |
| H  | 3.4164580984  | -3.5153931138 | -3.6699313783 |
| O  | 2.0134875358  | -5.5757120486 | -2.5266802870 |
| C  | -2.1101971676 | -1.6026017380 | 1.6234197417  |
| C  | -0.9616266492 | -2.1180700493 | 2.2724022697  |
| C  | -2.3465597452 | -0.2097175328 | 1.7155673363  |
| C  | -0.1259025655 | -1.2929060617 | 3.0056623491  |
| H  | -0.6941716542 | -3.1711751024 | 2.1858851363  |
| C  | -1.5234991328 | 0.6038963535  | 2.4721523625  |
| H  | -3.1500891603 | 0.2427278009  | 1.1385381615  |
| C  | -0.4089912348 | 0.0673429943  | 3.1154662991  |
| H  | 0.7697264125  | -1.7092389279 | 3.4702265653  |
| H  | -1.7176919592 | 1.6734235718  | 2.5279951016  |
| H  | 0.2551941264  | 0.7264545789  | 3.6784848682  |
| C  | -7.5724441732 | -2.2384734615 | 0.7843419457  |
| H  | -8.0730651092 | -3.2107299262 | 0.6636384216  |
| H  | -7.9882614834 | -1.7562417258 | 1.6819436340  |
| H  | -7.8195815041 | -1.6159856577 | -0.0890095498 |
| C  | -5.7043701743 | -3.3047971672 | 2.0973205805  |
| C  | -5.0672227310 | -2.8436486179 | 3.2538541451  |
| C  | -5.9989312813 | -4.6747505713 | 2.0146450417  |
| C  | -4.7165219948 | -3.7208311222 | 4.2829409318  |
| H  | -4.8221537099 | -1.7865901356 | 3.3644786617  |
| C  | -5.6558535681 | -5.5519408230 | 3.0379114377  |
| H  | -6.4965028594 | -5.0648884444 | 1.1225472288  |
| C  | -5.0044843753 | -5.0776197933 | 4.1783054768  |
| H  | -4.2107060859 | -3.3336000448 | 5.1700265756  |
| H  | -5.8916976895 | -6.6140522553 | 2.9437508864  |
| H  | -4.7260203539 | -5.7647419095 | 4.9797299500  |
| Mg | -1.6323144764 | -1.1726606160 | -1.8222839285 |
| O  | 1.8047498008  | 0.2658331150  | -2.0265854912 |
| O  | -0.4296957490 | -0.1618980244 | -0.7163049447 |
| P  | 0.9076881327  | 0.5500884392  | -0.8857872503 |
| O  | 0.5875580357  | 2.1775765296  | -0.8803159996 |
| O  | 1.6182030753  | 0.3942536696  | 0.5854688505  |
| C  | 0.1086528955  | 2.8049884677  | 0.2341444788  |
| C  | 2.6737805315  | 1.2308450276  | 0.8591888960  |
| C  | 0.9607840399  | 2.9714166027  | 1.3169757393  |
| C  | -1.2191035294 | 3.3244190229  | 0.2396963297  |
| C  | 2.3799417494  | 2.5392527667  | 1.2071083221  |
| C  | 4.0083026173  | 0.7479640213  | 0.7644484681  |
| C  | 0.4556012015  | 3.5661095909  | 2.5181897933  |
| C  | -1.6496742327 | 4.0211283448  | 1.3473427069  |
| Si | -2.4256919773 | 3.2611140339  | -1.2080323282 |



|    |               |               |               |
|----|---------------|---------------|---------------|
| C  | 3.4539442024  | 3.4720789160  | 1.3935046849  |
| C  | 5.0336116907  | 1.6322726659  | 1.0099603730  |
| Si | 4.5151642865  | -1.0210823539 | 0.3380387653  |
| C  | 1.2036317961  | 3.5993039761  | 3.7302867142  |
| C  | -0.8526752959 | 4.1277982384  | 2.5193973608  |
| H  | -2.6407582595 | 4.4932075093  | 1.3682065172  |
| C  | -2.1485853830 | 1.8756489486  | -2.4345985032 |
| C  | -4.1962546278 | 3.0488390229  | -0.5900785462 |
| C  | -2.2200300773 | 4.9218355954  | -2.0532962689 |
| C  | 3.2444668184  | 4.8625647828  | 1.6172579532  |
| C  | 4.7938702215  | 3.0006830841  | 1.3118096926  |
| H  | 6.0817265297  | 1.3088709728  | 0.9599038746  |
| C  | 4.8351271510  | -1.2393798066 | -1.4924653802 |
| C  | 6.1605520837  | -1.2660902081 | 1.2371394549  |
| C  | 3.3242099064  | -2.3309675382 | 0.9487228065  |
| C  | 0.6883416584  | 4.1808124399  | 4.8628615627  |
| H  | 2.1974772209  | 3.1497959524  | 3.7521452240  |
| C  | -1.3490746738 | 4.7430118979  | 3.7017659871  |
| C  | -3.0819597625 | 0.8305547918  | -2.5690826117 |
| C  | -1.0346289973 | 1.9049130249  | -3.2901813857 |
| C  | -4.5308530485 | 2.6109189196  | 0.6989977572  |
| C  | -5.2352051219 | 3.2789798360  | -1.5117079283 |
| C  | -0.9754833753 | 5.2030586233  | -2.6471896595 |
| C  | -3.2141771576 | 5.9114197067  | -2.0706568735 |
| C  | 4.3045619786  | 5.7184145580  | 1.7920828533  |
| H  | 2.2275894323  | 5.2546281735  | 1.6382995460  |
| C  | 5.8696432766  | 3.9088753438  | 1.5083034308  |
| C  | 5.4709519523  | -2.4224592797 | -1.9189952166 |
| C  | 4.4944336743  | -0.2724956741 | -2.4476338046 |
| C  | 6.1953838357  | -1.4044225956 | 2.6351244029  |
| C  | 7.3773003458  | -1.2694980178 | 0.5358137613  |
| C  | 3.1283694316  | -2.5632235570 | 2.3220393771  |
| C  | 2.6992110819  | -3.1864080110 | 0.0277735568  |
| C  | -0.5980496984 | 4.7723067259  | 4.8497662810  |
| H  | 1.2770962037  | 4.1880554961  | 5.7825130292  |
| H  | -2.3498297455 | 5.1824164898  | 3.6823371909  |
| C  | -2.9254245940 | -0.1449323909 | -3.5757647118 |
| H  | -3.9602501391 | 0.7612905172  | -1.9115227017 |
| C  | -0.8540278797 | 0.9195447372  | -4.2663201146 |
| H  | -0.2759322345 | 2.6946976924  | -3.1906945704 |
| C  | -5.8685718062 | 2.4208875337  | 1.0683529517  |
| H  | -3.7530364708 | 2.4097467935  | 1.4381719699  |
| C  | -6.5714081193 | 3.0914696901  | -1.1450234372 |
| H  | -5.0115868101 | 3.6039721868  | -2.5331757385 |
| C  | -0.7396766025 | 6.4379018171  | -3.2587260946 |
| H  | -0.1704284888 | 4.4563163832  | -2.6347294415 |
| C  | -2.9789356735 | 7.1485160550  | -2.6833215330 |
| H  | -4.1847747291 | 5.7375127653  | -1.6021951850 |
| C  | 5.6349373377  | 5.2389222463  | 1.7509586190  |
| H  | 4.1177556028  | 6.7815500845  | 1.9577645725  |
| H  | 6.8922393193  | 3.5261383960  | 1.4538445884  |
| C  | 5.7829581043  | -2.6177671997 | -3.2664879245 |
| H  | 5.7292843697  | -3.2057006126 | -1.1994741053 |
| C  | 4.8008887294  | -0.4726336750 | -3.8020569868 |
| H  | 3.9604124357  | 0.6421534951  | -2.1597094341 |
| C  | 7.4094066715  | -1.5529621220 | 3.3134828205  |
| H  | 5.2663355816  | -1.4021335723 | 3.2155674127  |
| C  | 8.5943967372  | -1.4184505146 | 1.2115515071  |
| H  | 7.3957024203  | -1.1556641735 | -0.5516523230 |
| C  | 2.3619788571  | -3.6459431881 | 2.7629429595  |

|   |               |               |               |
|---|---------------|---------------|---------------|
| H | 3.5911457612  | -1.9049613096 | 3.0638640052  |
| C | 1.9441148147  | -4.2818865762 | 0.4674149098  |
| H | 2.7971948267  | -3.0178561688 | -1.0492550992 |
| H | -0.9910031482 | 5.2406054770  | 5.7541855178  |
| C | -1.7994745407 | -0.0985421150 | -4.4201554656 |
| H | -3.7014878785 | -0.9010124372 | -3.7324603737 |
| H | 0.0359979631  | 0.9368812634  | -4.8950324139 |
| C | -6.8907181215 | 2.6636110981  | 0.1478728333  |
| H | -6.1120033096 | 2.0884893525  | 2.0751745889  |
| H | -7.3643054121 | 3.2785451838  | -1.8669532161 |
| C | -1.7432661884 | 7.4120130013  | -3.2798831492 |
| H | 0.2268155657  | 6.6420509776  | -3.7155120575 |
| H | -3.7594772144 | 7.9060693154  | -2.6924562622 |
| H | 6.4680944822  | 5.9288298013  | 1.8977478922  |
| C | 5.4501080466  | -1.6380314148 | -4.2105175893 |
| H | 6.2832699572  | -3.5299974327 | -3.5825669299 |
| H | 4.5235701167  | 0.2851725190  | -4.5312910553 |
| C | 8.6126479057  | -1.5617904708 | 2.6012909935  |
| H | 7.4176860246  | -1.6638086627 | 4.3952468016  |
| H | 9.5271157882  | -1.4245934621 | 0.6516885253  |
| C | 1.7758536778  | -4.5133935395 | 1.8333893452  |
| H | 2.2396296726  | -3.8289727382 | 3.8269458007  |
| H | 1.5080829025  | -4.9651550927 | -0.2700354061 |
| H | -1.6661546862 | -0.8625242008 | -5.1890093980 |
| H | -7.9309376681 | 2.5218420630  | 0.4345231572  |
| H | -1.5603124277 | 8.3729236391  | -3.7567929900 |
| H | 5.6950477174  | -1.7893634479 | -5.2595747667 |
| H | 9.5576559016  | -1.6805283287 | 3.1266315978  |
| H | 1.2047644052  | -5.3741369154 | 2.1726685729  |

TS2b1

0 1

|    |               |               |               |
|----|---------------|---------------|---------------|
| O  | -2.5965405453 | 0.0725331975  | -0.1240065408 |
| C  | -3.7883840327 | -0.1976658965 | -0.6092394322 |
| C  | -4.2001925942 | 0.4808338668  | -2.1007989921 |
| C  | -4.9655417215 | 0.6359506754  | -0.0405821334 |
| C  | -5.3695667885 | 1.2187249688  | -1.4206697378 |
| H  | -3.3174213703 | 1.0929995743  | -2.3338111367 |
| H  | -4.4310872481 | -0.1585293777 | -2.9623446074 |
| H  | -4.5434781604 | 1.3945055720  | 0.6326256399  |
| H  | -5.7275520701 | 0.0805821486  | 0.5192609185  |
| C  | -4.0570575689 | -1.5564690229 | -1.0980901240 |
| C  | -5.3947778750 | -2.1435888507 | -0.8304302560 |
| H  | -6.2142044353 | -1.4206561910 | -0.8354468300 |
| H  | -5.6687973454 | -3.0111173292 | -1.4326752085 |
| O  | -2.3214279748 | -0.6489110000 | 3.1230966161  |
| C  | -3.1286895847 | -1.2197647759 | 3.9222854798  |
| C  | -3.1966794723 | -0.7967962936 | 5.3861809094  |
| N  | -3.9517036865 | -2.1919117334 | 3.6097780674  |
| C  | -4.2582112122 | -1.7284942542 | 5.9518416557  |
| H  | -2.2021965209 | -0.9101735548 | 5.8421357614  |
| H  | -3.4553976606 | 0.2717624705  | 5.4440227616  |
| C  | -4.6950435283 | -2.5517827628 | 4.7275869700  |
| Br | -5.0303198295 | -2.6472135924 | 1.0388030743  |
| H  | -5.1344827031 | -1.2151207193 | 6.3719772138  |
| H  | -3.8835406813 | -2.4133891987 | 6.7259416007  |
| O  | -5.5656751709 | -3.3863541405 | 4.7389898782  |
| C  | -5.2289558662 | 2.7427796119  | -1.4983851901 |
| H  | -5.9813633316 | 3.2300026441  | -0.8599902281 |
| H  | -5.3772131786 | 3.0948090830  | -2.5305222477 |

|    |                |               |               |
|----|----------------|---------------|---------------|
| H  | -4.2283132070  | 3.0585165851  | -1.1644705106 |
| C  | -6.7539586311  | 0.8188967982  | -1.9130799664 |
| C  | -6.9959862115  | 0.5588851417  | -3.2666678941 |
| C  | -7.8376997657  | 0.7697555597  | -1.0272805258 |
| C  | -8.2745898328  | 0.2358478024  | -3.7190564394 |
| H  | -6.1765507296  | 0.6135525455  | -3.9878493984 |
| C  | -9.1173941171  | 0.4462857296  | -1.4747694683 |
| H  | -7.6833478212  | 0.9860439011  | 0.0328289668  |
| C  | -9.3399775650  | 0.1723186434  | -2.8232328435 |
| H  | -8.4376738947  | 0.0326480892  | -4.7796409691 |
| H  | -9.9450616108  | 0.4074063085  | -0.7634607889 |
| H  | -10.3407810088 | -0.0861729804 | -3.1746916263 |
| C  | -3.0430030839  | -2.3423242807 | -1.7864997773 |
| C  | -3.3172979189  | -3.6679496528 | -2.2061714965 |
| C  | -1.7730837501  | -1.8001971442 | -2.0921821950 |
| C  | -2.3729643896  | -4.4040962453 | -2.9008286310 |
| H  | -4.2648202499  | -4.1473119539 | -1.9653150902 |
| C  | -0.8345790916  | -2.5407020252 | -2.8021898790 |
| H  | -1.5035203623  | -0.8015583399 | -1.7516931044 |
| C  | -1.1298668310  | -3.8386447268 | -3.2067734513 |
| H  | -2.6003180274  | -5.4280970816 | -3.2016502717 |
| H  | 0.1451463277   | -2.0923857607 | -2.9689008415 |
| H  | -0.3802719378  | -4.4242384762 | -3.7462615073 |
| Mg | -1.4293144742  | -0.1497271523 | 1.4100880195  |
| O  | 0.3293708177   | 0.4287500882  | 0.8199087735  |
| P  | 1.4130247512   | 0.1448294003  | -0.2126403872 |
| O  | 1.1665986510   | -0.7631064649 | -1.3604402688 |
| O  | 1.9981919148   | 1.5489760616  | -0.8339302500 |
| O  | 2.6991414097   | -0.2632333787 | 0.7273333746  |
| C  | 2.7902206865   | 2.4187461341  | -0.1315564095 |
| C  | 3.8947511916   | -0.4122173135 | 0.0713782111  |
| C  | 4.0876489731   | 2.0530308846  | 0.1966468966  |
| C  | 2.2524547126   | 3.6935051315  | 0.1892217473  |
| C  | 4.6142309012   | 0.7295799752  | -0.2371326448 |
| C  | 4.3138314348   | -1.7157530597 | -0.2987485046 |
| C  | 4.8754290668   | 2.9607549547  | 0.9808732059  |
| C  | 3.0436695000   | 4.5949583820  | 0.8621211123  |
| Si | 0.4265001671   | 4.0692829528  | -0.0910481159 |
| C  | 5.8115976175   | 0.5957327978  | -1.0159178646 |
| C  | 5.5022132093   | -1.8444028713 | -0.9787392015 |
| Si | 3.2776795882   | -3.2725149814 | -0.0318977411 |
| C  | 6.1534882226   | 2.6123677416  | 1.5041190599  |
| C  | 4.3584052272   | 4.2538394699  | 1.2820496228  |
| H  | 2.6680452633   | 5.5916018822  | 1.1259513242  |
| C  | -0.2879091252  | 3.6782503504  | -1.7769641710 |
| C  | -0.4984639608  | 3.1674733923  | 1.2655990728  |
| C  | 0.1931141751   | 5.9186446324  | 0.1598378337  |
| C  | 6.5453635554   | 1.7142249422  | -1.5037595875 |
| C  | 6.2712457165   | -0.7092128442 | -1.3572703807 |
| H  | 5.8711914083   | -2.8316195805 | -1.2860879495 |
| C  | 3.0967066846   | -4.0395534520 | -1.7360145544 |
| C  | 4.2344371270   | -4.4380104101 | 1.0873801835  |
| C  | 1.5581137694   | -3.0396443205 | 0.6855028362  |
| C  | 6.8873304320   | 3.5100426044  | 2.2398696394  |
| H  | 6.5474693231   | 1.6120754840  | 1.3220427141  |
| C  | 5.1489808484   | 5.1661505604  | 2.0339452245  |
| C  | -1.5803130753  | 4.1662187972  | -2.0546980614 |
| C  | 0.3763287646   | 2.9331012462  | -2.7601924790 |
| C  | 0.0395551780   | 3.1793884841  | 2.5630827559  |
| C  | -1.7278552246  | 2.5242314655  | 1.0423568133  |

|   |               |               |               |
|---|---------------|---------------|---------------|
| C | 0.7120737136  | 6.7926181811  | -0.8121226023 |
| C | -0.4723915696 | 6.4586845344  | 1.2699920222  |
| C | 7.6903991874  | 1.5430848619  | -2.2424843708 |
| H | 6.1848553421  | 2.7209619479  | -1.2924562850 |
| C | 7.4673628481  | -0.8528309663 | -2.1128874534 |
| C | 3.3959630414  | -5.3799798953 | -2.0170352627 |
| C | 2.6134766592  | -3.2150940921 | -2.7683289583 |
| C | 3.6727499226  | -4.9383324750 | 2.2724579282  |
| C | 5.5371342873  | -4.8371602601 | 0.7384577251  |
| C | 1.3085888820  | -2.3084886923 | 1.8543444545  |
| C | 0.4699372235  | -3.6249326996 | 0.0080575643  |
| C | 6.3894473876  | 4.8093328643  | 2.4989949111  |
| H | 7.8624455828  | 3.2156176796  | 2.6339563191  |
| H | 4.7419746400  | 6.1588209845  | 2.2443481821  |
| C | -2.1956578823 | 3.8988156948  | -3.2806050937 |
| H | -2.1164258409 | 4.7716620540  | -1.3182885499 |
| C | -0.2409790419 | 2.6638371827  | -3.9896039426 |
| H | 1.3867977945  | 2.5426761365  | -2.5832178036 |
| C | -0.6483681614 | 2.5860436033  | 3.6290111055  |
| H | 1.0107011791  | 3.6435924850  | 2.7612487361  |
| C | -2.4452859086 | 1.9735684131  | 2.1196134376  |
| H | -2.1522805716 | 2.4516933019  | 0.0313739925  |
| C | 0.5705706176  | 8.1769428993  | -0.6721290140 |
| H | 1.2302756715  | 6.4006077492  | -1.6921697213 |
| C | -0.6151759772 | 7.8447102744  | 1.4103219224  |
| H | -0.8902294857 | 5.8062585322  | 2.0401849268  |
| C | 8.1691094135  | 0.2455498929  | -2.5416876134 |
| H | 8.2330510007  | 2.4176575597  | -2.6077896229 |
| H | 7.8121762179  | -1.8608832360 | -2.3576866597 |
| C | 3.2211206832  | -5.8909345236 | -3.3094324135 |
| H | 3.7682589168  | -6.0426040225 | -1.2320509238 |
| C | 2.4410017831  | -3.7256605068 | -4.0588048549 |
| H | 2.3572356684  | -2.1600570564 | -2.5663424052 |
| C | 4.3957486466  | -5.8147576381 | 3.0915749647  |
| H | 2.6614593438  | -4.6540244527 | 2.5750977169  |
| C | 6.2600468251  | -5.7123020363 | 1.5548414603  |
| H | 6.0049685523  | -4.4661952898 | -0.1774516806 |
| C | -0.0042677209 | -2.1408894486 | 2.3325085853  |
| H | 2.1332433687  | -1.8400286119 | 2.4052785943  |
| C | -0.8315866525 | -3.4719778558 | 0.4849132406  |
| H | 0.6281757319  | -4.2061005087 | -0.9054357546 |
| H | 6.9861222952  | 5.5163709881  | 3.0788455161  |
| C | -1.5258051426 | 3.1433627858  | -4.2500630354 |
| H | -3.1908973422 | 4.2849808405  | -3.4858423467 |
| H | 0.2868892147  | 2.0769648974  | -4.7386684139 |
| C | -1.8935930359 | 1.9951930208  | 3.4110228196  |
| H | -0.2099398580 | 2.5857873627  | 4.6245072650  |
| H | -3.4572891487 | 1.5734422236  | 1.9572170793  |
| C | -0.0933755699 | 8.7044997232  | 0.4403333447  |
| H | 0.9755223848  | 8.8440716781  | -1.4301273460 |
| H | -1.1337042663 | 8.2516653537  | 2.2756062196  |
| H | 9.0841585550  | 0.1228463467  | -3.1245842091 |
| C | 2.7464373781  | -5.0635855607 | -4.3306469020 |
| H | 3.4586520171  | -6.9313866267 | -3.5177115717 |
| H | 2.0806095388  | -3.0769227237 | -4.8539195237 |
| C | 5.6893694729  | -6.2022538289 | 2.7343221427  |
| H | 3.9474741840  | -6.1933187240 | 4.0077965125  |
| H | 7.2675583449  | -6.0110521648 | 1.2744489510  |
| C | -1.0762547836 | -2.7296983317 | 1.6477773871  |
| H | -0.1685573318 | -1.6148750222 | 3.2818240995  |

|   |               |               |               |
|---|---------------|---------------|---------------|
| H | -1.6636016794 | -3.9447789351 | -0.0343708813 |
| H | -2.0032647959 | 2.9369905621  | -5.2052821998 |
| H | -2.4446299711 | 1.5512230192  | 4.2410056315  |
| H | -0.2039384811 | 9.7815363470  | 0.5487274960  |
| H | 2.6195547178  | -5.4579306873 | -5.3365013850 |
| H | 6.2518943992  | -6.8820907193 | 3.3708847572  |
| H | -2.1000400974 | -2.7013454123 | 2.0524236572  |

TS2b2

0 1

|    |                |               |               |
|----|----------------|---------------|---------------|
| O  | -2.7139192827  | 0.1724743427  | 0.3560995530  |
| C  | -4.0248449090  | 0.0122096137  | 0.3943398918  |
| C  | -4.9313646817  | 1.3226180293  | 0.8827731641  |
| C  | -4.7956509747  | 0.1218482297  | -0.9488383341 |
| C  | -5.6808996266  | 1.3007527413  | -0.4653328781 |
| H  | -4.1904035158  | 2.1276676777  | 0.9918391987  |
| H  | -5.5328818454  | 1.2606841253  | 1.7997680448  |
| H  | -4.0801442665  | 0.4189991257  | -1.7290159582 |
| H  | -5.3032522168  | -0.7865292377 | -1.2949029632 |
| C  | -4.5613441986  | -0.9124655656 | 1.4160466693  |
| C  | -5.7262757686  | -1.7543012351 | 1.1091401443  |
| H  | -6.4275602077  | -1.3308830434 | 0.3856857842  |
| H  | -6.2612707794  | -2.1732546196 | 1.9643447273  |
| Mg | -1.0706980106  | -0.6740832412 | -0.3430766696 |
| O  | 0.2068811748   | 0.6585933509  | 0.7866790131  |
| O  | 1.0165981425   | -0.7631977188 | -1.0739850794 |
| O  | -1.8151933464  | -2.1230448193 | -1.5053312287 |
| C  | -2.0626070397  | -3.2419927756 | -2.0317706307 |
| C  | -1.4212155160  | -3.6569447603 | -3.3497323678 |
| N  | -2.8706669825  | -4.1552808558 | -1.5284833554 |
| C  | -1.9662198928  | -5.0628399966 | -3.5586109763 |
| H  | -0.3258441576  | -3.5972490099 | -3.2544157500 |
| H  | -1.7148282268  | -2.9418874117 | -4.1323260597 |
| C  | -2.9234695143  | -5.2590900038 | -2.3703286626 |
| Br | -4.6326431506  | -3.1209281980 | 0.1539982751  |
| H  | -2.5203395112  | -5.2041210946 | -4.4971125533 |
| H  | -1.1929625436  | -5.8446358072 | -3.5202647388 |
| O  | -3.6160340819  | -6.2317361027 | -2.2007065957 |
| C  | -5.4799285256  | 2.5835289244  | -1.2779487125 |
| H  | -5.8891698612  | 2.4644480368  | -2.2927202260 |
| H  | -5.9931451646  | 3.4331423082  | -0.8013423827 |
| H  | -4.4095047270  | 2.8273928165  | -1.3619339682 |
| C  | -7.1695782997  | 0.9974361334  | -0.3703456341 |
| C  | -7.9527443881  | 1.5162344500  | 0.6669061848  |
| C  | -7.8066828232  | 0.2432983112  | -1.3639726089 |
| C  | -9.3240225563  | 1.2706924389  | 0.7247069291  |
| H  | -7.4900291403  | 2.1299367529  | 1.4441064126  |
| C  | -9.1768822001  | -0.0059620486 | -1.3098433367 |
| H  | -7.2245016620  | -0.1590056491 | -2.1967765912 |
| C  | -9.9410246350  | 0.5027542469  | -0.2608682449 |
| H  | -9.9133832867  | 1.6835662666  | 1.5464415375  |
| H  | -9.6492975117  | -0.6024630261 | -2.0932456442 |
| H  | -11.0137887187 | 0.3047433378  | -0.2143396126 |
| C  | -3.9466307940  | -0.9907930389 | 2.7417154270  |
| C  | -4.3102409184  | -2.0075725322 | 3.6506790748  |
| C  | -3.0197169588  | -0.0128271958 | 3.1642761208  |
| C  | -3.7774039066  | -2.0396062624 | 4.9313043902  |
| H  | -4.9837685696  | -2.8092446178 | 3.3465860329  |
| C  | -2.5161968763  | -0.0324699667 | 4.4595083405  |
| H  | -2.6832962155  | 0.7424345236  | 2.4537970560  |

|    |               |               |               |
|----|---------------|---------------|---------------|
| C  | -2.8904108037 | -1.0433581877 | 5.3437288622  |
| H  | -4.0553397674 | -2.8454798819 | 5.6128831838  |
| H  | -1.8066293740 | 0.7361938631  | 4.7709054356  |
| H  | -2.4797810859 | -1.0646388319 | 6.3556496865  |
| P  | 1.4114330201  | 0.2755688024  | -0.0475184439 |
| O  | 2.1395275262  | 1.5068330184  | -0.8230856643 |
| O  | 2.6186622542  | -0.1352121970 | 0.9594010578  |
| C  | 2.6936459377  | 2.4963334335  | -0.0393102837 |
| C  | 3.8955730509  | -0.2206262750 | 0.4442585462  |
| C  | 3.9219893851  | 2.2498855714  | 0.5497075479  |
| C  | 1.9601345031  | 3.6949465066  | 0.1503930274  |
| C  | 4.5983017496  | 0.9564521401  | 0.2487139670  |
| C  | 4.4070647276  | -1.4994572126 | 0.1054466865  |
| C  | 4.4480975601  | 3.2274544612  | 1.4549653167  |
| C  | 2.4963834215  | 4.6538657503  | 0.9776573911  |
| Si | 0.2816939084  | 3.9953436400  | -0.6717514398 |
| C  | 5.9020754839  | 0.8824332502  | -0.3427982130 |
| C  | 5.6773492258  | -1.5682918780 | -0.4171661773 |
| Si | 3.3921984457  | -3.0911044729 | 0.2317814925  |
| C  | 5.6399851793  | 3.0155394869  | 2.2036099064  |
| C  | 3.7325317512  | 4.4452250239  | 1.6517595801  |
| H  | 1.9677020999  | 5.5969882818  | 1.1609286834  |
| C  | 0.4307711506  | 5.5083096552  | -1.7777106311 |
| C  | -0.2432705767 | 2.5806988688  | -1.7763453823 |
| C  | -0.9644105296 | 4.3333823536  | 0.6841025808  |
| C  | 6.6597642818  | 2.0383864534  | -0.6846625578 |
| C  | 6.4515279889  | -0.3973600919 | -0.6479750244 |
| H  | 6.1144625551  | -2.5326537946 | -0.7033867062 |
| C  | 3.2447040141  | -3.7923939480 | -1.4969899271 |
| C  | 4.3075438212  | -4.3038136263 | 1.3377575407  |
| C  | 1.7244870547  | -2.8127195770 | 1.0284682398  |
| C  | 6.1122783220  | 3.9737000695  | 3.0666131117  |
| H  | 6.1768836169  | 2.0730574853  | 2.0902422643  |
| C  | 4.2545407282  | 5.4204860755  | 2.5454958948  |
| C  | -0.7188341389 | 5.9330966998  | -2.4691309078 |
| C  | 1.6308147995  | 6.2077043516  | -1.9703321952 |
| C  | -1.3859885121 | 1.7911799746  | -1.5612917639 |
| C  | 0.6034165063  | 2.2710312944  | -2.8561195842 |
| C  | -1.5332949093 | 5.6038290368  | 0.8672210593  |
| C  | -1.3143003055 | 3.2969489655  | 1.5673402072  |
| C  | 7.9063901075  | 1.9258395983  | -1.2497482960 |
| H  | 6.2372603514  | 3.0261675983  | -0.5001454126 |
| C  | 7.7487426821  | -0.4792365392 | -1.2248535663 |
| C  | 2.5203172727  | -3.0744610877 | -2.4647636353 |
| C  | 3.8589262658  | -4.9994423318 | -1.8680291434 |
| C  | 5.4989667203  | -3.9916355275 | 2.0081746961  |
| C  | 3.7394716449  | -5.5777519062 | 1.5236383670  |
| C  | 1.7290611781  | -2.3187006057 | 2.3454503003  |
| C  | 0.4944621286  | -3.0308155349 | 0.3851231827  |
| C  | 5.4200153023  | 5.1966612888  | 3.2344717506  |
| H  | 7.0271375993  | 3.7877770672  | 3.6330117842  |
| H  | 3.7009365180  | 6.3531054981  | 2.6817586407  |
| C  | -0.6691415049 | 7.0394558738  | -3.3227248423 |
| H  | -1.6662351195 | 5.3995730609  | -2.3518525748 |
| C  | 1.6816977638  | 7.3159050638  | -2.8254935911 |
| H  | 2.5459011581  | 5.8963383567  | -1.4617812453 |
| C  | -1.6620801956 | 0.7017712577  | -2.4025151526 |
| H  | -2.0818428094 | 2.0180494969  | -0.7382544430 |
| C  | 0.3422442157  | 1.1668684210  | -3.6782244176 |
| H  | 1.4980326572  | 2.8711738951  | -3.0536931277 |

|   |               |               |               |
|---|---------------|---------------|---------------|
| C | -2.4397280303 | 5.8371751454  | 1.9082892293  |
| H | -1.2765547291 | 6.4315520835  | 0.2011860384  |
| C | -2.2160178981 | 3.5335879094  | 2.6109053388  |
| H | -0.8831427365 | 2.2852460531  | 1.4489208644  |
| C | 8.4669267509  | 0.6536488930  | -1.5135611656 |
| H | 8.4672530498  | 2.8274015960  | -1.5046088430 |
| H | 8.1599073155  | -1.4675399499 | -1.4458664771 |
| C | 2.4115009708  | -3.5576886539 | -3.7731678336 |
| H | 2.0259327470  | -2.1212270301 | -2.2088107264 |
| C | 3.7464917214  | -5.4844294702 | -3.1763443188 |
| H | 4.4347280355  | -5.5791030392 | -1.1425876947 |
| C | 6.1196789222  | -4.9348568794 | 2.8369388913  |
| H | 5.9585576044  | -3.0070144355 | 1.8995152112  |
| C | 4.3586983403  | -6.5200818470 | 2.3506251431  |
| H | 2.8021728447  | -5.8468538059 | 1.0270187853  |
| C | 0.5271810510  | -2.0371141897 | 3.0048857592  |
| H | 2.6731805498  | -2.1283047313 | 2.8667258417  |
| C | -0.7135401506 | -2.7730853616 | 1.0539070151  |
| H | 0.4613659688  | -3.4146552439 | -0.6406192644 |
| H | 5.8081611570  | 5.9519617343  | 3.9205195118  |
| C | 0.5322721802  | 7.7338293314  | -3.5004844397 |
| H | -1.5641241094 | 7.3586581704  | -3.8522074523 |
| H | 2.6193221599  | 7.8494523771  | -2.9656540535 |
| C | -0.7813083924 | 0.3736898565  | -3.4426534807 |
| H | -2.6022032017 | 0.1336889792  | -2.2873805289 |
| H | 1.0276554137  | 0.9194534843  | -4.4857117271 |
| C | -2.7803173956 | 4.8015120261  | 2.7821985671  |
| H | -2.8745533552 | 6.8251664507  | 2.0382236123  |
| H | -2.4703095174 | 2.7319467937  | 3.2990430940  |
| H | 9.4604098922  | 0.5778776689  | -1.9595965570 |
| C | 3.0228006105  | -4.7634223459 | -4.1302605706 |
| H | 1.8567647104  | -2.9878944380 | -4.5152727510 |
| H | 4.2236314549  | -6.4223836936 | -3.4501653724 |
| C | 5.5517975555  | -6.1998922165 | 3.0070488725  |
| H | 7.0443641314  | -4.6802037470 | 3.3499843017  |
| H | 3.9105484660  | -7.5022225785 | 2.4858115747  |
| C | -0.6891335029 | -2.2711850241 | 2.3607936123  |
| H | 0.5434765726  | -1.6340861042 | 4.0140257403  |
| H | -1.6727546872 | -3.0679125916 | 0.5988132279  |
| H | 0.5712530342  | 8.5944189677  | -4.1651299409 |
| H | -0.9795147766 | -0.4982892254 | -4.0637332888 |
| H | -3.4790727552 | 4.9829808095  | 3.5957946780  |
| H | 2.9373763204  | -5.1385075983 | -5.1479945727 |
| H | 6.0338418917  | -6.9334034091 | 3.6499791412  |
| H | -1.6244795181 | -2.0949221518 | 2.8867751580  |

TS2c1

0 1

|   |               |               |               |
|---|---------------|---------------|---------------|
| O | -2.6042633426 | 0.6803082257  | 0.0488968659  |
| C | -3.1910993631 | -0.1933617252 | -0.7853914975 |
| C | -2.4309881064 | -1.5131631655 | -1.1165724768 |
| C | -3.0870374679 | 0.1658788311  | -2.3411701363 |
| C | -2.4575215726 | -1.2157107587 | -2.6414769973 |
| H | -1.4099922403 | -1.4578144493 | -0.7160645813 |
| H | -2.8978368276 | -2.4467442450 | -0.7838653561 |
| H | -2.3794687951 | 1.0050137482  | -2.4117543154 |
| H | -4.0075795695 | 0.4293452853  | -2.8818975685 |
| C | -1.0606931435 | -1.1294182915 | -3.2666590251 |
| H | -1.1230607602 | -0.7226476238 | -4.2883991749 |
| H | -0.6054800698 | -2.1292137820 | -3.3180443078 |

|    |               |               |               |
|----|---------------|---------------|---------------|
| H  | -0.4017580490 | -0.4966044127 | -2.6562753654 |
| C  | -3.3187308580 | -2.1245261315 | -3.5058693145 |
| C  | -3.4505679884 | -3.4896511853 | -3.2370592543 |
| C  | -3.9272464726 | -1.6225319737 | -4.6637415337 |
| C  | -4.1838935619 | -4.3219386029 | -4.0820231722 |
| H  | -2.9743766941 | -3.9147487009 | -2.3506002918 |
| C  | -4.6594232590 | -2.4485912349 | -5.5126976006 |
| H  | -3.8223342154 | -0.5621599002 | -4.9099653463 |
| C  | -4.7953860791 | -3.8054544686 | -5.2219163347 |
| H  | -4.2780848239 | -5.3839941532 | -3.8438079889 |
| H  | -5.1247455198 | -2.0305590186 | -6.4083942545 |
| C  | -4.6819516184 | -0.3067571798 | -0.5853359978 |
| C  | -5.3711595549 | 0.8023945266  | -0.0427603946 |
| H  | -4.8184310273 | 1.7427845022  | 0.0051255313  |
| H  | -6.4562199094 | 0.8498479503  | -0.1631589400 |
| C  | -5.4723165020 | -1.4661057097 | -1.0595251126 |
| C  | -5.3950749577 | -2.7135421943 | -0.4268324184 |
| C  | -6.3158362537 | -1.3066313342 | -2.1651820758 |
| C  | -6.1499007605 | -3.7813494455 | -0.8979669945 |
| H  | -4.7631107022 | -2.8346935099 | 0.4543365110  |
| C  | -7.0379156253 | -2.3897197942 | -2.6579338443 |
| H  | -6.3812276497 | -0.3369099349 | -2.6636248746 |
| C  | -6.9593277163 | -3.6260384563 | -2.0225568520 |
| H  | -6.0976879355 | -4.7448365821 | -0.3878191069 |
| H  | -7.6629831610 | -2.2647225954 | -3.5433456925 |
| O  | -2.1277703940 | 0.0411040931  | 3.3969003044  |
| C  | -2.9509014430 | -0.4572093767 | 4.1966367033  |
| C  | -2.5447210418 | -0.9627275519 | 5.5694256569  |
| N  | -4.2517791618 | -0.6038150939 | 3.9789721768  |
| C  | -3.8545798443 | -1.4672182299 | 6.1633271191  |
| H  | -1.7707322704 | -1.7420790386 | 5.4355119091  |
| H  | -2.0750386584 | -0.1423205357 | 6.1296647035  |
| C  | -4.8917099970 | -1.1975997874 | 5.0664861480  |
| Br | -4.9762384243 | -0.0398006527 | 1.8807743374  |
| H  | -4.1617779728 | -0.9421864619 | 7.0782948444  |
| H  | -3.8553284900 | -2.5419777920 | 6.3924190886  |
| O  | -6.0642446941 | -1.4512344766 | 5.1254246798  |
| H  | -5.3707868978 | -4.4570406706 | -5.8830491918 |
| H  | -7.5311134388 | -4.4732820479 | -2.4055983833 |
| Mg | -1.5736329094 | 0.8066781785  | 1.6318098563  |
| O  | 0.3460695916  | 0.6658123888  | 1.3782602825  |
| P  | 1.2131378141  | 0.0613690864  | 0.2771318852  |
| O  | 0.7540411523  | -1.1095702057 | -0.5077022671 |
| O  | 1.5893662876  | 1.2687067114  | -0.7889762996 |
| O  | 2.6787044884  | -0.1309615752 | 0.9824214048  |
| C  | 2.3911413666  | 2.3138876250  | -0.4095061310 |
| C  | 3.7302879263  | -0.3661142254 | 0.1254888161  |
| C  | 3.7454249441  | 2.0826541619  | -0.2212628931 |
| C  | 1.8124517335  | 3.6030263292  | -0.2464018306 |
| C  | 4.2925845518  | 0.7289029061  | -0.5074280190 |
| C  | 4.1639594685  | -1.6975562370 | -0.1106612418 |
| C  | 4.5701068899  | 3.1492365490  | 0.2630512850  |
| C  | 2.6250793757  | 4.6435243177  | 0.1455250965  |
| Si | -0.0242757763 | 3.9428124801  | -0.5033195025 |
| C  | 5.3261615939  | 0.5165458880  | -1.4776072426 |
| C  | 5.1949105883  | -1.8899423172 | -1.0010519089 |
| Si | 3.3973622060  | -3.2498222922 | 0.6461693022  |
| C  | 5.9356521878  | 2.9607868886  | 0.6203712373  |
| C  | 4.0040358091  | 4.4455860334  | 0.4267601558  |
| H  | 2.2259804191  | 5.6581994292  | 0.2746504552  |



|   |               |               |               |
|---|---------------|---------------|---------------|
| C | -0.7088727954 | 3.3650909914  | -2.1455656290 |
| C | -0.9918563709 | 3.3029004465  | 0.9755985830  |
| C | -0.2429557300 | 5.8142736561  | -0.4777784527 |
| C | 5.8800710108  | 1.5684679125  | -2.2612043544 |
| C | 5.7945769886  | -0.8090141953 | -1.7036350712 |
| H | 5.5690007975  | -2.9011056077 | -1.2157519007 |
| C | 2.7700478137  | -4.3206506804 | -0.7555350544 |
| C | 4.7782669904  | -4.1688643409 | 1.5426601241  |
| C | 2.0326733493  | -2.9530002407 | 1.8900004553  |
| C | 6.6977672538  | 4.0079437330  | 1.0764869068  |
| H | 6.3742712699  | 1.9657076769  | 0.5353786853  |
| C | 4.8228937959  | 5.5123941650  | 0.8897342896  |
| C | -1.9232214230 | 3.9206380957  | -2.5946414826 |
| C | -0.0380208857 | 2.4551968554  | -2.9748025852 |
| C | -0.3277071997 | 3.0450674364  | 2.1947805029  |
| C | -2.3984619583 | 3.2350831964  | 0.9373095227  |
| C | 0.0933661406  | 6.5515625041  | -1.6268852442 |
| C | -0.7061556313 | 6.5015036326  | 0.6543997485  |
| C | 6.8695635246  | 1.3198202102  | -3.1806487795 |
| H | 5.5059638693  | 2.5840988934  | -2.1315977461 |
| C | 6.8268831229  | -1.0321844606 | -2.6556407853 |
| C | 3.1843343649  | -5.6496118714 | -0.9376254059 |
| C | 1.8293687825  | -3.7728414532 | -1.6451252188 |
| C | 4.6725829270  | -4.4912557174 | 2.9046426016  |
| C | 5.9350699372  | -4.5666377940 | 0.8486157549  |
| C | 2.2042080555  | -2.0207778364 | 2.9284433739  |
| C | 0.8507668371  | -3.7086759647 | 1.8407790167  |
| C | 6.1421361279  | 5.3039696090  | 1.2036486727  |
| H | 7.7418619681  | 3.8380564879  | 1.3487050162  |
| H | 4.3764995089  | 6.5046415964  | 0.9986615818  |
| C | -2.4472016679 | 3.5772643517  | -3.8438152908 |
| H | -2.4679421241 | 4.6404464710  | -1.9782439741 |
| C | -0.5572034638 | 2.1200336675  | -4.2330648164 |
| H | 0.9006511651  | 1.9854325650  | -2.6526551431 |
| C | -1.0621134442 | 2.7614054779  | 3.3578410641  |
| H | 0.7684652917  | 3.0551531689  | 2.2496194011  |
| C | -3.1311481744 | 2.9638810915  | 2.1047130907  |
| H | -2.9356622929 | 3.3887184929  | -0.0040925603 |
| C | -0.0320819202 | 7.9445349185  | -1.6416833640 |
| H | 0.4548400532  | 6.0444626849  | -2.5264782281 |
| C | -0.8331113273 | 7.8958570316  | 0.6401850036  |
| H | -0.9760164173 | 5.9593658006  | 1.5636434701  |
| C | 7.3606005819  | 0.0070163030  | -3.3754938856 |
| H | 7.2769919485  | 2.1429859539  | -3.7716236426 |
| H | 7.1817982076  | -2.0543230529 | -2.8113537752 |
| C | 2.6781601755  | -6.4150778083 | -1.9944641151 |
| H | 3.9042600101  | -6.1072678440 | -0.2553232394 |
| C | 1.3237822587  | -4.5389306126 | -2.7012704682 |
| H | 1.4692314382  | -2.7362775979 | -1.5170957703 |
| C | 5.6966012608  | -5.1894250719 | 3.5575605346  |
| H | 3.7879539964  | -4.2044717941 | 3.4795484170  |
| C | 6.9584105434  | -5.2639475052 | 1.4972053998  |
| H | 6.0509490434  | -4.3311803016 | -0.2142738327 |
| C | 1.2214824892  | -1.8646853398 | 3.9108765561  |
| H | 3.0981581869  | -1.3884827789 | 2.9649766404  |
| C | -0.1302642821 | -3.5584261716 | 2.8289938052  |
| H | 0.6765298655  | -4.4183904196 | 1.0271015823  |
| H | 6.7612511121  | 6.1293032760  | 1.5612787527  |
| C | -1.7599992003 | 2.6788322271  | -4.6684049563 |
| H | -3.3831811966 | 4.0157038827  | -4.1805611843 |

|   |               |               |               |
|---|---------------|---------------|---------------|
| H | -0.0170055274 | 1.4202428571  | -4.8685333260 |
| C | -2.4643477392 | 2.7407403900  | 3.3161485480  |
| H | -0.5396835819 | 2.5666201810  | 4.2941384496  |
| H | -4.2202223597 | 2.9383749648  | 2.0744318220  |
| C | -0.4960298600 | 8.6184743313  | -0.5073801769 |
| H | 0.2306453391  | 8.5041371847  | -2.5370633558 |
| H | -1.1949694840 | 8.4166339995  | 1.5240746735  |
| H | 8.1508059623  | -0.1764883090 | -4.1063191801 |
| C | 1.7489411637  | -5.8588207229 | -2.8785874643 |
| H | 3.0072486698  | -7.4424369656 | -2.1266517609 |
| H | 0.5973863583  | -4.1037844755 | -3.3845561361 |
| C | 6.8403725604  | -5.5764504310 | 2.8556238772  |
| H | 5.5989539448  | -5.4299861537 | 4.6138304273  |
| H | 7.8472907425  | -5.5628330022 | 0.9466139934  |
| C | 0.0606104019  | -2.6425565734 | 3.8655631955  |
| H | 1.3569226875  | -1.1297113963 | 4.6999915525  |
| H | -1.0395225049 | -4.1516066277 | 2.7837428359  |
| H | -2.1611338307 | 2.4198721900  | -5.6459511104 |
| H | -3.0359670099 | 2.5491669515  | 4.2241433079  |
| H | -0.5944562624 | 9.7021465276  | -0.5191546011 |
| H | 1.3568264751  | -6.4521455429 | -3.7015735000 |
| H | 7.6361725824  | -6.1180920915 | 3.3619994621  |
| H | -0.7031091143 | -2.5246202961 | 4.6383926227  |

TS2c2

0 1

|   |               |               |               |
|---|---------------|---------------|---------------|
| O | -0.9487964326 | -3.4097662783 | -1.0164605411 |
| C | -2.2023096366 | -3.0306463661 | -1.2034189397 |
| C | -2.4695039059 | -1.6710843753 | -1.8975951342 |
| C | -2.9494450662 | -3.7308597205 | -2.5313056267 |
| C | -3.2183696367 | -2.3158634608 | -3.0924375825 |
| H | -1.5088235796 | -1.2237062805 | -2.1761424831 |
| H | -3.0237205496 | -0.9338404763 | -1.3076693549 |
| H | -2.1212576067 | -4.2759229689 | -2.9973600618 |
| H | -3.8142329737 | -4.3976519786 | -2.4223842164 |
| C | -2.5184744305 | -2.0685299779 | -4.4336243693 |
| H | -2.9683815240 | -2.6773740311 | -5.2325543132 |
| H | -2.6153969621 | -1.0095319586 | -4.7161281501 |
| H | -1.4484087518 | -2.3127460864 | -4.3640612145 |
| C | -4.7011522065 | -1.9961750863 | -3.2340563766 |
| C | -5.2505997822 | -0.7904734304 | -2.7953684692 |
| C | -5.5445865248 | -2.9075893388 | -3.8835816180 |
| C | -6.6044052558 | -0.5100157779 | -2.9794661195 |
| H | -4.6203724803 | -0.0505408512 | -2.2933132286 |
| C | -6.8963026189 | -2.6330574380 | -4.0706231927 |
| H | -5.1386095164 | -3.8537331119 | -4.2525433704 |
| C | -7.4344290841 | -1.4304598258 | -3.6134285415 |
| H | -7.0085820769 | 0.4381242328  | -2.6177078636 |
| H | -7.5329297976 | -3.3617546763 | -4.5769310600 |
| C | -3.2127784326 | -3.5770689313 | -0.2946850140 |
| C | -2.8899892218 | -4.7965133358 | 0.4122074459  |
| H | -2.1105928686 | -5.3997187215 | -0.0600029167 |
| H | -3.7434002757 | -5.3594685638 | 0.8015439717  |
| C | -4.5370155435 | -2.9614910640 | -0.0829942953 |
| C | -4.6370223236 | -1.6939518094 | 0.5060164698  |
| C | -5.7018201161 | -3.6552188798 | -0.4363363609 |
| C | -5.8897146920 | -1.1270297927 | 0.7175926394  |
| H | -3.7347216071 | -1.1660611510 | 0.8287476629  |
| C | -6.9479369344 | -3.0648483637 | -0.2624834305 |
| H | -5.6298039195 | -4.6486575687 | -0.8847305501 |

|    |               |               |               |
|----|---------------|---------------|---------------|
| C  | -7.0417670509 | -1.8001758851 | 0.3161792139  |
| H  | -5.9635379336 | -0.1450732392 | 1.1888784877  |
| H  | -7.8480089708 | -3.5937611859 | -0.5787044163 |
| Mg | 0.5253970492  | -2.6695871051 | -0.0123181843 |
| O  | 0.3494976826  | 0.3912842571  | 1.8573886287  |
| O  | 0.7549034139  | -0.7910886153 | -0.4444273568 |
| O  | 1.1863826711  | -2.8904732237 | 1.8157439790  |
| C  | 0.8141578302  | -2.5319226749 | 2.9717875963  |
| C  | 1.6924470182  | -1.6969242470 | 3.8758010059  |
| N  | -0.3519776490 | -2.8351125277 | 3.5105556700  |
| C  | 0.7689839095  | -1.3941499243 | 5.0480172977  |
| H  | 2.0137788474  | -0.8103514387 | 3.3128373967  |
| H  | 2.5928017238  | -2.2743956058 | 4.1415557045  |
| C  | -0.4852630883 | -2.2265036244 | 4.7529856747  |
| Br | -1.9293922696 | -3.8794386736 | 1.9684971490  |
| H  | 1.1671159813  | -1.6545236930 | 6.0377146900  |
| H  | 0.4603342034  | -0.3361029540 | 5.0695326513  |
| O  | -1.4481575546 | -2.3180395542 | 5.4729488063  |
| H  | -8.4948712445 | -1.2121182831 | -3.7541028249 |
| H  | -8.0205025009 | -1.3384105656 | 0.4586546086  |
| P  | 0.8972725478  | 0.4142612792  | 0.4839679628  |
| O  | 2.4935182543  | 0.8063329608  | 0.5927809974  |
| O  | 0.3622669219  | 1.6525857330  | -0.4570767337 |
| C  | 3.1936712853  | 1.1500216323  | -0.5324651411 |
| C  | 0.7234710125  | 2.9422236893  | -0.1475085624 |
| C  | 2.9557216782  | 2.3903377592  | -1.0982990913 |
| C  | 4.1487782870  | 0.2369963400  | -1.0568792384 |
| C  | 2.0242173059  | 3.3347120539  | -0.4212568304 |
| C  | -0.2404064130 | 3.8252879809  | 0.4187012921  |
| C  | 3.6080325105  | 2.7204979124  | -2.3313085472 |
| C  | 4.8292867652  | 0.5903008283  | -2.2001171035 |
| Si | 4.4925313943  | -1.4391198877 | -0.2595099743 |
| C  | 2.4591588068  | 4.6365491934  | -0.0053682155 |
| C  | 0.1682123926  | 5.0970267825  | 0.7505251107  |
| Si | -2.0660377284 | 3.3934655693  | 0.6739870465  |
| C  | 3.3178046894  | 3.9090157401  | -3.0594871954 |
| C  | 4.5657431163  | 1.8153969499  | -2.8729548221 |
| H  | 5.5851614033  | -0.0741909656 | -2.6382438248 |
| C  | 4.7936554982  | -1.3883292963 | 1.5868002263  |
| C  | 3.1326361795  | -2.6473242814 | -0.7310961788 |
| C  | 6.0757654754  | -2.0966434768 | -1.0358937555 |
| C  | 3.8109692111  | 5.0697564136  | -0.1132897397 |
| C  | 1.5127631849  | 5.5259142168  | 0.5754926992  |
| H  | -0.5322886832 | 5.8238375749  | 1.1822487834  |
| C  | -2.3452696394 | 2.1185347240  | 2.0004907734  |
| C  | -2.9185941653 | 4.9792954701  | 1.2375833500  |
| C  | -2.8866212307 | 2.8986553394  | -0.9435398002 |
| C  | 3.9661855033  | 4.1935326841  | -4.2361505929 |
| H  | 2.5627765165  | 4.5961694178  | -2.6755968113 |
| C  | 5.2288171580  | 2.1451827096  | -4.0871030663 |
| C  | 5.3427402522  | -2.5353436821 | 2.1934880715  |
| C  | 4.5371569293  | -0.2642759296 | 2.3842286068  |
| C  | 2.4261640922  | -2.4491764852 | -1.9355024881 |
| C  | 2.8847762025  | -3.8126242812 | 0.0190991163  |
| C  | 7.3056950692  | -1.5615922089 | -0.6136622418 |
| C  | 6.0742372909  | -3.0873431684 | -2.0293237604 |
| C  | 4.1862555594  | 6.3249120538  | 0.2996487547  |
| H  | 4.5583703480  | 4.3892709348  | -0.5215613920 |
| C  | 1.9294774849  | 6.8224444308  | 0.9832473488  |
| C  | -3.5693101301 | 1.4288482485  | 2.0727636719  |

|   |               |               |               |
|---|---------------|---------------|---------------|
| C | -1.3725107476 | 1.8784944310  | 2.9849181878  |
| C | -3.1591946166 | 6.0155494963  | 0.3178480782  |
| C | -3.3146873528 | 5.1549709793  | 2.5718677043  |
| C | -2.1918413711 | 2.2575696625  | -1.9794660933 |
| C | -4.2455656056 | 3.2096206860  | -1.1372099216 |
| C | 4.9422259688  | 3.3092662840  | -4.7547313205 |
| H | 3.7230536305  | 5.1094933183  | -4.7792600164 |
| H | 5.9701883656  | 1.4463167584  | -4.4839596925 |
| C | 5.6144971861  | -2.5578182816 | 3.5641257572  |
| H | 5.5757538034  | -3.4233734354 | 1.5992470684  |
| C | 4.8164437397  | -0.2836738671 | 3.7576202259  |
| H | 4.1071129663  | 0.6474395982  | 1.9512493892  |
| C | 1.5195026542  | -3.4139244905 | -2.3974764981 |
| H | 2.5666015416  | -1.5322205638 | -2.5196365251 |
| C | 1.9651038896  | -4.7757111025 | -0.4369414074 |
| H | 3.3911553766  | -3.9825503544 | 0.9760215198  |
| C | 8.5064791984  | -2.0079551226 | -1.1751277413 |
| H | 7.3398023996  | -0.7915783903 | 0.1628290568  |
| C | 7.2759782316  | -3.5353561875 | -2.5911466778 |
| H | 5.1361414084  | -3.5258345612 | -2.3771611968 |
| C | 3.2357801527  | 7.2199321937  | 0.8451185268  |
| H | 5.2304017776  | 6.6326817716  | 0.2111660289  |
| H | 1.1868970841  | 7.4968837898  | 1.4184094049  |
| C | -3.8114952240 | 0.5134384167  | 3.1009603121  |
| H | -4.3448284193 | 1.6036256336  | 1.3247917633  |
| C | -1.6175380587 | 0.9587753026  | 4.0139673817  |
| H | -0.4018904711 | 2.3827899374  | 2.9548015218  |
| C | -3.7813505281 | 7.1997176915  | 0.7246361066  |
| H | -2.8643957498 | 5.9059478622  | -0.7292858978 |
| C | -3.9380801649 | 6.3409766847  | 2.9805058608  |
| H | -3.1449753978 | 4.3671121772  | 3.3116317944  |
| C | -2.8295551542 | 1.9566260633  | -3.1897771345 |
| H | -1.1361093745 | 1.9813767980  | -1.8609556510 |
| C | -4.8843528418 | 2.9085988583  | -2.3441984152 |
| H | -4.8212792319 | 3.7030346405  | -0.3489020436 |
| H | 5.4556624963  | 3.5508635499  | -5.6876486273 |
| C | 5.3520753875  | -1.4291800208 | 4.3490362500  |
| H | 6.0362211753  | -3.4503294400 | 4.0207951063  |
| H | 4.6112727207  | 0.5984074777  | 4.3615333401  |
| C | 1.2939501576  | -4.5839943292 | -1.6542049946 |
| H | 0.9774187211  | -3.2519677627 | -3.3283659063 |
| H | 1.7889901495  | -5.6768232819 | 0.1510195063  |
| C | 8.4926203326  | -2.9958904325 | -2.1650453877 |
| H | 9.4523613070  | -1.5875712813 | -0.8397622309 |
| H | 7.2619104169  | -4.3055437916 | -3.3591753454 |
| H | 3.5460096737  | 8.2167986858  | 1.1646803703  |
| C | -2.8285454030 | 0.2681953719  | 4.0675501683  |
| H | -4.7591125661 | -0.0148689080 | 3.1565352377  |
| H | -0.8382817609 | 0.7571317998  | 4.7513312900  |
| C | -4.1716085161 | 7.3637535894  | 2.0581998449  |
| H | -3.9632101697 | 7.9937544607  | 0.0039803563  |
| H | -4.2408205409 | 6.4635513119  | 4.0182147232  |
| C | -4.1732470427 | 2.2890291383  | -3.3772935476 |
| H | -2.2716901903 | 1.4694466539  | -3.9863434582 |
| H | -5.9312653111 | 3.1660053513  | -2.4838704542 |
| H | 5.5684236247  | -1.4446273932 | 5.4154685017  |
| H | 0.5850664652  | -5.3295868916 | -2.0149098961 |
| H | 9.4270148350  | -3.3441456022 | -2.6007234701 |
| H | -2.9989541300 | -0.4744894757 | 4.8510981669  |
| H | -4.6560299906 | 8.2849586374  | 2.3748444178  |

|       |               |               |               |
|-------|---------------|---------------|---------------|
| H     | -4.6661359775 | 2.0646121532  | -4.3211196944 |
| TS2d1 |               |               |               |
| 0 1   |               |               |               |
| C     | 3.9743791950  | 1.3730508631  | -1.1950737590 |
| C     | 4.9092448584  | 2.2189133728  | -2.1142403448 |
| C     | 5.7667653723  | 2.7574345809  | -0.9415658170 |
| H     | 5.4439382030  | 1.6903201553  | -2.9085991011 |
| H     | 4.2779626542  | 2.9885011097  | -2.5705024771 |
| C     | 4.2636022232  | -0.0527124087 | -0.9359129099 |
| C     | 3.1698796103  | -0.8787270724 | -0.4740913301 |
| H     | 2.2484757369  | -0.6811548290 | -1.0424992544 |
| H     | 3.4014813258  | -1.9470580761 | -0.4055214840 |
| O     | 1.0332128519  | 2.5829179615  | 1.7305551168  |
| C     | 0.8614637854  | 1.9440030699  | 2.8107933184  |
| C     | -0.3282306404 | 2.1997726766  | 3.7091093951  |
| N     | 1.6587331414  | 0.9926514197  | 3.2578095448  |
| C     | -0.2255553297 | 1.0711941166  | 4.7253561249  |
| H     | -0.2509563749 | 3.2087436014  | 4.1431990881  |
| H     | -1.2411333198 | 2.1750738382  | 3.0952760171  |
| C     | 1.1189841365  | 0.4149178627  | 4.4040049360  |
| Br    | 2.6745404320  | -0.1944255350 | 1.3880788261  |
| H     | -1.0000139491 | 0.3087846311  | 4.5650608430  |
| H     | -0.2565896151 | 1.3826597970  | 5.7777911308  |
| O     | 1.6264764372  | -0.4812657434 | 5.0305797685  |
| O     | 2.6944657661  | 1.7202879667  | -1.2168235170 |
| C     | 4.8572508813  | 2.0249875843  | 0.0631398015  |
| H     | 4.1404501075  | 2.6635348713  | 0.5933068976  |
| H     | 5.3220874557  | 1.3440349443  | 0.7820212811  |
| C     | 5.7068265390  | 4.2804916882  | -0.7846725284 |
| H     | 6.2284993614  | 4.7772986675  | -1.6168046520 |
| H     | 6.1920108395  | 4.5908473617  | 0.1532465589  |
| H     | 4.6636395893  | 4.6300251107  | -0.7685373141 |
| C     | 7.2242806411  | 2.3174159901  | -0.9755947077 |
| C     | 7.9598203768  | 2.4777641615  | -2.1572760042 |
| C     | 7.8838687539  | 1.8123427164  | 0.1473211084  |
| C     | 9.3033057495  | 2.1199829300  | -2.2240114516 |
| H     | 7.4714777066  | 2.8866820034  | -3.0462918570 |
| C     | 9.2292385513  | 1.4490979533  | 0.0850235153  |
| H     | 7.3473107669  | 1.6870673447  | 1.0901075078  |
| C     | 9.9435726402  | 1.5963009050  | -1.1010516705 |
| H     | 9.8539049061  | 2.2506672182  | -3.1582575418 |
| H     | 9.7192312750  | 1.0455489202  | 0.9737653138  |
| H     | 10.9960663627 | 1.3096032514  | -1.1499505714 |
| C     | 5.6078493641  | -0.6539685142 | -0.9436558076 |
| C     | 6.4487604937  | -0.6081649244 | -2.0641675230 |
| C     | 6.0452736856  | -1.3322134861 | 0.2100198733  |
| C     | 7.7044955142  | -1.2056685022 | -2.0254002628 |
| H     | 6.1131580182  | -0.1355612383 | -2.9853416368 |
| C     | 7.3137194456  | -1.8956974029 | 0.2541044909  |
| H     | 5.3963747207  | -1.3815391562 | 1.0878873931  |
| C     | 8.1466462419  | -1.8318239621 | -0.8633164151 |
| H     | 8.3460703585  | -1.1660414108 | -2.9066474935 |
| H     | 7.6515405630  | -2.3915128375 | 1.1656736189  |
| H     | 9.1425876202  | -2.2770881102 | -0.8288515875 |
| Mg    | 1.1224542170  | 1.9760033087  | -0.1342023617 |
| O     | -0.4446524512 | 0.8968160000  | -0.4799201797 |
| P     | -1.2718725785 | -0.0107904292 | 0.4300282775  |
| O     | -0.7508082886 | -0.4595184290 | 1.7414120891  |
| O     | -2.7362108199 | 0.6880839554  | 0.6942150255  |

|    |               |               |               |
|----|---------------|---------------|---------------|
| O  | -1.7017301493 | -1.2218389075 | -0.5917772235 |
| C  | -3.6460243171 | 0.8417024727  | -0.3187065648 |
| C  | -2.6924575856 | -2.0846237017 | -0.1916339846 |
| C  | -4.2886911546 | -0.2837564516 | -0.8037898374 |
| C  | -3.9150703769 | 2.1504740066  | -0.8035767218 |
| C  | -3.9971590807 | -1.6187886329 | -0.2093177604 |
| C  | -2.3510647035 | -3.4069070491 | 0.2084169084  |
| C  | -5.1933408278 | -0.1356844153 | -1.9071858192 |
| C  | -4.8373612418 | 2.2961220890  | -1.8142215677 |
| Si | -3.0376083354 | 3.6678636977  | -0.1049235627 |
| C  | -5.0302725417 | -2.4356162562 | 0.3556585198  |
| C  | -3.3616079178 | -4.2076634801 | 0.6907228068  |
| Si | -0.6639032866 | -4.2411427808 | 0.0036459667  |
| C  | -5.7995322237 | -1.2469835389 | -2.5592890280 |
| C  | -5.4815999120 | 1.1706193543  | -2.3979982770 |
| H  | -5.0894527920 | 3.2868252204  | -2.2135680593 |
| C  | -3.2234693644 | 3.8469041009  | 1.7491579046  |
| C  | -1.2383605455 | 3.6849875761  | -0.6376126549 |
| C  | -3.8423987880 | 5.1800408770  | -0.8836595691 |
| C  | -6.3694573386 | -1.9815329398 | 0.5164090820  |
| C  | -4.7009411739 | -3.7428288767 | 0.8115978763  |
| H  | -3.1630790812 | -5.2398801622 | 1.0070421694  |
| C  | 0.3019371472  | -4.3508435992 | 1.5967285306  |
| C  | -1.0802521033 | -5.9754655396 | -0.6174624910 |
| C  | 0.4720475476  | -3.5158049863 | -1.3096916429 |
| C  | -6.6666946963 | -1.0653228537 | -3.6086580785 |
| H  | -5.5632846987 | -2.2562944002 | -2.2204903059 |
| C  | -6.3925512689 | 1.3257223602  | -3.4789442284 |
| C  | -2.9414302887 | 5.0973491419  | 2.3322395660  |
| C  | -3.6560575969 | 2.7999623755  | 2.5757802701  |
| C  | -0.8750894163 | 3.0608899929  | -1.8471033239 |
| C  | -0.2625980900 | 4.3976222496  | 0.0776397303  |
| C  | -5.0846085820 | 5.6179860976  | -0.3913870098 |
| C  | -3.2551733408 | 5.8745956333  | -1.9519773688 |
| C  | -7.3277850214 | -2.7928709914 | 1.0733824138  |
| H  | -6.6306833605 | -0.9710973219 | 0.2004210113  |
| C  | -5.7175826880 | -4.5618688191 | 1.3739892658  |
| C  | 1.0843219481  | -5.4877216310 | 1.8799384922  |
| C  | 0.3370121224  | -3.2674989967 | 2.4871700533  |
| C  | -1.1558773712 | -6.2173507217 | -1.9988311416 |
| C  | -1.3530618398 | -7.0327309136 | 0.2668506177  |
| C  | 0.0826559218  | -2.5894244745 | -2.2861978371 |
| C  | 1.7859757881  | -4.0220216846 | -1.3496732219 |
| C  | -6.9790364673 | 0.2354690944  | -4.0706741747 |
| H  | -7.1162804755 | -1.9344433388 | -4.0941354911 |
| H  | -6.6120545561 | 2.3357002614  | -3.8358384473 |
| C  | -3.0809810332 | 5.2898839432  | 3.7094872098  |
| H  | -2.6188141974 | 5.9399345013  | 1.7144897898  |
| C  | -3.8013643264 | 2.9943899679  | 3.9560498213  |
| H  | -3.8768292848 | 1.8087753375  | 2.1599275470  |
| C  | 0.4225931273  | 3.1997465657  | -2.3610870081 |
| H  | -1.5962007926 | 2.4461419862  | -2.3974529235 |
| C  | 1.0399145473  | 4.5411706788  | -0.4320553616 |
| H  | -0.4954773861 | 4.8482333895  | 1.0476145070  |
| C  | -5.7243839383 | 6.7255420686  | -0.9572719773 |
| H  | -5.5652368260 | 5.1000478745  | 0.4438851980  |
| C  | -3.8947675270 | 6.9838921486  | -2.5186395736 |
| H  | -2.2893092893 | 5.5619865676  | -2.3556550354 |
| C  | -7.0049463079 | -4.1027441875 | 1.5003478313  |
| H  | -8.3478663036 | -2.4212237961 | 1.1925956293  |

|   |               |               |               |
|---|---------------|---------------|---------------|
| H | -5.4516590481 | -5.5675206255 | 1.7107748651  |
| C | 1.8731407487  | -5.5423743518 | 3.0310943063  |
| H | 1.0893608407  | -6.3447925398 | 1.2033160127  |
| C | 1.1385337457  | -3.3189854186 | 3.6358772882  |
| H | -0.2500145729 | -2.3527534029 | 2.3024469214  |
| C | -1.4921535595 | -7.4865956427 | -2.4849042557 |
| H | -0.9511466966 | -5.4180427840 | -2.7163600786 |
| C | -1.6876337904 | -8.3018188411 | -0.2170990548 |
| H | -1.3044449915 | -6.8791783081 | 1.3481932902  |
| C | 0.9823663703  | -2.1703331943 | -3.2757109558 |
| H | -0.9306271135 | -2.1701327887 | -2.2896724637 |
| C | 2.6802590012  | -3.6174262586 | -2.3459728355 |
| H | 2.1270939799  | -4.7448894410 | -0.6018820699 |
| H | -7.6754536908 | 0.3663741851  | -4.9015053079 |
| C | -3.5129265521 | 4.2368614691  | 4.5239019457  |
| H | -2.8593330653 | 6.2598219691  | 4.1486982875  |
| H | -4.1374873151 | 2.1709551674  | 4.5838509504  |
| C | 1.3782716838  | 3.9631529489  | -1.6671219273 |
| H | 0.6937222457  | 2.7163863082  | -3.2997552734 |
| H | 1.7778050611  | 5.1177394884  | 0.1251841002  |
| C | -5.1296100839 | 7.4098568558  | -2.0222712947 |
| H | -6.6848103545 | 7.0561106091  | -0.5672802178 |
| H | -3.4285642090 | 7.5149548932  | -3.3455934163 |
| H | -7.7770656305 | -4.7394247054 | 1.9370180984  |
| C | 1.9018945178  | -4.4535080735 | 3.9113116610  |
| H | 2.4659672602  | -6.4275500896 | 3.2437950513  |
| H | 1.1748006028  | -2.4564700092 | 4.3102046295  |
| C | -1.7576453617 | -8.5305959561 | -1.5948777890 |
| H | -1.5465204546 | -7.6590234767 | -3.5574518922 |
| H | -1.8931770373 | -9.1116901455 | 0.4791822226  |
| C | 2.2785023083  | -2.6883767187 | -3.3118535898 |
| H | 0.6635419307  | -1.4417367355 | -4.0180254760 |
| H | 3.6838448765  | -4.0337617042 | -2.3759464716 |
| H | -3.6251890834 | 4.3875928166  | 5.5958367568  |
| H | 2.3788918948  | 4.0929941616  | -2.0838289624 |
| H | -5.6269400811 | 8.2721880378  | -2.4617877173 |
| H | 2.5201696407  | -4.4896964349 | 4.8058927121  |
| H | -2.0181090115 | -9.5171071375 | -1.9717370377 |
| H | 2.9694895487  | -2.3781271508 | -4.0913977601 |

TS2d2

0 1

|    |               |               |               |
|----|---------------|---------------|---------------|
| C  | -4.2652531333 | -0.7343638590 | -0.2046975305 |
| C  | -4.7834061253 | -0.0450557223 | 1.0947550420  |
| C  | -4.5395358131 | -1.2847523734 | 1.9898071325  |
| H  | -5.8018781275 | 0.3549335068  | 1.0781022188  |
| H  | -4.0888441907 | 0.7782119976  | 1.3013304376  |
| C  | -5.2086080039 | -1.3886044028 | -1.1322371302 |
| C  | -4.7721401116 | -1.5651653367 | -2.4942536962 |
| H  | -4.2456977119 | -0.6654144609 | -2.8504950100 |
| H  | -5.5305911231 | -1.9548913882 | -3.1782989055 |
| Mg | -1.2745580064 | -0.4033263884 | -0.9540504266 |
| O  | -0.2366523818 | 0.9294592583  | 0.2862624623  |
| O  | 0.7538647744  | -0.0531303745 | -1.7653414704 |
| O  | -0.7696439756 | -2.2439273771 | -0.4074985958 |
| C  | -0.5327795343 | -3.4002556606 | -0.8287463062 |
| C  | 0.5525930091  | -4.2683597381 | -0.2310634179 |
| N  | -1.1843457446 | -4.0101510615 | -1.8127891069 |
| C  | 0.4420427563  | -5.5642656613 | -1.0250176426 |
| H  | 0.3898852234  | -4.3692473584 | 0.8529071043  |

|    |               |               |               |
|----|---------------|---------------|---------------|
| H  | 1.5172926195  | -3.7469458329 | -0.3529572513 |
| C  | -0.7092698870 | -5.3037507791 | -2.0026364280 |
| Br | -3.1794387142 | -2.8920165831 | -2.3895170513 |
| H  | 1.3486739208  | -5.8006247760 | -1.6027447931 |
| H  | 0.2033363961  | -6.4471406510 | -0.4162348110 |
| O  | -1.1414563094 | -6.0930301002 | -2.8030199530 |
| O  | -3.1989755552 | -0.1724273492 | -0.7613668111 |
| C  | -3.9462333102 | -2.0419932382 | 0.7866661654  |
| H  | -2.8533570127 | -2.1319392532 | 0.7860739592  |
| H  | -4.3821494820 | -3.0099940236 | 0.5214565816  |
| C  | -3.5032732784 | -1.0474162973 | 3.0934427997  |
| H  | -3.9028812021 | -0.3676330970 | 3.8613315385  |
| H  | -3.2401725750 | -1.9970288146 | 3.5844684830  |
| H  | -2.5853800786 | -0.6055555411 | 2.6769705274  |
| C  | -5.8019019926 | -1.8769565331 | 2.6000479252  |
| C  | -6.7053060673 | -1.0339613536 | 3.2605996202  |
| C  | -6.0758555964 | -3.2466393001 | 2.5788383706  |
| C  | -7.8582295165 | -1.5377622529 | 3.8560844462  |
| H  | -6.5056734848 | 0.0404406538  | 3.3058367900  |
| C  | -7.2309716480 | -3.7567700628 | 3.1713562320  |
| H  | -5.3869684302 | -3.9359750514 | 2.0861690575  |
| C  | -8.1300121908 | -2.9049597839 | 3.8077667980  |
| H  | -8.5489810596 | -0.8589170573 | 4.3614222625  |
| H  | -7.4277382392 | -4.8304100249 | 3.1310152826  |
| H  | -9.0356112891 | -3.3039614171 | 4.2695229986  |
| C  | -6.4761160093 | -2.0269944479 | -0.7335874914 |
| C  | -7.5010975483 | -1.3297321578 | -0.0803323471 |
| C  | -6.6686017295 | -3.3853010502 | -1.0476212223 |
| C  | -8.6816925699 | -1.9785998623 | 0.2684072083  |
| H  | -7.3938632972 | -0.2677275066 | 0.1343038530  |
| C  | -7.8354195146 | -4.0356616761 | -0.6668063426 |
| H  | -5.8772819615 | -3.9385710511 | -1.5592395050 |
| C  | -8.8442021073 | -3.3335256021 | -0.0065414028 |
| H  | -9.4711403926 | -1.4219441668 | 0.7756220481  |
| H  | -7.9583537812 | -5.0971898566 | -0.8891508740 |
| H  | -9.7613651994 | -3.8448063532 | 0.2920295576  |
| P  | 0.9990570683  | 0.8728275564  | -0.5974752354 |
| O  | 2.2687052352  | 0.4777358342  | 0.3431565190  |
| O  | 1.4801364526  | 2.3171541987  | -1.1590239440 |
| C  | 3.5713812778  | 0.8549206540  | 0.0885974827  |
| C  | 1.6933175019  | 3.2781770541  | -0.1903389047 |
| C  | 3.8982892877  | 2.2036216377  | 0.1079273593  |
| C  | 4.5463290659  | -0.1618092774 | -0.1387096201 |
| C  | 2.8849218308  | 3.2216189189  | 0.5006870622  |
| C  | 0.6737688432  | 4.2260730177  | 0.0756493911  |
| C  | 5.2170149473  | 2.6053817714  | -0.2902618548 |
| C  | 5.8271151184  | 0.2370192311  | -0.4496898011 |
| Si | 4.3202229745  | -2.0313634817 | 0.0596148546  |
| C  | 3.0826881435  | 4.1283397228  | 1.5942865307  |
| C  | 0.8907877687  | 5.1318542045  | 1.0869987882  |
| Si | -0.9823236163 | 4.2581834383  | -0.8372858258 |
| C  | 5.5878843823  | 3.9695867004  | -0.4575114059 |
| C  | 6.1883704578  | 1.6063638080  | -0.5686731300 |
| H  | 6.6232029151  | -0.4978300566 | -0.6283640817 |
| C  | 3.2439031395  | -2.5504753865 | 1.5052143507  |
| C  | 3.6700685127  | -2.8551099738 | -1.4896789412 |
| C  | 6.0397349158  | -2.7188375064 | 0.4262067771  |
| C  | 4.2234657838  | 4.0744763716  | 2.4430606129  |
| C  | 2.0794094885  | 5.1026239355  | 1.8698627847  |
| H  | 0.1327168146  | 5.8834168031  | 1.3397807713  |



|   |               |               |               |
|---|---------------|---------------|---------------|
| C | -2.3081746007 | 4.1355238089  | 0.4774288606  |
| C | -1.1379380368 | 5.8913273016  | -1.7516655432 |
| C | -1.1258746222 | 2.9047029639  | -2.1182564317 |
| C | 6.8595461540  | 4.3126427066  | -0.8474620547 |
| H | 4.8471616611  | 4.7500975464  | -0.2831957491 |
| C | 7.4995571084  | 1.9919483378  | -0.9591370867 |
| C | 3.2197020742  | -3.9277452163 | 1.8066666867  |
| C | 2.4860548657  | -1.6790790991 | 2.2973493855  |
| C | 2.8184587107  | -2.1933631778 | -2.3853429106 |
| C | 3.9926676575  | -4.2040891702 | -1.7383939770 |
| C | 6.4908115808  | -2.7859406352 | 1.7545126196  |
| C | 6.8989755380  | -3.1442244314 | -0.6007933052 |
| C | 4.3730261990  | 4.9603905483  | 3.4820090414  |
| H | 4.9831597752  | 3.3123555800  | 2.2662149515  |
| C | 2.2697107015  | 6.0109629010  | 2.9470451734  |
| C | -3.2824265640 | 5.1277837839  | 0.6673234668  |
| C | -2.2800766528 | 3.0329210091  | 1.3499655107  |
| C | -2.2816566665 | 6.0932859311  | -2.5462413248 |
| C | -0.1670693704 | 6.9017381713  | -1.6969387929 |
| C | -0.1824727047 | 2.8817786294  | -3.1589853008 |
| C | -2.0997908593 | 1.8915702891  | -2.0594873069 |
| C | 7.8337685877  | 3.3162807132  | -1.0923789295 |
| H | 7.1192029025  | 5.3656328231  | -0.9750314181 |
| H | 8.2371437044  | 1.2097874988  | -1.1578686807 |
| C | 2.4488253018  | -4.4154124535 | 2.8649063802  |
| H | 3.8077507485  | -4.6377073257 | 1.2180837653  |
| C | 1.7090358506  | -2.1674563729 | 3.3574429998  |
| H | 2.4801985927  | -0.6006071248 | 2.1025435358  |
| C | 2.2893494928  | -2.8649000019 | -3.4965496893 |
| H | 2.5322554128  | -1.1447930959 | -2.2358329161 |
| C | 3.4760822791  | -4.8698385393 | -2.8527007832 |
| H | 4.6553542757  | -4.7526163327 | -1.0642272269 |
| C | 7.7697497349  | -3.2725332430 | 2.0501557198  |
| H | 5.8477161307  | -2.4617212913 | 2.5778351345  |
| C | 8.1765629276  | -3.6321031728 | -0.3065659800 |
| H | 6.5798679442  | -3.1009089970 | -1.6456987038 |
| C | 3.3921911581  | 5.9485597100  | 3.7340867607  |
| H | 5.2549356233  | 4.8974783066  | 4.1230160284  |
| H | 1.4955879464  | 6.7572339355  | 3.1438973150  |
| C | -4.2085836061 | 5.0264841799  | 1.7123592488  |
| H | -3.3300327198 | 5.9961235775  | 0.0060151011  |
| C | -3.1978934847 | 2.9392774718  | 2.4019170241  |
| H | -1.5355717483 | 2.2275951597  | 1.2186302581  |
| C | -2.4531839220 | 7.2842013184  | -3.2586081599 |
| H | -3.0493398642 | 5.3179573337  | -2.6223161888 |
| C | -0.3378046510 | 8.0947510102  | -2.4107623297 |
| H | 0.7398961709  | 6.7724176646  | -1.1024294969 |
| C | -0.1704200667 | 1.8354342270  | -4.0930086040 |
| H | 0.5791091752  | 3.6649656496  | -3.2391612001 |
| C | -2.0963737081 | 0.8522835957  | -3.0049195702 |
| H | -2.8905101529 | 1.9128687511  | -1.2899983984 |
| H | 8.8424334416  | 3.6030648107  | -1.3960028384 |
| C | 1.6884110523  | -3.5334958545 | 3.6418386901  |
| H | 2.4422652798  | -5.4795151983 | 3.0881589076  |
| H | 1.1188803603  | -1.4748418815 | 3.9542588935  |
| C | 2.6167863226  | -4.2005642303 | -3.7326082839 |
| H | 1.6119551384  | -2.3374728889 | -4.1672479377 |
| H | 3.7412739950  | -5.9078539586 | -3.0392719221 |
| C | 8.6134985297  | -3.6972213237 | 1.0202348497  |
| H | 8.1059165506  | -3.3204553338 | 3.0837633827  |

|   |               |               |               |
|---|---------------|---------------|---------------|
| H | 8.8303630694  | -3.9623295572 | -1.1108808113 |
| H | 3.5251580949  | 6.6491321873  | 4.5608524046  |
| C | -4.1627619956 | 3.9347756690  | 2.5838904293  |
| H | -4.9588015417 | 5.8012623541  | 1.8492355940  |
| H | -3.1521683590 | 2.0923450450  | 3.0839443128  |
| C | -1.4810550950 | 8.2878855206  | -3.1899974246 |
| H | -3.3411622808 | 7.4293428190  | -3.8698777346 |
| H | 0.4231783844  | 8.8704628102  | -2.3595352647 |
| C | -1.1124425564 | 0.8110847227  | -4.0049452468 |
| H | 0.5903482947  | 1.8134897760  | -4.8707098583 |
| H | -2.9145561940 | 0.1134465723  | -3.0114933926 |
| H | 1.0868953819  | -3.9126650829 | 4.4650546496  |
| H | 2.2030584913  | -4.7223178362 | -4.5942314111 |
| H | 9.6068175076  | -4.0774190367 | 1.2495786142  |
| H | -4.8732130840 | 3.8624559812  | 3.4043560286  |
| H | -1.6141416089 | 9.2144221529  | -3.7447488847 |
| H | -1.0915001598 | -0.0182465171 | -4.7114905746 |
